# Supplementary material for: Single-cell expression profiling reveals dynamic flux of cardiac stromal, vascular and immune cells in health and injury
Source: eLife journal article supplement (doi:10.7554/elife.43882), 2019-03-26

Figure 4 - figure supplement 3

Expression of GFP<sup>+</sup> sub-population markers across GFP<sup>+</sup> cells

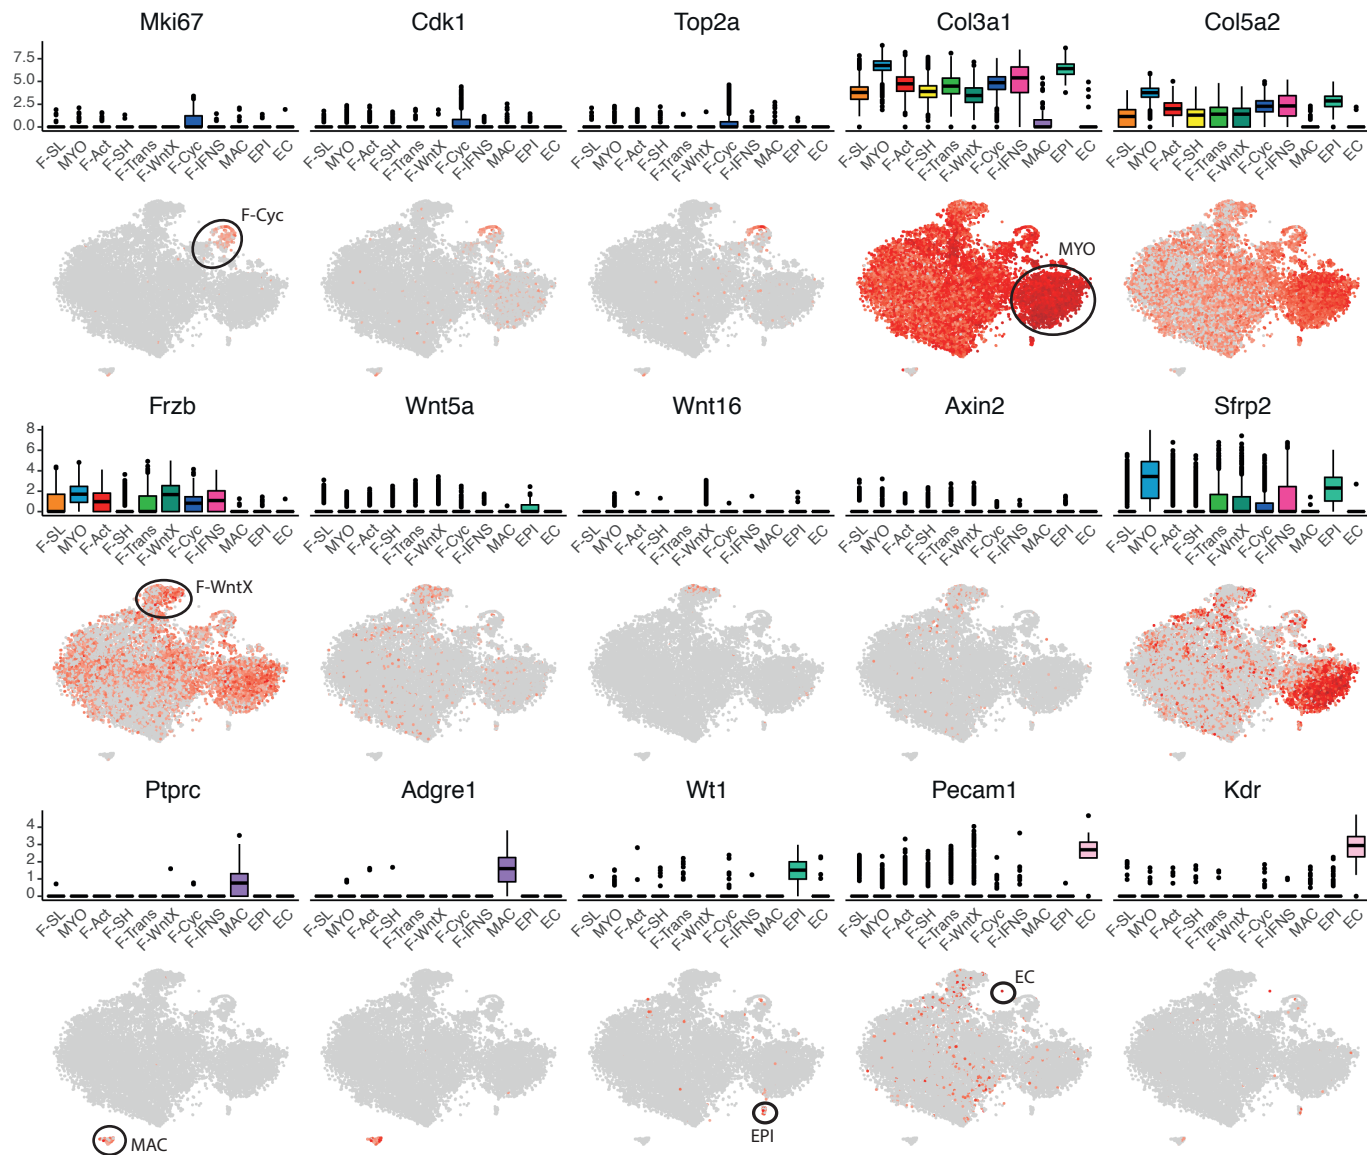

Supplement: supp [file elife-43882-supp-v1.zip]
