# Supplementary material for: Single-cell expression profiling reveals dynamic flux of cardiac stromal, vascular and immune cells in health and injury
Source: eLife journal article supplement (doi:10.7554/elife.43882), 2019-03-26

Figure 1 - figure supplement 2

**A**

**Pdgfra & GFP expression across populations in TIP**

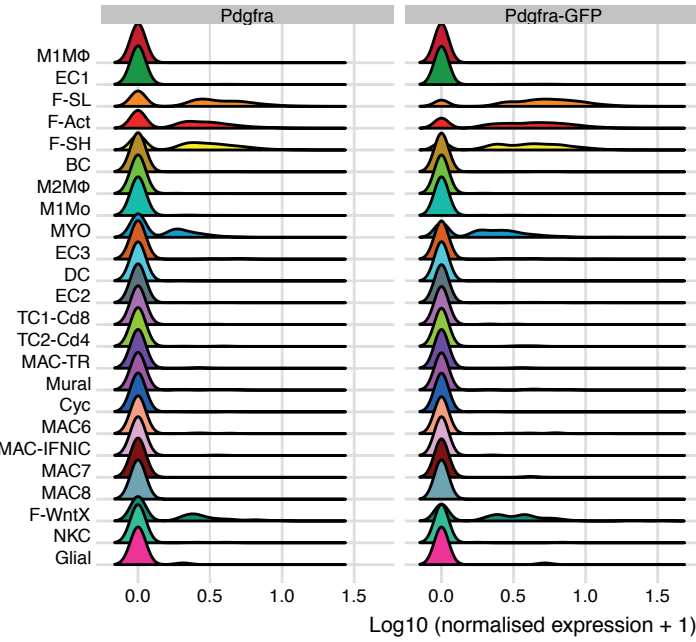

**B**

**Expression of EC sub-population markers**

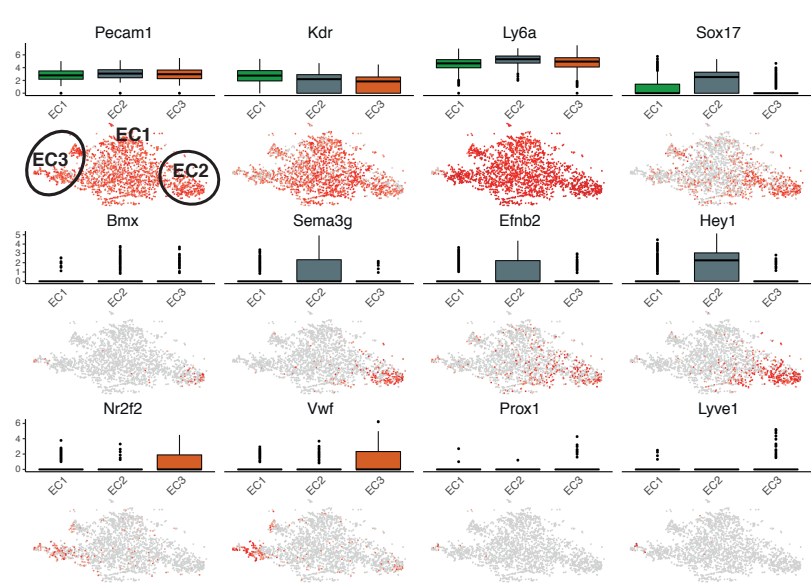

**C**

**Expression of cell cycle markers in TIP**

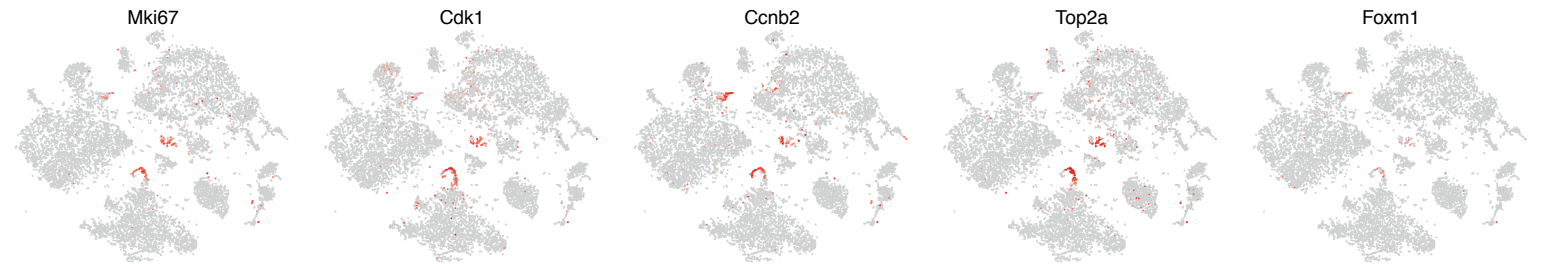

**D**

**Visualization of top lymphoid markers**

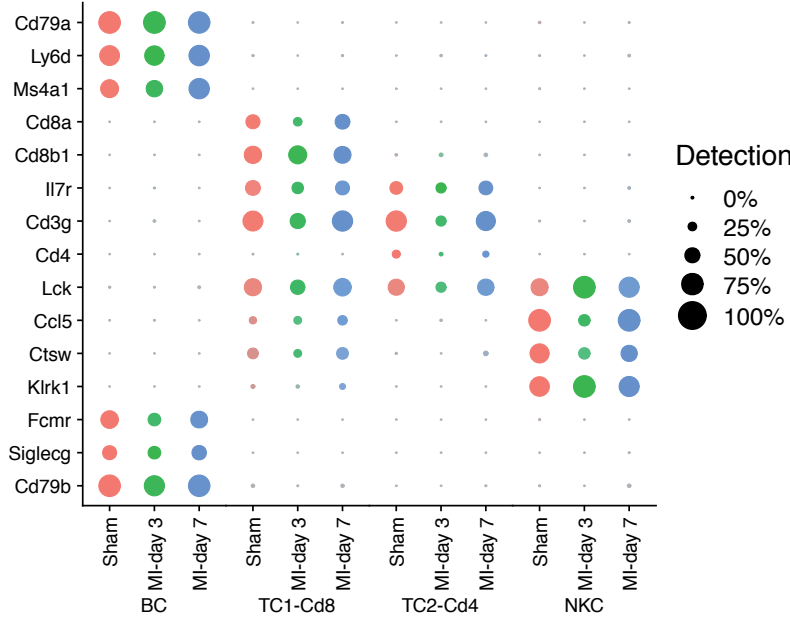

Supplement: supp [file elife-43882-supp-v1.zip]
