# Supplementary material for: Single-cell expression profiling reveals dynamic flux of cardiac stromal, vascular and immune cells in health and injury
Source: eLife journal article supplement (doi:10.7554/elife.43882), 2019-03-26
Supplement: supp [file elife-43882-supp-v1.zip]

Archive with 35 entries (35 files):
- elife_poa_e43882_Figure_3_figure_supplement_1.pdf
- elife_poa_e43882_Figure_1_figure_supplement_4.pdf
- elife_poa_e43882_Figure_4_source_data_1.xlsx
- elife_poa_e43882_Figure_4_figure_supplement_3.pdf
- elife_poa_e43882_Supplementary_File_5.xlsx
- elife_poa_e43882_Supplementary_File_9.xlsx
- elife_poa_e43882_Figure_1_figure_supplement_7.pdf
- elife_poa_e43882_Figure_5_figure_supplement_1.pdf
- elife_poa_e43882_Supplementary_File_7.xlsx
- elife_poa_e43882_Supplementary_File_8.xlsx
- elife_poa_e43882_Supplementary_File_10.xlsx
- elife_poa_e43882_Figure_6_figure_supplement_1.pdf
- elife_poa_e43882_Figure_1_figure_supplement_5.pdf
- elife_poa_e43882_Figure_8_figure_supplement_1.pdf
- elife_poa_e43882_Figure_1_figure_supplement_8.pdf
- elife_poa_e43882_Figure_1_source_data_1.xlsx
- elife_poa_e43882_Supplementary_File_3.xlsx
- elife_poa_e43882_Supplementary_File_1.xlsx
- elife_poa_e43882_Supplementary_File_11.xlsx
- elife_poa_e43882_Figure_6_source_data_1.xlsx
- elife_poa_e43882_Figure_4_figure_supplement_2.pdf
- elife_poa_e43882_Figure_4_figure_supplement_4.pdf
- elife_poa_e43882_Figure_1_figure_supplement_6.pdf
- elife_poa_e43882_Supplementary_File_6.xlsx
- elife_poa_e43882_Figure_2_figure_supplement_1.pdf
- elife_poa_e43882_Figure_4_figure_supplement_5.pdf
- elife_poa_e43882_Figure_1_figure_supplement_2.pdf
- elife_poa_e43882_Figure_6_figure_supplement_2.pdf
- elife_poa_e43882_Transparent_Reporting_File.docx
- elife_poa_e43882_Figure_4_figure_supplement_1.pdf
- elife_poa_e43882_Supplementary_File_2.xlsx
- elife_poa_e43882_Source_code_1.zip
- elife_poa_e43882_Figure_1_figure_supplement_3.pdf
- elife_poa_e43882_Supplementary_File_4.xlsx
- elife_poa_e43882_Figure_1_figure_supplement_1.pdf
