# Supplementary material for: Single-cell expression profiling reveals dynamic flux of cardiac stromal, vascular and immune cells in health and injury
Source: eLife journal article supplement (doi:10.7554/elife.43882), 2019-03-26

Figure 1 - figure supplement 1

**A**

Diagram of experimental procedures

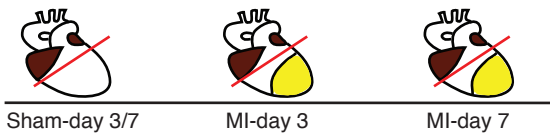

**B**

TIP cluster percentages at 3 & 7 days post-Sham/MI

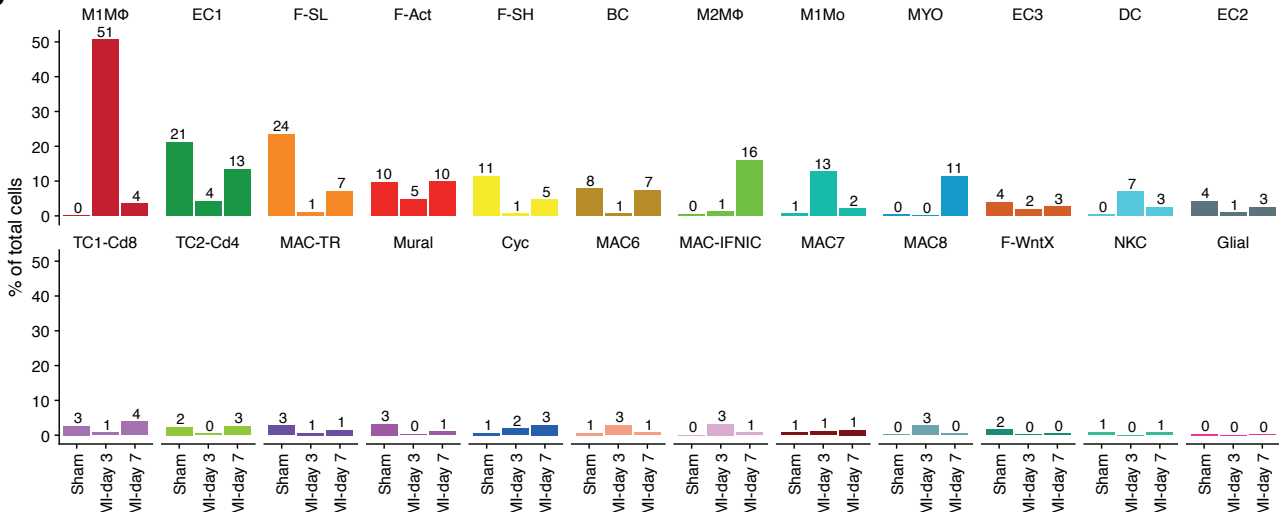

**C**

TIP lineage percentages at 3 & 7 days post-Sham/MI

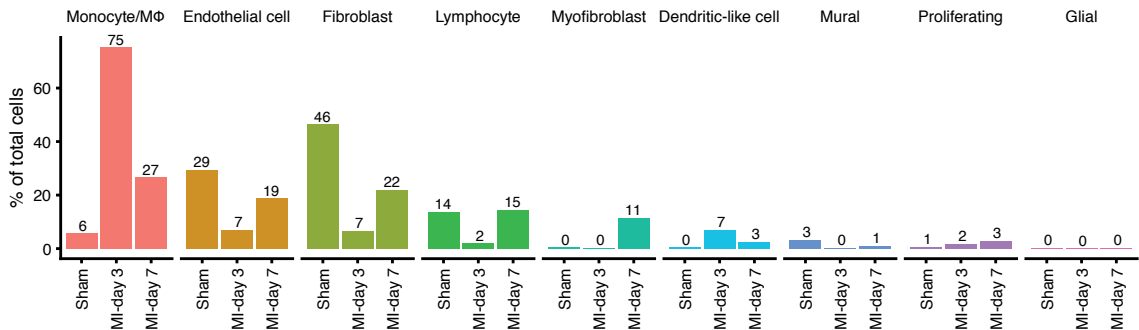

**D**

Marker genes visualised in dot plot

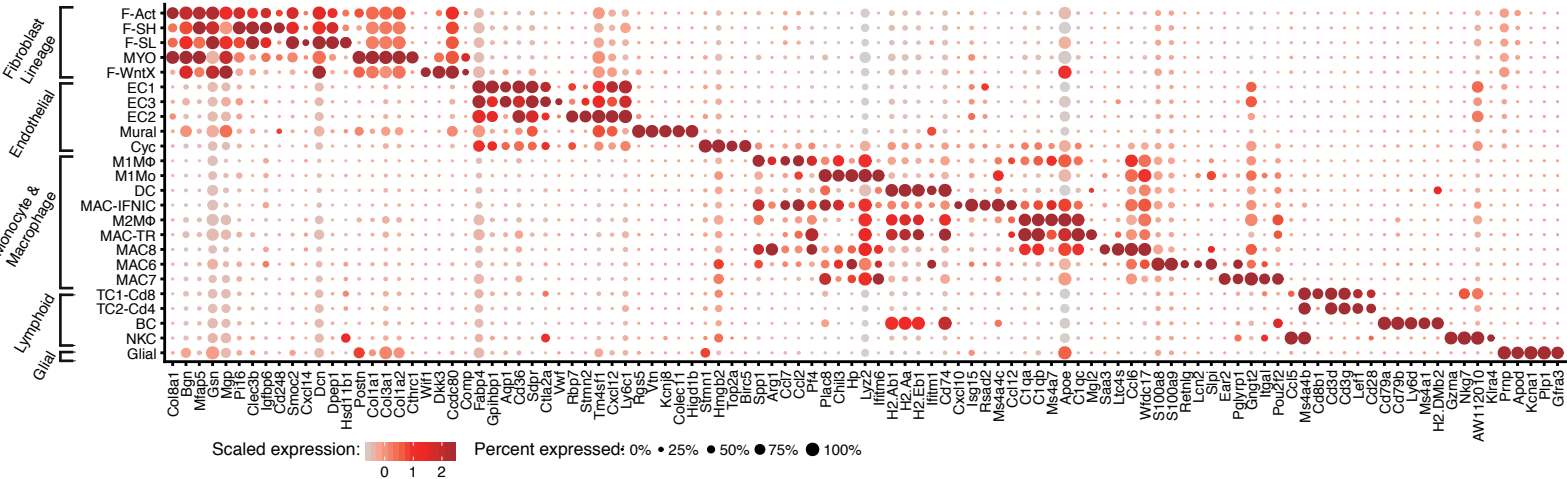

**E**

Number of UMIs across populations

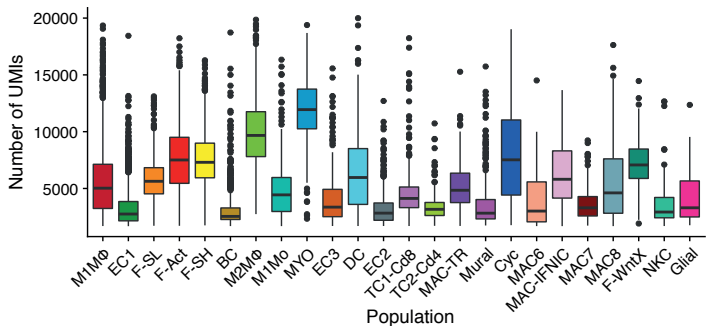

**F**

Number of detected genes across populations

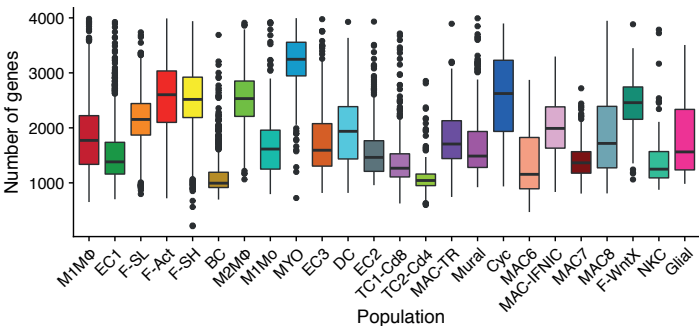

Supplement: supp [file elife-43882-supp-v1.zip › elife_poa_e43882_Figure_1_figure_supplement_1.pdf]
