# Supplementary material for: Single-cell expression profiling reveals dynamic flux of cardiac stromal, vascular and immune cells in health and injury
Source: eLife journal article supplement (doi:10.7554/elife.43882), 2019-03-26

Figure 1 - figure supplement 8

AF-associated genes up-regulated in EC sub-populations

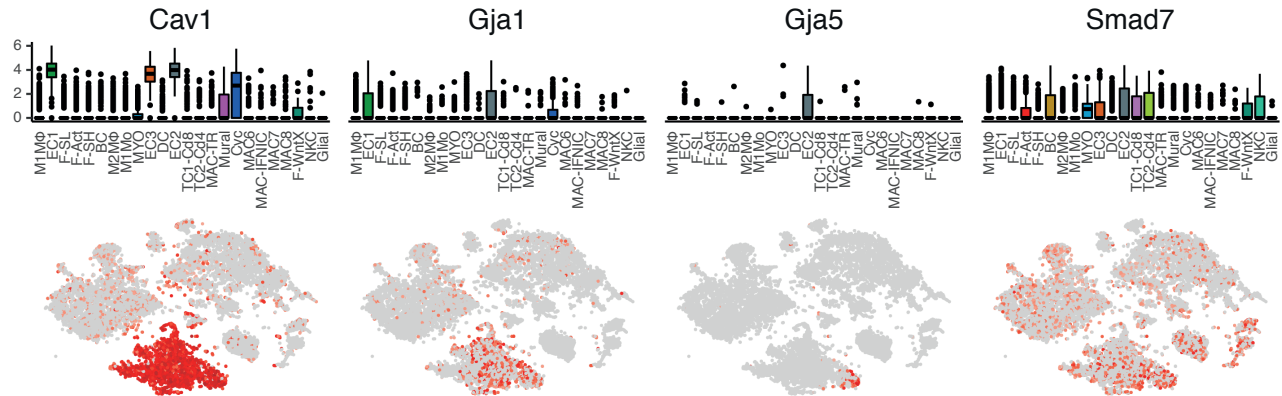

AF-associated genes up-regulated in mural cells

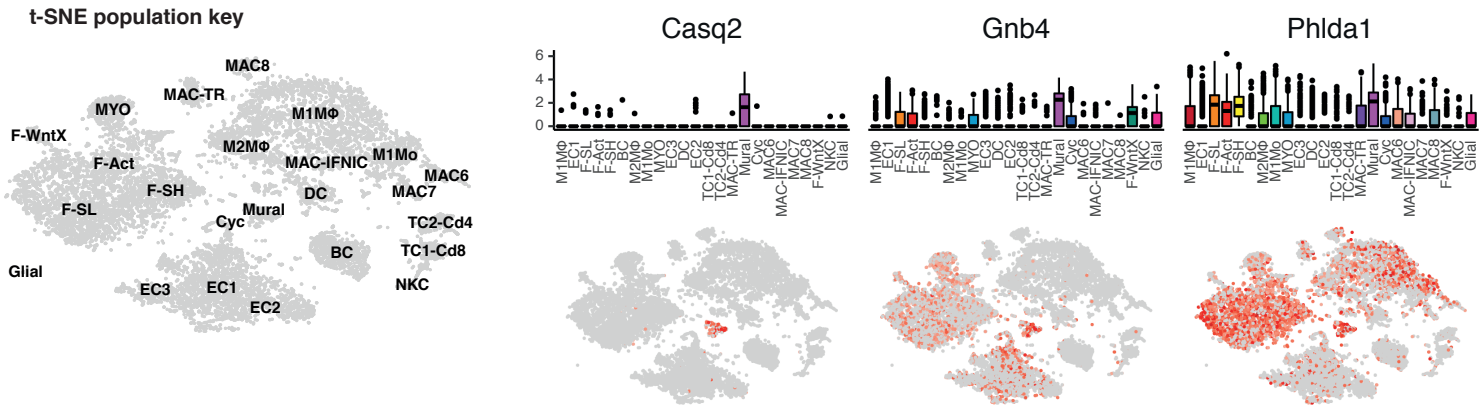

Supplement: supp [file elife-43882-supp-v1.zip › elife_poa_e43882_Figure_1_figure_supplement_8.pdf]
