# Supplementary material for: Single-cell expression profiling reveals dynamic flux of cardiac stromal, vascular and immune cells in health and injury
Source: eLife journal article supplement (doi:10.7554/elife.43882), 2019-03-26
Supplement: supp [file elife-43882-supp-v1.zip › elife_poa_e43882_Figure_1_source_data_1.xlsx]

## Sheet: Sheet1
GFP+/CD31+
	Sham	MI
Mouse 1	3.03	0.94
Mouse 2	1.68	1.19
Mouse 3	2.58	1.96
Mouse 4	2.29	1.93
Mean	2.395	1.505
SD	0.565597	0.518363
SEM	0.282799	0.259181
CD31+/CD45+
	Sham	MI
Mouse 1	0.52	6.02
Mouse 2	0.6	3.53
Mouse 3	0.56	2.57
Mean	0.56	4.04
SD	0.04	1.78065
SEM	0.023094	1.02806
CD31+/CD45+/CD206+/F480+
	Sham	MI
Mouse 1	39.4	61.3
Mouse 2	29.7	51.5
Mouse 3	37.9	67.3
Mean	35.6667	60.0333
SD	5.22143	7.9758
SEM	3.01459	4.60483
