# Supplementary material for: Single-cell expression profiling reveals dynamic flux of cardiac stromal, vascular and immune cells in health and injury
Source: eLife journal article supplement (doi:10.7554/elife.43882), 2019-03-26
Supplement: supp [file elife-43882-supp-v1.zip › elife_poa_e43882_Figure_4_source_data_1.xlsx]

## Sheet: Sheet1
Colony counts
	S+GFP+	S+GFP+CD90-high	S+GFP+CD90-low
Mouse 1	22	45	10
Mouse 2	26	55	8
Mouse 3	28	48	15
