# Supplementary material for: Single-cell expression profiling reveals dynamic flux of cardiac stromal, vascular and immune cells in health and injury
Source: eLife journal article supplement (doi:10.7554/elife.43882), 2019-03-26
Supplement: supp [file elife-43882-supp-v1.zip › elife_poa_e43882_Figure_6_source_data_1.xlsx]

## Sheet: WIF GFP
Photo	GFP	WIF	Dapi	GFP+WIF1+	%WIF+GFP+in the WIF1 fraction	%WIF+
MI D3 15 01	62	10	557	0
MI D3 15 02	80	28	492	0
MI D3 15 03	63	21	391	2
MI D3 15 04	95	13	499	0
MI D3 15 05	53	24	351	2
MI D3 15 06	46	8	342	2
MI D3 15 07	34	15	303	1
MI D3 15 08	32	21	328	0
MI D3 15 09	35	15	286	0
MI D3 15 10	23	15	378	0
TOTAL	523	170	3927	7	4.11765	4.329
MI D3 36 01	32	14	391	1
MI D3 36 02	33	12	308	1
MI D3 36 03	49	19	338	2
MI D3 36 04	52	7	267	0
MI D3 36 05	47	10	213	3
MI D3 36 06	24	12	338	0
MI D3 36 07	43	9	254	2
MI D3 36 08	56	18	531	1
MI D3 36 09	47	7	299	0
MI D3 36 10	54	9	301	1
MI D3 36 11	33	7	242	0
MI D3 36 12	51	13	416	0
MI D3 36 13	61	14	352	0
TOTAL	582	151	4250	11	7.28477	3.55294
MI D3 RaD 01	40	12	412	0
MI D3 RaD 02	10	10	467	0
MI D3 RaD 03	18	14	292	2
MI D3 RaD 04	21	6	455	0
MI D3 RaD 05	24	10	311	1
MI D3 RaD 06	18	4	241	0
MI D3 RaD 07	11	13	212	0
MI D3 RaD 08	21	5	241	1
TOTAL	163	74	2631	4	5.40541	2.81262
MI D3 49 01	45	37	343	1
MI D3 49 02	64	25	326	0
MI D3 49 03	66	24	421	1
MI D3 49 04	46	21	412	2
MI D3 49 05	45	39	455	2
MI D3 49 06	43	14	308	1
MI D3 49 07	49	20	314	1
MI D3 49 08	32	20	291	0
MI D3 49 09	51	17	390	1
MI D3 49 10	30	17	313	0
MI D3 49 11	32	16	306	1
MI D3 49 12	40	9	325	0
MI D3 49 13	56	21	414	1
MI D3 49 14	30	11	279	0
MI D3 49 15	55	23	382	0
MI D3 49 16	53	20	409	0
MI D3 49 17	25	13	445	0
MI D3 49 18	49	40	459	1
TOTAL	811	387	6592	12	3.10078	5.87075

## Sheet: Ki67
Photo	Ki67	Wif1	Ki67+Wif1+	Ki67+GFP+	%Ki67+WIF+ in Wif1 fraction
MI D3 15 01	60	11	1	15
MI D3 15 02	73	15	3	25
MI D3 15 03	11	12	2	3
MI D3 15 04	42	32	6	9
MI D3 15 05	50	21	8	23
MI D3 15 06	56	24	7	20
MI D3 15 07	45	19	5	17
MI D3 15 08	59	17	7	29
MI D3 15 09	52	14	1	22
MI D3 15 10	38	11	5	10
MI D3 15 11	55	22	4	24
MI D3 15 12	49	22	4	11
MI D3 15 13	89	30	5	39
TOTAL	679	250	58	247	23.2
MI D3 36 01	56	27	4	21
MI D3 36 02	72	15	2	24
MI D3 36 03	38	17	3	25
MI D3 36 04	36	13	0	22
MI D3 36 05	72	19	2	20
MI D3 36 06	78	19	5	14
MI D3 36 07	43	20	6	14
MI D3 36 08	45	22	3	19
MI D3 36 09	43	6	0	12
MI D3 36 10	52	26	4	22
MI D3 36 11	45	10	2	24
MI D3 36 12	61	16	3	21
MI D3 36 13	21	10	2	12
MI D3 36 14	37	15	3	17
TOTAL	699	235	39	267	16.5957
MI D3 RaD 01	24	9	2	15
MI D3 RaD 02	5	10	0	4
MI D3 RaD 03	65	5	1	22
MI D3 RaD 04	37	7	0	11
MI D3 RaD 05	38	20	2	13
TOTAL	169	51	5	65	9.80392
MI D3 49 01	137	34	0	37
MI D3 49 02	101	27	7	41
MI D3 49 03	70	12	4	33
MI D3 49 04	50	13	6	20
MI D3 49 05	55	20	8	25
MI D3 49 06	52	24	9	17
MI D3 49 07	79	40	7	15
MI D3 49 08	56	15	1	21
MI D3 49 09	44	24	5	15
MI D3 49 10	48	17	3	16
MI D3 49 11	73	21	2	22
MI D3 49 12	43	23	5	14
MI D3 49 13	85	25	2	40
MI D3 49 14	35	27	5	13
MI D3 49 15	70	30	7	23
MI D3 49 16	82	53	4	22
MI D3 49 18	94	26	7	14
MI D3 49 19	57	41	11	15
MI D3 49 20	40	21	3	20
TOTAL	1271	493	96	423	19.4726

## Sheet: CD45
Photo	Wif1	CD45	CD45+Wif1+	%CD45+WIF1+ in CD45 fraction	%CD45+WIF1+ in WIF1 fraction
MI D3 15 01	22	26	1
MI D3 15 02	15	48	5
MI D3 15 03	24	57	4
MI D3 15 04	12	18	0
MI D3 15 05	7	39	3
MI D3 15 06	16	79	1
MI D3 15 07	7	88	2
MI D3 15 08	6	31	1
MI D3 15 09	21	51	1
TOTAL	130	437	18	4.11899	13.8462
MI D3 36 01	16	31	0
MI D3 36 02	10	55	3
MI D3 36 03	15	80	1
MI D3 36 04	8	48	2
MI D3 36 05	11	77	1
MI D3 36 06	10	48	3
MI D3 36 07	4	37	0
MI D3 36 08	21	53	3
MI D3 36 09	14	49	1
MI D3 36 10	12	55	2
TOTAL	121	533	16	3.00188	13.2231
MI D3 RaD 01	10	27	0
MI D3 RaD 02	3	8	0
MI D3 RaD 03	7	28	2
MI D3 RaD 04	5	27	1
MI D3 RaD 05	4	34	2
TOTAL	29	124	5	4.03226	17.2414
MI D3 49 01	18	48	1
MI D3 49 02	15	62	2
MI D3 49 03	20	58	7
MI D3 49 04	15	61	1
MI D3 49 05	6	36	0
MI D3 49 06	11	64	1
MI D3 49 07	6	80	2
MI D3 49 08	7	45	2
MI D3 49 09	10	46	1
MI D3 49 10	13	63	1
MI D3 49 11	13	49	3
MI D3 49 12	15	87	2
TOTAL	149	699	23	3.29041	15.4362
