# Supplementary material for: Single-cell expression profiling reveals dynamic flux of cardiac stromal, vascular and immune cells in health and injury
Source: eLife journal article supplement (doi:10.7554/elife.43882), 2019-03-26
Supplement: supp [file elife-43882-supp-v1.zip › elife_poa_e43882_Supplementary_File_1.xlsx]

## Sheet: M1MФ vs rest
Gene	pct.1	pct.2	p_val_adj	Log2FoldChange
Spp1	0.889	0.198	0	4.02133
Arg1	0.562	0.047	0	3.24693
Ccl7	0.653	0.158	0	3.14242
Ccl2	0.798	0.181	0	3.02103
Pf4	0.709	0.204	0	3.01141
Hmox1	0.77	0.225	0	2.85989
Ccl6	0.936	0.238	0	2.76158
Ccl9	0.927	0.209	0	2.71626
Lgmn	0.974	0.361	0	2.65286
Cstb	0.973	0.557	0	2.5053
Cxcl2	0.782	0.176	0	2.47029
Ctsc	0.971	0.289	0	2.44554
Lgals3	0.978	0.288	0	2.40023
Ctsb	0.994	0.778	0	2.36702
Ctsd	0.981	0.698	0	2.35217
Tgfbi	0.953	0.359	0	2.34985
C5ar1	0.891	0.161	0	2.33525
Chil3	0.812	0.123	0	2.22513
Ms4a6d	0.884	0.173	0	2.19976
Ftl1	1	0.993	0	2.14777
Ctss	0.994	0.375	0	2.06366
Cd68	0.911	0.215	0	2.04775
Thbs1	0.706	0.203	0	2.03444
Fcer1g	1	0.372	0	2.02582
Cd14	0.818	0.19	0	2.00369
Cotl1	0.978	0.447	0	1.97542
Lilrb4a	0.877	0.187	0	1.97276
Fth1	1	0.992	0	1.90505
Fn1	0.851	0.333	0	1.87074
Plin2	0.836	0.369	0	1.85884
Aif1	0.816	0.165	0	1.85536
Fcgr3	0.923	0.212	0	1.84821
Dab2	0.799	0.271	0	1.84467
Ms4a6c	0.917	0.22	0	1.84156
Maf	0.723	0.12	0	1.83933
Msr1	0.715	0.09	0	1.83773
Lyz2	1	0.595	0	1.83475
Ccr2	0.842	0.177	0	1.83057
Clec4n	0.569	0.105	0	1.80685
Cfp	0.764	0.143	0	1.78892
Mafb	0.856	0.305	0	1.77453
Alox5ap	0.953	0.262	0	1.74343
Rgs1	0.514	0.115	0	1.73746
Actb	1	0.997	0	1.71886
Clec4a2	0.745	0.147	0	1.69472
Tyrobp	1	0.381	0	1.69273
Pkm	0.959	0.748	0	1.68393
Fcgr2b	0.8	0.182	0	1.67804
Clec4d	0.606	0.085	0	1.65079
Ccr1	0.709	0.119	0	1.6395
Fcgr1	0.731	0.139	0	1.62981
Ms4a7	0.706	0.132	0	1.61556
Srgn	0.952	0.573	0	1.59877
Lst1	0.883	0.241	0	1.58572
F13a1	0.669	0.11	0	1.56436
C1qb	0.661	0.24	0	1.56405
Wfdc17	0.934	0.278	0	1.55975
Psap	0.995	0.869	0	1.53795
Efhd2	0.879	0.34	0	1.53129
Sdcbp	0.958	0.646	0	1.53064
Eno1	0.895	0.582	0	1.50809
Osm	0.475	0.084	0	1.50807
Trem2	0.693	0.131	0	1.5031
C3ar1	0.701	0.121	0	1.49495
Pla2g7	0.657	0.132	0	1.48888
Capg	0.864	0.501	0	1.48249
Lilr4b	0.672	0.13	0	1.48076
S100a4	0.887	0.325	0	1.47632
AF251705	0.787	0.174	0	1.47353
Mpeg1	0.782	0.184	0	1.46869
Aprt	0.854	0.442	0	1.46803
Il1b	0.715	0.205	0	1.46559
Metrnl	0.788	0.289	0	1.44889
Grn	0.894	0.575	0	1.43512
Cyba	0.994	0.804	0	1.43275
Plek	0.719	0.182	0	1.42989
Ier3	0.778	0.373	0	1.42313
Ninj1	0.704	0.298	0	1.40278
Pid1	0.838	0.388	0	1.39877
Gm2a	0.883	0.435	0	1.3912
Mt1	0.868	0.49	0	1.39006
Sirpb1c	0.653	0.134	0	1.3839
Tpd52	0.848	0.266	0	1.37079
Ms4a6b	0.745	0.216	0	1.34259
Itgb2	0.738	0.206	0	1.33658
Cd53	0.904	0.345	0	1.33036
Fyb	0.795	0.234	0	1.32528
Slc11a1	0.617	0.119	0	1.32487
Itgam	0.639	0.126	0	1.32419
Lcp1	0.868	0.302	0	1.31828
Ctsh	0.883	0.362	0	1.29836
Apoe	0.987	0.852	0	1.29639
Adam8	0.506	0.065	0	1.2872
Mif	0.849	0.596	0	1.27957
Tpi1	0.803	0.512	0	1.27167
Pfn1	0.997	0.933	0	1.26547
Gapdh	0.979	0.873	0	1.26349
Basp1	0.548	0.137	0	1.25833
Laptm5	0.915	0.335	0	1.2531
C1qc	0.602	0.194	0	1.25013
Ifi30	0.817	0.313	0	1.24806
Sdf2l1	0.693	0.306	0	1.24762
Dok2	0.53	0.076	0	1.23647
Bcl2a1b	0.612	0.157	0	1.22589
Pilra	0.552	0.105	0	1.22067
Glrx	0.545	0.157	0	1.1814
P2ry6	0.618	0.142	0	1.17402
Pitpna	0.833	0.451	0	1.1727
Ctsz	0.937	0.685	0	1.17102
AI662270	0.653	0.168	0	1.1596
Pgam1	0.802	0.538	0	1.15616
Fam105a	0.663	0.185	0	1.14829
Csf1r	0.734	0.197	0	1.13486
Spi1	0.824	0.251	0	1.13016
Cndp2	0.666	0.296	0	1.1237
Arpc1b	0.998	0.913	0	1.12111
Ctsa	0.789	0.412	0	1.11877
Prdx5	0.907	0.609	0	1.11624
Cd52	0.98	0.438	0	1.11197
Lat2	0.585	0.147	0	1.10773
Gm10116	0.802	0.429	0	1.1062
Fam49b	0.812	0.341	0	1.1059
Tmsb4x	1	1	0	1.10465
Sirpa	0.653	0.223	0	1.10121
Clec4e	0.471	0.089	0	1.09784
Aldoa	0.941	0.815	0	1.08502
Clec4a3	0.625	0.165	0	1.07988
Stab1	0.539	0.132	0	1.07917
Zeb2	0.804	0.45	0	1.07705
Actr2	0.846	0.479	0	1.06975
Slc15a3	0.525	0.122	0	1.06906
Clta	0.949	0.778	0	1.06613
Nrros	0.634	0.179	0	1.05909
Tmem106a	0.539	0.15	0	1.05661
Csf2ra	0.565	0.146	0	1.04768
Clec4a1	0.565	0.147	0	1.04159
Prdx1	0.966	0.888	0	1.03764
Emb	0.608	0.17	0	1.0289
Arpc5	0.935	0.699	0	1.02216
Rbm47	0.441	0.072	0	1.02185
Arpc2	0.977	0.859	0	1.0181
Rab20	0.451	0.079	0	1.01324
Gpx1	0.974	0.767	0	1.00178
Adgre1	0.552	0.14	0	0.988143
Arpc4	0.857	0.557	0	0.978712
Lrrc25	0.537	0.136	0	0.971691
Ncf2	0.639	0.191	0	0.950807
Fxyd5	0.941	0.664	0	0.934768
Rap1b	0.897	0.693	0	0.923886
Capza2	0.892	0.666	0	0.922759
Sh3bgrl3	0.988	0.851	0	0.918218
Cfl1	0.992	0.944	0	0.912809
Npc2	0.955	0.778	0	0.869537
Lamp1	0.959	0.815	0	0.833803
Hspa8	0.992	0.972	0	0.817343
Coro1a	0.873	0.382	0	0.759536
Calm1	0.99	0.954	0	0.662292
Rps4x	0.986	0.991	0	-0.759849
Rps12	0.965	0.982	0	-0.787969
Rps21	0.954	0.985	0	-0.845151
Rps15	0.975	0.993	0	-0.858887
Rplp1	0.995	0.996	0	-0.875565
Rpl13a	0.995	0.995	0	-0.879973
Rabac1	0.529	0.799	0	-1.09177
Laptm4a	0.665	0.83	0	-1.12741
Npdc1	0.013	0.396	0	-1.17299
Cnn3	0.035	0.442	0	-1.27119
Mxra8	0.008	0.367	0	-1.33196
Jund	0.651	0.84	0	-1.36606
Ppic	0.016	0.414	0	-1.38018
Gnas	0.792	0.936	0	-1.39049
Serpinb6a	0.11	0.537	0	-1.41444
Fermt2	0.016	0.439	0	-1.41866
Plpp1	0.02	0.418	0	-1.44647
Gpm6b	0.006	0.344	0	-1.455
Entpd2	0.005	0.35	0	-1.46747
Rhoj	0.01	0.431	0	-1.47072
Mfge8	0.049	0.456	0	-1.48593
Nedd4	0.019	0.471	0	-1.49404
Ddah2	0.043	0.475	0	-1.49798
Col15a1	0.018	0.385	0	-1.50565
Hspg2	0.022	0.469	0	-1.50919
Prelp	0.005	0.362	0	-1.51686
Sdc2	0.008	0.371	0	-1.51826
Slc43a3	0.023	0.438	0	-1.51959
Col6a2	0.008	0.37	0	-1.54293
Fxyd1	0.005	0.379	0	-1.55434
Fxyd6	0.014	0.396	0	-1.55728
Col4a2	0.033	0.443	0	-1.56161
Nfib	0.022	0.494	0	-1.59037
Rhoc	0.168	0.581	0	-1.60193
Rcn3	0.021	0.402	0	-1.62315
Tcf4	0.34	0.711	0	-1.69162
Mmp2	0.013	0.383	0	-1.71044
Nid1	0.017	0.442	0	-1.73739
Pmp22	0.096	0.469	0	-1.7401
Col6a1	0.006	0.393	0	-1.7836
Eng	0.054	0.477	0	-1.82325
Col4a1	0.042	0.518	0	-1.8271
Slc9a3r2	0.029	0.398	0	-1.84444
Selm	0.073	0.555	0	-1.85078
Ptrf	0.038	0.518	0	-1.86535
Loxl1	0.022	0.4	0	-1.8807
Crispld2	0.005	0.361	0	-1.91025
Cald1	0.028	0.527	0	-1.92011
Timp3	0.034	0.487	0	-1.94657
Serpinf1	0.021	0.4	0	-1.94871
Prkcdbp	0.029	0.534	0	-1.94882
Gas1	0.004	0.366	0	-1.95196
Ramp2	0.029	0.513	0	-1.97632
Lhfp	0.011	0.425	0	-1.98948
Plpp3	0.025	0.512	0	-1.99083
Fbln1	0.01	0.366	0	-2.01564
Ogn	0.011	0.374	0	-2.02106
S100a16	0.031	0.574	0	-2.02649
Rbp1	0.018	0.414	0	-2.04428
Rarres2	0.01	0.426	0	-2.07385
Fbln2	0.018	0.449	0	-2.09516
Sptbn1	0.104	0.655	0	-2.15241
Cygb	0.009	0.41	0	-2.15422
Ltbp4	0.031	0.568	0	-2.17201
Dpt	0.016	0.418	0	-2.22183
Zbtb20	0.096	0.624	0	-2.24644
Ebf1	0.017	0.571	0	-2.26764
Tuba1a	0.35	0.767	0	-2.2805
Gstm1	0.167	0.595	0	-2.29029
Fstl1	0.026	0.438	0	-2.31588
Igfbp4	0.113	0.515	0	-2.3571
Hspb1	0.068	0.574	0	-2.37393
Id3	0.162	0.645	0	-2.43148
Pcolce	0.035	0.475	0	-2.43932
Smoc2	0.015	0.389	0	-2.45025
Htra3	0.057	0.446	0	-2.56786
Ccdc80	0.046	0.462	0	-2.56815
Ly6a	0.246	0.665	0	-2.57894
Pi16	0.061	0.457	0	-2.60395
Cd34	0.039	0.605	0	-2.61932
Cd81	0.302	0.803	0	-2.64724
Crip2	0.05	0.653	0	-2.66282
Mfap5	0.034	0.445	0	-2.67798
Clec3b	0.008	0.37	0	-2.69763
Sparcl1	0.057	0.615	0	-2.73397
Gng11	0.085	0.608	0	-2.73957
Tm4sf1	0.079	0.593	0	-2.74611
Serping1	0.019	0.453	0	-2.74658
Gpx3	0.058	0.466	0	-2.78912
Col1a1	0.034	0.414	0	-2.82281
Lum	0.05	0.482	0	-2.92626
Serpinh1	0.089	0.654	0	-2.94997
Ly6c1	0.112	0.51	0	-3.02066
Col1a2	0.039	0.463	0	-3.0511
Col3a1	0.076	0.529	0	-3.38329
Bgn	0.067	0.536	0	-3.61746
Sparc	0.163	0.752	0	-4.1954
Fabp4	0.348	0.75	0	-4.30248
Igfbp7	0.236	0.803	0	-4.39398
Gsn	0.726	0.825	0	-4.43836
Mgp	0.155	0.725	0	-4.75522
Dcn	0.165	0.699	0	-5.49211
Nme1	0.813	0.551	7.7439849329157e-320	0.952119
Cd48	0.645	0.215	1.16159773993735e-318	1.0298
Meg3	0.006	0.341	9.68772515107754e-317	-2.08044
Eif4a1	0.943	0.846	1.08253165377229e-315	0.836626
Ldha	0.908	0.782	1.80255962884985e-314	0.988577
Rab3il1	0.548	0.208	2.15515100683044e-314	0.989943
Akr1a1	0.911	0.743	4.32963332324892e-313	0.84628
Rgs2	0.717	0.278	6.27091993722461e-312	1.08808
Ptafr	0.456	0.093	8.15116404788765e-312	1.06964
Mxra7	0.01	0.348	1.73260729141662e-311	-1.02328
Rpl21	0.985	0.995	1.29349149161268e-310	-0.720898
Pycard	0.714	0.31	3.4681717117613e-310	1.02175
Adamts5	0.005	0.331	1.45513917538254e-309	-1.58261
Rps20	0.971	0.982	3.01579193751161e-309	-0.837314
Adssl1	0.442	0.09	2.04699909706087e-308	0.956738
Ucp2	0.79	0.353	7.70783770221765e-308	0.934249
Rpl30	0.949	0.972	6.61834e-307	-0.790457
Gm5150	0.397	0.064	3.39389e-306	0.883092
Shfm1	0.974	0.879	7.68102e-305	0.68947
Camk2n1	0.004	0.327	1.05606e-302	-1.25586
Skap2	0.656	0.238	2.12615e-302	0.944525
Nenf	0.229	0.562	3.19043e-302	-1.25983
Actr3	0.911	0.668	3.22786e-302	0.840158
Cxcl12	0.049	0.403	5.77586e-302	-2.47501
Heg1	0.02	0.367	2.29251e-301	-1.09482
AI607873	0.588	0.189	1.23698e-300	1.00815
Ptgis	0.008	0.337	1.68842e-300	-1.28371
Fkbp9	0.015	0.353	4.19738e-300	-1.00102
Atp6v0b	0.873	0.624	6.27509e-300	0.851465
Serpine2	0.018	0.355	1.04735e-299	-1.54807
Fbn1	0.016	0.349	2.07202e-299	-1.42463
Fam96a	0.724	0.363	2.65026e-299	0.975628
Ccl12	0.4	0.071	7.60157e-299	1.63574
Cyth4	0.586	0.178	8.88636e-299	0.915566
Nfia	0.03	0.387	1.34223e-298	-1.25123
Slfn2	0.753	0.326	1.36895e-298	0.89398
Eva1b	0.105	0.49	7.05509e-298	-1.1995
Dpep1	0.01	0.335	7.9072e-298	-1.97519
Pld4	0.621	0.208	2.747e-297	0.861861
Mast4	0.007	0.33	6.8839e-297	-1.01549
Pirb	0.566	0.167	2.59886e-296	0.90374
Pdlim1	0.062	0.432	2.62272e-296	-1.2272
Socs2	0.035	0.392	3.53259e-294	-1.18935
Emilin2	0.57	0.176	1.36351e-293	0.947358
Pls3	0.025	0.367	5.14216e-293	-1.14911
Pcolce2	0.006	0.32	4.33953e-291	-1.44529
Ccr5	0.475	0.113	4.12071e-290	0.944982
Islr	0.002	0.31	2.14969e-289	-1.2631
H2B-EGFP	0	0.303	2.77161e-289	-1.21452
Abca8a	0.008	0.325	2.31814e-287	-1.28456
Hmgn1	0.189	0.562	5.47335e-287	-1.20146
Ehd2	0.019	0.352	5.41827e-286	-1.14248
Rab7b	0.549	0.197	1.28182e-284	0.960665
Oaf	0.026	0.357	4.3304e-284	-1.32685
Rap2b	0.543	0.202	1.81661e-283	1.00287
Cfh	0.12	0.438	1.70343e-282	-1.86431
Lamc1	0.07	0.412	1.01643e-281	-1.33907
Sdpr	0.04	0.367	2.06963e-281	-2.36914
Cd84	0.507	0.135	1.82896e-280	0.914402
C1qa	0.583	0.211	2.58517e-280	1.20755
Plat	0.008	0.32	3.05799e-280	-1.03717
Rpl7	0.973	0.985	6.97201e-280	-0.642429
Sod3	0.01	0.321	1.09197e-279	-1.16585
Pcsk6	0.001	0.297	2.22748e-279	-1.15673
Fbln5	0.008	0.315	9.28315e-279	-1.24143
Slc25a4	0.401	0.695	1.13e-278	-1.11059
Rnf149	0.632	0.246	8.34893e-278	0.938798
Jup	0.032	0.37	2.7431e-277	-1.07681
Aspn	0.01	0.318	5.60212e-277	-1.80323
Copz2	0.023	0.349	3.16614e-276	-0.960605
Ptpn18	0.788	0.372	4.20606e-276	0.839092
Pabpc1	0.95	0.791	1.4479e-275	0.795823
Bicc1	0.005	0.306	3.8957e-275	-1.03493
Snhg18	0.008	0.314	4.42532e-275	-1.07426
Adap2os	0.495	0.14	6.92716e-275	0.945667
Cyb5a	0.411	0.711	9.02667e-275	-1.13993
Eln	0.009	0.312	1.95982e-273	-1.83899
Fcgr4	0.433	0.096	2.46467e-273	0.877329
Gpx8	0.006	0.307	1.86949e-272	-0.935106
Fgfr1	0.003	0.298	5.46227e-272	-0.844184
Lims2	0.022	0.34	1.82782e-271	-1.4506
Cd44	0.618	0.227	3.05196e-271	0.984932
Arhgdib	0.879	0.543	1.19702e-270	0.680792
Akap12	0.01	0.314	3.08363e-270	-0.989625
Klf2	0.611	0.83	3.44449e-270	-1.60335
Tuba1c	0.566	0.197	4.51615e-270	0.927774
Mgll	0.031	0.346	9.69076e-270	-2.14264
Sept4	0.007	0.308	4.90334e-269	-1.36529
Gpr65	0.442	0.104	2.2724e-266	0.909745
Medag	0.005	0.3	4.96551e-266	-1.04579
Plbd1	0.514	0.148	8.90675e-266	0.883206
Mrc1	0.388	0.077	1.1052e-265	1.07477
Gda	0.615	0.237	3.13295e-265	0.988711
Cp	0.002	0.287	9.36632e-265	-1.0833
Lamb1	0.01	0.307	2.70995e-264	-0.991927
H3f3b	0.996	0.985	1.15318e-263	0.646818
Cap1	0.602	0.236	4.8028e-263	0.894206
Rab32	0.431	0.107	8.73696e-263	0.870183
Lgals1	0.976	0.766	3.20056e-262	0.629527
Fhl1	0.004	0.293	3.88373e-262	-0.954834
Slc16a3	0.445	0.123	5.05197e-262	1.08744
Gimap6	0.033	0.341	8.30296e-262	-1.5589
Tnxb	0.002	0.287	8.47935e-262	-1.09161
Vwa1	0.061	0.397	5.22156e-261	-1.21583
Cd200	0.029	0.332	1.3016e-260	-1.63328
Ltb4r1	0.37	0.067	9.00234e-260	0.907983
Fkbp7	0.025	0.339	1.06445e-259	-0.953583
Eef2	0.898	0.959	2.4472e-259	-0.729414
Bst1	0.368	0.068	3.77167e-259	0.810797
Aebp1	0.005	0.292	5.68986e-259	-1.0394
Meox1	0.015	0.313	1.03546e-258	-1.27168
Lpxn	0.444	0.109	1.90516e-258	0.813024
Col8a1	0.019	0.32	2.52829e-258	-1.73327
Lair1	0.447	0.11	4.8613e-257	0.864843
Ly86	0.599	0.215	1.24074e-255	0.83708
Hexa	0.797	0.52	3.67102e-255	0.912442
Ablim1	0.016	0.316	4.13581e-255	-0.987882
Hcls1	0.637	0.244	1.80242e-254	0.845831
Cdc42	0.954	0.885	3.52263e-254	0.623446
Cyr61	0.011	0.303	4.91805e-254	-1.73913
Ace	0.018	0.323	1.51574e-252	-1.04258
Card19	0.666	0.341	3.83073e-252	0.975575
Dpep2	0.404	0.089	1.06461e-251	0.848376
Sgce	0.006	0.289	7.30321e-251	-0.805872
Sdc4	0.539	0.258	1.01182e-250	1.11386
Gusb	0.664	0.336	3.41625e-250	0.899438
Gm10073	0.652	0.808	7.08488e-250	-0.959696
Slc7a8	0.29	0.039	3.75818e-249	0.662533
4930523C07Rik	0.088	0.431	1.80271e-248	-1.15603
Gm6377	0.396	0.088	1.87635e-248	0.87684
Ets1	0.043	0.356	4.2342e-248	-1.24799
Rcn1	0.021	0.322	1.11587e-247	-0.871071
Lama2	0.004	0.28	4.11603e-247	-0.878911
Zeb1	0.015	0.31	6.59991e-247	-0.864329
Adamts2	0.007	0.284	6.88442e-247	-0.964752
Ms4a4d	0.001	0.269	1.25862e-246	-1.00049
Htra1	0.009	0.292	4.56395e-246	-0.984613
Snx5	0.726	0.389	5.28137e-246	0.879216
Ifngr2	0.675	0.339	2.8614e-245	0.876256
Rab5c	0.778	0.511	8.65237e-245	0.825497
Ncf4	0.548	0.182	2.70728e-243	0.831987
Ecm2	0.004	0.275	1.43007e-242	-0.85895
Prelid1	0.818	0.584	1.50112e-242	0.799499
Fibin	0.006	0.278	1.62504e-241	-1.1665
Ndufa4l2	0.003	0.267	8.67832e-241	-1.29714
Rpl31	0.974	0.985	3.99756e-240	-0.625719
Fos	0.975	0.811	4.85101e-240	0.671263
Prss23	0.004	0.272	1.58176e-239	-1.07659
Sirpb1b	0.408	0.097	5.45652e-239	0.749368
Gpihbp1	0.066	0.353	1.31465e-238	-2.40101
Nbl1	0.004	0.27	1.88731e-238	-1.14172
Lama4	0.014	0.303	3.22398e-238	-0.841746
Atp2b1	0.77	0.451	1.22308e-237	0.849547
Amotl1	0.008	0.283	2.45207e-237	-0.791031
mt-Nd2	0.892	0.957	9.54154e-236	-0.779925
Aldh1a1	0.003	0.264	2.48068e-235	-0.986736
Col5a2	0.007	0.276	9.06655e-235	-1.10952
Rps24	0.992	0.991	1.66421e-233	-0.740579
Pdlim2	0.092	0.408	1.71041e-233	-1.16529
Cpq	0.044	0.344	7.95188e-233	-1.02672
AB124611	0.544	0.185	3.98128e-232	0.758262
Tm6sf1	0.61	0.236	4.38845e-232	0.776279
Evi2a	0.539	0.183	1.27535e-231	0.763769
Ptpn6	0.593	0.226	1.70109e-231	0.749315
Plaur	0.467	0.134	2.74762e-231	0.954954
Plxdc2	0.018	0.299	3.10818e-231	-0.932807
Ostf1	0.892	0.696	8.46561e-231	0.709958
Tnfaip8	0.65	0.293	9.89394e-231	0.859312
Nt5dc2	0.364	0.088	3.53719e-230	0.851693
Phlda3	0.046	0.355	3.59191e-230	-1.04622
Mmp23	0.005	0.268	4.72481e-230	-0.836302
Gstm2	0.006	0.271	4.28519e-229	-0.790798
Tmem204	0.01	0.277	1.14079e-228	-0.914219
Arrb2	0.518	0.174	1.30572e-228	0.800807
Tsc22d1	0.08	0.392	1.52968e-228	-1.17189
Cav1	0.078	0.357	1.13242e-227	-2.0961
Slc37a2	0.282	0.044	1.53291e-227	0.648554
Dpysl3	0.01	0.279	1.5806e-226	-0.793957
Txnip	0.274	0.604	2.01434e-226	-1.13725
Tgfb1i1	0.009	0.273	2.58647e-226	-0.770694
G0s2	0.053	0.355	3.39314e-226	-1.61424
Fcgrt	0.158	0.51	8.1878e-226	-1.02351
AW112010	0.169	0.468	1.08873e-225	-1.61729
Unc93b1	0.72	0.353	1.30598e-225	0.801752
Ifi27	0.278	0.59	1.74911e-225	-1.05707
Angptl2	0.014	0.285	1.84632e-224	-0.959113
Wwtr1	0.009	0.272	1.72447e-223	-0.804785
Cd55	0.007	0.262	4.72554e-222	-0.930247
Rpl12	0.878	0.927	6.28099e-222	-0.888961
Klf9	0.122	0.444	7.52952e-222	-1.10059
Nxpe5	0.263	0.035	5.5455e-221	0.617797
Esam	0.04	0.297	8.41593e-221	-1.76617
Nfix	0.043	0.343	1.50131e-220	-0.942092
Soat1	0.477	0.178	1.75795e-220	0.845383
Prnp	0.035	0.322	1.92837e-220	-0.956022
Cd300ld	0.391	0.094	5.27476e-220	0.744784
Spry1	0.008	0.263	7.76774e-220	-0.835298
Msrb1	0.723	0.388	9.71803e-220	0.619847
Thra	0.05	0.353	1.16115e-219	-0.883941
Mtch1	0.36	0.6	3.47592e-219	-1.02102
Fermt3	0.473	0.147	4.49474e-219	0.786214
Gpx7	0.013	0.28	1.25855e-218	-0.780739
Kdelr3	0.013	0.281	1.29605e-218	-0.833061
Gna11	0.054	0.359	4.76486e-218	-0.885821
Myo1f	0.446	0.131	6.23172e-218	0.765031
Cyp4f18	0.454	0.132	3.33696e-217	0.807493
Rpl18a	0.998	0.998	4.0517e-217	-0.637901
Col6a3	0.006	0.256	6.45075e-217	-0.923592
Hck	0.46	0.137	1.60422e-216	0.721689
Ndrg2	0.004	0.251	3.67786e-216	-0.798013
Rgs10	0.72	0.381	4.79798e-216	0.746859
Snx2	0.653	0.362	5.11112e-216	0.870752
Egfl7	0.048	0.308	7.12428e-216	-1.9394
Slc25a5	0.891	0.724	2.5679e-215	0.69922
Creg1	0.669	0.404	2.87075e-215	0.883599
Atox1	0.951	0.803	8.76083e-215	0.641363
Malat1	0.999	0.998	1.7566e-214	-0.743656
F2r	0.009	0.263	4.04934e-214	-0.788153
Rpl28	0.972	0.976	2.58211e-213	-0.557862
Mcl1	0.8	0.501	7.72097e-213	0.818717
Tshz2	0.015	0.278	8.93314e-213	-1.00759
Cd151	0.164	0.475	1.38918e-212	-1.0669
Arl4c	0.551	0.207	6.8608e-212	0.815464
Vsir	0.628	0.278	1.14219e-211	0.831675
Lzts2	0.008	0.259	4.21234e-211	-0.691088
Fam101b	0.017	0.269	7.57367e-211	-1.20047
Aes	0.277	0.579	1.53765e-210	-0.949219
Cmtm7	0.713	0.424	1.03643e-209	0.82108
Btg1	0.946	0.766	1.36106e-209	0.702938
Cryab	0.031	0.304	1.78622e-209	-0.978404
Atf5	0.042	0.31	2.72364e-209	-1.14245
Pecam1	0.048	0.302	1.04987e-208	-1.47685
Timp2	0.329	0.551	2.64869e-208	-1.26815
Picalm	0.713	0.413	9.67005e-208	0.822841
Dusp1	0.908	0.725	1.21284e-207	0.912688
Jam2	0.025	0.286	3.94561e-207	-1.06712
Pgd	0.543	0.242	8.67418e-207	0.826488
Dlc1	0.016	0.272	3.87769e-206	-0.825593
Ccl3	0.413	0.117	7.47647e-206	0.964039
Tspan13	0.169	0.418	1.14419e-205	-1.67871
Lpar1	0.009	0.255	1.39196e-204	-0.736486
Ccl4	0.466	0.153	3.48841e-204	1.25199
Zeb2os	0.386	0.111	9.16855e-204	0.748019
Matn2	0.01	0.255	1.7753e-203	-0.813208
Hspa5	0.896	0.771	1.957e-203	0.871174
Gnpda1	0.381	0.106	2.13966e-203	0.710207
Iqgap1	0.793	0.534	3.2459e-203	0.797559
Gng5	0.97	0.875	2.1376e-202	0.573231
Emp2	0.011	0.258	6.61379e-202	-0.788046
Tpm3	0.895	0.745	8.05308e-202	0.672956
Slc50a1	0.131	0.446	9.54802e-202	-0.897879
Cdkn1c	0.016	0.268	1.32587e-201	-1.14194
mt-Cytb	0.978	0.992	4.97493e-201	-0.546759
Tnfaip8l2	0.503	0.175	1.03373e-199	0.752518
Bax	0.791	0.563	2.64139e-199	0.765911
Irf5	0.532	0.199	6.08088e-199	0.742532
Plac8	0.55	0.22	1.25651e-198	0.721354
Slc3a2	0.71	0.431	2.55595e-198	0.797334
Vkorc1	0.136	0.433	6.57651e-198	-0.915543
Pim1	0.68	0.334	6.88136e-198	0.89619
H2afv	0.21	0.541	8.13775e-198	-0.881341
Ap2s1	0.752	0.543	1.05639e-197	0.700756
Gabarap	0.956	0.852	1.8323e-197	0.5913
Rbpj	0.525	0.243	2.93477e-197	0.802015
Cd9	0.361	0.668	6.4422e-197	-1.16562
Il10rb	0.69	0.375	1.29105e-196	0.790433
Tbrg1	0.157	0.467	1.37996e-196	-0.896265
Cxx1a	0.061	0.338	4.0065e-196	-0.92353
Maged1	0.019	0.272	8.83664e-196	-0.720495
Smco4	0.049	0.316	9.99535e-195	-1.00242
Cst3	0.987	0.948	1.894e-194	-0.705165
Icam2	0.082	0.305	9.77145e-194	-1.49878
Pam	0.137	0.409	2.03715e-193	-1.3247
Cox7a2l	0.636	0.829	2.72492e-193	-0.784533
Vamp5	0.031	0.296	4.43596e-193	-0.829168
Mfsd1	0.505	0.209	5.43648e-193	0.765326
Ahnak2	0.017	0.265	8.62171e-193	-0.793735
Epas1	0.02	0.267	9.08474e-193	-0.989595
Fscn1	0.018	0.262	1.05713e-192	-1.03216
Fam198b	0.021	0.271	2.3009e-192	-0.789359
P3h3	0.018	0.265	1.78356e-191	-0.708176
Mrpl52	0.858	0.674	2.95559e-191	0.697733
Axl	0.116	0.407	1.96256e-190	-1.14777
Emcn	0.033	0.266	2.99794e-190	-1.56699
Il1rn	0.269	0.045	5.03078e-190	0.838224
Gimap4	0.026	0.261	1.42492e-189	-1.1786
Hif1a	0.543	0.247	1.93453e-189	0.859123
Slc43a2	0.313	0.07	4.46526e-189	0.652218
Litaf	0.717	0.447	1.33787e-188	0.76793
Cyfip1	0.59	0.296	3.01949e-188	0.755498
Rora	0.021	0.268	3.27114e-188	-0.728225
Aplp2	0.354	0.582	7.48177e-188	-1.00628
S100a8	0.55	0.309	9.43781e-188	-1.46561
Tmem37	0.338	0.08	2.739e-187	0.722894
Cd86	0.412	0.124	5.11566e-187	0.715037
Nr4a2	0.347	0.093	1.07577e-186	0.871386
Ncf1	0.431	0.136	2.43103e-186	0.673831
Ecscr	0.032	0.259	9.54931e-186	-1.36643
Tmem59	0.607	0.774	5.54946e-185	-0.775038
Tpm1	0.146	0.434	6.7538e-185	-1.01646
Cdh5	0.04	0.277	1.49699e-184	-1.58003
Tbxas1	0.314	0.071	1.02804e-182	0.616707
Lyn	0.647	0.306	1.10586e-182	0.675109
Ms4a4c	0.451	0.153	2.34457e-182	0.817682
Pla2g16	0.032	0.282	4.30804e-182	-0.72849
Tlr2	0.415	0.131	2.54168e-181	0.76615
Fuca2	0.377	0.109	2.68216e-181	0.670165
Rps27	1	0.999	8.23948e-181	-0.513353
Ptms	0.417	0.646	4.80724e-180	-0.896334
Ccdc109b	0.531	0.228	7.28223e-180	0.734868
Ifi204	0.514	0.209	1.68665e-179	0.802953
Atp1a1	0.684	0.394	1.76036e-179	0.766862
Sepw1	0.704	0.824	2.53925e-179	-0.732949
Igsf6	0.377	0.107	4.34833e-179	0.651643
Prdx6	0.63	0.476	1.1793e-178	0.836214
Arpc3	0.929	0.833	7.99581e-178	0.522552
Rras	0.089	0.374	2.65363e-177	-0.807763
Eef1a1	0.998	0.998	4.22398e-175	-0.504722
Por	0.511	0.242	4.88211e-174	0.814022
Lpl	0.237	0.538	5.5395e-173	-1.27801
Ccser2	0.052	0.312	7.13163e-173	-0.763276
Capzb	0.888	0.739	1.21494e-172	0.606588
Map1lc3a	0.169	0.455	5.73107e-172	-0.866269
Ptpn1	0.676	0.37	2.36094e-171	0.719726
Pxdc1	0.022	0.256	6.0105e-171	-0.681561
Apobec1	0.444	0.155	1.7781e-170	0.67887
Dst	0.027	0.267	7.71948e-170	-0.663404
Tpst1	0.085	0.357	5.1525e-169	-0.789185
Hes1	0.124	0.425	9.26812e-169	-1.06567
M6pr	0.642	0.365	9.68613e-169	0.710889
F10	0.279	0.056	1.39989e-168	0.816073
Bin2	0.444	0.156	2.66674e-168	0.658833
Csrp1	0.15	0.43	5.4013e-167	-0.919944
Aldh3b1	0.365	0.109	6.07144e-167	0.632806
Fkbp1a	0.706	0.802	8.29293e-167	-0.789454
Nceh1	0.315	0.08	5.33883e-166	0.653408
Atf3	0.601	0.288	1.37024e-165	0.825179
Tubb4b	0.334	0.533	3.31719e-165	-0.932263
Bmp2k	0.383	0.126	3.44838e-165	0.732376
Vamp8	0.793	0.548	2.4545e-164	0.640819
Il11ra1	0.101	0.354	6.14201e-164	-0.907787
Clic1	0.929	0.84	1.1976e-163	0.510814
Tma7	0.887	0.726	3.95648e-163	0.607325
Rnpep	0.565	0.282	8.95045e-163	0.718819
Tns1	0.033	0.267	2.53748e-162	-0.742507
Tlr13	0.256	0.05	1.30666e-161	0.508305
Inpp5d	0.409	0.136	1.19311e-160	0.636362
S100a9	0.396	0.232	2.47276e-160	-1.66893
Atp6v0e	0.886	0.753	2.32592e-158	0.571402
Trib1	0.434	0.157	1.10963e-157	0.704063
Sec62	0.546	0.733	1.28058e-157	-0.746284
Aqp1	0.069	0.28	1.44021e-157	-2.15822
Rps5	0.992	0.993	2.10327e-157	-0.524872
Gas6	0.167	0.461	2.28498e-157	-1.03431
Cdkn1a	0.748	0.444	2.64095e-157	0.691799
Cyth3	0.066	0.32	5.80085e-157	-0.733465
Cd300lf	0.257	0.052	6.37326e-157	0.583734
Ctsl	0.871	0.724	8.53455e-157	0.861611
Cd36	0.267	0.386	5.80613e-156	-1.75698
Clec12a	0.411	0.14	6.03636e-156	0.724644
Ctla2a	0.057	0.27	8.4023e-156	-1.47258
Csrp2	0.068	0.298	1.25888e-155	-1.03693
Slc29a1	0.126	0.389	1.63372e-155	-0.798441
Cdc42ep2	0.053	0.297	1.72449e-155	-0.772694
Ppt1	0.656	0.391	3.58069e-155	0.696408
Cebpa	0.386	0.144	1.90864e-154	0.70514
Nav1	0.102	0.36	1.06329e-153	-0.782503
Uap1l1	0.38	0.16	1.35373e-153	0.654093
Calu	0.177	0.43	1.91904e-153	-0.810165
Eif4a2	0.437	0.676	2.14239e-153	-0.766786
Arhgap30	0.467	0.182	2.52164e-153	0.613012
Rpl23	0.995	0.992	5.92886e-153	-0.518998
Cxcl16	0.593	0.31	8.93699e-153	0.765217
Vav1	0.366	0.113	9.63943e-153	0.577219
Ppp1r2	0.371	0.577	9.74399e-153	-0.845691
Sec61b	0.905	0.754	1.37344e-152	0.581911
Emp3	0.901	0.69	1.99784e-152	0.578485
Oaz2	0.207	0.458	2.9792e-152	-0.885083
Nrp1	0.377	0.583	3.79197e-152	-1.13206
Edem1	0.465	0.204	1.61872e-151	0.664079
Gng2	0.408	0.145	1.85805e-151	0.640591
Ptp4a3	0.161	0.381	8.49651e-149	-0.993497
Taldo1	0.813	0.597	4.95524e-148	0.645601
Rnh1	0.694	0.502	7.328e-148	0.727367
Rpl17	0.993	0.993	1.33081e-147	-0.542379
Olfml3	0.13	0.369	1.80991e-147	-0.990059
Clec5a	0.267	0.062	4.09747e-147	0.598906
Emilin1	0.107	0.347	2.76452e-145	-0.785599
Adap2	0.395	0.143	5.18705e-145	0.655876
Amdhd2	0.338	0.111	2.04738e-143	0.616332
Pmepa1	0.056	0.29	3.32208e-143	-0.761483
Mprip	0.053	0.284	6.73626e-143	-0.64319
Fcrls	0.307	0.086	7.50542e-143	0.940676
Rps15a	0.996	0.99	1.62856e-142	-0.523254
Tgm2	0.567	0.317	6.65659e-142	0.866553
Rps27l	0.919	0.786	1.00252e-141	0.566587
Cltc	0.62	0.404	7.04698e-140	0.670674
Cd300a	0.389	0.143	7.59586e-140	0.513667
Atp6v0d1	0.602	0.355	1.15949e-139	0.652419
Atp6v1c1	0.437	0.204	1.19349e-139	0.655597
Gm10076	0.578	0.733	1.78412e-139	-0.697248
Myh9	0.635	0.376	2.40227e-138	0.754894
Id1	0.119	0.34	2.77057e-138	-1.43083
Efemp2	0.04	0.258	4.50324e-138	-0.609646
Rps12-ps3	0.749	0.832	5.0491e-138	-0.622978
Pkib	0.302	0.084	3.94878e-137	0.544956
Sgpl1	0.356	0.128	3.08104e-136	0.579463
Selenbp1	0.064	0.287	2.21747e-135	-0.824381
Mxd4	0.214	0.481	2.51352e-135	-0.769519
Atp6v1g1	0.863	0.728	4.39413e-135	0.555017
Cysltr1	0.296	0.082	7.56501e-135	0.542286
Hilpda	0.274	0.143	6.94634e-134	0.82743
Zfp36	0.8	0.545	1.8816e-133	0.56034
Hist1h2bc	0.122	0.374	4.3505e-133	-0.866383
Vmp1	0.593	0.348	1.12089e-132	0.663739
Slc7a7	0.281	0.076	1.24802e-132	0.506212
Atp6v1b2	0.496	0.235	1.34456e-132	0.622533
Lpcat2	0.334	0.107	9.50465e-131	0.548958
Ptma	0.972	0.988	1.10137e-130	-0.535378
Add3	0.093	0.333	1.60211e-130	-0.6745
Ypel3	0.389	0.652	2.05255e-130	-0.71632
Tmem189	0.374	0.149	7.34869e-130	0.615351
Arhgap31	0.173	0.362	1.01325e-129	-0.978491
Eif4ebp1	0.642	0.413	3.85582e-129	0.658189
D1Ertd622e	0.376	0.135	4.57374e-129	0.554352
Igfbp6	0.288	0.361	5.43462e-129	-0.986918
Ctnnb1	0.278	0.478	1.02587e-128	-0.771953
Nckap1l	0.32	0.1	1.1751e-128	0.526861
Gltscr2	0.511	0.717	2.57444e-128	-0.688151
Gpr35	0.257	0.063	3.12435e-128	0.520164
Milr1	0.346	0.116	5.59295e-128	0.535894
Rps10	0.967	0.974	7.39183e-128	-0.512327
Rpl39	0.994	0.992	2.20082e-127	-0.514418
Cav2	0.145	0.264	8.08192e-126	-0.975906
Capza1	0.556	0.314	8.31301e-126	0.609
Chmp4b	0.758	0.556	1.498e-125	0.596952
Kcnn4	0.255	0.064	1.7664e-125	0.521722
Rpl5	0.888	0.927	1.89898e-125	-0.543905
Stx7	0.644	0.39	2.32114e-125	0.607506
Lamtor4	0.667	0.447	2.34791e-125	0.612377
Il4ra	0.438	0.202	3.55586e-125	0.689254
Usmg5	0.842	0.683	7.72499e-125	0.545399
1110008F13Rik	0.708	0.499	1.26411e-124	0.590028
Rpl22l1	0.787	0.857	1.06559e-123	-0.640998
Jun	0.743	0.763	2.03139e-123	-0.941425
Csf2rb	0.319	0.103	3.1443e-123	0.547278
Fyn	0.078	0.306	4.66508e-123	-0.616621
Bola2	0.691	0.492	5.86233e-123	0.605797
Pstpip1	0.327	0.109	7.05826e-123	0.500149
Eef1b2	0.734	0.831	1.85869e-122	-0.59746
Mthfs	0.315	0.113	2.17427e-122	0.56141
Furin	0.379	0.168	2.36221e-122	0.671007
Sec61g	0.944	0.849	5.12223e-122	0.514487
Ece1	0.069	0.286	5.95275e-122	-0.68667
Alcam	0.287	0.085	6.17268e-122	0.537948
Rab7	0.763	0.591	1.10468e-121	0.561199
Gm2000	0.736	0.831	1.71111e-121	-0.578268
Erp29	0.773	0.592	2.4827e-121	0.581706
Golim4	0.066	0.281	2.20692e-120	-0.596322
Ttc3	0.056	0.265	3.84752e-120	-0.562771
Mrpl54	0.614	0.388	4.37936e-120	0.597083
Ccnd2	0.133	0.372	7.63602e-120	-0.908322
Ube2a	0.543	0.309	6.18209e-119	0.599374
Aldh2	0.495	0.652	2.74978e-118	-0.716145
Grb2	0.597	0.348	3.38879e-118	0.608631
Sap30	0.396	0.159	1.05645e-117	0.546549
Marcksl1	0.495	0.238	1.07629e-117	0.693458
Acvrl1	0.164	0.377	3.07442e-117	-0.715751
Mgst1	0.187	0.409	3.71928e-116	-0.883288
Rnase4	0.485	0.483	4.01884e-116	-0.578021
Dag1	0.062	0.274	4.05689e-116	-0.560131
Pura	0.213	0.456	4.45443e-116	-0.678081
B4galt5	0.355	0.142	4.69876e-116	0.586382
Lamtor1	0.665	0.478	7.55362e-116	0.579968
Plekho1	0.462	0.208	1.54626e-115	0.545651
Esd	0.7	0.551	2.27872e-115	0.615591
Asah1	0.671	0.455	5.78238e-115	0.592524
Abracl	0.703	0.49	1.42106e-114	0.587165
Cebpb	0.467	0.223	6.32977e-114	0.544891
Atp13a2	0.334	0.119	8.07795e-114	0.516186
Tppp3	0.173	0.383	8.58234e-114	-1.06934
Mkrn1	0.552	0.299	3.95654e-113	0.566176
Atraid	0.297	0.518	1.14863e-112	-0.652352
Cmpk1	0.683	0.48	1.32101e-112	0.574797
Wasl	0.076	0.289	1.58229e-112	-0.58092
Rpsa	0.962	0.964	2.30703e-112	-0.527363
Pink1	0.086	0.308	3.319e-112	-0.567366
Cltb	0.267	0.474	7.26798e-112	-0.696048
Myof	0.32	0.147	1.66911e-111	0.532094
Arf4	0.521	0.652	1.86218e-111	-0.608481
Bri3	0.783	0.672	6.76672e-111	0.548511
Gpi1	0.72	0.58	7.58104e-111	0.589933
Snrk	0.139	0.35	1.86837e-110	-0.760015
Ntpcr	0.379	0.159	7.58949e-110	0.575507
Hacd4	0.388	0.158	2.19613e-109	0.552394
Chd7	0.333	0.131	3.11772e-109	0.650746
Tmem51	0.292	0.096	3.7173e-109	0.519992
Smim10l1	0.173	0.394	3.80892e-109	-0.643048
Nck1	0.157	0.359	1.20584e-108	-0.765171
Tusc3	0.103	0.323	1.31602e-108	-0.571372
Susd3	0.342	0.126	1.85563e-108	0.514372
Atp6v1a	0.45	0.231	1.76597e-107	0.603821
Nfil3	0.312	0.116	8.8423e-107	0.578908
Ier2	0.714	0.767	2.30035e-106	-0.79109
Vps26a	0.443	0.221	3.22987e-106	0.556109
Tnfaip1	0.126	0.32	8.846e-106	-0.697776
Krtcap2	0.636	0.755	7.45805e-105	-0.55328
Cln8	0.324	0.127	1.89106e-104	0.511929
Cbx5	0.067	0.263	3.73846e-104	-0.522977
Pcmtd1	0.101	0.309	9.36081e-103	-0.593245
Dnajc15	0.514	0.28	9.36509e-103	0.55136
Tmem140	0.084	0.28	1.03905e-102	-0.661139
Cfl2	0.12	0.338	1.08307e-102	-0.592241
Rdx	0.378	0.555	4.60567e-102	-0.669656
Bcl2l1	0.393	0.175	5.60249e-102	0.5613
H1f0	0.203	0.413	2.17316e-101	-0.753113
Slc2a1	0.252	0.078	2.42109e-101	0.544309
Gltp	0.622	0.4	3.67939e-101	0.579505
Tln1	0.72	0.513	6.65577e-101	0.538951
Psip1	0.076	0.279	1.91611e-100	-0.535616
Got1	0.331	0.148	2.02705e-100	0.544679
Igf1	0.091	0.29	3.36437e-100	-0.762583
Zfos1	0.31	0.524	3.6042e-100	-0.676778
Bcl2	0.091	0.28	3.93954e-100	-0.690918
Egr1	0.481	0.553	5.98759e-100	-0.869761
Man2b1	0.486	0.25	1.50508e-99	0.564474
Tubb6	0.56	0.345	2.62148e-99	0.615342
1700025G04Rik	0.091	0.297	3.43163e-99	-0.558824
Dnase2a	0.359	0.149	5.16695e-99	0.504318
Rnf130	0.594	0.356	1.05183e-98	0.545012
Il6st	0.075	0.273	1.3281e-98	-0.52218
Pdia6	0.806	0.674	2.77527e-98	0.565272
Fus	0.599	0.739	7.32317e-98	-0.573929
Trim47	0.171	0.371	2.23108e-97	-0.64175
Gabarapl1	0.125	0.336	2.95248e-97	-0.590243
Nipa2	0.388	0.186	7.39547e-96	0.545073
Tprgl	0.411	0.594	4.1145e-95	-0.597532
Klf7	0.223	0.424	5.61304e-95	-0.686414
Smim14	0.468	0.655	6.04555e-95	-0.60257
Txndc5	0.275	0.421	9.92386e-95	-0.63971
Ccnd1	0.159	0.359	1.06562e-94	-0.826406
Hspa1a	0.344	0.382	2.3571e-94	-1.02695
Tgfb1	0.703	0.472	3.09697e-94	0.55083
Ecm1	0.652	0.429	3.2114e-94	0.659352
Tkt	0.674	0.468	6.43463e-94	0.539145
Itgb1	0.551	0.643	8.38969e-94	-0.56328
Abhd12	0.426	0.217	1.26555e-93	0.544588
Pigp	0.124	0.321	1.49618e-93	-0.540391
Pea15a	0.294	0.501	5.1888e-93	-0.635278
Spg21	0.528	0.341	7.75396e-93	0.525486
Tspan3	0.178	0.385	2.66888e-92	-0.615158
St13	0.721	0.559	3.39835e-91	0.51289
Ehd4	0.503	0.27	1.13254e-90	0.501375
Cx3cr1	0.307	0.118	3.70859e-90	0.537985
Mef2c	0.329	0.475	7.83285e-90	-0.744168
Ywhaq	0.567	0.688	8.88328e-90	-0.52345
AI413582	0.451	0.242	1.05662e-89	0.52006
Hmgb1	0.814	0.885	1.46804e-89	-0.515721
Abca1	0.299	0.126	2.67139e-89	0.532228
Eif4e	0.531	0.341	6.88569e-89	0.533479
Lrrfip1	0.523	0.295	7.07272e-89	0.536276
Uap1	0.159	0.346	1.70103e-88	-0.644873
Hsp90b1	0.865	0.735	4.60377e-88	0.502559
Lmo4	0.192	0.392	1.29761e-87	-0.641054
Foxp1	0.276	0.439	3.72515e-87	-0.655041
Cycs	0.707	0.546	4.01194e-87	0.508716
Sh3bgrl	0.694	0.52	4.55479e-87	0.514359
Srsf9	0.549	0.361	1.5291e-86	0.516994
Sptan1	0.169	0.365	1.94352e-86	-0.571355
Tmed3	0.41	0.545	6.14517e-86	-0.567327
Tbcb	0.616	0.45	7.82579e-86	0.501676
Snx6	0.529	0.357	9.37681e-86	0.530884
Ogt	0.268	0.488	1.12526e-85	-0.569899
Wbp5	0.355	0.52	2.71281e-85	-0.617342
Prkcd	0.461	0.251	4.91307e-85	0.530824
Oat	0.258	0.448	1.28487e-84	-0.57597
Bnip3	0.27	0.119	2.76397e-84	0.58199
Rhog	0.602	0.391	3.80246e-84	0.520065
Kdelr1	0.312	0.504	3.93728e-84	-0.558972
Lrrc8a	0.098	0.276	5.5727e-83	-0.631026
Uba52	0.446	0.573	9.5298e-83	-0.574665
Rnf11	0.176	0.371	1.77083e-82	-0.550015
Ptov1	0.173	0.369	1.81285e-81	-0.532431
Slc1a5	0.115	0.298	3.06962e-81	-0.517478
P2rx4	0.454	0.269	3.40623e-81	0.538345
Sod1	0.203	0.405	1.22295e-80	-0.554468
mt-Nd3	0.682	0.807	6.1447e-79	-0.503126
Cyb5r3	0.297	0.446	2.01334e-78	-0.611852
Dpm3	0.429	0.597	3.9507e-78	-0.530214
Nfic	0.301	0.472	1.13608e-77	-0.587726
Crip1	0.926	0.948	2.42458e-77	-0.611747
Srsf5	0.564	0.733	6.27454e-77	-0.515305
Acp5	0.271	0.108	1.01864e-76	0.568469
Tsen34	0.231	0.422	5.91609e-76	-0.516256
Ctnnbip1	0.244	0.312	5.58174e-75	-0.528213
BC005537	0.546	0.385	6.81766e-75	0.505313
Cirbp	0.12	0.295	1.45334e-73	-0.507101
Myadm	0.192	0.368	2.21207e-73	-0.546127
Mndal	0.236	0.39	3.04619e-73	-0.669283
Triobp	0.133	0.295	3.93704e-73	-0.519983
Dpysl2	0.317	0.508	4.30345e-73	-0.583337
H2-K1	0.824	0.878	4.77196e-73	-0.514687
Pgrmc1	0.191	0.377	7.65036e-73	-0.520855
Anapc5	0.296	0.477	1.49778e-72	-0.503066
Pdia4	0.518	0.364	3.86532e-72	0.511254
Rhob	0.289	0.459	6.18313e-72	-0.623714
Itm2c	0.468	0.61	1.45636e-71	-0.525955
Ctnna1	0.27	0.401	3.20777e-70	-0.536428
Prdx4	0.244	0.401	5.87562e-70	-0.532054
Ddx21	0.485	0.295	1.25552e-69	0.501518
Dusp6	0.415	0.22	1.63082e-69	0.501923
Ckb	0.336	0.533	3.59294e-69	-0.656563
Clic4	0.27	0.445	3.66187e-69	-0.570872
Fkbp3	0.301	0.47	3.24273e-67	-0.529631
Slc39a1	0.47	0.29	4.09697e-67	0.594345
Sept11	0.185	0.357	1.11646e-64	-0.522092
Cd302	0.381	0.48	4.1997e-63	-0.506031
Ifi203	0.265	0.425	4.18926e-62	-0.612668
Arhgef1	0.273	0.403	1.97633e-61	-0.503597
Klf4	0.52	0.609	5.6901e-60	-0.703918
Luzp1	0.165	0.317	3.04549e-59	-0.500493
Itpkb	0.199	0.307	3.94891e-59	-0.584048
Ktn1	0.153	0.294	1.25306e-57	-0.51379
Nupr1	0.327	0.436	5.66756e-53	-0.598555
Trf	0.424	0.257	3.08955e-47	0.544465
Rgcc	0.23	0.307	3.13396e-41	-0.787321
H2-Eb1	0.323	0.319	3.72894e-22	-0.905199

## Sheet: EC1 vs rest
Gene	pct.1	pct.2	p_val_adj	Log2FoldChange
Fabp4	0.996	0.636	0	3.77326
Gpihbp1	0.971	0.199	0	3.45287
Aqp1	0.786	0.158	0	3.32527
Cd36	0.971	0.269	0	3.12189
Sdpr	0.926	0.215	0	2.86499
Ly6c1	0.98	0.36	0	2.83091
Cav1	0.965	0.205	0	2.81783
Mgll	0.916	0.194	0	2.79233
Egfl7	0.937	0.157	0	2.70992
Cxcl12	0.841	0.266	0	2.70418
Cldn5	0.657	0.088	0	2.66885
Rgcc	0.851	0.204	0	2.62147
Tspan13	0.938	0.287	0	2.61497
Gng11	0.976	0.451	0	2.57363
Tcf15	0.769	0.094	0	2.54379
Emcn	0.874	0.124	0	2.53874
Cd300lg	0.778	0.107	0	2.52932
Esam	0.909	0.149	0	2.52646
Cdh5	0.894	0.132	0	2.52211
Kdr	0.798	0.106	0	2.52015
Aplnr	0.667	0.058	0	2.46288
C1qtnf9	0.745	0.082	0	2.45724
Cd200	0.813	0.198	0	2.41836
Slc9a3r2	0.885	0.251	0	2.32283
Myct1	0.764	0.085	0	2.20603
Nrp1	0.93	0.489	0	2.20337
1810011O10Rik	0.69	0.088	0	2.19545
Icam2	0.832	0.178	0	2.1577
Cav2	0.785	0.157	0	2.14455
Ecscr	0.79	0.13	0	2.13323
Lims2	0.79	0.208	0	2.12158
Pecam1	0.837	0.168	0	2.11147
Id1	0.753	0.232	0	2.11111
Ctla2a	0.721	0.156	0	2.10163
Tspan7	0.735	0.117	0	2.08559
Hspb1	0.89	0.429	0	2.01341
Ly6a	0.978	0.537	0	1.973
Cyp4b1	0.512	0.049	0	1.94682
Fabp5	0.906	0.414	0	1.94613
Arhgap31	0.786	0.258	0	1.94338
Flt1	0.708	0.112	0	1.9413
Car4	0.464	0.024	0	1.93381
Adgrl4	0.644	0.076	0	1.93017
Rasip1	0.675	0.078	0	1.92321
AW112010	0.847	0.351	0	1.89697
Tmem88	0.66	0.116	0	1.88844
Kank3	0.664	0.113	0	1.88756
Kitl	0.623	0.094	0	1.86602
Sgk1	0.709	0.291	0	1.86124
Gimap6	0.798	0.209	0	1.85544
Tie1	0.607	0.069	0	1.84719
Ptrf	0.834	0.378	0	1.84061
Tm4sf1	0.911	0.446	0	1.83901
Cyyr1	0.602	0.072	0	1.83776
Jam2	0.673	0.174	0	1.82156
Timp4	0.433	0.043	0	1.81525
Eng	0.821	0.343	0	1.80404
Tinagl1	0.652	0.114	0	1.79799
Car8	0.582	0.089	0	1.76369
Ramp2	0.856	0.368	0	1.75799
Smco4	0.645	0.214	0	1.74895
Ctnnbip1	0.683	0.239	0	1.74823
Unc45b	0.577	0.064	0	1.74726
Btnl9	0.484	0.046	0	1.73239
Sparcl1	0.932	0.461	0	1.72861
Fscn1	0.59	0.163	0	1.70552
Ushbp1	0.561	0.064	0	1.69491
Palmd	0.533	0.057	0	1.69339
Rsad2	0.445	0.073	0	1.689
Cdkn1c	0.507	0.183	0	1.68073
Fam101b	0.614	0.166	0	1.67191
Mmrn2	0.584	0.081	0	1.67159
Ptp4a3	0.677	0.293	0	1.66401
Gimap4	0.654	0.153	0	1.64428
Cd93	0.715	0.25	0	1.64283
Sept4	0.656	0.195	0	1.63992
Aqp7	0.457	0.042	0	1.63889
Adgrf5	0.574	0.096	0	1.63813
Tcf4	0.928	0.608	0	1.60041
Itpkb	0.64	0.232	0	1.59646
Rbp7	0.469	0.096	0	1.58791
Cd81	0.989	0.68	0	1.58752
Arhgef15	0.509	0.054	0	1.56502
Col4a2	0.703	0.325	0	1.56412
Cdh13	0.5	0.059	0	1.55245
Trp53i11	0.443	0.072	0	1.55035
Itga6	0.562	0.154	0	1.53138
Tshz2	0.576	0.181	0	1.52379
Id3	0.89	0.516	0	1.51471
Clec1a	0.475	0.049	0	1.51152
Bcam	0.567	0.109	0	1.51083
Fam43a	0.568	0.155	0	1.50739
Rhoc	0.764	0.475	0	1.50641
Plpp1	0.634	0.31	0	1.50561
Afap1l1	0.497	0.054	0	1.50127
Clic5	0.435	0.041	0	1.48441
Ehd2	0.624	0.246	0	1.48283
Gm12002	0.396	0.021	0	1.47285
Podxl	0.521	0.083	0	1.46862
S100a16	0.84	0.431	0	1.46258
Meox2	0.491	0.11	0	1.45352
Ccnd1	0.59	0.284	0	1.43626
Plpp3	0.751	0.383	0	1.43179
Col4a1	0.757	0.391	0	1.43029
Aplp2	0.81	0.503	0	1.4209
Ptprb	0.543	0.121	0	1.4155
Sptbn1	0.877	0.518	0	1.4123
Slc26a10	0.36	0.036	0	1.40846
Kcna5	0.416	0.046	0	1.39642
Nrp2	0.48	0.155	0	1.38471
Ccdc85b	0.521	0.159	0	1.38314
Mllt4	0.472	0.13	0	1.37646
Apbb2	0.503	0.128	0	1.36932
Fkbp1a	0.923	0.764	0	1.3641
Dusp3	0.672	0.406	0	1.36077
Bcl6b	0.402	0.047	0	1.35297
Ets2	0.539	0.186	0	1.35289
Cxx1a	0.549	0.253	0	1.34981
Cmtm8	0.413	0.046	0	1.34849
Fermt2	0.691	0.32	0	1.3441
Nes	0.428	0.087	0	1.34329
Ppp1r2	0.762	0.509	0	1.34049
BC028528	0.571	0.254	0	1.33931
Slc28a2	0.427	0.072	0	1.33873
Ets1	0.66	0.248	0	1.32927
Nck1	0.599	0.283	0	1.32386
Tubb4b	0.722	0.465	0	1.3182
Pls3	0.607	0.265	0	1.31553
Ctnna1	0.616	0.342	0	1.28518
Snrk	0.564	0.276	0	1.2802
Tnfaip1	0.551	0.247	0	1.26853
Ctnnb1	0.667	0.41	0	1.25422
Bst2	0.754	0.558	0	1.25415
Thrsp	0.33	0.029	0	1.25056
Plcb4	0.412	0.092	0	1.24981
Pcdh17	0.338	0.033	0	1.23435
Elk3	0.586	0.275	0	1.2321
Cd151	0.682	0.384	0	1.21993
N4bp3	0.381	0.053	0	1.2172
Tmem204	0.488	0.193	0	1.21621
Adam15	0.598	0.347	0	1.20775
Robo4	0.374	0.036	0	1.19665
Crip2	0.925	0.498	0	1.19299
Klf7	0.598	0.359	0	1.17943
Ccdc85a	0.326	0.017	0	1.17632
Ly6e	0.987	0.892	0	1.16991
Sparc	0.989	0.605	0	1.16322
Tmem140	0.466	0.214	0	1.15323
Cxx1b	0.433	0.183	0	1.11196
Sypl	0.631	0.421	0	1.10536
Jam3	0.385	0.159	0	1.08953
Dok4	0.315	0.037	0	1.06102
Gnas	0.98	0.902	0	1.03341
Tpm4	0.845	0.743	0	0.976377
Rab11a	0.715	0.542	0	0.972128
Itgb1	0.757	0.607	0	0.96536
Igfbp7	0.993	0.668	0	0.927107
S100a13	0.777	0.684	0	0.924315
Wasf2	0.639	0.528	0	0.920029
Atp5j	0.918	0.856	0	0.89916
Ndufa8	0.655	0.553	0	0.877601
Myl6	0.983	0.965	0	0.811559
Rgs10	0.057	0.496	0	-1.36306
Celf2	0.024	0.577	0	-1.40506
Prdx5	0.252	0.722	0	-1.42445
Zeb2	0.031	0.584	0	-1.59219
Lrp1	0.041	0.582	0	-1.60815
Gm2a	0.089	0.574	0	-1.62647
Pid1	0.026	0.53	0	-1.65133
Rnase4	0.087	0.549	0	-1.68299
Ctsb	0.666	0.836	0	-1.73328
Cstb	0.267	0.681	0	-1.76826
Rac2	0.026	0.462	0	-1.81868
Arhgdib	0.154	0.668	0	-1.86703
Ctsh	0.04	0.51	0	-1.95574
Cd63	0.211	0.614	0	-1.96775
Lsp1	0.079	0.697	0	-2.01203
Laptm5	0.039	0.491	0	-2.01341
Cd53	0.039	0.498	0	-2.02008
Fth1	0.969	0.997	0	-2.03394
S100a6	0.577	0.886	0	-2.08587
Ftl1	0.983	0.996	0	-2.1113
Emp3	0.143	0.819	0	-2.11531
Mt1	0.107	0.622	0	-2.14792
S100a4	0.052	0.473	0	-2.20323
Cotl1	0.101	0.602	0	-2.30344
Lgals1	0.446	0.857	0	-2.39331
Ifi27l2a	0.339	0.791	0	-2.40167
Tgfbi	0.038	0.52	0	-2.45753
Coro1a	0.044	0.527	0	-2.48647
Ctsc	0.043	0.455	0	-2.64279
Bgn	0.256	0.496	0	-2.66271
Mgp	0.597	0.641	0	-2.7445
Tyrobp	0.133	0.536	0	-3.18925
Apoe	0.718	0.899	0	-3.20951
Cd52	0.102	0.593	0	-3.21775
Gsn	0.707	0.826	0	-3.31298
Fcer1g	0.132	0.527	0	-3.37124
Ctss	0.086	0.536	0	-3.3959
Dcn	0.604	0.617	0	-3.47604
Lyz2	0.377	0.705	0	-4.37699
Adgrg1	0.356	0.043	7.7439849329157e-320	1.16782
Anp32a	0.696	0.6	7.7439849329157e-320	0.896993
Cdk2ap2	0.157	0.612	7.7439849329157e-320	-1.14715
Sult1a1	0.339	0.055	1.54879698658314e-319	1.21026
Alox5ap	0.036	0.426	1.27775751393109e-317	-2.26886
Ifi30	0.045	0.449	5.00261426666354e-316	-1.74124
Cd34	0.866	0.458	4.02694960496549e-315	1.00066
Rasgrp3	0.399	0.067	5.91036418049992e-315	1.18727
Rpl10	0.98	0.994	6.13190642465625e-313	-0.703336
Hspa12b	0.382	0.072	3.24049287529503e-312	1.16759
Jup	0.556	0.278	1.4689691323642e-311	1.12413
Ehd1	0.602	0.396	6.68865855567707e-310	1.06882
Timp2	0.165	0.574	2.31221794361971e-309	-1.6791
Arhgap29	0.371	0.12	5.72273158167141e-308	1.07297
Anxa1	0.159	0.604	1.47922e-306	-1.33919
Lgmn	0.124	0.512	2.52765e-306	-2.39087
Apbb1ip	0.016	0.393	2.94851e-306	-0.990132
Wfdc17	0.057	0.435	4.95929e-306	-2.85391
Lcp1	0.048	0.447	1.47346e-304	-1.63484
Serp1	0.22	0.664	1.02171e-303	-1.06259
Nupr1	0.064	0.477	1.7984e-303	-1.3596
Fez2	0.457	0.229	9.6703e-302	1.02512
Lgals3	0.068	0.45	9.9596e-302	-2.90449
Efna1	0.374	0.064	1.42751e-299	1.13449
Plod1	0.444	0.263	1.60411e-299	0.915671
Etl4	0.318	0.041	6.13645e-298	1.09247
Arid5b	0.466	0.216	6.97304e-298	1.13322
Mafb	0.052	0.448	1.84003e-297	-1.81063
Tpst2	0.516	0.329	2.03796e-296	0.941676
4930523C07Rik	0.596	0.341	2.08574e-295	1.1415
Abcg2	0.409	0.109	7.34707e-295	1.19083
Cltb	0.6	0.416	9.3053e-294	0.94609
Ms4a6c	0.018	0.381	4.934e-292	-2.03848
Cd302	0.101	0.524	2.80563e-291	-1.12599
Ctsd	0.513	0.78	5.55076e-291	-1.63896
Spi1	0.025	0.394	2.60369e-289	-1.60013
Ndrg1	0.469	0.171	4.58063e-289	1.15469
Metrnl	0.039	0.422	4.34948e-288	-1.28947
Rapgef3	0.303	0.035	2.75144e-287	1.05443
Ybx1	0.973	0.941	3.39323e-286	0.771534
Tspan12	0.388	0.096	2.14589e-285	1.07522
Ptprc	0.024	0.388	3.75545e-284	-1.36891
App	0.827	0.686	4.29287e-284	0.915474
Ift122	0.298	0.051	4.75367e-284	1.20898
Pim3	0.433	0.182	1.44771e-283	1.14274
Nfib	0.686	0.376	6.5548e-283	1.12613
Arhgap18	0.346	0.13	1.4599e-281	1.00328
Stap2	0.284	0.027	5.29969e-281	0.96073
Csrp1	0.571	0.356	1.25157e-280	1.04145
Itgb5	0.056	0.448	3.18993e-280	-1.01084
Lrrc8c	0.409	0.137	4.59687e-280	1.07986
Clec14a	0.393	0.072	4.77081e-280	1.17224
Gpsm3	0.066	0.466	1.45878e-279	-1.00576
Sat1	0.374	0.779	2.16015e-279	-1.07667
Calm1	0.981	0.956	7.22338e-279	0.747695
Cfh	0.062	0.441	1.63592e-278	-1.87183
Cd74	0.194	0.495	5.97517e-278	-4.25831
Myo10	0.347	0.07	2.27272e-277	1.12969
Mapk3	0.56	0.416	1.01513e-276	0.885539
Cd68	0.023	0.374	5.64659e-276	-1.80621
Rplp0	0.976	0.993	6.18257e-276	-0.756128
Fos	0.584	0.878	3.57411e-275	-1.43515
Fcgr3	0.024	0.373	7.66821e-274	-1.86337
Myl12a	0.959	0.913	1.10005e-273	0.772481
Pde2a	0.339	0.057	1.46836e-273	1.05731
Fmo1	0.378	0.12	9.5256e-273	1.12272
Apold1	0.364	0.059	2.75869e-270	1.44395
Ramp3	0.307	0.039	3.70462e-268	1.06598
Rps9	0.971	0.995	1.41034e-267	-0.709961
Pdzd2	0.457	0.171	4.26906e-267	1.19668
Col3a1	0.218	0.497	7.29309e-266	-2.61366
Gja1	0.336	0.073	6.89648e-264	1.20141
Gngt2	0.724	0.405	1.84743e-262	1.06189
Epas1	0.493	0.185	2.31989e-261	1.13642
Ablim3	0.268	0.028	3.33443e-261	0.930885
S1pr1	0.503	0.155	4.47311e-261	1.12683
Pdlim1	0.562	0.343	5.09899e-261	1.06403
Rassf9	0.288	0.032	1.30554e-260	1.06399
Fyb	0.026	0.371	3.67759e-260	-1.376
Col1a2	0.115	0.443	6.65694e-260	-2.5778
8430408G22Rik	0.355	0.059	1.13813e-258	1.46104
Cracr2b	0.365	0.077	1.53693e-258	1.06556
Slfn5	0.461	0.235	1.57108e-258	1.09854
Fn1	0.094	0.467	4.16829e-258	-2.03042
Pnkd	0.449	0.329	4.23285e-258	0.781822
Efhd2	0.095	0.479	8.07975e-257	-1.28346
Tspan15	0.297	0.036	7.4986e-256	0.988534
H2-K1	0.912	0.863	1.86799e-255	0.88088
H2-Ab1	0.187	0.464	6.02827e-255	-3.11144
Gm42418	0.747	0.582	8.2997e-255	1.04905
Ms4a6b	0.017	0.346	4.2692e-254	-1.42347
2610305D13Rik	0.28	0.041	4.75149e-254	0.945527
Wwtr1	0.42	0.2	2.61518e-253	0.95713
Lilrb4a	0.016	0.342	1.25152e-251	-1.60261
Gnai2	0.893	0.872	1.32485e-250	0.696224
Lst1	0.046	0.391	2.6165e-250	-1.78167
Triobp	0.415	0.245	1.18974e-248	0.87081
Ccl6	0.055	0.396	6.71248e-248	-2.95711
Nostrin	0.331	0.076	9.59503e-248	1.02423
Mmd	0.316	0.117	1.49108e-247	0.92198
Ccl9	0.036	0.369	1.64904e-247	-2.51109
Lgals9	0.486	0.349	2.10393e-247	0.897261
Eepd1	0.304	0.067	3.26553e-247	0.978129
Fam212a	0.322	0.098	1.19161e-246	0.966733
Tmod3	0.531	0.376	1.40955e-246	0.868162
Plxnd1	0.356	0.11	2.99287e-246	1.00554
Slc6a6	0.48	0.377	3.9475e-246	1.13605
Scarb1	0.364	0.125	5.54668e-246	1.00463
Sdc4	0.021	0.349	5.91479e-246	-1.04748
Npc2	0.566	0.845	1.60739e-245	-1.00738
Thbd	0.477	0.256	2.71237e-245	1.14173
Mndal	0.536	0.338	1.06711e-244	1.08816
Hsp90ab1	0.976	0.966	3.61496e-243	0.697949
Gimap1	0.506	0.154	4.50797e-243	0.958483
Pitpnc1	0.389	0.131	5.201e-243	1.06561
Cd48	0.013	0.327	8.35449e-243	-1.12646
Fli1	0.51	0.265	1.97453e-242	0.994547
Adgrl2	0.297	0.052	2.3944e-242	0.950662
Itgb2	0.017	0.335	7.47421e-242	-1.20686
4931406P16Rik	0.387	0.164	7.56482e-241	0.956632
Igfbp4	0.169	0.498	2.6455e-240	-1.90521
Col1a1	0.072	0.401	8.20915e-240	-2.48969
Sox7	0.269	0.037	2.68441e-238	0.936774
Pycard	0.065	0.424	4.43473e-238	-1.07825
Cmtm7	0.138	0.524	1.77652e-237	-0.889017
Gmfg	0.04	0.375	2.96183e-237	-1.26003
Sirpa	0.019	0.335	3.33652e-237	-0.947829
Ptpn6	0.016	0.328	1.43362e-236	-1.0932
Gpx1	0.581	0.835	1.12468e-235	-1.11968
Ms4a6d	0.018	0.329	1.44215e-235	-1.65992
Fkbp3	0.501	0.433	2.1603e-235	0.742686
Axl	0.062	0.41	2.21565e-235	-1.2385
Dap	0.126	0.512	3.53147e-235	-0.924662
Ly86	0.014	0.319	1.53892e-234	-1.34597
Dll4	0.288	0.037	2.7516e-234	0.950587
Lhfp	0.079	0.406	2.78537e-233	-1.63756
Olfml3	0.044	0.379	3.22963e-233	-1.1854
Serping1	0.137	0.425	2.41788e-232	-2.11451
Prex2	0.422	0.162	2.50092e-232	1.07964
Cr1l	0.47	0.352	4.62623e-232	0.787329
Clic4	0.53	0.399	6.8881e-232	0.839221
Lmo7	0.282	0.036	1.3763e-231	0.948317
Lum	0.206	0.448	3.20473e-231	-2.12261
Gm10116	0.166	0.54	3.22774e-231	-1.15976
Cygb	0.073	0.391	3.6618e-231	-1.80206
Gna11	0.471	0.285	4.56681e-231	0.871885
Sdc2	0.038	0.359	4.96743e-231	-1.35958
Luzp1	0.441	0.268	3.10519e-230	0.861124
Selplg	0.013	0.314	6.76921e-230	-1.10165
Ywhaq	0.692	0.665	1.16573e-229	0.659166
Pcdh1	0.279	0.037	1.20535e-229	0.914151
S100a1	0.441	0.277	2.49167e-229	0.88285
Ptma	0.995	0.984	2.83313e-229	0.621413
Ccr2	0.021	0.325	4.83019e-229	-1.82988
Fam105a	0.009	0.302	6.04145e-229	-1.0127
Laptm4a	0.928	0.783	6.6099e-229	0.797406
Mpeg1	0.017	0.321	9.81911e-229	-1.28996
Rab7b	0.006	0.293	4.23912e-228	-0.793215
Fcgr2b	0.018	0.322	5.44361e-228	-1.29141
Ctsz	0.44	0.772	1.30869e-227	-0.965365
Smagp	0.438	0.152	1.31245e-227	1.04298
Cd14	0.026	0.332	1.57815e-227	-1.8915
Mxd4	0.514	0.426	3.59509e-227	0.760304
Ccdc109b	0.016	0.318	3.82382e-227	-0.807359
Mcf2l	0.263	0.036	9.65615e-227	0.941102
Junb	0.612	0.899	1.17385e-226	-1.04917
Fam49b	0.109	0.465	3.38949e-226	-1.28224
Igfbp6	0.07	0.396	7.58857e-226	-1.53504
Col6a1	0.054	0.377	8.45144e-226	-1.51657
Tax1bp3	0.534	0.434	8.39782e-225	0.722849
Pdlim2	0.064	0.407	2.47026e-224	-1.11646
Ktn1	0.441	0.244	5.06046e-224	0.927596
C5ar1	0.019	0.318	2.12984e-223	-1.75458
Capg	0.228	0.612	4.08677e-223	-1.09738
Kctd12b	0.277	0.057	7.04213e-223	0.997454
Ecm1	0.146	0.516	7.59379e-223	-1.12772
Pld4	0.018	0.315	1.43251e-222	-1.21332
Htra3	0.147	0.424	2.02978e-222	-2.03783
H2-Aa	0.145	0.408	2.72257e-222	-3.25233
Gpx3	0.169	0.44	8.70008e-222	-2.1155
Rps28	0.971	0.993	3.19029e-221	-0.678689
Mtdh	0.604	0.587	1.13271e-220	0.640007
Rpsa	0.897	0.974	1.82093e-220	-0.795424
Fxyd5	0.424	0.754	1.52979e-219	-1.12166
Oaz2	0.53	0.4	3.04335e-219	0.888457
Myo18a	0.297	0.086	5.98756e-218	0.9125
Hras	0.345	0.271	7.17266e-218	0.649093
AF251705	0.019	0.312	1.0998e-217	-1.27602
Plscr3	0.359	0.211	8.52906e-217	0.757253
Adipor1	0.62	0.521	1.06929e-216	0.71867
Actn4	0.495	0.383	1.26663e-216	0.785007
Plk2	0.426	0.141	7.39068e-215	1.12279
Plek	0.017	0.308	8.25791e-215	-1.13061
Trf	0.026	0.326	2.16714e-214	-1.18266
Galnt18	0.279	0.042	4.39898e-214	0.90045
Lrrc8a	0.397	0.224	6.10651e-214	0.964153
AB124611	0.007	0.281	1.25145e-213	-0.90717
H2-D1	0.988	0.97	1.1786e-212	0.620068
Serpinf1	0.07	0.385	3.05568e-212	-1.63869
Cybb	0.018	0.305	7.75651e-212	-1.24544
Tspan6	0.326	0.128	9.589e-212	0.903196
Art3	0.331	0.08	3.20187e-211	0.812349
Uaca	0.3	0.089	2.58303e-210	0.873658
Fus	0.727	0.715	2.60176e-210	0.641294
Plscr2	0.319	0.072	5.8851e-210	1.09256
Meg3	0.034	0.33	9.59681e-210	-1.87541
Rcn3	0.065	0.387	1.02739e-209	-1.34968
Stx12	0.397	0.318	1.70681e-209	0.649897
Tsc22d1	0.549	0.309	3.72743e-209	1.02336
Cfap20	0.353	0.236	4.64004e-209	0.711214
Loxl1	0.076	0.384	5.21478e-209	-1.55451
Aif1	0.021	0.308	5.78701e-209	-1.48455
Lmcd1	0.296	0.06	1.02284e-208	0.946484
Fam46a	0.018	0.303	9.47695e-208	-0.798629
Ncf2	0.018	0.301	4.27467e-207	-0.99371
Msrb1	0.16	0.487	4.5657e-207	-1.21497
Arpc1b	0.813	0.945	6.14914e-207	-0.82743
Dab2ip	0.302	0.105	1.22566e-206	0.881835
Myo1b	0.34	0.091	1.42228e-206	0.941477
Limd2	0.049	0.354	2.63931e-206	-1.19661
Gm8730	0.514	0.824	3.03062e-206	-0.826404
Sema6a	0.268	0.055	6.02019e-206	0.874655
Dpt	0.104	0.396	2.86134e-205	-1.73843
Sh2d3c	0.276	0.053	2.98673e-205	0.863848
Tpd52	0.08	0.403	3.33729e-205	-1.25512
Evi2a	0.009	0.277	5.14451e-205	-0.874488
Mfap5	0.165	0.415	6.67862e-205	-2.02433
Tsnax	0.33	0.241	9.02227e-205	0.685864
Tanc1	0.311	0.089	1.80301e-204	0.906446
Nrarp	0.311	0.055	2.04064e-204	0.971335
Rsu1	0.564	0.541	4.4381e-204	0.598939
Cnn3	0.548	0.35	5.37084e-204	0.879445
H2-DMa	0.033	0.325	7.4032e-204	-1.37687
Mrpl17	0.439	0.438	1.02293e-203	0.542745
Sox4	0.378	0.188	1.04943e-203	1.01188
Vimp	0.174	0.532	5.71731e-203	-0.65691
Thbs1	0.031	0.324	8.58969e-203	-1.65631
Grrp1	0.286	0.044	1.73267e-202	0.909752
Crispld2	0.054	0.346	2.15416e-201	-1.62909
Mgst1	0.09	0.42	2.58359e-201	-1.06999
Csf1r	0.03	0.323	2.70879e-201	-1.25033
Pea15a	0.532	0.458	3.36489e-201	0.676346
Tek	0.347	0.16	3.72493e-201	0.886485
Fnbp1l	0.282	0.074	6.93917e-201	0.89863
Vcan	0.02	0.3	9.57285e-201	-0.893976
B230219D22Rik	0.438	0.383	2.53535e-200	0.643162
Islr	0.021	0.301	2.90579e-200	-1.15164
Anxa3	0.681	0.501	3.7642e-200	0.874815
Hspa1a	0.48	0.359	8.07622e-200	1.52865
Mcam	0.305	0.058	1.41138e-199	0.960517
Glipr2	0.019	0.297	2.09401e-199	-0.740324
Cebpb	0.021	0.301	6.02829e-199	-0.908955
Klk8	0.329	0.071	6.10069e-199	0.995412
Clec4a2	0.012	0.279	1.13239e-198	-1.12433
Plac8	0.037	0.31	2.21403e-198	-2.39788
Chmp5	0.485	0.471	2.22421e-198	0.550459
Plxdc2	0.018	0.294	2.7454e-198	-0.885134
Gabarapl2	0.595	0.603	4.78744e-198	0.538925
Irf5	0.016	0.29	5.25651e-198	-0.81903
Rarres2	0.11	0.401	5.81976e-198	-1.57818
Tprgl	0.598	0.56	1.08781e-197	0.616228
Mef2c	0.643	0.421	1.36135e-197	0.875719
Hn1	0.309	0.67	1.95325e-197	-0.679921
Ncf4	0.012	0.277	4.44382e-197	-0.90145
Txnip	0.665	0.533	8.66619e-197	0.877461
Emilin2	0.011	0.275	9.27829e-197	-0.859716
Ccdc80	0.201	0.428	3.82443e-196	-1.80205
Gpm6b	0.04	0.332	6.34935e-196	-1.26533
AI607873	0.017	0.29	6.93803e-196	-0.861613
Fxyd1	0.056	0.363	6.9567e-196	-1.2525
Myadm	0.424	0.327	7.14036e-196	0.716901
Ogn	0.068	0.358	8.94667e-196	-1.69291
Emb	0.012	0.276	1.02139e-195	-1.02705
Fstl1	0.137	0.412	1.44762e-195	-1.75968
Btg1	0.626	0.822	1.60093e-195	-1.04319
Pim1	0.108	0.435	2.42068e-195	-1.20636
Hspg2	0.622	0.362	3.78866e-195	0.920176
Rpl39	0.978	0.995	5.20332e-195	-0.660303
Fkbp2	0.175	0.523	7.63689e-195	-0.646793
Fbln1	0.065	0.35	1.8487e-194	-1.68567
Clec4a3	0.012	0.275	2.70814e-194	-1.11143
Abhd17a	0.417	0.35	3.35951e-194	0.62697
Plcb1	0.29	0.064	4.90146e-194	0.934468
B2m	0.997	0.991	5.76741e-194	0.570686
Col6a2	0.055	0.355	6.73014e-194	-1.28006
Rftn1	0.359	0.274	9.49479e-194	0.679433
Serpine2	0.048	0.344	1.39611e-193	-1.33384
H2-Q4	0.371	0.184	1.76327e-193	0.95158
Cyth4	0.014	0.28	2.234e-193	-0.86331
Gas1	0.059	0.35	2.94489e-193	-1.6344
Stk17b	0.059	0.368	4.81135e-193	-1.05755
Ndufa4	0.814	0.808	9.37738e-193	0.579445
9430020K01Rik	0.279	0.098	2.77311e-192	0.778995
Clec3b	0.122	0.345	3.59183e-192	-2.12519
Creg1	0.152	0.494	4.37562e-192	-0.784901
Mmp2	0.072	0.366	7.98003e-192	-1.39617
Tnfaip8l2	0.009	0.263	2.60278e-191	-0.815787
Adcy4	0.276	0.053	3.20147e-191	0.856784
Ugp2	0.128	0.465	7.05237e-191	-0.79323
Il1b	0.047	0.324	7.30411e-191	-2.43349
Cdc42ep3	0.398	0.193	7.56969e-191	0.940891
Scpep1	0.034	0.312	1.06859e-190	-0.588723
P2rx4	0.046	0.34	5.92708e-190	-0.689035
Tsfm	0.259	0.175	1.1171e-189	0.62312
Tnfrsf1a	0.547	0.513	1.67006e-189	0.598797
Cfp	0.016	0.278	8.18294e-189	-1.25759
Pirb	0.011	0.266	1.02833e-188	-0.872696
Cd38	0.378	0.134	2.30618e-188	0.925601
Snhg18	0.028	0.305	1.09545e-187	-0.938992
Fcgr1	0.012	0.269	1.32181e-187	-1.13217
C1qb	0.102	0.34	1.46285e-187	-2.89298
Pdgfd	0.262	0.045	3.33063e-187	0.822149
AI662270	0.018	0.282	3.56535e-187	-0.883827
Txndc5	0.111	0.445	6.5647e-187	-0.870675
Nbeal1	0.35	0.254	1.18366e-186	0.685644
Arhgap30	0.01	0.262	1.32883e-186	-0.796748
Bcl2a1b	0.012	0.264	1.759e-186	-1.32249
Rgs2	0.086	0.39	3.29315e-186	-1.3552
Pcolce2	0.031	0.309	6.69822e-186	-1.25719
Akap2	0.293	0.104	9.6017e-186	0.833969
Serinc1	0.495	0.488	1.31619e-185	0.542206
Rab3il1	0.028	0.3	2.0517e-185	-0.676093
Knop1	0.349	0.249	3.47645e-185	0.704834
Arglu1	0.443	0.356	7.70472e-185	0.695775
Psme1	0.641	0.582	1.21066e-184	0.652855
Tmem59	0.802	0.739	1.22741e-184	0.647343
F11r	0.29	0.079	2.44998e-184	0.867232
Irf8	0.06	0.36	4.37652e-184	-0.993304
Bnip2	0.481	0.464	5.51672e-184	0.548601
Dhrs3	0.452	0.365	6.90777e-184	0.748358
Rnf149	0.054	0.349	1.24468e-183	-0.861775
Entpd2	0.051	0.336	1.35034e-183	-1.23394
Smad1	0.27	0.138	2.25792e-183	0.700772
Sec14l1	0.352	0.261	3.69041e-183	0.659882
Smoc2	0.109	0.367	9.76052e-183	-1.9333
Ephb4	0.277	0.065	2.14999e-182	0.805932
Angptl2	0.02	0.278	4.17479e-182	-0.876437
Tns1	0.375	0.206	6.0594e-182	0.818065
Bicc1	0.026	0.296	7.97797e-182	-0.900694
Hexb	0.207	0.527	8.76577e-182	-0.926259
Efnb1	0.262	0.094	1.05537e-181	0.822813
Hdac7	0.315	0.16	1.65729e-181	0.759859
Xdh	0.277	0.19	2.61095e-181	0.676262
Son	0.79	0.779	2.91227e-181	0.575548
Cp	0.019	0.279	5.24517e-181	-0.979527
H2-Eb1	0.12	0.353	1.86783e-180	-2.97616
Trem2	0.011	0.254	3.35955e-180	-1.25508
Lat2	0.009	0.251	3.69782e-180	-0.806671
Spp1	0.072	0.345	5.7524e-180	-3.40344
Sod3	0.035	0.311	6.12109e-180	-1.00127
Hexa	0.272	0.612	6.26788e-180	-0.838386
H2afj	0.249	0.595	7.52405e-180	-0.650822
Hmg20b	0.376	0.307	2.13913e-179	0.601653
Medag	0.025	0.291	2.38374e-179	-0.916223
H2B-EGFP	0.027	0.293	4.8503e-179	-1.06553
Ifi203	0.55	0.376	5.13552e-179	0.917275
Reep3	0.44	0.387	8.29025e-179	0.608902
Cytip	0.011	0.252	1.65057e-178	-0.956545
Sh3bgrl3	0.757	0.892	2.28309e-178	-0.813291
Uqcrb	0.828	0.83	2.69497e-178	0.543977
Bag5	0.312	0.235	7.20699e-178	0.614969
Prkch	0.301	0.098	8.69397e-178	0.833046
Gabarap	0.685	0.898	1.33256e-177	-0.693766
Cyba	0.686	0.858	1.43761e-177	-0.898323
Pcolce	0.259	0.429	1.94424e-177	-1.42409
Iigp1	0.276	0.066	2.26597e-177	1.35599
Sec61b	0.52	0.82	1.29798e-176	-0.684849
Rpl10-ps3	0.475	0.785	2.51972e-176	-0.801535
Vwa1	0.518	0.315	6.05204e-175	0.93271
Snx18	0.075	0.369	9.772e-175	-0.628673
Rab6a	0.479	0.469	1.13244e-174	0.513545
Aspn	0.044	0.306	4.87089e-174	-1.58376
Ercc1	0.254	0.183	7.96769e-174	0.589445
Pabpc1	0.59	0.853	1.02802e-173	-0.710642
Ptgis	0.047	0.324	2.69107e-173	-1.0594
Cdc42ep1	0.279	0.13	8.75625e-173	0.745316
Lama2	0.02	0.272	1.92582e-172	-0.789472
Hmgb1	0.894	0.87	6.10353e-172	0.579393
Rcsd1	0.394	0.232	9.89457e-172	0.798287
Sox17	0.264	0.046	1.05282e-171	0.947777
Plscr4	0.314	0.173	1.48151e-171	0.728969
Dlc1	0.389	0.206	1.73748e-171	0.835507
Tpi1	0.277	0.604	1.10071e-170	-0.716755
Ccser2	0.382	0.253	1.29319e-170	0.718935
Kif5b	0.581	0.584	2.1259e-170	0.508163
Snx5	0.164	0.487	2.12748e-170	-0.811936
Sdf2l1	0.103	0.411	5.15246e-170	-0.913875
Qk	0.4	0.366	1.13337e-169	0.53487
Oaf	0.064	0.344	1.42775e-169	-1.08346
Mfng	0.278	0.076	2.17082e-169	0.825577
Prkcd	0.047	0.323	4.88635e-169	-0.678831
Cyb5r3	0.494	0.41	7.01117e-169	0.729196
Kctd10	0.327	0.235	1.41721e-168	0.638669
Tubb2a	0.539	0.439	1.56757e-168	0.731004
C1qa	0.085	0.3	3.09023e-168	-2.79844
G0s2	0.074	0.345	3.28107e-168	-1.43034
Ahnak2	0.017	0.26	3.76459e-168	-0.769512
Ddx5	0.939	0.927	8.04394e-168	0.576223
Hmox1	0.093	0.347	1.14898e-167	-2.08129
Rbp1	0.109	0.391	1.29367e-167	-1.48774
Chil3	0.027	0.265	1.72861e-167	-2.92715
Rnh1	0.256	0.578	5.48843e-167	-0.651689
Lipe	0.252	0.073	6.54394e-167	0.797994
Col8a1	0.049	0.309	8.00094e-167	-1.53113
Ppp1r11	0.423	0.424	1.94945e-166	0.502923
Naaa	0.016	0.256	2.00563e-166	-0.684295
Sptan1	0.4	0.323	2.28012e-166	0.61034
Itga1	0.26	0.061	2.87317e-166	0.830703
Prdx6	0.232	0.544	5.83313e-166	-0.710106
Rps27a	0.985	0.997	7.64311e-166	-0.522812
Cdipt	0.319	0.251	7.79947e-166	0.598941
Sod1	0.412	0.366	8.32921e-166	0.573354
Xaf1	0.346	0.219	3.31573e-165	0.745634
Gbp7	0.324	0.153	6.16428e-165	0.830722
Pi16	0.231	0.422	1.64771e-164	-1.72211
Ms4a7	0.021	0.255	2.51917e-164	-1.84881
Ccl2	0.053	0.315	5.24739e-164	-2.42571
Prelp	0.071	0.344	6.96804e-164	-1.17481
Sbds	0.379	0.364	7.25959e-164	0.531549
Acvrl1	0.415	0.332	7.55166e-164	0.701738
Pfn1	0.857	0.957	2.73983e-163	-0.768379
Ctsa	0.199	0.516	1.55488e-162	-0.816686
Lpar6	0.333	0.165	1.88231e-162	0.859408
P4hb	0.23	0.559	2.22475e-162	-0.645156
Eva1b	0.568	0.407	3.19445e-162	0.754486
Psap	0.862	0.893	1.53013e-161	-0.77658
Dram2	0.353	0.289	2.52349e-161	0.583573
Igf1	0.038	0.294	3.96319e-161	-0.914026
Znrf1	0.309	0.162	1.06156e-160	0.715558
Vamp3	0.387	0.325	1.63349e-160	0.573249
Xiap	0.339	0.254	2.01184e-160	0.620844
Rps27rt	0.749	0.932	1.17246e-159	-0.659971
Bvht	0.255	0.088	2.0497e-159	0.733473
Sec62	0.745	0.697	2.74091e-159	0.589743
Pgrmc1	0.368	0.345	4.40173e-159	0.515817
Gimap5	0.305	0.073	5.10535e-159	0.852934
Pxdn	0.267	0.138	6.6025e-159	0.681207
Vgll4	0.408	0.293	7.81944e-159	0.731123
Tap2	0.357	0.237	5.83684e-158	0.701927
C1qc	0.068	0.289	2.32076e-157	-2.47711
Tmem123	0.418	0.351	3.37102e-157	0.603454
Tjp1	0.251	0.098	4.85119e-157	0.690887
Syne2	0.291	0.119	9.22381e-157	0.783376
Fzd4	0.266	0.111	1.30353e-156	0.749937
Tuba1a	0.863	0.675	1.6216e-156	0.640681
Nr4a1	0.097	0.387	2.15294e-156	-0.97728
Abca8a	0.05	0.312	2.26566e-156	-1.03532
Fibin	0.029	0.269	8.40557e-156	-1.03445
Trps1	0.063	0.331	9.31791e-156	-0.574992
Prkd2	0.261	0.079	1.43783e-155	0.769739
Gm10263	0.29	0.606	1.92014e-155	-0.520325
Elovl5	0.312	0.167	2.22777e-155	0.756651
Rps16	0.988	0.998	7.52286e-155	-0.544889
Rassf3	0.309	0.132	2.14638e-154	0.776579
Tmbim6	0.845	0.802	3.29127e-154	0.560347
P3h3	0.023	0.259	4.69874e-154	-0.665108
Phlda1	0.116	0.412	2.28435e-153	-0.946043
Selenbp1	0.038	0.287	5.85042e-153	-0.845033
Mbnl2	0.51	0.483	7.16346e-153	0.542525
Rps27	0.997	0.999	1.38993e-152	-0.642118
Lxn	0.266	0.186	1.4977e-152	0.588955
Ceacam1	0.285	0.076	1.25232e-151	0.821315
Dennd5b	0.289	0.088	1.94524e-151	0.814803
Fbxo22	0.287	0.217	2.63903e-151	0.563225
Mmp23	0.026	0.26	9.0827e-151	-0.708851
Dnaja1	0.79	0.78	2.1328e-150	0.619239
Dpep1	0.08	0.317	3.77894e-150	-1.57378
Arhgef12	0.268	0.167	5.79542e-150	0.610276
Cpq	0.068	0.335	5.83411e-150	-0.817545
Mesdc1	0.308	0.188	1.52026e-149	0.660836
Psmb10	0.489	0.462	9.44946e-149	0.537136
Pmp22	0.193	0.446	1.76912e-148	-1.19413
Cdc42ep2	0.386	0.238	2.61649e-148	0.756214
Sec61g	0.682	0.894	5.16668e-148	-0.621836
Smim10l1	0.394	0.354	5.62973e-148	0.53372
Eln	0.061	0.298	5.92531e-148	-1.54449
Tspan3	0.109	0.392	8.29281e-148	-0.665425
Msn	0.727	0.708	1.09794e-147	0.53364
Taok3	0.059	0.311	1.88368e-147	-0.54448
Limch1	0.28	0.093	1.93377e-147	0.80596
Fubp1	0.452	0.431	7.82297e-147	0.50448
Cxcl2	0.064	0.305	8.86497e-147	-2.53421
Asap2	0.279	0.106	1.13532e-146	0.731683
Adamts2	0.035	0.274	2.59019e-145	-0.792468
Ms4a4d	0.031	0.259	1.75908e-141	-0.817501
Wasl	0.306	0.247	2.02371e-141	0.537273
Ezr	0.048	0.292	1.29398e-140	-0.659253
Flna	0.163	0.442	1.32934e-140	-0.509589
Klf2	0.889	0.781	2.25712e-140	0.740583
Tspo	0.634	0.865	4.82465e-140	-0.628424
Col5a2	0.036	0.266	6.49291e-140	-0.944716
Cfl2	0.351	0.296	1.17253e-139	0.524687
Hyal2	0.256	0.094	1.83208e-139	0.687314
Tubb6	0.139	0.418	4.53049e-139	-0.530415
Lmo4	0.126	0.399	6.33573e-139	-0.617514
Rdx	0.556	0.523	1.36524e-138	0.56678
Pf4	0.098	0.314	2.57512e-138	-2.41962
Rgl2	0.277	0.172	3.22056e-138	0.594719
Phf11d	0.318	0.159	5.42184e-138	0.747384
Strn4	0.264	0.203	7.95009e-137	0.515451
Mxra8	0.089	0.346	8.63573e-137	-0.952561
Hpcal1	0.397	0.356	3.51317e-135	0.522491
Rell1	0.261	0.162	3.55888e-135	0.605768
Gbp2	0.306	0.138	4.5195e-135	0.814072
Pcsk6	0.051	0.284	5.55657e-135	-0.920529
Ptpn18	0.217	0.474	9.71466e-135	-1.03085
Cd44	0.08	0.323	2.65462e-134	-0.837841
Utrn	0.297	0.136	2.97099e-134	0.728918
Rbpj	0.074	0.322	3.74487e-134	-0.534545
Mcl1	0.305	0.588	3.85725e-134	-0.631334
Unc93b1	0.181	0.449	1.2644e-133	-0.898174
Prss23	0.035	0.261	1.40771e-133	-0.869374
Soat1	0.034	0.257	3.49788e-133	-0.578426
Gpx8	0.054	0.293	4.81969e-133	-0.657414
Rbpms	0.299	0.179	5.43007e-133	0.64617
Fbln5	0.059	0.301	5.95627e-133	-0.92622
Ccl7	0.048	0.266	1.09316e-132	-2.19731
Tnfaip2	0.043	0.273	1.35514e-132	-0.647085
Nbl1	0.038	0.26	1.71374e-132	-0.949675
Tnxb	0.044	0.275	3.16478e-132	-0.881001
Iqgap1	0.33	0.615	1.58992e-131	-0.546796
Eno1	0.426	0.666	1.87702e-131	-0.667317
Ece1	0.365	0.233	4.50343e-131	0.683886
Mecom	0.349	0.178	7.53367e-131	0.797554
Aldh1a1	0.035	0.254	2.61838e-130	-0.808926
Tsc22d3	0.296	0.578	2.71764e-130	-0.512156
Rhob	0.501	0.421	2.84612e-130	0.672787
Grn	0.431	0.657	4.03836e-130	-0.757394
Cndp2	0.127	0.392	2.20837e-129	-0.632663
S100a8	0.179	0.375	4.88356e-129	-2.67999
Tcn2	0.337	0.293	7.25733e-129	0.508172
Emp2	0.343	0.199	1.68626e-128	0.731348
Rasgrp2	0.394	0.179	1.91087e-128	0.81744
Nfix	0.081	0.331	4.99541e-128	-0.698505
Grasp	0.261	0.15	6.22812e-128	0.591919
Git2	0.356	0.284	7.26985e-128	0.577757
Ninj1	0.147	0.398	1.1018e-127	-0.827917
Ndufa4l2	0.041	0.255	1.37832e-127	-1.0779
Rpl22l1	0.671	0.875	8.48991e-127	-0.620545
Rpl12	0.831	0.934	8.98676e-127	-0.694493
Mpzl1	0.284	0.146	1.78681e-126	0.635497
Plscr1	0.259	0.124	5.5572e-126	0.702612
Ptpn1	0.185	0.457	5.62458e-126	-0.657287
Id2	0.166	0.43	6.50993e-126	-0.851227
Pla2g16	0.32	0.23	7.38576e-126	0.576656
Fam96a	0.185	0.459	9.38556e-126	-0.628237
Tspan4	0.314	0.253	1.0907e-125	0.541703
Erp29	0.38	0.66	2.46666e-125	-0.503234
Ace	0.068	0.309	6.28838e-125	-0.763019
Tpm1	0.472	0.375	5.7514e-124	0.910535
Pgam1	0.357	0.616	1.70258e-123	-0.549059
Mfge8	0.554	0.366	1.76118e-123	0.65534
Pcmtd1	0.318	0.269	3.60378e-123	0.506463
H2afz	0.598	0.807	3.7513e-123	-0.612564
Ggta1	0.255	0.113	7.56918e-123	0.682208
Ppic	0.528	0.323	1.31955e-122	0.756305
Nmi	0.288	0.224	9.80762e-122	0.531569
Tecpr1	0.274	0.148	1.9634e-121	0.647987
Grap	0.318	0.133	4.0602e-121	0.707948
Adamts1	0.287	0.142	4.51502e-120	0.881133
Clta	0.628	0.834	9.08266e-120	-0.500282
Fgfr1	0.057	0.283	3.51258e-119	-0.58139
Fhl1	0.056	0.279	2.94255e-118	-0.698143
Mmp14	0.078	0.315	3.94391e-118	-0.568168
C3	0.045	0.251	1.40783e-117	-0.947117
Rps15a	0.977	0.994	1.51722e-117	-0.576575
Pkm	0.623	0.807	2.01687e-117	-0.645341
Gm9843	0.705	0.877	5.82227e-117	-0.595303
Fbn1	0.103	0.328	3.47513e-116	-0.993095
Arrb2	0.046	0.258	1.57535e-115	-0.562771
Rpl10a	0.899	0.969	1.58964e-115	-0.522037
Tmed3	0.286	0.562	1.27338e-114	-0.537303
Dbi	0.512	0.757	3.70028e-114	-0.545016
H1f0	0.431	0.372	3.78573e-113	0.628499
Socs3	0.205	0.475	4.93888e-113	-0.737845
Aebp1	0.058	0.278	5.49022e-113	-0.74272
Pgd	0.091	0.322	2.16389e-112	-0.524458
Kdelr3	0.053	0.269	3.29925e-112	-0.622646
Rps13	0.965	0.988	1.04461e-111	-0.515497
Atf3	0.129	0.371	1.58418e-111	-1.05657
Nudt4	0.294	0.205	2.22401e-111	0.598399
Rps18-ps3	0.313	0.578	3.76856e-111	-0.551538
Timp3	0.612	0.383	4.5877e-111	0.509619
Fbln2	0.223	0.407	6.79091e-111	-1.1068
Pam	0.165	0.399	1.28009e-110	-0.996663
Rap2b	0.069	0.286	2.27572e-109	-0.546879
Adamts5	0.101	0.309	4.33514e-109	-1.06675
Vamp5	0.349	0.238	5.1701e-108	0.608659
Tgfb1i1	0.312	0.218	8.96252e-108	0.553448
Camk2n1	0.088	0.307	1.1392e-107	-0.826513
Rgs3	0.323	0.201	2.41955e-107	0.620037
Actr3	0.524	0.736	1.46505e-105	-0.588249
Fosb	0.222	0.483	1.62681e-105	-0.540653
Irf1	0.323	0.206	3.26093e-105	0.611423
St3gal6	0.28	0.14	3.04688e-104	0.628361
Ablim1	0.39	0.249	2.34105e-103	0.661365
Nfkbiz	0.078	0.293	3.03303e-101	-0.616902
Pitpna	0.303	0.546	5.58831e-101	-0.545279
Hspa5	0.643	0.815	8.08581e-101	-0.632428
Hist1h2bc	0.41	0.322	1.11118e-100	0.662273
Sdcbp	0.541	0.721	2.49459e-100	-0.501373
Gadd45b	0.09	0.31	3.31032e-100	-0.55275
Neat1	0.482	0.714	8.70191e-100	-0.52297
Il11ra1	0.122	0.346	1.15886e-99	-0.634544
Htra1	0.071	0.277	2.97772e-99	-0.68729
Cited2	0.112	0.328	1.83777e-98	-0.535468
Rpl13a	0.99	0.996	2.58618e-98	-0.504693
Fam198b	0.312	0.219	2.85986e-98	0.579606
Emp1	0.291	0.525	4.066e-98	-0.771841
Nrros	0.075	0.28	3.26655e-96	-0.644826
H2-Q7	0.352	0.165	3.29984e-96	0.694675
Cald1	0.637	0.417	1.55769e-95	0.577737
Mast4	0.372	0.264	9.73019e-95	0.596964
Pmepa1	0.078	0.282	3.63428e-94	-0.601315
Ifi204	0.085	0.286	2.32074e-90	-0.563552
Lama4	0.325	0.247	4.0818e-90	0.52387
Hsp90b1	0.578	0.784	1.13014e-89	-0.51849
Plin2	0.288	0.468	1.13742e-89	-0.673214
Zfp36	0.371	0.62	3.91293e-89	-0.5014
Hes1	0.48	0.361	1.14807e-87	0.768192
S100a9	0.148	0.276	1.31837e-85	-2.23524
Psmb9	0.36	0.287	5.15043e-85	0.51998
Ier3	0.241	0.469	3.00604e-84	-0.831537
Ckb	0.311	0.533	4.54887e-84	-0.631521
Lpl	0.643	0.466	1.21851e-80	0.505676
Slfn2	0.203	0.424	7.9466e-79	-0.692841
Gas6	0.535	0.395	9.38852e-78	0.562025
Atf5	0.115	0.293	1.10037e-74	-0.668531
Cxcl16	0.202	0.379	1.71521e-73	-0.595381
Actb	0.995	0.998	4.13561e-73	-0.750017
S100a11	0.808	0.904	8.74351e-72	-0.525652
Cst3	0.966	0.952	3.91815e-70	-0.551756
Pltp	0.358	0.271	1.03753e-69	0.504511
Tmsb10	0.867	0.951	5.06568e-69	-0.524114
Hcls1	0.145	0.333	2.18057e-64	-0.546599
Csrp2	0.133	0.283	3.18216e-64	-0.62452
Crip1	0.915	0.95	1.1188e-62	-0.621094
Tmem176b	0.173	0.332	4.21438e-61	-0.777794
Tppp3	0.199	0.374	9.78894e-61	-0.671242
Gda	0.151	0.32	1.26933e-60	-0.507495
Lamc1	0.231	0.379	1.83629e-57	-0.581511
Socs2	0.424	0.321	5.26292e-57	0.504474
Dusp1	0.678	0.766	5.89763e-54	-0.540424
Prkcdbp	0.593	0.432	2.78065e-53	0.509354
Egr1	0.401	0.565	2.96938e-51	-0.574839
Ucp2	0.277	0.445	9.91857e-51	-0.560543
Dab2	0.255	0.371	1.13014e-50	-0.554416
Fxyd6	0.449	0.317	1.85102e-49	0.585125
Isg15	0.302	0.227	4.68856e-49	0.705598

## Sheet: F-SL vs rest
Gene	pct.1	pct.2	p_val_adj	Log2FoldChange
Smoc2	0.976	0.239	0	2.79663
Cxcl14	0.397	0.084	0	2.79077
Dcn	1	0.561	0	2.75212
Dpep1	0.953	0.189	0	2.74447
Hsd11b1	0.838	0.123	0	2.69992
Gpx3	0.993	0.318	0	2.55732
Crispld2	0.963	0.212	0	2.52488
Htra3	0.991	0.299	0	2.48956
Gsn	1	0.783	0	2.47273
Clec3b	0.987	0.218	0	2.46519
Serping1	0.99	0.299	0	2.24781
G0s2	0.92	0.22	0	2.20045
Cxcl1	0.558	0.152	0	2.10409
Gas1	0.926	0.222	0	2.0922
Rarres2	0.972	0.274	0	2.04983
Gsta3	0.765	0.097	0	2.02132
Lpl	0.96	0.424	0	2.00536
Ogn	0.932	0.23	0	1.97585
Gpm6b	0.91	0.203	0	1.9489
Adamts5	0.873	0.196	0	1.93864
Lum	0.982	0.334	0	1.92314
Mgp	0.996	0.584	0	1.91395
Pcolce	0.975	0.325	0	1.885
Gstm1	0.982	0.463	0	1.86263
Ms4a4d	0.84	0.14	0	1.84601
Abca8a	0.877	0.19	0	1.8381
Cygb	0.967	0.259	0	1.81985
Inmt	0.333	0.026	0	1.78088
Igfbp4	0.982	0.377	0	1.77552
H2B-EGFP	0.842	0.173	0	1.74306
Lhfp	0.962	0.274	0	1.73217
Col6a1	0.928	0.247	0	1.72364
Mmp2	0.918	0.241	0	1.71414
Rnase4	0.97	0.415	0	1.69083
Aldh1a1	0.771	0.145	0	1.68234
Col6a2	0.893	0.231	0	1.66441
Fbln1	0.882	0.229	0	1.66393
Entpd2	0.887	0.212	0	1.65275
Sdc2	0.893	0.232	0	1.6478
Nid1	0.926	0.297	0	1.64386
Prss23	0.719	0.16	0	1.59792
Rcn3	0.899	0.263	0	1.57833
Prelp	0.884	0.223	0	1.57689
Cp	0.767	0.168	0	1.53362
Bgn	0.996	0.387	0	1.49922
Bicc1	0.8	0.182	0	1.496
Dpt	0.956	0.269	0	1.49165
Angptl2	0.737	0.172	0	1.49072
Loxl1	0.935	0.256	0	1.47485
Lamc1	0.879	0.284	0	1.47439
Spon2	0.595	0.12	0	1.46811
Htra1	0.734	0.179	0	1.46229
Meg3	0.797	0.216	0	1.45315
Adm	0.435	0.063	0	1.45223
Rhoj	0.86	0.294	0	1.44868
Cfh	0.908	0.314	0	1.44112
Col15a1	0.855	0.252	0	1.44065
Cd63	0.989	0.496	0	1.43867
Slc43a3	0.837	0.307	0	1.42825
Atp1a2	0.705	0.114	0	1.4209
Tnxb	0.777	0.166	0	1.41342
Serpinf1	0.892	0.262	0	1.41239
Oaf	0.819	0.232	0	1.41191
Col6a3	0.703	0.148	0	1.411
Serpine2	0.856	0.224	0	1.40076
Cpq	0.787	0.228	0	1.39286
Lamb1	0.737	0.192	0	1.37843
Pcsk6	0.772	0.177	0	1.37689
Enpp2	0.574	0.077	0	1.36787
Ifi205	0.565	0.102	0	1.36244
Pmp22	0.938	0.335	0	1.35977
Lama2	0.72	0.168	0	1.35637
Cd302	0.892	0.404	0	1.35049
Zbtb20	0.972	0.48	0	1.35016
Olfml3	0.809	0.264	0	1.34897
Fxyd1	0.878	0.241	0	1.33398
Plxdc2	0.71	0.19	0	1.33227
Spry1	0.679	0.159	0	1.32951
Selenbp1	0.693	0.189	0	1.32871
Mxra8	0.832	0.236	0	1.32859
Ccdc80	0.956	0.317	0	1.30617
Selm	0.961	0.411	0	1.30458
Rbp1	0.925	0.27	0	1.29916
Islr	0.759	0.191	0	1.2797
Atf5	0.687	0.209	0	1.2785
Mgst1	0.834	0.309	0	1.27842
Camk2n1	0.776	0.205	0	1.27268
Serpinh1	0.983	0.506	0	1.27066
Ace	0.743	0.209	0	1.26369
Gstt1	0.652	0.134	0	1.25381
Pla1a	0.593	0.135	0	1.23914
Nmb	0.407	0.05	0	1.23056
Pdgfra	0.609	0.126	0	1.22628
Medag	0.731	0.186	0	1.22227
Ppp1r14a	0.577	0.114	0	1.21253
Srpx2	0.633	0.147	0	1.20358
Snhg18	0.751	0.197	0	1.2015
Cyb5a	0.949	0.624	0	1.18817
Spon1	0.563	0.092	0	1.18772
Nfia	0.757	0.27	0	1.17953
Il11ra1	0.737	0.254	0	1.17455
Heyl	0.544	0.103	0	1.15072
Fibin	0.649	0.177	0	1.14849
Klf9	0.835	0.331	0	1.14196
Igfbp6	0.773	0.29	0	1.14169
Aldh2	0.926	0.585	0	1.12601
C1s1	0.509	0.089	0	1.1201
Tuba1a	0.982	0.662	0	1.11689
Sparcl1	0.971	0.464	0	1.11522
Ndufa4l2	0.711	0.156	0	1.10674
C1ra	0.512	0.097	0	1.10074
Pcolce2	0.743	0.203	0	1.1005
Tpst1	0.731	0.255	0	1.09305
Fbln5	0.693	0.206	0	1.08973
Fbln2	0.887	0.309	0	1.08216
Matn2	0.627	0.158	0	1.07295
Ltbp4	0.93	0.42	0	1.05424
Scn7a	0.58	0.129	0	1.05072
Ndrg2	0.61	0.156	0	1.05005
Ptgis	0.75	0.22	0	1.04319
Sod3	0.706	0.211	0	1.02882
Igfbp7	1	0.674	0	1.0143
Timp2	0.947	0.455	0	1.00677
Penk	0.333	0.023	0	1.00518
Mmp23	0.632	0.169	0	0.997401
Nenf	0.903	0.454	0	0.989803
Eln	0.733	0.198	0	0.959726
Col1a2	0.982	0.314	0	0.91454
Cd34	0.946	0.455	0	0.854717
Gfra1	0.344	0.027	0	0.839546
Col1a1	0.974	0.267	0	0.823251
Pi16	0.814	0.336	0	0.818687
S100a6	0.999	0.821	0	0.795007
Col3a1	0.982	0.384	0	0.789897
Fstl1	0.885	0.301	0	0.589775
Col8a1	0.674	0.215	0	0.562541
Tm4sf1	0.737	0.48	0	-0.859814
Gng11	0.759	0.492	0	-0.925014
Ftl1	1	0.993	0	-0.969558
Cfl1	0.902	0.959	0	-1.13363
Calm1	0.915	0.966	0	-1.26922
Arpc2	0.772	0.893	0	-1.30153
Actr3	0.48	0.738	0	-1.33487
Cyba	0.792	0.84	0	-1.38501
Pfn1	0.91	0.947	0	-1.45777
Fxyd5	0.542	0.731	0	-1.51834
Ctsb	0.874	0.804	0	-1.55914
Ucp2	0.041	0.476	0	-1.6108
Ptpn18	0.051	0.492	0	-1.74862
Lcp1	0.028	0.442	0	-1.76536
Sh3bgrl3	0.691	0.898	0	-1.83249
Cd53	0.027	0.49	0	-2.09264
Laptm5	0.038	0.482	0	-2.11369
Cotl1	0.235	0.573	0	-2.13921
Ly6c1	0.402	0.454	0	-2.26414
Coro1a	0.055	0.516	0	-2.52625
Tmsb4x	0.999	1	0	-2.56399
Ctsc	0.039	0.448	0	-2.73851
Srgn	0.122	0.705	0	-2.98523
Lgals3	0.056	0.445	0	-3.18136
H2-Ab1	0.255	0.449	0	-3.31413
Cd52	0.128	0.579	0	-3.40485
Tyrobp	0.156	0.525	0	-3.45942
Fabp4	0.758	0.677	0	-3.53255
Ctss	0.077	0.528	0	-3.62587
Fcer1g	0.132	0.519	0	-3.67931
Cd74	0.316	0.472	0	-4.62027
Lyz2	0.449	0.688	0	-4.94617
Colec12	0.514	0.112	7.7439849329157e-320	0.961152
Pdlim2	0.78	0.299	1.54879698658314e-319	1.04874
Rem1	0.465	0.079	1.31647743859567e-318	0.94741
Btg1	0.606	0.821	5.26590975438267e-318	-1.68103
Kdelr3	0.636	0.182	1.91431307541676e-316	1.06298
Cpxm1	0.43	0.075	1.42388650961521e-315	1.02882
Clic1	0.734	0.871	8.13273297654807e-315	-1.03389
Ar	0.466	0.083	1.05582264973866e-314	0.904548
Ctsd	0.768	0.739	7.3736753174086e-314	-1.44861
Rac2	0.044	0.451	8.7230027400897e-314	-1.79587
Fth1	1	0.992	1.34653594843233e-312	-0.64617
Lgmn	0.202	0.494	2.07602203950771e-312	-2.40794
Alox5ap	0.041	0.417	8.09327892211185e-312	-2.34367
C1qtnf7	0.552	0.135	1.66347410581744e-309	1.02204
Axl	0.776	0.302	4.27924718045647e-309	0.912415
Gngt2	0.089	0.501	2.16816434113255e-308	-1.6718
Nnmt	0.584	0.154	8.29462079677596e-308	1.00145
Nupr1	0.822	0.362	2.62665e-307	1.06447
Col5a3	0.46	0.085	6.85842e-307	0.965912
Fbn1	0.666	0.244	2.4917e-305	0.562782
Gpx1	0.741	0.808	1.15717e-304	-1.25656
Fkbp7	0.688	0.233	1.23128e-304	1.03936
Rgs17	0.324	0.029	3.08951e-304	0.834271
Bmp4	0.464	0.091	2.01491e-303	1.04877
Scara5	0.492	0.096	4.83699e-302	0.906184
Gpx8	0.664	0.202	1.02023e-301	0.92217
F3	0.411	0.066	2.83968e-300	0.9466
Fam49b	0.072	0.464	2.98964e-300	-1.56572
Msc	0.361	0.05	2.1115e-297	0.990636
Aebp1	0.644	0.191	4.5288e-297	0.980525
Itm2a	0.582	0.153	1.34435e-296	1.0635
Cstb	0.595	0.626	7.79148e-293	-1.34369
H2-Aa	0.221	0.392	4.14487e-291	-3.38764
Wfdc17	0.079	0.424	5.9228e-291	-2.8721
P3h3	0.601	0.173	1.03907e-290	0.960285
Malat1	1	0.998	3.07479e-290	0.608545
Thbs2	0.474	0.096	2.96838e-289	0.925319
C1qtnf2	0.564	0.15	5.85347e-288	0.986926
Akap12	0.655	0.211	1.61562e-285	1.00589
Pam	0.774	0.309	7.1269e-284	0.980377
Cyp27a1	0.454	0.107	3.43729e-277	0.889033
Nrxn2	0.376	0.058	4.5215e-277	0.840373
Fgfr1	0.627	0.198	6.08512e-277	0.941101
Lgals1	0.991	0.772	1.08035e-275	0.518507
Gstm2	0.589	0.178	1.78916e-274	0.993126
Vwa1	0.731	0.289	6.66666e-274	0.844746
Gpc6	0.549	0.148	1.90879e-273	0.951412
Msn	0.462	0.746	3.37813e-272	-1.12828
Sdcbp	0.57	0.713	1.04779e-271	-1.14251
Ccl6	0.046	0.391	1.27597e-271	-3.20415
Jund	0.966	0.789	3.6881e-270	1.0454
Spi1	0.026	0.386	4.82453e-269	-1.63851
Ecm2	0.596	0.181	7.94826e-269	0.977558
Vcam1	0.559	0.158	9.64867e-269	0.964597
Lpar1	0.577	0.165	1.36268e-268	0.894259
Ms4a6c	0.024	0.373	5.40484e-267	-2.07424
Podn	0.382	0.061	2.72603e-266	0.836498
Hspg2	0.792	0.343	3.43955e-266	0.916991
Nfix	0.681	0.241	5.09361e-266	0.863711
Arpc1b	0.942	0.925	5.93623e-266	-0.878162
Rora	0.585	0.179	2.12796e-265	0.9322
H2-Eb1	0.17	0.341	3.20604e-265	-3.13222
Ddah2	0.8	0.351	3.56154e-265	0.829026
Egr1	0.838	0.5	5.13679e-265	1.30521
Nedd4	0.795	0.344	6.10952e-264	0.848752
Ngf	0.474	0.106	3.95256e-263	0.974415
Actg1	0.977	0.987	6.17825e-262	-1.02549
Arhgdib	0.404	0.623	1.56302e-261	-1.35994
C3	0.554	0.175	2.21334e-261	1.42664
Rbms3	0.513	0.134	4.60793e-261	0.913396
Rab34	0.538	0.153	1.18365e-260	0.868008
Fhl1	0.612	0.196	2.13054e-259	0.845697
Slfn2	0.067	0.439	3.81835e-259	-1.50237
Sgce	0.603	0.194	6.72805e-258	0.88733
Tcf21	0.508	0.127	4.32257e-257	0.851694
Fcgr3	0.03	0.366	5.85683e-257	-1.89
Pdgfrb	0.45	0.129	5.44346e-256	0.542354
Ptprc	0.026	0.381	1.33265e-254	-1.38697
Cd68	0.024	0.367	2.16199e-254	-1.83053
Slc25a5	0.556	0.777	6.56226e-253	-1.11436
Ltbp1	0.422	0.088	1.69688e-252	0.82062
Actb	0.996	0.998	6.21066e-252	-1.55858
Fmo2	0.443	0.092	9.78335e-252	0.861786
Fyb	0.026	0.365	1.17297e-251	-1.41775
Col4a1	0.809	0.391	6.54193e-251	0.627532
Tspan13	0.094	0.419	1.13638e-250	-1.96927
Tpd52	0.046	0.402	2.4275e-250	-1.45742
Ccl9	0.036	0.362	2.6163e-250	-2.63513
Lst1	0.046	0.384	5.48799e-249	-1.8607
Psap	0.927	0.883	1.78052e-248	-1.03022
Slc1a5	0.606	0.221	1.84588e-248	0.925364
Lilrb4a	0.008	0.337	8.87254e-248	-1.66531
Tspan3	0.719	0.3	1.05712e-247	0.860982
6030408B16Rik	0.422	0.084	8.1638e-246	0.924276
Hcls1	0.011	0.348	7.78705e-245	-1.1096
Drap1	0.776	0.425	1.85362e-244	0.909823
Cd36	0.181	0.394	1.05422e-243	-2.30687
Tmed3	0.851	0.477	2.80923e-243	0.863396
Atox1	0.781	0.833	4.08534e-243	-0.87914
Fcgrt	0.804	0.405	4.09104e-243	0.88619
Emilin1	0.668	0.258	1.13626e-242	0.913863
Copz2	0.66	0.246	1.47744e-242	0.893099
Clmp	0.506	0.149	2.71614e-241	0.900203
Mtch1	0.877	0.518	4.14033e-239	0.84557
Vkorc1	0.736	0.337	6.07426e-239	0.905469
Phlda1	0.732	0.319	1.07647e-238	1.04572
Adamts2	0.577	0.192	2.59626e-238	0.67842
H3f3a	0.955	0.97	3.65301e-238	-0.815274
H2afz	0.702	0.788	1.20141e-237	-1.07389
Gmfg	0.028	0.37	2.32282e-237	-1.32552
Igsf3	0.397	0.085	2.65013e-237	0.760922
Sdpr	0.241	0.326	1.34651e-236	-1.82949
Cryab	0.605	0.213	1.23745e-235	0.729063
Pabpc1	0.721	0.83	4.43281e-235	-0.968536
Ms4a6b	0.015	0.34	5.32056e-234	-1.45562
Sub1	0.701	0.792	2.99192e-233	-0.931341
Txndc5	0.754	0.347	4.95017e-233	0.835603
Plpp3	0.789	0.385	8.99448e-233	0.557353
Ms4a6d	0.01	0.324	3.17072e-232	-1.7244
Abi3bp	0.49	0.133	4.70095e-232	0.787812
Ostf1	0.549	0.752	8.7647e-232	-0.972729
Fabp5	0.316	0.507	8.85133e-232	-1.94602
Itgb2	0.01	0.33	6.09849e-231	-1.23981
Tgfb1	0.216	0.55	5.5981e-230	-1.1461
B3gnt9	0.415	0.104	4.01075e-229	0.763846
Rcn1	0.623	0.226	2.02683e-228	0.845872
Fn1	0.189	0.446	4.98276e-228	-1.98521
Ccr2	0.012	0.32	5.12569e-228	-1.89528
Lyn	0.066	0.401	5.50337e-227	-1.15153
C1qb	0.128	0.332	7.87212e-226	-3.02355
Ctsl	0.965	0.716	7.8883e-226	0.651607
Spp1	0.025	0.346	1.30559e-224	-3.84918
Gnai2	0.826	0.881	4.36263e-223	-0.80422
Ly86	0.008	0.314	2.65315e-222	-1.37461
Cd93	0.039	0.355	3.12402e-222	-1.34809
Gpihbp1	0.202	0.323	6.73872e-222	-2.05371
Rgs2	0.059	0.388	8.62921e-222	-1.57847
Sfrp1	0.518	0.161	1.497e-221	0.726764
Ces1d	0.34	0.054	3.03067e-221	0.91418
Ndn	0.488	0.14	3.89736e-221	0.837747
Fkbp9	0.649	0.251	2.97704e-220	0.849517
Ifi30	0.155	0.426	3.77706e-220	-1.49479
Cyth3	0.616	0.233	9.99993e-220	0.836636
Lrp1	0.841	0.458	1.27033e-219	0.820412
Phlda3	0.659	0.256	5.6046e-219	0.786316
D630003M21Rik	0.295	0.044	2.38162e-218	0.687942
S100a8	0.321	0.351	2.53193e-218	-2.77496
Cd14	0.033	0.325	4.63687e-218	-1.93877
Nfib	0.77	0.37	2.51711e-217	0.611743
Jun	0.909	0.739	5.08096e-217	1.25133
Cd48	0.013	0.321	1.64025e-216	-1.13233
Arpc3	0.757	0.861	3.82977e-216	-0.837805
Gm9843	0.796	0.861	4.94321e-215	-0.966131
Ctsh	0.24	0.473	2.35176e-214	-1.42183
Il17d	0.361	0.07	3.75599e-214	0.715418
Slc9a3r2	0.358	0.337	6.88811e-214	-0.962415
C5ar1	0.013	0.313	1.75897e-213	-1.81216
Tm6sf1	0.022	0.333	2.67269e-213	-1.03882
Fcgr2b	0.015	0.316	3.11782e-213	-1.32417
Ptpn6	0.017	0.322	4.51828e-213	-1.10955
Slc6a6	0.113	0.431	8.14676e-213	-1.32095
Tcf4	0.923	0.615	1.18877e-212	0.536272
AF251705	0.01	0.308	3.58872e-212	-1.30873
Anxa5	0.967	0.8	2.83754e-211	0.724034
Slc29a1	0.673	0.302	6.0508e-211	0.873466
Aspn	0.583	0.225	6.22154e-211	0.536092
Bmper	0.257	0.032	2.04379e-209	0.600927
Efhd2	0.175	0.46	2.73285e-209	-1.22798
Mxra7	0.638	0.247	3.99728e-209	0.786422
Pld4	0.016	0.31	4.25948e-208	-1.23072
Cav1	0.14	0.337	1.96501e-207	-1.97494
Kcnk2	0.359	0.069	3.15946e-206	0.850695
Stk17b	0.057	0.362	2.8659e-205	-1.1828
Ggt5	0.334	0.058	9.34779e-205	0.690724
Mpeg1	0.02	0.315	6.29438e-204	-1.30343
Thra	0.635	0.258	9.02759e-204	0.703427
Arpc5	0.624	0.752	5.99773e-203	-0.878805
Eno1	0.474	0.654	8.84023e-203	-1.06176
B2m	0.994	0.992	9.80498e-200	-0.783161
Fam105a	0.01	0.296	1.47484e-199	-1.02454
Slco2b1	0.338	0.062	2.57553e-199	0.675594
Gapdh	0.868	0.893	1.15077e-198	-0.871504
Plek	0.016	0.302	7.39557e-198	-1.16082
Cybb	0.016	0.3	2.29575e-197	-1.27175
Psmb8	0.4	0.636	8.82252e-197	-1.03328
Timp3	0.756	0.367	1.95603e-196	0.666653
Aif1	0.027	0.301	2.36748e-196	-1.50778
Scarf2	0.379	0.1	1.28655e-195	0.709903
Clta	0.766	0.811	2.04905e-195	-0.761164
Nav1	0.641	0.274	2.14282e-195	0.824207
Slc25a4	0.917	0.611	4.09995e-195	0.665843
Naalad2	0.42	0.114	1.5259e-194	0.713765
Il1b	0.041	0.32	2.32403e-194	-2.57501
Capzb	0.641	0.78	2.37248e-194	-0.824939
Ncf2	0.015	0.296	3.68676e-194	-1.01073
AI662270	0.006	0.278	7.68543e-194	-0.931391
Skap2	0.038	0.342	1.46163e-193	-0.995609
Tmem64	0.454	0.14	1.53874e-193	0.828978
Selplg	0.02	0.308	2.0759e-192	-1.10003
Unc93b1	0.208	0.44	1.39326e-190	-1.10634
Ly6e	0.906	0.906	2.9448e-190	-0.982352
AB124611	0.007	0.275	1.08587e-189	-0.914298
C1qc	0.085	0.282	2.12452e-189	-2.57957
Rgma	0.349	0.08	3.19081e-189	0.688932
Ghr	0.472	0.148	4.02212e-189	0.734358
Csf1r	0.035	0.317	7.58984e-189	-1.30424
Ebf2	0.407	0.106	3.0993e-188	0.695855
Clec4a2	0.007	0.275	3.10575e-188	-1.15791
Calu	0.715	0.344	3.66358e-188	0.76584
Col5a1	0.496	0.164	3.76801e-188	0.628831
Kazald1	0.398	0.101	3.95781e-188	0.726055
Fcgr1	0.005	0.265	1.37091e-187	-1.17839
Ncf4	0.008	0.272	8.20781e-186	-0.913963
Arhgap30	0.002	0.258	8.38845e-186	-0.824102
Nrros	0.011	0.285	8.59928e-186	-0.923703
Serpinb6a	0.794	0.424	4.16345e-185	0.619017
Abca6	0.302	0.056	4.70368e-185	0.657704
Capza2	0.585	0.718	1.13847e-184	-0.834132
Pde1a	0.417	0.117	1.16879e-184	0.701603
Cxcl12	0.382	0.343	1.90237e-184	-1.40694
Grn	0.622	0.625	3.83625e-184	-0.776165
Pitpna	0.312	0.54	9.28024e-184	-0.944863
Emb	0.009	0.272	6.57504e-183	-1.059
P3h4	0.443	0.135	4.57908e-182	0.715978
Cyth4	0.01	0.276	5.65449e-182	-0.889956
Pycard	0.118	0.41	6.38081e-182	-1.06164
H2-D1	0.969	0.973	1.56805e-181	-0.839766
Clec4a3	0.009	0.27	1.92216e-181	-1.12802
H2-DMa	0.038	0.319	1.98474e-181	-1.40388
Plekho1	0.013	0.281	5.02126e-181	-0.81116
S100a4	0.231	0.439	9.36957e-181	-1.69749
Svep1	0.341	0.076	8.04518e-180	0.687847
C1qa	0.101	0.293	2.19421e-179	-2.88146
Mgll	0.135	0.319	3.00472e-179	-1.8328
Ifi27	0.837	0.499	6.22767e-179	0.725756
Prdx5	0.678	0.653	1.30869e-178	-0.673314
Plekha6	0.344	0.079	2.06727e-178	0.63678
Shisa5	0.667	0.794	2.0802e-178	-0.892835
Cxcl2	0.041	0.304	6.16139e-178	-2.89951
Pkm	0.777	0.782	3.43232e-177	-0.845786
Rabac1	0.947	0.729	4.50461e-177	0.618437
Col4a4	0.357	0.086	4.61792e-177	0.663162
Osr1	0.312	0.06	1.164e-176	0.779734
Laptm4a	0.962	0.781	9.82688e-176	0.54202
Slc44a1	0.515	0.196	1.38722e-175	0.734248
Vsir	0.079	0.369	3.12832e-175	-0.981978
Taldo1	0.506	0.649	5.33656e-175	-0.863561
Gimap6	0.082	0.322	7.08183e-175	-1.39005
S1pr3	0.283	0.051	1.79291e-174	0.593855
Pf4	0.138	0.304	2.14518e-174	-2.57526
Gabarapl1	0.597	0.262	5.84811e-174	0.717182
Itgbl1	0.427	0.123	8.17315e-174	0.77037
Cdkn2c	0.468	0.163	1.64488e-173	0.742323
Tpm3	0.665	0.783	5.5116e-173	-0.776666
Esam	0.077	0.281	7.59213e-173	-1.63353
Msrb1	0.341	0.455	1.58912e-172	-1.00815
Creb3l1	0.373	0.103	4.80861e-172	0.66188
Sept8	0.5	0.191	1.75873e-171	0.719298
Ahnak2	0.513	0.185	1.83034e-171	0.652605
Frzb	0.397	0.109	3.33069e-171	0.680358
Rap1b	0.607	0.742	4.87759e-171	-0.824927
Chil3	0.016	0.262	7.75409e-171	-3.05041
Tnfaip8l2	0.008	0.258	1.00503e-169	-0.822942
Fau	0.997	0.994	1.22755e-169	-0.621561
Shfm1	0.892	0.894	1.38617e-169	-0.621069
Hes1	0.692	0.333	1.71115e-169	0.728832
Cfp	0.019	0.272	2.00939e-169	-1.27286
Lama4	0.556	0.215	3.28687e-169	0.709314
Zfyve21	0.494	0.187	2.59215e-168	0.658931
Smtnl2	0.365	0.094	4.57208e-168	0.626143
Cdc42ep5	0.433	0.138	5.99437e-167	0.677728
Ldha	0.76	0.808	1.215e-166	-0.798935
Limd2	0.094	0.342	2.23947e-166	-1.14898
Gm2a	0.43	0.516	3.73573e-166	-0.930474
Icam2	0.077	0.297	3.95907e-166	-1.47255
S100a9	0.226	0.263	1.81229e-165	-2.39487
Pirb	0.011	0.261	1.65833e-164	-0.877345
Igf1	0.555	0.216	5.79192e-164	0.831761
Egfl7	0.097	0.291	1.9036e-163	-1.76788
Plac8	0.051	0.303	2.20976e-163	-2.37036
Arf4	0.872	0.597	1.36601e-162	0.672017
Oat	0.7	0.379	1.62942e-162	0.739701
Marcksl1	0.047	0.311	5.16572e-162	-1.11616
Bcl2a1b	0.015	0.259	8.64362e-161	-1.31087
Wdr89	0.765	0.825	9.28226e-161	-0.756364
Tnfaip8	0.109	0.384	2.86942e-160	-0.906798
Fam96a	0.215	0.449	2.92672e-160	-0.837259
Pgf	0.364	0.093	3.40231e-160	0.774622
Myl6	0.966	0.967	4.13732e-160	-0.645082
Maged1	0.511	0.193	2.4052e-158	0.708717
Map1lc3a	0.708	0.368	3.72445e-158	0.635255
Npdc1	0.632	0.293	4.01654e-158	0.535543
Aqp1	0.155	0.26	2.70947e-157	-1.94352
Tgfbi	0.381	0.462	6.01659e-157	-1.39179
Nfic	0.738	0.403	8.57657e-157	0.686034
Efemp2	0.498	0.184	1.77747e-156	0.636679
Hic1	0.443	0.148	3.0608e-156	0.670033
Pecam1	0.079	0.288	8.38948e-156	-1.36442
Foxs1	0.294	0.066	4.84676e-155	0.57609
Abca8b	0.306	0.068	6.93975e-155	0.57615
Frmd6	0.345	0.094	1.34202e-154	0.609944
Cys1	0.305	0.073	2.16212e-154	0.551414
Plat	0.558	0.23	2.83266e-154	0.678778
Ms4a7	0.021	0.251	7.34068e-154	-1.87814
Arpc4	0.454	0.625	8.2544e-154	-0.791518
Pcdh9	0.269	0.058	2.51079e-153	0.549367
Cox5a	0.611	0.737	3.59307e-153	-0.706713
Aes	0.8	0.493	7.75233e-153	0.666648
Aprt	0.375	0.525	9.08275e-153	-0.84359
Tmem45a	0.405	0.128	2.01323e-152	0.587187
Cdh5	0.07	0.263	3.62114e-152	-1.48819
Rgcc	0.117	0.32	5.5269e-152	-1.50704
Emcn	0.08	0.251	1.16752e-151	-1.41735
AW112010	0.455	0.416	3.86335e-151	-0.854357
Ddr2	0.401	0.125	4.00251e-151	0.64926
Mef2c	0.261	0.479	2.59259e-150	-1.00405
Vgll3	0.306	0.076	6.34919e-150	0.590261
Lsamp	0.255	0.044	2.30797e-149	0.552706
Npc2	0.866	0.797	2.39203e-149	-0.529308
Ybx1	0.953	0.945	4.30573e-149	-0.599633
Actr2	0.36	0.562	9.56062e-149	-0.809008
Capg	0.502	0.566	1.30085e-148	-0.802245
Chpf	0.44	0.15	1.53393e-148	0.668669
Ikbip	0.463	0.176	2.28573e-148	0.652842
Gstm5	0.457	0.16	3.17217e-148	0.679077
Lims2	0.296	0.289	3.82715e-148	-0.698192
Hmgn1	0.794	0.462	8.79278e-148	0.57774
Tmem159	0.486	0.198	2.61217e-147	0.654172
Tgfbr3	0.339	0.093	7.0946e-147	0.615211
Ypel3	0.868	0.574	2.13473e-146	0.613998
Gpr153	0.375	0.119	2.17045e-146	0.641282
Ier2	0.851	0.746	2.60188e-146	0.980151
Sobp	0.261	0.059	6.4946e-146	0.521222
Hmgcs2	0.266	0.054	8.14907e-145	0.531366
Cav2	0.044	0.274	2.32866e-144	-1.21904
Plin2	0.33	0.459	2.35885e-144	-0.983697
Arl1	0.776	0.479	9.10431e-144	0.663771
Ly6a	0.656	0.591	9.51188e-144	-1.08802
Ncald	0.271	0.057	1.77501e-143	0.501298
Samhd1	0.152	0.395	2.095e-143	-0.923634
Evi2a	0.031	0.268	5.14014e-143	-0.812219
Sgcb	0.38	0.126	5.22524e-143	0.585622
Tbx20	0.41	0.14	1.77751e-142	0.597793
Cd44	0.071	0.32	2.6879e-142	-0.985289
Fli1	0.087	0.33	6.66084e-142	-0.854544
Vamp8	0.427	0.609	1.14395e-141	-0.742187
Cd200	0.103	0.31	1.34505e-141	-1.37016
Dab2	0.208	0.375	3.28416e-141	-1.06651
Hnrnpf	0.764	0.839	1.24862e-140	-0.654374
Qpct	0.442	0.158	4.89921e-140	0.630452
Jade1	0.423	0.146	5.55835e-140	0.649735
Ank2	0.31	0.087	9.72151e-140	0.560658
Eva1b	0.713	0.39	2.10327e-139	0.517629
Wbp5	0.77	0.455	4.60948e-137	0.600746
Ssbp2	0.439	0.17	2.98387e-136	0.595257
Iqgap1	0.39	0.601	8.84185e-136	-0.800219
Mn1	0.366	0.113	3.93043e-135	0.60736
Hspa8	0.968	0.976	3.08167e-134	-0.719926
Arhgef40	0.416	0.153	3.86077e-134	0.618174
Metrnl	0.184	0.394	5.41744e-134	-0.953755
Abracl	0.324	0.552	1.15766e-133	-0.768027
Fam114a1	0.405	0.147	3.57371e-133	0.599809
Zeb1	0.529	0.226	3.9258e-133	0.632762
Ptpn1	0.229	0.445	2.64683e-132	-0.826617
Tgfb2	0.318	0.09	2.99496e-132	0.604845
Snx5	0.324	0.459	5.16829e-132	-0.700715
Dact1	0.253	0.059	1.78965e-131	0.527665
Id1	0.224	0.317	3.78028e-131	-1.22065
Sepw1	0.953	0.784	7.18117e-131	0.503485
Lrrc32	0.295	0.071	9.81503e-131	0.562639
Prrx1	0.378	0.128	1.31676e-130	0.585673
Arhgap31	0.187	0.353	6.69448e-130	-0.957824
Lrrfip1	0.119	0.361	1.00839e-129	-0.773559
Steap3	0.337	0.11	1.46109e-129	0.56865
Hmox1	0.192	0.328	1.65934e-129	-1.90404
Nfkbia	0.515	0.677	3.72004e-129	-1.00728
Gm9780	0.39	0.133	3.92159e-128	0.585344
Mcl1	0.372	0.573	3.94876e-128	-0.816531
Maged2	0.449	0.178	2.61874e-126	0.576128
Itm2c	0.823	0.554	4.68389e-126	0.607383
Comt	0.726	0.444	3.0184e-125	0.642815
Vasp	0.338	0.526	7.26085e-125	-0.748456
Auts2	0.392	0.144	4.02255e-124	0.546068
BC028528	0.104	0.326	1.35028e-123	-0.841774
Lysmd2	0.431	0.167	1.44672e-122	0.555442
Mrc2	0.34	0.111	1.95316e-122	0.562952
Dag1	0.477	0.207	2.20469e-122	0.600183
Sntb2	0.502	0.227	2.228e-121	0.621282
Ctsa	0.365	0.487	3.94352e-121	-0.705969
Ctnnbip1	0.147	0.323	1.30689e-120	-0.803913
Tceal8	0.582	0.291	2.51666e-120	0.621481
Adk	0.364	0.137	5.74795e-120	0.553541
Rpl36al	0.883	0.89	8.17419e-120	-0.516911
Crlf2	0.137	0.37	1.88603e-119	-0.705259
Arl4c	0.064	0.29	2.62071e-119	-0.761029
Ptgfrn	0.378	0.138	6.02748e-119	0.573435
Tma7	0.67	0.763	9.35826e-119	-0.599514
Runx1t1	0.293	0.08	2.7189e-118	0.526272
Tbrg1	0.676	0.382	5.8208e-117	0.560196
H2-K1	0.858	0.871	2.81983e-116	-0.702398
Pik3r2	0.325	0.111	3.21447e-116	0.511729
Sgk1	0.258	0.363	8.54214e-116	-0.826774
Fndc3b	0.497	0.229	1.04687e-115	0.61349
Snai1	0.256	0.067	1.72654e-115	0.504857
Cnpy2	0.692	0.417	2.01623e-115	0.588895
Gas6	0.678	0.377	2.17611e-115	0.518784
Pim1	0.212	0.414	4.19394e-115	-1.05585
Gstp1	0.442	0.186	6.40292e-115	0.6025
Hmgb2	0.261	0.406	1.12469e-114	-0.828036
Ptov1	0.575	0.304	1.52354e-114	0.624434
Cped1	0.396	0.152	3.15779e-114	0.532851
Ywhah	0.594	0.697	6.40247e-114	-0.628185
Slc16a2	0.323	0.101	8.17833e-114	0.543664
Ninj1	0.255	0.378	3.63312e-113	-0.751988
Gsr	0.139	0.288	7.02357e-113	-0.821449
Tril	0.32	0.103	1.11828e-112	0.529668
Celf2	0.733	0.465	2.89695e-112	0.615571
Serpine1	0.335	0.116	6.46371e-112	1.0391
Cyr61	0.482	0.225	3.57264e-111	1.21636
Tuba1c	0.077	0.281	4.67764e-111	-0.70025
Tusc3	0.52	0.256	5.50472e-111	0.53477
Sept11	0.573	0.296	5.91802e-111	0.621748
Itpkb	0.139	0.311	7.27199e-111	-0.826362
Meis2	0.295	0.09	8.72358e-111	0.508988
Adam15	0.234	0.403	9.21953e-111	-0.730011
Card19	0.234	0.414	1.014e-110	-0.70116
Il10rb	0.28	0.445	2.15867e-110	-0.660605
Tagln2	0.822	0.823	3.59903e-110	-0.588938
Wipi1	0.363	0.137	3.60606e-110	0.5495
Rnf130	0.237	0.415	4.08795e-110	-0.636185
Ier3	0.302	0.456	1.5438e-109	-1.16856
Apod	0.263	0.066	4.97778e-109	0.646071
Ptp4a3	0.276	0.357	1.67216e-108	-0.680966
Atraid	0.723	0.449	2.21768e-108	0.562363
Tnfsf12	0.564	0.294	3.49872e-108	0.532957
Myh9	0.222	0.445	3.5645e-108	-0.778991
Srpx	0.264	0.08	5.38847e-108	0.625767
Apobec3	0.12	0.305	6.30239e-108	-0.765383
Sfxn1	0.451	0.206	8.19577e-108	0.558199
Elk3	0.16	0.342	2.08127e-107	-0.72447
Rab11a	0.463	0.581	2.78711e-107	-0.600166
Rps27rt	0.91	0.906	2.89514e-107	-0.584794
Dpm3	0.793	0.539	1.76967e-106	0.552781
Rbm3	0.678	0.764	2.87233e-106	-0.618782
Rac1	0.723	0.793	1.66922e-105	-0.544845
Rps18-ps3	0.384	0.562	2.93911e-105	-0.742509
Fkbp10	0.347	0.125	4.70379e-104	0.500059
Lbp	0.298	0.091	7.98039e-104	0.5188
Slc50a1	0.636	0.363	1.91238e-103	0.517755
Acaa2	0.523	0.273	9.00312e-103	0.621499
Twsg1	0.326	0.119	3.75403e-102	0.515766
Casp8	0.064	0.272	8.24752e-102	-0.603958
Rnf149	0.14	0.331	4.54762e-101	-0.708588
Ccdc12	0.462	0.599	9.32833e-101	-0.597855
Golim4	0.471	0.216	3.40107e-100	0.573208
Gm11808	0.595	0.717	1.90758e-99	-0.657765
Foxp1	0.26	0.435	2.56697e-99	-0.701891
Pura	0.65	0.384	4.14044e-99	0.565523
Pofut2	0.503	0.258	7.94645e-99	0.533026
Atp6v0b	0.618	0.67	3.65918e-98	-0.504188
Ctla2a	0.108	0.254	4.42635e-98	-1.27841
Ehd4	0.137	0.331	7.41669e-98	-0.747195
Syngr2	0.259	0.406	8.80189e-98	-0.590252
Gm9493	0.702	0.733	1.06078e-97	-0.543534
Rgs10	0.417	0.437	1.15892e-97	-0.510452
Irf5	0.079	0.276	5.8622e-97	-0.664445
Ctsk	0.307	0.104	6.51875e-97	0.508565
Gem	0.377	0.147	1.88438e-96	0.670075
Psme1	0.469	0.608	2.13734e-96	-0.61353
Ets1	0.229	0.317	4.87259e-96	-0.700763
Ginm1	0.54	0.288	5.90975e-96	0.52934
Creb3l2	0.405	0.175	2.48583e-95	0.519267
Sulf1	0.367	0.146	2.82464e-95	0.514606
Picalm	0.307	0.482	1.17617e-94	-0.623327
Man2b1	0.117	0.311	7.498e-94	-0.665622
Lsp1	0.608	0.61	1.17968e-93	-0.594729
Gpi1	0.511	0.615	1.93446e-93	-0.540179
Cycs	0.472	0.585	1.22989e-92	-0.568724
Grb2	0.237	0.408	1.99572e-92	-0.57409
Mif	0.628	0.637	3.74281e-92	-0.518387
Cmpk1	0.377	0.531	4.36185e-92	-0.555128
Tln1	0.399	0.566	5.64655e-92	-0.619358
Atp1a1	0.276	0.463	1.36039e-91	-0.645176
Ehd1	0.309	0.441	5.4194e-91	-0.629942
Mafb	0.341	0.399	1.3298e-90	-0.906683
Hpcal1	0.195	0.385	1.7094e-90	-0.585303
Rpl27-ps3	0.473	0.604	2.48164e-90	-0.624531
Pja1	0.362	0.157	3.17164e-90	0.505538
Prelid1	0.536	0.633	4.30405e-90	-0.525175
Ets2	0.08	0.257	3.91699e-89	-0.704971
Cap1	0.125	0.317	7.34352e-89	-0.604655
Tmbim6	0.762	0.815	1.40328e-88	-0.522703
Cnn2	0.343	0.522	1.41332e-88	-0.673883
Bcl7c	0.546	0.302	4.59782e-88	0.528921
Herpud1	0.638	0.387	6.14195e-88	0.549446
Mmp14	0.49	0.252	6.20945e-88	0.537573
Mndal	0.251	0.382	1.48641e-87	-0.681416
Gda	0.17	0.314	5.28023e-87	-0.726709
Wdr1	0.324	0.486	1.81813e-86	-0.569118
Gltp	0.29	0.456	2.02841e-86	-0.588781
Hif1a	0.143	0.315	5.78452e-86	-0.607884
Snx2	0.309	0.422	1.71102e-85	-0.518775
Mef2a	0.231	0.41	1.74254e-85	-0.594185
Sirpa	0.14	0.312	1.15536e-84	-0.636335
Csk	0.185	0.341	1.55701e-84	-0.500763
Wisp2	0.285	0.097	3.80325e-84	0.864735
Kdelr2	0.67	0.432	3.92527e-84	0.576471
Trim30a	0.091	0.276	5.45978e-84	-0.62415
Sypl	0.356	0.464	5.61717e-84	-0.501687
Atp2b1	0.377	0.519	2.6236e-83	-0.598148
Crtc3	0.469	0.245	1.00366e-82	0.501833
Gm10116	0.434	0.495	1.43685e-82	-0.611047
Ptbp3	0.278	0.456	1.7773e-82	-0.567061
Prcp	0.158	0.339	2.90145e-82	-0.608122
Adipor1	0.428	0.55	2.92845e-82	-0.506972
Dazap2	0.395	0.532	6.31264e-79	-0.512775
Spry2	0.263	0.088	9.11784e-78	0.561425
Yipf5	0.516	0.294	1.9739e-77	0.508802
Sec11c	0.288	0.427	2.7173e-77	-0.508961
Slc3a2	0.379	0.488	2.19957e-75	-0.549531
Emilin2	0.118	0.255	4.15483e-75	-0.590687
Thbs1	0.201	0.294	6.89459e-74	-1.09645
Fosb	0.609	0.423	9.4817e-74	0.721977
Stx7	0.301	0.448	1.20041e-73	-0.503012
Sft2d1	0.197	0.354	3.16835e-73	-0.504426
Psmb9	0.16	0.317	1.52948e-72	-0.581721
Kctd12	0.126	0.294	4.86066e-71	-0.575768
Ppp1r18	0.17	0.344	5.20726e-71	-0.516755
Dusp3	0.372	0.454	8.04474e-71	-0.548599
Bst2	0.557	0.59	3.16344e-63	-0.547936
Lmo2	0.129	0.294	1.19536e-62	-0.549991
Irf8	0.22	0.331	4.33846e-62	-0.614515
Ier5	0.477	0.633	4.09385e-58	-0.609082
Ccl2	0.144	0.297	3.72146e-54	-1.49974
Junb	0.921	0.85	4.60454e-49	0.602272
Klf4	0.76	0.572	6.59783e-49	0.509515
Klf6	0.597	0.667	1.3259e-45	-0.51974
Tmem176b	0.194	0.327	2.92766e-45	-0.800181
Klf2	0.809	0.794	7.98038e-44	-0.613711
Apoe	0.93	0.865	5.2933e-40	-0.732849
Fos	0.896	0.828	2.30483e-29	0.503708

## Sheet: F-Act vs rest
Gene	pct.1	pct.2	p_val_adj	Log2FoldChange
Col8a1	0.865	0.219	0	2.2573
Bgn	0.996	0.414	0	2.15802
Mfap5	0.958	0.328	0	2.11842
Gsn	0.986	0.794	0	2.0511
Mgp	0.987	0.603	0	2.02818
Mfap4	0.76	0.16	0	2.02263
Lum	0.971	0.364	0	1.94729
Fstl1	0.975	0.319	0	1.92534
Ccdc80	0.975	0.344	0	1.91084
Rbp1	0.977	0.295	0	1.90647
Serpinf1	0.943	0.286	0	1.85077
Cfh	0.9	0.341	0	1.83774
Pcolce	0.957	0.355	0	1.78544
Dcn	0.995	0.581	0	1.72564
Pam	0.918	0.316	0	1.71887
Meox1	0.786	0.219	0	1.71009
Fbln1	0.837	0.262	0	1.66726
Fbln2	0.929	0.331	0	1.64269
Aspn	0.829	0.219	0	1.6398
Pmp22	0.938	0.362	0	1.59564
Cygb	0.939	0.293	0	1.58367
Nbl1	0.734	0.183	0	1.55768
Fibin	0.759	0.188	0	1.54808
Ptgis	0.865	0.233	0	1.4822
Serping1	0.948	0.334	0	1.46923
Pcolce2	0.847	0.218	0	1.46065
Loxl1	0.937	0.287	0	1.44856
Lhfp	0.958	0.305	0	1.4375
Col1a2	0.981	0.344	0	1.40596
Rcn3	0.919	0.29	0	1.38173
Gpx3	0.957	0.351	0	1.37747
Fxyd1	0.9	0.267	0	1.37111
Dpt	0.954	0.3	0	1.36614
Mmp2	0.864	0.276	0	1.3609
Emp1	0.924	0.453	0	1.35422
Igfbp7	1	0.688	0	1.34382
Entpd2	0.839	0.247	0	1.31231
Col6a1	0.905	0.28	0	1.29819
Col15a1	0.863	0.278	0	1.29341
Col3a1	0.984	0.41	0	1.29154
Sdc2	0.89	0.262	0	1.2823
Smoc2	0.87	0.282	0	1.24728
Mxra8	0.861	0.26	0	1.23989
Col1a1	0.969	0.299	0	1.21503
Adamts2	0.786	0.191	0	1.19276
Htra3	0.915	0.337	0	1.18784
Col6a2	0.871	0.262	0	1.18467
Timp2	0.97	0.475	0	1.16655
Crispld2	0.849	0.256	0	1.15771
Prelp	0.845	0.257	0	1.15344
Gpm6b	0.832	0.242	0	1.12773
Sparc	0.996	0.628	0	1.07943
Rarres2	0.925	0.309	0	1.03594
Tmsb4x	0.999	1	0	-1.74801
Srgn	0.175	0.674	0	-2.83983
Cd52	0.184	0.554	0	-3.21281
Fabp4	0.692	0.686	0	-3.75702
Lyz2	0.609	0.663	0	-4.2624
Sod3	0.8	0.224	7.7439849329157e-320	1.22692
Olfml3	0.838	0.286	7.0083760601531e-314	1.36589
Serpine2	0.83	0.254	7.13452325151482e-313	1.26479
Fcer1g	0.256	0.49	1.19291333084818e-312	-3.33263
Cyba	0.821	0.835	2.38913199580933e-311	-1.51078
Col5a2	0.722	0.189	4.43666675679131e-311	0.884804
Serpinh1	0.984	0.527	6.33971230752235e-308	1.25315
Gas1	0.831	0.262	7.972e-305	1.22024
Fbn1	0.816	0.249	4.77164e-303	1.17829
Medag	0.764	0.207	3.5182e-302	1.13324
Pi16	0.856	0.353	1.60648e-301	1.6342
Snhg18	0.776	0.22	2.12647e-301	0.975342
Igfbp4	0.929	0.408	1.08273e-300	1.30693
Ogn	0.827	0.271	6.28502e-298	1.03825
Pdlim2	0.858	0.313	3.88109e-297	1.2145
Axl	0.866	0.315	1.58798e-296	1.07159
Gng11	0.762	0.504	1.77367e-296	-1.04609
Lgals1	0.998	0.781	3.07276e-295	1.30608
Cd63	0.976	0.519	8.27489e-294	1.09274
S100a6	0.999	0.829	4.8889e-292	0.969779
Cilp	0.485	0.059	6.05264e-292	1.97622
Phlda3	0.807	0.261	1.03697e-288	1.15932
Nfix	0.794	0.251	8.35514e-286	1.10857
Lpar1	0.702	0.172	1.76834e-285	0.967134
Gpx8	0.757	0.214	2.13429e-283	1.00541
Bicc1	0.75	0.214	5.27772e-283	0.926912
Btg1	0.606	0.812	6.08025e-282	-1.90155
Pmepa1	0.74	0.209	1.30615e-281	1.14409
Abca8a	0.769	0.23	3.16969e-280	1.00985
Tyrobp	0.238	0.501	3.28093e-279	-3.16073
Cryab	0.751	0.217	3.27564e-277	1.02986
Islr	0.754	0.217	5.38328e-277	1.18568
H2B-EGFP	0.745	0.211	3.07884e-276	1.07975
Matn2	0.692	0.174	4.51008e-276	1.09739
Oaf	0.8	0.26	7.39179e-275	1.03412
Postn	0.627	0.144	6.16427e-274	1.82224
Selm	0.939	0.438	7.95351e-273	0.9767
Ctss	0.176	0.499	2.02696e-272	-3.31796
Fhl1	0.731	0.204	4.15499e-272	1.05666
Meg3	0.779	0.244	1.86109e-271	1.21598
Dpysl3	0.714	0.194	6.61001e-271	1.02032
Prkcdbp	0.93	0.411	1.99775e-269	0.933536
Fxyd6	0.825	0.291	3.88671e-268	1.13305
Adamtsl2	0.488	0.069	1.23346e-266	1.10804
Csrp2	0.741	0.218	2.79412e-266	1.17933
Cp	0.714	0.199	4.37142e-260	1.08739
Ltbp4	0.92	0.444	5.22803e-260	1.17974
Cotl1	0.351	0.547	6.05604e-259	-1.89643
Adamts5	0.719	0.24	1.63683e-257	0.637824
Coro1a	0.085	0.493	8.51592e-254	-2.41855
Vcan	0.727	0.218	1.43472e-251	1.05966
Nenf	0.921	0.472	4.92403e-251	1.00708
Kdelr3	0.699	0.197	8.83283e-249	0.970982
Fgfr1	0.713	0.21	5.0822e-248	0.841502
Nfia	0.803	0.288	5.85561e-246	1.0338
Timp1	0.603	0.163	8.96097e-246	1.79024
Ndrg2	0.66	0.172	2.85645e-245	0.985514
Tuba1a	0.974	0.677	7.97793e-244	1.02638
Cpq	0.759	0.255	1.79079e-243	1.04507
Nid1	0.836	0.333	1.14146e-241	0.784262
Ctgf	0.473	0.071	5.85745e-241	1.14838
Cd34	0.942	0.477	6.60496e-241	0.972657
Aebp1	0.698	0.206	2.05859e-240	0.896864
Zbtb20	0.947	0.504	2.57445e-240	1.01905
Clec3b	0.759	0.273	1.13755e-239	0.781309
Ace	0.736	0.233	1.13761e-239	0.998057
Ckb	0.869	0.469	1.25072e-239	1.24648
Txndc5	0.84	0.358	2.94362e-239	1.00718
Fkbp7	0.753	0.248	3.7536e-239	0.876068
Rnase4	0.917	0.444	1.15956e-238	0.852959
Nedd4	0.863	0.358	1.32775e-238	0.796229
Lamc1	0.822	0.316	1.39688e-238	0.864478
Pdgfrl	0.534	0.101	1.55781e-238	0.942994
Dap	0.867	0.421	1.5133e-237	1.03095
Itgbl1	0.573	0.123	4.68311e-236	1.03161
Mmp23	0.669	0.187	3.90771e-235	0.891954
Ctsb	0.915	0.803	8.51617e-235	-1.39324
Laptm5	0.081	0.458	3.89791e-234	-1.98658
Sulf1	0.59	0.135	8.62917e-234	0.889985
H2-D1	0.941	0.976	8.98185e-234	-1.17196
Cald1	0.899	0.407	3.73639e-233	0.857747
Camk2n1	0.731	0.235	1.94928e-232	1.03157
Lama2	0.676	0.196	1.65556e-230	0.864304
Cd53	0.063	0.466	2.14348e-229	-1.97178
Ftl1	0.999	0.993	2.60721e-229	-1.02314
Mtch1	0.917	0.53	2.7384e-228	1.03335
F2r	0.651	0.184	4.4001e-228	1.03109
Mxra7	0.748	0.254	4.19699e-227	0.886497
Lgmn	0.36	0.466	1.34407e-225	-2.08606
Cstb	0.735	0.612	1.77925e-225	-1.11757
Fkbp9	0.751	0.259	2.56291e-225	0.846608
Ddah2	0.856	0.366	1.4781e-223	0.927063
Maged2	0.633	0.173	2.79809e-222	1.01296
Vim	0.998	0.895	7.66248e-222	0.859601
Rhoj	0.811	0.324	2.07936e-221	0.772584
Ptpn18	0.082	0.47	6.10301e-221	-1.67865
Ctsd	0.852	0.732	1.09717e-220	-1.25984
Tnxb	0.665	0.204	1.52468e-220	0.823399
Srpx2	0.627	0.169	3.11222e-220	0.881215
Col14a1	0.589	0.145	4.60737e-220	0.881897
Ahnak2	0.654	0.187	1.61946e-219	0.944105
Arhgdib	0.463	0.608	2.65617e-219	-1.37738
Sfrp1	0.621	0.168	1.19653e-218	0.963349
Cd74	0.292	0.467	2.00644e-218	-4.50908
Serpinb6a	0.896	0.431	4.50348e-217	0.906132
Hmgn1	0.903	0.467	1.03416e-216	0.944588
Gstm5	0.599	0.16	1.78356e-216	0.998877
Il11ra1	0.758	0.274	2.94302e-216	0.948997
Loxl2	0.573	0.142	2.43397e-215	1.04281
Npdc1	0.78	0.295	1.118e-214	0.860376
Cd9	0.92	0.593	2.14114e-214	1.12039
H2-Ab1	0.307	0.436	3.65807e-214	-3.22453
Lgals3	0.151	0.419	1.08857e-212	-2.93178
Ms4a4d	0.621	0.191	2.28596e-212	0.668244
Chpf	0.585	0.15	1.64648e-209	0.867332
Aldh1a1	0.631	0.186	2.12269e-209	0.806564
Tbx20	0.565	0.138	2.25871e-209	0.947151
Emilin1	0.738	0.27	1.38402e-208	0.967091
Sh3bgrl3	0.87	0.873	3.23213e-207	-1.15286
Col5a1	0.601	0.17	1.40275e-206	0.734545
P3h3	0.64	0.189	1.81736e-206	0.792173
Ly6e	0.889	0.907	8.86674e-205	-1.29567
H2-Aa	0.276	0.38	1.72559e-202	-3.2996
Tspan3	0.779	0.314	7.28919e-202	0.855952
Dbn1	0.569	0.144	1.68534e-201	0.820088
Crip2	0.948	0.523	2.03408e-201	0.671967
Lmna	0.882	0.457	7.22303e-201	0.955165
Socs2	0.763	0.297	1.11846e-198	0.797619
Dpep1	0.686	0.247	3.17993e-198	0.729422
Fbln5	0.65	0.232	2.38053e-197	0.551772
Ak1	0.458	0.087	1.60589e-196	0.778555
Copz2	0.719	0.259	3.92416e-196	0.77723
Efemp2	0.626	0.187	9.1784e-196	0.76811
Ly6c1	0.451	0.447	4.35993e-195	-2.07356
Dclk1	0.507	0.113	1.74294e-194	0.787854
Qpct	0.582	0.158	2.13725e-194	0.857118
Alox5ap	0.074	0.397	2.14718e-193	-2.19916
Lrp1	0.895	0.47	2.53032e-193	0.897739
Slc43a3	0.788	0.335	3.438e-193	0.672899
Psmb8	0.353	0.63	5.49205e-193	-1.26523
P3h4	0.546	0.14	1.07991e-192	0.67271
Nfic	0.836	0.409	1.24697e-192	0.919342
Psap	0.919	0.886	5.16102e-192	-1.18996
Sox9	0.503	0.113	6.8237e-192	0.930541
Tmem45a	0.53	0.129	9.19263e-192	0.818782
Ctsc	0.099	0.424	1.10849e-191	-2.52325
Creb3l2	0.59	0.169	3.32751e-191	0.852709
Tgfb3	0.499	0.114	9.30693e-191	0.716184
Nupr1	0.824	0.382	1.17206e-189	1.03282
Plxdc2	0.656	0.218	2.75195e-189	0.750615
Scn7a	0.554	0.151	5.16735e-189	0.673935
Atf5	0.676	0.231	1.87103e-188	0.930533
Rac2	0.065	0.431	4.86388e-188	-1.71403
Ugp2	0.796	0.383	7.09598e-188	0.993956
Calu	0.804	0.353	9.78908e-188	0.840149
Lcp1	0.055	0.421	8.29432e-187	-1.65349
Rcn1	0.683	0.238	1.15997e-186	0.803284
Gpc6	0.571	0.164	1.62868e-186	0.674621
Gm9780	0.524	0.132	5.00993e-186	0.664031
Gngt2	0.116	0.481	1.90855e-184	-1.59936
Slc9a3r2	0.413	0.333	2.28024e-184	-0.953327
Pcsk6	0.618	0.218	2.31594e-184	0.579386
Anxa1	0.91	0.508	3.36126e-184	0.854921
Igf1	0.658	0.222	6.14684e-184	0.982125
C1qtnf7	0.556	0.153	6.30164e-184	0.707615
Vkorc1	0.799	0.349	6.88143e-184	0.796416
Wfdc17	0.12	0.405	1.31028e-183	-2.75578
Col6a3	0.601	0.182	6.44317e-183	0.83475
Gpx7	0.623	0.203	8.34765e-182	0.860893
Ucp2	0.098	0.451	4.6435e-181	-1.45363
Pdgfra	0.549	0.153	4.97814e-181	0.684136
Angptl2	0.616	0.208	4.50753e-180	0.639175
Arhgef40	0.554	0.152	3.02305e-179	0.740979
Cst6	0.317	0.045	1.77418e-176	1.11841
Abi3bp	0.536	0.145	2.89029e-176	0.74603
Fam49b	0.151	0.439	4.04119e-176	-1.39842
Grn	0.688	0.619	2.85043e-175	-0.796398
Tcf21	0.533	0.142	3.49703e-175	0.772406
Ctsh	0.267	0.46	4.295e-175	-1.44625
Plpp1	0.734	0.321	5.35309e-175	0.520942
Gstm1	0.894	0.494	1.0011e-174	0.803361
Maged1	0.614	0.198	1.85764e-174	0.769026
Sparcl1	0.896	0.494	2.0436e-174	0.508882
Fau	0.998	0.994	3.2637e-174	-0.72843
Gpr153	0.495	0.119	3.33728e-174	0.715227
Frzb	0.484	0.114	9.23681e-174	0.760207
Actr3	0.64	0.712	2.1388e-173	-0.990877
H2-K1	0.808	0.875	4.02254e-173	-1.10139
Ostf1	0.656	0.733	5.42158e-172	-0.87091
B2m	0.985	0.993	6.95927e-172	-0.898114
Arf4	0.928	0.605	2.17891e-170	0.822286
H2-Eb1	0.217	0.329	2.39892e-170	-3.02191
Slc25a4	0.949	0.621	5.79761e-170	0.725087
Tmed3	0.884	0.491	8.87487e-170	0.792676
Igfbp6	0.726	0.316	1.02151e-169	1.25082
Kcnk2	0.409	0.078	2.56289e-169	0.864321
Sdcbp	0.748	0.69	9.01359e-169	-0.800183
Dkk3	0.344	0.053	6.96898e-168	0.709599
Fabp5	0.342	0.496	1.6475e-167	-1.97696
Arpc3	0.831	0.849	1.78375e-167	-0.780671
Pfn1	0.939	0.943	6.66446e-167	-1.04913
Ifi30	0.235	0.406	7.70901e-167	-1.39621
Rora	0.599	0.196	8.12973e-167	0.684725
Naalad2	0.486	0.122	2.39963e-166	0.63433
Ms4a6c	0.04	0.356	6.73433e-166	-1.99467
Mgll	0.279	0.298	2.26176e-165	-1.52619
Unc93b1	0.241	0.426	2.51795e-165	-1.1322
Spi1	0.036	0.369	5.49695e-165	-1.56974
Ptms	0.932	0.581	6.54489e-165	0.778834
Gfpt2	0.476	0.122	1.41445e-164	0.686678
Ptprc	0.028	0.365	2.84279e-164	-1.35776
Cxcl12	0.434	0.34	3.43816e-164	-1.42041
Cd302	0.843	0.431	6.23546e-163	0.783662
Eln	0.64	0.23	5.17125e-161	0.939366
Clta	0.856	0.801	5.36237e-161	-0.653242
Fkbp10	0.484	0.123	6.68895e-161	0.702987
Tspan13	0.083	0.406	9.04111e-161	-1.96636
Sgce	0.611	0.211	9.68183e-161	0.660841
Itih5	0.492	0.127	1.53178e-160	0.799993
Prnp	0.637	0.244	2.15587e-160	0.539241
Arpc5	0.744	0.735	4.82206e-160	-0.735671
1500009L16Rik	0.399	0.078	7.73677e-160	0.659982
Dstn	0.939	0.642	9.92466e-160	0.816725
Ikbip	0.57	0.179	1.18864e-159	0.666997
Cd68	0.052	0.35	2.56526e-159	-1.74304
Slfn2	0.084	0.421	1.10107e-158	-1.4528
C1qb	0.189	0.317	1.27348e-158	-2.86664
Cav1	0.226	0.32	3.11107e-158	-1.77874
Golim4	0.616	0.214	1.84716e-157	0.706008
Colec12	0.487	0.133	1.96946e-157	0.585192
Ndn	0.525	0.152	6.13531e-157	0.68235
Col4a4	0.423	0.092	1.08233e-156	0.663512
Fcgr3	0.054	0.349	1.8274e-156	-1.78604
Gm2a	0.484	0.508	4.49942e-156	-0.986079
Rab34	0.547	0.169	1.84428e-155	0.642417
Gxylt2	0.464	0.119	2.16386e-155	0.655332
Nnmt	0.559	0.175	3.73681e-155	0.717919
Mrc2	0.456	0.111	2.07603e-154	0.64075
Plekha6	0.407	0.085	2.24293e-154	0.618133
Rbms3	0.518	0.151	1.02529e-153	0.666316
Spry1	0.575	0.191	5.55694e-153	0.703581
Sdpr	0.245	0.322	1.6769e-152	-1.842
Prrx1	0.48	0.13	3.77046e-152	0.601227
Ddr2	0.478	0.131	4.64003e-152	0.591646
Ptgfrn	0.497	0.138	4.65986e-152	0.638139
Capza2	0.711	0.701	2.87761e-151	-0.703787
Gpx1	0.857	0.794	8.37135e-151	-0.871112
Ccl6	0.117	0.369	1.29683e-150	-2.96139
Tpd52	0.086	0.382	1.89998e-150	-1.36082
Hcls1	0.022	0.332	2.47329e-150	-1.06607
Anxa5	0.975	0.807	1.95524e-149	0.749558
Cd36	0.153	0.387	7.14074e-149	-2.35973
Efhd2	0.322	0.434	1.23506e-148	-0.986235
Ppic	0.719	0.318	1.56867e-148	0.632904
Crip1	0.995	0.94	2.11201e-148	0.866381
Ghr	0.52	0.158	2.14428e-148	0.627019
Tgfbi	0.508	0.447	3.8291e-148	-1.18555
Gmfg	0.04	0.353	1.5807e-147	-1.28246
Gpihbp1	0.167	0.321	2.75062e-147	-2.17939
Fyb	0.05	0.347	3.48267e-147	-1.33942
Plin2	0.32	0.454	5.72982e-147	-1.17399
Taldo1	0.601	0.634	2.81293e-146	-0.805622
Fth1	1	0.992	3.02595e-145	-0.765514
Scd1	0.464	0.127	3.83379e-145	0.611866
Lbp	0.401	0.09	1.81951e-144	0.757917
Lst1	0.09	0.365	8.3063e-144	-1.71976
Lyn	0.086	0.385	2.05714e-143	-1.11274
Prdx5	0.77	0.645	2.36889e-143	-0.566892
Arpc2	0.865	0.879	3.05867e-143	-0.837457
Rgs2	0.057	0.373	4.29059e-143	-1.55302
Cyb5a	0.948	0.638	3.27817e-142	0.557819
Msrb1	0.423	0.443	6.85122e-142	-0.957976
Tril	0.417	0.104	8.81828e-142	0.539346
Cbx5	0.576	0.201	1.00374e-141	0.640433
Pitpna	0.446	0.517	1.47248e-141	-0.801839
Plat	0.605	0.241	1.76253e-141	0.532072
Tusc3	0.639	0.257	9.51052e-141	0.572014
Sub1	0.731	0.785	6.23616e-140	-0.867044
Lilrb4a	0.033	0.32	7.99439e-140	-1.57009
Cd48	0.021	0.306	1.4697e-139	-1.09918
Ecm2	0.568	0.202	1.79134e-139	0.63707
Tmem119	0.491	0.145	2.19418e-139	0.638224
Lmo4	0.717	0.328	4.87595e-139	0.794551
Fxyd5	0.738	0.705	4.26434e-138	-0.891849
Ly86	0.016	0.299	1.21676e-137	-1.32494
H3f3a	0.972	0.968	2.63749e-137	-0.721618
Scml4	0.317	0.054	1.38198e-136	0.512663
Tm6sf1	0.023	0.319	1.54506e-136	-1.01176
Mical2	0.353	0.069	1.57594e-136	0.581509
Uap1	0.67	0.285	6.07294e-136	0.778263
Arl1	0.844	0.486	6.21625e-136	0.715675
Cd93	0.046	0.34	9.43853e-136	-1.29987
Bok	0.453	0.128	1.54615e-135	0.602567
Tppp3	0.698	0.318	9.41009e-135	1.02475
Itgb2	0.027	0.314	1.17459e-134	-1.17746
Vwa1	0.686	0.313	1.43095e-134	0.540522
Gstt1	0.505	0.171	2.70332e-134	0.527674
Ntn1	0.374	0.082	3.86345e-134	0.554665
Tceal8	0.681	0.296	1.31363e-133	0.620052
Ccr2	0.031	0.305	2.06935e-133	-1.80525
Aprt	0.449	0.512	3.51941e-133	-0.825947
C1qc	0.133	0.269	5.13429e-132	-2.45609
Pde1a	0.449	0.127	7.96005e-132	0.565254
Nrp1	0.624	0.544	8.57875e-132	-0.808656
Ccl9	0.106	0.342	8.90905e-132	-2.36405
Lamb2	0.492	0.159	9.74304e-131	0.549788
Itgb5	0.746	0.361	1.10147e-130	0.663341
Dag1	0.563	0.211	1.32876e-130	0.529688
Ms4a6d	0.041	0.307	1.54107e-130	-1.61221
Map1lc3a	0.761	0.379	1.69124e-130	0.61619
Ecm1	0.804	0.433	2.19861e-130	0.821426
Spon2	0.488	0.151	2.65957e-130	0.850949
C5ar1	0.032	0.298	3.44865e-130	-1.73801
Selenbp1	0.585	0.222	1.83495e-129	0.704499
Cdc42ep5	0.472	0.147	2.61078e-129	0.526505
Bmp1	0.464	0.14	4.43456e-129	0.535632
Csf1r	0.039	0.304	1.04641e-128	-1.28665
Mpeg1	0.029	0.301	2.9841e-128	-1.25677
Scn1b	0.455	0.131	3.66212e-128	0.605536
Ier5	0.44	0.629	6.49897e-128	-1.03987
Amotl1	0.553	0.212	6.6684e-128	0.507298
Ackr4	0.314	0.056	3.22715e-127	0.578553
Cd248	0.386	0.106	5.81889e-127	0.523667
Clmp	0.499	0.166	5.97992e-127	0.558614
C1qtnf2	0.498	0.175	6.745e-127	0.500407
Ptpn6	0.032	0.307	8.62914e-127	-1.05441
Cd14	0.049	0.311	9.5613e-127	-1.8581
Rap1b	0.73	0.725	4.08011e-126	-0.667043
Rab23	0.396	0.098	5.84176e-126	0.601579
B3gnt9	0.423	0.117	8.97466e-126	0.508291
Akap12	0.588	0.237	9.17195e-126	0.555128
Dab2	0.234	0.365	1.01619e-125	-1.09652
Ms4a6b	0.044	0.323	1.05978e-125	-1.34462
AF251705	0.022	0.293	2.40102e-125	-1.24607
Arpc4	0.572	0.607	2.58422e-125	-0.670426
Tpm1	0.73	0.357	3.13663e-125	0.524299
Vamp8	0.527	0.592	3.41131e-125	-0.677341
Jade1	0.479	0.153	1.05547e-124	0.578748
Apod	0.336	0.068	1.75847e-124	0.840058
Pkd2	0.496	0.164	1.86742e-124	0.579126
C1qa	0.147	0.281	7.61278e-124	-2.75317
Nav1	0.66	0.289	8.04731e-124	0.646911
Bmp4	0.405	0.113	5.02786e-123	0.537647
Vcam1	0.51	0.18	7.68789e-123	0.606532
Cyr61	0.584	0.227	8.19518e-123	1.04355
Hmgn3	0.51	0.172	1.01397e-122	0.617031
Pla1a	0.482	0.166	1.02184e-122	0.594593
Gimap6	0.068	0.313	2.86041e-122	-1.42336
Egfl7	0.099	0.282	2.88594e-122	-1.77949
Gnai2	0.876	0.874	3.47956e-122	-0.649925
Ctsa	0.411	0.477	6.99323e-122	-0.753455
Olfml2b	0.344	0.074	8.56275e-122	0.593854
Mfap2	0.403	0.112	8.99223e-122	0.556342
Tnfrsf12a	0.455	0.138	1.24895e-121	0.736647
Fcgr2b	0.031	0.302	2.8167e-121	-1.24798
Fndc3b	0.58	0.234	2.86881e-121	0.504075
Ctsz	0.82	0.716	2.87707e-120	-0.506166
H2-DMa	0.045	0.305	1.24467e-119	-1.37547
Atox1	0.875	0.822	3.52763e-119	-0.589452
Selplg	0.033	0.294	1.15935e-118	-1.05768
Wbp5	0.823	0.464	1.27116e-118	0.606219
Aif1	0.035	0.288	3.3017e-118	-1.4492
Heyl	0.434	0.133	1.7853e-117	0.586401
Cybb	0.025	0.287	1.14923e-116	-1.21406
AW112010	0.29	0.433	1.52166e-116	-1.388
Dpysl2	0.794	0.449	2.31234e-116	0.717185
Rasl11b	0.329	0.071	3.50755e-116	0.519993
Serpine1	0.408	0.119	4.02995e-116	1.2149
Cyth3	0.597	0.252	4.73648e-116	0.537587
Ncf2	0.024	0.283	4.80477e-116	-0.966579
Gas6	0.747	0.385	9.24493e-116	0.692413
Ltbp3	0.412	0.116	1.72621e-115	0.533344
Mef2c	0.368	0.46	1.99581e-115	-0.904164
Pld4	0.033	0.295	5.43013e-115	-1.14845
AI662270	0.014	0.266	1.46566e-114	-0.88618
Ctsl	0.958	0.728	2.08818e-114	0.546069
Shisa5	0.765	0.779	4.06035e-114	-0.741952
Morf4l2	0.835	0.503	4.89279e-114	0.65804
Kazald1	0.401	0.114	6.26722e-114	0.524389
Stk17b	0.092	0.345	6.86162e-114	-1.09157
Ctsk	0.391	0.106	7.15342e-114	0.555524
Aldh1a2	0.29	0.067	6.39626e-113	0.802255
Pdpn	0.487	0.171	6.67965e-113	0.558299
Ptov1	0.663	0.308	1.64897e-112	0.541711
Rgs10	0.426	0.435	4.02102e-112	-0.663858
Arl3	0.593	0.252	4.9234e-112	0.517683
Ebf2	0.407	0.119	6.7794e-112	0.518037
Icam2	0.08	0.287	1.62191e-111	-1.47083
Rnf11	0.665	0.311	1.70818e-111	0.597817
Plek	0.035	0.288	2.6436e-111	-1.0912
Zfyve21	0.524	0.198	2.88575e-111	0.524633
Clic1	0.887	0.851	4.77485e-111	-0.563871
Capzb	0.796	0.76	1.54534e-110	-0.528822
Pycard	0.182	0.391	1.61063e-110	-0.958128
Esam	0.079	0.272	5.45326e-110	-1.60755
Clec4a3	0.02	0.257	6.55183e-110	-1.08105
Rhoq	0.48	0.165	1.61253e-109	0.557901
Itm2a	0.487	0.181	2.53849e-109	0.529479
Fam114a1	0.459	0.153	3.53702e-109	0.522633
Clec4a2	0.02	0.262	4.33833e-109	-1.09709
Lims2	0.307	0.289	4.95688e-109	-0.742949
Rgcc	0.091	0.314	7.99052e-109	-1.58318
Ifi27l2a	0.944	0.707	8.61057e-109	0.878729
Srpx	0.341	0.081	1.01732e-108	0.617627
Nrros	0.022	0.272	1.73574e-108	-0.876051
Psme1	0.481	0.6	9.54645e-108	-0.761218
Actr2	0.476	0.542	1.14147e-107	-0.684512
Rps27	1	0.999	2.60611e-107	-0.515651
H3f3b	0.98	0.987	3.60855e-107	-0.668853
Tbrg1	0.736	0.389	1.14378e-106	0.502686
Slc29a1	0.666	0.319	2.1123e-106	0.603181
Slc6a6	0.171	0.412	2.71129e-106	-1.17982
Snx5	0.38	0.447	3.85737e-106	-0.678242
Svep1	0.348	0.087	4.93695e-106	0.543338
Fcgr1	0.02	0.252	9.27607e-106	-1.11107
Skap2	0.073	0.325	1.03527e-105	-0.913848
Swi5	0.92	0.641	2.63609e-105	0.55426
Antxr1	0.378	0.104	2.88371e-105	0.514369
Calm1	0.956	0.96	4.36491e-105	-0.75964
Rps29	1	0.999	6.79855e-105	-0.538565
Gm9843	0.878	0.851	8.37524e-105	-0.706043
Emb	0.024	0.258	2.40387e-104	-1.00099
9530068E07Rik	0.708	0.362	2.77944e-104	0.522767
Tnfaip8	0.141	0.368	4.56556e-104	-0.877641
Prg4	0.262	0.052	1.97723e-103	1.19725
Aqp1	0.141	0.256	2.14705e-103	-1.99668
Cdh5	0.077	0.254	2.5586e-103	-1.46692
Serpina3n	0.287	0.06	5.28446e-103	0.658193
Il1b	0.118	0.3	8.86929e-103	-2.3197
Atp6v0b	0.646	0.665	1.42571e-102	-0.578418
AB124611	0.024	0.262	1.55399e-102	-0.848423
Metrnl	0.283	0.376	2.31942e-102	-0.827831
Bcl7c	0.642	0.304	4.30906e-102	0.540955
Fhl2	0.3	0.065	1.7122e-101	0.613211
Myoc	0.29	0.063	1.96884e-101	1.00794
S100a4	0.405	0.414	3.62965e-101	-1.11896
Pim1	0.209	0.405	4.2087e-101	-1.17196
Hnrnpf	0.791	0.834	4.61762e-101	-0.644008
Cyth4	0.024	0.262	1.06921e-100	-0.831646
Sulf2	0.468	0.177	1.95404e-100	0.694314
Ncf4	0.024	0.259	2.22455e-100	-0.852325
Mafb	0.374	0.394	3.55801e-100	-1.00104
Kctd11	0.322	0.078	1.07271e-99	0.501331
Samhd1	0.189	0.381	2.99371e-99	-0.887388
Gem	0.436	0.152	5.47348e-99	0.544533
Pkd1	0.419	0.136	7.26307e-99	0.517205
Vasp	0.462	0.506	8.39393e-99	-0.616464
Plac8	0.099	0.288	1.11852e-98	-2.23723
Vat1	0.612	0.282	2.12989e-98	0.538872
Cd200	0.248	0.288	2.19083e-98	-1.01374
Ehd1	0.418	0.426	2.84284e-98	-0.549047
Aes	0.825	0.505	3.34223e-98	0.573346
Plekho1	0.028	0.268	4.43748e-98	-0.753092
Scd2	0.449	0.158	5.33808e-98	0.515466
Cnpy2	0.758	0.423	2.44361e-97	0.509347
Maff	0.408	0.13	2.67572e-97	0.558893
Bhlhe41	0.263	0.055	4.06372e-97	0.568547
Cfp	0.041	0.259	4.96127e-97	-1.1983
Sfr1	0.835	0.528	4.97231e-97	0.578453
Fam105a	0.04	0.281	1.05686e-96	-0.917556
Pf4	0.177	0.293	1.17865e-96	-2.42291
Eno1	0.597	0.635	1.44435e-96	-0.786056
Arhgap31	0.245	0.34	4.38352e-96	-0.906835
Tpm2	0.382	0.115	4.74124e-96	0.680203
Pkm	0.857	0.774	6.65595e-96	-0.595167
Limd2	0.127	0.328	1.30646e-95	-1.08767
Ets1	0.247	0.312	3.01508e-95	-0.774607
Hmox1	0.214	0.32	2.12983e-94	-1.92977
Pecam1	0.121	0.275	2.82273e-94	-1.23846
Dnajc25	0.448	0.16	3.97801e-94	0.513758
Ptp4a3	0.288	0.352	1.19721e-93	-0.775452
Cxcl2	0.129	0.284	1.58248e-93	-2.57973
Ninj1	0.32	0.366	3.29147e-93	-0.711396
Evi2a	0.03	0.258	8.25169e-93	-0.799262
Snx2	0.377	0.41	1.30768e-92	-0.540675
Mcl1	0.497	0.553	4.38107e-92	-0.665752
Id1	0.343	0.302	2.91411e-91	-0.893054
Fn1	0.421	0.414	3.12517e-91	-1.177
Cfl1	0.96	0.951	7.75594e-91	-0.620853
Apobec3	0.15	0.294	1.91549e-90	-0.771065
Timp3	0.693	0.39	2.0102e-90	0.775427
Cst3	0.994	0.951	8.74778e-90	0.707698
Rps27rt	0.947	0.903	9.96563e-90	-0.563346
Pebp1	0.886	0.624	1.00455e-89	0.544216
Lman1	0.632	0.314	2.75305e-89	0.51468
Ptpn1	0.331	0.427	3.15855e-89	-0.712998
Il10rb	0.285	0.437	3.40149e-89	-0.731016
Gltp	0.397	0.439	2.0918e-88	-0.50698
Cxcl16	0.382	0.352	3.52333e-88	-0.542338
6030408B16Rik	0.346	0.106	4.39039e-88	0.507049
Picalm	0.414	0.465	7.28171e-88	-0.567005
Fam96a	0.362	0.425	9.59264e-88	-0.591953
Gm10116	0.547	0.482	1.95439e-87	-0.502824
Hspa8	0.977	0.975	1.29923e-86	-0.696681
Klf6	0.618	0.662	1.71369e-86	-0.768067
Arl6ip1	0.635	0.648	3.35323e-86	-0.529377
Kdelr2	0.736	0.437	5.94199e-86	0.615554
Actb	0.998	0.998	8.86818e-86	-1.13124
Arl4c	0.071	0.279	3.34587e-85	-0.772918
Ostc	0.849	0.566	6.81738e-85	0.533934
Dazap2	0.453	0.521	1.04664e-84	-0.543378
Ccdc12	0.554	0.584	1.4406e-84	-0.517705
Ctnnbip1	0.252	0.306	1.47924e-84	-0.651762
BC028528	0.104	0.316	7.2101e-84	-0.863519
Card19	0.335	0.397	9.51515e-84	-0.59643
Tln1	0.527	0.547	4.50694e-83	-0.501209
Nfkbia	0.59	0.663	2.3401e-82	-0.907246
Tgm2	0.362	0.356	3.11745e-82	-0.533808
Bhlhe40	0.483	0.202	9.22051e-82	0.526687
Ckap4	0.576	0.277	3.65633e-81	0.547347
Vsir	0.184	0.347	8.21529e-81	-0.760383
Sept4	0.25	0.261	1.19717e-80	-0.723295
P4hb	0.787	0.488	2.39483e-80	0.508229
Ehd4	0.144	0.322	3.49104e-80	-0.794468
Cav2	0.118	0.257	5.1952e-80	-1.04867
Psmb9	0.109	0.314	2.223e-79	-0.759184
Cyb5r3	0.698	0.397	2.77029e-78	0.502048
Mt2	0.42	0.16	3.49106e-78	0.881488
Itpkb	0.151	0.302	5.16781e-78	-0.843961
Sgk1	0.294	0.355	1.68886e-77	-0.818761
S100a8	0.317	0.35	1.07389e-76	-2.64991
Gsr	0.168	0.279	2.47506e-76	-0.805143
Ugdh	0.468	0.198	3.22787e-76	0.501182
Dusp3	0.427	0.445	4.98348e-76	-0.585912
Sirpa	0.202	0.299	3.23145e-75	-0.587045
Tmem100	0.275	0.074	4.90258e-75	0.57409
Egr1	0.793	0.519	3.2091e-74	0.712163
Rnf130	0.293	0.402	5.17466e-74	-0.58841
Zfp36l2	0.415	0.506	3.55729e-73	-0.677492
Fli1	0.13	0.315	3.83012e-73	-0.759121
Wisp2	0.324	0.102	1.03833e-72	0.932661
Adam15	0.346	0.386	1.73423e-72	-0.569119
Cd44	0.167	0.3	4.44768e-72	-0.803994
Abracl	0.478	0.528	5.56825e-72	-0.510168
Irf5	0.08	0.267	1.12827e-71	-0.691854
Pid1	0.495	0.455	7.79991e-71	-0.501737
Man2b1	0.157	0.299	3.17663e-70	-0.631676
Il33	0.259	0.068	1.28504e-69	0.504305
Ptp4a1	0.675	0.403	4.76913e-69	0.561888
Ptbp3	0.329	0.443	9.0032e-69	-0.568602
Sft2d1	0.222	0.345	1.39551e-68	-0.546831
Prcp	0.202	0.327	6.04555e-68	-0.61095
S100a9	0.266	0.257	1.93491e-67	-2.2235
Mndal	0.252	0.376	4.57845e-67	-0.753816
Elk3	0.257	0.325	1.00016e-66	-0.575491
Slc3a2	0.44	0.478	3.90463e-66	-0.525507
Slc25a5	0.744	0.75	8.26713e-66	-0.523986
Syngr2	0.298	0.395	9.71523e-66	-0.580312
Crlf2	0.234	0.351	1.92978e-65	-0.559899
Irf8	0.221	0.326	7.63343e-65	-0.716426
Lrrfip1	0.212	0.341	1.05469e-64	-0.618335
Rnf149	0.235	0.314	1.41024e-63	-0.569759
Rnpep	0.228	0.335	1.01699e-61	-0.522959
Spp1	0.176	0.318	7.87655e-61	-2.59667
Sp100	0.25	0.369	3.45059e-59	-0.609497
Gda	0.217	0.304	3.75811e-58	-0.662025
Bst2	0.592	0.585	9.18076e-58	-0.585549
AI607873	0.108	0.265	1.93448e-57	-0.658687
Kctd12	0.12	0.287	2.7993e-57	-0.642428
Dusp1	0.739	0.755	8.25283e-56	-0.774704
Marcksl1	0.159	0.289	3.40357e-55	-0.819748
Apoe	0.927	0.868	7.40545e-55	-1.26769
Sdf2l1	0.347	0.369	3.01236e-53	-0.50378
Slfn5	0.222	0.271	2.7807e-52	-0.506106
Pltp	0.221	0.289	1.9755e-51	-0.592172
Ifi203	0.345	0.405	1.10502e-47	-0.577648
Zfp36	0.524	0.591	1.93858e-47	-0.64711
Ier3	0.448	0.436	1.57456e-46	-0.690814
Ifi204	0.179	0.265	1.81838e-44	-0.575915
Trim30a	0.126	0.265	2.56351e-44	-0.563444
Tuba1c	0.145	0.265	2.36972e-40	-0.543173
Thbs1	0.316	0.279	1.68642e-38	-0.648606
Hspa1a	0.4	0.374	1.89382e-37	-0.813409
Hmgb2	0.276	0.398	1.73325e-36	-0.706308
Cited2	0.198	0.307	1.24401e-35	-0.559086
Tmem176b	0.277	0.313	2.95893e-34	-0.657952
Fgl2	0.31	0.164	2.32828e-33	0.568049
Btg2	0.685	0.735	5.63368e-31	-0.533136
Rtp4	0.199	0.274	1.85355e-29	-0.51442
Atf3	0.26	0.344	1.61994e-26	-0.711224
Ccl2	0.188	0.287	1.0196e-16	-0.961101

## Sheet: F-SH vs rest
Gene	pct.1	pct.2	p_val_adj	Log2FoldChange
Pi16	0.966	0.356	0	2.93974
Clec3b	0.967	0.268	0	2.33576
Mfap5	0.978	0.339	0	2.20299
Igfbp6	0.897	0.312	0	2.13
Cd248	0.781	0.085	0	2.04317
Pcolce2	0.93	0.225	0	2.00386
Axl	0.953	0.321	0	2.00225
Dpt	0.965	0.313	0	1.96044
Tmem100	0.637	0.054	0	1.90094
Pcsk6	0.904	0.206	0	1.90075
Gfpt2	0.783	0.108	0	1.89946
Adamts5	0.923	0.236	0	1.85736
Timp2	0.973	0.485	0	1.78331
Nbl1	0.841	0.187	0	1.78059
Fbln2	0.96	0.341	0	1.77982
Efhd1	0.697	0.045	0	1.75049
Meg3	0.889	0.247	0	1.7221
Fbn1	0.879	0.256	0	1.72159
Gsn	0.995	0.797	0	1.72032
Camk2n1	0.904	0.233	0	1.70085
Scara5	0.781	0.102	0	1.68573
Fstl1	0.966	0.333	0	1.67203
Gstm1	0.974	0.497	0	1.65524
Igfbp4	0.973	0.416	0	1.6424
Tnxb	0.882	0.198	0	1.59863
Cd34	0.979	0.484	0	1.59713
Serping1	0.963	0.345	0	1.57221
Islr	0.852	0.221	0	1.56569
Htra3	0.979	0.344	0	1.52157
Pmp22	0.967	0.372	0	1.49336
Ackr3	0.708	0.105	0	1.45698
Oaf	0.91	0.263	0	1.44512
Lamc1	0.93	0.319	0	1.44181
Medag	0.858	0.212	0	1.41132
Entpd2	0.919	0.253	0	1.41033
Ahnak2	0.813	0.185	0	1.40762
Lrrn4cl	0.604	0.046	0	1.40355
Gpx3	0.977	0.362	0	1.38841
Fxyd1	0.927	0.278	0	1.37317
Rarres2	0.958	0.319	0	1.34307
Dcn	0.994	0.589	0	1.30172
Loxl1	0.941	0.3	0	1.23984
Adgrd1	0.511	0.032	0	1.0611
Cygb	0.934	0.306	0	0.970558
Bgn	0.981	0.427	0	0.93438
Lhfp	0.936	0.32	0	0.816967
Col1a2	0.971	0.357	0	0.692364
Fabp4	0.823	0.677	0	-3.47405
Lyz2	0.54	0.667	0	-4.74655
Smoc2	0.915	0.29	7.7439849329157e-320	1.02733
Cd55	0.795	0.183	9.40894169349257e-317	1.48438
Col3a1	0.967	0.423	1.42644202464307e-316	0.778101
Sdc2	0.912	0.273	1.1019177133338e-312	1.26259
Lum	0.965	0.377	1.09631114582161e-308	1.00213
Uap1	0.807	0.283	7.52363e-307	1.49455
Sema3c	0.482	0.034	1.18382e-306	1.22764
Col6a1	0.913	0.292	9.74432e-303	1.0383
Ogn	0.907	0.277	1.48736e-302	1.32895
Rnase4	0.96	0.451	3.03624e-301	1.38986
Tmsb4x	0.999	1	5.85737e-298	-1.80179
Serpine2	0.882	0.262	1.81419e-291	1.31596
S100a6	0.994	0.832	3.6309e-291	1.20424
Pla1a	0.737	0.155	4.92416e-290	1.50382
Dpep1	0.854	0.245	1.37437e-289	1.12403
Lpar1	0.772	0.178	1.1234e-288	1.20432
Ccdc80	0.946	0.359	2.73908e-287	1.38936
Ptgis	0.861	0.246	1.29559e-286	1.27402
Prelp	0.875	0.266	2.38378e-284	1.13841
Ugdh	0.692	0.188	3.43281e-283	1.40755
Nid1	0.913	0.338	8.87165e-281	1.41765
Atf5	0.813	0.231	1.28165e-280	1.54362
Ppp1r14b	0.72	0.23	2.38162e-280	1.30216
Fhl1	0.789	0.211	3.87319e-279	1.32973
Zbtb20	0.981	0.51	5.56712e-276	1.19237
Srgn	0.172	0.664	2.24322e-275	-2.82673
Mmp2	0.885	0.286	7.75226e-275	1.03118
Zfp385a	0.672	0.155	6.63278e-271	1.25831
Serpinb6a	0.937	0.438	1.13617e-267	1.28926
Gas1	0.867	0.271	3.65304e-266	1.24675
Rcn3	0.885	0.305	2.09992e-264	0.89055
Sh3bgrl3	0.842	0.875	1.53548e-258	-1.48163
Fbln1	0.851	0.273	1.72552e-258	1.00482
Serpinf1	0.877	0.303	2.99785e-258	0.918277
Col6a2	0.857	0.275	1.89738e-257	0.999923
Sod3	0.816	0.235	3.91229e-256	1.21216
Cd52	0.158	0.548	5.92648e-254	-3.26939
Ddah2	0.916	0.372	7.52192e-253	1.20617
H2B-EGFP	0.792	0.219	8.32013e-251	1.08397
Efemp1	0.436	0.034	9.16871e-250	1.22189
Ugp2	0.858	0.387	3.92822e-249	1.29823
Prkcdbp	0.946	0.421	4.30702e-248	1.19527
Pcolce	0.926	0.37	2.64035e-247	1.07312
Gng11	0.742	0.511	1.65665e-246	-1.1945
Qpct	0.686	0.159	1.6666e-243	1.15997
Cyba	0.788	0.837	1.03672e-242	-1.56024
Cfh	0.907	0.352	3.08601e-241	1.04316
Selm	0.964	0.446	5.43084e-238	1.00599
Pdlim2	0.864	0.324	1.00265e-237	1.24534
Ddr2	0.635	0.127	3.50317e-236	1.04018
Mxra8	0.835	0.274	3.61852e-236	0.951682
Tyrobp	0.194	0.498	6.35644e-236	-3.36437
Fgfr1	0.767	0.216	4.57362e-234	1.04677
Fcer1g	0.167	0.492	4.34622e-233	-3.59461
Klf4	0.95	0.571	2.64372e-231	1.43889
Pgf	0.575	0.096	1.88861e-229	1.17993
Mgll	0.453	0.285	2.86841e-223	-1.165
Cotl1	0.301	0.547	1.36989e-222	-2.02787
1700019D03Rik	0.391	0.03	6.82182e-221	0.736836
Tppp3	0.826	0.317	1.22396e-219	1.4758
Abca8a	0.776	0.241	1.72709e-219	0.948892
Ltbp4	0.951	0.452	1.91078e-218	1.01749
Crispld2	0.779	0.273	1.22537e-217	0.662415
Gpm6b	0.749	0.259	1.81423e-217	0.595953
Ctsb	0.912	0.805	2.34523e-215	-1.55427
Adamts2	0.725	0.207	3.04791e-215	0.852536
Apoe	0.882	0.873	3.70611e-213	-2.95854
Ms4a4d	0.696	0.195	6.37944e-213	0.811834
H2-D1	0.944	0.975	4.31566e-212	-1.26241
Ctss	0.096	0.498	2.19542e-210	-3.5291
C3	0.687	0.19	2.46475e-209	1.47064
Nenf	0.929	0.481	3.24393e-209	1.02133
Serpinh1	0.982	0.536	8.70124e-209	0.842118
Sfrp1	0.659	0.175	5.8571e-208	0.8374
Cryab	0.752	0.228	1.67069e-206	0.947376
Bicc1	0.73	0.226	5.07894e-206	0.764738
Selenbp1	0.731	0.219	4.04438e-205	1.17352
Aspn	0.758	0.236	2.38398e-204	1.15509
Nfix	0.789	0.262	2.27812e-203	0.921003
Coro1a	0.076	0.485	5.55056e-203	-2.43671
Tcf21	0.624	0.144	7.35968e-203	1.01755
Ifi27l2a	0.974	0.71	7.95179e-203	1.51084
Dbn1	0.626	0.149	1.49111e-202	0.984854
Loxl2	0.631	0.147	1.94052e-202	0.991835
Pam	0.858	0.333	4.04572e-202	1.11558
Crip2	0.973	0.529	5.9044e-201	0.970139
Sulf1	0.623	0.142	1.71065e-200	0.911862
Ebf1	0.938	0.453	4.0429e-200	1.07768
Jund	0.986	0.799	5.40307e-200	1.08641
Arhgdib	0.273	0.618	3.38688e-199	-1.78522
Cd53	0.04	0.46	4.81498e-196	-2.03141
Rhoj	0.843	0.332	4.25987e-194	0.789467
Cald1	0.899	0.417	2.07157e-192	0.568603
Btg1	0.689	0.802	3.47981e-191	-1.6744
Psap	0.93	0.886	4.86209e-191	-1.28471
Uqcc2	0.907	0.543	1.45038e-190	1.00625
Plxdc2	0.714	0.223	3.08264e-189	0.818477
Ctsd	0.816	0.737	1.69693e-188	-1.42286
Ly6c1	0.74	0.427	2.11862e-188	-0.935954
Pdgfra	0.626	0.156	8.13831e-188	0.886477
Tuba1a	0.98	0.683	1.83032e-187	0.897041
Cd63	0.968	0.529	2.37405e-187	0.729212
Cpq	0.768	0.265	3.30062e-187	0.89163
Gm9780	0.591	0.135	3.58378e-187	0.903294
Vcan	0.727	0.229	1.29864e-186	0.932069
Lama2	0.686	0.205	1.47166e-186	0.775565
Hspb8	0.393	0.043	1.65078e-186	0.778119
Laptm5	0.059	0.452	4.42169e-186	-2.02552
Fibin	0.662	0.206	1.14903e-185	0.668127
Ly6a	0.957	0.575	4.75138e-185	0.824109
Dap	0.882	0.429	5.63247e-185	0.996803
Cstb	0.639	0.621	6.27274e-183	-1.38473
Ecm1	0.861	0.437	4.66611e-182	1.165
Hs3st1	0.514	0.097	4.89569e-181	0.87451
Lgmn	0.26	0.471	6.39453e-181	-2.32019
Aes	0.915	0.505	2.57995e-179	0.935641
Nupr1	0.874	0.388	5.34744e-179	1.01396
Nedd4	0.851	0.369	5.37756e-178	0.661567
Cd74	0.345	0.46	8.83811e-178	-4.34375
Sptbn1	0.964	0.541	1.06726e-177	0.703783
Lrp1	0.92	0.477	1.17765e-177	0.968363
Tm4sf1	0.655	0.502	2.40973e-177	-1.2361
6030408B16Rik	0.513	0.099	6.90979e-176	0.95648
Col5a1	0.618	0.177	7.08969e-176	0.677531
Prss23	0.666	0.2	1.37927e-175	0.86996
Ftl1	1	0.993	6.83441e-175	-0.635071
Ngf	0.554	0.124	1.52136e-174	0.829408
Gpx8	0.693	0.23	2.48751e-174	0.690794
Slc43a3	0.833	0.341	7.94301e-174	0.87641
Spon2	0.595	0.15	1.27967e-171	1.01013
Sox9	0.542	0.118	1.30243e-171	0.87971
Ptpn18	0.074	0.462	3.70705e-171	-1.67418
C1qtnf7	0.607	0.158	2.53679e-170	0.910208
Nfia	0.783	0.299	1.74023e-169	0.827122
Aebp1	0.684	0.217	5.40033e-167	0.879826
Anxa1	0.91	0.516	1.16955e-166	1.03689
Timp3	0.85	0.386	6.04679e-166	0.640179
Ace	0.706	0.245	8.30548e-165	0.7293
Ebf2	0.529	0.117	1.17975e-164	0.830326
H2-Ab1	0.333	0.431	2.7415e-164	-3.0973
Htra1	0.652	0.22	6.83768e-163	0.608528
Phlda3	0.751	0.276	7.13043e-163	0.855265
Heg1	0.756	0.282	1.74231e-162	0.825229
Mgst1	0.817	0.343	1.90578e-162	0.765429
Col14a1	0.58	0.154	2.19012e-161	0.781842
Zeb1	0.699	0.234	6.28468e-161	0.845819
Sdpr	0.315	0.315	2.1341e-160	-1.71149
B2m	0.995	0.992	7.12137e-159	-0.951644
Carhsp1	0.793	0.34	8.52675e-159	0.921957
Ctsc	0.053	0.42	9.88787e-159	-2.63549
Lcp1	0.041	0.415	1.18392e-158	-1.68792
Pfn1	0.963	0.941	1.22524e-157	-1.0801
Ndn	0.584	0.156	1.53708e-157	0.776769
Arpc3	0.822	0.849	1.7117e-157	-0.861586
Psmb8	0.359	0.624	5.06976e-157	-1.25789
Cp	0.655	0.214	6.084e-157	0.778928
S100a16	0.896	0.46	1.14036e-156	0.53869
Fam49b	0.111	0.436	1.58352e-156	-1.47885
Snhg18	0.683	0.237	1.60758e-156	0.728775
Ucp2	0.074	0.445	5.23282e-156	-1.51169
Plpp3	0.865	0.405	3.82971e-155	0.776268
Myoc	0.4	0.06	1.49964e-154	1.16483
Pde1a	0.534	0.128	6.33683e-154	0.740105
Arpc2	0.844	0.88	7.23193e-154	-1.01639
Dclk1	0.52	0.12	1.18594e-153	0.759775
Scn7a	0.575	0.158	1.29805e-153	0.724806
Mtch1	0.933	0.537	1.73455e-153	0.812837
Angptl2	0.628	0.216	2.07866e-153	0.566954
Lgals3	0.118	0.415	2.22196e-153	-2.96059
Scd1	0.522	0.13	8.71942e-153	0.668775
Ntn1	0.445	0.083	4.71752e-152	0.659607
Ctsh	0.17	0.463	5.27945e-152	-1.68296
Copz2	0.711	0.269	4.94651e-151	0.629115
Crip1	0.992	0.942	1.56616e-150	1.02796
Cd36	0.228	0.377	2.94016e-150	-2.24392
H2-K1	0.82	0.873	3.15885e-150	-1.14285
Ctsz	0.796	0.72	8.25549e-150	-0.736277
Akap12	0.665	0.239	3.79091e-149	0.627804
Alox5ap	0.043	0.393	1.04191e-148	-2.25448
Adamtsl3	0.342	0.042	3.37895e-148	0.640611
Gsta3	0.535	0.156	4.01669e-148	0.622169
Calu	0.816	0.361	4.72866e-148	0.764939
Lgals1	0.991	0.786	5.4243e-148	0.662005
Mmp23	0.625	0.199	5.68315e-148	0.720012
Itih5	0.522	0.133	3.46533e-147	0.697924
Wfdc17	0.064	0.403	7.50419e-147	-2.87386
Lamb1	0.662	0.232	4.5829e-146	0.687692
Sub1	0.712	0.785	5.07237e-146	-1.00416
Nav1	0.739	0.291	1.52749e-145	0.860053
Npdc1	0.753	0.307	1.79218e-145	0.692756
H2-Aa	0.28	0.377	1.85888e-145	-3.22045
Prrx1	0.532	0.134	1.96331e-145	0.737624
Actr3	0.664	0.709	3.86248e-145	-0.968138
Kdelr3	0.626	0.212	1.38419e-144	0.622777
Rac2	0.066	0.423	2.58112e-144	-1.6953
Fth1	0.998	0.993	2.94145e-144	-0.851738
Ly6e	0.91	0.905	7.75694e-144	-1.18615
Slc9a3r2	0.418	0.335	2.60493e-143	-0.925855
Eng	0.564	0.4	3.31628e-143	-0.612745
Nnmt	0.587	0.181	1.00139e-142	0.641642
Creb5	0.602	0.187	1.1186e-142	0.885972
Fndc1	0.509	0.124	3.57463e-142	0.831345
Hmcn2	0.376	0.057	5.50355e-142	0.692697
Sulf2	0.583	0.175	5.84066e-141	0.846456
Slc25a5	0.689	0.754	1.12035e-140	-0.952313
Ret	0.303	0.032	5.22536e-140	0.656434
Ces1d	0.398	0.068	1.37903e-139	0.837085
C1qtnf2	0.581	0.176	3.97026e-139	0.693196
Bmp1	0.532	0.142	4.81474e-139	0.779883
Fabp5	0.313	0.495	7.956e-139	-2.04492
Abi3bp	0.536	0.153	4.79452e-138	0.645238
H2afz	0.804	0.776	6.26416e-138	-0.937755
Cyb5a	0.964	0.643	1.00536e-137	0.7203
Ms4a6c	0.022	0.351	3.16566e-137	-2.02435
H2-Eb1	0.249	0.325	8.55262e-137	-2.90735
Gngt2	0.137	0.472	9.25216e-137	-1.54149
Tgfbi	0.274	0.465	1.66038e-136	-1.94435
Rhoc	0.891	0.49	1.96625e-136	0.554145
H3f3a	0.977	0.968	4.74694e-136	-0.804153
Nrp1	0.519	0.553	6.85524e-134	-1.17652
Spi1	0.025	0.363	1.01017e-133	-1.58809
Sdcbp	0.744	0.692	1.14221e-133	-0.807174
Grn	0.615	0.626	2.39468e-133	-0.959978
Rora	0.614	0.203	3.078e-133	0.70803
Cxxc5	0.522	0.14	3.85035e-133	0.766659
Tgfbr3	0.448	0.101	4.12812e-132	0.601204
Antxr1	0.459	0.104	9.15612e-132	0.633734
Fxyd5	0.618	0.714	1.54251e-131	-1.23512
Rbms3	0.544	0.156	2.39741e-131	0.721193
Prdx5	0.74	0.65	1.41126e-130	-0.701992
Socs2	0.72	0.309	1.85297e-130	0.55665
Pmepa1	0.623	0.228	4.21767e-130	0.585235
Olfml3	0.71	0.306	4.92109e-130	0.530743
Nfic	0.837	0.418	6.72907e-129	0.747425
Fcgr3	0.029	0.344	7.7466e-129	-1.83804
Ifi30	0.128	0.41	1.47921e-128	-1.58576
Fkbp9	0.669	0.275	2.68475e-128	0.514865
Tnfaip6	0.383	0.074	3.03105e-128	0.82105
Txndc5	0.796	0.371	3.6854e-128	0.699472
Jade1	0.54	0.156	8.0337e-128	0.737689
Gpihbp1	0.218	0.314	8.70145e-128	-2.04937
Adamtsl5	0.383	0.07	8.71122e-128	0.642322
Srpx2	0.542	0.185	1.87373e-126	0.516564
S100a10	0.982	0.853	9.15186e-126	0.811528
Cdc42ep2	0.612	0.235	1.89498e-125	0.50625
Tspan13	0.114	0.397	3.04576e-125	-1.91151
Slfn2	0.073	0.415	3.26135e-125	-1.45925
Gm12840	0.404	0.081	6.14731e-125	1.17382
Ahnak	0.944	0.649	6.35887e-125	0.806582
Ccl6	0.085	0.366	8.38746e-125	-3.0521
Ccl9	0.04	0.341	1.142e-124	-2.56763
Trip10	0.56	0.173	1.31557e-124	0.697102
Thy1	0.445	0.104	1.5242e-124	0.842411
Col15a1	0.711	0.301	1.71885e-124	0.67538
Ifi205	0.488	0.137	2.81408e-124	0.657026
Cd68	0.036	0.345	2.91654e-124	-1.7561
Slco3a1	0.508	0.143	4.97103e-124	0.653162
Lama4	0.636	0.232	2.5009e-123	0.699331
Hcls1	0.015	0.326	4.31452e-122	-1.06628
Clta	0.855	0.802	9.16984e-122	-0.653658
Lst1	0.063	0.361	1.41416e-121	-1.78079
Aprt	0.302	0.521	1.56016e-121	-1.11498
Cxcl12	0.349	0.347	3.56905e-121	-1.70105
Ostf1	0.68	0.73	6.87646e-121	-0.78481
Rcn1	0.629	0.251	8.41634e-121	0.502855
Tnfaip8	0.046	0.37	9.72694e-121	-1.06662
Pkm	0.804	0.78	1.5569e-120	-0.91302
Tpd52	0.063	0.378	2.64661e-120	-1.38956
Lyn	0.059	0.38	4.07146e-120	-1.1526
Cd9	0.945	0.598	8.89439e-120	0.668109
Vat1	0.686	0.284	2.23905e-119	0.749131
Dstn	0.938	0.648	3.84428e-119	0.731921
Mt2	0.529	0.158	4.23272e-119	1.06523
Lilrb4a	0.011	0.316	1.22143e-118	-1.59775
Msrb1	0.423	0.442	1.77005e-118	-0.957301
Slc25a4	0.951	0.628	1.81934e-118	0.641117
Gmfg	0.036	0.347	3.27894e-118	-1.28292
Rgs2	0.044	0.368	3.37723e-118	-1.57747
Lefty1	0.417	0.093	4.23599e-118	0.587927
Ms4a6d	0.007	0.304	9.49633e-118	-1.6718
Emp1	0.861	0.467	9.48537e-117	0.66736
Tshz1	0.418	0.095	3.28108e-116	0.666464
Phlda1	0.753	0.344	5.73225e-116	0.816539
Vkorc1	0.765	0.36	7.05303e-116	0.615372
Dpysl3	0.591	0.213	8.18437e-116	0.620018
Ptprc	0.039	0.357	8.40019e-116	-1.31139
Efhd2	0.315	0.432	1.19519e-115	-0.993391
Gpr153	0.465	0.129	1.20287e-115	0.547857
Enpp2	0.446	0.118	8.72618e-115	0.648759
Gstm5	0.535	0.174	8.79387e-115	0.611716
Capza2	0.693	0.702	9.53762e-115	-0.72159
Fn1	0.566	0.404	2.605e-114	-0.870049
C1qb	0.177	0.315	3.39208e-114	-2.85844
Gpx1	0.888	0.794	5.77602e-114	-0.778297
Sept8	0.585	0.204	7.50859e-114	0.681417
C1qa	0.162	0.277	1.79474e-113	-2.74815
Fyb	0.04	0.342	3.43241e-113	-1.33841
Ybx3	0.602	0.218	3.73769e-113	0.636489
Sh3d19	0.443	0.112	5.35205e-113	0.599101
Cav1	0.196	0.321	1.07519e-112	-1.82362
Gm2a	0.457	0.509	5.66398e-112	-1.00005
Msn	0.641	0.716	8.59106e-112	-0.827672
Unc93b1	0.176	0.427	1.16717e-111	-1.20137
S100a11	0.989	0.884	2.59664e-111	0.648044
Lmna	0.855	0.468	2.96815e-111	0.635527
Antxr2	0.477	0.133	3.29184e-111	0.644891
Chpf	0.501	0.164	4.29822e-111	0.511901
Smim14	0.93	0.604	8.20259e-111	0.654456
Ms4a6b	0.026	0.318	1.16703e-109	-1.3847
Palm	0.534	0.19	2.04862e-109	0.500017
Matn2	0.543	0.194	2.12448e-109	0.547223
Tm6sf1	0.019	0.314	2.57484e-109	-1.01409
Rab34	0.534	0.178	3.34331e-109	0.582068
Tspan3	0.72	0.327	6.75378e-109	0.616239
Rab23	0.417	0.103	1.18466e-108	0.573846
Ccr2	0.02	0.3	1.6104e-108	-1.81508
Itgb2	0.015	0.309	2.11138e-108	-1.18362
Cd200	0.276	0.285	5.25426e-108	-1.00504
Tmem45a	0.466	0.141	8.67067e-108	0.510204
Fcgr2b	0.022	0.297	1.53309e-107	-1.27225
Clmp	0.525	0.171	1.72008e-107	0.64148
Glipr2	0.611	0.234	2.95411e-107	0.67431
Arpc4	0.577	0.606	3.4223e-107	-0.677479
Psme1	0.478	0.598	5.01414e-107	-0.803704
Amotl1	0.575	0.217	7.90806e-107	0.549041
Cfl1	0.953	0.952	8.77393e-107	-0.773074
Tmed3	0.868	0.5	1.33716e-106	0.653268
Gpx7	0.569	0.215	1.46889e-106	0.531528
Ptms	0.92	0.589	1.64018e-106	0.682807
Npc2	0.885	0.801	2.35685e-106	-0.59893
Stk17b	0.035	0.344	5.58696e-106	-1.18057
AF251705	0.009	0.289	5.6831e-106	-1.25894
Tnfaip2	0.584	0.217	8.9632e-106	0.633137
Eno1	0.59	0.635	2.25561e-105	-0.882173
Hmgn1	0.857	0.479	3.22668e-105	0.607629
AW112010	0.357	0.425	3.97605e-105	-1.25864
Cd48	0.019	0.301	4.36669e-105	-1.08292
Ly86	0.015	0.294	1.23088e-104	-1.30651
D630033O11Rik	0.273	0.038	1.49709e-104	0.513583
Arpc5	0.746	0.735	4.8147e-104	-0.675278
Glis2	0.389	0.093	7.02042e-104	0.512446
Maged2	0.547	0.189	9.98318e-104	0.725678
Mpeg1	0.02	0.296	2.29994e-103	-1.26154
Pld4	0.02	0.291	6.76491e-103	-1.17738
Slc44a1	0.575	0.212	8.62058e-103	0.632219
Mrgprf	0.352	0.073	1.73271e-102	0.55709
Ctsa	0.383	0.478	1.9051e-102	-0.823827
Scn1b	0.466	0.137	2.7302e-102	0.583571
Abca8b	0.362	0.079	2.87633e-102	0.538789
Capzb	0.781	0.761	6.57979e-102	-0.610514
Vamp8	0.528	0.59	1.77715e-101	-0.676116
C5ar1	0.02	0.293	2.49485e-101	-1.73834
Map1lc3a	0.765	0.386	2.58699e-101	0.549307
Efemp2	0.546	0.201	7.58846e-101	0.535159
Add3	0.635	0.272	8.67583e-101	0.520839
Sgce	0.574	0.222	9.82225e-101	0.551991
Golim4	0.576	0.225	1.1745e-100	0.527182
Ptpn6	0.021	0.302	1.3753e-100	-1.05715
Ets1	0.218	0.312	2.57627e-100	-0.876056
Pkd2	0.5	0.17	3.03287e-100	0.504492
Cd14	0.043	0.306	4.86914e-100	-1.8519
Plin2	0.334	0.45	7.3563e-100	-1.08978
Rap1b	0.753	0.724	6.44988e-99	-0.625506
Taldo1	0.603	0.633	3.78977e-98	-0.747265
Cxcl1	0.525	0.181	4.33095e-98	1.20823
Pdpn	0.499	0.176	6.69691e-98	0.502706
Gem	0.484	0.154	8.96102e-98	0.696735
Gas7	0.522	0.182	1.90174e-97	0.688767
Spp1	0.054	0.324	6.5318e-97	-3.7034
Tpst1	0.659	0.29	7.61408e-97	0.612331
Shisa5	0.797	0.777	1.0288e-96	-0.691826
Pitpna	0.448	0.516	3.60285e-96	-0.745853
Vasn	0.334	0.069	3.61458e-96	0.52778
Ar	0.41	0.111	1.09297e-95	0.558003
Pid1	0.461	0.458	3.2654e-95	-0.712785
Rhoq	0.502	0.17	8.76349e-95	0.636393
Drap1	0.806	0.446	1.19106e-94	0.595296
Hspa8	0.98	0.975	2.0643e-94	-0.809221
Cd93	0.055	0.334	2.28755e-94	-1.25359
Aif1	0.028	0.284	2.39752e-94	-1.45209
Tusc3	0.621	0.266	9.96735e-94	0.538755
Fam105a	0.02	0.277	1.05652e-93	-0.966296
Steap3	0.42	0.119	2.49337e-93	0.597626
Cdkn2c	0.501	0.18	2.65737e-93	0.522601
Ncf2	0.015	0.278	1.1042e-92	-0.96859
Rras	0.66	0.306	1.34232e-92	0.530296
Selplg	0.023	0.289	4.49496e-92	-1.05378
Tceal8	0.66	0.305	5.69865e-92	0.511641
Dab2	0.165	0.367	7.77937e-92	-1.21277
Rnf11	0.68	0.317	2.08609e-91	0.620075
Gm9843	0.868	0.852	3.67771e-91	-0.76344
Ldha	0.819	0.801	3.99001e-91	-0.721725
Rbm3	0.799	0.75	4.31641e-91	-0.541755
Bcl7c	0.671	0.309	5.23839e-91	0.566039
Gnai2	0.895	0.873	6.85682e-91	-0.610165
Fyn	0.588	0.248	7.70877e-91	0.501318
Plek	0.033	0.283	8.7968e-91	-1.08772
Pycard	0.231	0.383	9.76106e-91	-0.864057
Cybb	0.021	0.282	4.21078e-90	-1.20586
Vasp	0.378	0.511	5.55359e-90	-0.777356
Icam2	0.093	0.282	7.25295e-90	-1.43133
Thra	0.628	0.283	1.45941e-89	0.502551
Cd302	0.795	0.442	3.1868e-89	0.536818
Esam	0.082	0.268	8.23105e-89	-1.59226
Fam96a	0.323	0.427	8.39526e-89	-0.696477
Clec4a3	0.009	0.253	1.44018e-88	-1.08174
Ptp4a3	0.345	0.347	1.75408e-88	-0.652406
Tmem107	0.405	0.115	1.93309e-88	0.537627
AI662270	0.015	0.26	2.04507e-88	-0.874005
Hexb	0.495	0.481	2.2455e-88	-0.617445
Slc6a6	0.24	0.402	2.67356e-88	-1.06371
Nrros	0.015	0.267	4.70895e-88	-0.878155
Hexa	0.614	0.56	1.04263e-87	-0.516749
Arf4	0.91	0.612	1.52459e-87	0.60361
Il1b	0.046	0.302	2.86306e-87	-2.47174
Egr1	0.826	0.522	3.46255e-87	0.955566
Mndal	0.208	0.376	1.09423e-86	-0.916605
Cox5a	0.745	0.72	2.11118e-86	-0.524824
Mef2c	0.336	0.46	2.53901e-86	-0.92825
H3f3b	0.988	0.986	4.20647e-86	-0.663145
Hnrnpf	0.801	0.832	5.20175e-86	-0.651755
Csf1r	0.041	0.298	5.35641e-86	-1.23304
Gimap6	0.101	0.305	1.14804e-85	-1.31936
Gstp1	0.523	0.197	1.97341e-85	0.62722
Tgfbr2	0.621	0.275	3.26613e-85	0.618277
Zfyve21	0.528	0.204	5.71412e-85	0.549316
Dag1	0.547	0.22	1.06243e-84	0.520918
Limd2	0.095	0.326	1.54727e-84	-1.14694
Arhgap31	0.212	0.341	2.40405e-84	-0.969194
Egfl7	0.142	0.276	6.61985e-84	-1.60587
Clec4a2	0.016	0.257	1.68702e-83	-1.08773
Tmem159	0.54	0.212	2.02305e-83	0.596344
Emb	0.016	0.254	2.54101e-83	-0.998106
AB124611	0.014	0.258	3.41749e-83	-0.851893
Pecam1	0.118	0.272	4.97979e-83	-1.25742
H2-DMa	0.059	0.299	5.99636e-83	-1.31878
Calm1	0.971	0.959	1.18223e-82	-0.741916
Samhd1	0.184	0.378	1.50329e-82	-0.907043
Cyth4	0.019	0.258	2.54555e-82	-0.834714
Jun	0.953	0.747	3.26938e-82	0.797096
Sntb2	0.568	0.24	4.08845e-82	0.523108
Plac8	0.056	0.287	5.30193e-82	-2.32559
Cfp	0.021	0.256	6.32029e-82	-1.22631
Pura	0.74	0.395	6.61546e-82	0.514015
Snx18	0.648	0.306	1.1227e-81	0.533233
Twsg1	0.407	0.127	1.12967e-81	0.510625
Snx21	0.47	0.168	1.69504e-81	0.508753
Fam114a1	0.459	0.159	2.06709e-81	0.510402
Fndc3b	0.569	0.242	3.08607e-81	0.530226
Cxcl2	0.053	0.286	3.74642e-81	-2.79255
Snx5	0.363	0.447	6.3225e-81	-0.690799
Tpm3	0.756	0.769	6.48411e-81	-0.606637
Lamb2	0.466	0.167	7.10351e-81	0.511593
Rgs10	0.39	0.437	3.91193e-80	-0.705386
Emp3	0.952	0.708	9.62783e-80	0.626829
Rgcc	0.123	0.307	1.11769e-79	-1.48615
Tln1	0.518	0.547	1.42043e-79	-0.56495
Mustn1	0.282	0.061	5.0607e-79	0.550725
Tbrg1	0.737	0.396	5.99943e-79	0.516986
C1qc	0.088	0.27	7.93308e-79	-2.47496
Plekho1	0.026	0.263	1.04359e-78	-0.748676
Spry2	0.345	0.094	2.03015e-78	0.538669
Actr2	0.45	0.543	3.21965e-78	-0.702814
Sash1	0.573	0.249	3.3501e-78	0.508018
Skap2	0.078	0.32	1.03936e-77	-0.885038
Tmem176b	0.093	0.325	3.21819e-77	-1.33615
Ptpn1	0.315	0.426	7.45335e-77	-0.743862
Scd2	0.454	0.163	1.98211e-76	0.508245
S100a8	0.359	0.346	4.01517e-76	-2.53676
Il10rb	0.372	0.428	6.56357e-76	-0.565566
Card19	0.338	0.395	8.56428e-76	-0.599891
Actb	0.996	0.998	2.43235e-75	-1.19708
Ncf4	0.026	0.254	3.3114e-75	-0.836792
Man1a	0.582	0.263	3.52793e-75	0.516801
Id1	0.204	0.312	4.2809e-75	-1.31692
Pf4	0.116	0.295	7.59019e-75	-2.56621
Rock2	0.521	0.214	2.16377e-74	0.518868
Errfi1	0.474	0.177	4.5026e-74	0.634631
Pabpc1	0.874	0.812	5.13953e-74	-0.523734
Fli1	0.093	0.314	7.64246e-74	-0.845215
Cbx5	0.515	0.213	7.9696e-74	0.505344
Cst3	0.991	0.952	1.47251e-73	-0.725086
BC028528	0.08	0.313	1.99037e-73	-0.904261
Pqlc3	0.464	0.174	3.72928e-73	0.562411
Sfr1	0.837	0.534	1.04363e-72	0.56412
Serinc3	0.504	0.56	1.22339e-72	-0.613981
Tmbim6	0.804	0.809	2.30113e-72	-0.560821
Ninj1	0.279	0.368	3.97718e-72	-0.780448
Ckb	0.802	0.481	4.14125e-72	0.579914
Pim1	0.201	0.401	4.30184e-72	-1.14868
Ifitm3	0.986	0.913	8.00093e-72	-0.540714
Dpysl2	0.775	0.458	1.1395e-71	0.507272
Marcksl1	0.053	0.294	1.27028e-71	-1.05882
Ctnnbip1	0.2	0.308	3.59186e-71	-0.741548
Cav2	0.07	0.257	4.97549e-71	-1.13982
Rhob	0.735	0.412	1.81207e-70	0.597698
Vsir	0.187	0.343	7.85727e-70	-0.746995
Cyr61	0.542	0.237	1.02034e-69	0.868086
Itpkb	0.153	0.299	2.54597e-69	-0.833248
Mcl1	0.523	0.55	2.58551e-69	-0.60568
Clic1	0.877	0.852	3.22895e-69	-0.526785
Arl6ip1	0.639	0.648	6.0163e-69	-0.517088
Ier5	0.491	0.622	2.99555e-68	-0.831103
Syngr2	0.321	0.392	8.19237e-68	-0.565659
Hmox1	0.221	0.317	1.38801e-67	-1.85395
M6pr	0.352	0.412	1.45865e-67	-0.50186
Sgk1	0.233	0.358	3.28907e-67	-0.958833
Adam15	0.367	0.384	6.07105e-67	-0.542598
S100a4	0.417	0.413	6.72797e-67	-1.00621
Nfkbia	0.571	0.663	2.17443e-66	-0.939254
Prcp	0.215	0.324	2.22333e-66	-0.591572
Anp32a	0.582	0.615	5.15732e-66	-0.578385
Snx2	0.352	0.411	1.08412e-65	-0.55863
Foxp1	0.338	0.418	1.21887e-65	-0.654293
Pltp	0.28	0.283	1.92331e-65	-0.511963
Crlf2	0.187	0.352	2.03368e-65	-0.660518
Arl4c	0.055	0.276	6.13062e-65	-0.780633
Ifi203	0.274	0.409	1.09488e-64	-0.803564
Grb2	0.282	0.394	5.23309e-64	-0.577797
Psmb9	0.116	0.31	1.25658e-63	-0.739232
Rnf130	0.322	0.398	1.76008e-63	-0.532499
Hmgb2	0.278	0.396	4.85426e-63	-0.864311
Mafb	0.282	0.4	1.72046e-62	-1.15024
Hn1	0.847	0.603	3.6352e-62	0.59589
S100a9	0.272	0.257	1.21106e-61	-2.18995
Tgfb1	0.402	0.516	3.3262e-61	-0.71439
Sept4	0.13	0.269	1.26709e-60	-1.00272
Gsr	0.207	0.274	2.57129e-60	-0.710162
Anxa3	0.783	0.509	5.10876e-60	0.666241
Irf8	0.152	0.329	1.13743e-59	-0.859737
Atp1a1	0.41	0.442	2.37477e-59	-0.500571
Elk3	0.2	0.327	6.57427e-59	-0.685071
Cd44	0.137	0.299	1.1539e-58	-0.840315
Rnpep	0.164	0.337	3.94985e-58	-0.632099
Evi2a	0.056	0.251	7.54675e-58	-0.7323
Bst2	0.57	0.587	9.91028e-57	-0.687659
Rnf149	0.158	0.317	3.26525e-56	-0.712804
Ier3	0.359	0.442	7.06593e-56	-1.06224
Myh9	0.308	0.425	1.99527e-55	-0.675328
Apobec3	0.121	0.293	6.67979e-55	-0.775534
Picalm	0.412	0.464	2.84137e-54	-0.512988
Smpdl3a	0.459	0.498	3.79489e-54	-0.57276
Lrrfip1	0.162	0.342	7.29196e-54	-0.689666
Ptbp3	0.367	0.438	8.5058e-54	-0.506804
Zyx	0.692	0.41	8.73293e-54	0.539128
Gusb	0.306	0.394	1.1335e-53	-0.53565
Man2b1	0.152	0.296	2.64048e-53	-0.628234
Psmb10	0.389	0.471	2.71335e-53	-0.538612
Ehd4	0.165	0.317	9.45654e-52	-0.716841
Rcsd1	0.116	0.264	2.7814e-51	-0.614594
Sp100	0.256	0.366	3.34211e-51	-0.604282
Hpcal1	0.252	0.369	6.51872e-51	-0.545187
Irf5	0.103	0.262	1.2937e-48	-0.631533
Dusp6	0.118	0.26	1.36131e-48	-0.619899
Adgre5	0.213	0.322	3.89599e-48	-0.577605
Kctd12	0.101	0.285	7.40575e-47	-0.668454
Cxcl16	0.261	0.361	7.69017e-47	-0.748618
Dhrs3	0.283	0.384	1.53501e-44	-0.586392
Ier2	0.876	0.751	8.69486e-44	0.715558
Cap1	0.169	0.302	1.4931e-43	-0.547891
Casp8	0.122	0.255	2.99925e-43	-0.509277
Prkcd	0.164	0.292	2.47713e-42	-0.514785
Hif1a	0.196	0.301	2.87991e-41	-0.538696
Trim30a	0.111	0.263	8.0962e-39	-0.597833
Tuba1c	0.142	0.263	4.4304e-38	-0.560226
Rtp4	0.119	0.278	3.92549e-35	-0.705916
Rps18-ps3	0.484	0.544	4.95761e-34	-0.504809
Hspa1a	0.453	0.371	6.17999e-32	-0.629596
Postn	0.276	0.177	9.10638e-30	-0.603798
Ccl2	0.145	0.288	2.54769e-28	-1.63557
Thbs1	0.281	0.283	7.08564e-28	-0.777866
Trf	0.221	0.288	3.99625e-27	-0.61913
AI607873	0.162	0.258	2.77865e-26	-0.500234
Cdkn1a	0.633	0.483	2.23299e-23	0.585315
Serpine1	0.276	0.134	7.87461e-20	0.558798

## Sheet: BC vs rest
Gene	pct.1	pct.2	p_val_adj	Log2FoldChange
Cd79a	0.995	0.026	0	4.64969
Cd79b	0.989	0.055	0	4.2076
Ly6d	0.919	0.029	0	4.03188
Ms4a1	0.859	0.011	0	3.33509
H2-DMb2	0.9	0.041	0	3.23527
Fcmr	0.778	0.013	0	3.06422
Gm43603	0.776	0.016	0	2.82442
Cd74	1	0.42	0	2.82111
Ltb	0.854	0.078	0	2.74592
Mzb1	0.662	0.011	0	2.72317
Ccr7	0.675	0.049	0	2.67402
Cd37	0.847	0.16	0	2.65631
Ptprcap	0.843	0.063	0	2.59784
Bank1	0.718	0.022	0	2.52863
H2-Ob	0.704	0.024	0	2.447
Ebf1	0.956	0.456	0	2.304
Fcer2a	0.586	0.005	0	2.26929
Siglecg	0.628	0.015	0	2.22939
Cd69	0.569	0.05	0	2.18702
H2-Aa	0.988	0.334	0	2.18399
H2-Oa	0.617	0.027	0	2.09028
Gm8369	0.574	0.046	0	2.08541
H2-Eb1	0.985	0.28	0	2.08069
Ralgps2	0.599	0.033	0	2.04412
Vpreb3	0.47	0.007	0	1.98987
Fcrla	0.55	0.01	0	1.97999
Apobec3	0.768	0.253	0	1.94251
H2-Ab1	0.993	0.391	0	1.92105
Gm43291	0.382	0.003	0	1.88017
Hvcn1	0.53	0.053	0	1.87976
Limd2	0.798	0.282	0	1.87342
Mef2c	0.847	0.429	0	1.85645
Pou2af1	0.475	0.007	0	1.81816
Rps27	1	0.999	0	1.74543
Tnfrsf13c	0.482	0.005	0	1.74415
Cd19	0.493	0.004	0	1.73237
Btg1	0.983	0.783	0	1.70929
Shisa5	0.959	0.767	0	1.66737
Foxp1	0.752	0.393	0	1.61199
Pax5	0.406	0.003	0	1.555
Serp1	0.838	0.588	0	1.46789
Rps27rt	0.989	0.902	0	1.45891
Rps24	1	0.991	0	1.40838
Fau	1	0.994	0	1.35346
Rps15a	1	0.991	0	1.34718
Rpl13a	1	0.995	0	1.34174
Rpl12	0.996	0.915	0	1.32476
H3f3a	0.997	0.966	0	1.28253
Rpl18a	1	0.998	0	1.26262
Rps20	1	0.979	0	1.25318
Rps13	0.999	0.984	0	1.24589
Rps19	1	0.996	0	1.22592
Rps7	1	0.986	0	1.16781
Rps15	1	0.989	0	1.13011
Rpl17	1	0.993	0	1.12206
Rps10	0.997	0.972	0	1.08504
Rpl39	1	0.992	0	1.07883
Rpl21	1	0.993	0	1.04702
Rps18	1	0.992	0	1.04034
Rps16	1	0.996	0	1.01747
Rps3a1	1	0.988	0	1.01026
Rpl37a	1	0.998	0	1.00523
Rpl19	1	0.993	0	1.00486
Rps3	1	0.988	0	1.00237
Rpl8	1	0.99	0	0.991369
Rplp2	1	0.995	0	0.979175
Rpl32	1	0.993	0	0.97022
Rpl34	1	0.991	0	0.962166
Rpl13	1	0.997	0	0.943756
Rpl27a	1	0.992	0	0.936823
Rpl23	1	0.992	0	0.929215
Itm2b	0.831	0.989	0	-1.81725
App	0.045	0.745	0	-2.07383
Anxa5	0.2	0.858	0	-2.22125
Cst3	0.714	0.969	0	-2.29051
Anxa2	0.123	0.833	0	-2.47003
Ifitm2	0.2	0.927	0	-2.74502
Ctsb	0.229	0.847	0	-2.99502
Ifitm3	0.366	0.95	0	-3.12288
Ctsl	0.13	0.784	3.81778457192744e-317	-2.4482
Fcrl1	0.394	0.019	1.21596051416642e-315	1.45297
Rpl35a	1	0.996	1.36738825410104e-312	0.840789
Rpl26	1	0.992	1.14351919027988e-311	0.892855
Vim	0.554	0.925	7.44137e-307	-2.19634
Fchsd2	0.453	0.1	1.95992e-306	1.57642
Rps5	1	0.993	1.62766e-302	0.913576
Rpsa	0.997	0.961	3.25881e-299	1.06368
Dusp2	0.603	0.1	3.31092e-297	2.10719
Rpl9	1	0.991	4.99122e-297	0.888758
Rps6	0.999	0.99	9.75768e-297	0.897068
Chchd10	0.498	0.048	1.74497e-295	1.74608
Cd24a	0.607	0.089	5.44758e-295	1.95001
Rpl36	1	0.987	8.72244e-292	0.941598
Rpl18	1	0.982	2.70013e-291	0.944192
Lamb3	0.406	0.017	8.37189e-290	1.58826
Rpl30	0.999	0.967	4.72331e-284	1.00854
Rps21	0.999	0.979	5.57473e-282	0.975641
S100a6	0.443	0.867	8.08231e-281	-2.53662
Rps14	1	0.997	1.40339e-279	0.775024
Rhoh	0.545	0.111	3.58699e-278	1.66926
Bcl11a	0.411	0.021	2.00562e-276	1.54635
Coro1a	0.955	0.43	3.13611e-275	1.52865
Sepp1	0.232	0.814	8.65526e-275	-2.22495
Rps26	0.999	0.966	2.2356e-274	0.973586
Rpl11	1	0.988	9.74456e-274	0.853675
Rpl38	1	0.991	1.16254e-272	0.963922
Rps4x	1	0.99	5.46174e-271	0.808752
Psap	0.523	0.91	8.85328e-271	-2.0403
Gimap1	0.727	0.172	1.89394e-269	1.76691
Spib	0.33	0.005	3.98105e-269	1.33608
Hmha1	0.625	0.188	4.2597e-269	1.6251
Lgals1	0.372	0.824	4.78844e-269	-2.60202
Stk17b	0.727	0.3	7.52084e-268	1.67956
Cd22	0.325	0.009	8.19629e-268	1.21304
Rac2	0.87	0.373	4.69431e-263	1.58035
Cd52	0.981	0.496	5.65129e-263	1.41512
Rps9	1	0.991	1.48584e-261	0.826402
Cxcr5	0.306	0.004	4.70766e-261	1.2244
Gm26740	0.597	0.159	2.90711e-260	1.57875
Pou2f2	0.65	0.161	4.63829e-257	1.66984
Rps23	0.999	0.997	7.22868e-257	0.72938
Ctsd	0.206	0.774	1.17423e-256	-2.58276
Lamp1	0.352	0.867	1.24117e-255	-1.63276
Rps29	1	0.999	2.12634e-253	0.82042
Cd2	0.477	0.043	1.45163e-250	1.5545
Rpl27	0.985	0.923	1.28292e-249	0.992899
Igfbp7	0.438	0.731	3.73219e-249	-3.29264
Ahnak	0.095	0.702	4.76958e-248	-1.74445
H2-DMa	0.775	0.255	8.80094e-247	1.59736
Rpl4	1	0.967	1.95916e-244	0.919687
Btla	0.336	0.014	3.5738e-239	1.26493
Rps25	0.999	0.989	2.33559e-236	0.800402
Atox1	0.34	0.855	3.13569e-236	-1.51602
Rpl35	1	0.978	9.2867e-236	0.868032
Rps11	1	0.993	1.52993e-235	0.830151
Sparc	0.252	0.683	4.35732e-235	-3.55391
Itgb1	0.075	0.661	2.70661e-234	-1.66675
Ctss	0.756	0.455	2.24606e-232	-1.03124
Fkbp1a	0.277	0.817	1.52633e-231	-1.64302
Tspan32	0.443	0.075	1.71099e-230	1.42651
Sell	0.537	0.084	2.69506e-229	1.61433
Ftl1	0.98	0.995	4.5133e-229	-2.04666
Arhgdib	0.924	0.576	1.72574e-227	1.33235
Blk	0.273	0.004	4.21568e-226	1.05872
Rpl6	1	0.989	7.02868e-226	0.769007
Ly6e	0.989	0.901	3.6182e-225	1.02332
Pold4	0.579	0.373	1.69352e-222	1.19086
Marcks	0.1	0.675	3.18151e-221	-1.65042
Cd55	0.583	0.2	1.27117e-219	1.527
Cnp	0.495	0.172	3.19618e-218	1.34457
Nrp1	0.037	0.581	1.39771e-214	-2.10101
Rpl23a	1	0.993	7.78748e-214	0.756112
Dcn	0.595	0.616	2.42383e-211	-3.51444
Rpl10a	1	0.957	3.08326e-210	0.881908
Trim7	0.29	0.018	1.18273e-209	1.13039
Grn	0.108	0.656	9.91355e-209	-1.81784
Laptm4a	0.345	0.831	6.32311e-208	-1.52732
Dstn	0.138	0.698	9.37708e-208	-1.54924
Myl12a	0.613	0.938	5.29459e-207	-1.26902
Gm9843	0.944	0.848	6.98912e-207	1.22378
Rpl14	0.999	0.985	4.81457e-206	0.76761
Prdx1	0.559	0.921	9.8752e-206	-1.38912
Itm2c	0.071	0.618	3.89927e-204	-1.43558
S100a11	0.605	0.908	1.40396e-202	-1.52477
Serpinb1a	0.446	0.079	3.55208e-202	1.45644
Rps8	1	0.997	1.45458e-201	0.636555
Blnk	0.393	0.102	1.06866e-199	1.19491
Lyz2	0.386	0.675	8.08784e-196	-4.28563
Tnfrsf1a	0.033	0.547	2.2696e-194	-1.32905
Rpl36a	0.993	0.958	1.29619e-193	0.859696
Smim14	0.77	0.617	3.51919e-193	1.02513
Gpr18	0.336	0.028	2.29835e-192	1.1868
Arhgef1	0.631	0.368	2.2205e-191	1.20207
Cd9	0.13	0.649	6.51111e-191	-2.08942
mt-Co3	1	0.998	5.82767e-189	0.538869
Gimap6	0.766	0.264	2.01589e-188	1.32891
Lrp1	0.032	0.534	2.85663e-188	-1.57478
Anxa3	0.045	0.555	8.68468e-188	-1.58197
Arpc5l	0.57	0.376	1.71163e-187	1.02958
Npc2	0.386	0.831	2.39795e-187	-1.45313
Snn	0.372	0.049	1.06367e-186	1.24132
Stap1	0.451	0.106	5.57586e-186	1.42876
Bsg	0.282	0.785	5.63879e-185	-1.30827
Ezr	0.534	0.241	1.43069e-183	1.24469
Aplp2	0.068	0.575	1.22528e-182	-1.53639
Serpinh1	0.12	0.591	4.77124e-182	-2.51876
Tnfrsf13b	0.395	0.1	8.72116e-182	1.17272
Il2rg	0.539	0.198	2.45728e-178	1.36807
Gm2000	0.907	0.81	7.73832e-178	0.916414
Pid1	0.016	0.485	8.80519e-178	-1.6062
Rps28	1	0.989	1.35825e-176	0.733061
Napsa	0.638	0.188	1.03102e-175	1.3571
Lamp2	0.138	0.657	9.59222e-175	-1.25629
Ppdpf	0.598	0.436	3.91871e-174	1.00085
Scd1	0.406	0.14	4.08431e-174	1.14544
Cdkn1a	0.041	0.519	2.78961e-172	-1.90635
Cd302	0.024	0.491	8.63026e-172	-1.38761
Capns1	0.302	0.792	2.86377e-171	-1.17125
Gm11808	0.8	0.696	4.26417e-171	1.02113
Tsc22d3	0.736	0.526	4.46578e-171	1.22303
Rpl41	1	0.999	1.03639e-169	0.570636
Rpl7	0.997	0.982	1.30973e-169	0.72379
Gsn	0.728	0.814	1.57967e-169	-3.15611
Mt1	0.095	0.577	5.42408e-169	-2.16476
Anxa1	0.08	0.569	1.10929e-168	-1.58015
Tmem256	0.182	0.693	1.92735e-168	-1.17625
Cd63	0.129	0.583	2.55999e-168	-2.21563
Fam65b	0.322	0.036	3.12822e-168	1.1633
Fabp4	0.583	0.693	3.70233e-168	-3.29754
Ptms	0.133	0.638	8.74018e-168	-1.40716
Mgp	0.595	0.637	5.73892e-167	-2.74927
Ikzf3	0.256	0.01	5.81035e-167	0.959202
Prkcb	0.383	0.103	8.39454e-167	1.14931
Rhoc	0.064	0.543	2.15423e-166	-1.67029
Gpr183	0.43	0.111	4.49964e-166	1.4038
Rrbp1	0.273	0.764	1.04962e-165	-1.26079
Crip2	0.116	0.584	7.8591e-165	-2.11827
Gm9493	0.826	0.724	1.93079e-164	0.95932
Pdia3	0.296	0.777	2.96642e-164	-1.22283
Sparcl1	0.096	0.553	3.52151e-164	-2.3579
Rpl37	1	0.996	3.67949e-164	0.658305
Gpr171	0.369	0.05	2.2751e-163	1.37269
Rpl22	0.975	0.939	2.50982e-163	0.789494
Csk	0.485	0.312	7.64582e-163	0.996578
Txn1	0.357	0.81	1.95848e-161	-1.17263
Tspo	0.458	0.855	2.3653e-160	-1.22196
Rps27l	0.387	0.832	5.05511e-160	-1.14109
Rnase6	0.374	0.062	2.20147e-159	1.19634
Rplp1	1	0.996	2.87966e-159	0.566143
Dbi	0.277	0.749	1.12206e-158	-1.27755
Lmna	0.053	0.519	3.19671e-158	-1.37395
Akr1a1	0.337	0.795	3.36757e-158	-1.18032
Cald1	0.031	0.473	4.30831e-156	-1.72808
Tgfbi	0.035	0.477	9.76789e-155	-2.36885
Swap70	0.378	0.118	3.25683e-154	1.09744
Myl6	0.822	0.976	8.62089e-154	-0.970897
Uba52	0.652	0.547	6.01584e-153	1.01804
Clec2i	0.289	0.042	8.23896e-153	1.09163
Ecm1	0.041	0.489	8.63752e-153	-1.47964
Rtn4	0.242	0.727	2.28776e-152	-1.11195
Cd34	0.107	0.54	1.15275e-151	-2.11796
Rps27a	1	0.995	5.3701e-151	0.573837
S100a13	0.245	0.724	5.46882e-151	-1.06997
Eif3f	0.943	0.847	2.19547e-149	0.815187
Rpl5	0.969	0.918	6.62814e-149	0.771071
Cd81	0.605	0.731	6.70718e-149	-1.54756
Satb1	0.374	0.057	1.30335e-148	1.21004
Eef1a1	1	0.998	1.42406e-148	0.541493
Rpl3	1	0.975	1.68737e-148	0.687463
Sep15	0.401	0.826	1.39309e-147	-1.07007
Comt	0.056	0.505	1.44831e-146	-1.11535
Crlf3	0.491	0.221	2.75757e-146	1.1408
Apoe	0.75	0.881	2.86163e-146	-2.62123
Emp1	0.071	0.517	8.49967e-146	-1.61447
Tbc1d10c	0.32	0.038	9.02334e-146	1.05616
Fcer1g	0.142	0.491	1.19382e-145	-3.3076
Gng11	0.128	0.549	2.54515e-145	-2.30738
Cstb	0.224	0.646	3.0862e-145	-1.82219
Selm	0.064	0.504	5.91366e-144	-1.62592
Pkm	0.425	0.803	7.55435e-144	-1.3323
Ldha	0.405	0.826	1.96987e-143	-1.13355
Tagln2	0.431	0.846	3.02441e-143	-1.09838
Lpl	0.079	0.515	5.25239e-143	-1.87894
Rabgap1l	0.313	0.089	7.1404e-143	0.972366
S100a16	0.073	0.513	7.39145e-143	-1.66247
Ier3	0.041	0.46	1.64491e-142	-1.90097
Il16	0.374	0.12	3.01102e-142	1.14948
Timp2	0.103	0.541	3.01362e-142	-1.83159
Gga2	0.253	0.088	8.18416e-142	0.79757
Ckb	0.081	0.527	1.50169e-141	-1.48912
Tm4sf1	0.111	0.536	1.544e-141	-2.34273
Rps12	1	0.978	2.17666e-141	0.681324
Xbp1	0.168	0.614	8.34178e-141	-0.640839
Tax1bp3	0.044	0.472	9.75689e-141	-1.08346
Camk1	0.015	0.414	3.06975e-140	-1.04083
Sdcbp	0.289	0.719	3.21938e-140	-1.30249
Eef1g	0.936	0.875	4.49692e-140	0.785817
Man1a	0.417	0.275	3.17503e-139	0.900127
Plin2	0.048	0.466	1.25107e-138	-1.55736
Smap2	0.381	0.171	3.731e-138	1.00006
Cyb5a	0.244	0.689	3.27076e-137	-1.21333
Saraf	0.13	0.579	1.60519e-136	-0.938901
March1	0.309	0.078	1.31728e-135	0.98331
Gas6	0.033	0.437	4.95775e-135	-1.47563
Mafb	0.02	0.414	4.97056e-135	-1.84331
Tyrobp	0.226	0.494	1.04426e-134	-2.80989
Ifngr1	0.266	0.711	3.2727e-134	-1.07423
Bst2	0.17	0.611	3.56681e-134	-1.40542
Gimap3	0.324	0.038	6.76881e-134	1.09789
Gltscr2	0.763	0.68	7.28973e-134	0.811731
Bgn	0.22	0.477	2.76113e-133	-2.74188
Rnase4	0.083	0.508	1.08534e-132	-1.58621
Capn2	0.044	0.455	1.36935e-131	-1.02523
Pea15a	0.068	0.492	1.65567e-131	-1.058
Col4a1	0.055	0.466	2.3073e-131	-1.57942
Abhd17b	0.341	0.138	3.30696e-131	0.943008
Klf2	0.945	0.787	3.55863e-131	1.30897
Fabp5	0.109	0.506	2.66342e-130	-2.29974
Fxyd5	0.354	0.729	5.34814e-130	-1.44572
Tubb2a	0.059	0.477	6.62025e-130	-1.18993
Mif4gd	0.407	0.239	1.43283e-129	0.893407
Tmem59	0.361	0.771	2.75814e-129	-0.998783
Prkcdbp	0.067	0.478	4.87573e-129	-1.58681
Plpp3	0.055	0.458	7.64789e-129	-1.67583
Egr1	0.142	0.566	1.05552e-128	-1.84582
Hspb1	0.111	0.517	1.06102e-128	-1.98567
Tmem243	0.441	0.211	3.17089e-128	1.01534
Bin1	0.411	0.271	4.61819e-128	0.859985
Litaf	0.089	0.513	4.76279e-128	-0.985033
Itgb5	0.027	0.415	7.77761e-128	-1.0493
Rsu1	0.132	0.569	3.51234e-127	-0.968051
Cmah	0.264	0.03	4.18923e-127	0.974606
S100a4	0.047	0.435	4.42765e-127	-2.14376
mt-Co1	1	0.996	5.21409e-127	0.5301
Gmfg	0.65	0.308	1.05666e-126	1.18376
Nfib	0.043	0.442	1.41639e-126	-1.35089
Tuba1a	0.413	0.719	3.62428e-126	-1.56604
Ptrf	0.061	0.465	1.04095e-125	-1.55517
Syk	0.365	0.148	5.37547e-124	0.974849
Fermt2	0.021	0.393	3.37786e-123	-1.2662
Slamf6	0.29	0.035	1.08279e-122	0.986049
Mrpl33	0.254	0.689	1.32141e-122	-0.9783
Lmo2	0.455	0.263	4.61221e-122	0.982806
Gstm1	0.166	0.549	8.56132e-122	-1.86829
Cd151	0.055	0.448	1.0988e-121	-1.20149
Klf9	0.033	0.415	1.38907e-121	-1.21173
Tmed10	0.316	0.749	1.87781e-121	-0.866147
Rac1	0.405	0.807	2.46105e-121	-0.842041
Eng	0.047	0.432	5.62126e-121	-1.5937
Pdia6	0.288	0.719	1.17001e-120	-0.987632
Dhrs3	0.027	0.398	1.58691e-120	-1.06379
Dab2	0.017	0.375	6.44148e-120	-1.4977
P4hb	0.113	0.536	8.30048e-120	-0.971285
Tgif1	0.368	0.248	1.72619e-119	0.852204
Tubb6	0.028	0.4	3.49539e-119	-1.05726
Dynll1	0.7	0.938	5.64233e-119	-0.867585
Sptbn1	0.192	0.591	6.17919e-119	-1.54465
Ap3s1	0.073	0.475	7.02311e-119	-0.872347
Nfic	0.068	0.467	9.55432e-119	-1.06377
Rpl29	0.976	0.965	2.43804e-118	0.659806
Nrm	0.292	0.099	3.58346e-118	0.937974
Pkig	0.499	0.384	5.56499e-118	0.791175
Ybx1	0.776	0.956	9.61972e-118	-0.868407
Ddah2	0.045	0.428	1.49083e-117	-1.29992
Adam15	0.032	0.403	4.53112e-117	-1.12618
4930523C07Rik	0.617	0.363	4.652e-117	1.0777
Timp3	0.063	0.436	8.46563e-117	-1.64299
Hhex	0.366	0.146	3.19987e-116	1.04557
Serpinb6a	0.091	0.492	3.28135e-116	-1.27551
Irf8	0.577	0.302	4.14339e-116	1.08127
Alox5ap	0.04	0.39	9.63056e-116	-2.17563
Rab1a	0.185	0.612	1.52438e-115	-0.89202
Dpysl2	0.093	0.501	2.21561e-115	-1.0642
Fn1	0.063	0.435	2.89189e-115	-2.12888
mt-Co2	1	0.992	3.57348e-115	0.52335
Grap	0.397	0.145	4.12132e-115	1.11829
Hexa	0.17	0.587	2.39109e-114	-1.12127
Nfe2l2	0.13	0.541	3.23298e-114	-0.937303
Atp5j	0.561	0.883	4.33756e-114	-0.804086
Rhoj	0.027	0.385	7.15665e-114	-1.28335
Dnajc9	0.32	0.134	8.78828e-114	0.860493
Traf3ip3	0.288	0.053	1.90785e-113	0.913675
Tgm2	0.023	0.376	2.19418e-113	-1.178
Tpm4	0.398	0.779	2.40146e-113	-1.00844
Ramp2	0.08	0.458	3.78105e-113	-1.58041
Shfm1	0.646	0.909	4.32115e-113	-0.86313
Smdt1	0.362	0.765	4.39348e-113	-0.874018
Rgs10	0.069	0.456	6.34676e-113	-1.24294
Cirbp	0.411	0.259	7.34028e-113	0.856245
Metrnl	0.029	0.388	8.16485e-113	-1.26448
Hsp90b1	0.373	0.778	1.21817e-112	-0.745588
Dusp3	0.077	0.465	2.05068e-112	-1.14633
Rbms1	0.253	0.673	7.91689e-112	-0.863781
Creg1	0.077	0.468	9.96378e-112	-1.0254
Rps17	0.999	0.986	1.48174e-111	0.589706
Slc25a4	0.262	0.672	1.92763e-111	-1.08996
Tnfsf12	0.012	0.346	3.33192e-111	-0.830725
S1pr4	0.273	0.038	3.75748e-111	0.972302
Pmp22	0.064	0.431	4.80689e-111	-1.61627
Slc43a3	0.035	0.393	7.60525e-111	-1.30786
Pxk	0.293	0.136	7.90716e-111	0.832576
Plpp1	0.025	0.375	1.7461e-110	-1.2636
Plekha2	0.3	0.191	1.83424e-110	0.734915
Cxcl16	0.025	0.374	3.24185e-110	-1.27046
Col3a1	0.26	0.47	4.69496e-110	-2.44978
Arf5	0.462	0.835	4.67443e-109	-0.724118
Uqcr11	0.356	0.757	7.10805e-109	-0.731242
Nupr1	0.067	0.44	1.05546e-108	-1.27059
Zeb2	0.125	0.528	1.05812e-108	-1.0962
H1f0	0.04	0.4	1.09362e-108	-1.13894
Ywhae	0.406	0.795	1.23375e-108	-0.822567
Rpl27-ps3	0.631	0.585	2.2614e-108	0.744789
Jun	0.406	0.781	2.81272e-108	-1.36155
Tceal8	0.016	0.346	7.29149e-108	-0.846799
Npdc1	0.019	0.354	1.37958e-107	-1.02842
Igfbp4	0.126	0.471	4.12367e-107	-2.0116
Asah1	0.115	0.511	7.1907e-107	-0.922931
Uqcrq	0.35	0.75	1.6752e-106	-0.710293
Rbm38	0.274	0.066	1.72043e-106	0.87353
Rpl31	1	0.982	2.89992e-106	0.594646
Smpdl3a	0.126	0.518	5.26852e-106	-1.09909
Rpl36-ps3	0.489	0.421	7.07052e-106	0.702057
Zcchc11	0.321	0.148	1.05359e-105	0.834368
Lgals3	0.115	0.413	1.37286e-105	-2.74993
Uqcrb	0.507	0.849	2.13042e-105	-0.756565
Ccl6	0.044	0.366	2.1639e-105	-3.02777
Cmtm3	0.028	0.368	2.83295e-105	-0.809055
Nedd4	0.056	0.42	4.46611e-105	-1.18977
Fam107b	0.377	0.128	9.74496e-105	0.979128
Zyx	0.077	0.449	1.01196e-104	-0.864051
Bri3	0.312	0.712	1.40492e-104	-0.839382
Tmed3	0.148	0.546	2.04439e-104	-1.0132
Fyb	0.016	0.341	4.07802e-104	-1.33554
Hspg2	0.057	0.419	6.33907e-104	-1.22478
Rpl6l	0.746	0.694	6.61946e-104	0.710826
Nap1l1	0.585	0.545	2.2712e-103	0.657859
Col4a2	0.045	0.398	2.30626e-103	-1.3179
Parp1	0.304	0.158	2.44702e-103	0.807395
Fcgr3	0.019	0.342	2.47943e-103	-1.77725
Morf4l2	0.158	0.553	3.87556e-103	-0.844795
Rps26-ps1	0.678	0.614	4.21667e-103	0.710368
Pmf1	0.257	0.086	5.49079e-103	0.780971
Ets1	0.609	0.288	1.14907e-102	1.08073
Arhgap15	0.356	0.119	1.34919e-102	0.962527
Prdx5	0.317	0.676	1.83051e-102	-1.14486
Col1a2	0.128	0.413	2.2445e-102	-2.48249
Ggh	0.043	0.386	2.41544e-102	-0.763002
Trim47	0.025	0.358	3.05327e-102	-0.918004
Eva1b	0.079	0.451	3.20666e-102	-1.06116
Nfia	0.021	0.349	3.27476e-102	-1.17399
Pls3	0.016	0.331	5.18909e-102	-1.03958
Rbm39	0.901	0.898	6.17508e-102	0.639256
Ccl9	0.024	0.34	6.55489e-102	-2.51873
Snrpg	0.715	0.74	8.22348e-102	0.590788
Acvrl1	0.029	0.362	1.5345e-101	-0.93783
Chmp2a	0.301	0.698	1.69799e-101	-0.744232
Cfh	0.063	0.407	1.98964e-101	-1.78607
Slc29a1	0.031	0.367	2.00539e-101	-0.917993
Cd180	0.261	0.079	2.08801e-101	0.820907
Ywhab	0.277	0.677	2.51931e-101	-0.725337
mt-Nd1	1	0.989	2.8492e-101	0.55978
Cltb	0.088	0.463	3.42057e-101	-0.958266
Nid1	0.052	0.394	6.4035e-101	-1.44053
Vars	0.28	0.117	7.49596e-101	0.778624
Mapk3	0.085	0.458	1.90476e-100	-0.924967
Hmox1	0.019	0.328	3.44737e-100	-2.30371
Gnb2l1	0.964	0.917	3.96423e-100	0.662388
Emilin1	0.015	0.327	4.40808e-100	-0.915377
Rab2a	0.314	0.706	4.57114e-100	-0.713192
Actg1	0.925	0.989	6.24809e-100	-0.937653
Socs3	0.091	0.458	6.60138e-100	-1.22783
Fstl1	0.065	0.391	1.04815e-99	-1.97375
Fth1	0.995	0.993	1.11944e-99	-1.05651
Rel	0.337	0.148	1.31775e-99	0.974135
Mfge8	0.06	0.412	1.5813e-99	-1.21383
Sh3bgrl	0.174	0.57	2.60413e-99	-0.825945
Cd68	0.029	0.342	2.71922e-99	-1.71529
Ltbp4	0.148	0.504	3.98253e-99	-1.45555
Nenf	0.148	0.531	4.45373e-99	-1.13563
Id2	0.064	0.412	4.97369e-99	-1.28337
Axl	0.043	0.38	8.56663e-99	-1.24883
Pcolce	0.099	0.424	1.20277e-98	-1.94973
Clk1	0.541	0.437	1.63701e-98	0.764044
Tmem14c	0.236	0.625	2.03308e-98	-0.755254
Wdr89	0.859	0.815	2.84755e-98	0.76328
Efhd2	0.087	0.445	4.02612e-98	-1.24492
Mgst1	0.049	0.393	4.42829e-98	-1.15045
Arpc1b	0.791	0.935	5.27221e-98	-0.905518
Tmed9	0.32	0.712	5.333e-98	-0.763071
B4galnt1	0.361	0.172	1.26123e-97	0.910805
Ppic	0.037	0.37	2.24518e-97	-1.12782
Ccdc80	0.107	0.414	2.70677e-97	-2.0852
Pam	0.048	0.385	4.51851e-97	-1.42986
Atp6v1g1	0.403	0.77	6.37189e-97	-0.690383
Rpl28	0.991	0.975	7.50996e-97	0.576507
Txndc17	0.257	0.652	8.22959e-97	-0.726835
Col1a1	0.064	0.372	9.85027e-97	-2.50154
Rps18-ps3	0.589	0.537	1.21621e-96	0.767539
Sept2	0.108	0.479	1.28118e-96	-0.813239
Gng5	0.64	0.905	1.43259e-96	-0.744872
Sash1	0.003	0.286	2.59171e-96	-0.739585
Tmed2	0.423	0.792	7.44398e-96	-0.707052
Map7d1	0.051	0.387	1.18522e-95	-0.769088
Sh3bp5	0.417	0.276	1.33044e-95	0.82166
Mmp14	0.007	0.298	1.46703e-95	-0.819847
Hspa5	0.485	0.809	2.17244e-95	-1.02703
Ctsc	0.366	0.399	5.2729e-95	-1.37697
Lilrb4a	0.015	0.313	7.78745e-95	-1.54727
Arf1	0.511	0.845	9.41314e-95	-0.692686
Ccnd1	0.028	0.345	1.02202e-94	-1.18347
Gm10076	0.75	0.706	1.29807e-94	0.714073
Ndufa8	0.206	0.589	1.31283e-94	-0.749953
Ssr2	0.193	0.568	1.8264e-94	-0.628639
Tm2d2	0.137	0.513	2.16342e-94	-0.753865
Cxcl12	0.059	0.365	2.4871e-94	-2.27046
Rpl23a-ps3	0.903	0.875	2.69984e-94	0.706571
Dnajc7	0.364	0.306	4.10673e-94	0.740054
Lamc1	0.045	0.377	4.32427e-94	-1.20464
Chmp4b	0.229	0.61	4.94862e-94	-0.760445
Nav1	0.025	0.337	1.03958e-93	-0.848162
Cd53	0.788	0.412	1.08272e-93	0.74517
Tspan3	0.041	0.371	1.13554e-93	-0.866482
Lgals3bp	0.039	0.363	1.70393e-93	-0.861818
Gda	0.015	0.313	2.13989e-93	-1.08146
Gm10116	0.156	0.507	4.06841e-93	-1.11457
Ly6c1	0.209	0.462	5.88488e-93	-2.2504
Ms4a6c	0.039	0.347	7.58681e-93	-1.85319
Snx2	0.565	0.398	1.03585e-92	0.844111
Hpcal1	0.048	0.38	1.30265e-92	-0.840433
Hspa1a	0.067	0.395	2.01338e-92	-1.89125
Olfml3	0.033	0.349	2.11937e-92	-1.13852
Tuba1b	0.486	0.807	2.31207e-92	-0.874651
Ms4a6d	0.012	0.301	2.31209e-92	-1.61337
Mxra7	0.019	0.312	2.45134e-92	-0.858616
Ccr2	0.011	0.298	7.5478e-92	-1.77721
Plod1	0.013	0.305	8.25561e-92	-0.785779
Reep3	0.071	0.414	8.50883e-92	-0.802864
Dusp1	0.45	0.772	1.85459e-91	-1.26997
Pgam1	0.226	0.6	2.29584e-91	-0.885882
Msrb1	0.121	0.46	2.41296e-91	-1.32394
Nfix	0.016	0.313	2.79954e-91	-0.933009
Socs2	0.035	0.354	2.92074e-91	-1.03544
Crip1	0.823	0.952	3.03239e-91	-1.11247
Luzp1	0.015	0.309	3.362e-91	-0.852704
Picalm	0.123	0.481	4.1174e-91	-0.806892
Tceb2	0.599	0.891	6.31374e-91	-0.65684
Gapdh	0.675	0.903	6.5297e-91	-0.909914
Fkbp9	0.019	0.317	6.7493e-91	-0.87256
Cygb	0.056	0.364	8.22643e-91	-1.77849
Sept7	0.305	0.676	9.46228e-91	-0.781422
Gnb1	0.305	0.675	1.00488e-90	-0.800173
Ifi204	0.003	0.273	1.13724e-90	-0.963147
Cytip	0.499	0.201	1.17037e-90	1.01685
Smim10l1	0.055	0.377	2.4218e-90	-0.778446
Dnajc3	0.144	0.502	2.65502e-90	-0.646671
Myeov2	0.304	0.683	3.39334e-90	-0.724075
Fbln2	0.081	0.399	3.45924e-90	-1.63938
Ralb	0.028	0.332	3.52708e-90	-0.782531
Ptov1	0.039	0.356	4.71722e-90	-0.765535
Ptp4a3	0.585	0.333	4.79125e-90	0.844254
Ctnna1	0.064	0.399	5.78566e-90	-0.88531
Itpripl2	0.012	0.296	6.62153e-90	-0.704022
Atp1a1	0.109	0.459	7.90147e-90	-0.858589
Vat1	0.028	0.327	8.2849e-90	-0.715657
Cnpy2	0.117	0.471	8.86105e-90	-0.718872
Clic4	0.093	0.437	9.67572e-90	-0.851874
Uqcr10	0.377	0.733	2.31074e-89	-0.565381
Serping1	0.15	0.398	3.4822e-89	-2.01396
Uqcc2	0.218	0.588	3.67906e-89	-0.749711
Use1	0.595	0.585	4.02135e-89	0.584772
Ndufb9	0.328	0.697	5.40792e-89	-0.622623
Cd83	0.405	0.179	1.11263e-88	1.16353
Rpn2	0.236	0.605	1.85458e-88	-0.69401
Gm6133	0.426	0.349	3.23283e-88	0.635822
Ilk	0.129	0.483	3.61431e-88	-0.690352
Fkbp2	0.152	0.493	4.44015e-88	-0.534527
Tmco1	0.198	0.561	6.16281e-88	-0.6108
Wbp5	0.152	0.514	7.38056e-88	-0.804963
Ifnar2	0.083	0.425	1.18036e-87	-0.775813
Thbs1	0.019	0.298	1.23989e-87	-1.68054
Pomp	0.36	0.722	1.96202e-87	-0.692817
C5ar1	0.013	0.291	2.4427e-87	-1.71374
Rpl13-ps3	0.526	0.519	2.83818e-87	0.579464
Lum	0.19	0.428	3.94277e-87	-2.04995
Psma7	0.459	0.803	4.81112e-87	-0.654852
Prdx2	0.293	0.667	5.24449e-87	-0.702431
Phlda3	0.025	0.323	5.64061e-87	-0.98327
Fcgrt	0.121	0.474	9.33842e-87	-0.912041
AF251705	0.011	0.286	1.10148e-86	-1.21322
Spcs1	0.333	0.695	1.33748e-86	-0.500492
Snx18	0.04	0.345	1.67941e-86	-0.716936
Lhfp	0.073	0.377	3.22659e-86	-1.56599
Yeats4	0.316	0.236	3.68948e-86	0.6301
Ddost	0.158	0.503	5.3408e-86	-0.565947
Htra3	0.141	0.399	5.48045e-86	-1.96688
Arl6ip5	0.229	0.585	7.79518e-86	-0.583266
Gpx3	0.156	0.416	8.69178e-86	-2.05477
Cox6c	0.667	0.915	8.97228e-86	-0.659268
Rpl13a-ps1	0.317	0.241	9.87322e-86	0.664081
Gusb	0.079	0.407	1.01086e-85	-0.783978
Sdpr	0.041	0.332	1.23711e-85	-2.18242
Il11ra1	0.031	0.331	1.39886e-85	-0.958608
Atp2b1	0.161	0.522	1.47825e-85	-0.827338
Rpl9-ps6	0.718	0.7	1.60996e-85	0.733787
Col15a1	0.043	0.344	1.68266e-85	-1.22413
Mrfap1	0.417	0.77	2.87104e-85	-0.63351
Tcf4	0.353	0.671	3.14458e-85	-1.10512
Rras	0.039	0.346	4.6578e-85	-0.821974
Snx3	0.389	0.738	5.77676e-85	-0.704173
Gpx4	0.558	0.854	7.52847e-85	-0.740333
Ywhah	0.342	0.704	7.72001e-85	-0.771714
Mxra8	0.029	0.327	8.28835e-85	-1.10959
Vcan	0.008	0.276	9.90734e-85	-0.880552
Dync1i2	0.226	0.586	1.42018e-84	-0.638138
1700025G04Rik	0.009	0.28	1.43701e-84	-0.731486
Ppp3ca	0.463	0.44	1.46589e-84	0.583326
Ddx5	0.944	0.928	1.63545e-84	0.625805
Tpi1	0.221	0.578	2.14099e-84	-0.879009
Cxx1a	0.024	0.311	2.59662e-84	-0.871418
Dpt	0.081	0.371	3.09154e-84	-1.74549
Col6a2	0.036	0.329	3.132e-84	-1.29959
Ndufc2	0.288	0.654	3.14709e-84	-0.645031
Dnaja1	0.477	0.8	3.49445e-84	-0.754542
Gnb2	0.587	0.871	4.5645e-84	-0.667118
Cd14	0.027	0.305	5.59571e-84	-1.82846
Ptpn6	0.533	0.269	7.69241e-84	0.96828
Klf4	0.256	0.615	8.4413e-84	-1.20286
Lrpap1	0.101	0.437	1.13165e-83	-0.690229
Usmg5	0.377	0.727	1.25162e-83	-0.598765
Cd93	0.035	0.333	1.77536e-83	-1.21487
Mbnl2	0.156	0.507	2.0328e-83	-0.680766
Mrpl52	0.366	0.723	2.61646e-83	-0.682764
Leprot	0.112	0.44	4.16175e-83	-0.632176
Gsr	0.013	0.285	4.2603e-83	-1.07025
Sept1	0.328	0.089	8.2268e-83	0.888952
Zfos1	0.569	0.486	8.46057e-83	0.703508
Igfbp6	0.065	0.367	1.21889e-82	-1.44916
Tmbim1	0.036	0.333	1.3106e-82	-0.70934
Phlda1	0.069	0.389	1.71188e-82	-1.11653
Ndufs5	0.306	0.661	1.89913e-82	-0.576145
Tppp3	0.057	0.367	2.09297e-82	-1.32137
Bicc1	0.009	0.273	2.115e-82	-0.91909
Rab3il1	0.011	0.276	2.45197e-82	-0.723346
Ccdc109b	0.016	0.291	2.80735e-82	-0.767359
Ppib	0.538	0.841	2.93765e-82	-0.731005
Lgmn	0.253	0.47	3.44097e-82	-1.81876
Mpeg1	0.017	0.294	3.56327e-82	-1.19331
Kdelr2	0.144	0.48	3.91908e-82	-0.768954
Pgls	0.499	0.51	4.19535e-82	0.505471
Mydgf	0.161	0.502	4.33531e-82	-0.621282
Sntb2	0.012	0.276	4.37806e-82	-0.67569
Sirpa	0.023	0.307	5.19677e-82	-0.869681
Gng12	0.029	0.317	5.75764e-82	-0.686155
Ctnnbip1	0.029	0.318	5.96716e-82	-0.992538
1110059E24Rik	0.274	0.194	9.15826e-82	0.614837
Cyfip1	0.056	0.36	2.06425e-81	-0.689733
Prdx4	0.084	0.394	2.3296e-81	-0.630104
Carhsp1	0.069	0.387	3.21304e-81	-0.755105
Gas1	0.04	0.325	3.72177e-81	-1.65286
Sgce	0.005	0.259	7.14201e-81	-0.734813
Ptpn18	0.715	0.421	8.79678e-81	0.837711
Oaf	0.036	0.321	9.0422e-81	-1.11241
Sdc2	0.037	0.33	1.16345e-80	-1.23913
Csf1r	0.021	0.297	2.31032e-80	-1.23091
Islr	0.013	0.277	2.72371e-80	-1.10672
Jup	0.04	0.333	2.9106e-80	-0.865886
Sh3bgrl3	0.947	0.868	3.30299e-80	0.569084
Gabarapl1	0.036	0.319	3.4553e-80	-0.685974
Meg3	0.032	0.304	3.49542e-80	-1.8139
Mtch1	0.237	0.582	3.51488e-80	-0.968081
Hsbp1	0.289	0.646	5.03339e-80	-0.611079
Ndufc1	0.264	0.617	5.20212e-80	-0.615267
Fxyd6	0.055	0.352	9.55725e-80	-1.23333
Tmbim6	0.518	0.826	1.16249e-79	-0.613695
Cpq	0.029	0.313	1.1639e-79	-0.911149
Ifi27	0.205	0.561	1.30644e-79	-0.88892
Nfkbid	0.274	0.097	1.38342e-79	0.829042
Cox7a2	0.537	0.845	1.47066e-79	-0.561887
Cryab	0.019	0.276	2.32278e-79	-0.875314
Ap2a2	0.105	0.422	2.78448e-79	-0.660013
Rheb	0.282	0.629	2.91886e-79	-0.572678
Fndc3b	0.013	0.277	3.46859e-79	-0.68043
Dpysl3	0.005	0.251	3.48501e-79	-0.727503
Vps29	0.162	0.5	3.5322e-79	-0.620194
Atp1b3	0.128	0.46	5.17809e-79	-0.704031
Id3	0.365	0.581	8.24206e-79	-1.43966
Esd	0.25	0.593	8.30038e-79	-0.665792
Cd36	0.113	0.383	8.5701e-79	-2.15182
Rab18	0.176	0.506	9.18391e-79	-0.545744
Entpd2	0.031	0.312	1.11923e-78	-1.18405
Slc9a3r2	0.065	0.356	1.6368e-78	-1.48048
Ndufb6	0.184	0.518	1.75954e-78	-0.563224
Ehd2	0.032	0.315	1.76914e-78	-0.95511
Ppp1r2	0.232	0.564	1.98432e-78	-0.809025
Mfap5	0.158	0.393	2.33739e-78	-1.97554
Eif3e	0.703	0.691	2.60206e-78	0.563154
Lman1	0.061	0.357	2.85768e-78	-0.632944
Gnai2	0.626	0.889	3.3846e-78	-0.592121
Grk6	0.301	0.143	3.76666e-78	0.74616
AI607873	0.011	0.266	3.80246e-78	-0.832972
H2afz	0.53	0.792	4.92097e-78	-0.875915
Spp1	0.045	0.322	5.08019e-78	-3.45875
Calr	0.526	0.828	5.47695e-78	-0.780157
Zbtb20	0.244	0.558	5.61506e-78	-1.30608
Rbp1	0.084	0.367	8.15294e-78	-1.56455
Aif1	0.02	0.282	8.35447e-78	-1.39695
Prkar1a	0.301	0.643	1.19326e-77	-0.547616
Vwa1	0.059	0.361	1.26691e-77	-1.01596
Thra	0.037	0.321	1.58144e-77	-0.748271
Col6a1	0.064	0.348	1.58487e-77	-1.3915
Plat	0.02	0.286	3.68494e-77	-0.886666
Bnip2	0.162	0.485	4.47433e-77	-0.575816
Ccm2	0.321	0.23	4.63853e-77	0.622919
Adamts5	0.027	0.295	1.02092e-76	-1.32786
Sh3glb1	0.446	0.774	1.08704e-76	-0.612794
Tnfaip2	0.008	0.255	1.1905e-76	-0.74158
Copz2	0.032	0.313	1.2553e-76	-0.79599
Clec3b	0.097	0.326	1.39647e-76	-2.11445
Id1	0.053	0.32	1.48696e-76	-1.53753
Mgll	0.044	0.311	1.60543e-76	-1.8516
Clec4a3	0.007	0.251	1.67085e-76	-1.06645
Arl1	0.19	0.535	1.68431e-76	-0.725631
H2B-EGFP	0.016	0.27	1.94442e-76	-1.03037
Mbnl1	0.582	0.546	2.17557e-76	0.573058
Fgfr1	0.012	0.266	2.22205e-76	-0.720333
Sgk1	0.068	0.367	2.47842e-76	-1.14176
1110008F13Rik	0.222	0.551	2.80736e-76	-0.551938
Gpm6b	0.033	0.306	3.72075e-76	-1.20016
Rhob	0.126	0.451	4.47914e-76	-0.730592
Lst1	0.077	0.358	4.54723e-76	-1.56427
Cav2	0.011	0.259	5.59796e-76	-1.23369
Raph1	0.019	0.281	6.65015e-76	-0.709111
Ninj1	0.076	0.379	6.99449e-76	-1.01919
Ndufv3	0.309	0.649	7.00484e-76	-0.546478
Rdx	0.206	0.547	1.08719e-75	-0.743733
Rps12-ps3	0.856	0.817	1.09107e-75	0.634979
Cyth3	0.027	0.295	1.53281e-75	-0.730205
Sept4	0.017	0.275	1.57727e-75	-1.21421
Rab11a	0.25	0.585	1.67268e-75	-0.65325
Sod3	0.021	0.287	2.37566e-75	-0.994291
Aprt	0.2	0.525	3.59357e-75	-0.929898
Igf1	0.016	0.273	3.7068e-75	-0.939825
Loxl1	0.073	0.357	4.00269e-75	-1.45882
Crispld2	0.045	0.321	4.14116e-75	-1.56956
Mmp2	0.059	0.341	4.75544e-75	-1.37037
Psmd7	0.189	0.51	5.05385e-75	-0.559859
Gpx1	0.594	0.812	5.35701e-75	-0.965092
Fkbp7	0.031	0.305	5.68309e-75	-0.788383
Serinc1	0.184	0.507	5.79787e-75	-0.556033
Ogn	0.065	0.332	6.2197e-75	-1.6617
Plxdc2	0.015	0.269	9.92245e-75	-0.824886
Camk2n1	0.024	0.291	1.01787e-74	-1.04139
S100a1	0.037	0.316	1.28734e-74	-0.764367
Cp	0.011	0.256	1.31527e-74	-0.957689
Rnf11	0.063	0.357	1.38316e-74	-0.673154
Ssr1	0.156	0.472	1.41398e-74	-0.543316
Medag	0.017	0.267	1.47885e-74	-0.877571
Rab6a	0.164	0.489	2.26471e-74	-0.631143
Aldoa	0.602	0.849	3.66996e-74	-0.768526
Eif4ebp1	0.14	0.468	4.2122e-74	-0.694382
Serpinf1	0.077	0.356	4.44777e-74	-1.52254
Ier3ip1	0.309	0.647	7.64058e-74	-0.535794
Rnh1	0.214	0.552	1.28129e-73	-0.758965
Rab7b	0.015	0.267	1.34689e-73	-0.70951
Vsir	0.056	0.35	1.59888e-73	-0.903577
2610001J05Rik	0.164	0.49	1.73706e-73	-0.598455
Klf7	0.099	0.41	2.49559e-73	-0.842046
Rpn1	0.13	0.447	2.58768e-73	-0.594804
Ostc	0.276	0.609	2.86948e-73	-0.524074
Glul	0.14	0.454	3.89258e-73	-0.747844
Spr	0.052	0.335	4.9049e-73	-0.624257
Fxyd1	0.053	0.336	6.41403e-73	-1.20766
Rcn3	0.069	0.358	8.30018e-73	-1.24772
Rnf149	0.044	0.323	8.63937e-73	-0.811575
Emilin2	0.011	0.251	8.84998e-73	-0.803271
Pi16	0.166	0.409	9.26093e-73	-1.87865
Ostf1	0.441	0.744	1.12093e-72	-0.632945
Ssr3	0.174	0.488	1.52449e-72	-0.503136
Atpif1	0.337	0.679	1.83244e-72	-0.686902
Canx	0.256	0.588	2.18286e-72	-0.531239
Tcn2	0.04	0.315	2.20461e-72	-0.686895
Scarb2	0.068	0.358	2.22637e-72	-0.612645
Ndufb8	0.336	0.671	2.40008e-72	-0.581933
Wfdc17	0.169	0.394	3.24223e-72	-2.16803
Leprotl1	0.064	0.345	3.28594e-72	-0.587176
Atp6ap2	0.129	0.431	3.59597e-72	-0.551655
Lama4	0.02	0.272	3.969e-72	-0.711539
P4ha1	0.051	0.33	5.27438e-72	-0.664251
Ankrd44	0.318	0.191	5.60248e-72	0.746891
Selk	0.53	0.829	6.71379e-72	-0.572742
Ndufa5	0.224	0.543	7.45148e-72	-0.532099
Lims2	0.039	0.305	7.50573e-72	-1.20973
Meox1	0.024	0.281	8.86019e-72	-1.11222
Oaz2	0.123	0.436	9.40635e-72	-0.83605
Emc7	0.186	0.506	1.17376e-71	-0.533704
Myadm	0.065	0.357	2.15119e-71	-0.717489
Ccl2	0.039	0.293	2.45288e-71	-2.56458
Dynlrb1	0.378	0.711	2.92645e-71	-0.595295
Cyb5r3	0.125	0.44	5.25171e-71	-0.803153
Mcfd2	0.061	0.347	5.82518e-71	-0.623927
Smoc2	0.093	0.345	6.50148e-71	-1.89157
Pttg1ip	0.108	0.403	7.71705e-71	-0.59385
Sec11c	0.395	0.41	8.18119e-71	0.567154
Tmem50a	0.459	0.775	8.67745e-71	-0.518428
Tspan4	0.021	0.276	9.68059e-71	-0.705824
Cyr61	0.025	0.271	1.15836e-70	-1.53248
Trf	0.035	0.298	1.25965e-70	-1.07138
Calm3	0.309	0.639	1.26035e-70	-0.580896
Il1b	0.047	0.299	1.32177e-70	-2.35192
Anxa4	0.039	0.303	1.3869e-70	-0.590817
Tmem109	0.083	0.372	1.49334e-70	-0.611687
Cndp2	0.075	0.371	1.52835e-70	-0.804198
Irf2	0.429	0.356	1.64319e-70	0.651479
Sat1	0.455	0.737	1.91433e-70	-0.856509
Cdc42ep2	0.021	0.273	2.60845e-70	-0.768653
C1qb	0.093	0.319	3.16803e-70	-2.8211
Tmem205	0.012	0.251	3.27787e-70	-0.610675
Ssbp4	0.075	0.368	5.93885e-70	-0.621762
Mlf2	0.186	0.505	6.07578e-70	-0.557184
Ptgis	0.036	0.3	6.44527e-70	-1.02517
Flot1	0.041	0.312	6.86601e-70	-0.636827
Rcn1	0.029	0.29	7.39057e-70	-0.714457
Ndufb2	0.21	0.531	1.6915e-69	-0.539419
Eif4a1	0.622	0.875	2.15375e-69	-0.668695
Ace	0.031	0.29	2.2033e-69	-0.865782
Rtn3	0.193	0.504	2.24594e-69	-0.557018
Gm42418	0.324	0.622	2.31706e-69	-0.901183
Klc1	0.041	0.297	2.9368e-69	-0.550882
Capza2	0.418	0.718	5.40541e-69	-0.633821
Atf3	0.076	0.353	6.04583e-69	-1.32705
Cxcl2	0.052	0.284	6.47639e-69	-2.72643
Vmp1	0.105	0.403	6.72588e-69	-0.628819
Ugp2	0.125	0.434	6.78612e-69	-0.744249
Ap1s2	0.06	0.337	7.41467e-69	-0.632002
Aspn	0.033	0.283	7.93762e-69	-1.55031
Gpx8	0.023	0.274	8.56241e-69	-0.770265
Dap	0.157	0.476	1.01651e-68	-0.743957
Abca8a	0.032	0.29	1.06526e-68	-1.05949
Cav1	0.083	0.326	1.18255e-68	-1.88742
Mdfic	0.032	0.291	1.43899e-68	-0.64219
Rab7	0.31	0.636	1.54648e-68	-0.536357
Sqstm1	0.17	0.479	1.62237e-68	-0.576436
Prelp	0.055	0.32	2.75898e-68	-1.1606
mt-Nd2	0.972	0.946	3.01294e-68	0.544993
Evl	0.364	0.219	3.24934e-68	0.718172
G0s2	0.079	0.321	3.24976e-68	-1.30913
Ms4a6b	0.049	0.315	3.37666e-68	-1.18548
Txndc15	0.079	0.354	3.44495e-68	-0.520641
Manf	0.33	0.666	3.64582e-68	-0.530807
Cnih4	0.125	0.429	4.05012e-68	-0.629251
Rarres2	0.104	0.376	5.88649e-68	-1.44975
Chmp3	0.134	0.428	6.08014e-68	-0.528509
Bag1	0.242	0.569	8.17908e-68	-0.557408
Pcolce2	0.032	0.284	8.33033e-68	-1.20708
Plin3	0.059	0.329	8.63111e-68	-0.564298
Pltp	0.037	0.298	1.05915e-67	-0.929144
Clec4a2	0.017	0.255	2.25229e-67	-1.02913
Slfn5	0.031	0.281	2.32558e-67	-0.821001
Sdc3	0.032	0.289	2.39937e-67	-0.672985
Arf4	0.332	0.649	2.60835e-67	-0.663682
Mettl9	0.069	0.348	3.06429e-67	-0.591533
Fbln1	0.085	0.324	3.46687e-67	-1.50817
Prnp	0.035	0.291	3.77399e-67	-0.796493
Mgat2	0.152	0.457	4.01748e-67	-0.528612
Drap1	0.17	0.486	4.1324e-67	-0.624684
Selenbp1	0.021	0.266	4.3946e-67	-0.852625
Rasa3	0.261	0.187	5.18654e-67	0.531591
Htra1	0.02	0.261	5.68079e-67	-0.848842
Amotl1	0.016	0.253	5.85981e-67	-0.683002
Qk	0.097	0.387	9.29218e-67	-0.605682
Calu	0.105	0.407	1.50327e-66	-0.744954
Grina	0.067	0.336	1.62866e-66	-0.576567
Ap2m1	0.28	0.6	1.70511e-66	-0.578083
Tmem123	0.437	0.356	1.88277e-66	0.635254
Jam2	0.021	0.258	2.45451e-66	-0.93861
Ctnnb1	0.154	0.464	2.60702e-66	-0.716087
Higd1a	0.206	0.512	2.73402e-66	-0.525776
Pmepa1	0.023	0.267	4.08654e-66	-0.768311
Tnfaip1	0.041	0.304	4.23358e-66	-0.808429
Lima1	0.019	0.252	4.47137e-66	-0.612214
Golim4	0.023	0.261	4.55498e-66	-0.607218
Rab5c	0.248	0.571	4.64187e-66	-0.605742
Fbln5	0.032	0.281	5.04665e-66	-1.02709
Nucb1	0.1	0.379	5.12653e-66	-0.503374
Serf2	0.901	0.967	5.71755e-66	-0.550912
Ece1	0.023	0.266	1.05327e-65	-0.726803
Ski	0.043	0.3	1.18724e-65	-0.579158
Ms4a4c	0.438	0.185	1.70503e-65	0.779624
Tcp11l2	0.316	0.191	1.89488e-65	0.682656
Chchd2	0.766	0.943	2.40282e-65	-0.525672
Thbd	0.044	0.301	2.84501e-65	-0.896769
Coro1c	0.069	0.332	3.33122e-65	-0.535127
Fhl1	0.021	0.261	3.61574e-65	-0.802131
Eef1b2	0.855	0.814	4.62201e-65	0.540512
Pnp	0.128	0.422	4.89977e-65	-0.602869
Mef2a	0.109	0.404	5.58866e-65	-0.701021
Pf4	0.06	0.297	5.98348e-65	-2.58706
Col8a1	0.045	0.286	6.31406e-65	-1.47903
Sp100	0.473	0.352	7.08756e-65	0.70538
Ube2e3	0.104	0.38	7.38559e-65	-0.510173
Tmem176b	0.061	0.325	9.8025e-65	-1.23977
Gpihbp1	0.123	0.319	1.14063e-64	-1.96914
Rnpep	0.065	0.342	1.20401e-64	-0.685049
Ctsz	0.471	0.74	1.30333e-64	-0.72875
Aebp1	0.023	0.26	1.35958e-64	-0.856563
Znhit1	0.093	0.377	1.60268e-64	-0.579074
Angptl2	0.02	0.255	1.73751e-64	-0.804664
Rasgrp2	0.434	0.196	2.4393e-64	0.842583
Atp5j2	0.613	0.871	4.05585e-64	-0.504721
Tsen34	0.125	0.408	4.09156e-64	-0.508272
Tpm1	0.116	0.405	4.23767e-64	-0.820675
Rer1	0.3	0.615	4.54852e-64	-0.506307
Stx12	0.071	0.344	5.25378e-64	-0.614787
Bax	0.308	0.616	6.50798e-64	-0.613477
Camk2d	0.438	0.369	7.31109e-64	0.601673
Actn4	0.128	0.415	7.47112e-64	-0.640372
Wls	0.045	0.294	9.61244e-64	-0.536816
Slc6a6	0.133	0.407	1.20245e-63	-1.00539
Cd72	0.333	0.12	1.97684e-63	0.678129
Card19	0.12	0.408	2.03741e-63	-0.74559
Dhrs7	0.084	0.355	2.23507e-63	-0.571564
Slc39a1	0.064	0.333	3.31553e-63	-0.861
Elovl1	0.113	0.402	3.47483e-63	-0.574825
Serpine2	0.059	0.317	4.19377e-63	-1.19466
Hdlbp	0.103	0.383	4.29163e-63	-0.563999
Birc3	0.254	0.143	4.43966e-63	0.640019
Vkorc1	0.112	0.403	4.65194e-63	-0.699437
Morf4l1	0.61	0.871	7.46844e-63	-0.518107
Mrpl17	0.162	0.455	9.17227e-63	-0.516502
Snx5	0.562	0.435	1.15678e-62	0.723136
Stk24	0.32	0.257	1.8517e-62	0.534702
Pdlim1	0.112	0.389	1.98989e-62	-0.819559
Nptn	0.061	0.315	2.06199e-62	-0.510888
Zfp36l1	0.64	0.608	3.87767e-62	0.585064
Ndel1	0.123	0.413	6.13543e-62	-0.608824
Swi5	0.375	0.681	6.37088e-62	-0.517324
Lamtor1	0.222	0.524	9.73983e-62	-0.504302
Sec62	0.422	0.721	1.20828e-61	-0.549229
Tspan31	0.088	0.355	1.32449e-61	-0.506626
Smchd1	0.348	0.27	1.44191e-61	0.576859
Fbn1	0.053	0.311	1.62521e-61	-1.07725
Sdf2l1	0.101	0.383	2.96915e-61	-0.69002
Mvp	0.089	0.353	5.62229e-61	-0.530541
Idh1	0.025	0.252	7.20418e-61	-0.521045
Esam	0.047	0.269	1.29772e-60	-1.5322
Arl4c	0.033	0.275	1.40977e-60	-0.747683
Eln	0.043	0.277	1.47696e-60	-1.5307
Emb	0.024	0.252	1.74404e-60	-0.927474
Map1lc3a	0.142	0.426	2.19752e-60	-0.638201
Tmem140	0.028	0.262	2.70232e-60	-0.711484
Gm10073	0.826	0.781	2.77233e-60	0.567282
Pxdc1	0.321	0.213	3.66572e-60	0.657963
Akap12	0.04	0.28	4.95731e-60	-0.738262
Adamts2	0.028	0.253	6.77129e-60	-0.742987
Cfp	0.025	0.254	1.11169e-59	-1.10878
Csrp1	0.12	0.402	1.2686e-59	-0.755742
Ctsa	0.192	0.488	1.38367e-59	-0.82722
Lipa	0.059	0.307	1.46768e-59	-0.560118
Lamb1	0.036	0.273	1.76874e-59	-0.748411
Prelid1	0.334	0.638	2.37655e-59	-0.566029
PISD	0.318	0.27	4.50603e-59	0.567167
Dock2	0.288	0.141	4.57559e-59	0.696864
mt-Nd3	0.815	0.786	1.05842e-58	0.518559
C1qa	0.069	0.281	1.15442e-58	-2.69951
Calm1	0.889	0.964	1.88405e-58	-0.646209
Arhgap31	0.093	0.347	3.54647e-58	-0.922648
Gabarap	0.672	0.88	4.86235e-58	-0.608562
Smco4	0.045	0.288	7.35579e-58	-0.852042
Pdlim7	0.045	0.28	8.15848e-58	-0.530062
Pnrc1	0.686	0.673	9.69745e-58	0.536115
Ptp4a1	0.161	0.441	1.23654e-57	-0.522104
Rcsd1	0.401	0.246	1.53355e-57	0.709727
Dok3	0.298	0.154	1.59233e-57	0.697081
Pyhin1	0.318	0.124	1.7124e-57	0.800155
Sipa1	0.369	0.308	1.83744e-57	0.543898
Sec14l1	0.049	0.287	1.99623e-57	-0.545514
Trim12a	0.32	0.196	5.4295e-57	0.658623
Ikbkb	0.36	0.297	5.45536e-57	0.543525
Fam105a	0.039	0.274	1.09173e-56	-0.820412
Add3	0.349	0.292	1.74201e-56	0.563081
Snrk	0.073	0.331	2.06976e-56	-0.782961
Hes1	0.121	0.393	3.32468e-56	-0.916668
Tnxb	0.029	0.255	5.01524e-56	-0.856617
Coro1b	0.168	0.453	5.63649e-56	-0.545642
Sod1	0.117	0.388	1.23266e-55	-0.568225
Rpl22l1	0.908	0.843	1.27751e-55	0.548229
Glud1	0.194	0.478	1.33913e-55	-0.503463
Gna11	0.075	0.325	1.41085e-55	-0.619791
Snap23	0.113	0.381	1.67689e-55	-0.542231
Mrpl27	0.067	0.312	2.46297e-55	-0.504264
Gnas	0.815	0.919	2.98794e-55	-0.671415
Ptprc	0.562	0.323	3.63706e-55	0.713587
Cdh5	0.041	0.251	3.69669e-55	-1.42968
Rbpj	0.059	0.301	5.0745e-55	-0.563291
Rap2b	0.04	0.268	6.66107e-55	-0.615659
Acp5	0.297	0.124	8.01752e-55	0.711791
Atf5	0.049	0.281	8.11963e-55	-0.92543
Tcf3	0.284	0.217	9.88612e-55	0.56616
Sepw1	0.575	0.819	1.32691e-54	-0.557688
Gimap4	0.459	0.21	1.34796e-54	0.650706
Egfl7	0.076	0.279	2.71459e-54	-1.6148
Cltc	0.178	0.453	2.98152e-54	-0.500438
C1qc	0.068	0.269	4.16749e-54	-2.33381
Zfand5	0.236	0.517	4.54078e-54	-0.510854
Elk3	0.08	0.333	4.71336e-54	-0.721366
Rtp4	0.048	0.281	7.66771e-54	-0.810805
Npm1	0.844	0.82	7.73694e-54	0.541468
Cnn2	0.551	0.496	8.64041e-54	0.547577
S100a8	0.194	0.356	2.03867e-53	-2.61829
Sub1	0.819	0.778	2.38323e-53	0.534247
Mxd4	0.18	0.454	2.74318e-53	-0.591024
Ehd1	0.165	0.44	2.77608e-53	-0.644907
Il6st	0.036	0.254	4.98886e-53	-0.548001
Slc48a1	0.092	0.336	5.10566e-53	-0.522299
S100a10	0.731	0.869	6.88433e-53	-0.717903
Por	0.061	0.297	8.00234e-53	-0.607446
Otulin	0.269	0.201	8.18783e-53	0.520934
Fam111a	0.358	0.306	1.10753e-52	0.551403
Tln1	0.278	0.561	2.01202e-52	-0.511299
Lasp1	0.1	0.354	2.02783e-52	-0.526009
Dpep1	0.087	0.295	2.96507e-52	-1.47007
Actb	0.996	0.998	3.23659e-52	-0.939335
Tspan13	0.373	0.379	3.4148e-52	-0.707008
Dusp6	0.04	0.263	4.99392e-52	-0.669111
AW112010	0.224	0.433	9.2016e-52	-1.06944
Fyn	0.056	0.283	4.53505e-51	-0.550196
Snhg18	0.049	0.279	5.10952e-51	-0.781331
Cdc42se2	0.361	0.281	5.23542e-51	0.541839
Ly6a	0.546	0.602	7.8216e-51	-1.00889
Gpcpd1	0.276	0.18	2.33605e-50	0.594015
Pcsk6	0.047	0.263	2.38049e-50	-0.850956
Arhgap25	0.252	0.119	5.87249e-50	0.629767
Kdelr3	0.036	0.251	1.09593e-49	-0.644576
Arpc4	0.349	0.619	1.42664e-49	-0.512113
Tpst2	0.119	0.369	1.80546e-49	-0.549515
Cebpb	0.052	0.274	4.76598e-49	-0.691766
Hspa8	0.925	0.978	5.72007e-49	-0.63772
Aqp1	0.081	0.257	6.08685e-49	-1.9332
Gm26699	0.273	0.206	6.84337e-49	0.501561
Lrrc8a	0.048	0.26	1.88395e-48	-0.645164
Cfl2	0.083	0.317	1.25625e-47	-0.520363
Neat1	0.439	0.696	2.17714e-47	-0.579445
Nbeal1	0.06	0.28	3.18812e-47	-0.530857
Samhd1	0.487	0.358	3.24706e-47	0.609104
Aldh2	0.39	0.641	1.70118e-46	-0.583747
Ubc	0.823	0.935	2.03076e-46	-0.583849
Fez2	0.057	0.273	1.02318e-45	-0.557242
Ccser2	0.068	0.283	2.48365e-45	-0.520661
Pdlim2	0.152	0.371	3.17753e-45	-0.646275
Cd44	0.083	0.301	3.37618e-45	-0.814821
Fosb	0.208	0.46	4.20059e-45	-0.728452
Ier5	0.712	0.608	4.22768e-45	0.600273
Nfkbiz	0.06	0.275	5.29688e-45	-0.617313
Sept11	0.107	0.344	8.67082e-45	-0.523712
Ifi27l2a	0.636	0.732	1.8276e-44	-1.01304
Hmgn1	0.601	0.497	7.19845e-44	0.580557
Lbh	0.313	0.246	9.05591e-44	0.509594
Adgre5	0.354	0.312	2.16484e-43	0.538049
Smad7	0.309	0.221	2.31225e-43	0.583463
Uap1	0.103	0.329	3.78178e-43	-0.569361
Gimap5	0.281	0.096	3.8528e-43	0.635087
Csrp2	0.073	0.273	8.38164e-43	-0.82095
AB124611	0.382	0.234	9.49685e-43	0.641115
Inpp5d	0.288	0.172	2.43109e-42	0.598024
Ehd4	0.096	0.32	7.1122e-42	-0.635816
Pitpna	0.28	0.525	1.3542e-41	-0.540344
Rgcc	0.1	0.307	5.28717e-41	-1.20771
Eno1	0.422	0.644	1.13813e-40	-0.555395
Hist1h2bc	0.129	0.347	2.85845e-40	-0.702606
Mndal	0.477	0.359	8.93617e-40	0.503669
Emp3	0.522	0.736	1.34545e-39	-0.659846
S100a9	0.144	0.265	1.97192e-39	-2.22256
Neurl3	0.252	0.166	2.5507e-39	0.519139
Tsc22d1	0.136	0.355	2.62467e-39	-0.682488
Pde4b	0.253	0.186	3.76162e-39	0.505168
Gm2a	0.341	0.515	3.99393e-38	-0.633248
Rapgef6	0.262	0.17	7.42531e-38	0.50096
Nck1	0.128	0.339	1.03193e-37	-0.572731
Ly86	0.477	0.264	1.19404e-37	0.540111
Ccnd2	0.123	0.347	2.35132e-37	-0.610697
Vamp5	0.071	0.265	8.25248e-37	-0.510858
Lyl1	0.253	0.12	9.45694e-37	0.570827
Bcl2	0.346	0.245	1.77348e-36	0.570996
Fos	0.766	0.841	3.63055e-36	-0.895476
Cyth1	0.265	0.169	1.20141e-35	0.512957
Arhgap30	0.33	0.22	1.30272e-34	0.535795
Heg1	0.121	0.324	2.08054e-33	-0.542091
Fli1	0.386	0.295	4.4488e-33	0.541901
Gngt2	0.266	0.461	8.39452e-33	-0.771275
Icam2	0.269	0.27	2.91308e-30	-0.543748
Itgb2	0.133	0.3	3.20575e-26	-0.662438
Cd200	0.209	0.289	6.83987e-26	-0.681432
Cyp4f18	0.3	0.176	5.0199e-24	0.55103
Tpd52	0.226	0.365	8.27542e-22	-0.636301
Fcgr2b	0.173	0.285	6.32234e-20	-0.614598

## Sheet: M2MФ vs rest
Gene	pct.1	pct.2	p_val_adj	Log2FoldChange
C1qa	0.926	0.235	0	3.20655
C1qb	0.945	0.272	0	3.07782
Ms4a7	0.938	0.184	0	3.0766
Apoe	0.997	0.867	0	3.05952
C1qc	0.942	0.221	0	2.99615
Fcrls	0.71	0.089	0	2.40597
Cd72	0.816	0.095	0	2.28982
Trem2	0.924	0.182	0	2.21179
Cxcl16	0.964	0.322	0	2.07115
Hexb	0.967	0.456	0	2.04417
Ctss	1	0.444	0	2.00588
Ly86	0.969	0.239	0	1.86681
Gm10116	0.969	0.462	0	1.85388
Rgs10	0.978	0.405	0	1.84954
Adgre1	0.902	0.168	0	1.81911
Ctsh	0.996	0.415	0	1.72832
Cx3cr1	0.852	0.11	0	1.71324
Aif1	0.954	0.231	0	1.7003
AF251705	0.969	0.233	0	1.67533
C3ar1	0.901	0.176	0	1.6279
Slamf9	0.729	0.073	0	1.62473
Lgmn	0.99	0.429	0	1.60337
Unc93b1	0.982	0.381	0	1.58795
Csf1r	0.969	0.245	0	1.58761
Fcer1g	1	0.443	0	1.54166
Lyz2	1	0.64	0	1.52046
Clec12a	0.847	0.147	0	1.51986
Tyrobp	1	0.451	0	1.49509
Cybb	0.942	0.229	0	1.37035
Hpgds	0.671	0.051	0	1.2634
Sparc	0.536	0.665	0	-3.4763
Igfbp7	0.705	0.715	0	-3.5528
Ctsc	0.994	0.365	6.12355608570309e-314	1.43303
Gsn	0.887	0.805	2.66543487597935e-309	-4.0226
Lair1	0.79	0.129	1.07992e-307	1.10577
Fcgr3	0.976	0.289	7.50305e-306	1.40584
Mpeg1	0.936	0.243	1.53043e-304	1.47197
Pld4	0.932	0.238	2.90203e-302	1.402
Laptm5	0.997	0.396	4.21956e-302	1.41955
Alox5ap	0.97	0.339	1.40465e-300	0.752262
Mgp	0.742	0.629	4.21433e-300	-3.39986
Tmsb4x	1	1	4.05781e-299	0.878472
P2ry6	0.856	0.183	4.41606e-296	1.07359
Spi1	0.975	0.308	1.20429e-289	1.16731
Bcl2a1b	0.856	0.195	2.70388e-288	1.81587
Ms4a6c	0.948	0.297	5.45267e-286	0.948942
Ms4a6d	0.889	0.253	2.57636e-285	0.837411
Tmem176b	0.883	0.279	4.96277e-283	1.89083
Dcn	0.561	0.618	4.08007e-281	-4.48145
Fcgr1	0.831	0.201	7.41719e-278	0.922788
Evi2a	0.867	0.205	3.11682e-276	1.07006
Npc2	0.999	0.796	1.93744e-273	1.22313
Fth1	1	0.993	1.62224e-271	1.14317
Pou2f2	0.778	0.157	1.33053e-268	1.03808
Fyb	0.944	0.29	1.28151e-267	1.32474
Lst1	0.957	0.309	3.69607e-267	1.22416
Arrb2	0.844	0.195	6.66734e-267	1.00757
Cd68	0.945	0.292	1.03046e-266	1.22487
Cd14	0.904	0.256	2.97864e-266	1.08071
Tuba1a	0.578	0.708	7.11915e-266	-2.05717
Rgs2	0.953	0.315	1.36504e-265	1.49747
Tmsb10	0.92	0.94	9.97122e-265	-1.57068
Cyth4	0.852	0.21	1.00997e-264	0.968646
Cd53	0.988	0.403	3.38333e-264	0.656377
C5ar1	0.813	0.247	8.96022e-263	0.518411
Lpcat2	0.707	0.112	5.10898e-260	1.02588
Ftl1	1	0.994	1.80521e-258	1.21234
Clec4a3	0.84	0.206	3.59678e-254	1.13121
Fcgr2b	0.887	0.247	5.90049e-253	1.14171
Tpd52	0.945	0.326	1.27516e-252	0.911302
Wfdc17	0.969	0.35	8.8802e-252	1.1553
Cd52	0.997	0.498	5.4373e-250	0.905886
Cyba	0.997	0.825	5.76665e-249	0.972843
Lrrc25	0.761	0.169	8.96475e-248	0.86196
Apobec1	0.788	0.169	7.1243e-247	1.06377
Tmem176a	0.801	0.195	7.65137e-246	1.62246
Cd48	0.873	0.251	8.45337e-246	0.922804
Tnfaip8l2	0.812	0.196	3.24563e-245	0.95929
Gatm	0.582	0.067	4.22749e-243	1.03997
Selplg	0.833	0.242	4.7492e-243	0.716511
Ptprc	0.89	0.307	6.35116e-243	0.60629
Ptpn6	0.856	0.254	4.21461e-241	0.806562
Fam105a	0.852	0.229	4.90732e-241	1.00355
Rpl10-ps3	0.984	0.729	4.05508e-239	1.20692
Ppfia4	0.559	0.059	1.61581e-238	0.920527
Ccl6	0.741	0.327	2.74535e-237	-1.10227
Serpinh1	0.187	0.585	5.49946e-237	-2.71725
Pirb	0.757	0.202	2.74885e-236	0.652361
Tm6sf1	0.876	0.264	8.24707e-233	0.891908
Rac2	0.926	0.373	2.71934e-230	0.510367
Hexa	0.976	0.542	2.7915e-230	1.27164
Sh3bgrl3	0.999	0.866	5.87258e-230	0.895114
Ptpn18	0.975	0.409	1.11387e-229	1.08208
Lgals3	0.963	0.366	1.22688e-229	1.17843
Susd3	0.681	0.133	1.96107e-229	0.819414
Ucp2	0.964	0.393	9.63183e-229	1.21686
Rgs1	0.726	0.149	1.05013e-227	1.90119
Ntpcr	0.744	0.164	1.77751e-227	1.16869
Fcgr4	0.676	0.121	2.24053e-227	1.06989
Lcp1	0.956	0.361	2.72824e-226	0.930084
Sirpa	0.873	0.26	7.82369e-226	1.06219
Col3a1	0.468	0.457	3.73525e-223	-2.57358
Ncf1	0.68	0.156	1.50897e-221	0.66942
Gm9843	0.999	0.845	1.55403e-221	0.992979
Clec4a2	0.79	0.212	4.1622e-221	0.916934
Ncf2	0.779	0.234	2.13233e-220	0.626163
Bgn	0.295	0.471	6.27054e-219	-3.10604
Ehd4	0.879	0.277	2.75481e-216	1.02865
Fkbp1a	0.778	0.787	1.19394e-215	-1.26056
Tmem37	0.6	0.095	1.78695e-215	0.869639
Rassf4	0.704	0.159	3.93924e-215	0.792836
Hcls1	0.843	0.278	6.94995e-215	0.693883
Fermt3	0.683	0.173	7.67176e-214	0.602518
Ms4a6b	0.837	0.271	1.7284e-213	0.75755
Abhd12	0.807	0.22	2.73412e-212	1.0524
Myo1f	0.664	0.155	3.38322e-212	0.632458
Lacc1	0.519	0.059	1.21296e-211	0.759676
Lat2	0.739	0.189	2.02039e-210	0.795933
Coro1a	0.972	0.432	3.12043e-210	0.654654
H2-DMb1	0.72	0.157	4.78515e-210	1.36711
S100a11	0.87	0.892	1.63102e-209	-1.31436
Ccl3	0.668	0.137	2.70985e-209	2.04057
Gmfg	0.834	0.3	1.0099e-208	0.527294
Ccl4	0.714	0.175	1.90285e-208	2.40783
Trf	0.84	0.254	1.04552e-207	1.22945
Ncf4	0.753	0.212	1.77791e-207	0.699179
Cotl1	0.988	0.507	3.14968e-207	0.904707
Clec4a1	0.742	0.185	1.89378e-206	0.970787
Tmem86a	0.653	0.126	5.02922e-206	0.834007
Cd300a	0.67	0.156	6.62737e-206	0.728579
Crip2	0.173	0.578	2.88571e-205	-2.33334
Efhd2	0.947	0.397	7.65e-205	0.977418
Nckap1l	0.607	0.11	1.27228e-204	0.729999
Gpr34	0.384	0.02	1.80568e-204	0.785401
Hck	0.676	0.162	6.50548e-202	0.699332
Pltp	0.821	0.255	1.80884e-200	1.2799
H2-DMa	0.834	0.255	2.55458e-200	1.27525
Irf5	0.75	0.225	3.14594e-200	0.607942
AB124611	0.75	0.215	4.83684e-200	0.708484
Grn	0.976	0.606	8.12705e-200	1.22623
Fam49b	0.938	0.387	1.05793e-199	0.715074
Neurl3	0.655	0.145	1.83099e-199	0.745519
Vsir	0.879	0.304	2.481e-199	0.832411
Ctsb	0.999	0.802	8.33189e-199	1.41573
Psap	1	0.883	1.31391e-198	1.0211
Tbxas1	0.529	0.087	1.89169e-197	0.616528
Gpr65	0.634	0.132	4.62216e-196	0.824651
Ifi30	0.926	0.364	1.38049e-194	1.06375
Zbtb20	0.302	0.553	5.3164e-193	-1.8227
Irf8	0.852	0.289	1.65977e-192	0.836412
Arhgap30	0.689	0.202	2.22476e-192	0.545181
Dok3	0.607	0.139	3.42623e-192	0.590229
Cd84	0.673	0.168	2.10852e-191	0.71851
Slc11a1	0.649	0.173	3.65178e-191	0.581505
Col1a2	0.29	0.402	3.89067e-191	-2.51296
Cebpa	0.689	0.155	1.08349e-190	0.898297
Gng2	0.661	0.161	1.87868e-190	0.662552
Nenf	0.619	0.504	2.41107e-190	-0.70294
Cd34	0.116	0.537	7.25516e-190	-2.38441
Arl11	0.511	0.073	1.38809e-188	0.688089
Pla2g7	0.686	0.19	7.5159e-188	0.669767
Snx5	0.921	0.416	1.11937e-187	1.09997
H2-Aa	0.818	0.347	3.48611e-186	2.40654
Gstm1	0.372	0.536	9.85434e-186	-1.96286
Ccr5	0.639	0.145	3.65501e-185	0.79799
Ctsa	0.954	0.446	6.63914e-185	1.02421
Sptbn1	0.255	0.585	8.04282e-184	-1.86917
Arl4c	0.766	0.235	2.75505e-183	0.729855
H2-Eb1	0.763	0.296	2.8841e-183	2.52577
Mafb	0.911	0.364	4.51716e-183	0.913558
Sepp1	0.982	0.77	9.56773e-183	1.41413
Pla2g15	0.559	0.094	1.99212e-182	0.727611
H2-Ab1	0.828	0.403	1.6816e-181	2.32217
Pycard	0.87	0.347	1.91225e-181	0.599589
Glipr1	0.647	0.141	2.54058e-181	0.959875
Tmem106a	0.707	0.185	4.85527e-181	0.788459
Plekho1	0.707	0.223	9.82934e-181	0.522638
Mtch1	0.556	0.563	2.43715e-180	-0.955941
Man2b1	0.807	0.259	3.82671e-178	0.973587
Lum	0.212	0.425	9.82429e-178	-2.57266
Vav1	0.578	0.13	1.35199e-177	0.578218
Tgfbi	0.948	0.426	2.29882e-177	0.96004
B2m	1	0.992	1.36237e-175	0.803511
Cd81	0.782	0.721	4.21778e-174	-1.34158
Atp13a2	0.599	0.129	4.75854e-174	0.671307
Fgd2	0.437	0.067	5.09674e-174	0.50423
Ramp1	0.567	0.115	3.1015e-173	0.682971
Cd86	0.61	0.146	1.74479e-172	0.67803
Sparcl1	0.166	0.546	4.29852e-170	-2.43737
Fabp4	0.784	0.682	6.63237e-170	-3.25563
Dpep2	0.554	0.117	1.81184e-169	0.66279
Sec62	0.77	0.7	6.82484e-169	-0.754157
Epsti1	0.63	0.161	3.08175e-168	0.6683
Cd74	0.85	0.431	9.55126e-166	2.03056
Syngr1	0.41	0.042	7.69182e-165	0.87099
Erp29	0.969	0.602	5.02763e-164	0.941512
Cd300ld	0.535	0.12	2.4742e-162	0.567069
Milr1	0.564	0.13	8.12671e-162	0.590277
Cyb5a	0.693	0.662	1.74405e-161	-0.911105
Gpx1	0.999	0.789	2.61936e-161	0.813786
Tcf4	0.616	0.655	4.59671e-161	-1.27416
Slamf7	0.396	0.044	1.11509e-160	0.630395
Hacd4	0.64	0.171	1.1257e-160	0.676304
Blnk	0.499	0.098	2.5087e-160	0.582208
Cyp4f18	0.619	0.16	5.40912e-160	0.733839
Sh2d1b1	0.351	0.031	1.04949e-158	0.550115
Ltbp4	0.154	0.501	1.94719e-158	-1.83216
S100a10	0.796	0.865	1.6119e-156	-1.17432
Laptm4a	0.933	0.797	3.81046e-156	-0.725876
Clec4n	0.587	0.156	2.97204e-155	0.599484
S100a16	0.12	0.508	1.12692e-152	-1.77674
Clta	0.991	0.795	3.54136e-152	0.796263
Atf3	0.806	0.312	7.30444e-152	1.38205
Tep1	0.52	0.112	8.35459e-152	0.568466
Lmo2	0.735	0.249	2.40132e-150	0.660594
Inpp5d	0.578	0.157	7.31613e-150	0.53692
Tnfaip8	0.809	0.325	8.68013e-150	0.570492
Gusb	0.868	0.362	2.07794e-149	0.835935
Prkcdbp	0.092	0.474	2.37743e-149	-1.73669
Stab1	0.61	0.174	6.35745e-149	0.619965
Ifitm3	0.95	0.916	3.16603e-146	-0.922839
Hpgd	0.39	0.053	1.16364e-145	0.697975
Tgfbr1	0.676	0.195	2.62779e-145	0.822444
Selm	0.184	0.495	7.54021e-145	-1.56652
Dab2	0.821	0.33	8.7086e-145	0.744262
Basp1	0.621	0.179	1.04145e-144	0.616688
Lhfp	0.111	0.373	1.15337e-144	-1.72165
Prkcd	0.736	0.26	2.71499e-144	0.603476
Tlr2	0.606	0.153	6.35883e-144	0.812986
Kctd12	0.733	0.249	7.3027e-144	0.736937
Mfap5	0.204	0.389	1.97811e-143	-2.29893
Gsto1	0.596	0.156	1.12168e-141	0.627987
S100a6	0.841	0.843	1.60169e-141	-1.32671
Rab3il1	0.711	0.238	1.73034e-140	0.653882
Cst3	1	0.952	2.96524e-140	0.627011
Dstn	0.772	0.661	3.31033e-140	-0.635763
Klf2	0.631	0.805	4.44098e-140	-1.92521
Igfbp4	0.403	0.454	1.85416e-137	-1.62647
Htra3	0.199	0.395	3.53318e-137	-2.21841
Syngr2	0.837	0.363	9.80896e-136	0.57717
Cald1	0.096	0.467	3.57368e-135	-1.71157
Ccrl2	0.55	0.13	1.37676e-134	1.10956
Ctsz	0.988	0.711	1.4579e-134	0.849772
Pcolce	0.139	0.419	1.53998e-134	-2.13464
Ccdc80	0.074	0.413	3.2337e-134	-2.44859
Malat1	1	0.998	1.02169e-133	-1.0237
Ifngr2	0.836	0.369	1.02789e-132	0.564895
Dnaja1	0.729	0.784	1.12578e-132	-1.04832
Ebf1	0.086	0.505	1.83232e-132	-1.96602
Anxa2	0.804	0.792	2.4803e-131	-0.959542
Gng11	0.268	0.539	3.44237e-131	-2.32228
Id3	0.367	0.579	3.85224e-131	-2.01336
Tm4sf1	0.207	0.528	1.35077e-130	-2.42179
Mrc1	0.462	0.108	5.13444e-130	0.549267
Gpsm3	0.856	0.386	2.60897e-129	0.64422
Gltp	0.876	0.412	8.91091e-129	0.772511
Cd83	0.604	0.17	2.67816e-128	1.12992
Krtcap2	0.813	0.732	3.23895e-128	-0.585322
Ptrf	0.077	0.462	3.38913e-128	-1.70852
Creg1	0.88	0.423	1.62291e-127	0.829158
Arl1	0.554	0.513	1.91896e-127	-0.575123
Crip1	0.951	0.944	4.35861e-127	-1.24835
Itgb5	0.84	0.369	5.31533e-127	0.699533
Metrnl	0.806	0.345	1.07026e-125	0.650039
Fxyd5	0.988	0.693	3.35462e-125	0.719437
Rps9	1	0.991	3.86289e-125	0.525331
Serping1	0.102	0.4	8.16325e-125	-2.43877
Sept7	0.652	0.655	1.26293e-124	-0.800701
Wdr89	0.993	0.808	1.69627e-124	0.598465
Hfe	0.613	0.195	2.97069e-124	0.561762
Rbp1	0.139	0.363	5.86148e-124	-1.72352
Gm10036	0.855	0.402	6.25755e-124	0.551203
App	0.785	0.701	1.88348e-123	-0.688932
Gpx3	0.224	0.411	2.79535e-123	-2.30362
Daglb	0.556	0.149	2.83446e-123	0.59044
Ppp1r2	0.48	0.548	3.19619e-123	-0.941662
Ramp2	0.096	0.455	3.52025e-123	-1.76137
Ly6c1	0.274	0.457	4.66859e-123	-2.66141
Dpt	0.095	0.368	5.18258e-123	-1.97326
Col1a1	0.161	0.365	5.9175e-123	-2.49567
Hspb1	0.156	0.512	1.15052e-122	-2.08716
Bsg	0.85	0.752	1.22137e-122	-0.609016
Gm10250	0.677	0.249	7.99751e-122	0.510035
Pid1	0.876	0.436	1.24785e-120	0.518496
Ctsd	0.959	0.731	1.9992e-120	1.3444
Nfib	0.077	0.438	2.50833e-120	-1.41937
Slc25a4	0.708	0.645	3.0593e-120	-0.659558
Rpl7a-ps5	0.818	0.359	5.39987e-120	0.661089
Jund	0.895	0.806	2.1776e-119	-0.976211
Il10rb	0.844	0.402	9.95314e-119	0.52979
P2rx4	0.73	0.275	1.36176e-118	0.758271
Bmyc	0.658	0.226	1.60714e-118	0.582505
Fbln2	0.077	0.397	2.28594e-118	-1.87361
Ahnak	0.634	0.67	7.01623e-118	-0.890559
Ifitm2	0.964	0.882	1.14455e-117	-0.651095
Abca1	0.523	0.134	1.76302e-117	0.627846
Sdcbp	0.976	0.68	1.99587e-116	0.669432
Sat1	0.993	0.707	6.44333e-116	0.767903
Pdlim2	0.271	0.363	1.4299e-115	-0.910652
H2afz	0.993	0.766	2.55658e-115	0.604099
S100a13	0.778	0.693	3.2168e-115	-0.620192
Ly6a	0.424	0.609	6.38208e-115	-2.1845
Gm11808	0.984	0.686	1.41302e-114	0.66373
Plin2	0.855	0.421	2.53218e-114	0.573784
Rarres2	0.064	0.376	3.05791e-114	-1.86272
Ddah2	0.119	0.422	3.7022e-114	-1.2931
Itgb1	0.69	0.625	5.04316e-114	-0.672183
Rcn3	0.104	0.355	1.26931e-113	-1.40875
Tpm4	0.778	0.757	1.12257e-112	-0.848487
Rhog	0.836	0.403	1.34814e-112	0.513238
Hmgb1	0.936	0.87	1.60265e-112	-0.685473
Camk1	0.815	0.369	2.71926e-112	0.692206
Plpp3	0.104	0.453	3.67374e-112	-1.71848
Dpysl2	0.559	0.474	5.80456e-111	-0.509079
Dpm3	0.624	0.568	6.17115e-111	-0.533568
Actr3	0.981	0.692	6.89444e-111	0.649029
Ccr2	0.696	0.26	2.22166e-110	1.14968
Aplp2	0.544	0.547	2.55344e-110	-0.880258
Col4a1	0.129	0.459	5.10637e-110	-1.57633
Rpl9-ps6	0.985	0.686	9.64974e-110	0.63974
Rhoj	0.05	0.381	1.13969e-109	-1.30886
Zmynd15	0.295	0.032	3.78425e-109	0.555586
Rasgef1b	0.373	0.067	4.67082e-109	0.513055
Cyb5r3	0.452	0.421	2.02595e-108	-0.617357
Nedd4	0.073	0.417	7.40125e-108	-1.28861
Rab7b	0.647	0.232	1.64251e-107	0.612538
Vamp8	0.945	0.567	4.46723e-107	0.604016
Fstl1	0.107	0.387	5.10238e-107	-2.04369
Loxl1	0.081	0.354	5.70699e-107	-1.6643
Serpinf1	0.156	0.35	1.2666e-106	-1.58475
Rhoc	0.39	0.523	1.99728e-106	-1.19324
Pi16	0.116	0.41	2.71873e-106	-2.4135
Cygb	0.043	0.363	5.19811e-106	-1.95695
Calu	0.19	0.401	1.6215e-105	-0.912139
Cltb	0.351	0.447	3.3789e-105	-0.791542
Nfkbiz	0.655	0.242	4.12132e-105	0.861345
Myl12a	0.954	0.918	5.48384e-104	-0.729906
Nid1	0.07	0.391	6.13442e-104	-1.5262
Cmtm7	0.865	0.448	1.38188e-103	0.534472
Rps18-ps3	0.917	0.52	1.47433e-103	0.519799
Txndc5	0.329	0.401	3.27636e-103	-0.753496
Ogn	0.086	0.329	4.5399e-103	-1.78718
Timp3	0.102	0.432	5.50582e-103	-1.71971
Ywhaq	0.735	0.666	1.70264e-102	-0.546766
Xbp1	0.624	0.587	2.76559e-102	-0.616863
Morf4l2	0.508	0.532	6.11083e-102	-0.632697
Tubb4b	0.367	0.508	1.24798e-101	-1.08397
Cfh	0.262	0.394	1.61185e-101	-1.55087
Zeb2	0.892	0.485	2.35313e-101	0.582439
Eif4a2	0.721	0.634	8.97835e-101	-0.510384
Asah1	0.88	0.468	9.11065e-101	0.580172
Sar1a	0.446	0.466	1.49669e-100	-0.569518
Atp6v0b	0.969	0.647	3.04003e-100	0.619351
Cnn3	0.092	0.393	4.78213e-100	-1.12687
Drap1	0.481	0.468	1.01823e-99	-0.561523
Rbms1	0.714	0.646	1.99021e-99	-0.537104
Col6a1	0.071	0.345	1.32327e-98	-1.55039
Rdx	0.513	0.528	1.90738e-97	-0.706064
Sdc2	0.03	0.329	2.51985e-97	-1.38562
Mmp2	0.076	0.338	1.73418e-96	-1.50635
Nfia	0.058	0.345	2.16813e-96	-1.17676
Tspan13	0.341	0.381	3.14267e-96	-1.38121
Nrp1	0.637	0.546	7.51365e-96	-0.894723
Oaz2	0.384	0.42	1.69396e-95	-0.730847
Fxyd1	0.03	0.335	3.62427e-95	-1.39948
Hspg2	0.098	0.415	3.76929e-95	-1.2598
Pam	0.145	0.378	6.77099e-95	-1.41138
Tbrg1	0.344	0.422	9.6526e-95	-0.689308
Fermt2	0.053	0.389	1.06676e-94	-1.24981
Ppic	0.079	0.366	1.10952e-94	-1.18643
Lamtor1	0.883	0.487	1.19346e-94	0.525582
Eng	0.224	0.42	1.82767e-94	-1.43949
Slc43a3	0.086	0.388	2.68333e-94	-1.30272
Gm10073	0.994	0.772	4.31379e-94	0.52319
Rpl27-ps3	0.933	0.57	5.14612e-94	0.572038
Ckb	0.879	0.482	7.61268e-94	0.665412
Hmgn1	0.496	0.503	8.02649e-94	-0.665725
Tnf	0.327	0.055	1.71966e-93	0.584539
Npdc1	0.044	0.351	5.14691e-93	-1.04154
Plpp1	0.056	0.372	7.46186e-93	-1.30083
Col6a2	0.041	0.327	1.53499e-92	-1.38356
Smoc2	0.07	0.344	2.1557e-92	-2.21594
Klf9	0.114	0.408	2.51119e-92	-1.16329
Csrp1	0.344	0.388	9.31825e-92	-0.718895
Plbd1	0.523	0.188	1.28169e-91	0.500555
Eva1b	0.341	0.434	2.87768e-91	-0.801883
Igfbp6	0.139	0.361	5.91563e-91	-1.54068
Lamc1	0.087	0.372	4.67133e-90	-1.26116
Mxra8	0.044	0.324	3.01105e-89	-1.17818
Ctnnbip1	0.351	0.299	3.54303e-89	-0.547129
Clec3b	0.031	0.328	3.56114e-89	-2.48043
Ctnnb1	0.44	0.447	2.34654e-88	-0.668217
Emp1	0.409	0.497	5.45993e-88	-1.02508
Slc50a1	0.366	0.398	6.03267e-88	-0.599957
Ctnna1	0.4	0.379	8.53363e-88	-0.554078
Fxyd6	0.062	0.35	2.03238e-87	-1.37665
Kif5b	0.6	0.583	8.81656e-87	-0.563363
Atox1	0.985	0.818	1.21019e-86	0.593214
Gas1	0.025	0.324	1.49418e-86	-1.77587
Cited2	0.664	0.278	1.72181e-86	0.756536
Icam2	0.16	0.276	7.89872e-86	-1.32306
Prelp	0.039	0.32	4.17786e-85	-1.35194
Pmp22	0.301	0.416	1.0341e-84	-1.18184
Egfl7	0.116	0.275	1.15076e-84	-1.75494
Cd151	0.354	0.43	1.36259e-84	-0.820189
Ugp2	0.43	0.416	1.38984e-84	-0.565501
Socs2	0.052	0.351	1.49491e-84	-1.10479
Gpm6b	0.027	0.305	2.77277e-84	-1.31626
Ptp4a3	0.234	0.353	4.60748e-84	-0.957228
Acp5	0.418	0.118	1.11836e-83	0.631388
Nupr1	0.409	0.419	1.1208e-83	-0.79921
Col4a2	0.142	0.391	1.72453e-83	-1.27463
Meg3	0.053	0.301	2.91326e-83	-1.87709
Kdelr2	0.436	0.463	3.47327e-83	-0.624682
Akr1a1	0.981	0.758	3.55111e-83	0.632587
Entpd2	0.027	0.31	7.71187e-83	-1.32454
Cd36	0.273	0.373	1.34506e-82	-1.9942
Ifi27	0.542	0.541	1.98696e-82	-0.657337
Ppp1cb	0.425	0.436	3.05363e-82	-0.509077
Fbln1	0.053	0.324	3.06713e-82	-1.80379
Ptgis	0.037	0.299	3.29499e-82	-1.15414
Adamts5	0.024	0.293	4.56906e-82	-1.44202
Zfp36	0.913	0.568	4.72504e-82	0.735281
Wbp5	0.52	0.492	9.15545e-82	-0.547124
Itm2b	1	0.979	9.61898e-82	0.699632
Col15a1	0.092	0.339	1.008e-81	-1.27412
Dusp3	0.44	0.444	1.63155e-81	-0.7175
Ccl12	0.41	0.107	2.24798e-81	1.0169
Cav1	0.169	0.32	3.392e-81	-1.8907
Blvrb	0.736	0.356	1.20057e-80	0.558821
Mxra7	0.036	0.309	1.30697e-80	-0.902369
Tmem119	0.471	0.158	1.35018e-80	0.771555
Mfge8	0.138	0.406	4.04208e-80	-1.23408
Fus	0.754	0.715	8.38599e-80	-0.577393
Crispld2	0.04	0.319	1.48884e-79	-1.70021
Ctsl	0.846	0.741	1.49414e-79	-0.567685
Emilin1	0.213	0.314	1.65582e-79	-0.671745
Vwa1	0.126	0.355	2.41931e-79	-1.07862
Csrp2	0.182	0.266	3.18905e-79	-0.863643
Oaf	0.065	0.318	6.98888e-79	-1.18997
Gnas	0.987	0.909	9.39924e-79	-0.554242
Sdpr	0.117	0.326	2.5117e-78	-2.11745
Aspn	0.076	0.28	2.97711e-78	-1.59557
Fkbp9	0.058	0.313	4.46801e-78	-0.866482
Esam	0.086	0.265	2.20004e-77	-1.59842
Mat2a	0.618	0.592	2.23436e-77	-0.60416
Slc9a3r2	0.093	0.353	2.45888e-77	-1.61107
Fbn1	0.087	0.308	8.7661e-77	-1.21544
Ecm1	0.52	0.461	5.02095e-76	-0.591072
Dync1i2	0.593	0.565	5.47134e-76	-0.50802
mt-Nd2	0.991	0.945	1.34763e-75	-0.599766
Map1lc3a	0.412	0.41	1.73901e-75	-0.526059
Serpine2	0.052	0.315	2.35592e-75	-1.38463
Gm17056	0.33	0.073	3.96663e-75	0.503158
Arhgap31	0.292	0.334	4.2099e-75	-0.861807
Ehd2	0.046	0.313	5.40696e-75	-1.02823
Meox1	0.073	0.277	8.21549e-75	-1.10001
Snhg18	0.025	0.279	9.32278e-75	-0.968205
Tmod3	0.375	0.399	9.73596e-75	-0.592629
Pcolce2	0.019	0.283	1.41152e-74	-1.30899
Ccnd3	0.338	0.449	1.43534e-74	-0.725859
Ppdpf	0.41	0.447	1.73371e-74	-0.561365
Rnf11	0.261	0.344	1.93703e-74	-0.571906
Jup	0.099	0.329	2.1409e-74	-0.923911
Sod3	0.031	0.285	4.33458e-74	-1.04531
Pls3	0.062	0.326	4.76442e-74	-1.00914
Col8a1	0.087	0.282	1.02889e-73	-1.5282
Nck1	0.228	0.333	1.37833e-73	-0.771865
Uba52	0.619	0.549	1.64019e-73	-0.505249
Pdlim1	0.176	0.384	1.94189e-73	-0.996892
H2B-EGFP	0.016	0.268	2.06215e-73	-1.09469
Camk2n1	0.039	0.288	2.07304e-73	-1.10459
Islr	0.021	0.275	2.51758e-73	-1.13457
Lipa	0.627	0.276	1.00283e-72	0.502182
Il11ra1	0.243	0.318	1.22973e-72	-0.694076
Dpep1	0.041	0.297	2.8706e-72	-1.78428
Tpm1	0.305	0.393	4.95171e-72	-0.804112
Ace	0.031	0.288	6.50252e-72	-0.966854
Klf3	0.406	0.452	6.55972e-72	-0.621053
Rtcb	0.677	0.321	2.6965e-71	0.521053
Elk3	0.339	0.318	6.03835e-71	-0.504078
4930523C07Rik	0.164	0.389	8.54794e-71	-1.02623
Abca8a	0.03	0.288	1.35805e-70	-1.14631
Gimap6	0.121	0.301	1.70454e-70	-1.28643
Carhsp1	0.351	0.37	2.20449e-70	-0.503488
Ier5	0.919	0.597	2.78212e-70	0.505212
Bicc1	0.022	0.271	3.8249e-70	-0.92164
mt-Nd3	0.833	0.785	3.90833e-70	-0.520951
Acvrl1	0.327	0.344	1.43137e-69	-0.547618
Uap1	0.244	0.32	3.29834e-69	-0.640755
Tsc22d3	0.521	0.539	8.12956e-69	-0.717833
Fhl1	0.024	0.26	1.61988e-68	-0.849457
Rcn1	0.053	0.287	2.35823e-68	-0.768663
Cxcl12	0.127	0.359	4.0321e-68	-2.17702
Cyr61	0.044	0.268	8.18772e-68	-1.58121
Atpif1	0.939	0.645	8.19734e-68	0.504085
Lamp1	0.99	0.83	9.70788e-68	0.546364
Ier3	0.772	0.419	1.46036e-67	0.717039
Lims2	0.064	0.302	1.5393e-67	-1.2845
Gdi2	0.967	0.74	1.89714e-67	0.545503
Plat	0.033	0.284	2.01865e-67	-0.912134
Akap12	0.031	0.279	6.74667e-67	-0.875259
Cd200	0.071	0.296	1.42329e-66	-1.45533
Mast4	0.031	0.293	2.19915e-66	-0.877261
Gpihbp1	0.194	0.314	2.20371e-66	-1.98732
Fkbp7	0.062	0.302	3.11988e-66	-0.831451
Fbln5	0.058	0.278	3.36543e-66	-1.06792
Tagln2	0.858	0.821	5.11916e-66	-0.605739
Selenbp1	0.144	0.258	6.76599e-66	-0.730446
Snrk	0.246	0.32	7.3555e-66	-0.689537
Tnxb	0.024	0.254	8.81847e-66	-0.97121
Id1	0.117	0.315	1.05523e-65	-1.55765
Sgce	0.019	0.257	1.89834e-65	-0.720184
Medag	0.031	0.265	4.14917e-65	-0.916695
Dynll1	0.964	0.922	5.00684e-65	-0.512725
Il1b	0.604	0.268	7.02093e-65	0.721389
Tspan3	0.319	0.354	9.62844e-65	-0.511929
Heg1	0.061	0.326	1.36159e-64	-0.928391
Pcsk6	0.033	0.262	1.55904e-64	-1.01519
Nav1	0.24	0.324	3.01885e-64	-0.588894
Htra1	0.025	0.259	3.18155e-64	-0.887231
Gadd45b	0.596	0.262	3.51454e-64	0.711275
Mgll	0.095	0.307	8.66277e-64	-1.87505
Fgfr1	0.031	0.263	1.02175e-63	-0.7294
Klf4	0.647	0.592	1.23019e-63	-0.808668
Pecam1	0.102	0.271	1.59641e-63	-1.29669
Rpl22l1	0.917	0.842	1.66271e-63	-0.507372
Rras	0.225	0.334	2.55609e-63	-0.624105
G0s2	0.073	0.32	4.13307e-63	-1.51504
Gpx8	0.036	0.271	1.38017e-62	-0.804714
Cdc42ep2	0.047	0.27	2.65445e-62	-0.789249
Ehd1	0.31	0.431	3.33563e-62	-0.790516
Atf5	0.073	0.278	3.38382e-62	-1.0305
Nfix	0.127	0.305	4.43654e-62	-0.778749
Zeb1	0.037	0.276	5.68096e-62	-0.767158
Rgcc	0.179	0.301	9.95713e-62	-1.36767
Cpq	0.249	0.3	1.48547e-61	-0.609413
Cbx3	0.342	0.429	3.0656e-61	-0.651947
Sept4	0.047	0.272	5.5257e-61	-1.19439
Adamts2	0.027	0.251	1.77723e-60	-0.850416
Phlda3	0.09	0.318	1.95697e-60	-0.925427
Add3	0.135	0.303	3.34188e-60	-0.669001
Aebp1	0.031	0.259	4.20188e-60	-0.908546
Ets1	0.132	0.316	8.67076e-60	-1.01885
Thbd	0.113	0.296	1.20302e-59	-0.907828
Hmox1	0.51	0.3	1.2147e-59	-0.527494
Copz2	0.105	0.308	2.33168e-58	-0.748552
Tsc22d1	0.181	0.351	4.88158e-58	-0.953285
Smco4	0.095	0.284	6.19807e-58	-0.894549
Hsp90ab1	0.985	0.966	6.22596e-58	-0.559252
Lamb1	0.047	0.271	6.53393e-58	-0.843866
Gna11	0.129	0.321	8.13903e-58	-0.738024
Cxcl2	0.564	0.255	8.59829e-58	0.52011
Gm42418	0.656	0.603	3.15157e-57	-0.663212
Socs3	0.742	0.421	3.18053e-57	0.52693
Amotl1	0.025	0.251	8.42146e-57	-0.701484
Cyth3	0.132	0.288	1.47962e-56	-0.649263
Tgm2	0.351	0.356	3.35358e-56	-0.612464
Amd1	0.247	0.272	4.5844e-56	-0.502461
Cfl2	0.218	0.309	5.7342e-56	-0.530266
Ece1	0.062	0.262	6.14258e-56	-0.734441
Hes1	0.141	0.39	1.12349e-55	-1.19959
Lrrc8a	0.135	0.254	1.14962e-55	-0.673706
Vcan	0.039	0.272	1.84728e-55	-0.835349
Nfe2l1	0.2	0.284	3.93659e-55	-0.501901
Lama4	0.043	0.269	7.6327e-55	-0.739389
Klf7	0.258	0.4	1.43162e-54	-0.782354
Hspa5	0.855	0.787	6.64167e-53	-0.53626
Ccser2	0.101	0.28	7.10241e-53	-0.672116
Jam2	0.046	0.255	8.54558e-53	-0.956744
Fos	0.978	0.829	1.00434e-52	0.530285
Cp	0.034	0.253	1.08686e-52	-0.918378
Lpl	0.394	0.496	1.43537e-52	-1.07881
Prnp	0.081	0.287	1.51802e-52	-0.822137
Cxx1a	0.161	0.302	2.34744e-52	-0.722772
Tppp3	0.209	0.357	3.72467e-52	-1.13437
Sept11	0.193	0.338	3.86659e-52	-0.659257
Gda	0.265	0.298	7.10188e-52	-0.632913
Sh3bp5	0.175	0.289	8.21906e-52	-0.583705
Vamp5	0.123	0.261	8.6877e-52	-0.64473
Mgst1	0.313	0.377	9.82805e-52	-0.740732
Tpst1	0.194	0.32	9.62408e-50	-0.617368
Ablim1	0.07	0.279	1.05131e-49	-0.806541
Eln	0.093	0.273	2.67197e-49	-1.52802
Ccl2	0.441	0.27	3.92011e-49	-0.757857
Tnfaip1	0.179	0.295	5.22855e-49	-0.666362
Thra	0.138	0.314	5.50386e-49	-0.693186
Cryab	0.076	0.271	7.47262e-49	-0.829251
Angptl2	0.061	0.252	1.47779e-48	-0.803167
Jun	0.876	0.754	1.53957e-48	-0.645419
Triobp	0.194	0.273	2.04421e-48	-0.506949
Myadm	0.273	0.344	2.07845e-48	-0.536099
Mprip	0.13	0.253	1.21254e-47	-0.524884
Rhob	0.387	0.435	2.23749e-47	-0.625218
Aqp1	0.114	0.254	3.26292e-47	-1.98242
Kcnq1ot1	0.264	0.321	3.82458e-42	-0.520753
Igf1	0.502	0.245	2.43139e-41	0.713352
Golim4	0.095	0.255	2.61124e-41	-0.559156
Gsr	0.239	0.271	1.19456e-40	-0.645584
Fyn	0.159	0.276	4.59097e-40	-0.521703
Glipr2	0.105	0.266	2.61941e-37	-0.571782
Fn1	0.52	0.409	3.06067e-36	-0.636646
Ccnd2	0.181	0.343	3.08362e-35	-0.861949
Ier2	0.818	0.756	2.45634e-33	-0.500795
Serpinb6a	0.434	0.471	3.1191e-33	-0.504044
Gas6	0.319	0.42	1.18504e-32	-0.773305
Plxdc2	0.139	0.261	9.01161e-32	-0.608992
S100a8	0.264	0.351	4.99643e-30	-2.55957
Thbs1	0.265	0.283	5.07511e-29	-0.937889
Ly6e	0.917	0.905	4.37867e-25	-0.565846
S100a9	0.225	0.26	3.09854e-24	-2.18802
Egr1	0.551	0.541	1.72663e-23	-0.574195
Hspa1a	0.302	0.38	1.23731e-22	-1.10868
Plac8	0.206	0.275	1.315e-17	-1.2398
Ccl7	0.265	0.234	6.68083e-09	-0.822049

## Sheet: M1Mo vs rest
Gene	pct.1	pct.2	p_val_adj	Log2FoldChange
Plac8	0.977	0.238	0	3.26205
Chil3	0.889	0.2	0	3.24829
Hp	0.958	0.098	0	3.15857
Lyz2	1	0.642	0	2.78231
Ifitm6	0.9	0.073	0	2.68578
Ly6c2	0.824	0.115	0	2.45597
Msrb1	0.964	0.416	0	2.26831
Gsr	0.892	0.24	0	2.19682
S100a4	0.975	0.386	0	2.10055
Alox5ap	0.99	0.341	0	2.04835
Tyrobp	1	0.454	0	1.95938
Wfdc17	0.99	0.352	0	1.90383
Lgals3	0.992	0.368	0	1.85629
Prdx5	0.975	0.64	0	1.68851
Fcer1g	1	0.446	0	1.66882
Cd52	1	0.501	0	1.54487
Ctss	0.997	0.447	0	1.23612
Taldo1	0.941	0.616	4.98323184677495e-313	1.51536
Mcemp1	0.673	0.063	3.46867895516478e-311	1.76638
Sirpb1c	0.845	0.185	3.37855e-302	1.95651
Ifitm3	1	0.913	6.04554e-299	1.21806
Ms4a6c	0.953	0.3	4.00231e-296	1.88721
Napsa	0.832	0.184	1.42944e-286	1.8418
Ccl6	0.958	0.319	6.44293e-277	1.25903
Emb	0.814	0.211	2.54953e-276	1.79407
Tpd52	0.92	0.331	4.10522e-271	1.71045
Coro1a	0.971	0.435	1.43544e-261	1.61821
Fxyd5	0.987	0.694	9.44839e-261	1.39397
Ccr2	0.904	0.252	3.76604e-258	1.76657
Gm9733	0.515	0.035	5.2981e-254	1.57774
Ptpn1	0.837	0.398	3.53121e-248	1.58675
Cd44	0.812	0.264	3.83534e-246	1.73054
Psap	0.992	0.884	8.05294e-245	1.10582
Actg1	0.998	0.985	9.56265e-245	1.19188
Cd81	0.176	0.75	1.72993e-242	-3.01328
Cyba	0.993	0.826	8.7286e-241	1.09498
Ccl9	0.915	0.293	7.02879e-239	1.47725
Slpi	0.611	0.078	7.96208e-231	1.86691
Mmp8	0.482	0.034	1.05975e-229	1.48507
F10	0.587	0.068	9.44814e-228	1.65756
Ms4a4c	0.76	0.173	3.70431e-227	1.68439
Arhgdib	0.956	0.579	3.90135e-225	1.36915
F13a1	0.771	0.171	1.49817e-224	1.67028
Ncf2	0.781	0.236	2.40046e-223	1.54813
Spi1	0.902	0.315	8.38477e-223	1.53265
Gda	0.817	0.271	1.54342e-222	1.59856
Mrpl33	0.9	0.653	3.71796e-221	1.2374
Clec4e	0.678	0.124	2.12891e-217	1.74801
Cybb	0.819	0.238	3.51303e-217	1.60404
Fam49b	0.904	0.391	4.26938e-217	1.47788
Srgn	0.982	0.616	1.09623e-214	1.52968
Cd244	0.508	0.054	2.07321e-212	1.40534
Lst1	0.905	0.315	6.24954e-212	1.45079
H3f3a	0.997	0.967	3.2466e-209	0.949752
Emilin2	0.732	0.214	2.23101e-208	1.50857
Pirb	0.735	0.205	2.09581e-204	1.496
Arpc1b	0.998	0.923	3.66094e-204	0.944261
Samhd1	0.789	0.345	2.00793e-202	1.50789
Lsp1	0.933	0.594	1.92274e-201	1.3181
Sub1	0.961	0.772	2.75356e-201	1.157
Shfm1	0.98	0.89	2.96001e-201	1.01197
Smpdl3a	0.838	0.479	2.0124e-200	1.38694
Igfbp7	0.257	0.736	9.33541e-197	-3.65966
S100a6	0.997	0.835	1.27279e-196	0.719108
Fcgr3	0.894	0.297	4.70795e-196	1.22546
Tmsb10	0.997	0.936	6.04637e-195	1.06728
Sparc	0.191	0.681	4.75291e-192	-3.71734
Plaur	0.685	0.163	2.4043e-190	1.58106
Lilrb4a	0.842	0.27	7.2108e-190	1.54036
Clec4a3	0.755	0.213	1.79429e-188	1.52033
Plbd1	0.729	0.18	1.03339e-187	1.4003
Sirpb1b	0.614	0.123	1.40361e-186	1.38087
Ctsc	0.907	0.372	6.28569e-185	0.745859
Slfn2	0.866	0.37	1.22126e-183	1.48213
Arpc2	0.982	0.873	1.38054e-182	0.98902
Cd53	0.931	0.409	9.56596e-181	1.30249
Tgfbi	0.926	0.43	1.09358e-180	1.25278
Lrg1	0.472	0.06	2.60049e-180	2.13698
Klra2	0.487	0.059	2.86793e-180	1.21313
Il1b	0.802	0.26	9.08718e-179	1.78516
Gmfg	0.828	0.303	1.63513e-174	1.35121
Dmkn	0.386	0.029	9.95394e-174	1.53619
Pld4	0.778	0.249	1.37824e-173	1.38276
Ptma	0.943	0.988	2.4798e-168	-1.06209
Rps9	1	0.991	1.00787e-165	0.720285
Ifitm2	0.997	0.881	5.83806e-164	0.98042
Gpx1	0.98	0.791	3.89689e-162	1.0398
Ifi30	0.866	0.369	2.70992e-161	1.27541
Ccr1	0.678	0.189	2.82282e-161	1.612
Serpinh1	0.109	0.587	1.9004e-157	-2.61636
Malat1	1	0.998	3.77011e-157	-1.16781
Tarm1	0.343	0.025	1.03247e-153	1.06241
Lyn	0.797	0.339	1.86628e-153	1.24834
Gsn	0.582	0.821	6.47294e-153	-3.75397
Crip2	0.103	0.58	1.34765e-152	-2.30012
Mpeg1	0.781	0.254	5.30778e-152	1.12609
Npc2	0.971	0.798	9.1953e-152	0.982964
Rnf149	0.704	0.288	3.43623e-151	1.3292
Cotl1	0.938	0.512	2.05524e-150	0.822507
Ptprc	0.806	0.314	5.04848e-150	1.28143
Cd68	0.822	0.301	7.52733e-149	0.97811
Rhoc	0.059	0.538	4.3379e-148	-1.81943
Cd34	0.078	0.537	6.06072e-145	-2.32742
Sparcl1	0.072	0.549	5.92906e-144	-2.47515
Zbtb20	0.077	0.563	2.69028e-142	-2.04981
Rnh1	0.778	0.521	4.59264e-142	1.16261
Mgst1	0.76	0.355	4.0448e-141	1.32149
S100a16	0.052	0.509	9.88663e-141	-1.84606
Fabp4	0.324	0.704	1.93122e-140	-4.16375
Ebf1	0.038	0.505	1.08927e-139	-2.04161
Actr3	0.938	0.695	1.1582e-138	0.983125
Laptm5	0.904	0.404	1.67931e-138	0.944903
Ms4a6b	0.773	0.277	2.59496e-137	1.22652
Fau	1	0.994	9.95836e-137	0.558911
Fam96a	0.766	0.403	1.45266e-136	1.15152
Ly6a	0.181	0.619	3.41628e-136	-2.75742
Ms4a6d	0.765	0.262	5.87876e-136	1.17623
Slc25a5	0.928	0.741	4.12221e-135	0.973927
Esd	0.801	0.563	4.49722e-135	1.06638
Tuba1a	0.351	0.719	1.84401e-134	-1.95851
Irf5	0.658	0.232	2.37884e-134	1.17269
Sptbn1	0.134	0.589	1.82707e-133	-1.86638
Fgr	0.536	0.117	5.5936e-133	1.10768
Tcf4	0.227	0.673	1.79361e-132	-1.74265
Btg1	0.974	0.786	3.38827e-132	1.01524
Gng11	0.092	0.546	4.57802e-132	-2.51481
Mafb	0.781	0.373	1.07455e-131	1.50271
Cd63	0.121	0.578	3.26741e-130	-2.19899
Dcn	0.199	0.635	2.84157e-129	-3.93642
Pim1	0.801	0.369	2.96558e-129	1.34311
Hmgn1	0.072	0.524	5.74374e-129	-1.43636
Cd9	0.18	0.641	5.76146e-129	-1.91575
Cd14	0.747	0.267	9.07218e-128	1.41191
Gm2a	0.871	0.488	2.14024e-126	1.09725
Hspb1	0.074	0.515	2.679e-126	-2.20547
Mgp	0.242	0.654	4.23532e-126	-3.50566
Cytip	0.644	0.198	2.40607e-125	1.18324
Cdk2ap2	0.799	0.535	8.99974e-125	1.14466
Prkcdbp	0.044	0.474	1.9064e-124	-1.75135
Sec61b	0.926	0.771	6.43719e-124	0.859423
Hspa8	0.995	0.974	6.87395e-124	0.86261
Ltbp4	0.065	0.504	8.38446e-124	-1.86508
Sh3bgrl3	0.992	0.867	4.64027e-123	0.666798
Igsf6	0.505	0.132	8.83513e-123	1.12763
Clec4a1	0.644	0.193	1.40668e-122	1.06976
Ccdc109b	0.627	0.259	2.36774e-122	1.07984
Itgb2	0.735	0.269	3.8368e-122	1.10957
Tm4sf1	0.092	0.532	1.54825e-121	-2.47107
H2afj	0.812	0.533	5.42942e-121	1.01428
Mcl1	0.853	0.534	1.15629e-120	1.06958
H2afz	0.936	0.77	1.33034e-120	0.950518
AB124611	0.652	0.222	7.28393e-120	1.14139
Cald1	0.042	0.467	1.16806e-119	-1.73058
Anxa2	0.958	0.785	1.53836e-119	0.947467
Bin2	0.593	0.183	2.14748e-119	1.11981
Ltb4r1	0.475	0.098	1.28064e-117	1.12545
Ncf4	0.649	0.22	4.58112e-117	1.12424
Spp1	0.547	0.295	4.56674e-116	-1.64353
Itgb7	0.48	0.1	7.57418e-115	1.02744
Fn1	0.802	0.396	8.10557e-115	0.564834
Ramp2	0.047	0.455	9.93256e-115	-1.79512
Csf2rb	0.484	0.121	1.2539e-114	1.09193
Ptrf	0.051	0.461	5.23393e-114	-1.6951
Serpinb6a	0.067	0.489	5.38677e-113	-1.45698
Vsir	0.716	0.315	9.86565e-113	1.09815
Nfib	0.033	0.438	1.31666e-112	-1.44391
Capza2	0.902	0.692	1.36868e-112	0.901828
Adssl1	0.52	0.127	1.48732e-112	0.937776
Cd177	0.291	0.025	2.15396e-112	0.832212
Sell	0.469	0.093	3.91917e-112	1.10394
Plpp3	0.041	0.454	8.89431e-112	-1.71434
Il17ra	0.502	0.135	3.82534e-111	1.01397
Rpl36al	0.971	0.885	2.57974e-110	0.759579
Cd300a	0.562	0.164	2.72118e-110	1.08971
Ifi204	0.644	0.239	1.03479e-109	1.12817
Col4a1	0.052	0.462	2.24713e-109	-1.65136
Ddah2	0.031	0.425	2.73327e-109	-1.40259
Gas6	0.036	0.433	9.90201e-109	-1.52653
Samsn1	0.528	0.143	2.05863e-108	1.08166
Card19	0.717	0.376	5.8972e-108	1.0943
Pfn1	0.993	0.94	6.65922e-108	0.591928
Rac2	0.812	0.381	7.73073e-108	0.80279
Cebpb	0.616	0.244	9.88809e-107	1.14438
Rps27a	1	0.995	1.36999e-106	0.543918
Selm	0.106	0.497	4.68072e-106	-1.58117
Igfbp4	0.072	0.47	9.243e-106	-2.25133
Ctsh	0.84	0.425	1.28687e-105	0.801074
Tspo	0.967	0.826	1.71652e-105	0.817719
Tgfb1	0.76	0.497	4.19925e-104	1.03838
Ptms	0.221	0.629	4.21113e-104	-1.30666
Gpr35	0.392	0.079	5.16843e-104	0.937774
Pabpc1	0.956	0.81	7.16992e-104	0.848068
Gm5150	0.446	0.101	2.40782e-103	1.01874
Plek	0.662	0.248	2.70799e-103	1.18234
Pea15a	0.08	0.487	1.01978e-102	-1.14879
Fyb	0.748	0.302	3.5619e-102	0.918377
Pitpna	0.807	0.497	6.61232e-102	1.00016
Diaph1	0.583	0.262	1.01248e-101	1.01261
AI839979	0.315	0.046	2.04382e-101	0.827696
Gnas	0.791	0.919	3.65027e-101	-1.0725
Pkm	0.93	0.774	1.144e-100	0.849186
Pmp22	0.049	0.427	5.05245e-100	-1.74648
Nenf	0.126	0.528	8.59577e-100	-1.34249
Hspg2	0.041	0.416	1.39905e-99	-1.3425
Sepw1	0.498	0.82	2.21101e-99	-1.0856
Bgn	0.113	0.479	2.58498e-99	-2.93313
Nedd4	0.044	0.417	3.20863e-99	-1.31311
Csf1r	0.681	0.263	3.32487e-99	0.769249
Actb	1	0.998	6.82195e-99	1.0102
Lrrc25	0.559	0.182	3.52175e-98	1.00703
Eva1b	0.065	0.447	3.53937e-97	-1.21859
Trem3	0.309	0.039	1.856e-96	0.856734
Lpl	0.129	0.508	1.15862e-95	-1.80006
Eng	0.054	0.428	1.22591e-95	-1.65901
Selplg	0.66	0.253	1.91553e-95	0.940561
Arpc5	0.907	0.728	2.7689e-95	0.806205
Timp2	0.196	0.531	4.06887e-95	-1.64425
Skap2	0.655	0.287	4.46882e-94	1.01597
Naaa	0.525	0.208	9.02725e-94	0.989687
AI662270	0.616	0.227	1.27496e-93	1.02356
Fermt2	0.029	0.389	2.17798e-93	-1.26662
Nrp1	0.193	0.568	2.55354e-93	-1.64583
Pycard	0.708	0.357	8.89972e-93	1.0569
Rhoj	0.029	0.381	1.27801e-92	-1.30336
Timp3	0.067	0.432	3.00434e-91	-1.70399
Ccdc80	0.059	0.413	6.95975e-91	-2.27839
Nid1	0.039	0.391	1.01811e-90	-1.52274
Vcan	0.572	0.245	1.07361e-90	1.10157
AI607873	0.583	0.236	1.24778e-90	1.05469
Tubb5	0.443	0.778	3.09104e-90	-1.13825
Col4a2	0.044	0.394	3.92059e-90	-1.41679
Ppic	0.031	0.367	5.30948e-90	-1.24639
Socs2	0.016	0.351	1.66549e-89	-1.14824
Col3a1	0.129	0.474	2.14007e-89	-2.85692
Csrp1	0.047	0.402	2.14834e-89	-1.14073
Ly6c1	0.141	0.462	4.37432e-89	-2.70055
Thbs1	0.623	0.266	3.2108e-88	1.45861
Kdm7a	0.536	0.219	3.45478e-88	0.970981
Slc43a3	0.039	0.389	4.10335e-88	-1.32493
Lcp1	0.789	0.372	4.33028e-88	0.762229
Lum	0.087	0.43	5.62267e-88	-2.4785
Sec61g	0.956	0.86	7.08536e-88	0.725264
Cfl1	0.995	0.95	2.40017e-87	0.606968
Plpp1	0.031	0.371	5.15423e-87	-1.30541
Htra3	0.049	0.401	8.56938e-87	-2.25869
Serping1	0.057	0.4	8.79162e-87	-2.30303
Fbln2	0.056	0.396	2.75546e-86	-1.79113
Ifi27	0.18	0.558	3.77406e-86	-1.1893
Dbi	0.923	0.713	5.18563e-86	0.772305
Pcolce	0.074	0.421	5.24577e-86	-2.03898
Rarres2	0.042	0.376	1.16205e-84	-1.79644
Mfap5	0.062	0.395	1.50001e-84	-2.36946
Fstl1	0.049	0.389	1.57014e-84	-2.01862
Cygb	0.036	0.362	4.76935e-84	-1.88884
Fxyd1	0.02	0.334	7.78597e-84	-1.39501
Sat1	0.913	0.712	7.99254e-84	0.891023
Snx20	0.511	0.173	9.27624e-84	0.902634
Fcgrt	0.123	0.47	1.74905e-83	-1.11668
Lhfp	0.046	0.375	2.51444e-83	-1.70374
Fxyd6	0.028	0.35	4.54644e-83	-1.39832
Ppia	0.984	0.992	6.02379e-83	-0.627472
Rbp1	0.041	0.366	7.35357e-83	-1.79162
Npdc1	0.029	0.35	9.29647e-83	-1.04393
Ly86	0.631	0.259	6.2028e-82	0.666621
Col1a2	0.087	0.411	9.17026e-82	-2.60173
Cnn3	0.052	0.393	1.05726e-81	-1.11652
Dpt	0.044	0.37	1.3614e-81	-1.92108
Rassf4	0.502	0.172	2.17587e-81	0.931202
Lgals1	0.833	0.797	2.17795e-81	-1.06804
Serpinf1	0.041	0.355	7.54001e-81	-1.73984
Trem1	0.309	0.053	9.32448e-81	0.854516
Clec4a2	0.606	0.224	1.25391e-80	0.905679
Clec4d	0.497	0.151	1.98044e-80	1.06687
Metrnl	0.721	0.351	2.00529e-80	0.973213
Ehd2	0.015	0.313	2.79987e-80	-1.07587
Axl	0.049	0.376	3.64934e-80	-1.28807
Capzb	0.91	0.755	5.0916e-80	0.731932
Col1a1	0.047	0.369	6.5381e-80	-2.54267
Pla2g7	0.564	0.198	1.24351e-79	1.03395
Trim47	0.029	0.354	3.84837e-79	-0.931265
Rcn3	0.042	0.356	1.36399e-78	-1.42881
Stk17b	0.683	0.307	3.17318e-78	0.874787
Cd151	0.092	0.442	5.09002e-78	-1.14634
Junb	0.989	0.852	5.89694e-77	0.667494
Slc9a3r2	0.046	0.354	6.32734e-77	-1.67739
Nfil3	0.422	0.134	6.39393e-77	0.867387
Mfge8	0.077	0.407	8.40734e-77	-1.26353
Txnip	0.224	0.567	8.49054e-77	-1.17678
Osm	0.443	0.131	1.1876e-76	1.18652
Rnase4	0.178	0.498	1.55736e-76	-1.38543
Col6a1	0.039	0.346	2.42379e-76	-1.5304
Prr13	0.786	0.588	2.58267e-76	0.834065
Olfml3	0.036	0.346	3.9598e-76	-1.19798
Mmp19	0.263	0.07	4.03165e-76	0.866648
Rplp1	0.997	0.996	4.22122e-76	-0.695829
Kdm6b	0.534	0.253	5.15897e-76	1.09885
Mmp2	0.033	0.339	5.57176e-76	-1.50239
Rap1b	0.891	0.718	6.91523e-76	0.777786
Trib1	0.497	0.186	7.47362e-76	0.944194
Pls3	0.031	0.327	1.34698e-75	-1.04977
Gpr141	0.257	0.035	1.63093e-75	0.678508
Dusp1	0.91	0.746	1.98964e-75	0.988006
Ywhaz	0.73	0.488	2.89278e-75	0.821524
Psma7	0.897	0.778	3.0342e-75	0.68467
Slfn1	0.346	0.073	4.2661e-75	0.759393
Evi2a	0.565	0.223	4.12427e-74	0.900949
Slc7a11	0.301	0.052	4.81903e-74	1.03076
Mxra8	0.026	0.324	1.37631e-73	-1.16577
Gpx3	0.106	0.416	1.45159e-73	-2.2619
Ptpre	0.538	0.206	1.95902e-73	0.897486
Itgal	0.291	0.051	2.89951e-73	0.686396
Pi16	0.345	0.397	5.25816e-73	-1.57616
Tpm1	0.07	0.404	1.42951e-72	-1.08745
Rpl12	0.861	0.922	1.72319e-72	-0.918885
Phlda3	0.023	0.32	2.10229e-72	-1.02939
Tifab	0.355	0.086	2.41059e-72	0.741293
Loxl1	0.059	0.354	2.65976e-72	-1.5901
Sepp1	0.662	0.786	3.54952e-72	-1.13724
Ptpn18	0.792	0.42	3.55584e-72	0.705795
Lilr4b	0.547	0.199	1.0272e-71	0.906132
Adora2b	0.266	0.054	1.27228e-71	0.756235
S100a11	0.984	0.886	1.28128e-71	0.70977
Sdc2	0.031	0.328	1.57093e-71	-1.30881
Aprt	0.789	0.493	3.15792e-71	0.813677
Sdpr	0.041	0.329	4.65059e-71	-2.21499
Myo1f	0.474	0.166	6.37916e-71	0.822755
Slc25a4	0.381	0.662	6.93723e-71	-1.02702
Wbp5	0.157	0.51	1.42687e-70	-1.01655
Itgam	0.523	0.192	1.58861e-70	0.861809
Gas1	0.031	0.323	3.4261e-70	-1.7012
Nrros	0.572	0.236	4.52738e-70	0.879458
Clec3b	0.036	0.327	4.80207e-70	-2.34878
Cxcl12	0.059	0.361	6.18583e-70	-2.25713
Vwa1	0.051	0.358	8.70695e-70	-1.12016
Chmp4b	0.771	0.579	1.34691e-69	0.748484
Emp3	0.928	0.714	1.42495e-69	0.722816
Nfia	0.046	0.344	1.8554e-69	-1.11571
Copz2	0.025	0.31	3.82952e-69	-0.8684
Col6a2	0.033	0.326	1.35573e-68	-1.30846
Lims2	0.025	0.303	2.55811e-68	-1.33348
Serp1	0.827	0.591	4.19442e-68	0.75985
Slc16a3	0.461	0.16	5.08411e-68	0.953743
Clic4	0.109	0.432	5.48861e-68	-0.961662
Fbln1	0.034	0.323	6.86702e-68	-1.72773
Col15a1	0.044	0.341	8.0112e-68	-1.27671
Ogn	0.041	0.33	9.8203e-68	-1.72693
Gstm1	0.381	0.534	1.46445e-67	-1.41441
Il6ra	0.477	0.182	1.51192e-67	0.790703
Prelp	0.033	0.318	1.85603e-67	-1.30051
Entpd2	0.029	0.309	2.09478e-67	-1.27993
Hck	0.475	0.174	2.62052e-67	0.862018
Tln1	0.758	0.535	4.2883e-67	0.78236
Unc93b1	0.729	0.396	7.20507e-67	0.719815
Fkbp9	0.028	0.313	1.08504e-66	-0.871091
2310022A10Rik	0.307	0.089	1.65834e-66	0.730907
Id3	0.294	0.582	2.2332e-66	-1.65224
Csf2ra	0.51	0.198	4.02919e-66	0.817597
Ccnd1	0.044	0.341	4.58524e-66	-1.14442
Smoc2	0.056	0.344	6.47234e-66	-2.05831
Mxra7	0.031	0.308	8.21918e-66	-0.887036
Mgll	0.038	0.308	9.01482e-66	-1.9751
Gimap6	0.041	0.304	1.34454e-65	-1.42438
Hcls1	0.636	0.29	1.38243e-65	0.83083
Ccnd2	0.054	0.348	1.52112e-65	-1.17566
Mast4	0.021	0.292	1.84021e-65	-0.892001
Ckb	0.208	0.516	2.20012e-65	-1.17843
Cd36	0.105	0.38	3.33434e-65	-2.26259
Fbn1	0.029	0.309	5.03343e-65	-1.24213
Sla	0.395	0.124	7.11344e-65	0.817188
Klf13	0.794	0.594	8.82107e-65	0.788785
Lamc1	0.064	0.372	1.48221e-64	-1.14322
Serpine2	0.039	0.315	2.24532e-64	-1.35567
Zbp1	0.412	0.13	3.28913e-64	0.798826
Meg3	0.026	0.301	3.91493e-64	-1.79978
Crip1	0.992	0.943	1.22044e-63	0.593363
Glipr1	0.444	0.154	1.24993e-63	0.821292
Sept4	0.016	0.272	2.04794e-63	-1.24087
Zeb1	0.016	0.276	3.29528e-63	-0.789511
Atp1a1	0.663	0.429	6.313e-63	0.830742
Camk2n1	0.021	0.288	6.97304e-63	-1.08873
Ets1	0.039	0.319	9.68186e-63	-1.13805
Tuba1b	0.564	0.8	1.10665e-62	-0.922033
Tnfrsf1b	0.381	0.148	1.29367e-62	0.801812
Slc29a1	0.07	0.361	2.0845e-62	-0.857952
Islr	0.015	0.274	2.62044e-62	-1.09277
Ptgis	0.033	0.298	2.72936e-62	-1.11376
Ucp2	0.748	0.406	1.04456e-61	0.763008
Rabac1	0.551	0.766	1.77749e-61	-0.835461
Tm6sf1	0.613	0.279	2.08436e-61	0.790901
Egfl7	0.036	0.278	2.15356e-61	-1.86223
Cyp4f18	0.472	0.169	2.56201e-61	0.780846
Cd200	0.034	0.296	1.17471e-60	-1.47416
Fam105a	0.565	0.246	1.51793e-60	0.886339
Atp5l	0.969	0.899	1.74151e-60	0.53092
Cxcl16	0.075	0.368	2.14779e-60	-1.11385
H2B-EGFP	0.016	0.267	2.85151e-60	-1.06488
Aspn	0.031	0.281	2.94237e-60	-1.62086
Lamtor4	0.665	0.473	3.45108e-60	0.73425
Lama4	0.018	0.269	4.52953e-60	-0.7755
mt-Cytb	0.98	0.99	5.04665e-60	-0.557509
Akap12	0.02	0.278	5.92213e-60	-0.859976
AW112010	0.17	0.433	6.91951e-60	-1.49106
Gm9843	0.948	0.849	1.24674e-59	0.599378
Jarid2	0.408	0.166	1.38144e-59	0.821102
Heg1	0.047	0.325	1.45208e-59	-0.91987
Thra	0.039	0.318	2.6254e-59	-0.807025
Vkorc1	0.108	0.4	2.96954e-59	-0.895574
Gpm6b	0.034	0.303	9.14762e-59	-1.20089
Fbln5	0.021	0.278	1.04453e-58	-1.05825
Smox	0.395	0.185	1.11548e-58	0.840309
Plat	0.026	0.283	1.34472e-58	-0.892571
Meox1	0.023	0.278	1.59275e-58	-1.12133
Fosl2	0.444	0.199	1.64818e-58	0.809714
Adamts5	0.031	0.292	2.431e-58	-1.34177
Saa3	0.252	0.049	2.63901e-58	1.26533
mt-Nd2	0.884	0.95	3.65766e-58	-0.718373
Pyhin1	0.395	0.122	4.3851e-58	0.814034
Tubb4b	0.232	0.514	5.3393e-58	-1.03494
Msr1	0.475	0.174	6.04047e-58	0.784354
Gcnt2	0.324	0.086	7.34654e-58	0.710872
Ptpn6	0.592	0.269	9.26319e-58	0.795274
Ms4a8a	0.26	0.048	9.74317e-58	0.581689
Gpx8	0.025	0.271	1.55307e-57	-0.811613
Rcn1	0.034	0.286	1.676e-57	-0.768222
Eno1	0.85	0.621	1.93167e-57	0.611746
Fkbp1a	0.65	0.793	2.11636e-57	-0.861251
Sod3	0.031	0.284	2.26144e-57	-0.997235
Cav1	0.09	0.323	2.46435e-57	-1.93949
Snhg18	0.025	0.278	2.52446e-57	-0.921068
Pf4	0.237	0.285	2.82146e-57	-2.08154
Crispld2	0.057	0.317	4.01344e-57	-1.55483
Mtch1	0.324	0.574	5.00921e-57	-0.963137
Smco4	0.033	0.286	5.39584e-57	-0.959867
Cyb5a	0.441	0.675	6.05442e-57	-0.918827
Tbrg1	0.123	0.432	7.70695e-57	-0.846642
mt-Nd1	0.961	0.991	7.73166e-57	-0.567345
Hmox1	0.616	0.296	8.14146e-57	1.34155
Gpihbp1	0.083	0.319	1.37046e-56	-2.19682
Arpc3	0.931	0.844	1.74301e-56	0.520579
Mxd4	0.154	0.452	2.84112e-56	-0.878197
Eln	0.029	0.275	4.08977e-56	-1.63638
Sec11c	0.642	0.398	4.10126e-56	0.738092
Hif1a	0.52	0.283	5.08782e-56	0.844544
Fcgr2b	0.585	0.264	8.41724e-56	0.619223
Abca8a	0.031	0.287	1.31975e-55	-1.07715
Prnp	0.038	0.288	1.3257e-55	-0.87046
Gna11	0.052	0.323	1.51209e-55	-0.802067
Acer3	0.389	0.148	1.95871e-55	0.696477
Fgfr1	0.021	0.263	2.17602e-55	-0.726611
Emp1	0.193	0.507	3.13319e-55	-1.11681
Fos	0.967	0.83	4.20321e-55	0.531991
Laptm4a	0.68	0.81	4.38586e-55	-0.81911
Sorl1	0.302	0.077	6.90208e-55	0.660665
Ptp4a3	0.105	0.358	9.79661e-55	-1.04427
Soat1	0.472	0.213	1.06752e-54	0.77538
Fcgr1	0.525	0.219	1.96156e-54	0.77632
Arhgap30	0.507	0.213	2.27247e-54	0.781011
Pam	0.095	0.379	2.82014e-54	-1.24987
Dpep1	0.042	0.295	3.32878e-54	-1.65981
Zfp36l2	0.719	0.488	3.35691e-54	0.780889
Pcsk6	0.023	0.262	4.08898e-54	-0.990528
Medag	0.023	0.264	4.34157e-54	-0.89505
Smim10l1	0.083	0.372	7.50989e-54	-0.767426
Sgce	0.023	0.255	1.08316e-53	-0.699855
Pcolce2	0.034	0.281	1.23529e-53	-1.21544
Oaf	0.059	0.317	1.40966e-53	-1.10187
Eps8	0.382	0.171	1.66408e-53	0.744586
Efhd2	0.729	0.41	1.71056e-53	0.634187
Col8a1	0.036	0.284	1.81696e-53	-1.50646
Cyb5r3	0.152	0.435	1.88852e-53	-0.887428
Gyg	0.397	0.168	1.8985e-53	0.720805
Anxa1	0.763	0.53	2.26707e-53	0.819223
Pdlim2	0.101	0.371	2.78551e-53	-1.00802
Itgb1	0.351	0.641	5.29382e-53	-0.855781
C1qb	0.198	0.312	5.41428e-53	-2.46896
Cxx1a	0.049	0.306	6.34786e-53	-0.853313
Adam8	0.373	0.123	7.75526e-53	0.885207
Il13ra1	0.337	0.133	1.21691e-52	0.710506
Ostf1	0.889	0.719	1.28156e-52	0.581396
Tubb2a	0.173	0.467	1.61561e-52	-0.919631
Amotl1	0.018	0.251	1.66963e-52	-0.697918
Cpq	0.056	0.309	1.86914e-52	-0.884589
C1qa	0.152	0.275	2.41945e-52	-2.50941
Anxa3	0.232	0.541	2.53665e-52	-0.98277
Slc11a1	0.471	0.184	2.73547e-52	0.765804
Jup	0.07	0.329	3.0521e-52	-0.884231
Plxdc2	0.025	0.266	3.21491e-52	-0.807779
Fhl1	0.028	0.258	3.5568e-52	-0.820212
Tspan4	0.029	0.273	6.46171e-52	-0.698675
Esam	0.046	0.266	1.13371e-51	-1.59948
Bicc1	0.028	0.269	1.86367e-51	-0.854077
Rhog	0.644	0.414	2.36029e-51	0.699618
Mef2c	0.198	0.464	2.97226e-51	-1.02557
Fkbp7	0.051	0.301	3.39218e-51	-0.793064
Adamts2	0.021	0.251	4.41721e-51	-0.82985
Aebp1	0.025	0.258	4.56293e-51	-0.886173
Cyr61	0.029	0.268	8.71507e-51	-1.48759
Ablim1	0.042	0.28	1.09178e-50	-0.840164
Dok3	0.407	0.15	1.14838e-50	0.689402
D1Ertd622e	0.407	0.162	1.3987e-50	0.704045
Pecam1	0.047	0.273	1.68227e-50	-1.34708
Fam129b	0.379	0.187	1.99812e-50	0.712119
Jam2	0.029	0.255	2.17835e-50	-0.960732
Rab32	0.391	0.146	2.98344e-50	0.724719
Ccdc12	0.76	0.573	3.8666e-50	0.655302
Tsc22d1	0.093	0.355	4.81226e-50	-1.01086
C5ar1	0.572	0.262	5.35951e-50	0.973397
Lamb1	0.034	0.271	5.58663e-50	-0.824337
Pmepa1	0.029	0.264	1.49726e-49	-0.780195
Il11ra1	0.064	0.326	1.57996e-49	-0.859613
Vim	0.982	0.9	1.82402e-49	0.557304
Lrrfip1	0.549	0.32	2.61207e-49	0.793726
Htra1	0.029	0.258	2.79698e-49	-0.84455
Tnxb	0.028	0.252	3.82759e-49	-0.926091
Jund	0.686	0.817	3.86114e-49	-0.972438
Igf1	0.033	0.269	4.69221e-49	-0.900824
Zyx	0.616	0.419	5.17046e-49	0.698417
Cp	0.025	0.253	6.87781e-49	-0.908921
Tspan13	0.444	0.376	1.22095e-48	-0.712709
C1qc	0.144	0.263	1.40359e-48	-2.16879
Sash1	0.039	0.281	1.5722e-48	-0.643356
Pebp1	0.387	0.658	1.60186e-48	-0.74454
Ramp1	0.363	0.127	2.92884e-48	0.668335
Gngt2	0.729	0.437	2.9577e-48	0.759594
Mmp14	0.044	0.293	3.78389e-48	-0.685832
Angptl2	0.029	0.252	4.71835e-48	-0.834026
Adgre5	0.554	0.303	6.79984e-48	0.755606
Eef1g	0.779	0.883	1.86809e-47	-0.632525
Myd88	0.402	0.216	2.04606e-47	0.671622
Cmtm7	0.678	0.459	2.45885e-47	0.668119
Rara	0.337	0.118	4.41808e-47	0.625074
Cfh	0.227	0.395	5.33588e-47	-1.31365
Vat1	0.064	0.322	5.71804e-47	-0.671931
Gsto1	0.387	0.168	6.39034e-47	0.646318
Bst1	0.322	0.105	6.57817e-47	0.681626
Arhgap31	0.127	0.342	7.68574e-47	-1.0172
H2afv	0.225	0.502	8.40468e-47	-0.778701
Cryab	0.038	0.272	1.86561e-46	-0.841296
Gm6377	0.356	0.126	3.2482e-46	0.742803
Tmem140	0.034	0.26	5.96991e-46	-0.747189
Hmgb1	0.753	0.88	1.00606e-45	-0.674691
Klf9	0.136	0.406	2.54603e-45	-0.904908
Tlr2	0.397	0.165	6.54053e-45	0.733494
Pomp	0.814	0.696	7.07632e-45	0.560567
Ahnak	0.856	0.659	7.84503e-45	0.651066
Ywhaq	0.426	0.681	1.09313e-44	-0.70762
Hist1h2bc	0.098	0.346	1.95349e-44	-0.906623
Map2k3	0.454	0.268	2.5836e-44	0.673628
Rhob	0.178	0.445	2.69136e-44	-0.852913
Cxcl2	0.542	0.258	7.42168e-44	0.853826
1110008F13Rik	0.683	0.525	8.69155e-44	0.598301
Pira2	0.273	0.075	9.53729e-44	0.574552
G0s2	0.072	0.318	1.03294e-43	-1.29865
Atf5	0.06	0.278	1.20284e-43	-0.973215
Slc15a3	0.412	0.175	1.40769e-43	0.696262
Rac1	0.9	0.779	1.51536e-43	0.537084
Glud1	0.632	0.453	2.13089e-43	0.629496
H2afy	0.678	0.494	2.49444e-43	0.653375
Prkcd	0.503	0.274	2.81851e-43	0.683005
Itga4	0.328	0.108	4.11499e-43	0.636546
Cmpk1	0.681	0.504	4.57661e-43	0.614144
Pygl	0.258	0.07	4.96254e-43	0.554361
Eif4a2	0.387	0.65	6.09933e-43	-0.715591
Pigp	0.06	0.301	1.57178e-42	-0.610291
Idh1	0.374	0.233	1.78778e-42	0.583857
Nadk	0.534	0.341	2.45348e-42	0.628034
Ccser2	0.049	0.282	2.85148e-42	-0.66116
Prdx6	0.685	0.491	2.94235e-42	0.682249
Calu	0.141	0.402	3.01497e-42	-0.767393
Actr2	0.732	0.527	3.24544e-42	0.685724
Capg	0.784	0.547	3.41889e-42	0.542017
Atp2b1	0.701	0.492	1.06855e-41	0.63743
Ninj1	0.621	0.35	1.13655e-41	0.728322
Atp6v1e1	0.67	0.491	1.19973e-41	0.628469
Ppp1ca	0.876	0.78	1.26317e-41	0.501584
Icam2	0.103	0.278	1.47498e-41	-1.28684
Bri3bp	0.281	0.104	4.03494e-41	0.573123
Aqp1	0.077	0.255	1.14216e-40	-2.01026
Slc50a1	0.154	0.408	1.70426e-40	-0.705942
Ppt1	0.626	0.423	2.19902e-40	0.653494
Btg2	0.907	0.722	2.54341e-40	0.580986
H1f0	0.137	0.392	2.83679e-40	-0.846713
Gm8730	0.923	0.773	3.76305e-40	0.521455
Dab2	0.131	0.365	4.01315e-40	-1.04804
Gch1	0.348	0.133	1.88971e-39	0.674758
Atp6v0b	0.827	0.656	2.18009e-39	0.552179
Rgs2	0.616	0.334	4.56676e-39	0.606221
Pstpip1	0.346	0.134	6.19373e-39	0.581762
Cib1	0.529	0.325	8.30542e-39	0.621447
Clec12a	0.413	0.171	8.45187e-39	0.575779
Flna	0.58	0.394	8.99933e-39	0.635233
Apoe	0.949	0.87	1.27571e-38	-0.978059
Arpc4	0.788	0.595	1.42166e-38	0.594175
Cdkn2d	0.4	0.202	2.14568e-38	0.666548
B4galt5	0.345	0.167	2.3581e-38	0.642071
Neat1	0.83	0.674	2.36781e-38	0.648597
Rdx	0.286	0.539	2.67677e-38	-0.732702
Tpst1	0.095	0.324	3.39462e-38	-0.67408
Tmem59	0.585	0.756	4.72857e-38	-0.655647
Gm42418	0.364	0.617	5.53249e-38	-0.871033
Cap1	0.502	0.284	6.27178e-38	0.678743
Fam49a	0.283	0.114	6.85403e-38	0.566263
Tnfaip8l2	0.467	0.215	1.19016e-37	0.660845
Ethe1	0.394	0.202	1.23996e-37	0.58907
Tprgl	0.314	0.577	1.43393e-37	-0.657453
Stx7	0.605	0.422	1.49145e-37	0.60862
Bcl3	0.309	0.122	1.58989e-37	0.642714
Atg3	0.521	0.334	1.68454e-37	0.604585
Ctsa	0.701	0.461	2.79781e-37	0.620605
Ccl2	0.529	0.266	2.85532e-37	0.673953
Ier3	0.649	0.426	3.34932e-37	0.857483
Map1lc3a	0.196	0.421	3.98313e-37	-0.698123
Hsp90ab1	0.935	0.969	4.0648e-37	-0.545061
Cfl2	0.085	0.314	4.42261e-37	-0.623018
Picalm	0.654	0.451	4.60018e-37	0.647113
Gm10073	0.65	0.79	5.44361e-37	-0.698455
Luzp1	0.083	0.303	7.21745e-37	-0.637603
Ace	0.064	0.285	9.06042e-37	-0.767209
Aplp2	0.345	0.556	9.34625e-37	-0.785148
Pgrmc1	0.119	0.359	1.11639e-36	-0.629006
Lcp2	0.301	0.11	1.21566e-36	0.574071
Sep15	0.654	0.809	1.41695e-36	-0.607992
Pgd	0.492	0.28	2.49456e-36	0.640058
H2-Eb1	0.209	0.325	2.63965e-36	-2.36791
Zfp36	0.794	0.575	3.22951e-36	0.54115
Ccnd3	0.618	0.435	3.69829e-36	0.612446
Ifi27l2a	0.871	0.72	4.93375e-36	0.530525
Pid1	0.693	0.447	5.07114e-36	0.609918
Fus	0.52	0.726	5.20822e-36	-0.646563
Tceal8	0.098	0.339	5.34183e-36	-0.594734
Nfic	0.222	0.455	5.42329e-36	-0.712317
Tkt	0.645	0.493	6.56371e-36	0.568387
Xbp1	0.737	0.581	1.05867e-35	0.596711
Mrpl52	0.842	0.696	1.08645e-35	0.559532
Flot1	0.422	0.291	1.14542e-35	0.569822
Bcl2	0.057	0.26	1.43812e-35	-0.715049
Fundc2	0.196	0.454	1.62234e-35	-0.620239
Glrx	0.408	0.209	2.35364e-35	0.737091
Pltp	0.09	0.293	2.38655e-35	-0.800247
Plod1	0.077	0.299	2.68968e-35	-0.602736
Atp6v1b2	0.459	0.267	2.71427e-35	0.624235
Fermt3	0.415	0.188	3.27931e-35	0.564509
Rab20	0.327	0.129	5.07819e-35	0.666616
Nfam1	0.271	0.09	6.11367e-35	0.52832
Ctsl	0.601	0.754	9.93148e-35	-0.806597
Trim30a	0.466	0.243	1.16078e-34	0.678372
Jun	0.6	0.768	1.25466e-34	-1.01509
Nfix	0.088	0.306	1.29747e-34	-0.719309
Hpcal1	0.56	0.352	1.30633e-34	0.599387
Lmna	0.239	0.505	1.35414e-34	-0.715793
Stub1	0.217	0.471	3.09004e-34	-0.602067
Ist1	0.387	0.209	3.19238e-34	0.600724
Emilin1	0.096	0.319	3.78283e-34	-0.688272
Dpysl2	0.243	0.489	3.83526e-34	-0.694576
Itm2c	0.364	0.598	4.35537e-34	-0.663784
Ece1	0.057	0.261	4.46565e-34	-0.650545
Bsg	0.621	0.763	5.06748e-34	-0.624253
Fmnl1	0.361	0.158	5.53227e-34	0.568123
Ptov1	0.116	0.348	5.95845e-34	-0.591579
Wasl	0.062	0.264	6.56699e-34	-0.570026
Drap1	0.232	0.48	6.96333e-34	-0.646904
Fkbp3	0.201	0.455	7.42853e-34	-0.618701
Ctage5	0.464	0.278	7.63939e-34	0.582012
Snrk	0.119	0.326	7.90215e-34	-0.741491
Mpc1	0.598	0.504	8.0452e-34	0.505425
Camkk2	0.328	0.173	1.09827e-33	0.562273
Ctsz	0.876	0.718	1.39593e-33	0.52529
4930523C07Rik	0.163	0.388	1.45735e-33	-0.8075
Milr1	0.337	0.143	1.79531e-33	0.58329
Nav1	0.108	0.33	1.93328e-33	-0.657191
Itgb5	0.162	0.404	1.95645e-33	-0.675827
Cyth3	0.074	0.29	2.54746e-33	-0.605851
Txnrd1	0.343	0.204	2.97444e-33	0.614028
Socs3	0.627	0.428	2.98117e-33	0.788286
Tmem38b	0.288	0.129	3.3309e-33	0.523247
Tmem51	0.296	0.119	4.52468e-33	0.573926
Ikbkb	0.5	0.291	1.26957e-32	0.59566
Aes	0.294	0.543	1.75201e-32	-0.665598
Pnkd	0.131	0.356	4.04361e-32	-0.583432
Pttg1ip	0.165	0.397	4.33267e-32	-0.604988
Ptafr	0.343	0.141	4.33849e-32	0.725143
Cd48	0.523	0.271	5.01886e-32	0.550338
Gpcpd1	0.351	0.178	6.86717e-32	0.62838
Tgfbr2	0.098	0.307	6.95577e-32	-0.552655
Cav2	0.078	0.253	7.23614e-32	-1.02164
Dhrs3	0.152	0.388	7.26134e-32	-0.669867
Fbxl5	0.374	0.199	9.8979e-32	0.609109
Tmed3	0.301	0.534	1.07312e-31	-0.666007
Vamp5	0.067	0.263	1.46465e-31	-0.649516
Tuba1c	0.461	0.246	1.5212e-31	0.625591
Man2b1	0.493	0.277	1.5358e-31	0.592156
Sec62	0.533	0.712	1.68545e-31	-0.603806
Casp1	0.279	0.104	1.98954e-31	0.518997
Nck1	0.158	0.336	2.14132e-31	-0.698918
Tnfrsf1a	0.668	0.511	2.23289e-31	0.551721
Bst2	0.428	0.594	4.54614e-31	-0.760436
Cyth4	0.467	0.232	5.45815e-31	0.517797
Rbbp7	0.103	0.313	8.28643e-31	-0.531331
Tnpo3	0.356	0.226	9.25182e-31	0.586462
Slc2a1	0.263	0.098	1.03793e-30	0.559247
Tmem14c	0.73	0.597	1.3651e-30	0.508807
Gabarapl1	0.1	0.313	1.77259e-30	-0.589683
Bach1	0.322	0.149	2.66151e-30	0.558899
Atf3	0.567	0.326	3.82294e-30	0.536721
Tex264	0.098	0.312	3.84604e-30	-0.518695
Ifngr2	0.564	0.384	4.36046e-30	0.583846
Fes	0.374	0.187	4.76683e-30	0.564267
Tspan3	0.132	0.363	5.09348e-30	-0.583588
Nr4a1	0.554	0.336	6.34026e-30	0.59351
Ktn1	0.083	0.281	7.05306e-30	-0.635897
Acvrl1	0.15	0.353	9.66399e-30	-0.648543
Csrp2	0.116	0.269	1.0683e-29	-0.798086
Zfp36l1	0.374	0.621	1.22489e-29	-0.611228
Vmp1	0.534	0.379	1.25837e-29	0.576834
Golim4	0.062	0.256	1.57564e-29	-0.522688
Tusc3	0.093	0.298	2.32004e-29	-0.533448
Pla2g16	0.065	0.251	2.95762e-29	-0.56885
Vamp4	0.417	0.293	3.15886e-29	0.519284
Baz1a	0.41	0.21	3.27348e-29	0.589189
Lamp2	0.742	0.623	3.64738e-29	0.522403
Timm10b	0.639	0.505	3.82012e-29	0.525534
Cycs	0.708	0.564	4.18048e-29	0.536859
Lrrc8a	0.064	0.257	5.33964e-29	-0.64378
Abracl	0.685	0.516	6.23828e-29	0.534705
Bcl7c	0.121	0.342	1.04943e-28	-0.513259
Aldh3b1	0.314	0.141	1.08583e-28	0.520434
Hacd4	0.391	0.185	1.14094e-28	0.548171
Ap1s2	0.487	0.313	1.14739e-28	0.56813
Igfbp6	0.25	0.355	1.6297e-28	-0.892967
Vamp8	0.743	0.579	1.72595e-28	0.507592
Pura	0.193	0.428	2.05017e-28	-0.572652
Tnfsf12	0.121	0.338	2.87494e-28	-0.521946
Klf2	0.65	0.803	3.62465e-28	-0.90018
Mbd3	0.139	0.36	4.04766e-28	-0.50175
Eef1d	0.577	0.742	4.17752e-28	-0.527503
Runx1	0.346	0.171	4.35401e-28	0.579416
Sap30	0.369	0.188	4.48486e-28	0.571061
Klf7	0.183	0.402	4.97136e-28	-0.671654
Iqgap1	0.773	0.566	5.81145e-28	0.513407
Stk40	0.265	0.127	6.76017e-28	0.502581
Nucks1	0.172	0.396	7.30186e-28	-0.539178
Ndufa5	0.304	0.535	8.45898e-28	-0.545766
Pilra	0.366	0.166	1.51118e-27	0.560023
Oaz2	0.227	0.427	1.57236e-27	-0.657046
Oat	0.221	0.428	3.1813e-27	-0.551765
Csrnp1	0.319	0.138	3.99619e-27	0.55038
Atraid	0.258	0.494	5.42059e-27	-0.534374
Nfe2l2	0.631	0.512	7.11155e-27	0.54249
Pcmtd1	0.095	0.285	9.20341e-27	-0.542705
Ehbp1l1	0.374	0.22	9.4705e-27	0.514447
Capza1	0.51	0.345	1.37902e-26	0.527347
Mprip	0.07	0.256	1.55391e-26	-0.520387
Notch2	0.32	0.183	1.95183e-26	0.669285
Tnfaip1	0.108	0.298	2.65289e-26	-0.611113
Trps1	0.425	0.287	4.73197e-26	0.501907
Ppp1r2	0.392	0.552	1.03384e-25	-0.598411
Ppp4c	0.582	0.431	1.37319e-25	0.501632
H2-Ab1	0.382	0.427	1.56532e-25	-1.7316
Cdc42se1	0.451	0.305	1.56675e-25	0.533333
Cltb	0.239	0.452	2.26699e-25	-0.532835
Sptan1	0.136	0.344	2.80368e-25	-0.517698
Arid5b	0.087	0.26	8.73123e-25	-0.605705
Por	0.407	0.278	1.47509e-24	0.568485
Cndp2	0.528	0.346	1.99535e-24	0.585986
Orai1	0.43	0.263	2.17336e-24	0.521688
Camk1	0.194	0.401	2.33791e-24	-0.526773
Cbx3	0.211	0.435	2.91252e-24	-0.554266
Ctnnb1	0.268	0.455	3.6806e-24	-0.597604
Sdf2l1	0.564	0.358	8.92359e-24	0.577293
Fam162a	0.162	0.372	1.03088e-23	-0.510868
Tmpo	0.438	0.272	1.27289e-23	0.525676
Gm10263	0.708	0.554	1.28809e-23	0.501645
Smim14	0.477	0.632	1.52021e-23	-0.52898
Sqstm1	0.253	0.471	2.1613e-23	-0.525043
Tax1bp3	0.258	0.457	2.85081e-23	-0.53043
Ctnna1	0.206	0.389	3.59732e-23	-0.571498
Tmed5	0.583	0.419	5.38282e-23	0.521786
Tmem176b	0.502	0.301	6.74339e-23	0.603447
H2-Aa	0.252	0.377	8.33963e-23	-2.01049
Trf	0.464	0.275	8.74479e-23	0.530354
Sept7	0.511	0.662	3.45161e-22	-0.506829
Zeb2	0.678	0.497	5.02539e-22	0.519149
Glipr2	0.392	0.251	1.06023e-21	0.512644
Dnaja1	0.855	0.778	1.21243e-21	0.501241
P2ry6	0.399	0.208	2.19761e-21	0.55221
Klf4	0.472	0.601	4.09676e-21	-0.774451
Hspa5	0.864	0.787	8.54456e-21	0.545288
Egr1	0.479	0.545	8.75936e-21	-0.727885
Id1	0.155	0.312	1.06776e-20	-1.08242
Fabp5	0.351	0.49	1.38441e-20	-1.10019
Runx3	0.279	0.125	1.41514e-20	0.537629
Ecm1	0.299	0.472	4.3817e-20	-0.664655
Actn4	0.225	0.407	9.52283e-20	-0.519855
Adam15	0.24	0.389	1.46036e-19	-0.569649
Mif	0.461	0.644	1.19851e-18	-0.563554
Cd74	0.464	0.452	1.23765e-18	-1.69099
Ctnnbip1	0.172	0.308	2.1254e-18	-0.599249
Cd93	0.255	0.319	7.0697e-18	-0.544335
Txndc5	0.225	0.406	2.19096e-17	-0.549345
Hspa1a	0.312	0.379	3.44265e-17	-0.926578
Ctsd	0.784	0.74	2.39068e-16	-0.550652
S100a9	0.322	0.255	8.9338e-11	-1.3181
Sgk1	0.237	0.356	5.16867e-10	-0.569097
Ccl7	0.252	0.235	1.01001e-09	-0.903237
Rgcc	0.219	0.299	7.90683e-08	-0.695835

## Sheet: MYO vs rest
Gene	pct.1	pct.2	p_val_adj	Log2FoldChange
Postn	0.987	0.155	0	4.28326
Col1a1	1	0.332	0	4.19924
Col3a1	1	0.439	0	4.15968
Col1a2	1	0.375	0	3.94743
Cthrc1	0.901	0.031	0	3.91176
Ptn	0.875	0.077	0	3.81551
Sfrp2	0.741	0.063	0	3.67177
Eln	0.877	0.242	0	3.51172
Mfap4	0.996	0.182	0	3.32897
Col5a2	0.998	0.207	0	3.00218
Ddah1	0.853	0.025	0	2.74827
Lox	0.943	0.05	0	2.70132
Csrp2	0.982	0.236	0	2.61531
Col8a1	0.971	0.248	0	2.56912
Sfrp1	0.932	0.18	0	2.54096
Bgn	1	0.443	0	2.51253
Fstl1	1	0.351	0	2.49486
Sparc	1	0.647	0	2.41897
1500015O10Rik	0.688	0.022	0	2.36355
Col14a1	0.941	0.155	0	2.09908
Col5a1	0.969	0.179	0	2.07578
Fbn1	0.991	0.272	0	2.04281
Loxl1	1	0.317	0	2.02768
Mdk	0.846	0.061	0	1.99231
Ltbp2	0.829	0.033	0	1.9696
Gxylt2	0.916	0.12	0	1.92102
Tgfb3	0.927	0.119	0	1.86459
C1qtnf6	0.91	0.111	0	1.69366
Col16a1	0.844	0.067	0	1.49683
Wisp1	0.602	0.007	0	1.28621
Adamts2	0.958	0.215	6.51966091502173e-316	1.87279
Rbp1	1	0.329	7.30559794586334e-315	2.21169
Col8a2	0.576	0.01	1.43036396581235e-312	1.03534
Aspn	0.978	0.244	5.94555e-305	2.48623
Mfap2	0.842	0.111	9.68257e-305	1.65807
P4ha3	0.527	0.006	4.78756e-304	0.794011
Timp1	0.934	0.173	1.66738e-299	2.30293
Lyz2	0.815	0.653	1.47933e-296	-4.51609
Pdgfrl	0.853	0.112	1.85991e-295	1.74652
Itgbl1	0.879	0.135	5.63402e-280	1.74356
Fxyd6	0.974	0.313	9.75538e-280	2.00586
Ppic	0.982	0.329	2.93645e-278	1.73056
Ctgf	0.774	0.081	6.1286e-276	1.82749
Pmepa1	0.938	0.229	1.30203e-273	1.71478
Fn1	0.989	0.394	9.62824e-273	2.3386
Igfbp7	1	0.704	6.00494e-268	1.80676
Dkk3	0.679	0.056	1.36096e-265	0.969375
Aebp1	0.945	0.222	2.17929e-265	1.76343
Serf1	0.87	0.139	2.67023e-261	1.3055
Fmod	0.497	0.01	7.51041e-261	1.42111
Palld	0.598	0.026	3.98582e-260	1.0455
Snhg18	0.969	0.241	2.88826e-258	1.57769
Mgp	0.998	0.622	6.0037e-256	2.29364
Mfap5	0.991	0.358	1.88359e-251	2.23875
Comp	0.565	0.024	1.13297e-247	1.98627
Cilp	0.714	0.073	1.94536e-241	2.4341
Col12a1	0.51	0.016	4.51524e-238	0.911263
Plod2	0.738	0.081	5.07497e-236	1.10004
Fcer1g	0.398	0.474	5.92222e-230	-3.33037
Cdh2	0.444	0.01	2.17448e-229	0.64363
Fndc1	0.8	0.126	8.45969e-229	1.32112
Emp1	0.967	0.475	3.12089e-227	1.74515
Synpo	0.679	0.067	3.28652e-227	0.916101
Serpinh1	1	0.549	2.17209e-226	1.5135
Itgb5	0.963	0.373	4.30406e-224	1.46404
Thbs2	0.745	0.122	1.05248e-222	1.50612
Frzb	0.791	0.122	1.37149e-222	1.35485
Loxl3	0.681	0.072	2.89865e-219	1.10432
Ogn	0.976	0.294	1.56932e-218	1.81459
Ptgis	0.965	0.261	1.7637e-218	1.12858
Mmp23	0.901	0.203	9.11472e-218	1.3411
Chpf	0.859	0.162	9.42485e-218	1.14924
Ttll5	0.582	0.038	1.56966e-217	0.871355
Fxyd1	0.93	0.298	2.82824e-217	0.590894
Col6a1	0.989	0.308	2.96568e-217	1.55213
Lhfp	0.991	0.337	5.83812e-216	1.50811
Gucy1a3	0.631	0.054	5.32725e-215	1.34045
Ctsk	0.758	0.107	5.35359e-215	1.15581
Wisp2	0.69	0.1	3.11203e-214	2.51199
Ctss	0.341	0.477	9.80621e-214	-3.23749
Tyrobp	0.376	0.483	6.33831e-213	-3.19689
Fat1	0.651	0.066	1.87836e-212	1.01359
Kif26b	0.336	0.001	2.33299e-211	0.58324
Rasl11b	0.668	0.072	2.22556e-210	1.13783
Gpx7	0.91	0.214	2.0395e-209	1.1156
Gpx8	0.932	0.236	6.87157e-208	1.20788
Serpinf1	0.987	0.317	2.76075e-207	1.56471
Efemp2	0.89	0.2	5.14631e-207	1.12236
Nrep	0.697	0.087	3.09174e-206	1.09257
Pdzrn3	0.47	0.022	3.44941e-206	0.562359
Mxra8	0.974	0.287	5.58863e-206	1.23593
P3h3	0.892	0.202	1.72815e-205	1.06272
Srpx2	0.866	0.184	3.90051e-204	1.29253
Ltbp3	0.763	0.119	1.06541e-203	1.01658
Islr	0.897	0.239	3.63851e-202	0.8947
Cyba	0.87	0.832	2.21418e-200	-1.74202
Tpm2	0.727	0.117	2.95768e-200	0.908658
Gpc6	0.846	0.175	3.50968e-200	1.07332
Mrc2	0.745	0.118	6.4202e-200	0.886506
Dpysl3	0.895	0.214	1.83484e-199	1.15728
Tcea3	0.552	0.04	2.01467e-198	0.796576
Ccdc80	1	0.375	5.18759e-198	1.17286
Mmp2	0.974	0.302	6.44365e-198	1.39962
Actn1	0.829	0.164	2.4705e-196	1.2175
Col6a3	0.855	0.194	3.61249e-195	1.4196
Nfix	0.949	0.273	5.09812e-195	1.10788
Gpm6b	0.905	0.269	1.73519e-194	0.76406
Rcn3	0.974	0.32	3.4537e-194	1.38912
Col27a1	0.587	0.054	3.66346e-194	0.827972
Fkbp10	0.758	0.131	1.44054e-192	0.89026
Creb3l2	0.842	0.181	1.23443e-191	1.03182
Bmp1	0.765	0.146	1.09358e-190	0.799506
Antxr1	0.703	0.107	2.42107e-189	0.841146
Col6a2	0.954	0.29	2.82059e-189	1.33698
Unc5b	0.642	0.099	3.22175e-189	0.686917
Fbln5	0.903	0.244	3.80324e-189	1.48901
H2-D1	0.941	0.974	7.42388e-189	-1.49513
Crlf1	0.51	0.033	1.99648e-187	1.36704
Neo1	0.466	0.03	1.6623e-186	0.568533
Lum	0.993	0.394	1.71272e-185	1.5336
Itm2a	0.763	0.187	3.91281e-185	1.60835
Sdc1	0.585	0.07	7.20468e-185	0.690318
Nox4	0.457	0.022	9.02579e-185	0.666863
Adarb1	0.587	0.078	2.66903e-184	0.649365
Maged1	0.866	0.21	1.62408e-183	1.0021
Enpp1	0.611	0.068	8.90619e-183	0.980085
Nedd4	0.989	0.379	2.48751e-182	1.21641
Lbh	0.864	0.228	4.23021e-182	1.28299
Cdh11	0.396	0.015	5.71919e-182	0.55247
Ak1	0.67	0.098	2.46136e-181	0.827903
Rcn1	0.899	0.253	1.31198e-180	0.862815
Gucy1b3	0.538	0.059	1.48703e-180	0.71027
Serping1	0.963	0.364	4.20294e-180	0.599217
Fgfr1	0.846	0.23	3.67992e-179	0.722086
Cstb	0.923	0.612	7.38124e-179	-0.984822
Tmem45a	0.749	0.141	2.1531e-178	1.10836
Cygb	0.952	0.325	7.56664e-178	0.906726
Tagln	0.532	0.043	4.16893e-177	1.77625
Fkbp9	0.919	0.278	9.66434e-176	0.892059
Ahnak2	0.831	0.204	3.43228e-175	0.902812
Arhgef25	0.58	0.093	1.51433e-174	0.524834
Parva	0.69	0.151	3.50959e-174	0.556896
Npdc1	0.954	0.313	4.45965e-174	1.02354
Gm15867	0.475	0.032	7.11582e-173	0.634206
Pam	0.971	0.345	9.66055e-173	1.16225
Vkorc1	0.976	0.365	1.05703e-172	1.1059
Bicc1	0.868	0.237	1.31711e-172	1.06456
Sdc2	0.859	0.295	1.15461e-171	0.552179
Mxra7	0.91	0.273	1.75524e-171	0.919143
Gng11	0.785	0.516	4.64553e-171	-1.37484
Lgals1	1	0.792	1.02032e-170	1.15714
Dact3	0.543	0.056	1.08485e-169	0.678381
Pxdn	0.69	0.137	9.25908e-169	0.699273
Mmp14	0.859	0.261	1.02458e-168	1.25229
Cpe	0.563	0.074	1.05212e-168	0.787075
Cryab	0.877	0.24	1.77766e-168	1.10832
Rab34	0.747	0.181	2.4903e-168	0.636172
Cercam	0.556	0.065	3.82759e-168	0.639666
Phldb2	0.552	0.076	5.50366e-168	0.647561
Tbx20	0.745	0.153	1.3723e-167	0.924402
Phlda3	0.916	0.285	3.0878e-167	1.12725
Nkd2	0.49	0.038	8.60512e-167	0.777124
Scarf2	0.624	0.117	4.31494e-166	0.563691
Pdgfrb	0.712	0.15	4.46602e-166	0.717268
Fkbp11	0.534	0.061	7.27784e-164	0.649818
Mtch1	0.991	0.547	8.90943e-164	1.13483
Olfml2b	0.587	0.079	1.31735e-163	0.719843
Pcolce	0.985	0.385	1.55666e-163	1.09808
2310022B05Rik	0.662	0.111	2.90581e-163	0.767399
Shisa4	0.558	0.066	4.42631e-163	0.704924
Sertad4	0.545	0.061	7.55151e-163	0.69995
Pdlim3	0.543	0.056	3.64913e-162	1.00627
Emilin1	0.91	0.288	2.17263e-161	1.09918
Fbn2	0.365	0.012	2.36461e-161	0.696293
Maged2	0.787	0.191	6.59593e-160	0.867788
Gm10073	1	0.775	1.65914e-159	1.06386
Crtap	0.778	0.189	4.16582e-159	0.745528
Cd52	0.213	0.534	6.33017e-159	-3.23414
Fzd2	0.519	0.06	8.51726e-159	0.583917
Ptgfrn	0.675	0.149	1.30475e-158	0.581964
Rplp1	1	0.996	2.776e-158	0.681177
Copz2	0.888	0.276	1.13755e-157	0.839657
Gng8	0.464	0.037	1.2295e-157	0.635961
Pbx1	0.747	0.172	2.75304e-157	0.745292
Dpt	0.936	0.334	3.50636e-157	1.02192
Ctsb	0.971	0.807	4.87223e-157	-1.64384
Lamc1	0.903	0.339	7.87821e-157	0.564989
Fabp4	0.754	0.684	1.68118e-156	-3.88926
Ttc3	0.796	0.212	3.11561e-156	0.721425
Nid1	0.954	0.355	4.88215e-156	0.919759
Cst3	1	0.953	1.3145e-155	1.48967
Hspg2	0.954	0.379	4.10284e-155	0.648085
Rbms3	0.695	0.163	7.13017e-155	0.617688
Sdcbp	0.785	0.692	1.23211e-154	-1.11379
Lgmn	0.545	0.454	2.52246e-154	-1.88403
Fbln2	0.958	0.36	4.38433e-154	1.02745
Ccser2	0.796	0.252	5.48162e-154	0.506242
Meg3	0.866	0.268	1.20611e-153	1.76857
Myh10	0.596	0.098	2.37997e-153	0.636017
Sox9	0.681	0.126	3.09212e-153	1.03042
Gata6	0.657	0.126	5.12263e-153	0.712686
Rpl10-ps3	0.985	0.733	5.47907e-153	1.11573
Actr3	0.754	0.704	6.46068e-151	-1.11482
Dst	0.789	0.209	6.68504e-151	0.759841
Tmem119	0.705	0.155	9.94669e-151	0.721657
Ctsh	0.466	0.443	1.08435e-150	-1.28798
Lamb2	0.679	0.169	1.09725e-150	0.540192
Kdelr3	0.807	0.219	1.22708e-150	0.85821
Sox4	0.765	0.196	1.7586e-150	0.788297
Col11a1	0.253	0.002	1.88779e-150	0.755203
Cyr61	0.837	0.236	6.22943e-150	1.53994
Srgn	0.193	0.648	3.23549e-149	-2.83994
Dap	0.949	0.44	4.83787e-149	1.15865
Capza2	0.756	0.7	6.67226e-149	-0.969277
Gas1	0.837	0.291	1.05145e-148	0.570675
Ppfibp1	0.69	0.171	1.05297e-148	0.561957
H2-Ab1	0.462	0.424	1.67106e-148	-3.13527
Nfia	0.877	0.311	2.45962e-148	0.616212
Clec11a	0.437	0.032	5.47611e-148	0.77286
Fam114a1	0.684	0.161	1.85316e-147	0.595381
Eva1b	0.971	0.411	2.0045e-147	1.03582
Fbln1	0.888	0.29	2.99769e-147	1.41387
Txndc5	0.949	0.378	3.45315e-147	1.05293
C1qtnf2	0.754	0.182	2.24705e-146	0.875793
Fhl2	0.547	0.069	2.61708e-146	0.977352
Ptprs	0.585	0.092	3.1347e-146	0.640388
Timp2	0.991	0.499	5.15442e-146	1.05139
Tnc	0.352	0.014	5.54337e-146	0.841992
Arpc5	0.791	0.734	6.12387e-146	-0.987747
Il11ra1	0.888	0.294	6.23117e-145	1.11201
Sulf1	0.69	0.155	1.47469e-144	0.741443
Tmed3	0.985	0.507	4.44752e-144	1.03543
Tpt1	1	0.997	8.28479e-144	0.688066
Wipi1	0.67	0.147	2.10017e-143	0.652744
Thbs3	0.547	0.08	2.84926e-143	0.628207
1810058I24Rik	0.954	0.463	7.86718e-143	1.06299
Matn4	0.312	0.01	1.20936e-142	0.84643
Arhgdib	0.389	0.603	2.82328e-142	-1.73784
P3h1	0.552	0.09	4.43446e-142	0.567315
Tspan6	0.651	0.138	1.7195e-141	0.730065
Pdlim2	0.923	0.338	9.17039e-141	0.947143
Fkbp7	0.848	0.27	1.45486e-140	0.797714
Arpc3	0.903	0.846	2.57105e-140	-0.939457
Plxdc2	0.789	0.236	3.17149e-140	0.706164
Arpc4	0.611	0.604	4.39579e-140	-0.937937
Oaf	0.835	0.286	6.89135e-140	0.751312
Psap	0.982	0.885	1.21611e-139	-1.35419
Selm	0.976	0.462	1.26687e-139	0.507394
Mical2	0.534	0.077	1.46214e-139	0.659318
Socs2	0.864	0.317	1.24386e-138	0.589615
Ostf1	0.771	0.725	1.98965e-138	-0.932464
Ext1	0.629	0.123	6.48596e-138	0.677281
Vamp5	0.807	0.234	1.5042e-137	1.0342
Slc1a3	0.462	0.051	2.43996e-137	0.601156
Sspn	0.582	0.106	3.98865e-137	0.621634
Myl9	0.505	0.07	4.8352e-137	0.722279
Fndc3b	0.82	0.243	6.97427e-137	0.834392
Sec31a	0.78	0.244	7.07639e-136	0.573687
Prrx1	0.624	0.143	9.16879e-136	0.57184
Meox1	0.811	0.247	1.07637e-135	1.26551
Kcnj15	0.301	0.009	1.1875e-135	0.586693
Pkd2	0.686	0.174	1.53258e-135	0.62281
Pfn1	0.967	0.942	4.47762e-135	-1.3687
Prkcdbp	0.978	0.436	9.64871e-135	0.823935
Arhgef40	0.668	0.168	1.0547e-134	0.574536
Rhoq	0.705	0.173	1.96314e-134	0.688598
Lama2	0.712	0.219	2.88789e-134	0.508044
Nenf	0.993	0.493	3.04419e-134	0.866955
Dclk1	0.637	0.128	5.07122e-134	0.792884
Gpr153	0.618	0.134	9.88608e-134	0.60071
Gm8730	0.989	0.773	1.03199e-133	0.960059
Mn1	0.582	0.129	1.08409e-133	0.522004
Ssbp2	0.695	0.186	1.4189e-133	0.574103
Lgals3	0.222	0.403	2.88678e-133	-2.91653
F2r	0.697	0.206	3.84984e-133	0.517574
Pkm	0.895	0.777	1.07057e-132	-1.1306
Hdlbp	0.914	0.348	2.54447e-132	0.782102
Sod3	0.796	0.254	5.34968e-132	0.754397
H2-Aa	0.389	0.371	7.66157e-132	-3.24387
Rgs4	0.319	0.022	1.26847e-131	0.513949
Nbl1	0.741	0.21	1.547e-131	0.779296
Col4a5	0.44	0.051	1.82044e-131	0.511028
Map1lc3a	0.919	0.392	2.63615e-131	0.507623
Srpx	0.532	0.087	4.06406e-131	0.652308
Ckap4	0.851	0.282	8.02328e-131	0.845209
Nnmt	0.697	0.19	8.68631e-131	0.616799
Eng	0.633	0.403	9.9667e-131	-0.772965
Rap1b	0.774	0.724	5.19896e-130	-0.950261
Fibin	0.765	0.217	1.25463e-129	1.1845
Fam198b	0.769	0.213	1.28044e-129	0.956802
Serf2	1	0.962	1.80427e-129	0.755776
Tns3	0.655	0.139	2.33362e-129	0.762461
Acta2	0.514	0.067	2.36823e-129	1.36648
Tceal8	0.87	0.308	2.39041e-129	0.739361
Svep1	0.556	0.093	3.06624e-129	0.754759
Col4a2	0.919	0.359	6.50097e-129	0.972234
Smarca2	0.67	0.187	7.30011e-129	0.502476
Cfh	0.919	0.369	8.0753e-129	0.780269
Hnrnpf	0.884	0.828	1.0916e-128	-0.884898
Fxyd5	0.651	0.71	1.12523e-128	-1.52096
Golim4	0.749	0.23	1.96972e-128	0.59508
Foxp2	0.514	0.079	2.12143e-128	0.611244
Calu	0.923	0.371	2.7056e-128	0.72226
Cald1	0.965	0.43	2.84449e-128	0.985641
Cotl1	0.358	0.537	3.82358e-128	-1.99189
Cfl1	0.98	0.951	1.06244e-127	-1.07792
Igf1	0.793	0.239	1.0643e-127	0.929756
Tmem263	0.589	0.135	1.08459e-127	0.521056
Cnn3	0.881	0.36	1.1823e-127	0.521475
Rap1a	0.782	0.721	1.83073e-127	-0.787238
Rpl13a-ps1	0.749	0.228	2.39428e-127	0.590531
Abi3bp	0.659	0.161	2.53342e-127	1.10569
Ndufa4l2	0.716	0.208	2.64368e-127	0.595443
Ifi30	0.503	0.388	3.60752e-127	-0.998581
Hmgn3	0.662	0.184	8.09799e-127	0.516263
Fth1	1	0.993	1.52373e-126	-1.72061
Rgs10	0.631	0.427	2.96209e-126	-0.539766
Ftl1	1	0.994	5.76695e-126	-1.33243
Spats2l	0.508	0.078	8.86691e-126	0.622791
Calm1	0.969	0.959	9.59004e-126	-1.23553
Lix1l	0.646	0.163	1.83463e-125	0.574543
Cyth3	0.767	0.263	5.07622e-125	0.511688
Rps12-ps3	1	0.812	1.45462e-124	0.874545
Rbms2	0.721	0.222	1.59911e-124	0.517125
Taldo1	0.631	0.631	7.0893e-124	-1.0254
Gpx1	0.947	0.794	7.18203e-124	-1.00171
Eif4a1	0.927	0.859	8.85058e-124	-0.923381
Igfbp4	0.963	0.434	2.1201e-123	1.03301
Lhfpl2	0.523	0.08	3.601e-123	0.674057
Aprt	0.719	0.499	1.17148e-122	-0.530112
Col9a2	0.275	0.008	2.02478e-122	0.578697
Hmgn1	0.978	0.486	2.74637e-122	0.893596
Clmp	0.688	0.176	4.73601e-122	0.753177
Tspan3	0.868	0.334	1.17372e-121	0.628675
Ltbp4	0.958	0.467	1.86466e-121	0.501654
Hcfc1r1	0.945	0.479	5.60722e-121	0.985202
C1qb	0.27	0.308	9.85271e-121	-2.88108
Rpl7a-ps5	0.908	0.364	1.14118e-120	0.854049
Cnpy2	0.949	0.433	1.53725e-120	0.86698
Gstm1	0.495	0.529	1.54966e-120	-1.67298
Golgb1	0.868	0.335	2.57257e-120	0.617376
Nupr1	0.916	0.401	6.5876e-120	1.19665
Hnrnpa3	0.846	0.698	1.14754e-119	-0.572532
Tnfrsf12a	0.644	0.147	5.97041e-119	0.962564
Plin2	0.42	0.444	6.47447e-119	-1.19843
Coro1a	0.116	0.471	7.17976e-119	-2.37939
P4hb	0.967	0.496	4.53203e-118	0.920125
Nrp1	0.725	0.545	5.22552e-118	-0.981155
C1qa	0.262	0.27	1.31539e-117	-2.70614
Gm2a	0.523	0.505	1.74556e-117	-1.1646
Pitpna	0.543	0.51	2.49359e-117	-0.84317
Actb	0.998	0.998	2.61133e-117	-1.92027
Id3	0.98	0.554	1.61198e-116	1.1155
Loxl2	0.629	0.162	2.87091e-116	0.624597
Nedd9	0.602	0.158	4.25784e-116	0.503735
Rps12	1	0.978	5.33312e-116	0.655274
Hspb1	0.831	0.483	6.06612e-116	-0.513631
Wbp5	0.949	0.478	2.236e-115	0.976791
Rps8	1	0.997	3.15351e-115	0.566057
Adamts10	0.578	0.131	5.05462e-115	0.562582
Fabp5	0.516	0.482	7.59956e-115	-1.84031
Pofut2	0.789	0.271	4.18466e-114	0.619937
Capzb	0.846	0.76	4.88043e-114	-0.75012
Nav1	0.807	0.302	1.03457e-113	0.568889
Praf2	0.637	0.165	1.93408e-113	0.583569
Laptm5	0.09	0.439	8.38714e-113	-1.987
Olfml3	0.837	0.314	1.10363e-112	0.754408
Ncam1	0.281	0.012	1.57172e-112	0.509308
Sulf2	0.681	0.184	1.63314e-112	0.802608
Usp9x	0.657	0.188	3.76716e-112	0.516767
Aldh2	0.69	0.625	4.31927e-112	-0.846838
Btg1	0.811	0.794	5.52264e-112	-1.53629
Cd53	0.092	0.445	7.1593e-112	-1.9413
Atp6v0b	0.771	0.66	8.93162e-112	-0.644673
Thbs4	0.279	0.013	1.47621e-111	1.7629
Slc25a5	0.798	0.748	2.11296e-111	-0.927887
Gadd45b	0.789	0.261	2.38263e-111	0.957853
Alox5ap	0.11	0.38	2.6214e-111	-2.18718
H2-Eb1	0.314	0.32	8.17169e-111	-2.96384
Matn2	0.681	0.2	1.29958e-110	0.673912
Pld3	0.716	0.23	1.05537e-109	0.560794
Efhd2	0.308	0.429	1.70388e-109	-1.17701
Fam101b	0.719	0.212	4.18326e-109	1.14477
Arl6ip1	0.677	0.646	5.1643e-109	-0.784653
Tuba1b	0.842	0.787	9.75405e-109	-0.915759
Snhg6	0.719	0.236	9.76134e-109	0.533725
Apoe	0.98	0.869	1.90322e-108	-2.48501
Dazap2	0.613	0.512	4.49038e-108	-0.536081
Fam96a	0.534	0.416	5.78711e-108	-0.535096
Arhgdia	0.897	0.756	1.57104e-107	-0.523936
Hn1	0.679	0.617	2.17107e-107	-0.712499
Sat1	0.826	0.718	3.45695e-107	-0.892011
Rbm8a	0.684	0.57	3.73177e-107	-0.536835
Ptov1	0.831	0.32	1.84948e-106	0.633377
Arpc2	0.927	0.876	2.13322e-106	-0.990729
Unc93b1	0.253	0.417	2.67218e-106	-1.20389
Snx5	0.479	0.441	3.94599e-106	-0.724935
Grn	0.862	0.617	7.82215e-106	-0.553633
Serpine2	0.771	0.285	1.09763e-105	1.17756
Adamtsl2	0.497	0.09	1.20324e-105	1.12276
Wfdc17	0.191	0.388	2.52113e-105	-2.70503
Erlec1	0.642	0.192	2.97682e-105	0.502426
Gas6	0.897	0.398	3.38207e-105	1.06181
Col4a1	0.927	0.426	4.27154e-105	0.821912
Rplp0	1	0.99	7.84035e-105	0.584699
Stx7	0.459	0.429	1.06582e-104	-0.606993
Ppib	0.998	0.817	5.46281e-104	0.812447
Sparcl1	0.712	0.521	6.7706e-104	-0.847896
Ctsz	0.919	0.718	7.03157e-104	-0.561387
Psme1	0.633	0.589	1.69867e-103	-0.748849
Cdc42	0.958	0.894	2.98647e-103	-0.743242
Rab5c	0.582	0.552	3.36847e-103	-0.691963
Clic1	0.93	0.851	8.513e-103	-0.765264
Psme2	0.736	0.62	9.54653e-103	-0.602688
Tpm3	0.857	0.766	1.06516e-102	-0.712864
Atp6v1e1	0.604	0.495	2.35178e-102	-0.50154
Ctsa	0.611	0.467	3.23098e-102	-0.568363
Msn	0.741	0.71	1.00388e-101	-0.861422
Pycard	0.464	0.37	1.24677e-101	-0.618733
Hprt	0.457	0.452	1.32018e-101	-0.637125
Nfic	0.921	0.428	1.42326e-101	0.687338
Cd63	0.982	0.542	2.36452e-101	0.658071
Msrb1	0.477	0.44	2.55432e-101	-1.08397
Golga7	0.87	0.363	2.67765e-101	0.733688
Wls	0.763	0.263	3.46771e-101	0.67836
Ptpn18	0.13	0.448	8.67493e-101	-1.61165
Lmo4	0.846	0.344	1.19964e-100	0.745615
Ctsc	0.116	0.407	1.36976e-100	-2.55898
Fam49b	0.209	0.422	2.04275e-100	-1.3637
Cmtm7	0.563	0.466	2.99241e-100	-0.553924
Eno1	0.705	0.629	3.06987e-100	-0.92495
Siva1	0.756	0.279	9.62824e-100	0.532783
Cox17	0.558	0.565	1.7906e-99	-0.766328
Cpxm1	0.51	0.106	1.98661e-99	0.653935
Rab31	0.563	0.141	4.39567e-99	0.527863
Nme1	0.721	0.588	5.22467e-99	-0.568253
Ramp2	0.514	0.434	1.50779e-98	-0.974707
Kdelr1	0.934	0.458	2.30507e-98	0.580859
Vamp8	0.716	0.582	3.13205e-98	-0.518429
Sh3bgrl3	0.978	0.869	3.26334e-98	-0.905763
Eef1b2	0.989	0.81	5.72171e-98	0.744883
Tkt	0.538	0.499	8.64928e-98	-0.622917
Ier5	0.607	0.614	1.10297e-97	-0.989166
Sept11	0.802	0.314	1.15697e-97	0.64516
H2afz	0.932	0.772	1.52778e-97	-0.777083
Anp32a	0.727	0.609	2.17889e-97	-0.630538
C1qc	0.196	0.26	3.26327e-97	-2.42242
Hnrnpm	0.582	0.528	5.71771e-97	-0.625562
Ifngr1	0.64	0.687	7.54747e-97	-0.96813
Tgfbi	0.327	0.457	7.90547e-97	-1.98478
Tpm1	0.853	0.372	8.85457e-97	0.501231
Psmb8	0.49	0.611	1.3857e-96	-1.11457
Sypl	0.538	0.447	3.41599e-96	-0.567652
Ctsd	0.987	0.734	6.30485e-96	-0.590281
Col15a1	0.791	0.311	1.21021e-95	1.13801
Dnpep	0.738	0.269	1.33481e-95	0.558891
Gsn	0.991	0.803	1.59563e-95	-2.05265
H2-K1	0.877	0.869	2.49887e-95	-1.09471
Cd74	0.319	0.457	3.68783e-95	-4.59139
Sub1	0.936	0.775	4.14509e-95	-0.634561
Actr2	0.549	0.536	2.00297e-94	-0.7671
Gngt2	0.108	0.462	5.10523e-94	-1.66317
Surf4	0.82	0.349	6.25676e-94	0.506569
Aldoa	0.916	0.832	8.57127e-94	-0.820803
Fam195b	0.916	0.446	9.66188e-94	0.564074
Cd47	0.842	0.744	1.22586e-93	-0.603383
Metrnl	0.44	0.365	2.564e-93	-0.712179
Mef2c	0.613	0.446	5.71316e-93	-0.610933
Aplp2	0.708	0.541	6.05929e-93	-0.61465
Dok1	0.618	0.17	7.23559e-93	0.637821
Atox1	0.967	0.821	8.37792e-93	-0.599463
Rab11a	0.675	0.562	8.54141e-93	-0.584052
Lrp1	0.945	0.49	9.09636e-93	0.666496
Vasp	0.521	0.502	9.27723e-93	-0.741051
Cav1	0.251	0.315	1.55558e-92	-1.8488
Slc25a4	0.989	0.637	1.73488e-92	0.691255
Mcl1	0.677	0.544	3.23611e-92	-0.587172
Heg1	0.758	0.297	5.2183e-92	0.589856
Serpina3n	0.415	0.066	7.4063e-92	0.861385
Slc3a2	0.578	0.471	1.41328e-91	-0.558589
Ecscr	0.275	0.221	1.71368e-91	-0.895991
Vcan	0.677	0.246	1.95672e-91	0.521985
Arhgap31	0.42	0.329	2.09221e-91	-0.750532
Ucp2	0.125	0.432	3.73297e-91	-1.44606
Nck1	0.376	0.326	2.56921e-90	-0.638841
Tmbim6	0.914	0.805	3.29311e-90	-0.612647
Gltp	0.459	0.434	4.34824e-90	-0.600195
Shisa5	0.903	0.774	7.79369e-90	-0.707306
Lmna	0.932	0.477	1.98116e-89	0.608032
Snrk	0.396	0.314	2.59662e-89	-0.546126
Cd151	0.556	0.421	7.02964e-89	-0.538218
Capg	0.659	0.555	8.77366e-89	-0.787215
Mapk3	0.499	0.434	2.51862e-88	-0.572613
Gpi1	0.662	0.6	3.05364e-88	-0.631122
Ly6e	0.93	0.905	3.41898e-88	-1.21141
Hist1h2bc	0.774	0.319	4.62575e-88	0.547016
H1f0	0.84	0.364	8.92242e-88	0.736746
Tnfaip8	0.349	0.349	1.44221e-87	-0.646045
Raph1	0.695	0.251	1.48133e-87	0.547415
Il10rb	0.251	0.43	2.49287e-87	-0.955248
Gnai2	0.963	0.871	3.43353e-87	-0.657241
Grb2	0.407	0.386	6.41687e-87	-0.560257
Stc2	0.345	0.041	6.99884e-87	0.585325
Gusb	0.418	0.387	9.44636e-87	-0.566967
Hspa8	0.993	0.975	1.57605e-86	-1.00486
Arf4	0.976	0.619	2.21282e-86	0.747021
Lcp1	0.055	0.403	5.88843e-86	-1.66372
Atp1a1	0.462	0.439	8.55169e-86	-0.64904
Serpine1	0.508	0.13	8.70766e-86	0.660554
Rps29	1	0.999	8.73507e-86	-0.68808
Srsf3	0.798	0.721	1.43239e-85	-0.611211
Ssr2	0.945	0.533	6.88221e-85	0.750425
Hmgb2	0.435	0.387	7.13805e-85	-0.804638
Nfe2l2	0.514	0.518	9.06041e-85	-0.706559
Atp2b1	0.609	0.497	1.09737e-84	-0.518482
Adam15	0.486	0.379	1.20511e-84	-0.557919
Ets1	0.292	0.307	1.50775e-84	-0.852299
Tmsb4x	1	1	3.40574e-84	-1.29629
Tubb4b	0.466	0.503	4.70393e-84	-0.981408
Rrbp1	0.989	0.727	5.09002e-84	0.759488
Ptpn1	0.462	0.417	7.51889e-84	-0.671002
Dab2	0.316	0.356	9.25425e-84	-1.06817
Ppp1r2	0.673	0.54	9.74185e-84	-0.589759
Tmod3	0.462	0.395	1.25634e-83	-0.544847
Mat2a	0.688	0.59	1.30968e-83	-0.614243
Slc9a3r2	0.301	0.341	1.51958e-83	-1.33589
Itih5	0.552	0.144	2.27996e-83	0.708213
Id1	0.396	0.302	2.77243e-83	-1.06806
Ehd1	0.451	0.424	6.74752e-83	-0.692609
Tpst2	0.367	0.355	7.40342e-83	-0.559047
M6pr	0.371	0.41	8.71873e-83	-0.650753
Rpl23a-ps3	0.998	0.872	2.99232e-82	0.568289
Rac2	0.079	0.412	1.1357e-81	-1.68578
Cndp2	0.345	0.355	1.38809e-81	-0.63511
Atp5b	0.899	0.842	1.68491e-81	-0.667743
Card19	0.435	0.39	1.8264e-81	-0.608057
Snx2	0.431	0.407	3.90279e-81	-0.619813
Ptp4a3	0.369	0.346	5.41678e-81	-0.791644
BC028528	0.338	0.297	6.08167e-81	-0.596577
Rsrp1	0.958	0.858	9.06358e-81	-0.582756
Psma7	0.884	0.78	1.29657e-80	-0.551091
Ms4a6c	0.051	0.34	1.54813e-80	-1.97327
Kdelr2	0.888	0.446	2.17339e-80	0.554903
Rnh1	0.631	0.529	2.7484e-80	-0.562929
Cdk2ap2	0.604	0.546	3.33276e-80	-0.728784
Ergic3	0.901	0.46	4.11943e-80	0.565303
Ptms	0.98	0.597	4.83879e-80	0.62685
Uba52	0.587	0.551	2.87676e-79	-0.723276
Atp6ap1	0.516	0.493	4.09799e-79	-0.556881
Lst1	0.105	0.351	4.18777e-79	-1.74372
Rpl9-ps6	0.982	0.691	9.88087e-79	0.637916
Dnajc8	0.609	0.528	1.03444e-78	-0.513121
Bhlhe41	0.376	0.062	2.18019e-78	0.524934
Morf4l2	0.936	0.516	5.58897e-78	0.553371
Nmt1	0.415	0.446	7.88393e-78	-0.646982
Zfp36l2	0.404	0.502	2.15434e-77	-0.931669
Srsf2	0.789	0.72	2.53306e-77	-0.630037
Ap3s1	0.875	0.437	3.84572e-77	0.595702
Timp3	0.833	0.401	4.46426e-77	1.02889
Atp1b3	0.488	0.439	7.07963e-77	-0.529612
Rhog	0.358	0.427	8.04788e-77	-0.692763
Ninj1	0.422	0.36	1.79969e-76	-0.684456
Fli1	0.284	0.3	2.69112e-76	-0.633686
Ly6c1	0.319	0.452	5.53423e-76	-2.53323
Mgll	0.264	0.297	9.05198e-76	-1.63951
Tpd52	0.154	0.365	1.3771e-75	-1.26959
Syngr2	0.431	0.386	2.7654e-75	-0.546049
Lrrfip1	0.367	0.329	4.55228e-75	-0.5108
Arl1	0.919	0.501	8.76686e-75	0.534741
Rnf130	0.286	0.397	1.82402e-74	-0.760029
Hsp90aa1	0.901	0.753	3.03051e-74	-0.536629
Srsf7	0.516	0.471	5.00226e-74	-0.51712
Pid1	0.462	0.458	7.49946e-74	-0.8692
Spi1	0.04	0.352	9.02008e-74	-1.55946
Cd68	0.059	0.334	1.33457e-73	-1.7188
Krtcap2	0.993	0.727	3.43336e-73	0.615508
Sft2d1	0.319	0.335	6.02347e-73	-0.536514
Fcgr3	0.053	0.334	6.6717e-72	-1.79043
Lyn	0.075	0.37	1.94276e-71	-1.14345
Tmem167	0.938	0.54	2.23456e-71	0.523606
Clec3b	0.363	0.312	2.31954e-71	-1.40534
Runx1	0.538	0.166	2.70009e-71	0.567175
Rnpep	0.332	0.326	8.70924e-71	-0.502921
Tsc22d3	0.565	0.537	8.77362e-70	-0.765366
Vim	1	0.901	3.24442e-69	0.577773
S100a4	0.316	0.417	3.48935e-69	-1.65118
Hmox1	0.231	0.314	3.6147e-69	-2.05811
Dnaja1	0.877	0.778	4.4894e-69	-0.652963
Ddx5	0.969	0.927	6.11241e-69	-0.685354
Bsg	0.996	0.748	1.36688e-68	0.551318
Ccl6	0.079	0.357	2.07118e-68	-3.07755
Dpep1	0.413	0.279	2.1652e-68	-0.821365
Cap1	0.277	0.294	4.34996e-68	-0.516456
Ms4a6d	0.048	0.293	5.658e-68	-1.60011
Ubl3	0.534	0.496	9.09011e-68	-0.502423
Dusp3	0.453	0.443	1.5819e-67	-0.766408
Pf4	0.16	0.288	2.90285e-67	-2.63409
Limd2	0.242	0.313	3.38275e-67	-0.975377
Tmed5	0.376	0.428	4.32537e-66	-0.675092
Fyb	0.092	0.331	6.03368e-66	-1.27298
Ssh2	0.338	0.332	9.79172e-66	-0.513817
Psmb10	0.44	0.467	1.44473e-65	-0.649806
Aif1	0.059	0.275	1.82695e-65	-1.41388
Stk17b	0.204	0.329	4.93236e-65	-0.97091
Gapdh	0.974	0.887	5.16731e-65	-0.680675
Slc6a6	0.301	0.395	9.42099e-65	-1.07378
Slfn2	0.095	0.403	1.11533e-64	-1.42859
Sec11c	0.413	0.409	1.50876e-64	-0.552505
Ier3	0.64	0.429	1.61827e-64	-0.573879
Tspan13	0.095	0.389	1.91727e-64	-1.94305
Txnip	0.668	0.548	4.06531e-64	-0.566247
Cd36	0.147	0.375	1.73681e-63	-2.397
Klf6	0.666	0.658	1.97339e-63	-0.875223
Ccr2	0.055	0.29	2.46479e-63	-1.7535
Adgre5	0.327	0.314	4.18288e-63	-0.529238
Lilrb4a	0.024	0.306	5.3908e-63	-1.56138
Vsir	0.114	0.341	7.99365e-63	-0.964503
Smpdl3a	0.554	0.493	9.54197e-63	-0.62539
Mgst1	0.448	0.371	1.14333e-62	-0.585194
Sepp1	0.954	0.775	1.40545e-62	-0.571883
Marcks	0.958	0.631	1.96833e-62	0.695346
Itpkb	0.218	0.292	3.98096e-62	-0.82205
Rgcc	0.099	0.302	6.48864e-62	-1.61456
Gm9493	0.991	0.72	7.61942e-62	0.506722
Arpc1b	0.987	0.925	7.94332e-62	-0.673327
2700060E02Rik	0.967	0.643	1.05908e-61	0.575733
Sdpr	0.171	0.321	3.69335e-61	-2.05009
Mafb	0.334	0.394	4.84554e-61	-1.28491
Gpsm3	0.391	0.41	8.27593e-61	-0.590673
Cd14	0.066	0.297	9.2804e-61	-1.82879
Sgk1	0.305	0.352	1.3694e-60	-0.971094
Cst6	0.314	0.059	2.08421e-60	0.513647
Samhd1	0.319	0.367	2.26086e-60	-0.756856
Hcls1	0.035	0.316	2.71691e-60	-1.02327
AW112010	0.174	0.429	3.32092e-60	-1.7071
Cd93	0.042	0.325	3.71747e-60	-1.30214
Ptprc	0.059	0.347	1.49776e-59	-1.2738
Tubb6	0.422	0.377	2.1274e-59	-0.514318
Pim1	0.281	0.392	2.42934e-59	-1.14855
Ptpn6	0.04	0.293	3.14957e-59	-1.03322
Rpl6l	0.982	0.687	3.90557e-59	0.524047
Prcp	0.316	0.317	4.33553e-59	-0.525806
Ms4a6b	0.035	0.309	4.55768e-59	-1.3617
Skap2	0.141	0.31	5.63132e-59	-0.846175
Sept4	0.273	0.26	9.09638e-59	-0.806449
Ubc	0.982	0.927	1.99689e-58	-0.648841
Ehd4	0.145	0.313	2.77565e-58	-0.863747
H2-DMa	0.088	0.291	3.37907e-58	-1.31107
Vwa1	0.301	0.345	3.98737e-58	-0.78047
Sdf2l1	0.292	0.37	4.55314e-58	-0.835996
Actg1	0.998	0.985	4.99363e-58	-0.872831
Pecam1	0.086	0.268	1.40811e-57	-1.37156
Gmfg	0.053	0.337	1.6626e-57	-1.23877
Mpeg1	0.044	0.287	1.57283e-56	-1.21327
Tm6sf1	0.029	0.304	1.89866e-56	-0.989126
Tgm2	0.16	0.363	2.84256e-56	-1.04183
Ly86	0.026	0.285	3.45551e-56	-1.27915
Glul	0.284	0.441	4.50124e-56	-0.945927
Ikbkb	0.273	0.301	3.1764e-55	-0.500693
Csf1r	0.035	0.29	4.33564e-55	-1.27101
mt-Nd2	1	0.945	6.68168e-55	-0.541877
Cybb	0.042	0.273	8.68058e-55	-1.18369
Gimap6	0.09	0.299	2.37116e-54	-1.38082
Ldha	0.923	0.798	3.45582e-54	-0.531137
Pld4	0.046	0.281	8.52951e-54	-1.12853
Cd44	0.224	0.291	8.62584e-54	-0.788156
Rgs2	0.099	0.356	1.02277e-53	-1.44704
C5ar1	0.018	0.285	2.15602e-53	-1.72697
Ccl9	0.127	0.329	3.85763e-53	-2.29931
Plekho1	0.127	0.252	7.57683e-53	-0.631
Gsr	0.2	0.272	1.55085e-52	-0.832271
Itgb2	0.051	0.299	2.23831e-52	-1.11703
Fam111a	0.207	0.313	2.6149e-52	-0.632889
Dusp1	0.701	0.756	3.52265e-52	-1.19012
Nfkbia	0.703	0.656	3.56564e-52	-0.856851
G0s2	0.378	0.305	3.64846e-52	-0.874819
Gpihbp1	0.156	0.313	4.57051e-52	-2.17109
Egfl7	0.077	0.274	9.33176e-52	-1.82018
Pltp	0.251	0.284	1.20733e-51	-0.684486
Lims2	0.134	0.296	2.75462e-51	-1.18687
Npm1	0.993	0.815	2.92172e-51	0.510118
AF251705	0.02	0.28	3.06094e-51	-1.22356
Cd48	0.042	0.291	3.69053e-51	-1.03556
Itm2b	1	0.979	6.02846e-51	-0.710485
Ncf2	0.029	0.27	9.38136e-51	-0.943387
Esam	0.077	0.262	1.26058e-50	-1.61715
Twf2	0.196	0.299	3.36909e-50	-0.575878
Prdx1	0.985	0.898	3.40184e-50	-0.543657
Tgfb1	0.552	0.507	5.66396e-50	-0.550127
Cited2	0.29	0.298	5.78812e-50	-0.581709
Psmb9	0.211	0.3	7.00468e-50	-0.654908
H3f3b	1	0.986	1.11173e-49	-0.625511
Apobec3	0.226	0.284	1.60863e-49	-0.692144
Selplg	0.022	0.281	6.0219e-49	-1.04588
Plek	0.046	0.275	8.81249e-49	-1.06633
Icam2	0.055	0.277	1.10495e-48	-1.5012
Sipa1	0.22	0.314	1.15306e-48	-0.602175
B2m	1	0.992	3.16073e-48	-0.708316
Fcgr2b	0.044	0.287	8.51071e-48	-1.20808
Nrros	0.026	0.259	1.41565e-47	-0.859542
Amd1	0.18	0.274	1.86739e-47	-0.658256
Spp1	0.27	0.308	5.73633e-47	-3.03081
Fam105a	0.033	0.269	6.94301e-47	-0.935737
Sirpa	0.145	0.296	1.19661e-46	-0.743514
Cxcl12	0.492	0.342	2.91654e-46	-0.998092
Rps28	1	0.99	2.22348e-43	-0.55317
Plac8	0.319	0.27	2.63338e-43	-1.47068
Il1b	0.112	0.291	1.95661e-42	-2.33243
Cxcl2	0.163	0.275	3.23698e-42	-2.54095
Ddx21	0.268	0.327	6.11014e-42	-0.561012
Aqp1	0.099	0.252	1.70479e-41	-2.1051
AI662270	0.024	0.252	3.97377e-41	-0.845411
Ly6a	0.527	0.602	4.15828e-41	-1.33571
Ablim1	0.22	0.271	4.90222e-41	-0.588658
Lmo2	0.101	0.28	4.695e-40	-0.716607
Ccnd1	0.152	0.333	5.48347e-40	-1.01505
Egr1	0.851	0.531	1.3909e-39	0.569857
Sp100	0.33	0.36	3.36078e-39	-0.559238
Irf5	0.07	0.258	1.32527e-37	-0.724213
Orai1	0.178	0.273	1.62239e-37	-0.537332
Irf8	0.174	0.322	7.51981e-37	-0.877695
Cdkn1c	0.284	0.227	7.17707e-36	-0.530427
Zfp36	0.576	0.586	5.12406e-35	-0.721938
Thbd	0.268	0.288	7.62789e-34	-0.606049
Junb	0.901	0.857	9.56039e-34	-0.729287
Arl4c	0.125	0.266	4.00226e-33	-0.68134
Hspa1a	0.255	0.38	5.0635e-33	-1.5687
Tuba1c	0.176	0.258	5.47429e-33	-0.576412
Socs3	0.444	0.437	5.84871e-33	-0.683842
Gda	0.147	0.302	1.42538e-32	-0.862409
Ccl2	0.079	0.285	1.08589e-30	-2.30715
S100a8	0.266	0.35	1.97674e-29	-2.65414
AI607873	0.068	0.258	6.46915e-24	-0.701066
Trf	0.268	0.284	4.86505e-23	-0.609668
Ifi204	0.185	0.26	3.65174e-22	-0.613777
Atf3	0.246	0.341	3.64858e-21	-0.916006
Btg2	0.734	0.731	1.10115e-17	-0.576809
S100a9	0.202	0.26	1.23306e-17	-2.27466
Cdkn1a	0.409	0.495	2.31315e-06	-0.518387

## Sheet: EC3 vs rest
Gene	pct.1	pct.2	p_val_adj	Log2FoldChange
Fabp4	0.983	0.677	2.3803e-241	2.11517
Egfl7	0.956	0.246	2.41551e-226	1.81082
Sdpr	0.951	0.295	1.0916e-220	2.20659
Cav1	0.963	0.292	8.88053e-217	1.76427
Emcn	0.901	0.208	1.19698e-209	2.03176
Gng11	0.988	0.511	5.68774e-201	1.8811
Vwf	0.414	0.022	6.64178e-198	2.06622
Ecscr	0.867	0.203	1.60801e-185	1.7981
Calcrl	0.552	0.111	5.24275e-185	1.69252
Plvap	0.328	0.03	1.68983e-179	2.03891
Pecam1	0.877	0.243	1.86826e-179	1.80498
Flt1	0.815	0.177	2.51264e-173	1.87477
Aqp1	0.842	0.228	2.53885e-173	2.16334
Ptprb	0.776	0.162	3.15791e-170	1.89714
Cdh5	0.86	0.22	1.22069e-163	1.49077
Ly6c1	0.904	0.433	3.01309e-163	1.84511
Bcam	0.734	0.156	1.23304e-157	1.88669
Car8	0.7	0.142	2.90484e-156	1.86933
AU021092	0.525	0.052	1.33906e-154	1.84086
Icam2	0.867	0.251	1.34641e-153	1.54764
Ramp2	0.901	0.422	1.81992e-149	1.63896
Adgrf5	0.729	0.145	1.24866e-146	1.47092
Ctla2a	0.754	0.22	6.16058e-144	2.1412
Cd36	0.887	0.351	8.73198e-141	1.51885
Esam	0.83	0.238	3.48872e-140	1.43725
Adgrl4	0.7	0.139	7.60146e-137	1.60497
Ly6a	0.926	0.589	1.58268e-136	1.77515
Slc9a3r2	0.872	0.323	1.10903e-135	1.50592
Podxl	0.672	0.129	1.95786e-133	1.60057
Ptgs1	0.463	0.064	1.65114e-132	1.45536
Eng	0.862	0.396	1.62352e-129	1.60268
Cd9	0.924	0.61	6.74535e-129	1.54747
Aplp2	0.865	0.536	3.44479e-125	1.37292
Rdx	0.771	0.52	6.86003e-123	1.30329
Cd200	0.815	0.268	2.30314e-122	1.49334
Tspan7	0.714	0.188	2.06616e-121	1.6304
Mmrn2	0.658	0.136	4.03358e-120	1.38836
Ndrg1	0.648	0.2	7.85304e-117	1.49452
Pdlim1	0.741	0.362	7.71152e-116	1.40317
Ftl1	0.985	0.994	1.98959e-115	-1.83434
Fmo1	0.571	0.143	9.16968e-115	1.47627
Mgll	0.793	0.28	1.20607e-111	1.08189
Tinagl1	0.695	0.174	2.49359e-111	1.62269
Aplnr	0.623	0.129	6.59113e-111	1.70535
Lgals1	0.52	0.808	4.18456e-110	-2.15387
Fabp5	0.889	0.471	4.56634e-110	1.50214
Adam15	0.719	0.372	5.82328e-109	1.34854
Kank3	0.685	0.175	2.23583e-108	1.31375
Tspan13	0.879	0.363	3.53266e-107	1.20835
Myct1	0.672	0.166	7.00409e-105	1.26992
Stmn2	0.49	0.074	4.79924e-104	1.62452
Thbd	0.665	0.275	6.42465e-104	1.4876
Lsp1	0.116	0.626	3.25726e-103	-1.8611
Tm4sf1	0.921	0.499	1.50184e-102	1.66362
Tie1	0.611	0.131	2.29871e-101	1.28496
Ephb4	0.485	0.083	2.92047e-99	1.21311
Tshz2	0.677	0.223	2.08437e-98	1.38033
Crip2	0.953	0.545	6.20408e-98	1.07632
Ctnnb1	0.788	0.436	1.01715e-97	1.20141
Ptrf	0.842	0.43	1.26063e-97	1.33587
Vcam1	0.478	0.199	2.25802e-97	1.68217
Smagp	0.628	0.178	2.8231e-97	1.29392
Cav2	0.727	0.23	6.36709e-96	1.28661
Gpihbp1	0.778	0.293	9.77123e-96	1.15663
Cd59a	0.419	0.064	4.70873e-95	1.25061
Rasip1	0.611	0.148	3.05063e-94	1.09731
Celf2	0.034	0.513	6.42681e-94	-1.27825
Lrp1	0.044	0.52	1.51222e-92	-1.53518
2200002D01Rik	0.33	0.04	1.8195e-92	1.16085
Tgm2	0.719	0.345	4.34427e-91	1.29425
Lyz2	0.49	0.664	3.20436e-89	-3.92653
Hspb1	0.867	0.483	1.8295e-88	1.36918
Bsg	0.865	0.753	2.99263e-88	1.01378
Nrp1	0.877	0.541	5.40197e-86	1.14113
Grrp1	0.426	0.067	1.32952e-85	1.33784
Cd52	0.143	0.535	8.24663e-84	-2.94626
Rab11a	0.793	0.559	8.36826e-83	1.00963
Kdr	0.611	0.191	2.97215e-82	0.818092
Mt1	0.116	0.563	5.89465e-82	-2.11745
Cpe	0.347	0.082	7.58919e-82	1.43816
Gsn	0.687	0.813	2.85027e-81	-3.25891
Palm	0.456	0.204	2.02268e-80	1.08215
Clec14a	0.505	0.105	2.02281e-80	1.22711
Ndufa8	0.768	0.561	2.28558e-80	0.959521
Cyyr1	0.549	0.134	3.32927e-80	1.03834
Cdh13	0.515	0.109	3.70169e-80	1.15561
Cd151	0.764	0.415	1.12436e-78	1.10416
Ctss	0.135	0.483	1.83196e-78	-3.19155
Klk8	0.468	0.096	2.46765e-78	1.26487
Palmd	0.507	0.112	2.56593e-77	1.0231
Id3	0.901	0.558	2.71206e-77	1.1413
Hmcn1	0.286	0.034	3.43168e-77	1.03364
Jam2	0.633	0.232	8.59515e-77	1.23105
Coro1a	0.076	0.471	9.21428e-77	-2.27808
Meox2	0.525	0.152	1.22787e-75	1.33564
Fth1	0.983	0.993	1.48234e-75	-1.48766
Fkbp1a	0.921	0.782	2.65916e-75	0.93927
Sptbn1	0.919	0.558	4.53966e-75	1.00932
Laptm5	0.044	0.439	4.64741e-75	-1.95828
S100a16	0.857	0.477	5.21657e-75	1.01681
Nr2f2	0.387	0.081	5.65428e-75	1.10586
Tmem88	0.603	0.18	5.91974e-75	1.13673
Mall	0.379	0.054	8.75539e-75	1.01529
Fcer1g	0.182	0.48	1.13728e-74	-3.17747
Vegfc	0.382	0.08	4.84467e-74	1.20277
Tyrobp	0.217	0.487	1.21573e-73	-2.92774
Actn1	0.525	0.176	2.31709e-73	1.12174
Spint2	0.325	0.045	8.34271e-72	1.05554
Unc45b	0.515	0.124	1.25573e-71	1.03811
Elk3	0.675	0.308	1.75371e-71	1.07456
Ppia	0.995	0.991	8.26991e-71	0.594954
Zeb2	0.091	0.519	1.31191e-70	-1.33812
Pid1	0.062	0.471	8.83892e-70	-1.42927
Rasa4	0.298	0.08	5.25691e-69	1.00491
Bace2	0.3	0.098	2.91181e-68	0.858809
Cd53	0.076	0.444	1.10167e-67	-1.80927
Fmo2	0.414	0.127	1.82029e-67	1.25134
Gimap4	0.623	0.211	3.47762e-67	0.962422
Cstb	0.333	0.631	3.95988e-67	-1.69127
Epas1	0.601	0.216	5.74014e-67	1.0511
Npr1	0.377	0.075	1.3875e-66	0.992503
Dcn	0.594	0.616	1.75609e-65	-2.85285
Hyal2	0.426	0.107	2.20083e-65	1.00637
C1qtnf9	0.557	0.163	2.53604e-65	1.13659
Ece1	0.537	0.243	7.26763e-65	1.08464
Kitl	0.544	0.156	1.55426e-64	1.04887
Cotl1	0.224	0.541	1.35736e-63	-1.81627
Ly6e	0.975	0.903	3.01332e-63	0.778414
S100a4	0.067	0.424	1.2156e-62	-2.10127
Arhgap31	0.695	0.321	3.42473e-62	0.973187
Cd81	0.98	0.716	6.07015e-62	0.570562
Emp2	0.485	0.211	1.52809e-61	1.1026
Prcp	0.544	0.309	1.77348e-61	1.0152
Ctsc	0.059	0.408	4.95811e-61	-2.45804
Dnm3	0.337	0.063	5.22158e-61	0.996531
Adcy4	0.387	0.075	6.69108e-61	0.908302
Arhgef15	0.448	0.108	1.1506e-59	0.911933
Itgb1	0.815	0.622	1.3887e-59	0.898332
Cd93	0.68	0.304	2.49782e-59	1.10224
Abcg2	0.47	0.141	5.22994e-59	1.08285
Gngt2	0.803	0.439	6.19297e-59	0.943768
Heg1	0.579	0.304	3.69602e-58	1.04234
Rac2	0.059	0.411	3.7267e-58	-1.60411
Klf2	0.933	0.792	5.33719e-58	1.06847
Mustn1	0.337	0.067	6.17478e-58	0.97644
Ramp3	0.362	0.068	6.45988e-58	1.06633
Rgs10	0.071	0.445	1.65995e-57	-1.24317
Apold1	0.401	0.093	3.7688e-57	1.49404
Ifi30	0.057	0.403	5.49694e-56	-1.60122
Alox5ap	0.074	0.38	5.83982e-56	-2.05672
Gimap6	0.67	0.28	1.06937e-55	0.774195
Cd300lg	0.544	0.191	1.42794e-55	0.773435
Clec1a	0.419	0.099	4.59641e-55	0.890712
Tek	0.48	0.177	7.22298e-55	1.01333
Slc6a6	0.564	0.386	7.22917e-55	1.19035
Apbb1ip	0.022	0.35	1.26281e-54	-0.915382
Plpp1	0.677	0.346	2.28959e-54	1.0621
Nos3	0.315	0.051	2.46328e-54	0.825292
Apoe	0.85	0.874	3.63989e-54	-2.18636
Lgals3	0.118	0.405	7.93086e-54	-2.71735
1810011O10Rik	0.512	0.162	1.2217e-53	1.02976
Gm2a	0.17	0.516	1.34905e-53	-1.35259
Col3a1	0.229	0.465	6.92803e-53	-2.55686
Il6st	0.362	0.238	1.10748e-52	0.780859
Lims2	0.638	0.279	1.15864e-52	0.969706
Col1a2	0.128	0.405	1.567e-52	-2.51453
Rassf9	0.333	0.06	1.78949e-52	0.956107
Nck1	0.638	0.318	2.4513e-52	0.913797
Pde2a	0.377	0.088	6.50446e-52	0.940219
Ifi27l2a	0.451	0.736	6.61192e-52	-1.65626
Ms4a6c	0.03	0.339	1.08712e-51	-1.90357
Cyba	0.68	0.839	1.33344e-51	-1.13628
Col1a1	0.054	0.364	3.53439e-51	-2.53729
Itgb5	0.059	0.403	7.37982e-51	-0.981787
Cracr2b	0.411	0.109	1.61994e-50	0.891345
Tcf15	0.527	0.178	2.20131e-50	0.94527
Nrp2	0.51	0.191	2.92864e-50	1.04824
Gpx3	0.177	0.409	3.78664e-50	-2.14932
Lmo7	0.33	0.063	3.79234e-50	0.816758
Pfn1	0.84	0.946	5.02348e-50	-0.959895
Afap1l1	0.406	0.107	1.0372e-49	0.720188
Tgfbi	0.135	0.462	2.08713e-49	-1.98985
Arl4a	0.411	0.204	2.88932e-49	0.864603
Tspan12	0.433	0.128	4.59971e-49	0.86977
Hspa12b	0.406	0.106	5.0374e-49	0.90869
Fcgr3	0.032	0.333	5.70513e-49	-1.72248
Cxcl12	0.682	0.337	8.67717e-49	0.829213
Ctsb	0.776	0.813	9.19209e-49	-1.35245
Tmem255b	0.308	0.056	1.08043e-48	0.816434
Gas6	0.717	0.405	1.65855e-48	1.00984
Galnt18	0.337	0.067	1.66977e-48	0.851036
Ptprc	0.032	0.346	1.75607e-48	-1.22743
Lilrb4a	0.017	0.305	3.75409e-48	-1.52865
Spi1	0.052	0.351	4.4099e-48	-1.44351
Pltp	0.52	0.276	4.4146e-48	1.07646
Gata2	0.313	0.059	8.84453e-48	0.768383
Axl	0.052	0.371	1.01078e-47	-1.23672
Wfdc17	0.086	0.391	1.86536e-47	-2.50708
Nfib	0.746	0.41	2.75229e-47	0.837022
Ehd2	0.599	0.29	4.0143e-47	0.937722
Wwtr1	0.498	0.222	4.40218e-47	0.890165
Ankrd33b	0.256	0.04	5.25855e-47	0.785403
Lrg1	0.3	0.072	5.63702e-47	1.78533
Prkcdbp	0.773	0.444	1.74534e-46	0.955347
Vamp5	0.512	0.246	2.1475e-46	0.90891
Rnase4	0.177	0.493	2.20475e-46	-1.32946
Ifitm3	1	0.915	2.82651e-46	0.507836
Lcp1	0.103	0.4	3.30669e-46	-1.39183
Dpt	0.079	0.363	3.84896e-46	-1.76443
Cyb5r3	0.65	0.415	3.92467e-46	0.885512
Mob2	0.392	0.199	7.23636e-46	0.803708
Id1	0.638	0.295	7.54948e-46	1.08027
Pdzd2	0.517	0.202	1.11059e-45	0.99889
S1pr1	0.522	0.194	1.82757e-45	0.750303
Ccl6	0.084	0.356	2.53163e-45	-2.8203
Serping1	0.155	0.392	2.70992e-45	-2.00712
Fli1	0.586	0.291	2.91108e-45	0.898857
Itgb2	0.02	0.299	3.68711e-45	-1.12767
Gnas	0.98	0.911	4.15683e-45	0.56168
Cd68	0.044	0.334	6.02395e-45	-1.61718
Fyb	0.037	0.332	6.25461e-45	-1.25217
Serpinf1	0.059	0.349	7.22888e-45	-1.63791
Cygb	0.074	0.355	8.57706e-45	-1.72637
Cdk2ap2	0.207	0.558	1.2709e-44	-1.00225
Lst1	0.059	0.351	1.33591e-44	-1.64847
Gm42418	0.8	0.599	1.40003e-44	0.946464
Plcb4	0.409	0.129	4.13489e-44	0.939688
Cd63	0.342	0.564	4.43221e-44	-1.42901
S100a6	0.781	0.845	6.64471e-44	-1.16019
Selplg	0.012	0.28	7.01659e-44	-1.04442
Lmcd1	0.35	0.086	6.27012e-43	0.884119
Adgrl2	0.328	0.079	1.13218e-42	0.826445
Fcgr2b	0.022	0.287	1.20583e-42	-1.2093
Gimap1	0.502	0.194	4.03139e-42	0.618494
Tsc22d1	0.635	0.333	6.59709e-42	0.961149
Htra3	0.155	0.392	9.7522e-42	-1.90469
Ccl9	0.057	0.33	1.14822e-41	-2.33465
Laptm4a	0.943	0.799	1.19089e-41	0.694924
Gpm6b	0.027	0.299	2.46645e-41	-1.21909
Tubb4b	0.722	0.494	2.97185e-41	0.899736
Iigp1	0.337	0.088	3.0798e-41	1.30415
C5ar1	0.022	0.284	3.16407e-41	-1.66352
Ctsz	0.475	0.733	3.39522e-41	-0.983987
Lgmn	0.288	0.463	5.4009e-41	-1.75961
Ptprg	0.323	0.093	7.88434e-41	0.86273
Abcb1a	0.271	0.049	8.58536e-41	0.701526
Gmfg	0.049	0.336	9.42294e-41	-1.12853
4931406P16Rik	0.466	0.187	1.37279e-40	0.812233
Pla2g16	0.453	0.236	1.47077e-40	0.808066
Sema6a	0.323	0.078	2.01713e-40	0.786618
Fam49b	0.131	0.424	2.1985e-40	-1.22245
Fxyd1	0.044	0.329	2.36352e-40	-1.23264
Fgd5	0.266	0.049	2.67212e-40	0.670906
Mesdc1	0.436	0.198	5.92049e-40	0.817736
Clic4	0.618	0.411	6.4385e-40	0.792936
Bgn	0.466	0.462	8.26605e-40	-1.50273
Ccr2	0.027	0.29	1.10388e-39	-1.67631
Pld4	0.022	0.281	1.19789e-39	-1.11503
Luzp1	0.502	0.286	1.26797e-39	0.818866
Ly86	0.027	0.284	2.19589e-39	-1.22722
Mafb	0.113	0.401	3.4501e-39	-1.49182
Prdx5	0.411	0.663	4.1127e-39	-1.00064
Ankrd37	0.357	0.126	4.42548e-39	0.943126
Ctnna1	0.591	0.374	5.83747e-39	0.787137
Tagln2	0.931	0.819	7.05529e-39	0.699302
Mfap5	0.195	0.386	7.52941e-39	-1.86842
H2-Ab1	0.325	0.428	8.15651e-39	-2.51941
Hsp90ab1	0.99	0.966	1.03667e-38	0.553708
AI607873	0.015	0.259	1.30715e-38	-0.824626
She	0.251	0.045	1.42853e-38	0.565036
Meg3	0.037	0.296	1.69438e-38	-1.7746
Ctnnbip1	0.564	0.293	1.98337e-38	0.828861
Ms4a6b	0.039	0.308	2.41495e-38	-1.25741
Cxx1a	0.532	0.287	3.17617e-38	0.828513
AF251705	0.025	0.278	3.62429e-38	-1.16782
Npc2	0.653	0.811	4.46461e-38	-0.85502
Fam46a	0.017	0.271	4.92587e-38	-0.752655
Pim1	0.101	0.398	6.37363e-38	-1.18362
Ogn	0.071	0.325	7.15775e-38	-1.61779
Gas1	0.064	0.317	8.88694e-38	-1.59079
Cd74	0.222	0.46	1.04705e-37	-3.59457
Sdc2	0.052	0.322	1.47959e-37	-1.20919
Stk17b	0.054	0.333	1.48567e-37	-1.04637
S100a1	0.537	0.293	3.30568e-37	0.794344
Ms4a6d	0.047	0.293	3.61378e-37	-1.49338
Tcf4	0.865	0.646	3.72457e-37	0.649677
Csf1r	0.03	0.29	4.51206e-37	-1.16293
Fbln1	0.076	0.318	4.80637e-37	-1.59062
Gpsm3	0.108	0.419	5.06256e-37	-0.827033
Clec3b	0.096	0.32	5.14286e-37	-2.12279
Lhfp	0.121	0.367	5.80771e-37	-1.40903
Ushbp1	0.397	0.125	6.39756e-37	0.688058
Gm10116	0.197	0.496	6.76943e-37	-1.05606
Loxl1	0.091	0.348	7.43927e-37	-1.42518
Col6a1	0.081	0.339	7.54721e-37	-1.35672
Bvht	0.333	0.105	8.44605e-37	0.765763
Klf7	0.628	0.385	1.03148e-36	0.825212
Metrnl	0.091	0.377	1.09372e-36	-1.0568
Nupr1	0.121	0.428	3.86242e-36	-1.06278
Col6a2	0.049	0.321	5.28849e-36	-1.1813
Serp1	0.3	0.611	7.64161e-36	-0.858018
Plec	0.441	0.236	8.19915e-36	0.753249
Foxp1	0.599	0.407	8.22996e-36	0.835157
Ptpn6	0.032	0.292	1.18347e-35	-0.932586
Rarres2	0.113	0.368	1.39195e-35	-1.48981
Apbb2	0.451	0.172	2.10496e-35	0.761661
Clic5	0.325	0.09	2.32166e-35	0.646297
Adgrg1	0.318	0.08	2.57134e-35	0.735191
Cd48	0.034	0.29	3.97354e-35	-0.962336
Efhd2	0.155	0.433	5.70397e-35	-1.08283
Ddit4	0.337	0.16	5.7987e-35	0.873936
Pycard	0.106	0.382	7.33447e-35	-0.967525
Robo4	0.31	0.077	7.886e-35	0.709237
Mfge8	0.65	0.384	9.67564e-35	0.641983
Plxnd1	0.387	0.137	1.25318e-34	0.791291
Medag	0.022	0.26	1.40988e-34	-0.8817
Mpeg1	0.037	0.286	1.61228e-34	-1.13412
Slfn5	0.517	0.259	1.7115e-34	0.873756
Bicc1	0.025	0.266	2.00095e-34	-0.870888
Smoc2	0.113	0.337	2.21125e-34	-1.83135
Tmod3	0.596	0.391	2.52428e-34	0.769837
Il1b	0.069	0.292	2.58682e-34	-2.32632
Itga6	0.49	0.203	2.64133e-34	0.721795
Plxdc2	0.022	0.262	2.81612e-34	-0.816773
Islr	0.03	0.269	3.18155e-34	-1.06009
Pim3	0.463	0.209	3.19939e-34	0.829147
Fam105a	0.025	0.268	3.23066e-34	-0.886005
Lum	0.204	0.421	3.87129e-34	-1.88427
Cd14	0.047	0.297	4.913e-34	-1.66435
Pcolce	0.264	0.41	5.52628e-34	-1.39604
AI662270	0.02	0.252	6.90662e-34	-0.826961
Entpd2	0.054	0.303	8.89112e-34	-1.15569
Sox4	0.431	0.208	1.02432e-33	0.932233
Rab7b	0.022	0.26	1.33771e-33	-0.646726
Rasal2	0.276	0.068	1.3614e-33	0.604068
Pcolce2	0.034	0.277	2.35172e-33	-1.18469
Arpc1b	0.83	0.93	2.54921e-33	-0.737208
Irf5	0.022	0.259	2.78863e-33	-0.751487
Plek	0.03	0.274	2.96589e-33	-0.996256
Cmtm7	0.175	0.479	3.19368e-33	-0.817765
Aspn	0.044	0.276	3.46192e-33	-1.53468
Fry	0.305	0.089	3.90839e-33	0.740592
Plac8	0.054	0.279	4.04093e-33	-2.19842
Dock9	0.278	0.064	4.18183e-33	0.67345
Cybb	0.032	0.272	4.35595e-33	-1.1026
App	0.833	0.702	4.57012e-33	0.631205
Ctsd	0.744	0.742	7.66797e-33	-0.919151
Dennd5b	0.347	0.11	8.13537e-33	0.756784
Timp4	0.308	0.091	9.32065e-33	1.20269
Cltb	0.596	0.437	9.66625e-33	0.710779
Entpd1	0.286	0.102	1.16281e-32	0.700968
Smco4	0.532	0.266	1.41431e-32	0.724438
Etl4	0.293	0.074	1.49651e-32	0.678817
Rnf149	0.057	0.315	1.83734e-32	-0.819603
Akap2	0.35	0.124	6.43918e-32	0.736597
Cd44	0.047	0.296	6.47512e-32	-0.933027
Txnip	0.714	0.547	1.09355e-31	0.762029
Crispld2	0.076	0.312	1.37806e-31	-1.43031
S100a13	0.813	0.694	3.78512e-31	0.60665
Crim1	0.286	0.088	5.19762e-31	0.711888
Hmox1	0.091	0.318	5.28817e-31	-2.04401
Acvrl1	0.498	0.339	9.22564e-31	0.756637
Msrb1	0.197	0.449	9.34213e-31	-1.09553
H2B-EGFP	0.03	0.263	1.25576e-30	-0.94535
H2-Aa	0.195	0.377	1.86148e-30	-2.78515
Rgcc	0.559	0.287	1.91999e-30	0.532821
Cebpb	0.037	0.268	2.3143e-30	-0.815436
Ccl2	0.089	0.284	2.54575e-30	-2.36517
Gna11	0.527	0.304	2.68993e-30	0.735629
C1qb	0.128	0.312	4.00782e-30	-2.65575
Sigirr	0.261	0.064	5.05568e-30	0.617744
Prex2	0.446	0.191	5.1612e-30	0.846067
Emp3	0.505	0.73	5.38253e-30	-0.865027
Pcdh17	0.271	0.07	7.70248e-30	0.625897
Ccdc80	0.303	0.399	9.73098e-30	-1.31792
S100a8	0.241	0.35	1.24882e-29	-2.58175
Tpd52	0.131	0.365	1.46449e-29	-1.06383
Anp32a	0.717	0.61	1.47598e-29	0.592501
Tspan6	0.377	0.149	2.17222e-29	0.704188
Thbs1	0.057	0.29	2.40751e-29	-1.49883
Spp1	0.123	0.312	2.7924e-29	-3.1406
Olfml3	0.084	0.339	3.41572e-29	-0.951577
Plscr2	0.318	0.1	3.61823e-29	0.735678
Efna1	0.315	0.101	4.87306e-29	0.619176
Syne2	0.347	0.137	4.91292e-29	0.701744
Arap3	0.266	0.067	5.80954e-29	0.59065
Plin2	0.241	0.449	6.57487e-29	-1.00606
Sgk1	0.608	0.342	7.13675e-29	0.742717
Ppp1r2	0.69	0.54	7.73166e-29	0.690046
Trim47	0.507	0.334	8.51103e-29	0.712412
Ncf2	0.039	0.268	1.08506e-28	-0.840656
Lima1	0.406	0.234	2.35937e-28	0.692657
Pmp22	0.227	0.416	2.47094e-28	-1.12727
Fam101b	0.473	0.221	2.52275e-28	0.918948
Vcan	0.039	0.267	2.76654e-28	-0.76811
Pnkd	0.488	0.341	3.73921e-28	0.656239
H2-DMa	0.059	0.291	4.18286e-28	-1.17854
Glipr2	0.037	0.265	4.73895e-28	-0.632225
Ktn1	0.485	0.265	5.44215e-28	0.776306
Fscn1	0.458	0.216	7.50505e-28	0.616313
H2-K1	0.909	0.868	7.6513e-28	0.603679
Snx18	0.081	0.336	7.7734e-28	-0.594871
C1qa	0.111	0.275	8.35906e-28	-2.58975
Dpep1	0.074	0.29	8.54105e-28	-1.55178
Igfbp4	0.241	0.458	8.84631e-28	-1.43457
Actb	0.995	0.998	1.3753e-27	-1.08599
Gimap5	0.313	0.1	1.92011e-27	0.511889
Flnb	0.264	0.081	2.46688e-27	0.635958
Sod3	0.057	0.279	2.56962e-27	-0.895225
Arhgdib	0.394	0.602	2.73224e-27	-0.980956
Gnai2	0.901	0.874	4.05181e-27	0.500323
Limch1	0.325	0.113	4.56906e-27	0.634394
Irf8	0.081	0.325	4.69678e-27	-0.895498
Aif1	0.062	0.274	5.26554e-27	-1.24009
Klf4	0.756	0.59	6.07056e-27	0.894843
Cxx1b	0.404	0.213	9.24e-27	0.740794
Adamts5	0.074	0.286	1.63949e-26	-1.17606
Arhgap29	0.372	0.148	1.85132e-26	0.624317
Abca8a	0.059	0.282	1.89589e-26	-0.966939
Actr3	0.502	0.713	2.06846e-26	-0.73542
Sdc4	0.069	0.31	2.36755e-26	-0.779748
Tmem59	0.852	0.745	2.48018e-26	0.547531
Anxa3	0.729	0.52	2.48759e-26	0.673519
Rras	0.502	0.323	2.77588e-26	0.672729
Unc93b1	0.163	0.419	3.10188e-26	-0.94261
Rpsa	0.933	0.964	3.23966e-26	-0.597001
Fstl1	0.35	0.374	3.30572e-26	-0.946389
Triobp	0.453	0.263	5.71231e-26	0.653227
Tspan9	0.308	0.125	5.91515e-26	0.640126
Fnbp1l	0.296	0.097	6.31726e-26	0.573876
Cmtm8	0.298	0.092	6.93761e-26	0.599335
Parvb	0.315	0.111	8.04855e-26	0.656515
Bmpr2	0.345	0.175	8.96984e-26	0.635804
Mmp2	0.118	0.331	9.7511e-26	-1.15616
Cxcl2	0.094	0.277	1.07256e-25	-2.40718
G0s2	0.111	0.313	1.09145e-25	-1.25239
Fn1	0.187	0.421	1.35396e-25	-1.50269
Cd302	0.217	0.473	1.50801e-25	-0.805404
Ctsl	0.601	0.751	2.53876e-25	-0.850975
Ppic	0.599	0.344	2.93506e-25	0.712757
Rab3il1	0.047	0.268	4.206e-25	-0.603112
Pf4	0.116	0.289	4.93629e-25	-2.32991
Anxa1	0.303	0.549	5.66905e-25	-0.863533
Msn	0.776	0.709	6.96832e-25	0.548524
Vimp	0.209	0.49	7.68815e-25	-0.618994
Plcb1	0.286	0.09	8.11675e-25	0.714611
Gpx8	0.054	0.266	8.23125e-25	-0.708711
Anxa2	0.904	0.789	8.79004e-25	0.540412
C1qc	0.076	0.264	1.03784e-24	-2.27543
F11r	0.31	0.102	1.11861e-24	0.613351
Ets1	0.539	0.299	1.16593e-24	0.670946
Nr4a1	0.123	0.353	1.16887e-24	-0.948333
Dst	0.399	0.224	1.29945e-24	0.644609
Sdf2l1	0.131	0.375	1.48294e-24	-0.829143
Gbp7	0.347	0.172	1.72497e-24	0.764085
H2-Eb1	0.143	0.325	1.7719e-24	-2.55448
Oaf	0.091	0.311	2.16384e-24	-0.962691
Rapgef3	0.251	0.067	2.39522e-24	0.625054
Sec61g	0.724	0.869	2.78525e-24	-0.599981
Prkcd	0.067	0.291	4.91777e-24	-0.570562
Icam1	0.288	0.184	5.93685e-24	0.678391
Sat1	0.5	0.729	6.42062e-24	-0.759657
Gbp2	0.357	0.156	1.1073e-23	0.681019
Ceacam1	0.296	0.1	1.62193e-23	0.732729
Psap	0.887	0.889	1.84084e-23	-0.722795
Rplp0	0.983	0.991	1.84437e-23	-0.505303
Fermt2	0.618	0.364	2.07834e-23	0.655771
Fam65a	0.266	0.1	2.67315e-23	0.633707
Fam43a	0.443	0.206	3.33179e-23	0.662206
Higd2a	0.549	0.472	3.82054e-23	0.512185
Cnn3	0.596	0.371	4.04264e-23	0.647548
Sh3bgrl3	0.84	0.874	4.19295e-23	-0.591354
Prss23	0.389	0.224	5.08151e-23	0.913137
Wasf2	0.655	0.541	5.27317e-23	0.579091
Cers4	0.298	0.123	5.70713e-23	0.691268
Snx5	0.207	0.449	5.73762e-23	-0.76508
Csrp1	0.562	0.381	5.82209e-23	0.64139
Tnfrsf1a	0.618	0.515	6.28329e-23	0.554443
Snhg18	0.057	0.272	7.20767e-23	-0.757079
Atp2b4	0.271	0.122	7.5893e-23	0.595511
Pdlim2	0.131	0.365	7.65857e-23	-0.836604
Limd2	0.108	0.317	8.99894e-23	-0.917147
Syne1	0.288	0.141	9.20347e-23	0.619954
Pi16	0.448	0.393	1.00502e-22	-0.766452
Trp53i11	0.33	0.118	1.51848e-22	0.712032
Sypl	0.599	0.446	1.99376e-22	0.573549
Ptpn18	0.251	0.443	2.58272e-22	-0.897558
Tjp1	0.286	0.114	2.68498e-22	0.591819
Actn4	0.534	0.395	2.75383e-22	0.623066
Timp3	0.675	0.407	2.96382e-22	0.648031
Phlda1	0.131	0.378	3.19593e-22	-0.758356
Ctsa	0.234	0.479	3.46591e-22	-0.77353
Kctd10	0.411	0.243	3.54385e-22	0.594465
Hexa	0.337	0.571	7.38139e-22	-0.706604
St3gal6	0.342	0.154	9.41626e-22	0.664439
Rhoc	0.719	0.51	1.24418e-21	0.615025
Cbfa2t3	0.355	0.156	1.26881e-21	0.616156
Serpine2	0.094	0.309	1.50499e-21	-1.03573
Plk2	0.389	0.175	1.85044e-21	0.661791
Lrrc8c	0.377	0.169	1.92671e-21	0.597149
P2rx4	0.089	0.305	2.44143e-21	-0.546755
Timp2	0.369	0.521	3.40108e-21	-0.890125
Plpp3	0.67	0.428	4.03458e-21	0.558947
Tpst2	0.517	0.35	4.17952e-21	0.616875
Ugp2	0.182	0.424	4.22717e-21	-0.674243
Tpst1	0.094	0.321	4.42861e-21	-0.62494
Fos	0.687	0.841	8.35527e-21	-0.632369
Tspan4	0.384	0.258	9.01675e-21	0.590071
Grn	0.562	0.627	1.20371e-20	-0.554844
Tmem140	0.421	0.244	1.20979e-20	0.640043
Rasgrp3	0.3	0.108	1.68685e-20	0.564363
Pfkl	0.35	0.179	1.76629e-20	0.620775
Sirpa	0.081	0.297	1.80345e-20	-0.621482
Creg1	0.204	0.453	1.86157e-20	-0.634054
Dap	0.232	0.465	2.25189e-20	-0.678953
Nxn	0.254	0.101	2.36325e-20	0.537108
Hs3st1	0.254	0.119	2.40924e-20	0.639546
Nrros	0.057	0.257	3.08547e-20	-0.680907
Sh2d3c	0.251	0.079	3.198e-20	0.519777
Ipo11	0.256	0.089	3.50769e-20	0.54484
Sptan1	0.47	0.33	3.5367e-20	0.562249
Mllt4	0.377	0.172	3.84806e-20	0.61404
Vgll4	0.451	0.305	4.2615e-20	0.545124
Ehd1	0.567	0.421	4.65131e-20	0.611477
Ptgis	0.081	0.292	6.59637e-20	-0.824772
Ezr	0.062	0.264	7.0057e-20	-0.590569
Col4a1	0.658	0.436	8.18044e-20	0.744357
Ckb	0.288	0.509	8.67342e-20	-0.784718
Arid5b	0.433	0.246	1.03582e-19	0.67972
Arl4c	0.064	0.268	1.31001e-19	-0.638253
B230219D22Rik	0.52	0.387	1.7106e-19	0.549093
Hcls1	0.101	0.313	1.91143e-19	-0.717262
9430020K01Rik	0.273	0.118	2.09981e-19	0.61495
2900026A02Rik	0.251	0.085	3.31219e-19	0.506761
1700025G04Rik	0.379	0.261	5.02321e-19	0.54931
Hspa5	0.685	0.794	5.42858e-19	-0.671815
Kcna5	0.271	0.093	5.4754e-19	0.665178
Snrk	0.49	0.311	7.33028e-19	0.593243
Sec61b	0.608	0.783	1.3251e-18	-0.519709
Txndc5	0.17	0.405	1.42886e-18	-0.630105
Tcn2	0.409	0.296	1.78229e-18	0.555883
Ccnd2	0.507	0.329	2.07543e-18	0.728613
Ablim1	0.458	0.263	3.06822e-18	0.664589
Mgp	0.655	0.634	3.68767e-18	-1.33489
Tnfaip1	0.458	0.284	3.75542e-18	0.565835
Rbpms	0.355	0.191	4.83051e-18	0.524931
Mif	0.478	0.641	5.07714e-18	-0.520592
Hexb	0.256	0.489	6.42008e-18	-0.735321
Fgfr1	0.064	0.257	6.57426e-18	-0.532516
Fzd4	0.303	0.127	1.09485e-17	0.575903
Abi3	0.397	0.21	1.75486e-17	0.557414
Nostrin	0.281	0.107	1.8453e-17	0.592151
Pkm	0.707	0.784	2.32643e-17	-0.533584
Cald1	0.682	0.441	2.56952e-17	0.500754
Ccdc85b	0.392	0.204	3.39326e-17	0.573122
Sbds	0.47	0.363	3.88317e-17	0.513541
Rcn3	0.202	0.346	4.94954e-17	-0.835885
Dab2ip	0.298	0.128	5.16829e-17	0.540321
Ccnd1	0.49	0.322	7.76867e-17	0.650998
Tns1	0.377	0.225	8.2412e-17	0.572686
Pcsk6	0.079	0.256	8.28014e-17	-0.758361
Ppp2r5a	0.323	0.18	8.73889e-17	0.53758
Btg1	0.729	0.797	8.91546e-17	-0.633579
H2-Q4	0.379	0.205	1.03096e-16	0.590085
Col8a1	0.138	0.276	1.23764e-16	-1.08229
Uaca	0.288	0.113	1.54976e-16	0.511513
Lgals9	0.488	0.365	1.66395e-16	0.533353
Utrn	0.32	0.154	1.71466e-16	0.566951
Hspa1a	0.463	0.373	1.75613e-16	1.01456
Ifngr2	0.172	0.399	1.88949e-16	-0.543648
Cndp2	0.163	0.36	2.32642e-16	-0.591162
Arpc5	0.576	0.741	2.47489e-16	-0.502497
Tns2	0.281	0.151	2.63721e-16	0.522732
Trf	0.091	0.29	3.29094e-16	-0.748558
Mecom	0.372	0.197	5.29256e-16	0.525432
Tuba1c	0.076	0.261	5.81098e-16	-0.574279
Pgd	0.101	0.295	6.5327e-16	-0.513671
H2-Q6	0.251	0.086	6.62158e-16	0.543665
S100a9	0.185	0.26	6.75749e-16	-2.17624
Rgs2	0.16	0.353	8.65338e-16	-0.935584
Fez2	0.394	0.257	8.70961e-16	0.528799
H2afj	0.318	0.553	1.07595e-15	-0.516705
Gusb	0.175	0.395	1.16698e-15	-0.540882
Cpne8	0.251	0.118	3.39088e-15	0.523096
Ets2	0.426	0.229	4.47158e-15	0.591354
Junb	0.714	0.863	6.10584e-15	-0.523095
Adamts1	0.293	0.158	6.26831e-15	0.745849
Gstm1	0.495	0.528	8.29358e-15	-0.68643
Fbln5	0.094	0.272	9.4388e-15	-0.775226
Mum1	0.273	0.162	2.06853e-14	0.509833
Mcl1	0.355	0.555	2.79484e-14	-0.535916
Dab2	0.313	0.356	2.86793e-14	-0.532624
Atf5	0.108	0.273	2.89791e-14	-0.717656
Prkch	0.286	0.122	3.38139e-14	0.54931
Gda	0.113	0.302	4.52659e-14	-0.675573
Gm8730	0.623	0.785	4.7426e-14	-0.52677
Pls3	0.488	0.308	6.03397e-14	0.503967
Camk2n1	0.128	0.28	9.39416e-14	-0.686647
Slc28a2	0.281	0.117	1.72445e-13	0.605782
Grasp	0.298	0.161	1.88272e-13	0.501463
Fam96a	0.222	0.426	2.25657e-13	-0.555
Ackr3	0.271	0.139	3.59629e-13	0.588441
Ucp2	0.281	0.426	5.28737e-13	-0.685684
Col4a2	0.517	0.374	1.15243e-12	0.66875
Pitpna	0.355	0.516	1.19933e-12	-0.529007
Ehd4	0.406	0.304	3.78461e-12	0.573219
Ecm1	0.276	0.47	5.35378e-12	-0.547489
Igfbp6	0.165	0.356	9.23039e-12	-0.760205
Asap2	0.266	0.126	1.18542e-11	0.518101
Scarb1	0.261	0.155	1.91274e-11	0.570102
Cdc42ep3	0.352	0.218	2.63485e-11	0.519221
Mgst1	0.197	0.379	5.55357e-11	-0.55468
Ptpn1	0.256	0.424	5.93209e-11	-0.516429
H2afz	0.675	0.781	6.11587e-11	-0.512776
Lrrc8a	0.384	0.244	8.78226e-11	0.532276
Socs2	0.473	0.331	9.09539e-11	0.545008
Ctsh	0.249	0.45	1.01911e-10	-0.59659
Fbn1	0.182	0.3	1.78424e-10	-0.709
Ifi204	0.106	0.262	1.32551e-09	-0.561687
Fxyd6	0.495	0.331	6.21431e-09	0.563447
Prelp	0.155	0.31	1.60213e-08	-0.695003
Mxra8	0.209	0.313	2.00656e-08	-0.54546
Lamc1	0.273	0.361	2.52463e-07	-0.518167
Gadd45g	0.31	0.248	5.51847e-07	0.513057
Dusp1	0.621	0.758	6.18664e-07	-0.553557
Atf3	0.182	0.342	1.00983e-06	-0.549958

[truncated: 14 more sheets: DC vs rest, EC2 vs rest, TC1-Cd8 vs rest, TC2-Cd4 vs rest, MAC-TR vs rest, Mural vs rest, Cyc vs rest, MAC6 vs rest, MAC-IFNIC vs rest, MAC7 vs rest, MAC8 vs rest, F-WntX vs rest, NKC vs rest, Glial vs rest]
