# Supplementary material for: Single-cell expression profiling reveals dynamic flux of cardiac stromal, vascular and immune cells in health and injury
Source: eLife journal article supplement (doi:10.7554/elife.43882), 2019-03-26
Supplement: supp [file elife-43882-supp-v1.zip › elife_poa_e43882_Supplementary_File_2.xlsx]

## Sheet: TIP
	M1MΦ	EC1	F-SL	F-Act	F-SH	BC	M2MΦ	M1Mo	MYO	EC3	DC	EC2	TC1-Cd8	TC2-Cd4	MAC-TR	Mural	Cyc	MAC6	MAC-IFNIC	MAC7	MAC8	F-WntX	NKC	Glial
Sham vs MI-day 3	0	0	0	0.01989	0	9e-05	0.30554	0	0.41473	0.08584	3e-05	0.01064	0.06276	0.04331	0.02671	0.00407	0.13332	0.02044	0.00159	0.33979	0.00673	0.03409	0.09409	0.16007
Sham vs MI-day 7	0.09955	0.00923	0	0.46875	0.00135	0.43911	0	0.18627	0	0.21586	0.0607	0.14251	0.21397	0.42103	0.1456	0.03717	0.03157	0.44954	0.21764	0.23398	0.38029	0.06552	0.41719	0.2813
MI-day 3 vs MI-day 7	0	0.00178	0.01592	0.02962	0.02851	0.00077	0	0	0	0.32122	0.00989	0.15481	0.02063	0.05065	0.24964	0.26218	0.20815	0.03677	0.02067	0.35746	0.02091	0.44256	0.19486	0.32611

## Sheet: GFP
	F-SL	MYO	F-Act	F-SH	F-Trans	F-WntX	F-Cyc	F-IFNS	MAC	EPI	EC
Sham vs MI-day 3	0	0.39102	0	0	0.46063	0.03214	0	0.43511	6e-05	0.46162	0.27723
Sham vs MI-day 7	0	0	0.03225	0	0.00065	0.00206	0.02367	0.18214	0.47881	0.00892	0.26392
MI-day 3 vs MI-day 7	0.01532	0	0	0.06083	0.00725	6e-05	0	0.26993	8e-05	0.01633	0.33097
