# Supplementary material for: Single-cell expression profiling reveals dynamic flux of cardiac stromal, vascular and immune cells in health and injury
Source: eLife journal article supplement (doi:10.7554/elife.43882), 2019-03-26
Supplement: supp [file elife-43882-supp-v1.zip › elife_poa_e43882_Supplementary_File_3.xlsx]

## Sheet: M1MФ vs MACs
Gene	pct.1	pct.2	p_val_adj	Log2FoldChange
Cstb	0.973	0.825	1.12064e-305	1.33472
S100a8	0.55	0.473	2.903e-256	-3.65987
Ctsd	0.981	0.842	1.45919e-250	1.07054
S100a9	0.396	0.333	1.22007e-247	-3.79556
Spp1	0.889	0.564	2.93373e-246	2.27078
Lgals1	0.976	0.854	5.41171e-232	1.05926
Cst3	0.987	0.995	3.79533e-221	-0.980951
Lgmn	0.974	0.807	1.82622e-213	0.977512
Ftl1	1	1	4.50221e-208	0.802549
Pkm	0.959	0.888	3.08229e-195	0.950648
Mif	0.849	0.607	7.56816e-188	1.15731
Ctsl	0.871	0.686	9.59511e-176	1.25517
Cybb	0.493	0.837	2.68237e-172	-1.03024
Aldoa	0.941	0.854	5.34247e-164	0.926218
Mgp	0.155	0.484	3.22316e-163	-1.36177
Ccl7	0.653	0.295	2.39593e-162	2.20856
Arg1	0.562	0.169	2.56142e-162	2.02853
Ifitm6	0.148	0.435	1.50726e-152	-1.61936
Ccl2	0.798	0.477	6.47772e-151	1.68819
Gapdh	0.979	0.952	4.37415e-144	0.718749
Dab2	0.799	0.498	1.07387e-140	1.01246
Fn1	0.851	0.559	7.29788e-139	1.01556
Fau	0.998	1	6.77138e-138	-0.51937
Ctsb	0.994	0.966	4.45009e-135	0.854361
Cotl1	0.978	0.938	2.86386e-132	0.63055
Hpgd	0.033	0.296	4.26767e-128	-1.04295
Tmem176b	0.287	0.605	4.5195e-128	-1.31767
Msr1	0.715	0.413	5.77332e-127	0.937015
Capg	0.864	0.676	8.26882e-124	0.806811
Ldha	0.908	0.832	2.10798e-123	0.824531
Cfp	0.764	0.49	3.05185e-120	0.911746
Fth1	1	1	2.04801e-119	0.734268
Tpi1	0.803	0.642	6.04697e-119	0.901256
Eno1	0.895	0.805	1.29581e-118	0.80233
C5ar1	0.891	0.713	2.71154e-118	0.785231
Hp	0.31	0.455	2.07883e-117	-1.39517
Cox7a2l	0.636	0.815	2.77935e-114	-0.77799
Ms4a6d	0.884	0.721	6.22127e-112	0.716747
Dcn	0.165	0.41	9.02136e-111	-1.3333
Gm9843	0.905	0.946	1.04807e-108	-0.656133
Ccl9	0.927	0.76	1.53933e-107	0.945443
Sdcbp	0.958	0.885	4.68508e-107	0.628312
Tgfbi	0.953	0.85	7.38352e-106	0.840529
Ecm1	0.652	0.398	1.07825e-104	0.960907
Actb	1	1	1.18203e-104	0.814163
Plin2	0.836	0.704	2.27375e-103	0.858503
Msrb1	0.723	0.791	2.36173e-103	-0.9056
Ybx1	0.98	0.938	1.56188e-102	0.544331
Nme1	0.813	0.654	3.6879e-101	0.689756
Gm10073	0.652	0.773	7.92255e-101	-0.706623
Prr13	0.547	0.767	8.03874e-101	-0.776742
Rpl10-ps3	0.813	0.842	4.48755e-99	-0.6768
Ctsc	0.971	0.887	7.32269e-98	0.688511
Rps12	0.965	0.975	2.05814e-97	-0.535561
Aprt	0.854	0.71	3.51888e-97	0.677745
Mgst1	0.187	0.427	6.71414e-97	-1.047
Tmem176a	0.218	0.499	2.12997e-96	-1.09148
Gmfg	0.55	0.797	6.55692e-95	-0.727824
Pgam1	0.802	0.665	9.45519e-94	0.740733
Thbs1	0.706	0.396	8.20482e-93	0.953898
Slamf9	0.137	0.365	1.47546e-89	-0.911186
Eif4a1	0.943	0.9	3.08739e-89	0.563487
Prdx1	0.966	0.917	5.38672e-88	0.710619
Pdia6	0.806	0.68	6.69784e-86	0.686307
Hmox1	0.77	0.558	9.18952e-85	1.32432
Mt1	0.868	0.712	7.60301e-84	0.862955
Gsn	0.726	0.738	1.33068e-82	-0.730272
Samhd1	0.517	0.698	4.0503e-80	-0.708388
Hsp90b1	0.865	0.776	7.63343e-80	0.609897
Ranbp1	0.71	0.548	7.8832e-80	0.633773
Ccl6	0.936	0.84	9.53793e-80	0.785829
St13	0.721	0.565	2.91579e-79	0.615088
Smpdl3a	0.492	0.685	6.00819e-79	-0.788619
Ptprc	0.586	0.798	1.13117e-75	-0.653517
Ramp1	0.11	0.354	1.38805e-75	-0.537421
Pou2f2	0.27	0.522	3.4913e-75	-0.814445
Sdc4	0.539	0.3	6.21042e-75	0.877506
Maf	0.723	0.495	1.76775e-73	0.74577
Emp1	0.523	0.301	2.29522e-73	0.854106
Cd81	0.302	0.511	4.31058e-73	-1.06106
Tuba1b	0.822	0.702	1.11582e-71	0.567818
Pdia3	0.822	0.757	1.74369e-71	0.553536
H2-Eb1	0.323	0.479	9.56284e-71	-2.07248
Hspa5	0.896	0.823	1.08504e-70	0.644259
Pf4	0.709	0.517	1.5576e-70	1.28637
Cd72	0.162	0.356	1.85526e-70	-1.08542
Cd93	0.549	0.338	2.1647e-69	0.681076
Plac8	0.55	0.543	1.43489e-68	-1.0624
H2-K1	0.824	0.914	2.67038e-68	-0.5944
Ran	0.784	0.69	5.24474e-68	0.531479
Cxcl2	0.782	0.538	4.05107e-67	0.580947
Bax	0.791	0.671	2.87295e-66	0.565992
Selplg	0.471	0.697	1.43976e-65	-0.612236
Rps12-ps3	0.749	0.835	1.5742e-65	-0.514822
Lilrb4a	0.877	0.777	3.28439e-65	0.52958
Adam8	0.506	0.26	3.83142e-65	0.669365
Dok2	0.53	0.272	4.08542e-65	0.651115
Col3a1	0.076	0.269	1.07912e-64	-0.560318
Pdia4	0.518	0.324	2.16227e-64	0.658813
Klf2	0.611	0.725	6.65282e-64	-0.958317
Lsp1	0.727	0.87	8.21716e-64	-0.632972
Igfbp7	0.236	0.473	3.30654e-63	-0.759966
Hmgb2	0.39	0.584	3.12404e-62	-0.664877
Calr	0.879	0.807	3.15086e-62	0.537794
Ypel3	0.389	0.639	4.34421e-62	-0.617438
Rab5c	0.778	0.65	4.39639e-62	0.526673
Adgre5	0.252	0.476	2.74356e-61	-0.670904
Pltp	0.231	0.444	1.45596e-60	-0.820542
Sdf2l1	0.693	0.545	2.22153e-60	0.600429
Fcgrt	0.158	0.377	3.49418e-60	-0.655338
Txnip	0.274	0.486	4.09816e-60	-0.701595
Basp1	0.548	0.354	1.4484e-59	0.680877
Napsa	0.386	0.495	1.25899e-58	-0.730472
Lgals3	0.978	0.905	2.43369e-57	0.528208
Timp2	0.329	0.527	7.19173e-57	-0.749222
Hexb	0.627	0.672	1.12053e-56	-0.627273
Igf1	0.091	0.255	5.32793e-54	-0.739023
Tgm2	0.567	0.34	1.03638e-53	0.711348
Clec4d	0.606	0.377	3.14335e-53	0.590503
Serinc3	0.506	0.679	6.94184e-53	-0.59113
Tmcc1	0.199	0.391	2.0466e-51	-0.622859
Bcl2l1	0.393	0.201	7.61266e-51	0.562294
BC028528	0.271	0.479	1.03819e-50	-0.51365
Fabp4	0.348	0.577	1.2618e-50	-0.777225
Serpinb6a	0.11	0.293	5.5101e-50	-0.613371
Nt5dc2	0.364	0.198	1.22694e-48	0.595125
Clec4n	0.569	0.426	2.66658e-48	0.813572
Mcemp1	0.16	0.323	5.80504e-48	-0.74529
C1qc	0.602	0.571	1.33117e-47	-0.763784
Rab3il1	0.548	0.404	1.65124e-47	0.522985
H2-Ab1	0.528	0.589	5.20021e-47	-1.43513
Gngt2	0.651	0.756	8.38429e-47	-0.586706
C1qa	0.583	0.567	1.43404e-46	-0.875372
H2-Aa	0.42	0.536	4.33354e-46	-1.61137
Gsr	0.445	0.521	9.72092e-46	-0.679064
Por	0.511	0.303	1.04446e-45	0.579799
Fam162a	0.412	0.252	3.68526e-45	0.555266
Snx2	0.653	0.52	6.82828e-45	0.501163
Adap2os	0.495	0.338	2.62437e-44	0.547042
AW112010	0.169	0.349	4.05496e-44	-0.616193
Isg15	0.259	0.296	9.03153e-44	-0.788473
Apoe	0.987	0.969	2.53407e-43	-0.563142
Cnn2	0.406	0.599	2.81641e-43	-0.507913
Glrx	0.545	0.394	3.39147e-43	0.552906
Igfbp4	0.113	0.27	1.53848e-42	-0.581449
Mndal	0.236	0.414	2.01889e-42	-0.571402
Hspa1a	0.344	0.376	2.40375e-42	-0.742757
Trf	0.424	0.624	3.46413e-42	-0.623552
Clec4a2	0.745	0.626	3.87745e-42	0.517285
Cfh	0.12	0.274	4.26608e-42	-0.559253
Sparc	0.163	0.357	7.85792e-42	-0.52515
Tppp3	0.173	0.322	2.78402e-38	-0.724629
Ier2	0.714	0.81	2.90848e-38	-0.551426
Nfkbiz	0.294	0.468	3.34231e-38	-0.57967
Jund	0.651	0.78	6.41928e-38	-0.51374
Rap2b	0.543	0.397	8.723e-38	0.521529
Cd74	0.636	0.652	7.97782e-37	-1.39265
Hilpda	0.274	0.148	4.48219e-36	0.733886
Cebpb	0.467	0.573	5.14122e-36	-0.547348
Tubb6	0.56	0.411	1.5418e-35	0.504147
Cdk2ap2	0.624	0.726	2.16912e-35	-0.536562
Ly6c2	0.271	0.365	2.94461e-34	-0.876387
Fabp5	0.497	0.423	8.13562e-34	1.02065
Nr4a2	0.347	0.203	1.59265e-31	0.561056
Myh9	0.635	0.5	1.83294e-31	0.508496
Cd83	0.191	0.345	2.84317e-31	-0.619165
Cx3cr1	0.307	0.479	2.85147e-30	-0.552175
Crip1	0.926	0.935	1.79417e-28	-0.56572
Rgs1	0.514	0.352	3.9666e-25	0.550095
Egr1	0.481	0.543	1.23172e-24	-0.509306
Sepp1	0.753	0.793	4.75872e-24	-0.645509
Gadd45b	0.275	0.39	6.77261e-24	-0.54273
C1qb	0.661	0.606	1.92348e-23	-0.507301
Slpi	0.224	0.311	1.47572e-21	-0.926479
Osm	0.475	0.338	6.31333e-21	0.577536

## Sheet: M2MФ vs MACs
Gene	pct.1	pct.2	p_val_adj	Log2FoldChange
Cd72	0.816	0.154	1.00714e-277	2.08934
Rplp1	0.999	0.992	3.52476e-244	0.819619
Ccl6	0.741	0.916	5.26695e-238	-2.75886
Cxcl16	0.964	0.458	1.87339e-236	1.5216
Gm10073	0.994	0.659	6.74118e-234	1.21454
Rpl10-ps3	0.984	0.798	4.31514e-218	1.18738
S100a6	0.841	0.956	2.83185e-214	-1.51306
Hexb	0.967	0.589	4.01527e-211	1.50637
Chil3	0.173	0.732	5.39713e-205	-3.63179
Ms4a7	0.938	0.533	2.57388e-191	1.80893
Eef1a1	1	0.995	1.34408e-189	0.690867
C1qb	0.945	0.574	1.45972e-188	1.5506
Rgs10	0.978	0.647	1.74787e-183	1.15103
C1qa	0.926	0.508	8.97495e-183	1.70734
Slamf9	0.729	0.161	3.29767e-181	1.30681
Pkm	0.907	0.926	6.08701e-181	-1.34306
Pltp	0.821	0.247	3.93783e-173	1.23146
Rps12	1	0.964	2.24671e-172	0.723343
Ccl9	0.716	0.867	1.01297e-169	-1.94723
Rps20	1	0.963	1.4556e-168	0.736758
C1qc	0.942	0.519	9.9076e-168	1.54481
S100a11	0.87	0.915	5.33948e-167	-1.54021
Rps4x	1	0.978	3.50985e-165	0.65706
Hpgds	0.671	0.141	3.56548e-163	0.985206
Rps24	1	0.986	4.10552e-162	0.648584
Ckb	0.879	0.337	1.03864e-161	1.19486
Rpl23	1	0.992	1.15895e-158	0.622073
Tmem176b	0.883	0.363	1.5759e-157	1.38381
Srgn	0.954	0.948	1.7932e-157	-1.54983
Bmyc	0.658	0.142	7.84092e-157	0.795726
Rpl10	1	0.991	1.82777e-154	0.587686
Cx3cr1	0.852	0.306	1.0728e-152	1.03736
Actb	1	1	2.61094e-152	-1.53096
Anxa2	0.804	0.856	1.14848e-150	-1.32772
Ifitm3	0.95	0.971	3.43315e-149	-1.28909
Tmsb10	0.92	0.929	7.00003e-149	-1.47444
Dnaja1	0.729	0.808	2.31993e-146	-1.14729
Gda	0.265	0.625	2.9247e-146	-1.54659
Tmem176a	0.801	0.275	3.63876e-145	1.27583
Rpl32	1	0.992	1.9335e-144	0.546651
Gm9843	0.999	0.912	1.10761e-143	0.797878
Apoe	0.997	0.974	8.51652e-143	1.76186
H2-Eb1	0.763	0.333	1.62183e-138	2.35205
Rpl31	0.999	0.969	1.72614e-137	0.584377
Olfml3	0.575	0.112	4.16306e-137	0.972905
Cst3	1	0.989	6.83355e-135	0.785144
Rpl11	1	0.981	3.12788e-134	0.501076
Rpl17	1	0.991	1.58851e-133	0.558366
Rpl30	0.996	0.946	1.56288e-131	0.615543
Rps15	1	0.975	1.43375e-129	0.541404
Actr2	0.816	0.795	2.35153e-129	-0.779676
Rplp2	1	0.993	5.97363e-129	0.504551
H2-Aa	0.818	0.414	5.9294e-128	2.16761
Rps12-ps3	0.984	0.756	2.40639e-127	0.822689
Msrb1	0.733	0.762	2.84326e-126	-1.29683
Rpl13a	1	0.99	3.06035e-126	0.562055
Rpl13a-ps1	0.572	0.138	5.46564e-126	0.57381
Trem2	0.924	0.569	3.17908e-125	1.13315
Msr1	0.393	0.596	8.7738e-125	-1.23415
Prdx5	0.939	0.904	1.23634e-124	-0.968883
Eno1	0.849	0.85	2.28382e-124	-1.01427
Ly86	0.969	0.609	1.23916e-123	0.963106
S100a10	0.796	0.848	9.60608e-123	-1.20234
Rps11	0.999	0.99	3.36921e-121	0.514504
Rpl12	0.997	0.868	4.08267e-121	0.77041
Fcrls	0.71	0.255	4.84737e-121	1.58992
Gm10116	0.969	0.719	2.54297e-120	1.02618
Rpl18a	1	0.997	1.25791e-119	0.539132
Emilin2	0.313	0.563	2.04597e-119	-1.18368
Ppfia4	0.559	0.129	1.55955e-118	0.728447
Rbm8a	0.656	0.634	2.47284e-118	-0.637608
Prdx6	0.603	0.605	4.41211e-118	-0.994387
Timp2	0.834	0.352	6.3172e-118	0.913917
H2-Ab1	0.828	0.508	3.46898e-117	2.05529
Rap1b	0.947	0.891	9.44874e-117	-0.712729
Ldha	0.881	0.868	1.96735e-116	-1.01494
Rpl21	1	0.985	2.40307e-116	0.500724
Blnk	0.499	0.095	8.89763e-116	0.662747
Plac8	0.206	0.611	7.27781e-115	-2.61462
Sec61g	0.95	0.92	2.69425e-114	-0.795423
Itgb2	0.719	0.724	7.15749e-113	-0.822883
F13a1	0.28	0.632	2.1853e-112	-1.60367
Pfn1	0.993	0.994	7.36375e-112	-0.710611
Tgfbr1	0.676	0.222	7.55115e-112	0.661373
Ramp1	0.567	0.169	1.07625e-111	0.505585
Thbs1	0.265	0.604	8.65124e-111	-2.15226
Gatm	0.582	0.156	2.02542e-110	0.722769
Rpl28	1	0.963	3.67706e-110	0.524511
Gsr	0.239	0.53	4.80196e-110	-1.56711
Pea15a	0.716	0.261	1.51898e-109	0.60813
Rps10	0.996	0.966	2.47575e-109	0.542631
Itgb5	0.84	0.376	4.31516e-109	0.755693
Gpr34	0.384	0.049	4.91718e-109	0.674298
Gm2000	0.988	0.731	7.31352e-109	0.719376
Pou2f2	0.778	0.325	1.45547e-108	0.581876
Rpl7a-ps5	0.818	0.354	3.50398e-108	0.754385
Xbp1	0.624	0.651	2.53458e-107	-0.794504
Rps21	0.999	0.957	8.18826e-107	0.514004
Axl	0.553	0.137	9.41369e-107	0.762693
Igf1	0.502	0.111	1.73278e-106	1.18123
Hp	0.065	0.443	9.50932e-106	-2.11106
Rpl29	1	0.94	1.00548e-105	0.520576
St13	0.698	0.632	3.1016e-105	-0.579919
Card19	0.662	0.647	4.8099e-105	-0.760859
Mrpl33	0.839	0.803	9.04702e-105	-0.754348
Bzw1	0.662	0.589	1.63196e-104	-0.509995
Mif	0.77	0.719	2.15591e-104	-0.924445
Atp1a1	0.664	0.652	2.41261e-104	-0.708734
Cox17	0.684	0.665	2.51416e-104	-0.685789
Cd81	0.782	0.335	1.6416e-103	0.6402
Gm11808	0.984	0.717	2.06806e-103	0.722805
S100a4	0.579	0.843	4.22537e-103	-1.19787
Esd	0.791	0.689	4.98699e-103	-0.629515
Usmg5	0.837	0.79	1.88275e-102	-0.621215
Camk1	0.815	0.367	9.73801e-102	0.674293
Cfl1	0.997	0.989	9.86154e-102	-0.60738
Adgre1	0.902	0.525	1.97791e-100	0.889077
Rpl9-ps6	0.985	0.734	2.07033e-100	0.736916
Sepp1	0.982	0.734	8.69285e-100	1.06971
Hspa5	0.855	0.86	8.75388e-100	-1.04299
Lilrb4a	0.828	0.827	2.17624e-99	-0.864776
Fn1	0.52	0.739	3.13123e-99	-1.72396
Rbms1	0.714	0.675	3.41503e-99	-0.634581
Tmcc3	0.436	0.093	3.69489e-99	0.523244
Pitpna	0.843	0.792	4.96655e-99	-0.658377
Ahnak	0.634	0.698	5.17867e-99	-0.942583
Ypel3	0.877	0.446	9.78906e-99	0.72601
Cox7a2l	0.975	0.679	2.63377e-98	0.739017
Samhd1	0.681	0.594	5.45875e-98	-0.653781
Ywhaz	0.599	0.615	7.28869e-98	-0.709982
Clec12a	0.847	0.417	2.62456e-97	0.783745
Lacc1	0.519	0.142	2.76705e-97	0.519804
Cd44	0.594	0.64	3.85877e-97	-0.949646
Ptms	0.824	0.387	2.83172e-96	0.714481
Snx2	0.63	0.578	2.58578e-95	-0.605952
Nme1	0.726	0.735	4.95909e-95	-0.739161
Tmed2	0.87	0.807	7.57992e-95	-0.583721
Unc93b1	0.982	0.72	2.66889e-94	0.739212
Ifitm2	0.964	0.95	2.95535e-94	-0.89432
App	0.785	0.701	2.96091e-94	-0.564711
Tmem86a	0.653	0.247	9.37723e-94	0.514566
Slfn2	0.701	0.765	1.00658e-93	-0.960252
Glrx	0.487	0.466	1.5999e-93	-0.649761
Ctsh	0.996	0.847	1.74694e-93	0.683709
Cap1	0.539	0.542	2.02234e-93	-0.600516
Rpl10a	1	0.945	2.17891e-92	0.551311
C5ar1	0.813	0.799	1.03231e-91	-0.906188
Hnrnpm	0.561	0.626	1.02919e-90	-0.718647
Rnh1	0.775	0.671	2.15681e-90	-0.59895
S100a8	0.264	0.558	2.71871e-90	-4.19752
Abhd12	0.807	0.386	5.80148e-90	0.57609
Tpi1	0.825	0.703	1.89903e-89	-0.636735
Cd74	0.85	0.605	3.62496e-89	1.7475
AW112010	0.596	0.196	4.40865e-89	0.794728
AI662270	0.603	0.588	2.41358e-88	-0.615048
Shfm1	0.991	0.966	3.59387e-88	-0.609626
Ehd4	0.879	0.474	3.84659e-88	0.549291
Cd83	0.604	0.205	1.57445e-87	0.987175
Itm2b	1	0.988	1.58719e-87	0.758197
Myh9	0.519	0.576	1.99847e-87	-0.838381
Ntpcr	0.744	0.323	2.38128e-87	0.717101
Clec4e	0.182	0.484	2.60559e-87	-1.49226
Wdr89	0.993	0.865	4.95604e-87	0.557544
Pdia3	0.871	0.774	1.58343e-86	-0.536592
Pabpc1	0.966	0.935	5.57134e-86	-0.685004
Gnas	0.987	0.786	1.14012e-85	0.65846
Cstb	0.923	0.894	2.0753e-85	-1.03537
Cycs	0.667	0.669	2.19221e-85	-0.660476
Hebp1	0.416	0.089	4.98497e-85	0.519894
Arpc5	0.956	0.916	5.05924e-85	-0.577084
Rpl7a	1	0.925	5.67389e-85	0.522306
Aldoa	0.914	0.894	1.39476e-84	-0.857585
Slamf7	0.396	0.085	1.55392e-84	0.50689
Alox5ap	0.97	0.956	3.8847e-84	-0.688404
Gnb2l1	0.996	0.897	7.06782e-84	0.561875
Plek	0.711	0.679	1.00556e-83	-0.698947
Gm2a	0.889	0.842	1.00647e-83	-0.761945
Rtcb	0.677	0.274	1.43423e-83	0.643443
Rhoa	0.973	0.928	1.53409e-83	-0.559027
Tgm2	0.351	0.473	1.71484e-83	-1.09114
Hif1a	0.397	0.483	3.89791e-83	-0.824066
Hmox1	0.51	0.693	4.09298e-83	-2.04197
Ndufa3	0.859	0.793	6.26019e-83	-0.514255
Ccl2	0.441	0.674	1.18838e-82	-2.2436
Tmem119	0.471	0.119	1.21133e-82	0.785584
B2m	1	0.995	2.66235e-82	0.528656
Snrpd3	0.582	0.573	4.22648e-82	-0.555647
Slc16a3	0.209	0.426	1.85293e-81	-1.12393
Zfos1	0.744	0.342	2.50827e-81	0.557547
Rpl6l	0.967	0.67	3.17701e-81	0.611816
Sub1	0.956	0.897	8.29502e-81	-0.609074
Tpm3	0.941	0.868	1.70515e-80	-0.506965
Sec61b	0.956	0.881	1.88836e-80	-0.514605
Lmo2	0.735	0.334	3.19231e-80	0.538106
Dync1i2	0.593	0.601	3.57013e-80	-0.599202
Lrp1	0.659	0.612	3.16904e-79	-0.5424
Smpdl3a	0.702	0.567	6.94769e-78	-0.508214
Arg1	0.105	0.414	6.73008e-77	-2.93301
Itgam	0.53	0.59	9.31403e-77	-0.788287
Pgam1	0.745	0.731	1.87307e-76	-0.7415
Hsp90b1	0.858	0.813	3.69345e-76	-0.660089
Dnajb11	0.569	0.54	9.83835e-76	-0.508671
Fabp4	0.784	0.402	2.2312e-75	0.5382
Ecm1	0.52	0.525	2.54671e-75	-0.796434
Sptssa	0.828	0.442	4.03852e-75	0.561699
Crip1	0.951	0.927	4.91924e-75	-1.11624
Higd1a	0.517	0.515	1.75134e-74	-0.565177
Manf	0.713	0.682	7.4057e-74	-0.634685
Clec4d	0.308	0.526	9.8008e-74	-1.26932
Cfp	0.542	0.642	3.77566e-73	-0.915591
Plaur	0.21	0.471	4.09155e-73	-1.20255
H2-DMb1	0.72	0.335	4.53441e-73	0.882029
Ap2a2	0.504	0.51	9.265e-73	-0.589071
Zmynd15	0.295	0.042	1.83741e-72	0.540245
Por	0.279	0.43	3.89119e-72	-0.861688
Samsn1	0.324	0.396	5.03934e-72	-0.774579
Taldo1	0.911	0.823	6.38812e-72	-0.550204
Cd63	0.796	0.437	8.10654e-72	1.02292
Ifitm6	0.053	0.338	1.52943e-71	-1.61149
Ccr1	0.415	0.634	2.31642e-71	-1.12339
Ddx21	0.338	0.423	2.37821e-71	-0.671819
Ctsl	0.846	0.765	7.6303e-71	-0.837426
Dok2	0.2	0.438	1.11321e-70	-0.98027
C3ar1	0.901	0.565	3.47283e-70	0.597404
Rpl23a-ps3	0.991	0.872	1.63206e-69	0.544758
Rps28	1	0.993	1.84067e-69	-0.50908
Adam8	0.234	0.411	2.21018e-69	-0.933184
Bcl2a1b	0.856	0.523	3.98907e-69	0.858626
Ms4a6d	0.889	0.786	4.60573e-69	-0.527362
Diaph1	0.422	0.446	6.84929e-69	-0.572236
mt-Atp8	0.267	0.397	3.97945e-68	-0.729078
Dusp3	0.44	0.461	1.0183e-67	-0.614677
Bst1	0.277	0.345	1.3305e-67	-0.591872
Rpl5	0.996	0.885	1.90592e-67	0.509637
Sirpb1c	0.616	0.628	2.0295e-67	-0.749984
Ccnd3	0.338	0.417	2.56217e-67	-0.668195
Rbpj	0.47	0.454	3.38737e-67	-0.508644
Pdia6	0.757	0.74	9.82698e-67	-0.628349
Emb	0.529	0.587	1.43632e-66	-0.767852
Btg1	0.97	0.948	2.16572e-66	-0.828348
Pdia4	0.399	0.425	2.74722e-66	-0.58385
H2-K1	0.997	0.845	2.86345e-66	0.589235
Maf	0.636	0.604	3.68053e-66	-0.710548
Adssl1	0.338	0.425	4.21953e-66	-0.650134
Kras	0.382	0.419	5.60827e-66	-0.542364
Ehd1	0.31	0.468	1.30205e-65	-0.804661
Capg	0.711	0.78	2.9836e-65	-0.730361
H2-DMa	0.834	0.501	6.41869e-65	0.794186
AF251705	0.969	0.711	8.11697e-65	0.55508
Eef1b2	0.984	0.751	9.09205e-65	0.504393
Eif4a1	0.967	0.912	1.4099e-64	-0.54583
Tpm4	0.778	0.713	9.81079e-64	-0.503441
Atp5g2	0.961	0.709	2.49753e-63	0.515857
Hsp90aa1	0.856	0.795	4.61686e-63	-0.542786
Tubb6	0.403	0.501	5.28188e-63	-0.731681
F10	0.053	0.315	5.75298e-63	-1.16325
Slpi	0.058	0.307	7.44054e-63	-1.94262
Rbm47	0.338	0.363	8.52638e-63	-0.553326
Cdk2ap2	0.732	0.665	1.08367e-62	-0.679653
Rpl27-ps3	0.933	0.635	3.85464e-62	0.522948
Fbxl5	0.296	0.334	2.42164e-61	-0.563846
Lilr4b	0.644	0.603	4.90665e-61	-0.518595
Klf3	0.406	0.419	6.05276e-61	-0.524225
Calm1	0.99	0.985	2.3005e-60	-0.566197
Adgre5	0.378	0.362	2.9124e-60	-0.533012
Napsa	0.347	0.459	6.30807e-60	-0.956491
Rgs1	0.726	0.377	5.07821e-59	0.854154
Fgr	0.347	0.353	7.38463e-59	-0.501946
Flna	0.493	0.505	1.21279e-58	-0.550736
Tsc22d3	0.521	0.521	1.45251e-58	-0.632541
S100a9	0.225	0.391	7.11095e-58	-3.75955
Hexa	0.976	0.758	5.52149e-57	0.544563
Pf4	0.677	0.6	1.21034e-56	-1.43954
Ccrl2	0.55	0.223	1.28345e-56	0.673989
Gm9493	0.956	0.721	8.04068e-56	0.519147
Klf2	0.631	0.675	1.3051e-55	-1.11804
Mt1	0.89	0.77	3.64449e-55	-0.610499
Ninj1	0.668	0.652	6.35893e-55	-0.6464
Ltb4r1	0.117	0.352	3.44902e-54	-0.930644
Sdc4	0.436	0.416	3.0253e-53	-0.678893
Nfkbiz	0.655	0.33	3.42211e-53	0.553795
Ccl7	0.265	0.513	4.96214e-53	-2.2446
Syngr1	0.41	0.135	2.22136e-52	0.545616
Plin2	0.855	0.754	3.04255e-52	-0.52383
Pilra	0.48	0.508	7.87878e-52	-0.613427
Ccl4	0.714	0.408	2.67451e-51	1.21975
Ptafr	0.443	0.427	5.51755e-51	-0.56889
Rgs2	0.953	0.705	4.86278e-50	0.508009
Slc39a1	0.324	0.416	7.89247e-50	-0.797258
Hist1h1c	0.345	0.102	1.1759e-49	0.64944
Stk17b	0.576	0.59	3.18717e-49	-0.588113
Serpinb6a	0.434	0.158	9.44517e-49	0.543663
Ccl3	0.668	0.365	1.37404e-48	1.0201
Polr2l	0.329	0.38	1.48382e-48	-0.551831
Sirpb1b	0.396	0.423	1.57994e-48	-0.54531
Mgst1	0.313	0.307	2.03879e-48	-0.640103
Emp1	0.409	0.412	3.84024e-48	-0.628039
Dusp6	0.353	0.401	6.29118e-48	-0.58247
Gm5150	0.219	0.369	1.11861e-47	-0.696962
Mcemp1	0.071	0.274	1.28685e-47	-0.939602
Hist1h2bc	0.428	0.157	2.24336e-47	0.547274
Gadd45b	0.596	0.283	2.82403e-47	0.586365
Ifi204	0.554	0.532	2.13119e-45	-0.558601
Spp1	0.702	0.73	3.94764e-44	-1.67806
Naa15	0.236	0.326	6.72292e-44	-0.50021
Notch2	0.206	0.282	2.3734e-41	-0.649552
Anxa1	0.615	0.614	9.35125e-41	-0.594938
Igfbp6	0.139	0.269	9.87492e-41	-0.648467
Trib1	0.412	0.44	2.21762e-40	-0.508582
Eps8	0.227	0.315	7.58249e-40	-0.533147
Osm	0.351	0.417	1.65781e-38	-0.901611
Ms4a4c	0.418	0.477	4.20256e-38	-0.839908
Gapdh	0.978	0.963	4.81072e-38	-0.518908
Ly6c2	0.136	0.353	2.03207e-36	-1.35918
Kdm6b	0.394	0.403	1.03087e-35	-0.578198
Pim1	0.739	0.676	6.54864e-35	-0.518167
Pyhin1	0.246	0.295	6.93872e-32	-0.548889
Atf3	0.806	0.577	2.09192e-30	0.589278
Nfil3	0.194	0.302	4.23071e-28	-0.539828
Dusp2	0.319	0.129	4.20397e-26	0.50512
Dusp1	0.901	0.897	3.44287e-25	-0.618751
Tppp3	0.209	0.255	1.63255e-24	-0.643615
Cxcl2	0.564	0.677	3.94304e-19	-1.06538
Isg15	0.283	0.277	2.06633e-14	-0.618065
Il1b	0.604	0.709	3.95204e-08	-0.703144
Hspa1a	0.302	0.371	1.2614e-07	-0.671814

## Sheet: M1Mo vs MACs
Gene	pct.1	pct.2	p_val_adj	Log2FoldChange
Hp	0.957	0.286	0	2.34175
Ifitm6	0.9	0.19	2.99846e-299	2.10562
Tmsb10	0.997	0.916	1.04405e-291	1.55667
Plac8	0.977	0.473	1.48703e-289	2.15924
Ifitm3	1	0.962	1.55842e-263	1.09385
Lyz2	1	0.997	1.5754e-228	1.07244
Lgmn	0.671	0.927	1.69491e-228	-1.97854
Mgst1	0.759	0.232	1.61575e-223	1.83568
C1qb	0.198	0.707	1.17888e-221	-4.07708
Ly6c2	0.823	0.233	6.92705e-208	2.01008
Msrb1	0.964	0.723	3.69548e-198	1.27809
C1qc	0.144	0.661	7.96947e-198	-3.723
Ms4a7	0.113	0.68	4.33286e-196	-2.9202
Dab2	0.131	0.735	3.46375e-194	-2.11146
Gsr	0.892	0.414	9.03545e-194	1.54455
C1qa	0.152	0.646	3.16098e-190	-4.10653
Napsa	0.831	0.375	4.43177e-181	1.51696
S100a6	0.997	0.928	2.39525e-174	0.737435
Ctsb	0.961	0.983	4.09841e-168	-1.70805
Pf4	0.237	0.676	5.54819e-168	-3.6596
Cxcl16	0.075	0.618	4.21726e-159	-1.95112
Bcl2a1b	0.105	0.656	1.58232e-156	-1.94869
Actg1	0.998	0.994	4.13051e-153	0.924907
Apoe	0.949	0.983	9.86648e-148	-2.43386
Ifitm2	0.997	0.944	4.01859e-144	0.937319
Ctsd	0.784	0.932	1.65439e-143	-1.87962
Smpdl3a	0.838	0.547	5.20778e-143	1.24611
Ftl1	1	1	6.69964e-142	-1.05948
Mcemp1	0.673	0.169	2.47404e-140	1.35923
C3ar1	0.169	0.694	1.0311e-135	-1.47073
Spp1	0.547	0.756	3.68137e-128	-3.31977
S100a4	0.975	0.772	4.24488e-127	0.991515
Sell	0.468	0.066	7.16862e-125	1.31692
Taldo1	0.941	0.82	1.15826e-120	0.886799
Crip1	0.992	0.92	2.15795e-120	0.966496
Rplp0	0.998	0.994	1.53532e-119	0.583923
Fth1	0.998	1	3.77133e-119	-1.11373
Rps9	1	0.996	1.68698e-118	0.616955
H3f3a	0.997	0.99	1.08723e-116	0.693673
Gm9733	0.516	0.107	1.46936e-114	1.29979
Sepp1	0.661	0.792	2.495e-111	-1.71519
Aif1	0.419	0.789	2.78941e-107	-1.37541
Cd244	0.507	0.121	2.00699e-105	1.19423
Mrpl33	0.9	0.793	2.14356e-105	0.873494
Vcan	0.573	0.156	5.60574e-105	1.29708
Sub1	0.961	0.897	6.56726e-105	0.81197
Cd63	0.119	0.558	8.98547e-104	-1.95362
Trem2	0.293	0.682	1.52851e-103	-1.47965
Chil3	0.889	0.602	3.75286e-102	1.66412
Lsp1	0.933	0.776	8.10304e-101	0.886403
Lgals1	0.833	0.928	4.54312e-100	-1.23559
Coro1a	0.971	0.898	2.87933e-99	0.79361
Emb	0.813	0.538	8.60911e-99	1.03095
Mmp8	0.481	0.109	5.0478e-96	1.16725
Alox5ap	0.99	0.953	2.22904e-94	0.672594
Prdx5	0.975	0.898	4.17067e-93	0.766246
Arhgdib	0.956	0.894	7.33474e-92	0.737041
Fcrls	0.023	0.38	3.09445e-91	-1.91632
Cd52	1	0.979	2.09126e-90	0.531939
Samhd1	0.789	0.577	2.34275e-90	1.00426
Itgb7	0.48	0.13	1.73395e-89	1.04221
Lrg1	0.471	0.149	3.46281e-89	1.76632
Ptpn1	0.836	0.684	7.82328e-89	0.928174
Slpi	0.61	0.209	3.78778e-88	0.933687
Rgs1	0.095	0.489	7.80564e-88	-2.0341
Basp1	0.095	0.511	2.72529e-87	-1.06142
Anxa2	0.957	0.829	2.7264e-87	0.76824
Grn	0.722	0.882	2.13935e-85	-1.03904
Vim	0.982	0.916	2.32037e-82	0.864948
S100a11	0.984	0.895	7.07154e-82	0.678366
Mrc1	0.038	0.397	3.74651e-81	-1.21943
Dhrs3	0.151	0.559	2.28951e-79	-0.989583
Klf13	0.794	0.572	8.40299e-79	0.923477
Dmkn	0.386	0.085	4.24338e-77	1.2927
Ms4a4c	0.761	0.418	7.06723e-75	0.862058
Sirpb1c	0.845	0.589	2.93665e-74	0.933227
Mif	0.462	0.772	1.61521e-71	-1.18019
Arg1	0.101	0.409	1.6648e-70	-2.89048
Hexb	0.453	0.683	2.696e-70	-1.15184
F10	0.586	0.22	2.87808e-70	1.06723
Ppia	0.984	0.985	3.3922e-69	-0.55544
Eif3f	0.903	0.835	3.84424e-69	0.672292
Lair1	0.133	0.511	4.0889e-69	-0.831566
Gm10116	0.55	0.794	2.06605e-68	-1.03496
Cd72	0.015	0.301	5.71377e-68	-1.34457
Ccl12	0.067	0.379	7.37014e-65	-2.05681
Maf	0.303	0.66	1.13121e-64	-1.09058
Cd44	0.812	0.602	3.98557e-64	0.871096
Ccnd3	0.617	0.368	1.21415e-63	0.853182
Slamf9	0.016	0.292	1.27113e-63	-0.992398
Stab1	0.157	0.516	1.06375e-62	-0.886014
Rgs10	0.475	0.738	2.89406e-62	-0.964902
Tarm1	0.344	0.085	1.45035e-60	0.873724
Rab3il1	0.167	0.528	1.60144e-60	-0.792051
Gda	0.817	0.525	1.79972e-60	0.849406
Tmem37	0.065	0.382	2.03754e-60	-0.803101
Ahnak	0.856	0.66	3.35859e-60	0.78825
H2-Eb1	0.209	0.434	6.32189e-60	-3.09933
Itga6	0.016	0.286	1.0207e-59	-0.657494
AF251705	0.507	0.793	3.09596e-58	-0.856995
Pltp	0.09	0.38	1.85806e-57	-1.1176
Abhd12	0.162	0.502	3.82475e-57	-0.829422
Fxyd5	0.987	0.946	5.49759e-57	0.536884
Ncf2	0.781	0.659	1.65189e-56	0.679864
Cytip	0.643	0.361	2.23451e-56	0.85457
H2afz	0.936	0.897	1.988e-55	0.647813
Itgb5	0.16	0.499	7.46436e-55	-0.792392
Klra2	0.488	0.19	1.68582e-54	0.827078
Emilin2	0.732	0.488	2.98049e-54	0.80899
Psma7	0.897	0.827	8.41461e-54	0.592832
Gmfg	0.828	0.648	2.92141e-53	0.713967
Rnase4	0.177	0.503	2.95538e-53	-0.887525
Pea15a	0.08	0.377	3.23649e-53	-0.742005
H2-Aa	0.252	0.517	6.00367e-53	-2.7418
Plaur	0.684	0.386	1.08636e-52	0.915402
H2-Ab1	0.383	0.589	6.21332e-52	-2.45406
Ctsc	0.907	0.933	2.87179e-51	-0.759917
Shfm1	0.98	0.968	4.14703e-51	0.504609
Ccl7	0.252	0.511	4.83599e-51	-2.30772
Zyx	0.615	0.423	4.99725e-51	0.742144
Fcgr4	0.169	0.483	6.25142e-51	-0.884424
Hpgds	0.02	0.26	7.7912e-51	-0.680779
Tmpo	0.439	0.22	1.10945e-49	0.749232
Cdkn2d	0.399	0.17	2.22596e-49	0.784933
Cd9	0.18	0.483	4.17194e-49	-1.22369
Prr13	0.786	0.636	4.65399e-49	0.700518
Anxa3	0.231	0.563	1.19279e-48	-0.782475
Tpd52	0.92	0.837	2.94312e-48	0.612872
Pirb	0.735	0.589	1.43932e-47	0.684948
Ctsl	0.601	0.808	1.47452e-47	-1.08056
Cdk2ap2	0.799	0.654	3.41367e-47	0.723772
Tgfb1	0.759	0.706	4.88065e-47	0.620295
Timp2	0.195	0.468	5.88728e-47	-1.00908
Ptma	0.943	0.971	7.54014e-47	-0.586887
Clec4e	0.678	0.395	1.38643e-46	0.842367
Cd81	0.175	0.446	6.7726e-46	-1.27208
Anxa1	0.763	0.589	7.81074e-46	0.775706
Ptprc	0.805	0.674	1.3376e-45	0.660765
Tubb5	0.442	0.723	2.61374e-45	-0.783295
Abca1	0.059	0.324	2.78583e-45	-0.660016
Mmp14	0.044	0.295	1.4095e-44	-0.617031
Cd74	0.465	0.675	6.82002e-44	-2.35566
Tuba1b	0.563	0.795	9.75238e-44	-0.758045
Slfn2	0.866	0.736	1.17908e-43	0.698849
Lyn	0.797	0.676	2.09917e-43	0.612015
Frmd4b	0.028	0.257	5.45775e-43	-0.539009
Arrb2	0.242	0.558	1.23458e-42	-0.619453
Pi16	0.344	0.109	1.28157e-42	0.687724
Sirpb1b	0.614	0.386	1.45109e-42	0.723963
Esd	0.8	0.689	3.02077e-42	0.664361
Il17ra	0.502	0.245	3.8141e-42	0.723037
Fam49b	0.903	0.828	4.69986e-42	0.549207
Gltscr2	0.668	0.581	9.54767e-42	0.581776
Rnh1	0.777	0.672	1.48466e-41	0.703183
Sdc4	0.175	0.46	1.78898e-41	-0.531831
Tnfrsf1a	0.668	0.541	6.85435e-41	0.601101
Ckb	0.206	0.46	8.46549e-41	-0.944053
Tbxas1	0.08	0.342	8.85295e-41	-0.590859
Sdc3	0.113	0.39	1.12965e-40	-0.694337
Camk1	0.193	0.48	1.44025e-40	-0.697759
Gatm	0.039	0.256	1.63791e-40	-0.713265
Cstb	0.853	0.906	1.869e-40	-0.876264
S100a10	0.935	0.823	2.02475e-39	0.549733
C3	0.342	0.116	2.30786e-39	0.668319
Uap1l1	0.1	0.362	2.92714e-39	-0.621405
H2afj	0.812	0.701	4.39277e-39	0.601737
Malat1	1	0.999	9.29149e-39	-0.523154
Tmem86a	0.092	0.349	1.32325e-38	-0.592286
Slc25a5	0.928	0.871	2.16834e-38	0.507162
Dbi	0.923	0.846	2.44814e-38	0.535674
Ms4a6c	0.953	0.871	4.73913e-38	0.535962
Plbd1	0.728	0.498	5.08047e-38	0.665226
Ecm1	0.298	0.563	7.93933e-38	-0.871678
Cybb	0.818	0.64	1.88722e-37	0.621434
Ybx1	0.921	0.966	3.48116e-37	-0.502206
Marcksl1	0.25	0.526	5.90915e-37	-0.947001
Btg1	0.974	0.948	9.94543e-37	0.524721
Eif3h	0.858	0.779	1.21521e-36	0.500479
Cd177	0.291	0.082	2.5009e-36	0.635919
Akr1a1	0.787	0.883	6.96948e-36	-0.588496
Tppp3	0.439	0.216	1.4547e-35	0.896663
Snx5	0.496	0.726	2.08482e-35	-0.657834
Ptms	0.219	0.497	3.14041e-35	-0.656407
Diaph1	0.584	0.418	5.74781e-35	0.642496
Naaa	0.525	0.34	1.0951e-34	0.664298
Ccl4	0.242	0.493	2.08538e-34	-1.65718
C1galt1c1	0.27	0.132	2.16942e-34	0.538302
AI839979	0.314	0.123	2.70328e-34	0.619455
Pla2g15	0.067	0.294	3.1645e-34	-0.507693
Tmem106a	0.264	0.537	3.16863e-33	-0.605083
Lipa	0.182	0.437	6.64195e-33	-0.619358
Ntpcr	0.167	0.428	6.94283e-33	-0.616834
Cnn2	0.614	0.485	1.25998e-32	0.582798
Cd84	0.244	0.512	2.18642e-32	-0.577092
Tpm4	0.771	0.716	4.20531e-32	0.531029
Glipr2	0.391	0.172	4.87213e-32	0.672055
Tpi1	0.529	0.755	5.77108e-32	-0.718737
Adgre5	0.553	0.332	7.12511e-32	0.652383
Ccl3	0.203	0.449	9.85208e-32	-1.30896
Bcl2l1	0.098	0.33	1.32415e-31	-0.596556
Ywhaz	0.73	0.592	1.95986e-31	0.572692
Mef2c	0.196	0.444	4.36268e-31	-0.655115
Ehd4	0.314	0.577	5.20025e-31	-0.642767
Emp1	0.191	0.449	6.35721e-31	-0.733471
BC028528	0.509	0.353	1.13076e-30	0.588315
F13a1	0.771	0.543	1.27727e-30	0.575059
Gyg	0.396	0.225	1.67353e-30	0.600802
Adap2os	0.195	0.453	1.95574e-30	-0.524752
Xbp1	0.736	0.631	1.04284e-29	0.556214
Bin2	0.592	0.443	1.30374e-29	0.569204
St3gal4	0.327	0.158	1.51522e-29	0.572142
Cd302	0.579	0.458	1.54198e-29	0.534568
Aldh2	0.684	0.568	2.24349e-29	0.548524
Sdcbp	0.874	0.929	3.07711e-29	-0.538904
Tspan13	0.444	0.232	5.22367e-29	0.672066
Irf5	0.658	0.561	9.1213e-29	0.502126
Nrp1	0.191	0.437	1.73596e-28	-0.671473
Bri3bp	0.282	0.11	2.57039e-28	0.539661
Clic4	0.11	0.326	4.10797e-28	-0.531062
Adgre1	0.435	0.61	6.64046e-28	-0.66891
Blvrb	0.28	0.509	7.74504e-28	-0.644276
Fcgrt	0.123	0.292	9.44332e-28	-0.617862
Fgr	0.535	0.321	9.68591e-28	0.602546
Pld3	0.1	0.32	1.72868e-27	-0.500923
Csf2rb	0.484	0.331	1.83676e-27	0.603474
Kdm7a	0.535	0.384	2.01405e-27	0.587186
Cx3cr1	0.208	0.425	2.40046e-27	-0.807191
Plin2	0.624	0.794	2.59323e-27	-0.713409
P2rx4	0.242	0.494	2.95382e-27	-0.578269
Rnf149	0.704	0.625	3.51558e-27	0.547297
Myadm	0.334	0.219	7.79785e-27	0.539881
S100a9	0.321	0.372	8.56914e-27	-2.8691
Map2k3	0.455	0.333	1.32634e-26	0.544335
Smox	0.396	0.265	2.54526e-26	0.628386
Wnk1	0.399	0.648	2.97882e-26	-0.532187
Gpr35	0.393	0.219	3.37881e-26	0.573801
Sirpa	0.437	0.669	5.5559e-26	-0.55721
2310022A10Rik	0.308	0.178	6.13914e-26	0.521939
Bin1	0.142	0.371	8.56899e-26	-0.507661
Cfp	0.46	0.654	9.42588e-26	-0.705747
Kdm6b	0.534	0.379	1.4313e-25	0.734574
Fam49a	0.283	0.122	2.87264e-25	0.529892
Dnaja1	0.854	0.785	6.56013e-25	0.56702
Tubb2a	0.172	0.401	1.48098e-24	-0.513129
Fam129b	0.378	0.267	1.57351e-24	0.524404
Aldoa	0.84	0.907	5.99531e-24	-0.575821
Rara	0.337	0.156	6.4988e-24	0.513019
Mmp19	0.264	0.131	8.5239e-24	0.653335
Jarid2	0.409	0.287	1.06148e-23	0.553833
Lgals3bp	0.173	0.385	6.58487e-23	-0.541621
Dcn	0.198	0.303	6.67844e-23	0.577744
Pebp1	0.386	0.613	6.76656e-23	-0.504086
Adora2b	0.265	0.123	7.32488e-23	0.553172
Trem3	0.309	0.126	1.00336e-22	0.540983
Pim1	0.802	0.667	1.38856e-22	0.60312
Acp5	0.087	0.266	1.85371e-22	-0.612743
Bcl3	0.309	0.189	4.13716e-22	0.517925
Fcgr2b	0.584	0.772	6.45468e-22	-0.540225
Cd93	0.255	0.475	8.08379e-22	-0.531904
Samsn1	0.527	0.36	1.04347e-21	0.529433
Cd83	0.113	0.295	1.73322e-21	-0.723937
Mt1	0.624	0.817	2.02069e-21	-0.580353
Gcnt2	0.324	0.162	2.58151e-21	0.504006
Txnip	0.224	0.407	2.69664e-21	-0.598432
Gstm1	0.38	0.236	3.61166e-21	0.55043
Bst2	0.427	0.609	1.9297e-20	-0.592811
Ccrl2	0.121	0.302	1.08626e-19	-0.732205
Snx2	0.416	0.615	1.41559e-19	-0.508228
Cd36	0.105	0.288	1.55865e-19	-0.638318
Lat2	0.35	0.56	4.71219e-19	-0.512257
Ltb4r1	0.476	0.287	1.85119e-18	0.554888
Ccr1	0.678	0.586	7.73643e-18	0.55203
Bcl2a1d	0.09	0.252	1.21279e-17	-0.504534
Gpcpd1	0.35	0.224	2.06226e-16	0.502094
Gadd45b	0.198	0.355	1.21115e-15	-0.625736
Lpl	0.128	0.276	1.51554e-15	-0.669369
Fabp5	0.352	0.478	2.66747e-15	-1.08077
S100a8	0.589	0.498	1.22121e-14	-1.77785
Clec4n	0.367	0.519	8.6258e-12	-0.618579
Fabp4	0.322	0.487	5.8212e-10	-0.542661
Ly6a	0.18	0.31	3.34533e-09	-0.58514
Cxcl2	0.542	0.679	4.62215e-08	-0.708459
Ccl2	0.529	0.655	1.22687e-07	-0.773967

## Sheet: MAC-TR vs MACs
Gene	pct.1	pct.2	p_val_adj	Log2FoldChange
Cd81	0.996	0.372	1.41814e-261	2.72518
Mgl2	0.767	0.027	8.36897e-204	3.04149
C1qa	1	0.55	2.99422e-164	1.9034
C1qc	1	0.562	2.17886e-157	1.91292
Serinc3	0.953	0.572	3.59557e-144	1.65939
Hspa1a	0.767	0.336	4.29424e-143	2.72325
Lgals3	0.53	0.966	2.49036e-138	-2.57223
C1qb	1	0.612	3.11986e-132	1.47027
Lilra5	0.597	0.029	1.11741e-130	1.82435
Hpgd	0.797	0.128	5.67629e-127	2.0617
Fcgrt	0.72	0.241	9.566e-113	1.80853
Sepp1	0.975	0.761	3.65544e-110	1.96866
St3gal6	0.623	0.071	1.54387e-106	1.48206
Trf	0.928	0.501	1.24903e-105	1.81251
Fn1	0.072	0.742	4.16291e-101	-3.14591
Cst3	1	0.99	3.61018e-95	1.26095
Tmem176b	0.958	0.416	1.13223e-93	1.76764
Cbr2	0.627	0.122	1.31596e-93	2.21503
Folr2	0.538	0.126	1.09036e-92	2.21141
Chil3	0.038	0.679	1.65081e-92	-4.33577
Spp1	0.127	0.761	1.20923e-89	-4.10701
Tmsb10	0.665	0.943	3.21449e-88	-2.17149
Sirpb1c	0.03	0.661	9.20609e-87	-2.00164
Mef2c	0.847	0.382	9.73732e-87	1.43178
Igfbp4	0.716	0.161	1.36652e-86	1.5938
Ccr2	0.136	0.78	4.72392e-86	-1.93684
Pmp22	0.627	0.124	1.63175e-84	1.53033
Jund	0.941	0.703	3.33847e-83	1.43119
Cfh	0.682	0.169	9.27236e-83	1.52603
S100a6	0.678	0.953	1.29943e-79	-1.90235
Serpinf1	0.466	0.052	6.75382e-79	1.25455
Txnip	0.801	0.356	4.69223e-78	1.51052
Pkm	0.716	0.936	8.33406e-78	-1.73888
Fxyd2	0.381	0.024	8.79205e-78	1.26334
Cstb	0.648	0.914	4.17991e-77	-2.00052
Timp2	0.852	0.404	4.96884e-75	1.51526
Slco2b1	0.415	0.045	2.64234e-74	0.992146
Tmem176a	0.869	0.329	1.05958e-73	1.57953
Csf1r	0.949	0.758	5.96226e-73	1.15125
Msrb1	0.28	0.786	9.29278e-71	-2.03939
Slamf9	0.737	0.223	3.32355e-69	1.49855
Aprt	0.339	0.807	3.73874e-69	-1.63581
Ctsd	0.72	0.922	1.03322e-68	-2.14125
Jun	0.877	0.735	2.48571e-68	1.58268
Prdx5	0.678	0.923	5.90337e-68	-1.47961
Thbs1	0.038	0.58	1.21233e-67	-2.7057
Gas6	0.636	0.169	6.7223e-67	1.57887
Plac8	0.042	0.576	8.8165e-67	-3.5528
Klf2	0.903	0.654	2.88445e-66	1.74085
Lyve1	0.271	0.006	2.09055e-62	1.80719
Sult1a1	0.309	0.016	9.42128e-62	0.818533
Pf4	0.97	0.591	2.51524e-61	0.835086
Anxa2	0.508	0.868	1.43288e-60	-1.70443
Dcn	0.708	0.263	3.65561e-60	1.10792
S100a11	0.708	0.92	1.12517e-59	-1.69978
S100a4	0.326	0.829	2.23561e-59	-1.66026
Cd163	0.356	0.024	2.01203e-58	1.16127
H2-Eb1	0.797	0.378	3.6656e-58	2.38212
Gsn	0.911	0.721	6.68242e-58	1.04447
Srgn	0.801	0.958	2.16208e-57	-1.69166
Gatm	0.64	0.2	9.77686e-57	1.33864
Cyba	0.97	0.992	7.21496e-55	-0.739201
Mgp	0.72	0.297	1.15234e-54	1.27092
Cd74	0.894	0.629	5.11718e-54	2.43323
Emb	0.093	0.606	6.7437e-54	-1.50796
Clec4d	0.042	0.517	4.57391e-53	-1.80362
Igf1	0.589	0.149	4.99029e-51	1.32495
H2-Aa	0.822	0.458	1.90826e-50	2.14383
Smagp	0.538	0.183	6.11858e-48	1.06676
Xlr	0.305	0.02	1.01508e-47	0.826331
Gda	0.123	0.594	2.08268e-47	-1.55001
Plin2	0.432	0.79	3.7346e-47	-1.53082
Sdcbp	0.788	0.929	9.39618e-47	-1.06594
Gpr34	0.419	0.083	1.29343e-46	1.06958
Tgfbi	0.814	0.906	1.42479e-46	-1.4098
H2-Ab1	0.831	0.543	3.12799e-46	2.04773
Alox5	0.352	0.035	6.4439e-46	0.81848
Napsa	0.03	0.465	1.79608e-45	-1.57659
Clec4e	0.025	0.46	2.84447e-45	-1.69335
Sirpb1b	0.017	0.442	4.19616e-45	-1.21197
Serpinb6a	0.597	0.179	4.47747e-45	1.15343
Ms4a4c	0.081	0.491	2.71087e-44	-1.81099
Taldo1	0.555	0.854	3.57984e-44	-1.20336
Shfm1	0.869	0.976	9.40831e-44	-0.810744
Ms4a6d	0.593	0.814	3.2428e-43	-1.28143
mt-Nd2	0.966	0.904	5.60875e-43	0.826279
Trim47	0.547	0.19	6.15541e-43	0.940329
Aldoa	0.699	0.909	7.63562e-43	-1.25952
Tgm2	0.055	0.477	1.03259e-42	-1.52675
Egr1	0.758	0.498	5.90458e-42	1.36935
Pltp	0.686	0.318	6.42628e-42	1.30524
Arg1	0.004	0.386	1.43448e-41	-3.27273
Hp	0.017	0.405	1.63758e-41	-2.12894
Mrc1	0.733	0.322	5.22873e-41	1.18638
Grap	0.305	0.034	9.20409e-41	0.674312
Arpc1b	0.962	0.997	8.41533e-40	-0.622625
Pgam1	0.415	0.752	2.91367e-39	-1.26683
Gngt2	0.331	0.726	5.34856e-39	-1.33856
Prdx6	0.25	0.625	3.07971e-38	-1.37506
Ctsl	0.661	0.785	4.44295e-38	-1.40242
Plaur	0.055	0.451	4.74635e-38	-1.41055
Pea15a	0.61	0.318	9.78671e-38	0.973644
Itm2b	1	0.989	1.67237e-37	0.813647
Gm5150	0.004	0.365	1.69135e-37	-1.05144
Gsr	0.161	0.502	1.88847e-37	-1.55971
Fam96a	0.364	0.72	2.30226e-37	-1.08311
Ctss	0.983	0.98	6.39707e-37	-0.781818
Ldha	0.678	0.881	6.91714e-37	-1.19984
Cd83	0.64	0.246	8.81755e-37	1.2577
Mif	0.47	0.743	1.26994e-36	-1.36112
Runx1	0.602	0.335	2.49312e-36	1.01038
Fabp4	0.814	0.442	1.01738e-35	1.27022
Fth1	1	1	1.39936e-35	-0.877454
Rgs10	0.924	0.686	2.22462e-35	0.889131
Zfhx3	0.53	0.189	2.45719e-35	0.922114
Adam8	0.03	0.403	2.7953e-35	-1.21171
Sec61b	0.682	0.906	2.89126e-35	-0.916115
Cd52	0.928	0.985	4.43301e-35	-0.905101
Ccr1	0.225	0.621	4.99685e-35	-1.40516
Emilin2	0.148	0.545	3.23536e-34	-1.2042
Marcksl1	0.775	0.469	4.63081e-34	1.15084
Rhoc	0.53	0.196	8.50887e-34	0.973348
Rplp0	1	0.994	1.05777e-33	-0.653075
Gapdh	0.919	0.968	1.91167e-33	-0.891035
Blvrb	0.699	0.463	3.88323e-33	0.952073
Fgr	0.021	0.371	4.22973e-33	-0.991887
Ltb4r1	0.004	0.333	4.90196e-33	-1.09406
Atp5l	0.847	0.959	7.54578e-33	-0.713418
Eno1	0.644	0.862	8.77419e-33	-1.12187
Malat1	1	0.999	9.69804e-33	0.685017
Mrpl52	0.572	0.842	2.136e-32	-0.961959
Dynll1	0.847	0.943	3.41095e-32	-0.815743
Hif1a	0.106	0.491	6.75023e-32	-1.14199
H2-DMa	0.78	0.541	8.07441e-32	1.10006
S100a8	0.267	0.526	2.07176e-31	-4.08946
Gm2a	0.627	0.862	2.10247e-31	-1.04754
Serf2	0.962	0.991	2.93347e-31	-0.527861
Ifi30	0.521	0.811	1.04571e-30	-1.0804
Stard8	0.339	0.078	1.14888e-30	0.732109
Bin1	0.576	0.324	1.22856e-30	0.837171
Sesn1	0.373	0.117	1.42241e-30	0.740665
Ly6c2	0.025	0.335	1.86868e-30	-1.81399
Sec61g	0.805	0.932	2.24445e-30	-0.8591
H3f3a	0.979	0.991	1.14825e-29	-0.638364
Ftl1	1	1	1.26933e-29	-0.793707
Pim1	0.343	0.707	4.16561e-29	-1.19823
Apoe	0.996	0.977	5.69187e-29	0.725141
Osm	0.072	0.426	6.02476e-29	-1.49042
Fcrls	0.691	0.307	6.99509e-29	0.679174
Adssl1	0.068	0.431	7.60932e-29	-0.960053
mt-Nd1	1	0.976	1.00297e-28	0.609026
Ubc	0.975	0.911	2.79506e-28	0.810948
Bgn	0.407	0.126	5.12868e-28	0.655652
Sub1	0.737	0.916	6.38685e-28	-0.851051
Cx3cr1	0.661	0.378	9.35509e-28	1.0865
Gm8730	0.661	0.869	1.27076e-27	-0.874501
Pfn1	0.987	0.994	1.47233e-27	-0.53309
Ms4a6c	0.691	0.894	2.12585e-27	-0.957497
Cited2	0.674	0.411	2.24665e-27	1.05901
Lifr	0.36	0.112	2.53773e-27	0.755914
F10	0.004	0.289	9.98139e-27	-1.17825
Klf6	0.797	0.744	1.47077e-26	0.920714
Nfil3	0.021	0.301	2.1585e-26	-0.833642
Igfbp7	0.657	0.337	2.40378e-26	0.819393
Capg	0.441	0.789	3.81358e-26	-0.97095
Ehd4	0.775	0.525	3.8969e-26	0.819736
Frmd4b	0.487	0.208	5.45314e-26	0.802264
mt-Nd4	0.992	0.968	1.33532e-25	0.574817
F13a1	0.665	0.571	1.55007e-25	1.03299
Ier2	0.788	0.761	1.70127e-25	0.952136
mt-Cytb	0.996	0.979	1.88072e-25	0.573407
Slc16a3	0.081	0.41	1.9193e-25	-1.16703
Fgd2	0.424	0.176	3.19957e-25	0.741823
Btg2	0.932	0.824	4.06832e-25	0.937841
Man2b1	0.797	0.536	4.507e-25	0.799411
Rnh1	0.492	0.699	6.38529e-25	-0.870598
Nenf	0.525	0.274	1.4936e-24	0.72883
Fxyd5	0.881	0.956	3.80878e-24	-0.713926
Slc25a5	0.746	0.887	4.74164e-24	-0.781866
Rhob	0.538	0.287	6.19692e-24	0.862025
Creb5	0.381	0.145	7.92278e-24	0.778603
Adgre1	0.831	0.57	9.39804e-24	0.829803
Smpdl3a	0.339	0.604	1.00908e-23	-1.06451
Rpl36al	0.864	0.948	1.07594e-23	-0.653605
Atox1	0.843	0.948	1.87927e-23	-0.660836
Tspo	0.826	0.926	2.09892e-23	-0.767369
Nfkbiz	0.606	0.368	2.21543e-23	0.977481
Itm2c	0.758	0.506	2.59636e-23	0.738214
Cd44	0.331	0.651	2.62904e-23	-1.04698
Nme1	0.479	0.749	4.16415e-23	-0.904615
Glrx	0.157	0.488	4.20505e-23	-0.995651
Selm	0.369	0.106	4.36645e-23	0.699024
Ccl24	0.331	0.08	7.97584e-23	0.7254
Bin2	0.148	0.484	1.03913e-22	-0.854469
Gpr35	0.008	0.258	1.04027e-22	-0.716195
Ltc4s	0.356	0.099	3.0242e-22	0.965251
Lmo2	0.602	0.386	7.78047e-22	0.730375
Cd300lf	0.004	0.251	1.24293e-21	-0.761594
Vim	0.788	0.933	1.63745e-21	-0.945822
Card19	0.403	0.664	2.58736e-21	-0.877555
Anxa1	0.347	0.629	3.60336e-21	-1.06516
Ifitm6	0.055	0.306	3.86847e-21	-1.47074
Pepd	0.547	0.345	4.17568e-21	0.690591
Txn1	0.686	0.845	5.31179e-21	-0.82804
Psap	0.992	0.985	6.53729e-21	-0.641689
Ecm1	0.216	0.542	6.70579e-21	-1.09061
Slpi	0.021	0.282	7.32012e-21	-1.84634
Fabp5	0.229	0.474	7.32762e-21	-1.84899
Slc9a9	0.347	0.104	8.29648e-21	0.635342
Hmgn1	0.496	0.217	9.23617e-21	0.757057
Ptpn1	0.424	0.723	1.13416e-20	-0.860802
Lilrb4a	0.686	0.835	1.4922e-20	-0.857381
Nr4a2	0.025	0.289	1.77478e-20	-0.881558
Itgb2	0.492	0.737	2.24728e-20	-0.845078
Esd	0.5	0.717	2.5305e-20	-0.826486
Rnase4	0.703	0.441	2.91678e-20	0.794497
Ccnd1	0.449	0.169	2.96637e-20	0.807893
Mcemp1	0.013	0.255	2.99925e-20	-0.978067
Rin2	0.428	0.179	3.37485e-20	0.71181
Abca9	0.271	0.059	3.8819e-20	0.589484
H2-DMb1	0.661	0.381	4.86958e-20	0.994739
Cycs	0.394	0.685	7.40356e-20	-0.853423
Tmcc1	0.589	0.279	8.74422e-20	0.775236
Rnf149	0.377	0.652	9.96313e-20	-0.865658
Hmox1	0.542	0.671	1.10991e-19	-1.81626
Cfp	0.309	0.645	1.69691e-19	-0.93395
Btg1	0.89	0.955	1.80868e-19	-0.852898
Rab20	0.085	0.387	1.8989e-19	-0.863577
Mrpl33	0.61	0.821	2.75838e-19	-0.767844
Ly6c1	0.415	0.154	2.87707e-19	0.768889
Prdx1	0.919	0.943	2.97167e-19	-0.853089
Ptpro	0.436	0.175	3.7623e-19	0.708594
Lum	0.331	0.095	3.97691e-19	0.589894
Gas7	0.525	0.255	4.20223e-19	0.739153
Tmcc3	0.377	0.134	4.38955e-19	0.713429
Cdk2ap2	0.419	0.69	5.89543e-19	-0.996284
S100a9	0.25	0.372	8.00523e-19	-3.45218
Ckb	0.72	0.406	8.74417e-19	0.809901
Ostf1	0.784	0.9	9.0736e-19	-0.631466
Itgam	0.331	0.595	1.11046e-18	-0.840073
AB124611	0.309	0.598	1.27969e-18	-0.773779
Tpd52	0.686	0.858	1.71453e-18	-0.717994
Ctsb	0.979	0.98	1.94856e-18	-0.82695
Lyl1	0.487	0.228	2.12387e-18	0.726053
Soat1	0.161	0.464	2.22196e-18	-0.800185
Sgpp1	0.322	0.111	2.51686e-18	0.631671
Prelid1	0.551	0.788	2.9728e-18	-0.731291
Cd36	0.542	0.245	3.00546e-18	0.809082
Axl	0.462	0.189	3.33716e-18	0.745776
Chmp4b	0.525	0.757	3.75674e-18	-0.717055
Cox5a	0.61	0.833	4.11596e-18	-0.68475
Ptp4a1	0.191	0.501	4.49985e-18	-0.784094
Kctd12	0.708	0.462	4.66973e-18	0.721997
Rbm3	0.614	0.844	9.81578e-18	-0.708001
Lgmn	0.924	0.888	1.13421e-17	-0.71492
Clec4b1	0.271	0.085	1.16352e-17	0.690501
Tomm20	0.496	0.732	1.57448e-17	-0.734947
Pabpc1	0.86	0.945	1.60549e-17	-0.657378
Cxcl2	0.352	0.677	2.10128e-17	-0.646404
Ppp1r15a	0.513	0.348	2.36049e-17	0.781114
Cotl1	0.924	0.96	2.74878e-17	-0.579073
Vkorc1	0.39	0.181	2.76261e-17	0.580039
Pycard	0.496	0.722	2.76398e-17	-0.760826
Cytip	0.123	0.418	3.05077e-17	-0.896487
Cebpb	0.297	0.533	3.69496e-17	-0.90872
Slc29a1	0.403	0.164	8.45656e-17	0.593689
Il17ra	0.051	0.296	8.95839e-17	-0.71169
Por	0.148	0.421	1.29053e-16	-0.868181
Cox6b1	0.835	0.933	1.55573e-16	-0.555144
AI662270	0.314	0.607	1.77112e-16	-0.743561
H2afj	0.462	0.732	2.19194e-16	-0.729083
Cyp27a1	0.271	0.094	2.40209e-16	0.525456
Rabac1	0.775	0.6	3.56512e-16	0.630193
Mxd4	0.466	0.264	3.93755e-16	0.668272
Tma7	0.725	0.889	4.13123e-16	-0.611092
Wwp1	0.432	0.2	4.39826e-16	0.699311
Litaf	0.436	0.697	6.98758e-16	-0.693056
Ccnd2	0.394	0.147	7.36525e-16	0.875986
Scimp	0.381	0.169	8.50249e-16	0.781339
Hpgds	0.487	0.21	9.21241e-16	0.685038
Serp1	0.568	0.778	9.387e-16	-0.69728
Ifitm3	0.903	0.971	1.09924e-15	-0.889019
Ifi27	0.492	0.299	1.18378e-15	0.690659
Il1b	0.415	0.709	1.83809e-15	-1.21288
Msr1	0.347	0.576	1.99459e-15	-0.876593
Gpr183	0.432	0.227	2.33957e-15	0.738168
Unc93b1	0.89	0.755	2.51607e-15	0.612425
Mmp14	0.038	0.272	3.76839e-15	-0.54498
Rps18-ps3	0.373	0.67	4.63417e-15	-0.687637
Samsn1	0.131	0.399	5.04692e-15	-0.861034
Nrp1	0.644	0.387	5.04751e-15	0.760838
Laptm4a	0.89	0.716	5.58808e-15	0.557171
Lacc1	0.394	0.191	5.75323e-15	0.629401
Acp5	0.034	0.252	6.73245e-15	-0.760744
Fam129b	0.064	0.296	6.97121e-15	-0.661553
mt-Nd3	0.839	0.696	8.50299e-15	0.586013
H2-Q4	0.297	0.098	9.69544e-15	0.539284
Ptgs1	0.305	0.101	1.00234e-14	0.529858
Plek	0.466	0.697	1.07721e-14	-0.792992
Cd86	0.644	0.41	1.31317e-14	0.699168
Ccl6	0.775	0.894	1.37182e-14	-1.31324
Usmg5	0.597	0.81	1.41578e-14	-0.642002
Lst1	0.78	0.898	1.47578e-14	-0.6895
Rab32	0.14	0.413	1.60365e-14	-0.730155
Fam49b	0.712	0.846	1.64269e-14	-0.647583
Mbnl1	0.737	0.591	2.0356e-14	0.597472
Slfn2	0.576	0.766	2.26909e-14	-0.78095
Zbtb20	0.356	0.138	3.88027e-14	0.596674
Nr4a1	0.233	0.526	6.2593e-14	-0.871543
Prcp	0.614	0.4	6.54798e-14	0.623732
Tpi1	0.564	0.732	8.24457e-14	-0.782882
Zfp36l1	0.742	0.563	8.9336e-14	0.679899
Fcgr3	0.958	0.902	9.13338e-14	0.525194
Ly6e	0.746	0.902	1.39653e-13	-0.694344
Adrb2	0.496	0.229	1.5983e-13	0.630523
Atf4	0.589	0.452	2.05193e-13	0.60438
Bmyc	0.407	0.214	2.65197e-13	0.599815
Irf1	0.386	0.177	3.5625e-13	0.702542
Abi3	0.114	0.378	3.59609e-13	-0.583877
Sephs2	0.085	0.297	3.59861e-13	-0.616909
Cd151	0.381	0.183	3.74756e-13	0.539233
Dhrs3	0.703	0.488	3.8649e-13	0.633619
Mrpl54	0.305	0.571	4.68537e-13	-0.618379
Higd1a	0.284	0.529	5.19037e-13	-0.672709
Abhd12	0.674	0.44	8.47142e-13	0.606525
Ywhaz	0.381	0.626	1.21459e-12	-0.682671
Cyth4	0.792	0.591	1.26098e-12	0.564061
Acvrl1	0.347	0.183	1.68241e-12	0.5284
Pid1	0.907	0.781	2.05679e-12	0.579661
Cox17	0.445	0.681	2.21907e-12	-0.66122
Selenbp1	0.275	0.097	2.50211e-12	0.56061
Cd93	0.233	0.456	2.55456e-12	-0.699512
Furin	0.119	0.349	2.88085e-12	-0.695397
Eif4a1	0.864	0.925	2.90655e-12	-0.586371
Mat2a	0.691	0.543	4.8937e-12	0.588035
Atp1a1	0.462	0.666	6.26388e-12	-0.634322
Dab2	0.835	0.637	8.32087e-12	0.590786
Cox5b	0.699	0.862	8.51177e-12	-0.543565
Atp5f1	0.703	0.821	9.05831e-12	-0.53692
Tgfbr2	0.428	0.215	9.74405e-12	0.571661
Gng11	0.314	0.124	1.03557e-11	0.686581
Nt5dc2	0.072	0.293	1.04404e-11	-0.6407
Ccr5	0.623	0.45	1.05916e-11	0.657918
Stab1	0.657	0.452	1.07319e-11	0.650781
Atp6v0e	0.771	0.889	1.12547e-11	-0.516984
Tubb2a	0.534	0.358	1.13528e-11	0.613543
Uqcrq	0.661	0.818	1.18467e-11	-0.571461
Gstm1	0.475	0.244	1.44816e-11	0.542031
Samhd1	0.436	0.618	1.6567e-11	-0.705807
Tmem37	0.525	0.325	2.00778e-11	0.647911
Hspb1	0.263	0.091	2.30822e-11	0.617405
1110008F13Rik	0.5	0.719	2.40558e-11	-0.583727
Camk1	0.623	0.427	2.67576e-11	0.590616
Ube2d3	0.733	0.901	2.74635e-11	-0.502353
Actg1	0.992	0.995	3.01167e-11	-0.579662
Ifngr2	0.415	0.662	3.29622e-11	-0.613749
Actr2	0.653	0.807	3.39717e-11	-0.592904
Myl12a	0.822	0.922	4.11145e-11	-0.521444
Fosl2	0.144	0.373	4.15771e-11	-0.658816
Atp5g1	0.606	0.784	4.6915e-11	-0.583973
Wdr89	0.763	0.892	4.70174e-11	-0.51923
Crip2	0.267	0.087	5.68775e-11	0.503867
Tsc22d3	0.674	0.512	5.79864e-11	0.631188
Ndel1	0.212	0.443	8.50051e-11	-0.61227
Cox7b	0.623	0.797	8.60385e-11	-0.559483
Ndufa1	0.492	0.687	8.66676e-11	-0.553117
Glul	0.699	0.516	8.79638e-11	0.609201
Rpl9-ps6	0.568	0.786	1.04552e-10	-0.582424
Hexb	0.843	0.638	1.43818e-10	0.628718
Batf3	0.288	0.113	1.53768e-10	0.517535
Alox5ap	0.924	0.96	1.61961e-10	-0.510993
Csf2rb	0.144	0.366	1.62565e-10	-0.630165
Hnrnpa2b1	0.703	0.853	1.68965e-10	-0.551987
Irf7	0.114	0.312	1.87646e-10	-0.888019
Snx5	0.839	0.684	1.9843e-10	0.535728
Nr3c1	0.419	0.234	1.99329e-10	0.561461
AI467606	0.318	0.12	2.85376e-10	0.536293
Rab11fip5	0.373	0.167	2.93612e-10	0.533601
Psma7	0.682	0.846	5.18297e-10	-0.522297
Id2	0.254	0.469	5.211e-10	-0.930916
Trappc2l	0.297	0.524	5.5186e-10	-0.535181
Ccl9	0.716	0.851	5.53634e-10	-0.931741
Gng12	0.178	0.391	7.0655e-10	-0.57166
Map2k3	0.153	0.362	7.67949e-10	-0.536562
Maf	0.797	0.598	8.2418e-10	0.556109
Srsf5	0.763	0.629	8.48001e-10	0.531018
Pdia6	0.653	0.748	8.65999e-10	-0.624858
Pitpna	0.661	0.808	9.41952e-10	-0.548568
H2afv	0.462	0.293	9.46791e-10	0.530831
Erh	0.492	0.685	9.8e-10	-0.566439
Pdlim1	0.309	0.125	1.00158e-09	0.544353
Ppp1r10	0.398	0.228	1.05986e-09	0.552367
Gm10076	0.725	0.62	1.06592e-09	0.504172
Lpl	0.475	0.241	1.09423e-09	0.636556
Fcgr1	0.568	0.679	1.23987e-09	-0.612559
Dynll2	0.318	0.166	1.27407e-09	0.5102
Ist1	0.127	0.332	1.48823e-09	-0.541055
Sec14l1	0.424	0.227	1.6202e-09	0.515291
Hnrnpm	0.436	0.626	1.70144e-09	-0.576226
Fis1	0.458	0.654	2.11254e-09	-0.506378
Tmem14c	0.559	0.744	2.30879e-09	-0.552188
Mgst1	0.14	0.318	2.79757e-09	-0.829398
Ndufb2	0.347	0.568	2.81257e-09	-0.520044
Adipor1	0.449	0.619	3.00639e-09	-0.523944
Rgs1	0.203	0.446	3.27607e-09	-0.584646
Leprot	0.513	0.349	4.4262e-09	0.505352
Clec4n	0.373	0.504	4.48881e-09	-0.850051
Shisa5	0.699	0.851	5.26883e-09	-0.521499
Ptp4a2	0.72	0.565	6.15336e-09	0.506585
Dnajc15	0.267	0.501	7.32694e-09	-0.530637
Clec5a	0.441	0.257	8.22325e-09	0.546357
Atp6v1g1	0.708	0.856	9.56652e-09	-0.503127
Cmpk1	0.504	0.689	1.03841e-08	-0.52766
Klf4	0.686	0.53	1.05947e-08	0.749485
Fam46a	0.517	0.36	1.11708e-08	0.638996
Ccl7	0.258	0.486	1.11848e-08	-1.62719
Uba52	0.636	0.474	1.26123e-08	0.531335
H2afy	0.415	0.627	1.28166e-08	-0.568601
Arhgap31	0.373	0.188	1.37572e-08	0.518894
Mpeg1	0.606	0.783	1.48779e-08	-0.574083
Ier5	0.809	0.75	1.88292e-08	0.557497
Lrrfip1	0.309	0.532	2.41111e-08	-0.572714
Smox	0.14	0.293	2.51438e-08	-0.54467
Cyb5a	0.636	0.461	2.54101e-08	0.524203
Lgals1	0.873	0.917	3.7478e-08	-0.658359
Atf3	0.627	0.613	4.07558e-08	0.712415
Cap1	0.318	0.555	5.81029e-08	-0.533601
Marcks	0.86	0.72	5.92795e-08	0.518467
P2ry6	0.763	0.583	6.02714e-08	0.514971
Camk2d	0.225	0.451	6.05325e-08	-0.56848
Ifi27l2a	0.962	0.825	8.99988e-08	0.626451
Txnrd1	0.127	0.301	9.73731e-08	-0.543061
Tuba1a	0.593	0.392	9.92773e-08	0.513602
S100a10	0.72	0.847	1.02342e-07	-0.67789
Ufm1	0.195	0.409	2.31524e-07	-0.502655
Fos	0.924	0.967	2.9743e-07	0.514535
Diaph1	0.25	0.453	4.04909e-07	-0.514621
Picalm	0.508	0.695	4.43096e-07	-0.537646
Bola2	0.479	0.672	4.62099e-07	-0.534125
Psmb3	0.525	0.709	5.30377e-07	-0.507387
Lrp1	0.445	0.63	6.00935e-07	-0.518534
Trem2	0.555	0.63	6.02503e-07	-0.598522
Actb	1	1	6.9554e-07	-0.681088
Chd7	0.136	0.317	7.5906e-07	-0.547259
Cd33	0.394	0.202	1.11946e-06	0.519369
Cyp4f18	0.263	0.486	1.14315e-06	-0.585827
Fosb	0.61	0.523	1.27113e-06	0.591431
Creg1	0.568	0.691	1.36992e-06	-0.513182
Ezr	0.182	0.355	1.7402e-06	-0.52052
Tbcb	0.369	0.577	1.78448e-06	-0.506482
Rap2b	0.284	0.481	2.34093e-06	-0.548029
Rpl10-ps3	0.716	0.834	2.59926e-06	-0.533191
Gadd45b	0.462	0.325	3.85304e-06	0.651635
Pyhin1	0.127	0.296	4.38067e-06	-0.609379
Kdm7a	0.233	0.416	5.95001e-06	-0.507311
Ms4a6b	0.614	0.734	6.29852e-06	-0.511404

## Sheet: MAC6 vs MACs
Gene	pct.1	pct.2	p_val_adj	Log2FoldChange
S100a9	0.976	0.339	0	7.34727
S100a8	1	0.491	0	7.04644
Cxcr2	0.698	0.024	1.594e-143	2.66127
G0s2	0.645	0.074	7.70466e-136	4.0916
Hdc	0.657	0.036	3.16471e-132	2.5919
Retnlg	0.533	0.023	3.15497e-128	4.89905
Mmp9	0.775	0.063	1.02413e-124	2.8965
Csf3r	0.698	0.163	2.57262e-118	1.95846
Ctss	0.621	0.995	1.49167e-103	-1.30946
Rpl13	0.923	0.999	2.88702e-102	-0.772064
Il1r2	0.604	0.048	1.305e-98	2.60526
Rps19	0.888	0.998	3.69243e-94	-0.781551
S100a11	1	0.904	9.34204e-94	1.94784
Lcn2	0.485	0.07	2.68475e-88	3.91884
2310001H17Rik	0.533	0.149	8.4857e-86	1.74034
Lyz2	0.941	1	6.26166e-84	-1.09237
Rps23	0.953	0.999	3.41317e-82	-0.611169
Rpl41	1	1	6.33766e-82	-0.519154
Eef1a1	0.929	0.999	1.26984e-79	-0.827443
Pglyrp1	0.639	0.076	2.0516e-79	2.72448
Slpi	0.817	0.245	3.32644e-79	2.92907
Psap	0.751	0.995	8.61837e-79	-1.15428
Cd24a	0.669	0.159	4.03307e-78	2.06134
Mxd1	0.675	0.16	3.36403e-77	1.99373
Gm5483	0.355	0.014	5.14017e-77	3.66633
Rps18	0.852	0.996	2.71056e-76	-0.845484
Msrb1	0.976	0.749	3.11976e-75	1.83501
Ctsc	0.432	0.95	5.8567e-75	-1.75675
Stfa2l1	0.337	0.005	6.47807e-69	2.7079
Rplp0	0.911	0.998	9.65269e-68	-0.867855
Il1f9	0.343	0.007	5.77724e-66	1.9989
Rps28	0.888	0.999	4.47946e-65	-0.603839
Rpl32	0.893	0.997	1.99577e-64	-0.801598
Rpl6	0.828	0.994	2.31904e-64	-0.857542
Wfdc21	0.544	0.09	5.65855e-63	3.09334
Rpl14	0.817	0.987	1.70748e-61	-0.908037
Ifitm1	0.586	0.173	3.56838e-60	2.8983
Hcar2	0.337	0.038	9.07067e-59	1.75634
Rpl10	0.929	0.995	1.00435e-58	-0.819267
Il1b	0.899	0.684	1.02308e-58	2.3082
Hmgb2	0.704	0.478	1.19734e-58	1.51679
Grina	0.621	0.379	3.94268e-58	1.3902
Cdk2ap2	0.888	0.666	3.94952e-58	1.64926
Rpl37a	0.947	0.999	2.97715e-57	-0.529941
Rpl3	0.68	0.979	8.23282e-57	-1.05661
Ms4a6c	0.361	0.905	1.10085e-56	-1.31634
Gsn	0.769	0.731	2.50855e-55	1.87851
Rps4x	0.734	0.992	5.01765e-55	-0.913291
Asprv1	0.29	0.008	1.47953e-54	1.69478
Ltb	0.426	0.043	2.36502e-54	1.69191
Cd9	0.817	0.424	2.93411e-54	1.91617
Rps8	0.917	0.997	3.65883e-54	-0.598196
Rps5	0.876	0.995	1.67303e-53	-0.72437
H2-Q10	0.385	0.024	2.52567e-53	1.42809
Ctsb	0.775	0.988	5.92358e-53	-1.49811
Tnfaip2	0.633	0.277	6.24115e-53	1.6568
Chil1	0.29	0.009	3.43552e-52	1.36978
Rpl35	0.71	0.985	1.46318e-51	-0.882117
Rps6	0.899	0.998	9.78693e-51	-0.716399
Lgmn	0.456	0.908	7.48767e-50	-1.58613
2810474O19Rik	0.592	0.399	1.37488e-49	1.34915
Rpl26	0.864	0.995	1.45369e-49	-0.717954
Nudt4	0.349	0.15	1.55695e-49	1.2068
Rpl19	0.905	0.996	1.93928e-48	-0.699619
Npc2	0.633	0.959	2.58099e-48	-1.1136
Irg1	0.266	0.011	6.25105e-47	2.04004
Rps15a	0.888	0.997	8.00672e-47	-0.631582
Ptgs2	0.479	0.145	2.56581e-46	1.89069
Rps14	0.935	1	2.83958e-46	-0.568429
Vasp	0.716	0.565	6.08372e-45	1.13738
Apoe	0.864	0.982	1.00968e-44	-2.17917
Slc7a11	0.568	0.166	2.33999e-43	2.03635
Map1lc3b	0.787	0.757	6.88107e-43	0.91863
Tpt1	0.959	0.999	1.02207e-42	-0.534609
Rps11	0.905	0.995	2.91599e-42	-0.674087
Stk17b	0.751	0.581	3.32333e-42	1.19278
Txn1	0.917	0.833	3.75006e-42	1.13361
Lgals1	0.544	0.93	4.14446e-42	-1.32841
Gmfg	0.828	0.668	4.68474e-42	1.13591
Rps2	0.828	0.991	6.06646e-42	-0.745893
F630028O10Rik	0.355	0.083	1.06057e-41	1.31525
Cd33	0.538	0.199	3.05144e-41	1.27114
Ms4a6d	0.314	0.822	6.47907e-41	-1.32794
Tyrobp	1	1	9.28261e-41	0.697183
Rps7	0.87	0.989	1.04148e-40	-0.756044
Arg2	0.379	0.06	1.85051e-40	1.33902
1600010M07Rik	0.391	0.127	6.6411e-40	1.17365
Hsp90ab1	0.651	0.964	7.09034e-40	-0.956976
Rac2	0.899	0.779	7.46887e-40	1.02526
Ctsh	0.467	0.888	9.19718e-40	-1.25356
Rpl4	0.698	0.973	2.25978e-39	-0.848812
Rpl10a	0.669	0.965	5.04533e-39	-0.920462
Hspa8	0.905	0.992	6.65638e-39	-0.81886
Dhrs7	0.467	0.243	6.88168e-39	1.03904
Gsr	0.858	0.467	7.72104e-39	1.44246
Rpl17	0.923	0.995	1.33459e-38	-0.656323
Rpl23a	0.905	0.996	3.08838e-38	-0.574997
Mgp	0.337	0.32	4.54385e-38	1.76856
Aif1	0.237	0.756	8.76665e-38	-1.41784
Sorl1	0.497	0.173	1.2559e-37	1.24615
Hmgn2	0.379	0.28	1.32036e-37	1.06003
Mafb	0.343	0.832	1.44957e-37	-1.30429
Fpr2	0.402	0.092	2.72861e-37	1.28822
Prdx1	0.633	0.954	3.87277e-37	-0.622982
Lmnb1	0.527	0.208	6.77745e-37	1.37983
Pnrc1	0.74	0.644	1.12978e-36	1.06221
Rpl13a	0.888	0.996	7.64859e-36	-0.59731
Ccl9	0.408	0.861	1.18082e-35	-1.4529
Trem1	0.509	0.168	3.70613e-35	1.4459
C1qb	0.266	0.649	6.79157e-35	-2.95881
Lamp1	0.675	0.951	7.63852e-35	-0.980939
Rpl27a	0.899	0.993	9.21027e-35	-0.572722
Rps24	0.84	0.994	1.73073e-34	-0.636139
Ppia	0.834	0.991	1.8572e-34	-0.706601
Rpl8	0.888	0.994	2.70878e-34	-0.52877
Lrg1	0.604	0.179	5.50984e-34	1.7946
Rps17	0.84	0.986	5.84763e-34	-0.644077
Dab2	0.166	0.668	6.10215e-34	-1.55485
Ccrl2	0.408	0.27	1.26478e-33	1.59337
Ctsz	0.598	0.928	3.48605e-33	-0.828321
Pid1	0.349	0.807	4.63545e-33	-1.18285
Cd68	0.473	0.886	6.00118e-33	-1.04489
Gadd45a	0.296	0.084	9.52855e-33	1.22452
Rpl23	0.911	0.997	2.29906e-32	-0.632256
Gadd45b	0.462	0.327	2.80419e-32	1.52036
C3ar1	0.148	0.638	4.95893e-32	-1.3445
C1qc	0.172	0.604	6.93375e-32	-2.81889
Ppp1r2	0.491	0.39	9.58474e-32	0.877005
Akr1a1	0.491	0.885	1.32274e-31	-1.02911
Rps3	0.917	0.992	1.44626e-31	-0.543117
Hcst	0.509	0.265	2.12906e-31	1.07872
Dcn	0.373	0.284	4.91002e-31	1.992
Rpl36	0.852	0.99	6.87446e-31	-0.531491
Egr1	0.763	0.502	7.97688e-31	1.37569
Trem2	0.172	0.645	9.24579e-31	-1.52422
Rpl11	0.864	0.989	1.04103e-30	-0.675693
Snap23	0.574	0.512	1.85006e-30	0.829815
Rpl24	0.817	0.991	2.02186e-30	-0.597968
Adipor1	0.734	0.604	5.4383e-30	0.916908
Anxa5	0.45	0.863	5.52518e-30	-0.961864
Sepp1	0.426	0.788	9.61345e-30	-1.95626
Cks2	0.396	0.149	1.00649e-29	1.24288
Dbi	0.467	0.873	1.18134e-29	-0.916497
Rpl29	0.722	0.959	1.20998e-29	-0.808729
Grn	0.521	0.873	1.67159e-29	-1.17237
Rps20	0.757	0.977	2.29078e-29	-0.684419
C1qa	0.178	0.591	2.39609e-29	-3.11404
Cxcl16	0.112	0.557	2.60128e-29	-1.61996
Rpl7a	0.68	0.948	3.31319e-29	-0.838438
Rpl7	0.781	0.982	3.44022e-29	-0.639658
Ccr2	0.302	0.762	3.90171e-29	-1.24508
Txnip	0.604	0.371	7.31079e-29	1.19564
Ifi30	0.385	0.812	2.13634e-28	-1.1146
Gpsm3	0.698	0.611	2.45862e-28	0.817188
Rpsa	0.751	0.973	2.62708e-28	-0.739288
Ctsa	0.367	0.803	2.71655e-28	-1.00297
Cxcr4	0.485	0.208	3.0561e-28	1.1169
Gnb2l1	0.598	0.926	3.49244e-28	-0.83936
Fcgr2b	0.308	0.763	4.39657e-28	-1.01375
Ms4a7	0.16	0.616	6.95086e-28	-1.88763
Mcemp1	0.574	0.228	8.08634e-28	1.35828
Dusp1	0.923	0.896	1.34561e-27	1.20448
Cd82	0.314	0.155	1.82913e-27	0.914255
Ncf1	0.562	0.456	2.34262e-27	0.884799
Tsc22d3	0.704	0.514	2.80719e-27	1.12907
Hp	0.746	0.368	3.68835e-27	1.52746
Clec4e	0.68	0.425	3.98013e-27	1.43401
Ier2	0.905	0.756	4.34047e-27	1.10625
Cd300lf	0.485	0.227	5.32405e-27	1.13717
Nfkbia	0.763	0.759	5.76224e-27	1.48588
Fcgr1	0.237	0.691	8.26562e-27	-1.14209
Npm1	0.426	0.822	1.07349e-26	-1.01476
AA467197	0.533	0.165	1.46448e-26	1.6675
Rplp1	0.923	0.996	1.53687e-26	-0.585801
Ybx1	0.787	0.966	2.25444e-26	-0.770962
Rpl34	0.911	0.996	2.29983e-26	-0.525992
Ftl1	1	1	4.25309e-26	-0.517442
Zeb2	0.367	0.795	5.71753e-26	-0.925026
Maf	0.178	0.627	7.62378e-26	-1.01234
S100a4	0.402	0.818	1.11364e-25	-1.09662
Selplg	0.633	0.583	1.67068e-25	0.826099
Mir142hg	0.266	0.062	1.72286e-25	0.958765
Hist1h2bc	0.42	0.191	1.97725e-25	1.22212
Tmsb10	0.639	0.94	2.00621e-25	-0.690348
Ms4a6b	0.308	0.745	2.63498e-25	-1.0003
Ly86	0.254	0.684	2.72156e-25	-1.25949
R3hdm4	0.391	0.3	2.94709e-25	0.788093
Rpl18a	0.97	0.998	3.11056e-25	-0.531767
Rpl36al	0.675	0.955	1.30674e-24	-0.604536
Ptma	0.775	0.975	1.57009e-24	-0.671478
Rpl36a	0.698	0.955	1.60568e-24	-0.650529
Rpl31	0.822	0.98	1.77953e-24	-0.607906
Crip1	0.639	0.943	2.94327e-24	-0.694321
Samsn1	0.556	0.377	3.05115e-24	1.09837
Eif1	1	0.991	3.83639e-24	0.669792
Snx5	0.29	0.709	3.99813e-24	-1.06594
Taldo1	0.911	0.834	4.19229e-24	0.889639
Rps3a1	0.899	0.995	9.7531e-24	-0.516682
1810058I24Rik	0.574	0.512	1.50172e-23	0.725945
Csf1r	0.373	0.786	1.61625e-23	-0.901853
Rpl28	0.763	0.977	2.02206e-23	-0.565041
Trem3	0.45	0.141	2.10754e-23	1.13791
Gm26740	0.432	0.328	2.58965e-23	0.838411
Ube2b	0.592	0.574	2.8858e-23	0.654975
Rgs10	0.314	0.716	3.4104e-23	-1.14873
Amica1	0.26	0.045	3.75269e-23	1.06808
Mt1	0.414	0.805	3.81899e-23	-1.19049
Pld4	0.296	0.719	4.40813e-23	-0.997671
Fam32a	0.586	0.515	1.19002e-22	0.753237
Sirpb1b	0.544	0.413	1.33884e-22	0.925684
Slfn1	0.491	0.212	1.60033e-22	1.11321
Rpl5	0.609	0.915	1.93553e-22	-0.715911
Tmem256	0.349	0.745	2.22912e-22	-0.949072
Snx2	0.195	0.603	2.41876e-22	-1.04144
Rpl18	0.84	0.988	2.88859e-22	-0.541002
Sell	0.432	0.111	4.47e-22	1.18498
P2ry6	0.189	0.61	5.21048e-22	-0.864765
Gm8730	0.538	0.871	5.85237e-22	-0.871564
Calr	0.521	0.856	7.40291e-22	-0.972528
Rpl15	0.574	0.894	1.27028e-21	-0.75559
Sdf2l1	0.225	0.635	1.82001e-21	-1.12719
Rps26	0.828	0.98	4.10701e-21	-0.568554
Pdia6	0.367	0.758	4.44196e-21	-0.983247
Hsp90b1	0.467	0.835	5.81521e-21	-0.836379
Clta	0.704	0.943	5.90097e-21	-0.695196
Rpl6l	0.325	0.733	6.02464e-21	-0.81523
Igfbp7	0.426	0.352	6.6018e-21	1.14342
Tgfbi	0.615	0.913	1.18043e-20	-0.900238
Actn1	0.254	0.067	1.38838e-20	0.746959
Cd48	0.26	0.669	1.42838e-20	-0.896235
Srgn	0.959	0.949	2.13496e-20	1.03978
S100a10	0.509	0.853	2.99062e-20	-0.961742
Rpl12	0.604	0.901	3.1001e-20	-0.74366
Cndp2	0.225	0.632	3.70682e-20	-0.890202
Fgl2	0.479	0.24	6.81996e-20	1.04485
Eif4a1	0.686	0.931	6.92533e-20	-0.798987
Marcksl1	0.592	0.482	7.55484e-20	1.29229
Emp3	0.627	0.912	9.20803e-20	-0.757761
Tmem106a	0.124	0.513	9.53767e-20	-0.90376
Prdx2	0.29	0.691	1.22126e-19	-0.808251
Txndc17	0.302	0.698	1.79521e-19	-0.756335
Cxcl2	0.746	0.656	2.26956e-19	2.01087
Gcnt2	0.385	0.177	3.25938e-19	0.966147
Hexa	0.467	0.807	3.29878e-19	-0.918151
Igfbp6	0.373	0.243	4.36989e-19	0.963972
Ccdc109b	0.172	0.566	5.48914e-19	-0.820553
Rps18-ps3	0.272	0.669	7.52363e-19	-0.803774
Pf4	0.272	0.626	8.03343e-19	-2.2358
Rrbp1	0.479	0.831	8.13883e-19	-0.706248
F13a1	0.207	0.591	9.30621e-19	-1.24769
Clec4a3	0.302	0.691	1.39777e-18	-0.758719
Mthfsl	0.308	0.278	2.11214e-18	0.554473
Tuba1b	0.42	0.776	3.60677e-18	-0.901195
Cd52	0.988	0.982	4.19526e-18	0.755225
Ahnak	0.32	0.703	4.21457e-18	-0.799729
Rab3il1	0.118	0.49	5.29365e-18	-0.896855
Ehd4	0.172	0.554	6.73043e-18	-0.893634
Klf2	0.828	0.661	8.46505e-18	1.1717
Lat2	0.166	0.545	1.13365e-17	-0.781181
Lgals3	0.793	0.948	1.16615e-17	-1.05547
Cox17	0.716	0.666	1.2408e-17	0.713391
Cd37	0.385	0.327	1.33115e-17	0.651277
Sh3bgrl	0.302	0.688	1.36305e-17	-0.750767
Slc25a5	0.592	0.892	1.58868e-17	-0.62479
Adgre1	0.219	0.6	1.66427e-17	-0.965115
Plp2	0.367	0.246	2.08862e-17	0.759351
Metrnl	0.402	0.769	2.33415e-17	-0.769801
Rab7b	0.13	0.497	3.2724e-17	-0.854024
Myl12b	0.692	0.735	4.98264e-17	0.574112
Tpi1	0.379	0.736	6.03237e-17	-0.945704
Prr13	0.704	0.656	1.0577e-16	0.805326
Anxa1	0.568	0.616	1.40211e-16	0.788294
Snx20	0.503	0.445	1.4135e-16	0.652529
Rpl10-ps3	0.556	0.839	1.55915e-16	-0.914358
Slfn4	0.266	0.067	1.59951e-16	0.969004
Fyb	0.467	0.811	1.62607e-16	-0.700041
Irf8	0.213	0.588	2.32707e-16	-0.838175
Btg1	0.97	0.951	2.91724e-16	0.824348
Nme1	0.391	0.748	3.23297e-16	-0.778133
Pygl	0.361	0.18	3.34169e-16	0.824545
Eif3i	0.213	0.585	3.55512e-16	-0.696385
Rabac1	0.609	0.61	3.68806e-16	0.552504
Supt4a	0.598	0.546	3.74955e-16	0.611665
Capza2	0.639	0.904	3.88362e-16	-0.645862
H2-DMa	0.213	0.569	4.38942e-16	-1.04602
Fkbp2	0.207	0.579	4.79561e-16	-0.766844
Asah1	0.32	0.689	4.97922e-16	-0.641306
Naca	0.692	0.932	5.95742e-16	-0.56012
Pltp	0.065	0.35	6.59307e-16	-1.09978
Arhgdia	0.485	0.817	6.74931e-16	-0.659004
Sephs2	0.373	0.281	6.92544e-16	0.777587
Clec4d	0.651	0.484	9.0763e-16	1.14775
Atp2b1	0.402	0.754	9.17288e-16	-0.508817
Pxn	0.343	0.266	1.01085e-15	0.651479
Tubb5	0.343	0.696	1.18393e-15	-0.88877
Cox7c	0.68	0.93	1.33036e-15	-0.502645
Trim30b	0.266	0.06	1.44498e-15	0.750234
AI662270	0.237	0.605	1.48248e-15	-0.796019
Eef2	0.669	0.918	1.72354e-15	-0.628272
Msr1	0.219	0.578	2.23889e-15	-0.730027
Mrpl23	0.201	0.565	2.44176e-15	-0.702399
Mpeg1	0.444	0.786	2.51358e-15	-0.5689
Hspa5	0.609	0.87	2.64266e-15	-0.958353
Prdx5	0.899	0.91	3.36865e-15	0.68123
Lbr	0.349	0.184	3.47052e-15	0.785205
Mcl1	0.793	0.82	3.50806e-15	0.614459
Pdia3	0.473	0.803	3.74249e-15	-0.72688
Neurl3	0.337	0.351	3.77307e-15	0.516167
Erp29	0.467	0.801	4.10803e-15	-0.67841
Il10rb	0.308	0.667	5.96096e-15	-0.618846
Ccl2	0.296	0.651	6.57483e-15	-1.5764
Il1rn	0.408	0.221	7.98883e-15	1.42331
Ssr4	0.438	0.778	1.10846e-14	-0.64433
Ets2	0.337	0.281	1.23163e-14	0.648854
Ucp2	0.497	0.818	1.33083e-14	-0.652309
Mmp8	0.278	0.158	1.33469e-14	1.17242
Clec4a1	0.266	0.626	1.64959e-14	-0.706508
Fam107b	0.379	0.216	1.73942e-14	0.798096
Cyfip1	0.195	0.551	1.74401e-14	-0.729009
Tgfb1	0.379	0.728	2.06263e-14	-0.720197
Cnn2	0.527	0.502	2.18855e-14	0.629395
Sdc4	0.118	0.431	2.20871e-14	-1.1391
Nfkbid	0.284	0.212	2.29945e-14	0.657164
Atp5a1	0.438	0.775	2.35852e-14	-0.629485
Rpl23a-ps3	0.645	0.901	2.4761e-14	-0.612586
Tmem37	0.053	0.348	2.79198e-14	-0.79991
Ogfrl1	0.391	0.325	3.0824e-14	0.640707
Adap2os	0.107	0.429	3.28936e-14	-0.674365
Cebpa	0.107	0.42	3.30787e-14	-0.749121
Pitpna	0.497	0.813	3.34332e-14	-0.646553
Sepw1	0.355	0.703	4.28036e-14	-0.553027
Junb	0.982	0.96	4.4533e-14	0.861194
Fn1	0.391	0.717	4.70459e-14	-1.22586
Tmem176b	0.154	0.459	5.08553e-14	-1.49056
Tmem261	0.13	0.464	6.18181e-14	-0.764741
Eef1g	0.58	0.863	6.49338e-14	-0.630971
Adap2	0.071	0.372	6.72212e-14	-0.767422
Unc93b1	0.462	0.775	6.72715e-14	-0.802614
Pycard	0.385	0.723	8.7148e-14	-0.678394
Ecm1	0.225	0.537	9.36554e-14	-0.957551
Cyp4f18	0.55	0.47	9.76585e-14	0.771585
Pim1	0.728	0.685	1.06099e-13	0.878059
Uqcrb	0.556	0.853	1.25972e-13	-0.557924
Dok2	0.101	0.413	1.30788e-13	-0.92573
Siglece	0.266	0.118	1.34879e-13	0.688475
Fam134b	0.402	0.284	1.39857e-13	0.680935
Pbxip1	0.349	0.253	1.62476e-13	0.658582
Ccr5	0.142	0.473	1.65267e-13	-0.841736
Eif3e	0.331	0.675	2.07845e-13	-0.722773
Gm2000	0.485	0.784	2.56266e-13	-0.750828
Bax	0.42	0.744	2.75296e-13	-0.670407
Zfp36l2	0.645	0.68	3.10576e-13	0.626658
Ypel3	0.621	0.51	3.50503e-13	0.750099
Btg2	0.893	0.827	3.83665e-13	0.898929
Ppib	0.533	0.823	3.87166e-13	-0.678293
Fpr1	0.266	0.06	5.26469e-13	0.763566
Ddx5	0.882	0.906	5.28552e-13	0.546736
Serbp1	0.485	0.801	6.20706e-13	-0.559532
Gdi2	0.562	0.846	6.94919e-13	-0.625522
Set	0.308	0.648	7.23417e-13	-0.737338
Tmem86a	0.053	0.323	7.43727e-13	-0.679536
Malat1	1	0.999	7.48814e-13	0.563068
Ndufa4	0.55	0.844	8.23169e-13	-0.546795
Neat1	0.799	0.81	8.27075e-13	0.752887
Necap2	0.183	0.512	8.62699e-13	-0.737816
Rps27l	0.651	0.902	9.51319e-13	-0.53828
Fermt3	0.172	0.499	1.03935e-12	-0.650305
Abhd12	0.142	0.466	1.30566e-12	-0.710806
Sec61g	0.71	0.933	1.48236e-12	-0.505187
Stab1	0.154	0.477	1.48523e-12	-0.714229
Rap2b	0.16	0.482	1.5444e-12	-0.663002
AI607873	0.249	0.581	1.76713e-12	-0.744887
Rgs1	0.142	0.445	1.96663e-12	-1.58093
Gm9493	0.467	0.77	1.98127e-12	-0.709913
March7	0.308	0.212	2.35668e-12	0.610619
Zfp36	0.899	0.812	2.40226e-12	0.785191
Atg3	0.515	0.471	2.62198e-12	0.560184
Pttg1	0.314	0.221	2.79811e-12	0.576562
Hint1	0.58	0.857	3.33154e-12	-0.564749
Csrnp1	0.325	0.264	3.3338e-12	0.73038
Comt	0.166	0.486	3.65966e-12	-0.605597
Eif3h	0.497	0.803	4.11559e-12	-0.575404
Vim	0.769	0.932	4.25077e-12	-0.83052
Nmt1	0.254	0.579	5.68311e-12	-0.51241
Ncl	0.385	0.708	5.98472e-12	-0.702586
Mrc1	0.071	0.356	6.07059e-12	-0.895681
Clec5a	0.308	0.266	6.55215e-12	0.619698
Hprt	0.26	0.594	6.68622e-12	-0.621015
Pilra	0.633	0.498	8.62071e-12	0.765458
Ptprc	0.74	0.691	9.03421e-12	0.653904
Ndufc2	0.331	0.662	9.63674e-12	-0.656077
Ctsl	0.521	0.789	9.72345e-12	-0.999608
Cx3cr1	0.112	0.405	1.10264e-11	-0.993352
Cd300ld	0.426	0.403	1.17773e-11	0.578424
P2rx4	0.154	0.47	1.19208e-11	-0.743838
Glul	0.219	0.539	1.23969e-11	-0.762228
H2-DMb1	0.112	0.409	1.37548e-11	-1.1035
Fcrls	0.077	0.339	1.7227e-11	-1.51207
Fxyd5	0.953	0.952	1.83138e-11	0.584627
Atp5g1	0.497	0.786	1.83661e-11	-0.671299
Eif3f	0.58	0.856	2.00093e-11	-0.506074
Srsf2	0.467	0.738	2.1966e-11	-0.595975
Laptm5	0.757	0.931	2.2456e-11	-0.516024
Tmem176a	0.101	0.37	2.40805e-11	-1.10715
Rassf4	0.154	0.457	2.91152e-11	-0.742581
Litaf	0.663	0.684	2.94449e-11	0.539
Gltp	0.325	0.652	3.09258e-11	-0.586246
Shisa5	0.58	0.853	3.30168e-11	-0.505746
Gpcpd1	0.414	0.235	3.69552e-11	0.813884
Nlrp3	0.331	0.205	3.97371e-11	0.739744
Atp5d	0.503	0.788	4.13675e-11	-0.588739
Cd74	0.379	0.655	4.15956e-11	-2.3076
Sep15	0.485	0.786	4.37736e-11	-0.571839
Rnf149	0.663	0.635	4.3842e-11	0.636112
Ppp1r15a	0.361	0.357	4.69048e-11	0.596486
Plekho1	0.172	0.476	5.23281e-11	-0.545709
Lair1	0.16	0.469	5.95976e-11	-0.682566
Aprt	0.503	0.793	6.83619e-11	-0.650862
Gusb	0.331	0.652	6.9314e-11	-0.652419
Nubp1	0.053	0.311	6.99716e-11	-0.538918
Tbxas1	0.053	0.315	7.70397e-11	-0.631859
Cyth4	0.296	0.615	8.75778e-11	-0.545711
Epn1	0.213	0.527	9.45293e-11	-0.549086
Lrpap1	0.154	0.458	1.00791e-10	-0.660258
App	0.42	0.727	1.06389e-10	-0.605816
Capns1	0.515	0.799	1.11828e-10	-0.591586
Stard3nl	0.124	0.415	1.1875e-10	-0.629184
Psmd8	0.355	0.674	1.3045e-10	-0.575814
Hmox2	0.201	0.512	1.42171e-10	-0.55701
Manf	0.402	0.699	1.45491e-10	-0.79438
Pepd	0.089	0.367	1.46901e-10	-0.618949
Mrpl33	0.811	0.809	1.77769e-10	0.587244
Irf5	0.272	0.587	1.78441e-10	-0.570573
H2-Ab1	0.337	0.568	2.28857e-10	-2.35054
Gm10263	0.379	0.688	2.4332e-10	-0.554348
Fkbp1a	0.391	0.702	2.59204e-10	-0.553062
Dhrs3	0.207	0.512	2.76919e-10	-0.714416
Mydgf	0.201	0.504	2.95098e-10	-0.510055
Ptpn18	0.544	0.822	3.41465e-10	-0.547306
Srsf9	0.225	0.534	3.49146e-10	-0.554316
Arl4c	0.237	0.542	3.93352e-10	-0.581486
Ntpcr	0.118	0.401	4.33343e-10	-0.617157
Ywhae	0.55	0.825	4.49029e-10	-0.510824
Pdia4	0.142	0.432	4.98518e-10	-0.676521
Snx3	0.515	0.798	5.5142e-10	-0.564548
Tubb6	0.201	0.497	6.02743e-10	-0.776491
Cmtm3	0.124	0.411	6.36983e-10	-0.607984
Hspe1	0.402	0.707	6.92267e-10	-0.593481
Tagln2	0.556	0.816	8.35736e-10	-0.684108
Klf4	0.243	0.551	8.38711e-10	-0.782342
Fam96a	0.408	0.712	9.0172e-10	-0.518212
Sparc	0.296	0.259	9.21705e-10	0.813094
Mrpl54	0.26	0.568	1e-09	-0.546552
Slfn2	0.775	0.754	1e-09	0.666892
1110008P14Rik	0.337	0.211	1.10918e-09	0.587212
Glrx3	0.172	0.464	1.15316e-09	-0.523762
Rpl13-ps3	0.296	0.595	1.29413e-09	-0.589616
S100a6	0.947	0.937	1.36539e-09	0.832585
Pkib	0.053	0.287	1.4277e-09	-0.561256
Cd93	0.166	0.455	1.6052e-09	-0.654754
Lgals3bp	0.101	0.365	1.64859e-09	-0.676296
Ifi204	0.249	0.548	1.65876e-09	-0.541097
Hmox1	0.379	0.676	1.73132e-09	-0.977841
Atp5o	0.402	0.698	1.92326e-09	-0.587866
Timm13	0.343	0.645	2.30655e-09	-0.581722
Erh	0.385	0.687	2.31956e-09	-0.518319
Cct5	0.337	0.643	2.59693e-09	-0.544314
Atpif1	0.491	0.773	2.63387e-09	-0.539573
Ap2m1	0.325	0.631	2.78169e-09	-0.577764
Tmcc1	0.402	0.291	2.82415e-09	0.735458
Dusp3	0.178	0.47	3.19232e-09	-0.617236
Cd300a	0.491	0.483	3.44253e-09	0.543228
Bst2	0.29	0.595	3.76022e-09	-0.707808
Ranbp1	0.337	0.641	4.38222e-09	-0.575759
Samhd1	0.592	0.609	4.84925e-09	0.543083
Lpxn	0.142	0.42	5.4623e-09	-0.593722
Lst1	0.923	0.891	5.72003e-09	0.622
Zyx	0.574	0.446	6.40009e-09	0.666397
Rin3	0.254	0.146	6.5453e-09	0.589262
Atp5g2	0.485	0.76	6.63182e-09	-0.58425
Adrb2	0.42	0.237	7.20305e-09	0.813215
Glipr2	0.337	0.198	7.33682e-09	0.755403
Capg	0.562	0.778	7.86868e-09	-0.808591
Cttnbp2nl	0.089	0.321	8.73944e-09	-0.544207
Tmem160	0.284	0.579	9.45954e-09	-0.617771
Snrpb2	0.26	0.555	1.00512e-08	-0.506838
Gm6377	0.118	0.369	1.09147e-08	-0.655513
Lmna	0.142	0.404	1.12756e-08	-0.785844
Pou2f2	0.148	0.407	1.14013e-08	-0.546583
Trib1	0.527	0.432	1.17425e-08	0.647772
Card19	0.686	0.648	1.3e-08	0.554229
Fbxl5	0.379	0.326	1.34257e-08	0.601418
Tep1	0.071	0.303	1.48009e-08	-0.513721
Cycs	0.391	0.68	1.51625e-08	-0.564581
Itgb5	0.178	0.462	1.67954e-08	-0.583881
Cct4	0.337	0.633	1.85499e-08	-0.502583
Snrpf	0.402	0.692	2.23183e-08	-0.514639
Vps29	0.278	0.571	2.29067e-08	-0.510363
Hexb	0.379	0.661	2.31955e-08	-0.813855
Id1	0.337	0.125	2.52819e-08	0.765394
Ckb	0.172	0.434	2.59075e-08	-0.905269
Metap2	0.29	0.582	2.65221e-08	-0.516034
Arg1	0.142	0.374	2.78802e-08	-2.19542
Snrpa	0.065	0.299	3.31758e-08	-0.525969
Mdh1	0.166	0.444	3.33034e-08	-0.561624
Apobec1	0.207	0.486	3.97687e-08	-0.512625
Hipk1	0.314	0.182	4.0687e-08	0.601647
Serp1	0.822	0.764	5.13601e-08	0.541846
Capn2	0.142	0.407	5.83311e-08	-0.520209
Sdc3	0.107	0.36	6.7e-08	-0.606396
Sdhb	0.355	0.644	6.70519e-08	-0.514538
Rab5c	0.45	0.725	7.38623e-08	-0.510134
Blvrb	0.213	0.487	7.66475e-08	-0.677364
2610001J05Rik	0.272	0.551	9.64723e-08	-0.534848
Ezr	0.367	0.345	1e-07	0.501032
Man2b1	0.278	0.562	1.01858e-07	-0.581558
Cd83	0.059	0.277	1.07589e-07	-0.884501
Ssh2	0.485	0.401	1.12109e-07	0.549185
Rnase4	0.195	0.467	1.2281e-07	-0.543615
Gm10073	0.456	0.723	1.42802e-07	-0.628037
Nap1l1	0.29	0.575	1.63516e-07	-0.515817
Hnrnpa1	0.29	0.568	1.69298e-07	-0.607263
Ssr2	0.26	0.543	1.88898e-07	-0.537353
Ccl12	0.101	0.344	2.18684e-07	-1.40992
Slamf9	0.047	0.26	2.92405e-07	-0.758806
Itm2b	0.97	0.991	3.01071e-07	-0.581512
Cebpb	0.598	0.517	3.1691e-07	0.671934
Efhd2	0.621	0.846	3.32287e-07	-0.503189
Ier3	0.698	0.729	3.59646e-07	0.828971
Dpep2	0.148	0.401	4.13847e-07	-0.538027
Casp8	0.148	0.405	5.36901e-07	-0.503311
Cdk6	0.059	0.27	5.7049e-07	-0.519781
Camk1	0.183	0.449	7.13834e-07	-0.587469
Cd44	0.71	0.629	7.33461e-07	0.608933
H2-Aa	0.314	0.485	7.38067e-07	-2.30037
Rtcb	0.107	0.348	7.88318e-07	-0.525712
Ifitm6	0.438	0.286	9.15e-07	1.18353
Ier5	0.728	0.754	1.02e-06	0.545213
Ptafr	0.402	0.43	1.04864e-06	0.566903
Anxa4	0.142	0.393	1.072e-06	-0.546556
Pi16	0.29	0.137	1.30177e-06	0.668292
Adgre5	0.456	0.36	1.77e-06	0.690174
Emp1	0.172	0.421	1.82347e-06	-0.66859
Itgal	0.325	0.121	3.66336e-06	0.733476
Cd72	0.071	0.268	3.70115e-06	-0.996999
Gm5150	0.444	0.341	3.99566e-06	0.561667
Il17ra	0.373	0.278	5.38734e-06	0.586594
Cd86	0.189	0.433	7.31282e-06	-0.577992
Ccl3	0.385	0.414	8.29742e-06	1.23485
Ifitm2	0.917	0.953	8.87177e-06	0.512595
Ms4a4c	0.249	0.477	9.10284e-06	-0.927999
Akr1b3	0.201	0.452	9.18581e-06	-0.532486
Hsd17b12	0.172	0.415	9.98655e-06	-0.502376

## Sheet: MAC-IFNIC vs MACs
Gene	pct.1	pct.2	p_val_adj	Log2FoldChange
Isg15	0.961	0.252	4.48937e-188	3.31704
Ifit3	0.845	0.064	5.84005e-159	3.11996
Rsad2	0.8	0.076	7.41587e-144	3.593
Pyhin1	0.935	0.262	5.78094e-140	2.27467
Mnda	0.929	0.239	1.88674e-136	2.25216
Ifit1	0.806	0.068	3.34443e-134	3.0645
Ifi47	0.781	0.143	8.1317e-129	2.21492
Irf7	0.884	0.279	6.24979e-124	2.58602
Phf11b	0.877	0.226	9.54356e-124	2.09563
Usp18	0.774	0.094	6.78479e-123	2.20394
Ifi204	0.968	0.519	7.0352e-122	1.98308
Ifit2	0.652	0.03	9.29391e-110	2.03329
Ms4a4c	0.955	0.449	8.71472e-102	2.32329
Ifi203	0.903	0.304	1.06474e-99	1.94913
Mndal	0.865	0.305	8.53426e-97	1.90961
Phf11d	0.665	0.115	5.94286e-96	1.86615
Oasl2	0.865	0.227	4.18829e-92	1.83748
Oasl1	0.639	0.049	1.10966e-88	1.64181
Mx1	0.606	0.034	1.22444e-86	1.54533
Rtp4	0.929	0.367	5.36107e-86	1.77448
Zbp1	0.89	0.3	1.14254e-83	1.78311
Gm4955	0.658	0.068	1.37528e-83	1.6759
Cxcl10	0.497	0.041	5.28896e-83	3.7753
Ifi205	0.542	0.045	1.19026e-78	1.94842
Fcgr1	1	0.66	1.14967e-75	1.45629
Tor3a	0.787	0.217	1.22167e-73	1.57006
Slfn5	0.832	0.218	6.99268e-73	1.65212
Cmpk2	0.503	0.033	7.26018e-73	1.73439
Irgm1	0.697	0.135	4.90035e-68	1.49645
Ifit1bl1	0.374	0.006	7.91139e-68	1.59512
Pydc4	0.555	0.064	2.77406e-58	1.36234
Ube2l6	0.606	0.166	6.85954e-58	1.37461
Bst2	0.923	0.57	1.76869e-56	1.46731
Pnp	0.884	0.55	3.24392e-56	1.25633
Xaf1	0.703	0.208	5.00654e-56	1.33945
Stat1	0.69	0.221	3.02688e-54	1.46757
Ifit3b	0.381	0.017	1.18876e-51	1.22168
Trafd1	0.755	0.273	4.2291e-49	1.23994
Herc6	0.497	0.063	1.39468e-48	1.15671
Trim30a	0.852	0.404	1.53112e-48	1.34156
Nt5c3	0.49	0.117	1.4146e-46	1.20319
Ifih1	0.497	0.086	4.42672e-46	1.19873
Ifitm3	1	0.966	8.77598e-45	1.11455
Fgl2	0.645	0.235	4.17198e-44	1.46116
Isg20	0.497	0.075	1.42783e-43	1.37201
Sp100	0.813	0.357	1.9523e-42	1.20817
Pydc3	0.316	0.013	3.94803e-42	0.750823
Phf11a	0.445	0.051	5.50869e-42	1.07004
Ddx58	0.535	0.098	4.36379e-41	1.09173
Samd9l	0.542	0.128	5.06237e-41	1.23074
Ms4a6b	0.981	0.718	5.62849e-40	1.0862
Gbp2	0.413	0.057	6.8837e-40	1.39807
Daxx	0.619	0.181	9.32908e-40	1.12747
Epsti1	0.794	0.393	1.29109e-38	1.14841
Ifi35	0.742	0.316	1.45163e-37	1.14137
Slfn1	0.71	0.205	1.97848e-37	1.21443
Oas3	0.484	0.069	8.99918e-37	0.997193
Igtp	0.535	0.107	1.29371e-36	1.02656
Ly6a	0.568	0.281	4.04798e-36	1.81801
Ms4a6c	0.994	0.879	5.15158e-36	0.824519
Ly6e	0.994	0.889	7.23339e-35	1.07209
Gbp7	0.503	0.11	2.67016e-34	1.09349
Parp14	0.619	0.177	6.83218e-34	1.13474
Lgals9	0.742	0.391	8.82303e-33	1.08409
Samhd1	0.903	0.597	4.4743e-32	1.11948
H2-T22	0.613	0.252	1.16768e-31	1.05236
Psmb8	0.942	0.753	4.6992e-31	0.942817
AI607873	0.871	0.556	9.48271e-31	1.06524
Lgals3bp	0.677	0.343	1.49433e-30	1.12588
Parp12	0.581	0.166	2.21936e-29	0.978217
March5	0.645	0.329	6.42168e-29	1.00075
Sp110	0.626	0.257	6.75078e-29	1.00442
Slfn8	0.548	0.147	7.29485e-28	0.985859
Rnf213	0.6	0.173	1.98266e-27	0.863475
Tap1	0.581	0.214	8.02876e-27	0.986368
Ccl12	0.703	0.32	9.77194e-27	1.99034
Psmb9	0.703	0.341	1.02092e-26	0.987275
Dck	0.587	0.162	1.09524e-26	0.882635
Tor1aip1	0.8	0.468	1.39426e-26	0.952412
Cd40	0.335	0.09	4.24663e-26	0.841566
Trim30d	0.548	0.149	8.58835e-26	0.970049
Oas1a	0.645	0.254	1.02498e-25	0.949547
AW112010	0.445	0.253	3.34388e-24	1.47412
Slfn2	0.942	0.748	6.29496e-24	0.916238
Eif2ak2	0.503	0.162	1.99622e-23	0.950448
Znfx1	0.465	0.119	2.12045e-23	0.850805
Gbp3	0.394	0.099	1.99367e-22	0.848852
H3f3b	1	0.997	2.08511e-21	0.722583
Ms4a6d	0.968	0.796	2.49039e-21	0.876527
Apobec3	0.619	0.275	7.04607e-21	0.926341
Nmi	0.594	0.228	3.38403e-20	0.867173
Dtx3l	0.51	0.159	8.15883e-20	0.836679
Plac8	0.826	0.536	9.65615e-20	1.5148
Tspo	0.974	0.918	2.65533e-19	0.730448
Ddx60	0.303	0.044	4.56416e-19	0.655151
Mitd1	0.49	0.159	1.25503e-18	0.800404
1600014C10Rik	0.523	0.193	2.06711e-18	0.8574
Slfn4	0.348	0.065	4.22279e-18	0.866148
Tpst1	0.413	0.108	6.21922e-18	0.712962
Dhx58	0.432	0.123	3.04208e-17	0.742154
Cd47	0.877	0.73	4.75845e-17	0.729832
Chmp4b	0.916	0.737	5.77007e-17	0.711999
Ogfr	0.626	0.283	1.77561e-16	0.759501
Sap30	0.723	0.408	2.73877e-16	0.799859
Nampt	0.581	0.288	6.32222e-16	0.804357
Stat2	0.329	0.067	7.03752e-16	0.602649
Scimp	0.452	0.17	8.57909e-16	0.936575
Fcgr4	0.71	0.427	2.34974e-15	0.945206
Sp140	0.471	0.2	4.26427e-15	0.765709
Trim30c	0.271	0.044	5.15686e-15	0.632873
Ifi27l2a	0.877	0.83	8.27042e-15	1.0235
Helz2	0.271	0.045	5.9117e-14	0.569406
Il15	0.329	0.076	1.62132e-13	0.564651
Tapbp	0.761	0.505	2.03294e-13	0.732609
Oas2	0.297	0.069	8.20867e-13	0.614403
Parp9	0.413	0.126	8.21669e-13	0.610411
Gch1	0.548	0.247	1.10715e-12	0.789565
Npc2	0.987	0.944	1.25429e-12	0.547378
Hmox2	0.729	0.49	1.38213e-12	0.685341
Capza2	0.974	0.89	1.56866e-12	0.584309
Ccdc86	0.516	0.203	4.62383e-12	0.661512
H2-T23	0.568	0.255	5.30138e-12	0.672859
Ogfrl1	0.626	0.316	1.04358e-11	0.710064
Ly86	0.89	0.658	1.17624e-11	0.727147
Tmem171	0.277	0.07	2.52936e-11	0.56366
Fam46a	0.671	0.358	4.06316e-11	0.767763
Dek	0.671	0.471	5.72932e-11	0.712939
Psmb10	0.716	0.53	1.41655e-10	0.656401
Il18	0.452	0.167	1.80424e-10	0.585977
Grn	0.955	0.855	1.88432e-09	0.653195
Rasa4	0.394	0.146	1.1e-08	0.565693
Max	0.594	0.332	2.65297e-08	0.62345
Usp25	0.471	0.211	3.44219e-08	0.612575
Etnk1	0.342	0.125	8.66559e-08	0.543746
Sepw1	0.852	0.683	1.25601e-07	0.572812
Stard3	0.535	0.293	1.75756e-07	0.595769
Fndc3a	0.523	0.266	1.85332e-07	0.613685
Ly6c2	0.51	0.311	1.91673e-07	1.3096
Shisa5	0.916	0.839	1.94333e-07	0.514081
Il21r	0.413	0.175	2.11477e-07	0.578925
Cnp	0.426	0.181	2.36706e-07	0.509647
Pttg1	0.445	0.216	2.47672e-07	0.584086
Themis2	0.4	0.157	3.06328e-07	0.534938
Snx2	0.787	0.579	3.74857e-07	0.60596
Psme2	0.819	0.656	6.65577e-07	0.56082
B430306N03Rik	0.348	0.129	1.29014e-06	0.530942
Ccl2	0.865	0.628	1.297e-06	0.621855
Tor1aip2	0.413	0.184	2.15531e-06	0.526686
Sppl2a	0.535	0.277	4.49129e-06	0.509501
Rnpep	0.768	0.537	5.31575e-06	0.533472

## Sheet: MAC7 vs MACs
Gene	pct.1	pct.2	p_val_adj	Log2FoldChange
Gngt2	1	0.693	1.49984e-160	2.31619
Ear2	0.865	0.054	2.9684e-157	3.54023
Eno3	0.617	0.036	1.59598e-126	2.40578
Ace	0.702	0.033	6.69526e-114	2.26291
Adgre4	0.709	0.047	1.44799e-110	2.05736
Spn	0.695	0.056	3.93672e-110	2.14626
Itgal	0.78	0.107	3.98758e-109	2.39105
Pou2f2	0.837	0.382	5.55777e-103	2.09845
Pglyrp1	0.745	0.076	4.1355e-85	2.66437
Treml4	0.631	0.064	1.00835e-82	1.97791
Cd300e	0.468	0.011	4.18735e-75	2.11057
Prr13	0.915	0.649	6.0441e-65	1.55447
Myo1g	0.603	0.193	6.19136e-64	1.52274
Ctsc	0.567	0.942	3.47277e-63	-1.99891
Cst3	1	0.99	4.22668e-63	1.27936
Adrbk2	0.518	0.093	1.62966e-62	1.53358
Smc6	0.567	0.301	8.54222e-62	1.44559
Hfe	0.688	0.316	9.85107e-61	1.52902
Napsa	0.922	0.424	1.73036e-60	1.68422
S1pr5	0.333	0.003	3.49599e-59	1.23487
Ctsd	0.482	0.926	3.40574e-57	-2.5095
Rnase6	0.546	0.112	1.71084e-56	1.53752
Cebpb	0.83	0.509	1.63613e-55	1.61986
Rps27	1	1	4.62673e-55	0.814891
Wfdc17	0.404	0.93	1.46988e-54	-2.00472
Lgals1	0.567	0.927	2.38399e-51	-2.03737
Sat1	0.943	0.896	2.55253e-51	1.29543
Msrb1	0.943	0.751	3.0057e-51	1.42621
Stap1	0.638	0.225	2.6644e-50	1.56112
Cstb	0.433	0.915	9.07023e-50	-1.99666
Bcl2a1d	0.61	0.216	1.48735e-49	1.63256
Gpx1	1	0.976	1.68972e-49	1.09487
Lgmn	0.504	0.903	2.05145e-48	-2.05996
B2m	1	0.996	4.71964e-48	0.951448
Nadk	0.681	0.432	6.43285e-47	1.23408
Itga4	0.603	0.224	1.14769e-46	1.4064
Capg	0.177	0.79	1.79253e-46	-1.7934
Abi3	0.695	0.352	6.04384e-46	1.29406
Fau	1	0.999	2.01474e-45	0.822588
Cytip	0.794	0.388	3.35987e-45	1.46018
Limd2	0.674	0.443	8.18304e-45	1.29383
Cd300a	0.78	0.473	8.67311e-45	1.30329
Spp1	0.184	0.744	9.79223e-45	-4.21179
Lst1	0.972	0.889	9.97156e-45	1.21002
Mt1	0.234	0.809	2.66161e-44	-2.08473
Ptprc	0.901	0.686	5.54943e-44	1.2197
Dab2	0.085	0.667	1.27777e-43	-2.11616
Ms4a6d	0.27	0.821	1.7758e-42	-1.74119
Coro1a	0.993	0.905	3.90188e-42	1.05853
Stk10	0.518	0.147	4.93079e-42	1.26546
Cybb	0.922	0.657	6.30593e-42	1.31692
Fgr	0.695	0.34	1.99717e-41	1.32315
Samsn1	0.773	0.371	8.48273e-41	1.41638
Ifitm6	0.816	0.274	2.26907e-40	1.55073
Ctsl	0.27	0.796	2.54511e-40	-2.07783
Ms4a7	0.071	0.616	1.16539e-39	-2.8296
Fcgr3	0.496	0.919	3.03596e-39	-1.27688
Dusp16	0.369	0.072	4.3179e-39	1.23139
Cd14	0.248	0.81	4.55003e-39	-1.57366
F13a1	0.043	0.595	9.66636e-39	-2.00817
Lsp1	0.965	0.793	1.65454e-38	1.12554
Agpat4	0.617	0.275	1.57652e-37	1.21843
Klf2	0.936	0.659	1.62363e-37	1.519
Tgfbi	0.496	0.915	2.75067e-37	-1.57972
Dusp5	0.496	0.152	3.26802e-37	1.51251
Rap1a	0.865	0.796	1.19605e-36	0.9691
H2-K1	0.979	0.866	1.72031e-36	1.13196
H2-D1	1	0.988	7.08116e-36	0.894158
Nr4a1	0.858	0.498	1.00089e-35	1.3807
Fcgr1	0.149	0.69	1.17602e-35	-1.56862
C3ar1	0.085	0.637	1.31608e-35	-1.59153
Rasgrp2	0.504	0.132	1.97409e-35	1.29865
C1qb	0.177	0.649	2.08355e-35	-3.53554
Ccl9	0.404	0.858	4.02302e-35	-1.98386
Fn1	0.184	0.722	4.42672e-35	-2.25004
Dusp2	0.539	0.146	5.85071e-35	1.61261
Clec4a3	0.887	0.668	4.22145e-34	1.18151
Fth1	1	1	1.97277e-33	-1.19189
Cyfip2	0.305	0.046	2.34955e-33	1.02356
Maf	0.099	0.626	2.44477e-33	-1.6852
Ly6i	0.362	0.037	2.81421e-33	1.29863
Mafb	0.34	0.829	3.67556e-33	-1.5464
Ly6e	1	0.89	7.21567e-33	1.03236
Pf4	0.149	0.628	2.62308e-32	-3.55904
C5ar1	0.34	0.818	3.61555e-32	-1.57257
Ceacam1	0.411	0.093	4.57531e-32	1.23562
C1qa	0.113	0.591	1.16963e-31	-3.6668
Ccr1	0.099	0.616	1.83723e-31	-1.67787
Ccl2	0.156	0.653	2.62666e-31	-3.05463
Fcgr4	0.574	0.432	4.62011e-31	1.26691
S100a10	0.404	0.855	6.37647e-31	-1.43945
C1qc	0.113	0.603	7.97766e-31	-3.12404
Tspo	0.652	0.929	8.54254e-31	-1.15205
Stk24	0.539	0.297	8.9773e-31	1.05401
Smpdl3a	0.851	0.58	1.65526e-30	1.2345
Ifitm3	1	0.966	1.81032e-30	0.691907
Tnfrsf1b	0.624	0.307	1.91781e-30	1.13095
Cfp	0.135	0.643	2.18902e-30	-1.63942
Npc2	0.794	0.951	2.49071e-30	-0.977466
Sdcbp	0.61	0.932	8.46595e-30	-1.10319
Hes1	0.525	0.16	1.83722e-29	1.85847
Nupr1	0.553	0.37	2.03339e-29	1.23213
Ier3	0.241	0.744	4.63423e-29	-1.56993
Adgre5	0.667	0.354	7.29834e-29	1.25112
Clec4a2	0.206	0.702	1.00358e-28	-1.28563
Ldlrad3	0.298	0.054	1.66361e-28	0.961231
Msn	0.908	0.819	1.77958e-28	0.889016
Rab3il1	0.028	0.491	2.24089e-28	-1.20914
Snx5	0.234	0.708	3.55671e-28	-1.30991
Rpl13a	0.993	0.992	5.21948e-28	0.65393
Sepp1	0.468	0.784	1.21665e-27	-1.9536
Fcgr2b	0.277	0.761	2.58927e-27	-1.18506
Nxpe4	0.298	0.048	2.60301e-26	0.984807
Klf13	0.801	0.597	4.52741e-26	1.03781
Rab7b	0.05	0.497	4.55958e-26	-1.12912
Skint3	0.305	0.036	5.65696e-26	1.03521
Dhrs3	0.057	0.515	1.05583e-25	-1.19157
Bcl2	0.348	0.117	1.23936e-25	0.972178
Lmo4	0.489	0.251	1.84191e-25	1.06776
Spi1	0.915	0.863	1.86731e-25	0.860022
Slc3a2	0.213	0.675	2.07821e-25	-1.14062
Grn	0.574	0.868	2.36516e-25	-1.26664
Rbpms	0.298	0.057	2.54516e-25	0.930821
Unc119	0.433	0.192	3.00626e-25	1.00728
Flna	0.759	0.494	3.4042e-25	1.02399
Ecm1	0.085	0.539	4.07531e-25	-1.47933
Anp32a	0.688	0.595	4.08442e-25	0.843808
Rps14	1	0.997	7.66741e-25	0.600004
BC028528	0.511	0.371	8.87835e-25	0.873659
Msr1	0.113	0.579	1.91615e-24	-1.34363
Trem3	0.489	0.141	2.1301e-24	1.19609
Smpdl3b	0.291	0.047	3.43977e-24	0.923827
Atpif1	0.333	0.776	4.35958e-24	-1.07257
App	0.27	0.73	8.00328e-24	-1.1137
Serpinb10	0.34	0.044	1.62446e-23	1.03545
Sh2d1b1	0.348	0.107	2.04298e-23	0.899375
Vim	0.702	0.933	2.32605e-23	-1.32901
Il17ra	0.589	0.271	2.58343e-23	1.03668
Arhgef1	0.489	0.321	3.86631e-23	0.886077
Ccl7	0.071	0.487	5.59771e-23	-3.25058
Zfp706	0.759	0.624	6.32681e-23	0.824885
Nabp1	0.447	0.222	7.08823e-23	0.995205
Cd300ld	0.553	0.399	1.46842e-22	0.95625
Cd47	0.887	0.73	3.75754e-22	0.853934
Nfkb1	0.475	0.292	4.06257e-22	0.903215
Thbs1	0.121	0.565	5.63073e-22	-1.89895
Rras	0.369	0.132	1.18044e-21	0.906062
Cotl1	0.801	0.964	1.32776e-21	-0.893299
Rps11	1	0.991	1.36592e-21	0.651098
Tmcc1	0.56	0.287	1.69262e-21	1.11741
Rgs10	0.305	0.713	1.93643e-21	-1.15813
Clta	0.787	0.939	2.5192e-21	-0.837362
Cdk2ap2	0.872	0.668	2.59696e-21	0.971069
Ppp1cb	0.525	0.356	3.06666e-21	0.838783
H3f3a	1	0.99	3.9506e-21	0.582577
Rps19	1	0.994	4.62515e-21	0.54093
B4galnt1	0.468	0.322	6.12014e-21	0.829502
Ikbkb	0.61	0.394	6.38289e-21	0.850478
Fam49a	0.397	0.137	7.86705e-21	1.01307
Trem2	0.206	0.641	8.96207e-21	-1.36118
Lilr4b	0.184	0.624	1.46074e-20	-1.01322
Basp1	0.057	0.464	2.12763e-20	-1.12768
Ccr5	0.078	0.473	2.14914e-20	-0.864864
Rpl34	1	0.993	2.24529e-20	0.555154
Rps23	1	0.997	2.49721e-20	0.531608
Ap1s2	0.56	0.454	3.69211e-20	0.827551
Plac8	0.872	0.535	3.95396e-20	1.16855
Cxcl2	0.262	0.673	4.30235e-20	-2.36837
Lilrb4a	0.461	0.84	4.89171e-20	-1.00997
Apbb1ip	0.667	0.536	5.51624e-20	0.834294
Rps24	1	0.988	5.66831e-20	0.627217
Stab1	0.071	0.477	5.69388e-20	-1.10488
Akr1a1	0.56	0.88	8.64189e-20	-0.953398
Dbnl	0.454	0.347	1.16256e-19	0.718292
Rps16	1	0.997	1.21449e-19	0.536773
Ccnd3	0.617	0.397	1.52413e-19	0.932186
Bcl2a1a	0.369	0.123	1.54674e-19	1.22785
Rps27a	1	0.997	1.67872e-19	0.56527
Cbfa2t3	0.333	0.099	1.84083e-19	0.880464
Ptpre	0.532	0.473	1.948e-19	0.766489
Ankrd44	0.404	0.252	2.55876e-19	0.840083
Rps3a1	0.993	0.991	2.62248e-19	0.588879
Cxcl16	0.135	0.553	3.03678e-19	-1.44145
Stk38	0.426	0.241	3.37985e-19	0.860294
Rap1b	0.965	0.897	5.66181e-19	0.745394
Ccr2	0.362	0.757	5.99436e-19	-1.27931
Gsr	0.83	0.471	8.45039e-19	0.965811
Rel	0.482	0.271	8.54531e-19	0.903107
Tmem37	0.007	0.348	8.59125e-19	-0.969101
Cd82	0.411	0.153	1.05849e-18	0.86773
Ifngr1	0.844	0.739	1.12841e-18	0.876712
Pilrb2	0.433	0.232	1.17581e-18	0.892299
Aif1	0.34	0.749	1.3722e-18	-1.11062
Ninj1	0.248	0.668	1.83779e-18	-1.11246
Aprt	0.426	0.794	2.25665e-18	-1.04951
Cd63	0.149	0.506	3.90525e-18	-1.79507
Gng2	0.057	0.425	3.91781e-18	-0.784877
Adap2	0.028	0.372	4.98675e-18	-0.80886
Rpl35a	1	0.998	5.17219e-18	0.509468
Fis1	0.652	0.643	7.27112e-18	0.624822
Ifi30	0.418	0.808	1.02756e-17	-0.885441
Rpl18a	1	0.997	1.07503e-17	0.508299
Comt	0.099	0.487	1.10975e-17	-0.865402
Emp1	0.064	0.423	1.11178e-17	-1.23921
Chmp2b	0.277	0.224	1.33551e-17	0.625552
Rassf5	0.411	0.213	1.39574e-17	0.84134
Ltb	0.291	0.05	1.66434e-17	1.00269
H2-Q7	0.355	0.126	1.69766e-17	0.944826
Gm15987	0.277	0.065	2.72869e-17	0.956335
Mif	0.355	0.74	3.45604e-17	-1.13174
Spata13	0.262	0.052	3.89784e-17	0.813097
Rnase4	0.106	0.468	7.49008e-17	-0.965835
Ftl1	1	1	9.39945e-17	-0.783645
Sdc4	0.064	0.431	1.28962e-16	-1.25285
Mrc1	0.043	0.355	1.82468e-16	-1.11431
Tln1	0.78	0.738	1.88399e-16	0.676078
Rpl37a	1	0.997	3.06923e-16	0.502583
Tmem106a	0.135	0.51	3.48374e-16	-0.970576
Clec4d	0.128	0.503	3.97507e-16	-1.28865
Laptm4a	0.752	0.725	5.07462e-16	0.63864
Rrbp1	0.468	0.829	8.3573e-16	-0.723923
Prkcd	0.61	0.516	8.39395e-16	0.696518
Fcrls	0.028	0.338	8.51209e-16	-1.77384
Arg1	0.057	0.375	1.08157e-15	-2.90024
Myl12b	0.809	0.731	1.1522e-15	0.687489
Adam8	0.05	0.394	1.25969e-15	-1.10045
Cdc42ep3	0.383	0.156	1.26123e-15	0.793352
Mier1	0.376	0.331	1.41493e-15	0.669232
Anxa3	0.149	0.528	1.90562e-15	-0.862305
Prelid1	0.411	0.788	1.94484e-15	-0.746143
Dok3	0.468	0.399	2.18381e-15	0.689943
Degs1	0.447	0.402	2.78677e-15	0.618301
Gpcpd1	0.39	0.237	3.85335e-15	0.961426
Glrx	0.106	0.482	4.24546e-15	-0.992175
Ccm2	0.348	0.233	6.66893e-15	0.697963
Clec4a1	0.752	0.607	8.68947e-15	0.830858
Ptk2b	0.383	0.22	9.58956e-15	0.731573
Lamp1	0.837	0.944	9.88957e-15	-0.70501
Hexb	0.291	0.662	9.97872e-15	-1.1172
Cnn2	0.667	0.498	1.44137e-14	0.796241
Pbxip1	0.404	0.252	1.46688e-14	0.772049
Zbtb7a	0.447	0.417	1.54413e-14	0.633716
Rbpj	0.106	0.468	1.90132e-14	-0.86034
Calhm2	0.312	0.162	2.65662e-14	0.659206
Hpgd	0.39	0.157	3.59989e-14	1.24967
Fyb	0.915	0.793	4.25905e-14	0.727843
Ctsh	0.681	0.877	4.42958e-14	-0.851385
Pilrb1	0.433	0.173	5.07607e-14	0.873001
P2ry6	0.234	0.606	5.39847e-14	-0.769937
Fosb	0.17	0.541	5.73405e-14	-0.976689
Hmgb2	0.723	0.479	5.98784e-14	0.83816
Cd93	0.099	0.455	6.42049e-14	-0.830317
Ccdc50	0.333	0.257	7.04307e-14	0.668239
Pdcd4	0.298	0.122	7.41255e-14	0.835975
Samhd1	0.766	0.603	9.42364e-14	0.823104
Rps15	0.986	0.979	1.25304e-13	0.565346
Cyth3	0.255	0.086	1.40802e-13	0.734438
Snx2	0.234	0.598	1.42706e-13	-0.877097
Il10rb	0.305	0.665	1.49236e-13	-0.598598
Sdf2l1	0.27	0.631	1.50874e-13	-0.948037
Hck	0.56	0.493	1.73901e-13	0.675178
Pmaip1	0.348	0.171	1.84311e-13	0.978016
Nme1	0.383	0.746	1.86424e-13	-0.813834
Slc44a2	0.27	0.083	2.49148e-13	0.722196
Ikzf1	0.39	0.245	3.19846e-13	0.670719
Traf1	0.262	0.097	4.05502e-13	0.884817
Ntpcr	0.071	0.401	4.24986e-13	-0.802716
AI607873	0.227	0.579	4.61912e-13	-0.713666
Adap2os	0.099	0.427	4.64659e-13	-0.709475
Ccl6	0.794	0.891	7.99191e-13	-1.46395
Mdfic	0.064	0.382	8.03407e-13	-0.731512
Pdia6	0.447	0.753	9.22466e-13	-0.853677
Ptprj	0.326	0.211	1.33514e-12	0.632434
Lyl1	0.383	0.237	1.75526e-12	0.729852
Susd3	0.496	0.392	1.8017e-12	0.681946
Fkbp2	0.22	0.576	1.90595e-12	-0.681003
Ccdc88a	0.284	0.23	1.94334e-12	0.567739
Tmem256	0.404	0.74	1.95592e-12	-0.688846
Phyh	0.298	0.238	2.22741e-12	0.567541
Cttnbp2nl	0.028	0.321	2.3443e-12	-0.693982
Fabp4	0.702	0.455	2.50923e-12	0.833766
Lat2	0.184	0.542	2.71829e-12	-0.724292
Lcp2	0.433	0.293	3.38968e-12	0.693437
Sgpl1	0.043	0.335	3.6277e-12	-0.654069
Rps13	0.993	0.985	3.62852e-12	0.515134
Cysltr1	0.021	0.296	3.9052e-12	-0.653248
Rps15a	1	0.992	4.04434e-12	0.520874
Cndp2	0.277	0.628	4.16798e-12	-0.865593
Fos	0.887	0.967	4.48432e-12	-0.907448
Lgals3	0.915	0.942	4.96964e-12	-0.992159
Akap13	0.652	0.57	5.03737e-12	0.725301
Ctss	1	0.98	5.31866e-12	-0.582781
Srsf5	0.681	0.635	5.32254e-12	0.637112
Sema4d	0.397	0.22	6.13267e-12	0.721634
Ppp2r5c	0.284	0.176	6.55117e-12	0.613671
Zdhhc6	0.262	0.14	7.03336e-12	0.558505
Camk1	0.113	0.45	7.26947e-12	-0.759423
Pkm	0.823	0.927	7.85878e-12	-0.878789
Rps27rt	0.965	0.948	1.04923e-11	0.535112
Cebpa	0.106	0.418	1.09117e-11	-0.65101
Calr	0.624	0.85	1.09747e-11	-0.828293
Pilra	0.631	0.499	1.12681e-11	0.770267
Timp2	0.121	0.439	1.3416e-11	-1.08214
Adrb2	0.411	0.238	1.35761e-11	0.897337
Glul	0.213	0.537	1.42799e-11	-0.7734
Fam107b	0.433	0.215	1.47555e-11	0.760811
Ppdpf	0.433	0.347	1.49895e-11	0.596597
Hip1	0.39	0.258	1.51237e-11	0.687636
Rtn4	0.433	0.768	1.58756e-11	-0.656764
Abca1	0.035	0.294	1.75361e-11	-0.639656
Hexa	0.525	0.802	2.0809e-11	-0.817117
Arpc5l	0.355	0.313	2.76601e-11	0.517289
Cks2	0.362	0.152	2.93205e-11	0.976364
Acot9	0.255	0.169	3.10644e-11	0.532509
Nuak2	0.305	0.185	3.30895e-11	0.628791
Ppib	0.511	0.822	3.66084e-11	-0.636311
Ctsb	0.972	0.98	4.02269e-11	-0.980016
Slc25a4	0.113	0.441	4.04331e-11	-0.7374
Tbxas1	0.035	0.314	4.44052e-11	-0.655637
Rps21	1	0.963	4.90404e-11	0.535153
Trps1	0.567	0.393	5.25547e-11	0.735775
Gm9843	0.965	0.924	5.82758e-11	0.683527
Smagp	0.291	0.199	8.88369e-11	0.657668
Chil3	0.312	0.655	9.11228e-11	-1.48532
Uba52	0.482	0.483	1.02432e-10	0.535468
Amdhd2	0.028	0.294	1.31377e-10	-0.625722
Ly86	0.362	0.677	1.37348e-10	-0.922137
Kras	0.546	0.409	1.41134e-10	0.684075
Cd84	0.156	0.484	1.42091e-10	-0.721417
Ywhaz	0.702	0.609	1.5275e-10	0.678178
Sdc3	0.085	0.359	1.8533e-10	-0.624848
Pdia4	0.128	0.43	1.94063e-10	-0.757851
Hsp90b1	0.532	0.83	2.01498e-10	-0.646919
Hif1a	0.17	0.479	2.45902e-10	-0.783721
Rara	0.369	0.175	2.46209e-10	0.734444
Zyx	0.518	0.449	2.49571e-10	0.634533
Pip4k2a	0.383	0.24	2.53821e-10	0.661579
Myof	0.035	0.286	2.78206e-10	-0.572558
P4hb	0.277	0.576	2.98999e-10	-0.58208
Anxa1	0.305	0.624	3.29709e-10	-0.954591
Mgp	0.518	0.314	3.37379e-10	0.795643
Celf2	0.603	0.589	4.0337e-10	0.546203
Ccl12	0.064	0.344	4.73064e-10	-1.89489
Arhgap9	0.418	0.312	5.09248e-10	0.608354
Tppp3	0.447	0.241	5.14631e-10	1.05162
Pebp1	0.262	0.591	5.48049e-10	-0.504138
Nt5dc2	0.028	0.289	5.70403e-10	-0.734415
Slc15a3	0.191	0.493	5.77901e-10	-0.516456
Tagln2	0.518	0.815	5.85632e-10	-0.684743
Itga6	0.021	0.254	5.91274e-10	-0.610144
Ranbp1	0.319	0.639	6.38237e-10	-0.572672
Cltc	0.284	0.606	7.42877e-10	-0.687639
Tmem176b	0.163	0.456	7.79072e-10	-1.37583
Tmem51	0.475	0.31	8.34123e-10	0.642552
Itch	0.305	0.203	1.01728e-09	0.517971
Oaz2	0.348	0.244	1.01849e-09	0.57931
Ptpn6	0.681	0.638	1.04269e-09	0.589081
Lmna	0.099	0.403	1.12051e-09	-0.863836
Ccl4	0.149	0.467	1.25252e-09	-1.66809
Clec4n	0.199	0.507	1.3072e-09	-1.12299
Bri3bp	0.312	0.128	1.37105e-09	0.708708
G0s2	0.298	0.09	1.39983e-09	0.566577
0610012G03Rik	0.184	0.499	1.40484e-09	-0.612879
Eid1	0.092	0.386	1.42276e-09	-0.575689
Dok2	0.113	0.41	1.44998e-09	-0.64805
Card19	0.333	0.66	1.4979e-09	-0.723727
Bmp2k	0.057	0.332	1.68882e-09	-0.734882
Rhoa	0.972	0.934	1.70232e-09	0.549023
Lrrfip1	0.603	0.516	1.79951e-09	0.599901
Ssh2	0.475	0.402	2.10843e-09	0.586945
Mrpl54	0.27	0.566	2.39411e-09	-0.548429
Nisch	0.149	0.456	2.51458e-09	-0.628429
Rpl5	0.965	0.9	2.70609e-09	0.506781
Gng12	0.113	0.388	2.7371e-09	-0.609004
Tcf7l2	0.27	0.107	2.79435e-09	0.688955
Osm	0.113	0.416	3.16406e-09	-0.949637
Rab1a	0.362	0.665	3.31323e-09	-0.583269
Bst1	0.071	0.343	3.47873e-09	-0.67458
Cyp4f18	0.574	0.47	4.01311e-09	0.722078
Il6ra	0.468	0.373	4.05741e-09	0.584541
Tmem86a	0.057	0.321	4.09421e-09	-0.569018
Ifitm2	0.986	0.951	4.42232e-09	0.601271
Tmem261	0.156	0.461	4.58483e-09	-0.606491
Evl	0.44	0.339	4.98114e-09	0.588263
Cd244	0.404	0.169	5.35399e-09	0.775804
Ahnak	0.44	0.697	5.38588e-09	-0.677364
Itgb2	0.801	0.72	5.44213e-09	0.570335
Ap2a2	0.213	0.52	5.46733e-09	-0.618717
Gusb	0.326	0.65	6.05743e-09	-0.512272
Camkk2	0.348	0.209	6.41023e-09	0.67732
Anxa4	0.106	0.393	7.38088e-09	-0.622999
Rnh1	0.44	0.696	7.64881e-09	-0.662128
Cmtm3	0.121	0.41	8.29237e-09	-0.603834
Pnp	0.255	0.573	8.46754e-09	-0.536611
Rpl30	0.979	0.953	8.61443e-09	0.528631
Pdia3	0.532	0.798	8.9604e-09	-0.68181
Il4ra	0.113	0.406	9.02773e-09	-0.670776
Bst2	0.312	0.592	9.04043e-09	-0.81189
Ptafr	0.142	0.439	1.0985e-08	-0.802521
Fyn	0.27	0.101	1.1154e-08	0.607592
Tab2	0.326	0.26	1.30068e-08	0.526836
Fmnl1	0.369	0.265	1.45906e-08	0.577106
Clec5a	0.035	0.275	1.46022e-08	-0.653824
Lgals3bp	0.092	0.364	1.46366e-08	-0.656795
Nab1	0.369	0.213	1.66681e-08	0.630092
Ctsz	0.752	0.92	1.8163e-08	-0.615915
Arhgdib	0.965	0.901	1.93097e-08	0.542718
Sirt7	0.383	0.286	1.97937e-08	0.524011
Lgals9	0.121	0.414	2.117e-08	-0.628282
Tuba1c	0.213	0.527	2.12453e-08	-0.576904
Adgre1	0.298	0.595	2.19993e-08	-0.746496
AI662270	0.319	0.6	2.22111e-08	-0.543421
Tpp1	0.106	0.388	2.28599e-08	-0.584737
Cd9	0.688	0.431	2.92864e-08	0.796977
Lrpap1	0.17	0.455	3.42023e-08	-0.547392
Adam15	0.142	0.418	4.13592e-08	-0.542183
Lair1	0.532	0.454	5.24525e-08	0.594329
Gapdh	0.894	0.968	5.25945e-08	-0.657561
Itgb5	0.163	0.46	5.33557e-08	-0.663996
Marcksl1	0.241	0.495	5.55514e-08	-0.956844
Tmed9	0.397	0.693	6.10047e-08	-0.522572
Ppp2r5a	0.305	0.206	6.14355e-08	0.640005
Anxa5	0.645	0.853	6.41186e-08	-0.598323
AF251705	0.809	0.75	7.26283e-08	0.619985
Prkcb	0.319	0.241	7.63977e-08	0.509722
Gas7	0.043	0.278	8.26779e-08	-0.663814
Pkib	0.05	0.286	9.39472e-08	-0.528747
Rap2b	0.191	0.479	9.57663e-08	-0.650494
Dpysl2	0.092	0.356	9.7833e-08	-0.558934
Idh2	0.043	0.283	1.04987e-07	-0.538927
Rac2	0.809	0.783	1.29855e-07	0.532221
Cd86	0.149	0.432	1.3448e-07	-0.633199
Fgl2	0.035	0.257	1.64746e-07	-0.704595
Filip1l	0.426	0.349	1.7673e-07	0.600782
Pid1	0.539	0.797	1.78192e-07	-0.658791
Litaf	0.397	0.693	1.8735e-07	-0.539342
Rgs1	0.156	0.442	1.94483e-07	-1.22141
Il2rg	0.362	0.246	2.3174e-07	0.588211
Bin2	0.553	0.462	2.32232e-07	0.584279
Dock2	0.411	0.303	2.49299e-07	0.582362
Klf3	0.447	0.416	2.49757e-07	0.539058
Fabp5	0.241	0.467	2.54681e-07	-1.6023
Bnip3l	0.617	0.493	2.84329e-07	0.559941
Egr1	0.241	0.522	5.24739e-07	-0.912366
Cerk	0.043	0.266	7.23727e-07	-0.512908
Tmpo	0.39	0.247	7.39796e-07	0.617599
Tgfbr1	0.369	0.292	8.45563e-07	0.608169
Emb	0.348	0.585	9.43866e-07	-0.61684
Gm26740	0.433	0.329	9.58679e-07	0.565678
Nrp1	0.149	0.41	1.17939e-06	-0.691204
H2-DMb1	0.142	0.405	1.17982e-06	-0.980132
Capn2	0.135	0.406	1.35431e-06	-0.544538
Isg15	0.057	0.285	1.43953e-06	-1.09534
Apoe	0.986	0.977	1.56102e-06	-1.33964
Got1	0.05	0.279	1.70713e-06	-0.593022
Klf4	0.66	0.535	1.85571e-06	0.755432
Vsir	0.418	0.688	2.11161e-06	-0.539596
Pld3	0.064	0.296	2.2294e-06	-0.552409
Rasa3	0.298	0.186	2.44809e-06	0.511823
1600010M07Rik	0.262	0.133	2.461e-06	0.591016
Eif1a	0.156	0.425	2.83362e-06	-0.520561
Tmem38b	0.284	0.175	4.15127e-06	0.569344
Rgs2	0.851	0.741	4.19362e-06	0.627546
Itm2b	0.993	0.99	4.49812e-06	-0.58113
Ncl	0.426	0.704	4.64475e-06	-0.528854
Gnpda1	0.099	0.348	4.87343e-06	-0.566953
Rab20	0.121	0.379	5.80808e-06	-0.672825
Ap2m1	0.383	0.627	6.20792e-06	-0.512939
Hspa5	0.681	0.865	6.68302e-06	-0.726917
Snx3	0.546	0.795	6.76414e-06	-0.528984
Bcl2l1	0.071	0.304	6.95635e-06	-0.543863
Bhlhe40	0.291	0.144	7.78428e-06	0.594811
Cdkn1a	0.475	0.722	9.3388e-06	-0.622553
Tpi1	0.504	0.73	9.7923e-06	-0.67726

## Sheet: MAC8 vs MACs
Gene	pct.1	pct.2	p_val_adj	Log2FoldChange
Ltc4s	0.927	0.086	3.09815e-174	3.55543
Saa3	0.715	0.128	2.55433e-96	4.8186
Crip1	0.993	0.929	1.19893e-67	2.02023
Wfdc17	0.971	0.911	1.45332e-60	2.1504
Ednrb	0.591	0.071	1.55942e-60	1.88801
Ccl6	0.985	0.885	1.13385e-59	2.19274
Sdc3	0.701	0.338	2.43806e-56	1.55621
Gpx1	0.993	0.977	2.1626e-55	1.27088
Arg1	0.912	0.346	8.18686e-49	1.94816
Fn1	0.934	0.696	1.19078e-44	1.9489
Prtn3	0.474	0.071	1.19979e-38	1.50566
Itgam	0.876	0.57	1.38615e-38	1.32319
Add3	0.577	0.144	4.09639e-31	1.15126
Gda	0.92	0.556	4.3865e-31	1.24133
Idh1	0.693	0.284	2.05617e-30	1.12973
Rplp0	0.993	0.995	2.31137e-30	-0.75453
Tgfbi	0.65	0.91	1.52797e-29	-1.61518
Padi4	0.321	0.031	8.39849e-28	1.08682
Cebpb	0.788	0.511	1.12511e-27	1.3275
Atp1b3	0.766	0.512	1.37983e-27	1.062
Rhoc	0.489	0.206	2.90221e-26	1.20645
App	0.861	0.71	3.67914e-26	1.00693
Ccl24	0.445	0.082	9.51875e-26	1.99561
Tppp3	0.569	0.237	1.01456e-25	1.59541
Emp3	0.971	0.899	1.58331e-25	0.926601
Cbr2	0.496	0.138	2.08901e-25	1.67556
Gm42418	0.628	0.476	2.93956e-25	1.69185
Ms4a8a	0.562	0.162	5.57079e-24	1.07922
Smpdl3a	0.832	0.581	1.84159e-23	1.1196
Cd163	0.277	0.034	7.95502e-23	1.54652
Acly	0.474	0.201	2.59383e-22	0.979562
AI467606	0.431	0.121	4.92891e-22	0.991323
Ms4a7	0.255	0.609	1.50484e-21	-2.17405
Folr2	0.511	0.137	2.32444e-21	1.21804
Cd38	0.526	0.182	3.23591e-21	1.08587
Ifitm3	0.985	0.967	5.72323e-21	0.721001
Anxa3	0.788	0.506	6.78326e-21	0.991689
Adam15	0.715	0.398	1.16423e-19	0.876338
Rpl10	0.956	0.994	2.48513e-19	-0.639879
Agtrap	0.358	0.109	3.95128e-19	0.839075
Tbxas1	0.54	0.296	1.38926e-18	0.880581
Lst1	0.635	0.9	2.00929e-18	-1.02213
Ccl9	0.978	0.839	3.99582e-18	1.09909
Ahnak	0.891	0.681	5.16846e-18	0.942452
Klf2	0.898	0.66	1.52874e-17	1.08427
Ms4a6c	0.606	0.892	1.80694e-17	-0.943785
Ecm1	0.854	0.513	2.16214e-17	0.956858
Hspa8	0.985	0.989	6.60554e-17	-0.743569
Hopx	0.285	0.043	1.05091e-16	0.806505
Tmcc1	0.635	0.284	2.39933e-16	0.983322
Mt2	0.401	0.137	9.8302e-16	1.58744
Fth1	1	1	4.66091e-15	-0.949743
Ms4a6b	0.372	0.739	5.515e-15	-1.01894
Rps6	1	0.993	1.66773e-14	-0.520914
Pycard	0.81	0.706	2.97992e-14	0.755088
Cd52	0.92	0.984	3.31054e-14	-0.729317
Adam10	0.496	0.265	4.40667e-14	0.828358
Ncf1	0.635	0.455	6.74963e-14	0.793586
S100a8	0.679	0.506	8.87581e-14	-2.59042
Prdx5	0.942	0.908	1.2682e-13	0.688146
Ifitm2	0.971	0.951	1.75912e-13	0.683658
Plbd1	0.19	0.543	3.40281e-13	-1.10342
Cd68	0.62	0.878	3.48119e-13	-0.866991
Colgalt1	0.474	0.282	4.42102e-13	0.749717
S100a1	0.533	0.281	6.29723e-13	0.777154
Clec4a2	0.38	0.695	7.22118e-13	-1.0311
Irf2bp2	0.38	0.304	7.7628e-13	0.681928
Timp2	0.715	0.419	8.21747e-13	0.915699
Fos	0.876	0.967	8.82949e-13	-0.846392
Emilin2	0.745	0.516	1.17302e-12	0.88499
Txn1	0.876	0.835	2.16937e-12	0.721823
Sirpb1c	0.365	0.635	3.41364e-12	-1.10491
H3f3b	0.993	0.997	4.75295e-12	-0.602154
Ptgs1	0.343	0.105	6.7141e-12	0.752366
Tpd52	0.591	0.857	8.86192e-12	-0.767071
Fcrls	0.102	0.336	2.11369e-11	-1.60168
Pygl	0.423	0.18	2.64987e-11	0.819566
Cd44	0.832	0.626	3.33155e-11	0.865754
Serpinb6a	0.453	0.194	3.49133e-11	0.990254
S100a4	0.942	0.796	7.40435e-11	0.836989
Bst1	0.613	0.325	1.03319e-10	0.806381
Cxcl16	0.307	0.547	1.47353e-10	-1.16206
Coro1a	0.774	0.913	1.55977e-10	-0.826476
Cfp	0.832	0.619	2.66883e-10	0.767778
Aplp2	0.577	0.378	4.45452e-10	0.708298
Plxnb2	0.489	0.27	5.85624e-10	0.701735
Lrg1	0.496	0.186	5.92515e-10	0.855723
Aif1	0.504	0.743	7.74786e-10	-0.972953
Ssr3	0.62	0.486	7.76297e-10	0.648744
Rgs2	0.533	0.752	8.59483e-10	-0.985884
Prr13	0.745	0.655	9.1528e-10	0.752857
Gm8730	0.686	0.864	1.70741e-09	-0.736768
Ms4a6d	0.606	0.809	2.11947e-09	-0.908013
Sod2	0.555	0.46	2.40585e-09	0.683014
Ptprj	0.401	0.208	3.17304e-09	0.668464
Tagln2	0.891	0.802	4.68103e-09	0.729272
Ifitm6	0.591	0.282	5.09986e-09	0.537125
Slc28a2	0.277	0.086	5.40521e-09	0.670064
Pros1	0.343	0.123	7.4559e-09	0.627847
Gas7	0.526	0.261	1.05373e-08	0.755396
Ms4a4c	0.19	0.477	2.18972e-08	-1.21471
Man1a	0.467	0.268	2.32229e-08	0.67556
Gpx4	0.869	0.805	2.77856e-08	0.576572
Napsa	0.197	0.449	2.94977e-08	-1.03828
Rhoa	0.956	0.935	7.27085e-08	0.525928
Dhrs3	0.679	0.494	1.04353e-07	0.678682
Iqgap2	0.387	0.165	1.30456e-07	0.589624
Ier5	0.511	0.761	1.34825e-07	-0.781057
Nupr1	0.606	0.369	1.69902e-07	0.767973
Il1b	0.518	0.698	1.77768e-07	-1.48753
Adgre5	0.635	0.355	1.90467e-07	0.746597
Pf4	0.759	0.607	2.14788e-07	1.29337
S100a6	0.978	0.936	2.38611e-07	0.677081
H2-DMa	0.328	0.562	2.70893e-07	-1.00997
Samsn1	0.628	0.376	3.00262e-07	0.769562
Rasgrp2	0.387	0.136	3.33988e-07	0.659535
Camkk2	0.409	0.207	3.69339e-07	0.70333
Fam105a	0.416	0.654	5.41447e-07	-0.746888
Fbxl5	0.496	0.322	5.43564e-07	0.7507
Rab11fip5	0.387	0.171	6.8414e-07	0.628407
Ceacam1	0.321	0.097	7.08621e-07	0.616866
Wfdc21	0.321	0.101	7.15555e-07	1.33765
Btg2	0.737	0.833	9.79253e-07	-0.896868
S100a10	0.934	0.836	1.09907e-06	0.61939
Cd83	0.073	0.275	1.12189e-06	-0.91969
Cd74	0.445	0.651	1.61695e-06	-2.18643
Taldo1	0.679	0.843	1.86504e-06	-0.687485
Pltp	0.547	0.331	1.89927e-06	0.814116
Fcgrt	0.474	0.261	2.10169e-06	0.794648
Atf3	0.401	0.621	2.15702e-06	-1.06725
Cyp4f18	0.226	0.482	2.73435e-06	-0.804562
S100a13	0.781	0.645	2.96755e-06	0.561616
Stk17b	0.328	0.596	3.01532e-06	-0.76575
Nfic	0.518	0.318	3.03998e-06	0.623159
Rnf141	0.255	0.095	3.07551e-06	0.533774
H2-Ab1	0.438	0.563	3.32983e-06	-2.152
Ccl2	0.489	0.642	4.58619e-06	-1.73681
Itgb2	0.81	0.72	5.58749e-06	0.593746
Eif4a1	0.847	0.924	5.65355e-06	-0.573238
Hist1h2bc	0.445	0.192	8.42922e-06	0.622678
