# Supplementary material for: Single-cell expression profiling reveals dynamic flux of cardiac stromal, vascular and immune cells in health and injury
Source: eLife journal article supplement (doi:10.7554/elife.43882), 2019-03-26
Supplement: supp [file elife-43882-supp-v1.zip › elife_poa_e43882_Supplementary_File_4.xlsx]

## Sheet: F-SL vs Rest
Gene	pct.1	pct.2	p_val_adj	Log2FoldChange
Hsd11b1	0.845	0.341	0	2.05111
G0s2	0.903	0.541	0	1.56724
Lpl	0.946	0.716	0	1.54832
Smoc2	0.979	0.789	0	1.50906
Gsta3	0.768	0.306	0	1.47746
Dpep1	0.937	0.617	0	1.34997
Crispld2	0.96	0.734	0	1.30667
Sparcl1	0.973	0.757	0	1.17341
Nmb	0.391	0.113	0	1.16162
Ms4a4d	0.833	0.521	0	1.02233
Clec3b	0.97	0.602	0	0.974981
Sept4	0.487	0.19	0	0.961063
Gstm1	0.984	0.757	0	0.926874
Htra3	0.993	0.884	0	0.907108
Prss23	0.706	0.52	0	0.887523
Enpp2	0.558	0.266	0	0.885899
Aldh2	0.926	0.802	0	0.880379
Rarres2	0.97	0.871	0	0.86076
Ifngr1	0.829	0.682	0	0.859873
Atp1a2	0.636	0.376	0	0.852772
Dcn	1	0.994	0	0.851861
Txnip	0.746	0.572	0	0.84955
Vwa1	0.769	0.478	0	0.843048
Htra1	0.73	0.526	0	0.82589
Ppp1r14a	0.507	0.306	0	0.824899
Abca8a	0.842	0.625	0	0.807724
Adamts5	0.861	0.65	0	0.803883
Gpx3	0.992	0.907	0	0.798066
Aldh1a1	0.747	0.566	0	0.796893
Angptl2	0.747	0.606	0	0.781562
Spon1	0.526	0.284	0	0.776788
Lamb1	0.73	0.554	0	0.768862
Gsn	1	0.988	0	0.756363
Slc43a3	0.848	0.719	0	0.73225
Heyl	0.542	0.363	0	0.712961
Klf9	0.8	0.683	0	0.710765
Rem1	0.465	0.257	0	0.707255
Gpm6b	0.915	0.835	0	0.682457
Cd302	0.85	0.75	0	0.665846
Tpst1	0.709	0.599	0	0.652636
Drap1	0.764	0.698	0	0.61096
Tcf4	0.922	0.887	0	0.600697
Cyb5a	0.961	0.933	0	0.599872
Sepp1	0.974	0.92	0	0.596105
Serping1	0.995	0.95	0	0.557907
Rnase4	0.962	0.928	0	0.554578
Ak1	0.154	0.477	0	-0.555375
Olfml2b	0.114	0.401	0	-0.578764
Palld	0.017	0.272	0	-0.588159
Marcksl1	0.046	0.312	0	-0.673112
Pmepa1	0.366	0.668	0	-0.721141
Cyb5r3	0.378	0.736	0	-0.751592
Vim	0.987	0.998	0	-0.772089
Cpe	0.028	0.295	0	-0.805014
Tgfb3	0.216	0.547	0	-0.841485
Actn1	0.11	0.434	0	-0.844255
Sparc	0.996	0.989	0	-0.857696
Cd248	0.105	0.412	0	-0.892485
Cd200	0.029	0.335	0	-0.940553
Fbn1	0.628	0.831	0	-0.99595
Ctgf	0.118	0.415	0	-1.00711
Crlf1	0.036	0.296	0	-1.02253
Tmsb4x	0.988	0.998	0	-1.04595
Col8a1	0.72	0.766	0	-1.05104
Fxyd6	0.567	0.79	0	-1.05456
Sfrp1	0.468	0.724	0	-1.05525
Fam101b	0.068	0.333	0	-1.13579
Ltbp2	0.043	0.364	0	-1.14029
Dkk3	0.061	0.385	0	-1.17539
Col14a1	0.232	0.628	0	-1.20905
Mfap5	0.879	0.954	0	-1.21184
Fstl1	0.874	0.963	0	-1.26423
Col5a2	0.51	0.766	0	-1.30901
Tagln	0.031	0.314	0	-1.36775
Col1a2	0.981	0.981	0	-1.46276
Lox	0.13	0.43	0	-1.48185
Mfap4	0.404	0.688	0	-1.52211
1500015O10Rik	0.024	0.294	0	-1.53873
Comp	0.018	0.255	0	-1.54192
Acta2	0.036	0.331	0	-1.56936
Col1a1	0.94	0.967	0	-1.58884
Cilp	0.121	0.417	0	-1.59434
Col3a1	0.971	0.979	0	-1.6329
Ddah1	0.017	0.323	0	-1.63336
Csrp2	0.284	0.744	0	-1.85311
Timp1	0.173	0.636	0	-2.37655
Cthrc1	0.036	0.361	0	-2.76993
Fn1	0.166	0.59	0	-2.88574
Postn	0.179	0.658	0	-3.2559
Hist1h2bc	0.309	0.626	1.51915304783266e-319	-0.693495
Ugdh	0.27	0.555	1.06340713348287e-318	-0.661396
Sh3bgrl3	0.585	0.823	1.3672377430494e-318	-0.677252
Spry1	0.634	0.494	1.58751493498513e-317	0.687778
Gstt1	0.626	0.463	1.11281758636362e-314	0.667956
Pabpc1	0.666	0.879	1.28402043803043e-312	-0.635947
Prg4	0.04	0.271	1.45969850189474e-310	-1.74759
Adm	0.391	0.148	5.74002452970555e-310	1.07454
Dpysl3	0.447	0.74	5.94363506544919e-310	-0.603034
Vcan	0.374	0.658	4.29401e-306	-0.61665
Map1b	0.176	0.473	6.12856e-306	-0.545471
Uqcc2	0.524	0.793	2.80507e-300	-0.576614
Tmem100	0.064	0.302	3.7015e-300	-1.00659
Nbl1	0.43	0.685	1.81106e-299	-0.790226
Emp1	0.751	0.891	6.37626e-299	-0.749966
Gfra1	0.291	0.094	1.25444e-296	0.659041
Sfrp2	0.175	0.383	1.36293e-296	-2.04647
Entpd2	0.877	0.745	2.14094e-292	0.578856
H2B-EGFP	0.801	0.673	4.88992e-289	0.62814
Bmp4	0.42	0.231	2.51252e-285	0.706103
Lama2	0.692	0.612	4.64973e-284	0.542373
Cyp27a1	0.431	0.222	1.93305e-282	0.672503
Acaa2	0.495	0.404	2.4706e-281	0.571554
Eef1b2	0.801	0.929	2.96167e-278	-0.581454
Adamts2	0.56	0.804	1.04171e-277	-0.606874
Slco2b1	0.281	0.076	2.75882e-276	0.645108
Rhoj	0.854	0.794	3.29391e-276	0.561352
Tagln2	0.783	0.924	4.95783e-276	-0.662883
Cd83	0.257	0.07	1.08015e-275	0.62675
Snrk	0.428	0.332	1.0931e-273	0.542042
Ypel3	0.836	0.78	1.23322e-270	0.534071
Col5a1	0.456	0.67	4.81477e-269	-0.675784
Col16a1	0.133	0.388	1.03373e-267	-0.574811
Eln	0.679	0.628	1.16204e-267	-0.955318
Gxylt2	0.297	0.527	9.91879e-267	-0.675551
Sulf2	0.217	0.502	1.63214e-266	-0.552574
Ggt5	0.313	0.11	6.72767e-266	0.677955
Gas1	0.923	0.807	8.44447e-265	0.685722
Gfpt2	0.265	0.508	1.32025e-264	-0.693848
Ly6c1	0.082	0.312	1.67418e-264	-1.02207
Lsp1	0.577	0.806	6.21165e-261	-0.66224
Tmem204	0.44	0.283	1.44142e-260	0.589085
Ppp1r14b	0.231	0.502	2.22771e-259	-0.51557
Ubc	0.976	0.973	3.73048e-259	0.554008
Rgs17	0.317	0.125	1.23726e-257	0.649273
Lbh	0.216	0.475	1.55518e-256	-0.646832
Ifi205	0.514	0.296	7.1704e-256	0.821169
Lgmn	0.208	0.42	9.99246e-256	-0.635915
Ly6a	0.502	0.694	5.60956e-255	-1.18296
Cp	0.764	0.607	1.0186e-253	0.625662
Tnfrsf12a	0.208	0.473	4.13043e-251	-0.633653
Col5a3	0.43	0.281	2.67036e-250	0.598154
C1qtnf6	0.252	0.503	2.66288e-246	-0.616713
Dap	0.673	0.86	6.57515e-246	-0.54538
Prex2	0.356	0.184	1.44008e-241	0.591209
Slc29a1	0.706	0.641	1.1804e-232	0.50567
Cpq	0.803	0.723	1.17856e-230	0.50324
Akap12	0.622	0.521	4.13006e-230	0.542875
Rasl11b	0.139	0.372	1.1981e-229	-0.524939
Mdk	0.134	0.36	3.70077e-229	-0.735711
Cxcl14	0.368	0.183	8.77115e-229	1.72796
Anxa2	0.87	0.949	8.13394e-227	-0.568221
Mfap2	0.259	0.497	1.45931e-226	-0.60574
Actg1	0.967	0.991	8.98614e-226	-0.63583
Fmo2	0.444	0.213	4.86329e-223	0.684709
Nrxn2	0.358	0.182	1.08055e-222	0.571732
Tpm4	0.741	0.891	7.10031e-219	-0.544948
Ptn	0.208	0.384	4.7305e-217	-1.60894
Vamp5	0.311	0.54	1.05004e-209	-0.500686
Npm1	0.796	0.921	2.9647e-209	-0.502926
Pdlim3	0.085	0.291	4.38229e-207	-0.623489
Ndufa4l2	0.7	0.518	1.10613e-206	0.610969
D630003M21Rik	0.284	0.124	1.96089e-206	0.518874
Tpm2	0.226	0.434	8.44181e-206	-0.56443
C1ra	0.497	0.363	2.30713e-203	0.545046
Msc	0.36	0.23	5.655e-203	0.59349
Spon2	0.557	0.356	1.15163e-197	0.781776
Thbs1	0.208	0.416	5.61375e-196	-0.871916
Ppic	0.578	0.766	8.44066e-195	-0.5485
Mgst1	0.827	0.683	3.59308e-192	0.509039
Podn	0.402	0.219	3.50299e-186	0.566649
Tsc22d3	0.693	0.594	2.49042e-184	0.575924
Jund	0.96	0.949	1.35256e-181	0.531657
AW112010	0.351	0.171	9.0661e-181	0.565367
Aspn	0.612	0.779	1.80909e-178	-0.794621
Penk	0.27	0.096	1.09438e-170	0.654107
F3	0.374	0.211	1.05052e-168	0.547162
Pam	0.722	0.853	9.93754e-168	-0.506335
Tmem176b	0.175	0.394	1.8139e-166	-0.532461
Pla1a	0.61	0.427	9.42577e-166	0.535087
Inmt	0.256	0.089	3.98728e-159	0.945559
Crip1	0.973	0.99	1.27395e-156	-0.597756
C1s1	0.491	0.34	2.589e-156	0.5197
Pdgfrl	0.342	0.538	6.41381e-153	-0.539938
Glul	0.591	0.467	3.67917e-152	0.533864
Fgl2	0.126	0.299	8.23285e-149	-0.573456
Ces1d	0.352	0.169	1.81732e-148	0.634234
Hes1	0.652	0.589	3.27787e-147	0.515161
Selenbp1	0.681	0.527	4.51022e-142	0.506578
Jun	0.869	0.907	5.91035e-142	0.647124
Serpina3n	0.167	0.345	1.92312e-141	-0.555376
Phlda1	0.68	0.562	2.96085e-138	0.53309
Id3	0.713	0.858	1.30452e-135	-0.569483
Hspa1a	0.364	0.292	1.0697e-129	0.895517
Pi16	0.795	0.788	4.80512e-128	-0.621769
Meox1	0.459	0.624	2.57233e-127	-0.611777
Mt2	0.241	0.423	2.85804e-111	-0.561422
Junb	0.887	0.909	9.87159e-108	0.550274
Btg2	0.65	0.639	3.01248e-106	0.5977
Cxcl1	0.503	0.421	6.8875e-89	0.777393
Ifi27l2a	0.863	0.883	1.20521e-78	-0.537139
Wisp2	0.287	0.43	4.02265e-76	-0.738234

## Sheet: MYO vs Rest
Gene	pct.1	pct.2	p_val_adj	Log2FoldChange
Cthrc1	0.943	0.125	0	3.72942
Fn1	0.993	0.363	0	3.61704
Sfrp2	0.817	0.218	0	3.20712
Ptn	0.879	0.215	0	3.13363
Ddah1	0.884	0.098	0	2.71464
Postn	0.995	0.428	0	2.6827
Col1a1	1	0.95	0	2.53723
Lox	0.956	0.215	0	2.5262
Eln	0.859	0.592	0	2.51997
Col1a2	1	0.977	0	2.42807
Col3a1	1	0.971	0	2.24021
Fam101b	0.805	0.141	0	2.21373
Col5a2	0.995	0.632	0	2.11588
1500015O10Rik	0.777	0.098	0	2.00919
Ltbp2	0.863	0.149	0	1.88999
Tagln	0.671	0.142	0	1.8299
Mfap4	0.986	0.53	0	1.78599
Wisp2	0.76	0.31	0	1.69825
C1qtnf3	0.309	0.02	0	1.65861
Csrp2	0.983	0.542	0	1.65278
Sfrp1	0.932	0.595	0	1.64831
Ctgf	0.809	0.23	0	1.61351
Col14a1	0.951	0.428	0	1.60817
Comp	0.671	0.085	0	1.58813
H19	0.291	0.016	0	1.56724
Cd200	0.734	0.147	0	1.4879
Wisp1	0.685	0.066	0	1.47092
Gxylt2	0.901	0.369	0	1.46256
Col5a1	0.96	0.536	0	1.45798
Mdk	0.8	0.188	0	1.44222
Gucy1a3	0.626	0.107	0	1.43457
Tgfb3	0.91	0.358	0	1.42375
Thbs4	0.298	0.06	2.72144e-258	1.41277
Acta2	0.606	0.174	0	1.37052
Aspn	0.978	0.68	0	1.34418
C1qtnf6	0.906	0.331	0	1.34286
Col8a1	0.981	0.703	0	1.3303
Thbs1	0.646	0.298	0	1.32653
Col16a1	0.832	0.206	0	1.30719
Actn1	0.838	0.239	0	1.30583
Sparc	1	0.989	0	1.30529
Fmod	0.561	0.053	0	1.28087
Lbh	0.852	0.306	0	1.28026
Cilp	0.68	0.262	0	1.21997
Fxyd6	0.967	0.679	0	1.21951
Ppic	0.974	0.659	0	1.21662
Col4a2	0.906	0.523	0	1.20061
Thbs2	0.798	0.368	0	1.19787
Runx1	0.628	0.081	0	1.17395
Marcksl1	0.736	0.13	0	1.14154
Gm26771	0.461	0.028	0	1.13543
Pmepa1	0.928	0.512	0	1.12382
Serf1	0.868	0.328	0	1.12281
Pdgfrl	0.856	0.403	0	1.11035
Fstl1	1	0.926	0	1.08725
Col12a1	0.542	0.07	0	1.08677
Itgbl1	0.872	0.413	0	1.08113
Col8a2	0.583	0.036	0	1.07489
Palld	0.651	0.105	0	1.06353
Fbn1	0.989	0.73	0	1.05776
Col11a1	0.335	0.012	0	1.02041
Cst3	1	0.996	0	1.00211
Fbln5	0.909	0.657	0	0.99951
Id3	0.98	0.784	0	0.997835
Myl9	0.565	0.151	0	0.995922
Crlf1	0.53	0.159	0	0.987794
Emp1	0.987	0.824	0	0.987386
Rps27rt	0.974	0.664	0	0.981412
Fat1	0.705	0.2	0	0.978461
Mfap2	0.785	0.356	0	0.97223
Gadd45b	0.78	0.319	0	0.96619
Fam198b	0.834	0.401	0	0.957452
Gm10073	0.975	0.704	0	0.947518
Rps12-ps3	0.969	0.689	0	0.943398
Rpl39	1	0.993	0	0.942373
Tspan6	0.639	0.22	0	0.94205
Snhg18	0.964	0.654	0	0.939807
Fndc1	0.815	0.409	0	0.933807
Nrep	0.659	0.186	0	0.92761
Synpo	0.707	0.186	0	0.920693
Vamp5	0.811	0.405	0	0.905146
Picalm	0.769	0.325	0	0.902856
Bgn	1	0.986	0	0.899279
Pam	0.972	0.784	0	0.889852
Loxl3	0.699	0.256	0	0.887004
Scx	0.311	0.03	0	0.88579
Matn4	0.351	0.032	0	0.884903
Tns3	0.669	0.175	0	0.88311
Lsp1	0.927	0.705	0	0.878193
Itgb5	0.927	0.624	0	0.875373
Wdr89	0.953	0.603	0	0.875074
Plod2	0.745	0.277	0	0.869406
Gm10263	0.817	0.302	0	0.867612
Enpp1	0.601	0.163	0	0.856865
P4ha3	0.528	0.049	0	0.854797
1810058I24Rik	0.922	0.583	0	0.854534
Frzb	0.801	0.425	0	0.852651
Tmsb4x	0.999	0.994	0	0.851754
Foxp1	0.794	0.321	0	0.846884
Rasl11b	0.691	0.225	0	0.84574
Marcks	0.965	0.699	0	0.840138
Col4a1	0.895	0.644	0	0.838959
4931406P16Rik	0.648	0.162	0	0.835987
Aebp1	0.94	0.665	0	0.832632
Itm2a	0.755	0.534	7.61622e-275	0.819749
Kif26b	0.445	0.018	0	0.819497
Ogn	0.972	0.834	0	0.819356
Kcnj15	0.4	0.024	0	0.817084
Eef1b2	0.99	0.874	0	0.806467
Rgs4	0.383	0.035	0	0.769945
Nsa2	0.901	0.536	0	0.763707
Loxl1	0.994	0.909	0	0.762793
Adamts2	0.951	0.692	0	0.753795
Rpl10-ps3	0.968	0.736	0	0.753266
Cdh2	0.475	0.045	0	0.752062
Myh9	0.657	0.233	0	0.74546
Serf2	0.999	0.987	0	0.734351
Adarb1	0.566	0.141	0	0.733181
Slc39a1	0.648	0.316	9.8607e-288	0.732855
Tpt1	1	0.998	0	0.731805
2310022B05Rik	0.684	0.247	0	0.725217
Plac8	0.26	0.043	6.72091e-258	0.719244
Phldb2	0.556	0.137	0	0.717733
Mmp14	0.85	0.539	0	0.717566
Tcea3	0.539	0.109	0	0.717505
Rab31	0.589	0.156	0	0.715396
Tpm2	0.716	0.303	0	0.715359
Tm4sf1	0.923	0.749	1.57945e-236	0.714622
Rpl41	1	0.999	0	0.70637
Clec11a	0.488	0.121	0	0.704796
Rbp1	0.991	0.907	0	0.69375
P4hb	0.958	0.71	0	0.688778
Rps12	0.999	0.986	0	0.681125
Igfbp7	1	0.993	0	0.679899
Unc5b	0.62	0.186	0	0.673275
Fbn2	0.375	0.039	0	0.67073
Ext1	0.657	0.239	0	0.668297
Btg1	0.849	0.535	1.80855e-282	0.667982
Cpe	0.566	0.148	0	0.667809
Rpl38	0.999	0.973	0	0.66637
Pxdn	0.66	0.244	0	0.664718
Hcfc1r1	0.907	0.625	0	0.663199
Ttll5	0.507	0.12	0	0.663175
Mrc2	0.694	0.259	0	0.662208
Creb3l2	0.82	0.441	0	0.661145
Gucy1b3	0.53	0.137	0	0.659925
Mgp	1	0.979	1.33406e-155	0.659789
Ctsk	0.73	0.363	0	0.659161
Rpl27-ps3	0.788	0.38	0	0.652782
Rplp1	1	0.998	0	0.649876
Ltbp3	0.753	0.328	0	0.648931
Tnc	0.368	0.076	0	0.647262
Sox4	0.711	0.326	0	0.646761
Lhfpl2	0.529	0.16	0	0.644401
Nkd2	0.511	0.149	0	0.643993
Luzp1	0.762	0.372	0	0.639059
Timp1	0.904	0.426	0	0.638528
Nedd4	0.983	0.812	0	0.633627
Nedd9	0.598	0.2	0	0.633413
Rps29	1	0.997	0	0.630672
Fhl2	0.589	0.24	4.01189e-288	0.627552
Pdlim3	0.539	0.169	0	0.626526
Gm8730	0.975	0.788	0	0.617891
Gm9843	0.946	0.688	0	0.617613
Gm15867	0.45	0.077	0	0.616393
Hif1a	0.594	0.217	0	0.614993
Rps21	0.999	0.961	0	0.613096
Pabpc1	0.976	0.789	0	0.609211
Cnn2	0.728	0.411	6.6285e-251	0.606438
Sertad4	0.566	0.166	0	0.603572
Eva1b	0.939	0.701	1.27202e-298	0.602206
Rps20	1	0.99	0	0.601223
Ap2a2	0.829	0.441	0	0.600148
Vcl	0.566	0.201	0	0.598128
Neo1	0.483	0.088	0	0.595262
Rps27	0.999	0.999	0	0.595092
Timp3	0.893	0.711	1.13053e-151	0.594677
Srpx2	0.874	0.585	4.28602e-256	0.592847
Lmo4	0.876	0.601	1.4449e-240	0.584615
Gnb2l1	0.997	0.959	0	0.583265
Tmem176b	0.7	0.255	0	0.581286
Dst	0.782	0.394	0	0.577132
Rps8	1	0.999	0	0.575833
Adamtsl2	0.488	0.269	2.47636e-139	0.573337
Gm42418	0.888	0.665	6.65261e-184	0.569675
Rpl37a	1	0.998	0	0.567893
Nox4	0.423	0.078	0	0.5635
Rps26-ps1	0.766	0.377	0	0.560286
Rps28	1	0.994	0	0.555656
Gpc6	0.852	0.525	1.27415e-275	0.555298
Npm1	0.979	0.868	9.94725e-275	0.553836
Dact3	0.493	0.109	0	0.553487
Gm9493	0.884	0.577	4.04511e-283	0.551766
Sdc1	0.583	0.192	0	0.548961
Rpl12	0.998	0.968	0	0.548357
Tnfrsf12a	0.661	0.345	1.17973e-221	0.545242
Dok1	0.604	0.235	0	0.541066
Ptprb	0.363	0.06	0	0.540631
Snhg6	0.594	0.221	0	0.533999
Gas6	0.893	0.639	6.62296e-204	0.53256
Col27a1	0.515	0.177	2.8523e-304	0.529849
Pdgfrb	0.739	0.402	9.01714e-269	0.529289
Ctsd	0.959	0.818	4.37531e-261	0.52131
Ckap4	0.845	0.513	1.59181e-270	0.51908
Rps10	0.999	0.978	0	0.518113
Figf	0.281	0.122	5.48656e-100	0.511587
Cyr61	0.86	0.541	8.21129e-259	0.511125
Bdnf	0.274	0.048	8.51717e-256	0.510413
Nuak1	0.343	0.046	0	0.509781
Lmcd1	0.365	0.075	0	0.508397
Dap	0.962	0.777	7.56781e-235	0.508324
Golga7	0.83	0.524	7.81256e-242	0.506561
Col6a3	0.784	0.592	3.24394e-150	0.504218
Cdh11	0.396	0.06	0	0.503783
Ncam1	0.3	0.052	1.89118e-287	0.502072
Gm11808	0.853	0.513	1.26832e-285	0.502011
C1ra	0.343	0.411	3.46325e-179	-0.502178
Cdkn1c	0.206	0.313	2.49063e-106	-0.502932
Hic1	0.304	0.41	3.2632e-178	-0.504641
Prex2	0.108	0.256	7.84825e-153	-0.50492
Fhl1	0.667	0.691	3.61596e-198	-0.505341
Col4a4	0.122	0.305	1.68218e-127	-0.505772
Degs1	0.568	0.62	7.90257e-274	-0.50731
Pid1	0.38	0.471	8.06902e-145	-0.50861
Fermt2	0.571	0.609	5.48283e-270	-0.509622
Nsg1	0.101	0.284	1.22929e-183	-0.510539
Abca8b	0.098	0.27	9.35273e-163	-0.512783
Sfxn1	0.328	0.436	3.75465e-220	-0.512845
Psmb6	0.758	0.786	7.40985e-282	-0.515851
Srsf2	0.743	0.767	5.05314e-240	-0.516501
Dnaja1	0.834	0.823	1.80112e-225	-0.517039
Lbp	0.163	0.307	8.075e-127	-0.517353
Rpn2	0.765	0.788	2.00611e-234	-0.518596
Slco3a1	0.192	0.34	6.55569e-191	-0.519966
Ndn	0.475	0.55	2.59376e-228	-0.521271
Eef1d	0.877	0.874	2.49766e-297	-0.523866
Jade1	0.287	0.409	3.61888e-186	-0.524349
Rnh1	0.622	0.652	2.5417e-301	-0.527148
Tnfsf12	0.411	0.512	8.23407e-239	-0.527541
Olfml3	0.795	0.827	4.20841e-141	-0.527883
Rogdi	0.079	0.26	8.71331e-198	-0.527934
Ubb	0.994	0.999	0	-0.528241
Arpc1b	0.969	0.964	4.61664e-231	-0.528815
Ywhaq	0.825	0.835	0	-0.529612
Cygb	0.946	0.929	1.16682e-175	-0.529824
Etfa	0.478	0.567	3.11247e-268	-0.530617
Man1a	0.278	0.391	4.96251e-216	-0.531501
Xbp1	0.764	0.768	3.57994e-287	-0.531611
Akap12	0.487	0.561	2.14108e-183	-0.535282
Ccdc80	0.994	0.971	6.69865e-153	-0.535411
Trip10	0.224	0.376	8.4819e-223	-0.536678
Psmc5	0.356	0.483	8.94532e-277	-0.537677
Ran	0.773	0.744	4.48872e-287	-0.539074
Angptl2	0.593	0.654	8.14742e-159	-0.539881
Gstp1	0.152	0.329	3.24795e-248	-0.540635
Spon1	0.243	0.371	6.5111e-124	-0.542811
Medag	0.718	0.728	6.80859e-249	-0.543866
Carhsp1	0.517	0.573	5.7087e-257	-0.549597
Cystm1	0.094	0.279	2.05078e-185	-0.55224
Ehd2	0.379	0.489	1.39955e-264	-0.552682
Lpar1	0.584	0.65	1.96951e-248	-0.554596
Xdh	0.062	0.256	1.98246e-194	-0.55484
Plin3	0.414	0.528	1.01173e-264	-0.555957
Fxyd5	0.539	0.59	1.33707e-179	-0.5563
Mt2	0.398	0.37	1.47801e-99	-0.558163
Nfe2l2	0.487	0.579	2.42077e-258	-0.558419
Add3	0.361	0.492	7.67705e-212	-0.559292
Cd55	0.4	0.471	1.46497e-150	-0.564034
Kcnk2	0.111	0.275	6.85098e-117	-0.566086
Por	0.245	0.382	2.29495e-232	-0.568564
Eif4a1	0.896	0.896	9.89325e-281	-0.569896
Ndrg2	0.542	0.602	2.58208e-228	-0.572484
Srsf3	0.718	0.779	9.17082e-258	-0.57411
Mt1	0.713	0.665	2.51599e-101	-0.575098
Ablim1	0.176	0.345	1.30663e-179	-0.577481
Capns1	0.909	0.913	0	-0.577658
Dhrs7	0.408	0.537	1.52065e-253	-0.581481
Tgm2	0.127	0.327	2.29285e-201	-0.58232
Gpm6b	0.85	0.857	3.38487e-215	-0.588652
Sat1	0.768	0.793	1.0054e-187	-0.588881
Slc29a1	0.611	0.669	1.5667e-225	-0.590228
Ndufb8	0.637	0.708	0	-0.596046
Sepw1	0.944	0.948	3.31356e-307	-0.602689
Txnip	0.589	0.624	3.51719e-199	-0.602982
Trf	0.247	0.305	1.87936e-135	-0.603129
Pon2	0.346	0.504	2.13148e-289	-0.609529
Zbtb20	0.962	0.965	8.85774e-257	-0.609695
Ace	0.56	0.645	5.61694e-224	-0.612199
Rem1	0.164	0.345	3.31191e-202	-0.61781
Herpud1	0.495	0.595	7.82909e-256	-0.618726
Ecm1	0.81	0.79	7.69095e-249	-0.619379
Anxa1	0.835	0.857	3.8721e-247	-0.621538
Pcolce	0.96	0.965	2.05821e-229	-0.626433
Scn7a	0.345	0.5	1.40071e-203	-0.626647
Podn	0.121	0.3	2.38613e-182	-0.627546
Rsrp1	0.937	0.945	0	-0.627799
Prelp	0.784	0.834	2.85994e-179	-0.630001
AW112010	0.056	0.255	3.97173e-194	-0.64222
Capg	0.566	0.636	9.35512e-227	-0.64412
Acaa2	0.313	0.454	2.12494e-257	-0.645906
Aldh1a2	0.214	0.309	7.52286e-135	-0.648924
F3	0.101	0.288	9.7257e-173	-0.65164
Ifitm2	0.977	0.982	0	-0.652075
Ngf	0.207	0.378	1.4429e-176	-0.655028
Rap1a	0.659	0.737	0	-0.655131
Lims2	0.09	0.295	1.49627e-243	-0.655923
Atp5b	0.874	0.894	0	-0.658009
Cd302	0.726	0.788	4.38839e-281	-0.660212
Tspo	0.911	0.926	0	-0.670038
Cyp27a1	0.099	0.317	2.99099e-226	-0.671705
Ppp1r2	0.573	0.681	4.15651e-304	-0.672272
Pdgfra	0.33	0.488	4.03559e-260	-0.672515
Bmp4	0.129	0.314	3.76715e-232	-0.678374
Cdc42ep2	0.265	0.442	2.98291e-273	-0.679632
Atp6ap1	0.457	0.599	0	-0.681191
Mat2a	0.661	0.707	1.18511635863955e-313	-0.684813
Rhob	0.52	0.605	1.35507e-281	-0.687121
Cd63	0.96	0.985	0	-0.689166
Ifi27	0.782	0.818	0	-0.689729
Cyba	0.72	0.763	0	-0.69342
Ppp1r14a	0.236	0.386	3.2117e-220	-0.694757
Fxyd1	0.844	0.858	0	-0.696522
Cnbp	0.862	0.904	0	-0.707658
Emp3	0.886	0.924	0	-0.708463
Pkm	0.801	0.835	0	-0.7093
Sdc2	0.855	0.888	0	-0.712291
Arl6ip5	0.599	0.711	0	-0.713774
Cd151	0.465	0.62	0	-0.722835
Ugp2	0.648	0.724	3.48223e-269	-0.727817
Cfh	0.884	0.9	1.75516e-187	-0.728299
Zfp385a	0.151	0.351	1.55075e-265	-0.732888
Hs3st1	0.047	0.277	5.16992e-245	-0.740699
Tpst1	0.528	0.65	0	-0.742138
Ftl1	0.999	1	0	-0.770776
Drap1	0.637	0.733	0	-0.784832
Gstt1	0.365	0.537	0	-0.789803
Atp1a2	0.292	0.479	3.33302e-257	-0.791961
Serpinb6a	0.824	0.86	0	-0.794181
H2-D1	0.853	0.947	0	-0.794734
Hn1	0.595	0.675	0	-0.798608
S100a6	0.994	0.996	0	-0.800042
Cd47	0.76	0.843	0	-0.804417
Dusp1	0.67	0.715	1.21792e-134	-0.806491
Anxa5	0.951	0.971	0	-0.810093
Aldoa	0.861	0.91	0	-0.812173
Jun	0.877	0.902	1.46679e-116	-0.813677
Ifitm3	0.99	0.995	0	-0.814373
Ctsb	0.908	0.918	1.29e-282	-0.816931
Htra1	0.435	0.612	1.96475e-252	-0.823625
Sepp1	0.888	0.944	5.59783743592876e-313	-0.823793
Gas1	0.802	0.845	2.28267e-221	-0.826408
Cpq	0.66	0.763	0	-0.830501
S100a10	0.897	0.955	0	-0.836024
Gfpt2	0.376	0.46	0	-0.846733
Socs3	0.424	0.515	1.70495e-176	-0.851785
Plpp3	0.633	0.789	8.65782e-261	-0.852797
Ubc	0.956	0.978	0	-0.862205
Klf4	0.688	0.735	1.45405e-167	-0.865612
Tubb4b	0.382	0.584	0	-0.875391
Fmo2	0.091	0.315	2.08129e-220	-0.876112
Tgfbi	0.224	0.393	3.86344e-218	-0.882187
Axl	0.776	0.823	0	-0.882714
6030408B16Rik	0.079	0.364	8.54547e-285	-0.897419
Klf9	0.612	0.737	0	-0.905583
Pmp22	0.89	0.938	0	-0.906542
Spon2	0.228	0.449	1.17416e-174	-0.919093
Selm	0.867	0.916	0	-0.920826
Qpct	0.256	0.531	0	-0.923541
Rnase4	0.914	0.942	0	-0.9307
Ces1d	0.008	0.264	0	-0.935673
Crip2	0.867	0.932	0	-0.942416
Ly6c1	0.107	0.284	6.56747e-152	-0.96026
Aes	0.641	0.803	0	-0.972723
Tubb6	0.378	0.574	0	-0.973847
Cp	0.484	0.686	0	-0.978361
Apod	0.126	0.275	3.77071e-144	-0.987704
Tppp3	0.384	0.62	6.10073e-212	-1.00532
Cd9	0.81	0.865	0	-1.00554
Atf5	0.41	0.597	8.45887e-303	-1.00616
Ccnd1	0.113	0.409	5.20582986643036e-313	-1.00745
Pgf	0.077	0.358	6.84277e-289	-1.01241
Phlda1	0.41	0.634	9.8461e-278	-1.01434
Tmem100	0.062	0.279	4.06469e-213	-1.01741
Ifngr1	0.579	0.753	0	-1.01822
Cxcl1	0.358	0.462	1.0116e-95	-1.02007
C3	0.332	0.51	1.15465e-171	-1.02247
Pcsk6	0.456	0.625	0	-1.02982
Uap1	0.494	0.631	0	-1.03875
Entpd2	0.642	0.811	0	-1.03934
Junb	0.883	0.908	1.00792e-219	-1.05517
Serping1	0.947	0.965	0	-1.08845
Aldh1a1	0.415	0.658	0	-1.11389
Pcolce2	0.635	0.786	0	-1.11847
Cyb5a	0.881	0.954	0	-1.12311
Tsc22d3	0.432	0.662	0	-1.12344
Ifi205	0.108	0.409	0	-1.13194
Camk2n1	0.453	0.657	0	-1.13475
Ier2	0.789	0.835	2.11116e-245	-1.15345
Itm2b	0.989	0.998	0	-1.15509
Slc43a3	0.56	0.797	0	-1.1672
Tuba1b	0.738	0.894	0	-1.17012
Myoc	0.04	0.256	1.52724e-225	-1.17719
Ifi27l2a	0.812	0.893	4.63164e-290	-1.18626
Enpp2	0.049	0.409	0	-1.19156
Abca8a	0.433	0.738	0	-1.19439
Hspa1a	0.172	0.342	9.09697e-162	-1.19511
Tuba1a	0.93	0.979	0	-1.21075
H2B-EGFP	0.497	0.754	0	-1.21324
Gpx3	0.943	0.926	0	-1.22945
Ramp2	0.379	0.692	0	-1.23187
Scara5	0.033	0.404	0	-1.23194
Igfbp6	0.501	0.704	0	-1.24781
Glul	0.204	0.566	0	-1.25053
Crispld2	0.656	0.825	0	-1.27212
Lpl	0.663	0.802	0	-1.29847
Pla1a	0.18	0.542	0	-1.30368
Jund	0.908	0.962	0	-1.38082
Vwa1	0.18	0.639	0	-1.4866
Selenbp1	0.258	0.637	0	-1.50566
Fth1	0.995	0.999	0	-1.51724
Ms4a4d	0.224	0.688	0	-1.54682
Aldh2	0.618	0.883	0	-1.54773
Cd34	0.794	0.937	0	-1.55735
Mgst1	0.382	0.797	0	-1.56198
Tnxb	0.142	0.662	0	-1.56288
Sparcl1	0.564	0.87	0	-1.5763
Htra3	0.769	0.945	0	-1.58387
Adamts5	0.475	0.757	0	-1.58829
Rarres2	0.743	0.932	0	-1.65433
Gsta3	0.046	0.514	0	-1.72304
Dcn	0.998	0.995	0	-1.76202
Cxcl14	0.132	0.254	2.12645e-120	-1.77691
G0s2	0.333	0.704	0	-1.93239
Pi16	0.69	0.812	0	-1.96255
Smoc2	0.702	0.87	0	-1.98831
Ly6a	0.375	0.704	0	-1.99307
Hsd11b1	0.114	0.555	0	-2.15097
Apoe	0.649	0.732	0	-2.31154
Dpep1	0.333	0.784	0	-2.37356
Gstm1	0.348	0.922	0	-2.97071
Clec3b	0.264	0.796	0	-2.98456
Gsn	0.967	0.997	0	-4.19175

## Sheet: F-Act vs Rest
Gene	pct.1	pct.2	p_val_adj	Log2FoldChange
Cilp	0.566	0.291	3.16055e-195	1.15093
Meox1	0.785	0.537	1.8229836573992e-318	1.06005
Prg4	0.461	0.157	3.96656e-254	1.04133
Col8a1	0.921	0.718	0	1.02156
Cst6	0.37	0.143	2.53592e-228	1.00834
Ly6a	0.847	0.6	7.0273e-225	0.929284
Ckb	0.873	0.731	0	0.903997
Mfap5	0.988	0.922	0	0.842401
Aldh1a2	0.413	0.265	1.88208e-171	0.820975
Apod	0.417	0.211	1.67254e-120	0.8028
Fxyd5	0.781	0.538	1.00875e-254	0.758078
Ccl7	0.274	0.163	4.64265e-41	0.749595
Serpina3n	0.453	0.265	5.09914e-119	0.710562
Capg	0.803	0.585	9.43042e-228	0.68265
Vcan	0.775	0.542	1.95699e-211	0.667238
Ly6c1	0.419	0.216	4.16228e-106	0.666585
Mt2	0.476	0.353	5.02603e-56	0.648265
Tagln2	0.96	0.871	2.69077e-236	0.647106
Anxa2	0.972	0.919	3.78621e-243	0.636332
Ifi27l2a	0.968	0.859	1.44063e-186	0.62968
F2r	0.675	0.463	3.53026e-194	0.628108
Cd9	0.927	0.84	2.87455e-153	0.619566
Tspo	0.97	0.914	6.40118e-290	0.618803
Uap1	0.747	0.576	1.70447e-124	0.618574
S100a16	0.92	0.819	2.71598e-249	0.613545
Lgals1	1	0.992	1.96357e-276	0.605235
Serpine1	0.524	0.354	3.68427e-69	0.598254
Ldha	0.934	0.835	3.78883e-207	0.596585
Arpc1b	0.993	0.959	0	0.591129
Maff	0.468	0.237	1.68422e-174	0.586037
Nbl1	0.758	0.588	4.50036e-105	0.585882
Fbln2	0.977	0.883	2.59314e-218	0.584732
Fibin	0.782	0.647	4.92867e-101	0.578282
Tnfrsf12a	0.575	0.367	1.05144e-122	0.573564
Bhlhe40	0.55	0.327	3.86335e-141	0.571928
Fstl1	0.994	0.928	0	0.568768
Pcolce	0.986	0.959	1.00191e-182	0.567243
Timp1	0.708	0.473	2.78325e-116	0.559092
Crlf1	0.338	0.204	2.30463e-56	0.554109
Emp1	0.958	0.832	3.21112e-208	0.54863
Ier3	0.53	0.373	6.69119e-79	0.545438
Slc25a5	0.828	0.664	6.9436e-150	0.537929
Ccnd1	0.532	0.317	1.33158e-104	0.528991
Fhl2	0.432	0.277	2.94712e-88	0.519983
Tpm4	0.936	0.833	1.43062e-170	0.517085
Anxa1	0.942	0.834	1.11094e-166	0.513847
Tubb6	0.718	0.5	5.02198e-125	0.513445
Tubb3	0.263	0.108	1.16791e-96	0.512751
Pi16	0.928	0.76	3.79707e-166	0.505417
Crip1	0.994	0.984	9.57566e-97	0.501077
Rps27	0.999	0.999	6.72597e-259	-0.507463
Gas1	0.751	0.856	4.20477e-72	-0.513261
Rps27rt	0.611	0.745	3.18369e-117	-0.517984
Enpp2	0.235	0.366	1.18056e-68	-0.522926
G0s2	0.574	0.649	3.0207e-50	-0.526108
Rpl38	0.969	0.979	6.51497e-226	-0.541156
Pdlim3	0.118	0.262	1.00818e-99	-0.557761
Txnip	0.489	0.645	4.87312e-113	-0.570153
Rps21	0.949	0.972	2.06407e-263	-0.604622
Gstm1	0.883	0.802	6.27576e-192	-0.613184
Rps29	0.996	0.998	1.20337e-286	-0.632229
Dpep1	0.735	0.694	2.927e-120	-0.64117
Col1a2	0.994	0.978	3.62022e-247	-0.675957
Fam101b	0.217	0.273	2.02217e-136	-0.691125
Fbln5	0.591	0.727	1.84571e-140	-0.700089
Col1a1	0.987	0.954	4.92476e-265	-0.713958
Mdk	0.145	0.333	6.4535e-147	-0.738438
Lox	0.351	0.351	7.81021e-172	-0.743826
Thbs2	0.283	0.482	1.30282e-179	-0.75516
Clec3b	0.682	0.702	1.17619e-132	-0.770131
Ddah1	0.203	0.251	3.09037e-95	-0.801363
Ogn	0.8	0.872	1.48043e-243	-0.868881
Fbln1	0.704	0.847	1.96696e-211	-0.907206
Lpl	0.692	0.794	1.73485e-207	-0.975964
Timp3	0.542	0.787	3.95773e-233	-0.99181
Eln	0.543	0.662	8.10322e-102	-1.13858
1500015O10Rik	0.071	0.256	6.89086e-182	-1.29544
Fn1	0.429	0.489	9.31053e-289	-1.79735
Sfrp2	0.185	0.359	3.11073e-154	-1.8445
Ptn	0.169	0.373	1.85585e-194	-1.85333
Cthrc1	0.162	0.3	1.5979e-192	-2.00126
Apoe	0.586	0.745	4.15787e-234	-2.0365

## Sheet: F-SH vs Rest
Gene	pct.1	pct.2	p_val_adj	Log2FoldChange
Pi16	0.975	0.751	0	1.78637
Cd248	0.703	0.254	0	1.47436
Efhd1	0.611	0.095	0	1.46554
Gfpt2	0.772	0.376	0	1.34889
Tmem100	0.572	0.17	0	1.32107
Scara5	0.777	0.244	0	1.29554
Ly6a	0.959	0.577	0	1.26661
Clec3b	0.99	0.638	0	1.23373
Klf4	0.944	0.681	0	1.22279
Pcsk6	0.903	0.529	0	1.2078
Cd55	0.773	0.392	0	1.20158
Igfbp6	0.898	0.618	0	1.14212
Ly6c1	0.55	0.189	0	1.14093
Lrrn4cl	0.572	0.139	0	1.13439
Pcolce2	0.964	0.715	0	1.0922
Axl	0.963	0.783	0	1.04037
Efemp1	0.421	0.112	6.50446428333339e-311	1.02877
Adamts5	0.947	0.654	0	1.02697
Zfp385a	0.66	0.242	0	1.01875
Pla1a	0.781	0.411	0	0.97177
Cd34	0.996	0.893	0	0.970209
Uap1	0.819	0.562	0	0.970195
Tppp3	0.83	0.524	0	0.956934
Ifi27l2a	0.981	0.856	0	0.949435
Hn1	0.883	0.614	0	0.943704
Camk2n1	0.867	0.568	0	0.938876
Sema3c	0.405	0.094	0	0.934632
Ackr3	0.516	0.119	0	0.928334
Gstm1	0.989	0.78	0	0.913157
Ebf1	0.913	0.761	0	0.907403
Lims2	0.59	0.188	0	0.884783
Tnxb	0.881	0.501	0	0.883123
Ugdh	0.67	0.44	4.03804e-299	0.880836
Ppp1r14b	0.629	0.389	0	0.852073
Pgf	0.614	0.242	4.85135536716386e-310	0.847235
Emilin2	0.453	0.103	0	0.833789
Thbd	0.561	0.236	2.21983e-282	0.825948
Nbl1	0.81	0.578	6.62768e-235	0.80474
Selenbp1	0.815	0.515	6.28279e-267	0.803239
Klf2	0.918	0.784	7.9363e-168	0.789349
Adgrd1	0.443	0.127	0	0.788266
Myoc	0.438	0.17	7.92104e-191	0.780215
Ces1d	0.462	0.166	3.07236e-230	0.763593
C3	0.711	0.428	1.53041e-188	0.7511
Crip1	0.997	0.983	5.73213e-270	0.744325
S100a10	0.987	0.935	0	0.727278
Hs3st1	0.498	0.179	7.12307e-258	0.724884
Ablim1	0.589	0.256	2.64781e-264	0.69521
Ecm1	0.912	0.769	1.17531e-239	0.694468
Creb5	0.589	0.303	4.45209e-225	0.689764
Islr	0.863	0.663	7.33534e-239	0.687921
Timp2	0.997	0.961	0	0.682375
Thy1	0.393	0.191	4.48284e-176	0.678548
Atf5	0.761	0.521	1.47751e-180	0.676683
Serpinb6a	0.942	0.835	1.27996e-292	0.667208
Anxa3	0.745	0.603	5.15494e-157	0.666763
Jund	0.986	0.944	4.44515e-271	0.654151
Ramp2	0.838	0.591	3.45594e-222	0.652909
Ugp2	0.832	0.684	2.58328e-188	0.652755
1700019D03Rik	0.356	0.074	9.05547e-302	0.634034
Plpp3	0.913	0.728	1.91839e-195	0.633522
Qpct	0.7	0.434	3.22041e-184	0.616559
Uqcc2	0.846	0.696	5.63998e-233	0.608924
Limch1	0.332	0.099	7.23296e-216	0.608401
Lamc1	0.927	0.766	7.51908e-242	0.600565
Atf3	0.302	0.198	2.87524e-42	0.594516
Carhsp1	0.73	0.527	7.26463e-175	0.579823
Gsn	1	0.989	0	0.575722
Ddah2	0.941	0.804	7.64861e-247	0.574863
Man1a	0.583	0.326	2.05403e-168	0.574396
S100a6	1	0.995	0	0.557127
Nid1	0.953	0.842	1.37192e-190	0.554449
Ahnak2	0.808	0.63	1.16424e-157	0.542103
Phlda1	0.776	0.555	1.23572e-130	0.527986
Fhl1	0.832	0.656	6.53541e-159	0.527169
Ahnak	0.939	0.847	1.31885e-183	0.525254
Slco3a1	0.511	0.272	1.31869e-149	0.523506
Ptrf	0.791	0.615	4.36152e-160	0.52012
Klf3	0.636	0.46	1.27644e-134	0.517548
Rnase4	0.989	0.926	1.5928e-263	0.517011
Gda	0.419	0.184	2.65531e-150	0.516878
Anxa1	0.938	0.835	2.4423e-154	0.514326
Gas7	0.461	0.244	1.82054e-132	0.513386
Entpd2	0.935	0.747	6.93143e-232	0.513298
Gm12840	0.303	0.182	1.74826e-47	0.510848
Hmcn2	0.349	0.123	2.00736e-161	0.504062
Chst1	0.27	0.062	1.59476e-200	0.503863
Emilin1	0.599	0.741	1.22337e-126	-0.503056
Gxylt2	0.395	0.481	7.33815e-123	-0.510342
Loxl3	0.193	0.368	1.47766e-131	-0.514073
Emp1	0.837	0.858	2.02033e-113	-0.514234
Rasl11b	0.16	0.342	3.91049e-128	-0.523068
Vamp5	0.351	0.507	6.3374e-137	-0.534508
Myl9	0.089	0.256	2.32885e-115	-0.544353
Fam198b	0.34	0.51	4.73401e-128	-0.549459
Gas6	0.626	0.698	1.88286e-78	-0.549927
Vcam1	0.404	0.559	8.49815e-92	-0.560762
Lbh	0.265	0.436	1.96621e-118	-0.568821
Sept4	0.118	0.299	5.39213e-128	-0.585757
Tgfb3	0.345	0.483	1.03759e-169	-0.588341
Synpo	0.067	0.327	9.78286e-226	-0.593239
Fhl2	0.147	0.337	3.49159e-126	-0.598466
Hsd11b1	0.496	0.469	1.0187e-107	-0.599272
Cxcl12	0.319	0.417	1.43287e-106	-0.600767
Tpm2	0.233	0.41	5.98046e-131	-0.619488
Igf1	0.505	0.655	1.10291e-110	-0.620745
Apod	0.203	0.257	3.19693e-68	-0.627764
Lgmn	0.243	0.39	8.08633e-149	-0.630477
Col6a3	0.478	0.658	1.44897e-144	-0.639728
C1qtnf6	0.274	0.471	5.90752e-154	-0.64152
Ppic	0.64	0.733	1.00182e-211	-0.648027
Col4a2	0.494	0.614	1.14451e-180	-0.655166
Marcksl1	0.039	0.284	5.58085e-228	-0.661418
Gadd45b	0.224	0.441	7.66243e-130	-0.669024
Crlf1	0.112	0.251	6.67922e-86	-0.670462
Ndufa4l2	0.399	0.601	3.57596e-128	-0.674105
Mfap2	0.274	0.468	1.32548e-163	-0.679797
Il11ra1	0.65	0.802	4.38601e-200	-0.683631
Fgl2	0.112	0.283	2.36384e-114	-0.687053
Pdlim3	0.066	0.273	1.32062e-164	-0.698994
Bgn	0.986	0.989	0	-0.714917
Cpe	0.039	0.264	7.51708e-209	-0.738151
Sparc	0.998	0.99	9.90816e-218	-0.763415
Tmem176a	0.032	0.274	3.49182e-233	-0.764511
Itgbl1	0.321	0.535	3.85829e-168	-0.764681
Id3	0.743	0.836	4.08123e-161	-0.818361
Igfbp7	0.999	0.994	0	-0.83337
Thbs1	0.223	0.391	8.26984e-105	-0.836371
Actn1	0.114	0.398	1.20293e-278	-0.844115
Fxyd6	0.66	0.747	1.38285e-228	-0.864139
Fam101b	0.151	0.287	2.24316e-185	-0.899226
Tm4sf1	0.658	0.807	1.2055e-294	-0.915411
Ctgf	0.142	0.377	2.88516e-188	-0.91936
Mdk	0.084	0.345	5.03616e-250	-0.926645
Meox1	0.395	0.619	6.21691e-167	-0.941412
Ltbp2	0.072	0.323	2.19276e-213	-0.943845
Pdgfrl	0.263	0.533	2.16935e-256	-0.95006
Frzb	0.238	0.547	0	-0.979361
Cst3	0.994	0.997	1.05508e-281	-0.983658
Dkk3	0.112	0.339	3.67755e-217	-0.985731
Rbp1	0.832	0.941	0	-1.00414
Csrp2	0.516	0.645	4.89085e-287	-1.12551
Tagln	0.07	0.275	3.17721e-166	-1.12909
Tmem176b	0.058	0.395	0	-1.1396
Col5a2	0.605	0.718	0	-1.14864
Acta2	0.078	0.29	1.65283e-155	-1.21867
Col3a1	0.986	0.975	1.20398545481607e-312	-1.27434
Col8a1	0.64	0.778	5.60348329986915e-311	-1.32435
Cilp	0.172	0.374	7.21949e-134	-1.3247
Eln	0.623	0.645	2.9582e-214	-1.33543
Col1a2	0.989	0.979	0	-1.34221
Wisp2	0.234	0.426	5.01684e-156	-1.42793
Mgp	0.958	0.988	0	-1.43072
1500015O10Rik	0.027	0.264	3.37326e-259	-1.43439
Ddah1	0.03	0.287	3.8589e-277	-1.49614
Mfap4	0.389	0.661	6.98803e-262	-1.51796
Lox	0.104	0.403	0	-1.51968
Col1a1	0.959	0.96	0	-1.61023
Fn1	0.522	0.47	0	-1.66868
Timp1	0.302	0.559	2.68199e-304	-1.83575
Apoe	0.603	0.741	8.04329e-211	-1.89902
Sfrp2	0.184	0.358	8.61596e-214	-2.07967
Postn	0.309	0.579	6.67468e-307	-2.26108
Ptn	0.085	0.39	0	-2.27617
Cthrc1	0.064	0.32	9.68071e-259	-2.41424

## Sheet: F-Trans vs Rest
Gene	pct.1	pct.2	p_val_adj	Log2FoldChange
Fgl2	0.686	0.217	0	1.68051
Apoe	0.959	0.696	0	1.66358
Inmt	0.323	0.117	3.80086e-99	1.49633
Cfh	0.989	0.89	0	1.22059
Srpx	0.592	0.346	1.25727e-272	1.19
Fbln1	0.955	0.811	5.15212e-276	1.1576
Gsn	1	0.991	5.53236883120498e-310	1.12377
Fmo2	0.555	0.25	4.31058e-176	1.10658
Timp3	0.89	0.732	3.24876e-161	1.05126
Vit	0.458	0.125	1.06817e-190	0.968171
Gas6	0.808	0.675	4.81336e-128	0.959593
Apod	0.258	0.247	2.59279e-50	0.932276
Gstm5	0.664	0.528	2.03778e-238	0.924352
Cdc42ep3	0.414	0.214	4.98807e-119	0.829733
Myoc	0.333	0.207	3.85072e-36	0.802281
Id2	0.605	0.459	4.22482e-91	0.787676
C3	0.602	0.466	8.16925e-56	0.778304
Il11ra1	0.868	0.768	3.66724e-148	0.762908
Penk	0.275	0.13	4.12234e-59	0.755331
Ecm1	0.862	0.788	1.08316e-135	0.749723
Ccdc80	0.992	0.974	1.19548e-132	0.745451
Osr1	0.414	0.256	1.65755e-75	0.745173
Il33	0.439	0.268	1.73587e-71	0.74228
Gadd45g	0.449	0.341	1.46328e-57	0.732772
Mgp	0.999	0.982	1.62927e-162	0.718801
Sepp1	0.975	0.93	5.67525e-140	0.71542
Igf1	0.677	0.625	1.11025e-88	0.695953
C4b	0.253	0.108	4.41312e-67	0.678944
Mgst1	0.849	0.71	3.97302e-105	0.671076
Olfml2b	0.492	0.311	1.84107e-118	0.669574
Trf	0.372	0.288	2.17166e-47	0.653357
Serping1	0.996	0.959	2.2314e-123	0.65137
Pdlim3	0.444	0.219	2.32239e-76	0.648187
Lsamp	0.339	0.148	4.42421e-89	0.636225
Cpe	0.416	0.209	1.82209e-72	0.629636
Tgfbi	0.54	0.347	2.41269e-58	0.622889
Slc16a2	0.47	0.309	1.7534e-107	0.612246
Cst3	0.999	0.996	9.11114e-124	0.599446
Gpx3	0.933	0.929	3.26435e-51	0.58898
Tmem176b	0.381	0.333	4.35662e-50	0.58668
Dpep1	0.799	0.693	1.01972e-40	0.583692
Fam46a	0.442	0.348	3.81689e-75	0.556015
Igfbp4	0.961	0.942	8.6135e-63	0.553096
Ndrg2	0.697	0.582	2.84586e-79	0.553078
Prg4	0.32	0.201	7.43633e-20	0.530279
Itm2b	0.999	0.996	3.8271e-173	0.529171
Cxcl12	0.46	0.395	3.96946e-32	0.513018
C1s1	0.472	0.371	3.20293e-43	0.505596
Qpct	0.615	0.469	8.92376e-57	0.505343
Pid1	0.557	0.445	1.15627e-55	0.503134
Wisp2	0.417	0.39	4.23768e-08	0.501877
Cald1	0.76	0.874	1.40991e-60	-0.510501
Ckb	0.593	0.77	2.56632e-50	-0.514948
Sh3bgrl3	0.626	0.772	2.60162e-60	-0.518959
Ccnd1	0.173	0.37	8.9685e-48	-0.528165
H2afz	0.632	0.78	5.3008e-65	-0.533366
Mfap5	0.904	0.936	2.25382e-36	-0.534469
Fhl2	0.093	0.322	8.07676e-76	-0.535974
Hspa1a	0.232	0.318	1.54475e-14	-0.539035
Pcsk6	0.437	0.607	4.90319e-54	-0.542528
Jup	0.229	0.504	7.50119e-85	-0.545889
Tnfrsf12a	0.2	0.421	2.07786e-57	-0.547314
Gsta3	0.307	0.438	4.52724e-29	-0.56352
Lsp1	0.575	0.76	5.42087e-57	-0.56624
Ppic	0.561	0.73	2.29226e-67	-0.573165
Adamts5	0.571	0.717	1.68003e-44	-0.573253
Plxdc2	0.463	0.733	1.43991e-93	-0.591219
Cyr61	0.368	0.619	6.28533e-63	-0.602678
Hspg2	0.479	0.745	1.02105e-97	-0.611927
Tnfaip2	0.133	0.416	5.73012e-98	-0.612614
Sfrp2	0.326	0.328	1.29861e-11	-0.619315
Timp1	0.506	0.515	8.4716e-25	-0.624969
Ctgf	0.178	0.35	2.12592e-50	-0.632424
Col5a1	0.422	0.63	3.87749e-72	-0.649693
Anxa3	0.415	0.646	6.08131e-68	-0.651074
Fbln2	0.765	0.911	2.43378e-93	-0.65872
Lgals1	0.982	0.995	3.7838e-133	-0.662041
Cilp	0.209	0.35	3.1249e-22	-0.675374
Lamb1	0.307	0.625	3.69864e-116	-0.69551
Fstl1	0.903	0.943	1.48782e-87	-0.713443
Oaf	0.617	0.833	1.92373e-115	-0.751837
Col1a2	0.981	0.981	1.14373e-73	-0.759659
Smoc2	0.748	0.847	4.78665e-57	-0.763546
Srpx2	0.329	0.664	8.732e-130	-0.789646
Col4a1	0.45	0.711	1.04255e-111	-0.794858
Loxl2	0.196	0.531	5.02702e-130	-0.810231
Serpine1	0.184	0.401	4.97793e-58	-0.819787
Fibin	0.378	0.696	1.54593e-113	-0.82001
Col5a2	0.563	0.71	7.99875e-94	-0.847901
Marcks	0.464	0.772	2.32746e-138	-0.854427
Ltbp2	0.068	0.298	1.2492e-88	-0.855508
Fam101b	0.108	0.277	2.22719e-73	-0.857235
Col1a1	0.95	0.96	2.52786e-81	-0.906618
Col4a2	0.317	0.617	1.26903e-141	-0.9173
Fbn1	0.579	0.795	1.04434e-139	-0.942918
Hsd11b1	0.343	0.485	2.31438e-59	-0.95329
Acta2	0.093	0.267	6.98587e-50	-1.01095
Aspn	0.551	0.751	2.40457e-94	-1.05273
Tagln	0.049	0.256	1.24758e-80	-1.07308
Prss23	0.205	0.6	1.57248e-183	-1.09579
Lox	0.166	0.367	1.19598e-82	-1.1213
Pla1a	0.15	0.503	1.46724e-161	-1.17237
Thbs1	0.089	0.385	1.1154e-125	-1.17745
Ddah1	0.055	0.259	9.56916e-86	-1.25893
Col8a1	0.547	0.772	9.2722e-153	-1.39605
Ptn	0.204	0.349	1.85095e-56	-1.42975
Cthrc1	0.076	0.293	5.09506e-88	-2.06551
Fn1	0.309	0.493	3.50721e-174	-2.17725
Postn	0.311	0.551	2.27134e-147	-2.35775

## Sheet: F-WntX vs Rest
Gene	pct.1	pct.2	p_val_adj	Log2FoldChange
Wif1	0.625	0.006	0	3.65185
Cytl1	0.302	0.038	3.46596e-166	3.08322
Dkk3	0.936	0.266	0	2.79211
Prg4	0.629	0.188	1.46389e-272	2.6457
Apoe	0.998	0.702	0	2.63367
Clu	0.474	0.039	0	2.35092
Comp	0.392	0.182	3.76665e-119	2.03373
1500015O10Rik	0.682	0.198	3.18623e-213	1.89028
Fmod	0.391	0.134	2.72641e-164	1.87347
Dbi	0.972	0.853	0	1.82826
Lmcd1	0.675	0.099	0	1.75829
Igfbp5	0.414	0.123	2.61977e-124	1.6726
Ccdc80	1	0.974	0	1.65856
Cpe	0.764	0.196	0	1.63853
Angptl7	0.287	0.114	1.59577e-76	1.5965
Pdlim3	0.741	0.21	0	1.59609
Vim	1	0.995	0	1.56762
Prelp	0.932	0.82	0	1.48234
Cox4i2	0.522	0.065	0	1.48116
Tgfbi	0.773	0.34	6.95782e-239	1.46736
Atp1b1	0.515	0.042	0	1.4471
Paqr6	0.475	0.022	0	1.43221
Cadm1	0.588	0.011	0	1.42347
Il11ra1	0.969	0.765	0	1.35276
Itih5	0.748	0.435	9.59868e-283	1.35078
Myoc	0.488	0.202	7.88906e-93	1.33765
Abi3bp	0.761	0.517	9.65412e-254	1.33241
Trf	0.685	0.273	2.13186e-179	1.31317
Mgp	1	0.982	5.73107e-137	1.30131
Smim3	0.629	0.15	0	1.28402
Msx1	0.567	0.163	4.67833e-245	1.27761
Bambi	0.622	0.149	2.08457e-286	1.27309
Timp3	0.969	0.732	1.16251e-200	1.26418
Ccl19	0.46	0.061	1.04228e-224	1.26117
Tmem176b	0.765	0.313	1.07465e-185	1.24135
Rspo3	0.396	0.005	0	1.23268
Cdc42ep3	0.601	0.21	3.7563e-177	1.1632
Scara3	0.581	0.144	3.46783e-283	1.16007
Map1b	0.681	0.38	1.80403e-249	1.11505
Dpt	0.994	0.944	1.8751e-279	1.1016
Socs2	0.921	0.718	5.64138e-250	1.09917
Cd9	0.996	0.848	4.27524e-260	1.09509
Aldh1a1	0.886	0.599	8.25066e-177	1.09382
Cyp2e1	0.306	0.01	5.32896e-255	1.09279
Tst	0.419	0.097	1.12762e-168	1.06845
Fxyd6	0.896	0.723	3.32251e-131	1.03118
Aldh3a1	0.342	0.031	1.73437e-213	1.024
Tbx20	0.768	0.48	2.21982e-165	1.02017
S100b	0.346	0.026	1.96614e-247	1.0105
Fgl2	0.489	0.241	1.66163e-78	0.996704
Stk17b	0.412	0.088	3.1612e-237	0.983083
Tspan7	0.431	0.047	2.41242e-256	0.975172
Shisa4	0.625	0.267	2.86977e-207	0.968518
Tmem176a	0.54	0.216	8.00066e-105	0.957115
2010111I01Rik	0.628	0.298	1.40067e-174	0.928077
Fth1	1	0.998	3.68415e-276	0.894634
Tcf12	0.634	0.338	1.25271e-178	0.882852
Igf1	0.8	0.62	1.23949e-90	0.879567
Ptx3	0.387	0.094	3.76179e-119	0.877296
Cpxm2	0.375	0.04	2.87129e-188	0.864049
Serpinf1	0.978	0.919	1.57379e-137	0.86369
Ccnd2	0.647	0.411	1.22301e-88	0.862429
Ahsg	0.259	0.04	5.01522e-93	0.859522
Ptgfr	0.371	0.056	4.48567e-162	0.857743
Npr1	0.395	0.064	5.9478e-170	0.829364
Fam19a5	0.356	0.059	5.49434e-185	0.824474
Dcn	1	0.995	4.55967e-174	0.820308
Lum	0.993	0.976	1.99745e-90	0.814154
Art3	0.356	0.051	1.30282e-158	0.810826
St3gal4	0.641	0.363	2.03754e-124	0.810748
Pdgfrl	0.776	0.471	1.12056e-90	0.797345
Lmo4	0.798	0.643	5.38977e-96	0.794888
Itm2b	1	0.996	6.8935e-203	0.79443
Frzb	0.682	0.484	2.20987e-74	0.788988
Gstm5	0.774	0.526	6.30985e-106	0.780607
Pdgfa	0.414	0.135	1.70102e-142	0.779155
Shisa2	0.305	0.005	6.52634e-283	0.772776
Mdk	0.6	0.284	1.19322e-75	0.772187
Csrp2	0.864	0.61	3.12492e-64	0.768819
6330403K07Rik	0.308	0.053	2.46902e-135	0.746739
Pamr1	0.336	0.177	1.84854e-98	0.742265
Gas6	0.789	0.68	2.78488e-40	0.741702
Id1	0.456	0.227	9.19801e-64	0.739147
Cfh	0.971	0.893	7.28722e-93	0.726547
Nt5dc2	0.256	0.124	1.03059e-138	0.708988
Etv1	0.488	0.181	1.40418e-101	0.707984
Mfap2	0.701	0.42	2.27148e-68	0.698898
Colec12	0.672	0.446	2.35813e-80	0.689271
Tnfaip8	0.44	0.16	2.74573e-110	0.686847
Fbln1	0.953	0.815	1.86624e-82	0.679641
Mafb	0.533	0.288	1.27851e-49	0.678139
Lgmn	0.584	0.352	4.21281e-67	0.675184
Olfml3	0.884	0.818	4.40789e-64	0.673589
Bmyc	0.509	0.307	5.60307e-82	0.670632
Olfml2b	0.556	0.313	7.76983e-72	0.664099
Cdh11	0.34	0.11	2.1882e-104	0.663407
Ppp3ca	0.728	0.53	1.77806e-93	0.656965
Sepp1	0.965	0.932	4.44483e-53	0.655691
Fam3c	0.581	0.373	1.11382e-98	0.655327
Limch1	0.401	0.125	5.73953e-86	0.655246
Vcam1	0.609	0.528	4.72575e-41	0.654232
Rin2	0.46	0.245	3.64201e-85	0.64807
Prnp	0.748	0.574	8.39667e-78	0.646528
Ifi27	0.939	0.804	1.57193e-86	0.639509
Pde4d	0.288	0.047	9.78544e-134	0.625853
Nudt4	0.496	0.269	2.18028e-83	0.622824
Scx	0.256	0.072	1.91581e-54	0.622626
Hist1h2bc	0.76	0.531	1.67991e-61	0.621231
Tceal3	0.267	0.008	4.59007e-207	0.620575
Emp2	0.622	0.41	1.26411e-71	0.620103
4930523C07Rik	0.668	0.45	1.68182e-71	0.619846
Il33	0.427	0.274	1.36215e-28	0.611045
Cracr2b	0.258	0.018	7.74665e-159	0.605493
C4b	0.262	0.112	6.84083e-35	0.604941
Gnai1	0.286	0.037	8.64661e-129	0.593488
Vit	0.366	0.139	2.30099e-51	0.590043
Mgst1	0.88	0.712	2.51611e-48	0.586157
Meis2	0.504	0.296	1.18777e-59	0.580152
Thbs1	0.485	0.355	1.22624e-17	0.573395
Wfdc1	0.34	0.09	6.8233e-79	0.573387
Maged2	0.736	0.607	1.10204e-47	0.571344
Cntfr	0.287	0.071	6.49134e-69	0.570087
Nfix	0.836	0.698	1.7321e-66	0.564823
Wwtr1	0.612	0.417	4.63686e-66	0.564718
Hist1h1c	0.48	0.328	1.30689e-29	0.562541
Bok	0.452	0.336	9.34261e-47	0.560463
Sdc3	0.525	0.349	1.52235e-61	0.559341
Mfap4	0.734	0.607	6.75735e-14	0.558496
Efemp1	0.359	0.155	1.85689e-38	0.556649
Meox1	0.672	0.576	2.31289e-17	0.555849
Gng11	0.791	0.671	2.41311e-57	0.551228
Stxbp6	0.298	0.094	1.24268e-66	0.549661
Csrp1	0.753	0.542	2.60237e-50	0.546426
Gata6	0.599	0.396	2.27534e-54	0.545304
Rasl11b	0.429	0.304	7.08275e-41	0.543459
Rnpep	0.451	0.235	6.06037e-60	0.541625
Nfib	0.886	0.758	4.17362e-63	0.541012
Crip2	0.988	0.916	1.02985e-83	0.535808
Sdpr	0.405	0.185	5.47796e-48	0.532827
Nkd1	0.265	0.045	1.21616e-105	0.531083
Fibin	0.567	0.677	1.59363e-60	0.528493
Hmgcs2	0.424	0.212	5.32575e-42	0.528325
Maob	0.332	0.108	2.14197e-61	0.52635
Gnb4	0.498	0.316	1.57208e-54	0.524486
3632451O06Rik	0.276	0.05	4.68919e-91	0.522166
Ptgis	0.876	0.833	2.39441e-54	0.522165
Cd59a	0.274	0.081	1.15174e-76	0.522098
Slc29a1	0.792	0.651	2.13754e-44	0.521298
Plxdc1	0.278	0.057	3.61725e-82	0.518457
Kazald1	0.52	0.308	1.76389e-41	0.515959
Arhgdib	0.534	0.308	5.73189e-43	0.512871
Fam26e	0.288	0.101	3.64522e-71	0.512117
Por	0.509	0.348	1.58304e-37	0.509829
Islr	0.594	0.703	1.25322e-32	-0.500519
Mat2a	0.56	0.706	8.32767e-39	-0.500846
Gnb2l1	0.951	0.966	6.31371e-68	-0.504348
Crispld2	0.702	0.799	1.63532e-20	-0.505938
Gm10073	0.659	0.759	6.88965e-41	-0.506893
Vamp5	0.327	0.488	6.08549e-38	-0.507628
Pdzd2	0.086	0.282	9.64827e-40	-0.507638
Zfp36	0.364	0.5	3.11832e-15	-0.511711
Tubb2b	0.031	0.267	1.70473e-69	-0.511931
Eva1b	0.611	0.752	1.0704e-44	-0.512028
Sulf2	0.228	0.437	7.96224e-36	-0.51548
H2afz	0.706	0.771	3.25981e-41	-0.51579
Ptgfrn	0.175	0.426	1.16368e-51	-0.518387
Mrc2	0.121	0.351	7.07274e-50	-0.518535
Ahnak	0.761	0.868	1.81234e-41	-0.523523
Cyr61	0.441	0.608	1.35115e-18	-0.525922
Rem1	0.126	0.322	8.36304e-41	-0.526152
Bst2	0.391	0.605	3.20407e-32	-0.526163
Ar	0.106	0.316	1.01046e-41	-0.526376
Ugp2	0.601	0.716	2.08813e-39	-0.529338
Adamtsl2	0.173	0.316	8.32685e-24	-0.530072
Btg2	0.554	0.647	2.24672e-11	-0.530751
Msc	0.078	0.274	1.43192e-40	-0.5377
Tpst1	0.434	0.638	2.66424e-49	-0.539138
Ace	0.446	0.639	8.73041e-44	-0.54485
Pfn1	0.378	0.609	4.02391e-35	-0.545847
Cndp2	0.115	0.366	2.66791e-58	-0.549485
Sh3bp5	0.142	0.393	9.01599e-55	-0.550032
Sh3glb1	0.701	0.846	1.3425e-59	-0.551675
Creb3l2	0.293	0.522	3.62029e-44	-0.557403
Bicc1	0.544	0.782	4.61846e-53	-0.557743
Rpl29	0.967	0.977	1.83264e-101	-0.558917
Fhl2	0.136	0.313	1.05151e-38	-0.559847
Junb	0.838	0.907	1.34928e-17	-0.564784
Man1a	0.147	0.383	1.71731e-50	-0.565169
Capg	0.473	0.631	1.09328e-36	-0.565782
Cd34	0.904	0.911	8.60447e-43	-0.567369
Ltbp2	0.181	0.285	3.67443e-26	-0.568421
Arap1	0.135	0.398	6.66501e-59	-0.568919
Apod	0.128	0.254	4.86813e-14	-0.569359
Igfbp4	0.873	0.947	1.61602e-44	-0.570741
Atf4	0.388	0.642	1.0076e-53	-0.577069
Gpc6	0.334	0.599	5.20448e-50	-0.57774
Glipr2	0.264	0.521	7.49352e-53	-0.57916
Kdelr3	0.474	0.681	2.51664e-52	-0.579559
Mt2	0.233	0.383	5.05212e-17	-0.592048
H2-K1	0.596	0.789	3.29721e-45	-0.593514
Ifngr1	0.544	0.731	8.62348e-51	-0.594107
Mndal	0.018	0.268	1.37923e-81	-0.594302
Cd302	0.613	0.785	1.16681e-56	-0.595239
Thbd	0.081	0.303	3.4503e-48	-0.595856
Pcolce	0.948	0.965	1.10855e-56	-0.597667
Pgf	0.16	0.314	6.17128e-26	-0.597761
Carhsp1	0.322	0.575	4.04294e-53	-0.600858
P4ha1	0.271	0.532	5.08876e-66	-0.601324
Itgbl1	0.327	0.507	3.75467e-31	-0.602124
H2B-EGFP	0.538	0.716	1.21276e-46	-0.605713
Sdc2	0.754	0.889	6.44009e-59	-0.609002
Wisp2	0.267	0.399	8.123e-11	-0.609456
Sept8	0.195	0.474	2.63368e-72	-0.612405
Mnda	0.024	0.275	4.38291e-83	-0.613877
Pdgfra	0.212	0.472	4.08169e-54	-0.618209
1700025G04Rik	0.127	0.42	6.16451e-71	-0.619829
Pdlim1	0.268	0.555	7.42551e-60	-0.620957
Ftl1	1	1	7.25414e-86	-0.624665
Col6a1	0.838	0.923	1.83144e-68	-0.62496
Vgll3	0.045	0.334	5.04776e-87	-0.627316
Pcdh19	0.014	0.294	1.2923e-100	-0.632957
Eif4ebp1	0.299	0.572	3.21658e-63	-0.633394
Dbn1	0.225	0.49	6.66706e-67	-0.637958
S100a10	0.899	0.946	1.31678e-52	-0.638655
Crip1	0.971	0.986	1.85405e-47	-0.642404
Fos	0.818	0.885	1.27998e-24	-0.64307
Lims2	0.029	0.27	5.71713e-73	-0.647444
Celf2	0.441	0.711	2.43712e-73	-0.648217
Rbms1	0.5	0.772	3.16459e-78	-0.656675
Ly6e	0.608	0.841	7.25069e-64	-0.665202
Podn	0.047	0.279	8.90696e-65	-0.665871
Sept11	0.311	0.608	1.19544e-71	-0.679888
Col5a3	0.067	0.334	4.37717e-72	-0.67997
Cdc42ep2	0.136	0.424	3.35347e-69	-0.681997
Ppp1r14a	0.126	0.371	5.30257e-56	-0.689174
Lama4	0.241	0.542	6.23602e-74	-0.68922
Sulf1	0.238	0.525	1.8209e-72	-0.690285
Scn7a	0.175	0.487	2.16288e-71	-0.690806
Pcolce2	0.545	0.77	7.7718e-53	-0.703019
Mmp14	0.371	0.609	9.76566e-59	-0.705618
Fosb	0.339	0.562	7.75566e-40	-0.710248
P4hb	0.573	0.765	8.18367e-82	-0.710751
Acvrl1	0.173	0.501	5.09427e-88	-0.718238
Serf1	0.151	0.442	1.45267e-80	-0.72581
Zfp385a	0.078	0.327	5.84911e-73	-0.726496
Kcnk2	0.025	0.257	5.35126e-73	-0.727345
Col6a3	0.44	0.637	6.02619e-63	-0.733281
Gxylt2	0.258	0.478	7.66489e-56	-0.733542
Klf6	0.361	0.606	6.34297e-55	-0.733785
Neat1	0.565	0.765	2.37018e-56	-0.74378
Fam101b	0.135	0.27	2.47476e-30	-0.750088
Tubb6	0.299	0.551	2.37918e-61	-0.750295
Ngf	0.072	0.361	2.87888e-78	-0.750757
Gpsm3	0.027	0.365	4.41891e-123	-0.752728
Ctgf	0.181	0.345	1.83926e-43	-0.754846
Cygb	0.749	0.942	2.26983e-106	-0.755787
Svep1	0.035	0.341	1.54655e-98	-0.760301
Uap1	0.424	0.616	2.1711e-70	-0.768826
S100a6	0.993	0.996	2.73431e-115	-0.775869
Errfi1	0.105	0.368	3.67144e-75	-0.780142
Slc43a3	0.572	0.763	1.18587e-66	-0.786701
Marcks	0.551	0.758	3.54038e-72	-0.787659
Ebf2	0.042	0.387	2.37001e-114	-0.790614
Gfpt2	0.239	0.455	2.53643e-64	-0.792853
Itgb5	0.412	0.694	3.45893e-86	-0.797747
Ifi203	0.028	0.345	3.01605e-108	-0.808294
C1s1	0.115	0.394	5.05365e-71	-0.81613
Socs3	0.292	0.51	3.23194e-43	-0.82001
Ppic	0.56	0.725	1.47672e-93	-0.822631
Lama2	0.315	0.65	5.61868e-100	-0.828672
Nbl1	0.347	0.633	1.47016e-61	-0.828872
C1qtnf6	0.178	0.451	9.01453e-91	-0.831556
Nnmt	0.245	0.627	3.15449e-108	-0.832937
Jup	0.147	0.5	4.58109e-104	-0.841522
Abca8a	0.436	0.695	1.17784e-70	-0.846082
Col14a1	0.289	0.536	3.31655e-55	-0.848243
Cp	0.364	0.664	1.08374e-76	-0.84901
Rnase4	0.798	0.945	6.49052e-117	-0.850866
Klf2	0.669	0.815	6.10463e-41	-0.85311
Timp1	0.535	0.513	1.00988e-33	-0.856917
Camk2n1	0.405	0.631	3.98117e-81	-0.862151
S100a11	0.932	0.978	4.27985e-176	-0.865242
6030408B16Rik	0.048	0.326	1.53601e-87	-0.875791
Dusp1	0.546	0.715	9.14427e-41	-0.877913
Col5a2	0.625	0.702	1.12697e-78	-0.897376
Nav1	0.271	0.64	2.43781e-115	-0.900041
Spry1	0.191	0.549	4.00364e-106	-0.911115
Aldh1a2	0.042	0.305	3.68676e-80	-0.924517
Serpinh1	0.961	0.984	7.75658e-187	-0.929271
Lbh	0.088	0.424	3.99568e-105	-0.929831
Atf5	0.318	0.576	4.40566e-77	-0.945785
Sparc	0.981	0.992	3.73718e-110	-0.94614
Col1a1	0.968	0.959	3.74805e-56	-0.947697
Hspa1a	0.234	0.315	1.44834e-51	-0.950495
G0s2	0.506	0.643	4.44302e-54	-0.955579
Mt1	0.422	0.687	3.49279e-59	-0.961516
Loxl1	0.796	0.931	2.91067e-172	-0.963489
Cd248	0.039	0.347	4.53078e-104	-0.967704
Heg1	0.254	0.643	3.33313e-122	-0.967924
Slc1a5	0.148	0.583	9.15406e-143	-0.972961
Tnfaip2	0.035	0.413	1.23578e-142	-0.984393
Tnxb	0.285	0.582	5.36412e-93	-0.998011
Serping1	0.868	0.967	2.33408e-116	-0.999243
Ly6c1	0.056	0.262	1.25974e-56	-1.00151
Ifi27l2a	0.572	0.894	1.77317e-129	-1.02302
Srpx2	0.298	0.656	1.56267e-125	-1.0254
Akap12	0.156	0.569	3.39706e-138	-1.02851
Sfrp1	0.492	0.666	2.55709e-63	-1.03157
Col5a1	0.333	0.629	3.25313e-112	-1.03179
Tmsb10	0.911	0.985	2.81853e-270	-1.04062
Oaf	0.566	0.83	2.96831e-135	-1.04536
Aspn	0.46	0.75	2.35631e-79	-1.06673
Medag	0.349	0.747	1.33464e-156	-1.07209
Scara5	0.041	0.352	4.93378e-110	-1.08589
Col1a2	0.98	0.981	1.01636e-89	-1.09459
Fstl1	0.907	0.942	1.19364e-145	-1.09582
Lsp1	0.512	0.758	2.46226e-134	-1.10193
Ndufa4l2	0.184	0.587	5.40908e-120	-1.10234
Cd55	0.101	0.477	1.23636e-132	-1.10356
Ifi205	0.031	0.371	1.5717e-119	-1.1043
Vwa1	0.215	0.573	1.44697e-122	-1.12854
Axl	0.546	0.829	3.38881e-162	-1.13431
C3	0.198	0.492	7.93734e-68	-1.14252
Cald1	0.572	0.881	1.56767e-184	-1.16113
Entpd2	0.408	0.8	7.47566e-158	-1.17532
Serpine1	0.131	0.398	1.11125e-69	-1.21369
Emp1	0.669	0.864	2.43891e-161	-1.21442
Gsta3	0.108	0.445	1.12613e-99	-1.27589
Mfap5	0.789	0.942	1.82327e-143	-1.28836
Hspg2	0.269	0.748	2.04481e-223	-1.29001
Ms4a4d	0.166	0.626	8.55598e-168	-1.29514
Lamb1	0.127	0.626	4.94644e-209	-1.30682
Serpine2	0.395	0.831	2.49294e-181	-1.31099
Col15a1	0.356	0.762	1.38758e-166	-1.32416
Jun	0.804	0.902	7.93722e-100	-1.35002
Spon2	0.056	0.428	6.66848e-126	-1.35121
Ogn	0.481	0.88	5.51456e-196	-1.399
Col4a2	0.144	0.617	2.33646e-191	-1.4018
Phlda1	0.155	0.617	1.97405e-167	-1.4019
Ly6a	0.336	0.66	4.28895e-86	-1.43235
Pcsk6	0.136	0.618	6.64779e-191	-1.43635
Col4a1	0.235	0.715	9.9557e-209	-1.44269
Prss23	0.087	0.595	3.68076e-205	-1.47242
Lox	0.067	0.366	1.87902e-102	-1.48905
Col3a1	0.959	0.978	5.71885e-116	-1.50818
Pla1a	0.055	0.498	7.74728e-180	-1.51192
Sparcl1	0.492	0.831	7.39634e-174	-1.51412
Lpl	0.435	0.795	3.52721e-155	-1.53019
Lamc1	0.274	0.822	1.47389e-302	-1.54131
Anxa3	0.104	0.656	5.33784e-242	-1.61557
Fbn1	0.427	0.797	2.55121e-243	-1.62596
Nid1	0.386	0.887	0	-1.65926
Hsd11b1	0.188	0.489	1.39593e-110	-1.67362
Klf4	0.319	0.749	1.13544e-179	-1.79224
Adamts5	0.231	0.731	5.72639e-234	-1.80172
Cxcl1	0.146	0.459	1.44555e-89	-1.8175
Cthrc1	0.186	0.28	1.28499e-56	-1.82828
Fbln2	0.531	0.919	0	-1.85698
Igfbp6	0.156	0.694	3.1521e-229	-1.97841
Eln	0.361	0.656	6.51299e-114	-1.99932
Pi16	0.509	0.805	3.4589e-151	-2.06105
Clec3b	0.319	0.719	5.295e-174	-2.07096
Gpx3	0.416	0.957	0	-2.27332
Col8a1	0.228	0.782	1.05755e-297	-2.60474
Dpep1	0.113	0.733	1.51915304783266e-319	-2.69081
Fn1	0.087	0.5	7.72466e-155	-2.76628
Smoc2	0.256	0.871	0	-2.79153

## Sheet: F-Cyc vs Rest
Gene	pct.1	pct.2	p_val_adj	Log2FoldChange
Timp1	0.945	0.495	0	3.0629
Stmn1	0.782	0.07	0	2.64972
H2afz	0.989	0.758	0	2.42889
Cenpa	0.625	0.033	0	2.23713
Cks2	0.685	0.069	0	2.09467
Ran	0.99	0.738	0	1.83684
2700094K13Rik	0.885	0.297	0	1.74447
Cdc20	0.463	0.013	0	1.71518
Ccnb2	0.619	0.012	0	1.70545
Ube2s	0.951	0.589	0	1.62402
Hmgn2	0.889	0.378	0	1.62196
Hmgb2	0.655	0.249	0	1.62172
Birc5	0.569	0.01	0	1.60936
Slc25a5	0.983	0.68	0	1.54952
2810417H13Rik	0.593	0.007	0	1.5395
Eno1	0.918	0.542	0	1.42398
Ldha	0.986	0.846	0	1.38473
Hnrnpa1	0.974	0.526	0	1.34846
Cdca8	0.497	0.013	0	1.33167
Cdca3	0.572	0.007	0	1.3093
Nme1	0.953	0.618	0	1.27804
Rbm3	0.984	0.744	0	1.26715
Lrrc59	0.917	0.43	0	1.26675
Cks1b	0.807	0.275	0	1.25056
Tpm4	0.987	0.846	0	1.24122
Ranbp1	0.981	0.698	0	1.23606
Eif5a	0.993	0.925	0	1.23329
Cenpf	0.411	0.008	0	1.18375
Erh	0.987	0.749	0	1.18317
Tpx2	0.45	0.007	0	1.18225
Hmmr	0.422	0.002	0	1.11945
Knstrn	0.509	0.01	0	1.09252
Ccna2	0.407	0.003	0	1.08672
Spc24	0.602	0.015	0	1.07855
Ccnb1	0.382	0.003	0	1.05569
Ppia	0.999	0.996	0	1.03989
Racgap1	0.458	0.011	0	1.02169
Mki67	0.425	0.003	0	0.955193
Tacc3	0.499	0.023	0	0.934823
Cenpm	0.559	0.012	0	0.897465
Tk1	0.411	0.007	0	0.89326
Kif20a	0.427	0.004	0	0.880129
Cdkn3	0.425	0.007	0	0.781628
Nuf2	0.368	0.003	0	0.719423
Malat1	0.991	1	0	-1.7356
Igfbp4	0.797	0.95	0	-1.77276
Sepp1	0.727	0.943	0	-1.83913
Dcn	0.999	0.995	0	-1.94705
Serping1	0.848	0.967	0	-1.97412
Htra3	0.708	0.922	0	-2.41042
Gsn	0.963	0.993	0	-3.45984
Pkm	0.976	0.823	1.67106835261593e-318	1.34999
Tpm2	0.876	0.357	1.4652912486488e-312	1.53437
Mif	0.917	0.675	0	1.35101
Hspd1	0.908	0.5	2.28296e-307	1.20258
Pgam1	0.964	0.654	6.35762e-302	1.17046
Gapdh	0.991	0.897	6.99912e-301	1.18922
Cfh	0.677	0.907	1.01268e-299	-2.01257
Cst3	0.993	0.997	2.15753e-297	-1.8607
Rps2	0.997	0.998	5.60756e-297	0.918941
Itm2b	0.991	0.997	3.86999e-296	-1.31451
Anp32b	0.974	0.687	7.3772e-290	1.09853
Lgals1	0.999	0.993	8.94226e-290	1.09577
Ddx39	0.797	0.173	7.35922e-289	1.03576
Pbk	0.316	0.001	1.39228e-288	0.917548
Tagln2	0.991	0.882	1.44505e-288	1.2486
Fam64a	0.316	0.001	1.77016e-288	0.896445
Ckap2l	0.356	0.005	2.9123e-288	0.719221
Ckap2	0.382	0.009	4.41693e-288	0.887501
Ube2c	0.335	0.003	7.54439e-283	1.08351
Hmgb3	0.568	0.055	1.58481e-281	0.796095
Cenpe	0.332	0.003	7.12588e-281	0.825746
Plk1	0.319	0.002	1.97571e-278	0.649573
Dpt	0.864	0.95	1.29401e-270	-1.42521
Steap1	0.397	0.012	1.0776e-269	0.587912
Mmp2	0.668	0.901	1.16987e-269	-1.59152
Gstm1	0.599	0.826	2.17984e-268	-2.22134
Kif23	0.307	0.002	2.37879e-268	0.650727
Tubb6	0.918	0.522	3.14064e-268	1.36821
Lmnb1	0.536	0.052	1.69488e-264	0.781958
Ltbp4	0.664	0.906	7.59503e-264	-1.40479
Smc2	0.52	0.074	9.65992e-261	1.0526
Kif2c	0.279	0.001	2.18449e-259	0.542626
Diaph3	0.362	0.009	1.17251e-257	0.562781
Fbln1	0.478	0.837	2.18092e-257	-2.105
Lum	0.948	0.978	4.10293e-255	-1.37545
Zbtb20	0.909	0.967	9.16395e-251	-1.18712
Cdk1	0.348	0.031	3.73857e-248	0.8727
Ogn	0.685	0.867	4.98025e-248	-1.76897
Hmgb1	0.993	0.91	4.61129e-247	1.04876
Clec3b	0.182	0.721	1.11308e-246	-2.98398
Rnase4	0.856	0.941	1.76437e-246	-1.3218
Hsp90aa1	0.986	0.81	1.05648e-244	1.12671
Kif22	0.319	0.006	2.50077e-243	0.627058
Lockd	0.484	0.055	4.24798e-242	0.933643
Eef1g	0.993	0.951	5.15268e-241	0.966293
Txn1	0.99	0.865	4.09677e-239	0.935946
Anln	0.353	0.012	1.36435e-238	0.655821
Mxd3	0.28	0.003	1.6067e-237	0.596797
Fkbp11	0.736	0.245	7.25041e-237	1.15734
Mad2l1	0.454	0.033	8.11255e-236	0.632529
Smc4	0.743	0.309	7.1105e-235	1.02564
Acta2	0.756	0.232	5.88731e-234	2.1508
H2afx	0.629	0.174	3.17822e-233	0.899579
Crispld2	0.489	0.807	8.40673e-233	-1.94341
Asf1b	0.32	0.007	8.81528e-233	0.561632
Pmf1	0.522	0.058	7.88596e-231	0.62014
Cenpw	0.427	0.027	8.83161e-231	0.591111
Calm1	0.999	0.943	3.93332e-228	0.873006
Rrm2	0.386	0.026	2.50195e-227	0.827205
Tpi1	0.947	0.63	2.447e-226	1.04908
Ckap4	0.94	0.558	8.35871e-221	1.04534
Nucks1	0.909	0.528	1.6546e-219	0.978193
Ybx1	1	0.972	3.11711e-217	0.755506
Prc1	0.287	0.008	3.64306e-217	0.810265
Cycs	0.944	0.529	4.7286e-216	1.00749
Dpep1	0.598	0.706	1.7953e-215	-2.01906
Cfl1	0.996	0.908	1.44653e-214	0.847916
Hn1l	0.524	0.072	5.18536e-212	0.508022
Top2a	0.273	0.008	7.90273e-211	1.1098
Actg1	0.996	0.985	7.78075e-209	1.1444
Ncl	0.967	0.736	1.04851e-208	0.985462
Slc16a3	0.555	0.128	4.11151e-208	1.03673
Cox5a	0.971	0.702	1.76329e-207	0.887019
Npm1	0.986	0.884	1.16233e-206	0.999067
Ypel3	0.506	0.807	1.81887e-203	-1.28811
Rrm1	0.553	0.098	2.11347e-203	0.738972
Entpd2	0.45	0.794	5.06252e-203	-1.5277
Tuba1c	0.593	0.119	1.52731e-202	0.791572
Fxyd1	0.675	0.863	2.12361e-202	-1.17321
Mgp	0.958	0.984	4.58887e-202	-1.6065
Tubb5	0.971	0.835	4.84388e-199	1.10355
Nid1	0.802	0.864	5.71563e-198	-1.16512
Fscn1	0.81	0.326	7.65952e-198	0.987982
Tyms	0.662	0.185	4.97368e-196	0.848969
Bcat1	0.555	0.09	3.9468e-195	0.657338
Serbp1	0.991	0.81	3.29187e-194	0.843377
Gpx7	0.93	0.627	3.69568e-194	0.973109
Timp2	0.935	0.969	3.82173e-194	-0.981309
Tuba1b	0.966	0.861	2.33306e-193	1.13203
Spp1	0.497	0.066	4.06825e-190	1.84735
Lrp1	0.809	0.871	6.93946e-189	-0.981703
Atp5b	0.993	0.886	2.29314e-185	0.886339
Spc25	0.263	0.008	4.23151e-185	0.654006
Aldh2	0.802	0.836	9.09516e-185	-1.15287
Gpx3	0.94	0.929	1.38237e-184	-1.46378
Vmp1	0.92	0.49	4.26951e-184	0.947
Psap	0.927	0.935	2.44823e-183	-1.04035
Lmna	0.987	0.82	6.52192e-183	0.915341
Acot7	0.733	0.21	1.90956e-182	0.634331
Rpsa	0.997	0.991	5.2556e-182	0.661168
Islr	0.343	0.713	1.02055e-181	-1.41709
Cygb	0.853	0.936	2.17818e-181	-1.20878
Cald1	0.99	0.859	1.46524e-178	0.908781
Cxcl5	0.336	0.034	5.27169e-178	1.82937
Sparcl1	0.621	0.822	2.64243e-177	-1.61431
Dut	0.737	0.266	4.83953e-177	0.857466
Nt5dc2	0.566	0.112	2.48352e-176	0.553006
Prdx1	0.997	0.97	2.68037e-175	0.760667
Clic1	0.986	0.819	3.88968e-175	0.859266
Rangap1	0.55	0.114	1.04189e-173	0.633728
Pabpc1	0.994	0.816	1.89852e-173	0.802227
Angptl4	0.583	0.164	3.52455e-172	1.09904
Haus7	0.55	0.107	1.10931e-171	0.556112
Anp32e	0.759	0.251	1.24275e-171	0.696985
Rps18	0.999	0.999	1.85886e-171	0.683022
mt-Nd2	0.968	0.979	2.9255e-171	-0.907313
Snrpa1	0.782	0.258	2.944e-171	0.704596
Manf	0.976	0.783	9.46824e-171	0.983321
Apoe	0.501	0.726	1.95827e-169	-3.36624
Hnrnpa2b1	0.989	0.809	3.97118e-169	0.80239
Gsto1	0.622	0.16	5.8681e-169	0.684094
Tcp1	0.925	0.516	1.52627e-168	0.826786
Cd302	0.746	0.778	4.46521e-168	-0.916124
Snrpd1	0.886	0.464	4.19292e-166	0.831085
Cdk4	0.907	0.555	8.76479e-166	0.848333
Ppa1	0.833	0.345	1.8143e-165	0.876121
Serp1	0.96	0.663	2.07875e-165	0.884187
Hspe1	0.97	0.783	9.19445e-165	0.836185
Hdgf	0.954	0.603	2.00704e-164	0.800601
Itga5	0.661	0.206	3.72572e-164	0.817638
Hint1	0.99	0.889	6.23606e-164	0.707778
Cct7	0.943	0.561	1.13802e-162	0.834755
Cpq	0.491	0.755	1.86639e-162	-1.19306
Hnrnpab	0.928	0.568	3.65054e-162	0.843062
Tnc	0.556	0.111	1.00181e-161	1.03806
Sec61b	0.977	0.847	1.98312e-161	0.830869
Ssr2	0.971	0.745	2.4141e-161	0.828901
Tubb4b	0.875	0.532	1.60811e-159	1.02469
Nop58	0.747	0.267	8.11963e-159	0.750312
Gas1	0.635	0.846	4.21463e-157	-1.50489
Eif2s1	0.843	0.37	8.62989e-157	0.79039
Abca8a	0.372	0.696	5.12528e-156	-1.40417
Nudt21	0.845	0.346	1.38752e-155	0.710083
Jund	0.908	0.954	2.00609e-155	-1.38182
Fam162a	0.848	0.505	3.77688e-155	0.779468
Psma4	0.971	0.697	7.64717e-155	0.78692
Kpnb1	0.784	0.286	1.65169e-154	0.677794
Pi16	0.522	0.801	9.58435e-153	-2.28353
Eef1e1	0.591	0.154	1.02261e-152	0.556211
Tomm20	0.97	0.678	1.30389e-152	0.778967
Hmgn1	0.991	0.87	1.7879e-152	0.73262
Tprgl	0.73	0.761	1.82571e-152	-0.754334
Ctps	0.576	0.14	1.26155e-150	0.545017
Pbdc1	0.767	0.289	1.55531e-150	0.513028
Timp3	0.45	0.757	3.19537e-150	-1.67841
Set	0.953	0.63	3.90984e-150	0.80446
Dctpp1	0.667	0.208	6.34355e-150	0.632172
Srsf7	0.911	0.489	9.88983e-149	0.804628
Actn1	0.825	0.328	8.74353e-148	0.771649
Prelp	0.562	0.837	1.88706e-146	-1.24899
Btf3	0.994	0.944	7.0965e-146	0.651282
Ubl4a	0.761	0.282	8.83076e-146	0.546711
Vdac1	0.928	0.516	1.48892e-145	0.733924
Nasp	0.591	0.156	3.66022e-145	0.547836
Nap1l1	0.957	0.661	4.1189e-145	0.785552
Ccl2	0.546	0.12	7.36774e-145	1.39982
Tnxb	0.227	0.582	7.53948e-145	-1.36796
Sdc1	0.651	0.247	1.42076e-143	0.826777
Rps6	0.999	0.997	5.4429e-143	0.620289
Nudcd2	0.843	0.391	6.04161e-143	0.751062
Eif4a1	0.986	0.892	6.82968e-142	0.788477
Lamp2	0.797	0.795	1.01534e-141	-0.686122
Cct3	0.897	0.49	2.63892e-141	0.776778
Cct8	0.924	0.559	4.47906e-141	0.787847
Mdh2	0.948	0.699	5.32388e-141	0.769896
Lamc1	0.757	0.796	5.84606e-141	-0.874888
Mxra8	0.874	0.869	6.52406e-141	-0.734806
Ramp2	0.563	0.637	7.14489e-141	-0.955224
Rps27rt	0.805	0.717	2.80897e-140	-0.614345
Lsm5	0.802	0.34	3.20021e-140	0.614856
Anxa2	0.993	0.925	5.29157e-140	0.803648
mt-Co1	0.994	1	6.5505e-140	-0.542995
Ecm1	0.77	0.795	6.80842e-140	-0.983997
Tmem97	0.674	0.217	1.88583e-139	0.664939
Fcgrt	0.694	0.785	5.02498e-139	-0.845596
H2afv	0.908	0.711	7.84351e-139	0.710671
Snrpa	0.761	0.298	2.20301e-138	0.508826
Camk2n1	0.341	0.632	4.96206e-138	-1.29649
Ostc	0.967	0.811	1.92197e-137	0.746937
Tmed2	0.993	0.921	8.5631e-137	0.645384
Rplp0	0.999	0.999	1.10141e-136	0.601361
Ywhae	0.991	0.869	2.86144e-136	0.671569
mt-Nd3	0.832	0.799	3.5353e-136	-0.646781
Tmpo	0.647	0.274	1.40592e-135	0.709942
Psmd14	0.797	0.329	3.31353e-135	0.541735
Ccdc80	0.976	0.975	5.86125e-135	-1.09375
Eln	0.326	0.655	8.95017e-135	-2.42838
Srsf3	0.974	0.759	1.85478e-134	0.780975
Ccdc34	0.761	0.36	2.02797e-134	0.709027
Gas6	0.407	0.698	3.54832e-134	-1.50478
Actr3	0.938	0.601	5.36612e-134	0.773241
Klf9	0.647	0.717	6.7763e-134	-0.952739
Igfbp6	0.44	0.677	4.62649e-133	-1.66028
Sae1	0.819	0.357	5.26501e-133	0.584385
Rpl3	1	0.997	3.90623e-132	0.636062
Klf4	0.529	0.735	3.96773e-132	-1.6827
Prelid1	0.947	0.622	4.23086e-132	0.73552
Lman1	0.912	0.598	5.96684e-132	0.796113
Lsm2	0.772	0.327	1.05707e-131	0.590455
Rps3	0.997	0.996	5.39188e-131	0.566336
Hnrnpf	0.977	0.784	8.44322e-131	0.72875
Rpl29	0.997	0.976	3.75883e-130	0.604052
Etf1	0.776	0.322	4.5579e-130	0.624263
Smpdl3a	0.17	0.503	5.41131e-130	-1.01268
Nhp2	0.799	0.383	6.09805e-130	0.719396
Ccl9	0.345	0.042	6.77655e-130	0.801794
Use1	0.81	0.737	1.25532e-129	-0.51223
Prmt1	0.839	0.41	2.67793e-129	0.742746
Ms4a4d	0.635	0.602	7.75473e-129	-0.772185
G3bp1	0.927	0.563	2.00717e-128	0.742576
Hnrnpc	0.947	0.586	6.31384e-128	0.706938
Npm3	0.841	0.397	2.96852e-127	0.68522
Gspt1	0.83	0.378	4.55827e-127	0.632866
Sptbn1	0.888	0.899	5.27413e-127	-0.774449
Dazap1	0.842	0.396	6.07628e-127	0.660949
Syncrip	0.816	0.363	8.26415e-127	0.554624
Nop56	0.731	0.304	1.9584e-126	0.732842
Nav1	0.522	0.626	2.56065e-126	-0.813773
Dtymk	0.797	0.348	4.72975e-126	0.602561
Atp5f1	0.978	0.783	5.35417e-126	0.664012
Eny2	0.889	0.471	8.97842e-126	0.691335
Rarres2	0.851	0.899	1.21998e-125	-1.08844
Morf4l2	0.967	0.803	1.45238e-125	0.68845
Pcsk6	0.302	0.606	2.10572e-125	-1.29469
Strap	0.897	0.465	3.45848e-125	0.642655
Ass1	0.496	0.123	5.2658e-125	0.762639
Rps27l	0.996	0.881	7.09292e-125	0.741239
Ap1s1	0.81	0.357	1.46453e-124	0.580564
Tmed9	0.986	0.886	2.43244e-124	0.674969
Cd34	0.805	0.916	6.07872e-124	-1.1115
Eif6	0.878	0.484	1.30276e-122	0.708778
C1qbp	0.83	0.419	3.41559e-122	0.683788
Bzw1	0.928	0.55	4.06969e-122	0.682748
Naca	0.996	0.973	5.67486e-122	0.531851
Il11ra1	0.784	0.775	8.87336e-122	-0.82866
Esd	0.941	0.675	1.2031e-121	0.72096
Ahnak	0.862	0.863	1.53796e-121	-0.757402
Dnajc9	0.526	0.151	1.68426e-121	0.549523
Swi5	0.987	0.875	1.73777e-121	0.624926
Mlec	0.832	0.397	3.11148e-121	0.649362
Cct2	0.905	0.509	4.1654e-121	0.669851
Plxdc2	0.652	0.714	6.1207e-121	-0.793925
Naa50	0.809	0.363	8.10973e-121	0.57224
Nans	0.78	0.333	9.18207e-121	0.549429
Lsm4	0.95	0.588	1.07873e-120	0.670471
Map1lc3a	0.734	0.741	2.36767e-120	-0.604954
Banf1	0.901	0.486	2.80186e-120	0.629831
Dynll1	0.996	0.981	5.45915e-120	0.69244
Ssrp1	0.843	0.425	1.1488e-119	0.655669
Lsm6	0.859	0.419	1.42984e-119	0.608236
Tceb1	0.931	0.568	6.30885e-119	0.661463
Tpm3	0.968	0.686	9.50396e-119	0.691138
Selenbp1	0.32	0.578	9.63203e-119	-1.28732
Rhoj	0.838	0.808	9.76959e-119	-0.711944
Rpl32	0.999	0.997	9.88588e-119	0.551421
Mt2	0.737	0.359	1.38528e-118	1.37217
Msn	0.944	0.589	1.41796e-118	0.713767
Glul	0.402	0.504	1.58955e-118	-0.923548
Plp2	0.876	0.449	1.66315e-118	0.644937
Hnrnpk	0.99	0.893	3.44733e-118	0.613118
Rnf26	0.649	0.246	4.10458e-118	0.503193
Lama2	0.44	0.641	5.83734e-118	-0.90909
Eif4a2	0.859	0.805	6.53086e-118	-0.558493
Lyar	0.716	0.284	1.07025e-117	0.549859
Ahnak2	0.53	0.666	8.31269e-117	-0.848805
Col6a1	0.855	0.922	3.10152e-116	-0.731204
Itgb5	0.68	0.68	3.11835e-116	-0.685414
Fhl2	0.717	0.286	3.74885e-116	0.567178
Rsrp1	0.947	0.943	5.56214e-116	-0.741853
Fkbp10	0.853	0.459	8.23593e-116	0.724794
Lpl	0.736	0.778	1.23848e-115	-1.31579
Aldh1a2	0.691	0.274	1.72116e-115	0.986013
Mfap4	0.659	0.612	2.04789e-115	-1.38531
Myl12a	0.997	0.966	3.1113e-115	0.584412
Ssr3	0.934	0.643	4.38384e-115	0.701311
Eif4e	0.818	0.393	1.00609e-114	0.603018
Odc1	0.76	0.34	1.60791e-114	0.645533
Fxyd6	0.589	0.738	2.97582e-114	-1.23383
Smoc2	0.825	0.84	3.37759e-113	-1.32177
Pdap1	0.953	0.639	4.69574e-113	0.67435
Fubp1	0.866	0.447	5.09012e-113	0.564208
Gpc6	0.612	0.584	5.65545e-113	-0.551933
Pa2g4	0.792	0.368	7.25052e-113	0.615394
Ube2n	0.914	0.558	1.29632e-112	0.670928
Galk1	0.716	0.292	1.89629e-112	0.577044
Loxl2	0.874	0.489	2.60549e-112	0.767732
Hnrnpu	0.901	0.507	3.50647e-112	0.616961
Loxl3	0.716	0.321	4.2161e-112	0.751037
Srsf2	0.971	0.753	5.93168e-112	0.724232
Wdr1	0.835	0.406	6.50603e-112	0.600096
Tnfrsf12a	0.813	0.385	6.8864e-112	0.7372
Myl6	0.994	0.96	7.7072e-112	0.631191
Pmp22	0.902	0.93	1.01904e-111	-0.824589
C1qtnf2	0.381	0.532	1.82136e-111	-0.782764
Hexa	0.7	0.653	2.62157e-111	-0.533593
Ube2l3	0.894	0.486	5.72725e-111	0.61375
Psmb4	0.95	0.665	7.53141e-111	0.658825
Tomm40	0.721	0.306	7.9916e-111	0.558556
Itm2a	0.417	0.581	9.98518e-111	-1.07833
Cacybp	0.82	0.404	1.46723e-110	0.586405
Serpinh1	0.994	0.982	1.71854e-110	0.729712
Ebna1bp2	0.805	0.387	1.73831e-110	0.506746
Snrpe	0.944	0.66	1.88325e-110	0.653965
Lig1	0.329	0.06	1.9394e-110	0.500125
Rpl36al	0.989	0.892	2.37016e-110	0.62823
Srm	0.769	0.397	3.73902e-110	0.757909
Psmd7	0.941	0.652	4.24115e-110	0.686221
Kdelr2	0.95	0.67	9.91123e-110	0.780498
Ubl3	0.491	0.546	7.05324e-109	-0.620093
Ecm2	0.257	0.544	8.06197e-109	-0.992845
Nfix	0.743	0.703	5.19858e-108	-0.538831
Slc43a3	0.71	0.755	8.30379e-108	-0.945472
Atp5o	0.984	0.759	1.06601e-107	0.604829
Ctsd	0.904	0.841	1.28142e-107	-0.762201
Bri3	0.846	0.801	1.62078e-107	-0.518739
Smg6	0.519	0.174	4.5132e-107	0.552465
Klf13	0.516	0.619	6.35749e-107	-0.725321
Psmd2	0.856	0.455	2.12049e-106	0.622241
Psma3	0.976	0.788	3.58285e-106	0.631723
Celf2	0.685	0.698	4.15137e-106	-0.636071
Txnl1	0.898	0.509	7.26697e-106	0.612899
Rps27a	0.999	0.999	1.03629e-105	0.517591
Psmc6	0.861	0.454	1.08714e-105	0.500207
Tpm1	0.927	0.64	4.64013e-105	0.737628
Gars	0.759	0.344	6.0607e-105	0.582216
Pnrc1	0.721	0.765	6.63774e-105	-0.739118
Snx18	0.499	0.496	1.66419e-104	-0.505902
Surf4	0.902	0.544	2.47917e-104	0.650224
Hsp90b1	0.984	0.915	3.53655e-104	0.78465
Ddah2	0.802	0.829	3.90781e-104	-0.653057
Tspan4	0.822	0.435	5.40119e-104	0.758604
Hspa9	0.807	0.424	7.19769e-104	0.64203
Rpl4	1	0.995	8.29424e-104	0.52351
Plpp3	0.672	0.764	9.48591e-104	-0.998482
Pdia6	0.983	0.865	1.07583e-103	0.75143
Rad21	0.596	0.256	1.37525e-103	0.50733
Pam	0.784	0.82	1.79077e-103	-0.844976
Gstt1	0.282	0.515	2.08594e-103	-0.913577
Hspg2	0.763	0.722	2.4087e-103	-0.561592
Cct5	0.943	0.672	2.47369e-103	0.669522
App	0.885	0.842	5.29203e-103	-0.530231
Arf4	0.987	0.9	6.83221e-103	0.584936
Nfib	0.774	0.765	7.95639e-103	-0.608895
Gabarapl1	0.455	0.483	9.00557e-103	-0.532231
Psmb7	0.904	0.519	9.7858e-103	0.57467
Psma7	0.976	0.831	2.18279e-102	0.617821
Dek	0.8	0.533	3.35705e-102	0.606149
Sfpq	0.901	0.534	4.10542e-102	0.600751
Gstm5	0.569	0.537	2.00362e-101	-0.552763
Ogt	0.557	0.614	3.2794e-101	-0.617473
Ace	0.412	0.639	6.13129e-101	-0.947073
Pcolce2	0.835	0.755	1.31823e-100	-0.709858
Smim14	0.859	0.827	1.52305e-100	-0.546582
Psmb2	0.963	0.721	1.63987e-100	0.619879
Atp1a2	0.159	0.457	2.87993e-100	-1.03136
Eif1ax	0.888	0.499	5.65378e-100	0.566942
Sat1	0.728	0.791	5.72549e-100	-0.841864
Prdx4	0.931	0.618	6.93894e-100	0.665865
Ppp1ca	0.98	0.802	1.03398e-99	0.566989
B2m	0.994	0.994	1.04337e-99	-0.597264
Slc1a5	0.608	0.559	1.07395e-99	-0.51998
Hspa5	0.986	0.92	1.56739e-99	0.881834
Zfp36l1	0.736	0.727	2.00869e-99	-0.653973
Ccl7	0.539	0.167	6.73977e-99	1.28854
Fbl	0.799	0.395	9.25526e-99	0.540643
H2-D1	0.937	0.929	1.0453e-98	-0.814585
Thra	0.47	0.581	1.87065e-98	-0.675279
Cp	0.506	0.655	2.04468e-98	-0.983455
Snrpf	0.94	0.611	2.14319e-98	0.585709
Adamts5	0.657	0.707	2.43951e-98	-1.07224
Klf3	0.483	0.491	3.51177e-98	-0.535549
Acp1	0.898	0.511	3.79566e-98	0.539407
Atp5g1	0.963	0.791	4.59488e-98	0.638984
Hnrnpdl	0.891	0.524	6.44023e-98	0.605798
Itm2c	0.897	0.848	6.60337e-98	-0.518822
Cox7a2	0.989	0.838	1.84217e-97	0.567427
Eif3c	0.928	0.566	2.99994e-97	0.53807
Fbln5	0.491	0.713	6.56569e-97	-1.10781
Ptma	0.999	0.997	7.25358e-97	0.566045
Idh2	0.744	0.354	1.10274e-96	0.506462
Tubb3	0.457	0.121	1.12015e-96	0.639789
Aldh1a1	0.47	0.62	1.37985e-96	-1.01584
Vasp	0.774	0.382	2.52699e-96	0.540507
Psma6	0.897	0.52	4.38545e-96	0.564254
Serpine1	0.744	0.368	9.24487e-96	1.15729
Tnfsf12	0.478	0.494	9.87008e-96	-0.50568
Glipr2	0.875	0.492	1.25385e-95	0.604449
Klf2	0.659	0.814	1.29686e-95	-1.4258
Pid1	0.233	0.464	1.82482e-95	-0.880796
Egr1	0.807	0.805	2.06207e-95	-1.03002
Scn7a	0.257	0.481	2.54868e-95	-0.847647
C1ra	0.246	0.405	3.19095e-95	-0.764587
Cnn2	0.809	0.454	3.93621e-95	0.740041
Tsc22d3	0.447	0.627	5.26585e-95	-1.04946
Hnrnpa3	0.961	0.723	2.89564e-94	0.63507
Col6a2	0.799	0.844	3.09734e-94	-0.637749
Reep5	0.966	0.768	4.24636e-94	0.617648
Col14a1	0.572	0.522	5.14426e-94	-0.67764
Nfia	0.671	0.715	6.50452e-94	-0.703144
Heg1	0.681	0.621	9.42538e-94	-0.500119
Ddx39b	0.865	0.483	1.2147e-93	0.539193
Tmem167	0.968	0.726	2.11395e-93	0.588874
Mast4	0.477	0.5	2.11857e-93	-0.52502
Eif4ebp1	0.878	0.544	2.36532e-93	0.658025
Pdlim2	0.849	0.823	2.81412e-93	-0.606632
Eef1b2	0.987	0.892	9.34824e-93	0.592044
G0s2	0.399	0.646	1.11833e-92	-1.48311
Ptx3	0.351	0.098	1.21632e-92	1.05658
Eif4g2	0.968	0.729	2.23646e-92	0.579133
Atp5g2	0.966	0.776	3.69519e-92	0.58066
S100a4	0.641	0.263	5.02002e-92	0.657119
Dcun1d5	0.865	0.484	5.06785e-92	0.532105
Hcfc1r1	0.649	0.678	3.19766e-91	-0.587226
Mrpl18	0.864	0.495	3.81026e-91	0.545685
Rpl15	0.978	0.894	1.7739e-90	0.583393
Pdpn	0.767	0.44	2.48952e-90	0.594913
Ifngr1	0.754	0.72	4.12224e-90	-0.649007
Cd81	0.99	0.988	6.41632e-90	-0.587818
Inhba	0.404	0.176	6.75739e-90	0.599535
Abi3bp	0.243	0.542	1.06729e-89	-1.05534
Rps27	0.997	0.999	1.99419e-89	-0.575007
Lamb2	0.349	0.429	6.54121e-89	-0.537943
Mlf2	0.938	0.661	9.78357e-89	0.593197
Pdgfrl	0.424	0.489	1.18907e-88	-0.795224
Pink1	0.302	0.462	1.617e-88	-0.668697
Snrpd3	0.875	0.516	2.30777e-88	0.570482
Mrpl20	0.908	0.554	2.48275e-88	0.52685
Impdh2	0.878	0.526	4.82048e-88	0.540594
Prdx5	0.954	0.751	9.44577e-88	0.616139
Actb	0.997	0.994	1.09429e-87	0.738816
Vcp	0.963	0.738	1.9799e-87	0.579978
Ndrg2	0.601	0.591	2.28294e-87	-0.569848
Serpine2	0.728	0.813	3.59497e-87	-0.906974
Ube2i	0.911	0.577	1.11848e-86	0.557406
Man1a	0.293	0.374	1.19967e-86	-0.564357
Tcf4	0.905	0.896	1.36086e-86	-0.639767
Mrpl42	0.911	0.569	3.53015e-86	0.523912
Prnp	0.534	0.585	3.64539e-86	-0.595269
Phb2	0.911	0.597	5.33591e-86	0.560754
Cct4	0.922	0.631	1.26424e-85	0.590567
Crtc3	0.33	0.395	1.33551e-85	-0.508811
Zeb1	0.51	0.542	1.47863e-85	-0.557918
Srsf6	0.898	0.557	4.11557e-85	0.556929
Ddb1	0.852	0.486	4.34795e-85	0.50983
Rtn4	0.989	0.863	6.13637e-85	0.594198
Rabac1	0.943	0.939	6.13679e-85	-0.570665
Psmb3	0.938	0.718	2.0668e-84	0.601012
Vwa1	0.345	0.564	2.58856e-84	-0.984308
Gxylt2	0.361	0.471	2.94748e-84	-0.807119
Higd1a	0.892	0.606	3.12719e-84	0.552789
Eif3a	0.922	0.599	4.16058e-84	0.52552
Gsta3	0.152	0.44	7.29798e-84	-1.31368
Rpl10a	0.996	0.99	9.87754e-84	0.515019
Matn2	0.566	0.619	2.3839e-83	-0.643038
C1s1	0.184	0.388	5.30524e-83	-0.888637
4930523C07Rik	0.332	0.467	5.83511e-83	-0.631047
Scara5	0.078	0.347	6.6508e-83	-1.04548
Rora	0.513	0.541	2.46738e-82	-0.538075
Vdac2	0.921	0.63	2.7046e-82	0.571463
Ndufa4	0.984	0.857	8.45045e-82	0.52915
Ssr1	0.891	0.552	1.31923e-81	0.547742
Txnip	0.418	0.626	2.05809e-81	-0.880392
Tagln	0.582	0.224	2.06106e-81	0.769129
C3	0.279	0.486	2.42711e-81	-1.4082
Hsp90ab1	0.994	0.984	2.51802e-81	0.558264
Pla1a	0.504	0.474	4.03239e-81	-0.657654
Ifi205	0.313	0.355	4.69514e-81	-0.737074
Eps15	0.289	0.376	1.12148e-80	-0.504808
Rps29	1	0.998	1.13039e-80	-0.665008
Ctsl	0.974	0.968	1.55776e-80	-0.643381
Sec13	0.908	0.574	2.60416e-80	0.524582
Srp9	0.95	0.734	1.51712e-79	0.557107
Htra1	0.555	0.581	2.17929e-79	-0.683453
Psmb5	0.94	0.672	3.60415e-79	0.549872
Sar1a	0.963	0.72	6.98847e-79	0.545214
Mgst1	0.723	0.721	1.1704e-78	-0.718804
Atp5a1	0.983	0.813	2.48601e-78	0.525332
Thbs2	0.408	0.448	5.82729e-78	-0.689197
Csrp2	0.924	0.61	1.02613e-77	0.624873
Fosb	0.591	0.549	1.28578e-77	-0.66856
Mrpl17	0.875	0.529	2.45251e-77	0.502495
Slc29a1	0.703	0.656	2.98635e-77	-0.50716
C1qtnf7	0.366	0.532	4.1792e-77	-0.738615
Uqcrq	0.966	0.75	1.24965e-76	0.521149
Timm13	0.922	0.622	2.17788e-76	0.522665
Sulf2	0.332	0.431	3.56781e-76	-0.632261
P4hb	0.966	0.746	3.60573e-76	0.566267
Nbl1	0.565	0.62	3.95153e-76	-0.888288
Mcfd2	0.846	0.507	4.38454e-76	0.514518
Itgbl1	0.335	0.505	8.20766e-76	-0.89673
Hsd11b1	0.362	0.479	1.86344e-75	-1.36956
Mtch1	0.938	0.924	2.12829e-75	-0.510582
Jun	0.882	0.898	2.88699e-75	-1.24004
Mydgf	0.934	0.659	3.31055e-75	0.52853
Meg3	0.743	0.826	3.6678e-75	-1.00022
Junb	0.935	0.902	5.43712e-75	-1.10913
Podn	0.119	0.274	3.96071e-74	-0.64468
Btg2	0.632	0.642	1.16417e-73	-1.08252
Dusp1	0.598	0.711	1.21532e-73	-1.24363
Sh3bgrl3	0.961	0.751	3.76515e-73	0.5539
Mfap2	0.454	0.434	4.1898e-73	-0.508839
Ywhah	0.948	0.706	7.12128e-73	0.568443
Spon1	0.152	0.356	1.94873e-72	-0.789875
Fos	0.874	0.882	2.45689e-72	-1.18341
Snrpd2	0.954	0.71	3.79902e-72	0.501509
Tceal8	0.908	0.647	4.11001e-72	0.535978
Cd55	0.3	0.465	8.94168e-72	-0.843171
Igfbp7	0.997	0.994	1.44975e-71	-0.635815
Qpct	0.366	0.485	1.92361e-71	-0.693945
Eif5	0.945	0.693	4.66487e-71	0.538567
S100a11	0.994	0.975	1.08805e-70	0.505018
Prg4	0.509	0.197	2.16811e-70	0.615884
Fhl1	0.688	0.687	2.92261e-70	-0.547526
Gm12840	0.51	0.19	6.67734e-70	0.80784
Vim	1	0.995	3.58224e-69	0.51169
Ptn	0.453	0.332	3.64699e-69	-1.02561
Maged1	0.878	0.607	5.50123e-69	0.559131
Grina	0.328	0.42	9.83278e-69	-0.502747
Psma2	0.954	0.732	7.40381e-68	0.501427
Hspa8	0.994	0.975	1.24341e-67	0.605022
Spcs2	0.935	0.716	1.67445e-67	0.555811
Enpp2	0.108	0.353	9.76495e-67	-0.943679
Ier2	0.859	0.825	2.58107e-66	-1.04074
Crlf1	0.527	0.214	8.09094e-66	0.740468
Ar	0.195	0.31	1.61532e-65	-0.55595
Cyp27a1	0.08	0.285	3.13405e-65	-0.669558
Tbx20	0.43	0.498	8.59066e-65	-0.624322
Fmo2	0.068	0.283	1.84189e-64	-0.887153
Rcn1	0.912	0.678	1.93718e-64	0.534847
Ablim1	0.151	0.321	2.1442e-64	-0.625999
Zfp36	0.432	0.495	1.17978e-63	-0.907801
Tppp3	0.466	0.582	1.13177e-61	-0.997325
Cyb5a	0.95	0.94	1.98433e-61	-0.575684
Zfp385a	0.21	0.319	1.89949e-59	-0.597695
Tmem140	0.203	0.317	1.82089e-58	-0.500295
Ctsb	0.931	0.916	4.58425e-58	-0.71998
Ebf1	0.83	0.785	5.16262e-58	-0.540215
Socs3	0.555	0.496	5.91267e-57	-0.637512
Lims2	0.126	0.263	7.03318e-57	-0.559754
Fibin	0.69	0.67	1.05351e-56	-0.688831
Nupr1	0.826	0.806	1.27271e-56	-0.578835
Calm2	0.986	0.963	1.31164e-56	0.515507
Kdelr3	0.908	0.66	1.78178e-56	0.504836
Aspn	0.73	0.735	2.87453e-56	-0.848137
Anxa3	0.894	0.616	1.07432e-55	0.518776
Mdk	0.296	0.3	5.96215e-55	-0.52622
Sfrp1	0.589	0.66	1.72811e-53	-0.894035
Igf1	0.553	0.633	6.30528e-53	-0.748196
Gm2a	0.221	0.402	4.09397e-51	-0.561379
Osr1	0.217	0.271	2.32772e-50	-0.567724
Hes1	0.589	0.607	3.51395e-50	-0.574454
Serpinf1	0.941	0.921	1.45924e-49	-0.574994
Gem	0.276	0.355	1.47493e-49	-0.571653
Smtnl2	0.171	0.312	5.55776e-49	-0.504425
Il17d	0.089	0.26	8.5704e-49	-0.52724
Srpx	0.297	0.369	1.68235e-48	-0.604265
Tmem204	0.221	0.328	1.96795e-48	-0.511876
Lbp	0.188	0.285	4.88146e-48	-0.509828
Gpm6b	0.871	0.855	9.04487e-48	-0.530733
Cd9	0.902	0.853	2.18068e-47	-0.53583
Cdkn1c	0.129	0.3	1.46843e-46	-0.67238
Bmp4	0.161	0.286	6.2155e-46	-0.567043
Aldoa	0.944	0.899	8.39348e-46	0.532176
Hist1h2bc	0.733	0.534	5.18401e-45	0.529459
Calr	0.978	0.931	8.48196e-45	0.527567
Ly6a	0.761	0.638	4.70614e-43	-0.582779
Itih5	0.297	0.458	6.2695e-42	-0.662152
Mafb	0.145	0.308	8.26635e-42	-0.724515
Dkk3	0.177	0.305	4.26221e-40	-0.844417
Tgfbi	0.306	0.364	2.33944e-39	-0.637436
Fgl2	0.2	0.256	4.26768e-37	-0.612426
Trf	0.182	0.299	5.06837e-37	-0.704496
Spon2	0.289	0.414	1.57757e-35	-0.798731
Sfrp2	0.341	0.327	8.53509e-35	-1.32036
Fam101b	0.249	0.264	3.95472e-34	-0.636336
Crip1	0.978	0.986	1.09588e-33	-0.557366
Cxcl14	0.349	0.226	1.50869e-33	-0.615646
Adamtsl2	0.149	0.316	1.95376e-33	-0.693949
Wisp2	0.476	0.389	4.86766e-33	-0.645939
Mt1	0.849	0.666	2.4089e-32	0.618047
Pgf	0.18	0.312	5.14424e-32	-0.622838
Ly6c1	0.276	0.251	2.29668e-30	-0.522106
Hspa1a	0.296	0.312	2.28561e-29	-0.806309
Cd200	0.162	0.259	1.20022e-28	-0.562709
Cilp	0.348	0.339	2.76621e-22	-0.779042
Apod	0.17	0.251	1.42692e-19	-0.76067

## Sheet: F-IFNS vs Rest
Gene	pct.1	pct.2	p_val_adj	Log2FoldChange
Ifit3	0.937	0.155	0	3.62482
Ifit1	0.934	0.1	0	3.43612
Isg15	0.948	0.206	0	3.18789
Iigp1	0.805	0.095	1.65987e-302	2.56728
Rsad2	0.505	0.016	9.41996e-188	2.19545
Ifit3b	0.672	0.042	1.92288e-235	1.95172
Rtp4	0.892	0.196	8.7706e-223	1.88895
Irf7	0.815	0.149	4.5098e-193	1.87063
Usp18	0.732	0.073	1.0148e-232	1.80368
Ifi203	0.815	0.32	6.68463e-199	1.76547
Oasl2	0.829	0.178	2.41887e-213	1.66983
Bst2	0.923	0.588	2.1496e-151	1.62049
Phf11d	0.791	0.191	3.94323e-194	1.60675
Mndal	0.732	0.247	1.04596e-170	1.56425
Ly6e	0.976	0.827	7.49986e-154	1.54551
Gbp2	0.585	0.195	1.56671e-153	1.4787
Stat1	0.753	0.178	1.09663e-172	1.47078
Gbp7	0.707	0.157	8.53732e-167	1.46669
Igtp	0.596	0.08	1.02511e-161	1.37722
Ly6a	0.805	0.64	3.38968e-29	1.36757
Sp100	0.763	0.238	4.86376e-132	1.33892
Gm4951	0.578	0.048	1.23267e-152	1.33075
Trim30a	0.631	0.105	2.28272e-149	1.32892
Gbp3	0.638	0.106	3.77516e-139	1.2956
Xaf1	0.749	0.209	2.1558e-125	1.2723
Cmpk2	0.495	0.05	2.49327e-130	1.25202
Tor3a	0.742	0.234	2.34638e-134	1.24689
Ifit2	0.401	0.066	2.49998e-113	1.12333
Ifi47	0.397	0.026	4.068e-128	1.11703
Ifi35	0.767	0.319	1.2685e-93	1.11314
Ifi204	0.599	0.179	2.341e-74	1.10009
Psmb8	0.7	0.353	1.42907e-74	1.08605
Rnf213	0.575	0.099	2.6694e-108	1.07999
Eif2ak2	0.585	0.142	5.64721e-100	1.05796
Ifi27l2a	0.986	0.876	4.26205e-32	1.03985
Ifitm3	1	0.994	9.0214e-84	1.01367
Plscr2	0.477	0.108	2.81479e-77	0.999015
Ifih1	0.533	0.113	3.15041e-86	0.992398
H2-T22	0.725	0.42	4.43875e-81	0.982771
Parp14	0.467	0.083	2.90615e-79	0.976913
Ifi44	0.373	0.015	8.70546e-119	0.936465
Zbp1	0.432	0.071	2.12571e-76	0.929123
Sp110	0.502	0.128	2.15192e-72	0.91865
Mnda	0.624	0.256	3.26872e-49	0.899439
Samhd1	0.516	0.179	7.14624e-61	0.870215
Tap1	0.477	0.115	6.21639e-66	0.865244
Fam46a	0.655	0.35	5.67626e-35	0.845857
Oasl1	0.303	0.01	3.41285e-99	0.828354
Slfn8	0.432	0.041	2.69802e-89	0.82492
Lgals3bp	0.784	0.49	3.16594e-41	0.810339
Ube2l6	0.592	0.274	3.49163e-47	0.798412
Lgals9	0.638	0.315	3.31569e-45	0.795782
AW112010	0.345	0.216	4.66228e-27	0.793749
Aftph	0.46	0.134	1.5286e-56	0.793641
Herc6	0.411	0.074	9.88204e-70	0.792945
Irgm2	0.439	0.062	8.37701e-75	0.788193
Ddx58	0.509	0.124	2.0296e-56	0.777284
F830016B08Rik	0.338	0.013	1.90292e-94	0.761435
AI607873	0.429	0.144	8.83165e-32	0.759562
Slfn2	0.345	0.047	1.43373e-52	0.751456
Irgm1	0.387	0.061	1.08945e-65	0.746668
Samd9l	0.415	0.084	2.86163e-55	0.716459
Parp9	0.463	0.103	3.17617e-53	0.711974
Irf9	0.547	0.198	1.34622e-38	0.706065
Slfn5	0.547	0.222	3.7921e-32	0.690978
Dtx3l	0.415	0.082	3.64554e-52	0.686982
Ifi205	0.631	0.348	9.27722e-18	0.679141
Stat2	0.453	0.096	1.90771e-51	0.67643
H2-K1	0.875	0.778	2.17273e-21	0.670183
Trim12a	0.498	0.169	9.27839e-37	0.664391
Mitd1	0.484	0.168	4.54533e-36	0.66381
Psmb10	0.627	0.382	1.53785e-26	0.657518
Tor1aip1	0.756	0.483	1.05184e-28	0.636541
Col3a1	0.972	0.977	5.66916e-07	0.624067
Apol9a	0.317	0.028	5.6639e-67	0.610987
Col1a2	0.986	0.981	1.11224e-07	0.601652
Tor1aip2	0.551	0.305	4.19833e-27	0.596006
Col1a1	0.972	0.959	9.69e-07	0.594541
Trim25	0.376	0.082	1.51804e-39	0.592779
Sp140	0.376	0.113	5.24222e-32	0.591893
B2m	1	0.994	4.00251e-30	0.58398
Pnp	0.652	0.459	1.44138e-17	0.580998
Zc3hav1	0.463	0.216	6.99597e-22	0.576689
Ogfr	0.54	0.271	5.9456e-25	0.574558
Dhx58	0.348	0.044	5.95157e-54	0.570964
Apod	0.425	0.244	8.31151e-06	0.569406
Parp12	0.408	0.138	2.03599e-26	0.561857
Daxx	0.38	0.147	6.81113e-25	0.554206
Trafd1	0.474	0.214	3.08246e-21	0.549917
Socs1	0.324	0.146	9.1256e-18	0.545298
Clic4	0.697	0.54	5.87292e-20	0.541523
Isg20	0.404	0.167	2.88413e-20	0.523168
Psmb9	0.369	0.122	3.59995e-22	0.516611
Shisa5	0.875	0.77	2.40156e-20	0.515585
H2-Q4	0.376	0.145	6.00135e-16	0.511671
Nmi	0.401	0.191	2.29297e-17	0.507303

## Sheet: MAC vs Rest
Gene	pct.1	pct.2	p_val_adj	Log2FoldChange
Spp1	0.954	0.076	0	7.15644
Lyz2	0.993	0.041	0	6.92612
Lgals3	1	0.058	0	6.89699
Ctss	1	0.005	0	5.4488
Fabp5	0.927	0.219	0	5.21461
Fcer1g	1	0.009	0	5.17745
C1qb	0.848	0.005	5.2762489906402e-312	4.94613
Tyrobp	1	0.005	0	4.71102
Wfdc17	0.993	0.004	0	4.61559
Pf4	0.868	0.069	0	4.55887
Ccl6	0.94	0.003	0	4.40319
Cd68	0.993	0.012	0	4.29552
Ctsb	1	0.916	0	4.23016
C1qc	0.841	0.003	2.73929e-288	4.20688
C1qa	0.742	0.004	4.13927e-244	4.20306
Hmox1	0.967	0.192	0	4.18654
Lgmn	0.993	0.359	0	4.16695
Gpnmb	0.874	0.048	0	3.96304
Ctsd	1	0.842	0	3.83016
Ccl7	0.861	0.176	1.02573e-111	3.6783
Cd74	0.483	0.008	2.80779e-104	3.65495
Chil3	0.735	0.001	2.76174e-237	3.64818
Cotl1	0.993	0.253	0	3.64014
Cxcl2	0.583	0.011	8.43839e-134	3.61148
Ccl9	0.907	0.047	3.33216e-242	3.56426
Ftl1	1	1	0	3.49539
Rgs1	0.874	0.001	3.19028e-292	3.4297
Plin2	0.993	0.345	0	3.40417
Trem2	0.967	0.003	0	3.37452
Psap	1	0.934	0	3.32968
Cyba	1	0.753	0	3.27368
Ccl12	0.662	0.001	2.63714e-207	3.25425
Cstb	1	0.639	0	3.22182
Alox5ap	0.993	0.01	0	3.20628
Ms4a7	0.894	0.001	6.99847e-304	3.1964
Lilrb4a	0.987	0.001	0	3.18273
Ccl2	0.907	0.13	4.37687e-112	3.15376
Ctsc	0.954	0.026	2.88836e-305	3.11429
Ms4a6d	0.967	0.001	0	3.04347
Cd52	0.96	0.002	0	3.0168
Bcl2a1b	0.927	0.001	0	3.01127
Fcgr3	0.967	0.002	0	2.8687
Fth1	1	0.999	7.59576523916332e-320	2.86339
Cd53	0.987	0.001	0	2.85076
Arg1	0.53	0.001	2.85294e-158	2.80722
Ccl4	0.669	0	9.58112e-213	2.78416
Coro1a	0.954	0.003	0	2.7065
Srgn	0.927	0.023	6.66757e-257	2.63777
Ms4a6c	0.947	0.002	0	2.63683
Lcp1	0.954	0.001	0	2.62273
Capg	0.98	0.62	2.58711764045903e-316	2.58035
C5ar1	0.901	0.001	0	2.57699
Laptm5	0.987	0.002	0	2.567
Ctsh	0.987	0.295	0	2.54017
Grn	1	0.687	0	2.53789
Syngr1	0.848	0.001	1.52628e-281	2.53137
C3ar1	0.947	0.001	0	2.51794
Rgs2	0.887	0.045	3.55344e-188	2.47281
Tpd52	0.974	0.075	0	2.43692
Aif1	0.914	0.002	3.8855e-301	2.41047
Sh3bgrl3	1	0.758	0	2.39392
Cd14	0.868	0.022	2.34599e-246	2.37954
Mpeg1	0.934	0.002	1.29128009065777e-318	2.36022
Tmsb4x	1	0.995	3.77596e-230	2.3513
Spi1	0.954	0.001	0	2.34923
Gm10116	0.96	0.407	4.60972735113468e-312	2.3427
Lilr4b	0.927	0	0	2.31525
Lat2	0.927	0.001	8.98966411820219e-315	2.28498
Fcgr1	0.901	0	1.15159048904907e-311	2.27659
Ninj1	0.967	0.292	9.95062e-265	2.2298
Clec4d	0.854	0	4.37394e-287	2.21271
Gngt2	0.881	0.018	7.05742e-230	2.211
Ifi30	0.954	0.201	3.42588e-255	2.20568
Ctsz	1	0.823	3.1902214004486e-318	2.20275
Sdcbp	0.987	0.661	0	2.20266
Apoe	0.96	0.715	2.17503e-67	2.19552
Adam8	0.887	0.003	1.42761e-283	2.15678
Ccl3	0.689	0	1.9227e-220	2.12455
Pycard	0.96	0.216	1.60571e-248	2.11845
Aprt	0.974	0.433	1.18649e-274	2.10577
Plek	0.914	0.01	8.77381e-264	2.0843
Fyb	0.94	0.026	3.04414e-258	2.07065
Ctsa	0.94	0.431	3.21761e-250	2.05949
Msrb1	0.974	0.366	2.54325e-258	2.04237
Efhd2	0.94	0.263	1.3766e-226	2.0155
Ptpn18	0.94	0.01	3.18296e-272	1.99858
Mafb	0.967	0.295	4.68309e-115	1.98906
Cfp	0.788	0.009	1.717e-227	1.9646
Rnh1	0.987	0.644	1.48092e-219	1.95507
Itgb2	0.907	0.003	2.69136e-290	1.94436
Creg1	0.967	0.518	3.24059e-214	1.94211
Pkm	1	0.827	5.19893e-188	1.92186
Cndp2	0.934	0.348	6.66189e-195	1.89233
AF251705	0.874	0.001	3.05767e-291	1.88962
Cd36	0.715	0.002	2.33117e-225	1.87463
Dab2	0.841	0.223	7.32188e-168	1.86431
Arhgdib	0.967	0.313	8.46234e-138	1.85126
Metrnl	0.974	0.322	1.0135e-164	1.85095
Msr1	0.848	0	7.18917e-290	1.84894
Rac2	0.894	0.001	3.60698e-302	1.84479
Ucp2	0.914	0.039	1.49748e-216	1.83909
Hexa	0.987	0.652	4.08841e-182	1.83453
Calm1	1	0.945	5.28784e-186	1.81903
Gpx1	1	0.797	3.77096e-181	1.80349
Cd84	0.881	0	6.18541e-303	1.7966
Adgre1	0.801	0	1.60421e-264	1.7917
Cd48	0.861	0.001	1.91618e-286	1.78779
Tmem106a	0.914	0.092	5.09257e-182	1.76684
Ctsl	0.987	0.968	1.05455e-113	1.76435
Fam49b	0.907	0.105	5.23511e-193	1.73618
Eno1	0.967	0.554	8.59466e-125	1.70415
Arpc2	1	0.852	2.35522e-188	1.69076
Fxyd5	0.993	0.577	6.52441e-112	1.68154
Lst1	0.748	0.024	3.97223e-195	1.67216
Snx5	0.974	0.368	4.37575e-152	1.65372
Ostf1	1	0.624	2.44465e-188	1.63981
Clta	0.993	0.801	2.87998e-194	1.62184
Pla2g7	0.788	0.002	5.10071e-235	1.61823
Akr1a1	0.993	0.867	2.37829e-169	1.60904
Ms4a6b	0.722	0	1.50018e-230	1.60154
Sirpa	0.947	0.155	1.27264e-144	1.59837
Mmp12	0.331	0	3.41576e-98	1.57602
Uap1l1	0.881	0.202	1.10114e-114	1.57599
Fabp4	0.464	0.034	1.54378e-54	1.57535
Gapdh	0.987	0.9	1.91168e-139	1.57357
Cd93	0.808	0.003	8.20074e-234	1.563
Card19	0.921	0.306	6.53683e-130	1.54099
Pld4	0.781	0	3.80563e-255	1.52528
Fam96a	0.921	0.333	2.95041e-141	1.52382
Ehd4	0.821	0.14	8.28861e-115	1.5234
Prdx1	1	0.97	1.27983e-127	1.51791
Skap2	0.881	0.073	2.73335e-158	1.51581
Nrros	0.795	0.001	1.12695e-243	1.49996
Atp6v0b	0.98	0.642	5.42218e-140	1.49609
Bax	0.987	0.603	8.43437e-117	1.49356
Gusb	0.94	0.356	8.6289e-117	1.48526
Actb	1	0.994	2.64403e-82	1.48501
Stab1	0.775	0.004	1.28005e-219	1.48321
Atp6v1b2	0.914	0.205	8.09516e-121	1.47285
Ptpn6	0.775	0.001	3.57719e-245	1.47067
Nceh1	0.834	0.031	1.81467e-163	1.45978
Hilpda	0.603	0.195	1.08871e-107	1.45602
Tgfbi	0.868	0.357	1.56659e-44	1.45482
Atp6v1c1	0.894	0.217	1.17133e-110	1.45385
Atp6v1g1	0.993	0.832	1.43036e-144	1.4506
Slc3a2	0.974	0.443	8.48052e-103	1.4494
Csf2ra	0.848	0.057	1.29169e-144	1.4435
Csf1r	0.755	0.006	4.21731e-204	1.43816
Slc11a1	0.768	0.002	6.01849e-231	1.43792
Psmb8	0.954	0.354	3.72208e-85	1.43459
Irf8	0.907	0.165	3.43888e-94	1.43283
Vamp8	0.967	0.479	5.96289e-120	1.43101
Npc2	1	0.903	4.14728e-130	1.42747
Evi2a	0.815	0.024	2.40556e-170	1.42391
Arpc3	0.974	0.795	1.57265e-140	1.41984
Actr3	0.974	0.611	7.95915e-114	1.41756
Fcgr2b	0.748	0.001	2.25683e-232	1.41469
Slfn2	0.781	0.045	2.65945e-125	1.4138
Lipa	0.868	0.333	5.06532e-104	1.41005
Atp6v1a	0.874	0.22	2.64744e-106	1.40614
Adssl1	0.788	0.001	1.21619e-244	1.39978
Rab7b	0.901	0.272	9.71015e-95	1.39366
Pitpna	0.96	0.407	6.66563e-109	1.38983
Arpc5	0.993	0.701	1.41807e-122	1.38795
F13a1	0.57	0.002	2.60071e-155	1.38534
S100a4	0.887	0.273	2.43243e-56	1.38069
Tnfaip8l2	0.801	0.001	2.66865e-260	1.37739
Cfl1	1	0.91	1.24828e-122	1.35777
Pgam1	0.98	0.664	2.57027e-97	1.34321
Unc93b1	0.848	0.193	1.16144e-87	1.33912
Pirb	0.755	0.001	9.50938e-235	1.33794
Abhd12	0.874	0.2	1.57029e-93	1.31802
Cybb	0.675	0	1.97223e-211	1.31681
Lair1	0.788	0	1.44695e-263	1.30034
B2m	1	0.994	3.34128e-97	1.29306
Lrrc25	0.762	0	2.96398e-252	1.29138
Glrx	0.788	0.143	1.31913e-88	1.28934
Hcls1	0.781	0.001	1.32371e-247	1.28723
Cyth4	0.781	0	1.23947e-253	1.28672
Myo1f	0.728	0.001	1.32028e-229	1.27982
Psmb6	0.993	0.779	3.15199e-97	1.27827
Clic1	1	0.825	2.86301e-105	1.27021
Atp6v0e	0.987	0.833	2.25475e-115	1.2682
Lamp1	0.993	0.947	1.96551e-97	1.2654
Lpxn	0.768	0.001	2.27363e-239	1.26003
Il10rb	0.927	0.266	7.40053e-80	1.25559
H2-D1	1	0.929	2.74524e-65	1.249
Tm6sf1	0.755	0.003	6.58764e-208	1.24624
Ccr5	0.662	0.001	1.90423e-204	1.2455
Vsir	0.828	0.1	4.54046e-102	1.24308
Capzb	0.993	0.735	1.78159e-105	1.2417
Dok2	0.636	0.001	3.10254e-193	1.2359
Hexb	0.901	0.555	7.18994e-66	1.23487
Irf5	0.821	0.061	6.7633e-118	1.22963
Cebpa	0.709	0.086	2.7695e-80	1.22788
Slc25a5	0.993	0.69	1.45515e-71	1.22625
F7	0.536	0	1.2515e-169	1.22516
P2ry6	0.781	0.019	2.39995e-157	1.21674
Taldo1	0.96	0.562	1.0733e-77	1.21453
Ncf2	0.762	0.002	1.274e-221	1.20527
Slc9a3r1	0.742	0.036	1.68968e-119	1.20077
Hacd4	0.755	0.087	2.92164e-100	1.19917
Ndufb8	0.987	0.693	1.33145e-89	1.19745
Amdhd2	0.781	0.097	9.76948e-94	1.19568
Fam105a	0.709	0.004	6.0913e-190	1.19098
Ccr1	0.603	0	8.06032e-192	1.18822
Atp6v0d1	0.927	0.403	3.58446e-75	1.18682
Ms4a4c	0.338	0	2.12402e-101	1.18116
Gltp	0.881	0.379	5.19833e-69	1.17735
Tnfaip8	0.815	0.169	1.52432e-72	1.1772
Litaf	0.94	0.514	8.12017e-69	1.17414
Pkib	0.689	0.001	5.31217e-212	1.16759
Tpi1	0.974	0.64	5.42023e-62	1.16742
Selplg	0.695	0.002	6.86646e-202	1.16298
Mpp1	0.868	0.257	7.43857e-66	1.16235
Plekho1	0.762	0.024	4.40715e-155	1.15775
Rgs10	0.894	0.395	5.90151e-61	1.15308
Pim1	0.781	0.209	1.42307e-49	1.15113
Snx2	0.881	0.362	7.01668e-67	1.15106
Cox5a	0.98	0.711	3.50892e-84	1.14976
AB124611	0.689	0	6.54617e-220	1.14434
Arpc1b	1	0.964	2.67849e-100	1.13604
Glipr1	0.675	0.044	5.79983e-94	1.13543
Rnf149	0.848	0.236	4.81904e-62	1.13385
Itgam	0.669	0	1.93011e-218	1.1298
Nme1	0.967	0.629	7.67453e-62	1.12864
Fuca2	0.768	0.04	5.36008e-135	1.12855
Ncf4	0.669	0.002	1.25575e-194	1.1282
Slc15a3	0.709	0.013	6.71052e-148	1.12819
Cyp4f18	0.543	0	1.1542e-171	1.1276
Slc37a2	0.675	0.006	2.75798e-169	1.12721
Cxcl16	0.841	0.373	1.21901e-47	1.1271
Slc6a6	0.841	0.163	7.22934e-72	1.12636
Esd	0.954	0.684	4.7597e-63	1.11655
Fcgr4	0.603	0	1.62623e-185	1.11507
Gng2	0.709	0.046	5.32665e-103	1.11458
Cd24a	0.536	0.002	2.52608e-148	1.11189
Cycs	0.96	0.542	4.10391e-57	1.11067
Clec4a3	0.596	0	1.06714e-187	1.10691
Fcrls	0.358	0.001	1.25498e-97	1.10182
Tmem37	0.682	0.006	3.60639e-166	1.09772
Slc48a1	0.834	0.4	5.61784e-52	1.09073
Arl6ip1	0.947	0.616	1.48089e-56	1.08778
Bri3	1	0.801	1.51502e-71	1.08713
Capza2	0.974	0.661	1.77234e-66	1.08449
Clec12a	0.609	0	9.25105e-195	1.08256
Atf3	0.854	0.21	5.93168e-60	1.0823
Grb2	0.854	0.281	9.4717e-60	1.07269
Sgk1	0.616	0.238	2.48203e-37	1.07166
Emb	0.636	0.018	1.20902e-114	1.06986
Tuba1c	0.755	0.133	1.75066e-65	1.06961
Acp5	0.49	0.041	7.3252e-86	1.06954
Sirpb1c	0.623	0	8.21085e-201	1.06737
Clec4n	0.291	0	2.75977e-85	1.06317
Lamtor1	0.94	0.566	5.11576e-60	1.05984
Cd300a	0.616	0	2.85679e-194	1.05907
Plac8	0.278	0.081	7.1943e-09	1.05786
Dnase2a	0.742	0.097	3.01066e-75	1.056
Hck	0.616	0.001	7.85277e-182	1.05448
Ptpn1	0.874	0.321	1.88006e-57	1.05306
Arl4c	0.728	0.068	3.0062e-88	1.05283
Dnajc15	0.848	0.246	7.55804e-62	1.05058
Abi3	0.636	0.001	6.23238e-185	1.05057
Mmp8	0.404	0.001	7.15225e-114	1.05024
Anxa4	0.868	0.38	2.04453e-53	1.04937
Cd44	0.735	0.136	1.37015e-62	1.0488
Hpgds	0.596	0.004	3.47595e-150	1.04797
Rab5c	0.934	0.499	1.67344e-55	1.04697
Ly86	0.55	0	2.98397e-170	1.04649
Ap2s1	0.94	0.583	3.74402e-63	1.04524
Cdkn1a	0.801	0.371	2.95623e-22	1.04301
Folr2	0.43	0.001	9.07211e-121	1.04052
Rab7	0.993	0.697	1.98214e-63	1.0398
Ptprc	0.623	0	7.27537e-197	1.0352
Rap1b	0.947	0.686	7.28761e-54	1.03462
Dpep2	0.675	0.001	1.87348e-204	1.03159
Atp6v1d	0.921	0.329	1.38343e-58	1.03099
Kcnn4	0.603	0.001	2.18038e-178	1.03023
Mif	0.947	0.683	4.80858e-39	1.02592
Ly6c2	0.285	0.003	9.80054e-72	1.0259
Arrb2	0.702	0.063	1.48981e-83	1.02146
Aldh3b1	0.695	0.066	1.16166e-81	1.02114
Arl11	0.656	0	2.93291e-210	1.02012
Mfsd1	0.788	0.187	1.79375e-58	1.01899
Renbp	0.735	0.069	1.99486e-88	1.0171
Iqgap1	0.94	0.553	1.92055e-45	1.01593
Fermt3	0.675	0.001	5.309e-201	1.01561
Mrc1	0.464	0	3.08785e-138	1.01344
Aldoa	0.98	0.9	4.82156e-50	1.01038
Rab20	0.642	0.03	9.35249e-107	1.00924
Ube2a	0.868	0.308	4.23113e-56	1.00662
Lrrfip1	0.801	0.216	6.18469e-59	1.00607
Cd300lf	0.57	0	3.32975e-177	1.00495
Ube2l3	0.927	0.499	1.03742e-51	0.998456
Gmfg	0.57	0.001	2.82366e-160	0.997457
AI662270	0.656	0.001	3.40724e-198	0.99709
Dhrs3	0.868	0.346	5.25664e-39	0.985386
Mthfs	0.642	0.077	4.67678e-67	0.977203
Arpc4	0.94	0.431	1.13487e-50	0.97651
Il7r	0.483	0	3.32183e-148	0.975125
Mkrn1	0.868	0.268	8.10161e-54	0.972234
Lyn	0.702	0.043	2.94492e-98	0.971924
Arhgap30	0.675	0	1.135e-213	0.97002
Blvrb	0.881	0.47	5.60951e-46	0.969175
Sec11c	0.887	0.357	3.3183e-46	0.968529
Tpm3	0.987	0.695	2.07293e-50	0.968096
Tbxas1	0.563	0.001	4.85285e-170	0.9659
Igsf6	0.589	0	2.48578e-191	0.965264
Apobec1	0.709	0.082	7.58796e-74	0.964245
Tpp1	0.834	0.288	6.0626e-46	0.962894
Rap2b	0.801	0.213	2.44543e-51	0.956984
Irf7	0.503	0.157	8.74001e-23	0.956629
Tbcb	0.947	0.561	2.65814e-48	0.955348
Prdx5	0.993	0.757	2.72134e-49	0.955178
Por	0.834	0.352	2.91062e-34	0.953186
Maf	0.616	0.022	1.81377e-102	0.951945
Rgcc	0.384	0.03	1.69459e-40	0.94865
1110008F13Rik	0.934	0.593	3.75472e-49	0.947411
Basp1	0.742	0.127	2.11702e-60	0.946865
Osm	0.45	0	1.06422e-137	0.945922
Gnpda1	0.695	0.067	8.07962e-80	0.945636
Clec4a2	0.444	0	9.97701e-136	0.935224
Blvra	0.808	0.189	8.77987e-56	0.93288
Cd37	0.603	0.003	2.49178e-159	0.930772
Trappc2l	0.894	0.429	9.35259e-43	0.930435
Gyg	0.735	0.185	7.46414e-49	0.927943
Prdx6	0.921	0.572	1.83451e-41	0.927858
AI413582	0.788	0.232	3.33567e-45	0.926297
H2afz	0.98	0.766	6.28373e-28	0.926293
Susd3	0.576	0.001	2.42121e-167	0.921448
Soat1	0.715	0.178	1.82551e-48	0.91824
Rnpep	0.815	0.241	7.35541e-46	0.914596
Nckap1l	0.629	0	4.13544e-194	0.91238
Vps29	0.96	0.586	1.67275e-44	0.907165
Ptafr	0.53	0	6.86504e-162	0.905127
Dgkz	0.616	0.062	4.75359e-69	0.899607
Actr2	0.914	0.387	3.99591e-43	0.896533
Cdc42	0.993	0.913	2.89423e-59	0.894514
Itga6	0.57	0.007	1.62966e-126	0.892438
Abracl	0.927	0.474	8.53743e-40	0.889793
Eif4a1	0.993	0.895	1.69968e-45	0.888227
M6pr	0.834	0.336	6.04381e-38	0.887283
Zeb2os	0.702	0.082	9.63392e-72	0.885931
Lamtor4	0.934	0.498	4.18399e-40	0.884785
Ldha	0.987	0.851	3.15112e-34	0.883765
Rab3il1	0.801	0.269	6.51927e-38	0.881795
Rnf128	0.497	0.001	9.53162e-144	0.875866
Psmd8	0.954	0.644	3.02349e-36	0.87548
Evl	0.629	0.097	1.30995e-52	0.870183
Ptpre	0.543	0.016	8.50503e-93	0.867854
Ccr2	0.311	0	3.03466e-91	0.866273
Gla	0.596	0.032	1.31492e-84	0.862888
Crlf2	0.815	0.231	5.71221e-48	0.862778
H3f3b	1	0.993	3.91855e-41	0.857698
Ier5	0.881	0.424	7.41962e-28	0.856477
Id2	0.848	0.467	7.61146e-19	0.854825
Rnf130	0.808	0.251	5.17842e-44	0.851942
Vav1	0.603	0	3.497e-189	0.850593
Hmox2	0.768	0.284	7.34067e-36	0.849552
Snx3	0.96	0.744	2.88142e-39	0.84785
Il1rn	0.397	0	3.26924e-121	0.846635
Ier3	0.828	0.397	9.80064e-23	0.844369
Rps27l	0.993	0.885	3.50108e-41	0.842156
Erp29	0.954	0.663	2.84675e-37	0.840924
Slamf7	0.47	0	3.19494e-146	0.839124
Napsa	0.351	0	4.64599e-106	0.838391
Atp6v1e1	0.94	0.491	7.65118e-37	0.836968
Cbr2	0.258	0.001	2.23278e-69	0.834071
Ccdc109b	0.781	0.234	6.46223e-41	0.829226
Ndufb7	0.96	0.65	4.42611e-35	0.828931
Necap2	0.815	0.313	5.2438e-35	0.822936
Tmem86a	0.629	0.096	1.84917e-51	0.822539
Tcirg1	0.636	0.07	5.94038e-65	0.822396
Samhd1	0.656	0.18	9.43486e-39	0.821371
Mcl1	0.934	0.461	7.85933e-35	0.820316
Hprt	0.861	0.385	1.91032e-32	0.818782
Gpr137b	0.616	0.117	2.89638e-44	0.817255
Bst1	0.517	0	1.10862e-155	0.816232
Glmp	0.887	0.513	2.25624e-30	0.815111
Pgd	0.748	0.239	3.42476e-36	0.812232
Plk2	0.45	0.089	1.32595e-28	0.809288
Zfand5	0.907	0.484	8.83964e-32	0.809137
Milr1	0.556	0.035	8.49292e-73	0.807125
Clec4a1	0.437	0.001	1.58646e-124	0.800184
Atp5g1	0.954	0.797	8.44459e-36	0.799028
Ifi204	0.583	0.183	1.11478e-25	0.794722
Tmem14c	0.927	0.613	1.11203e-32	0.794409
Pilra	0.417	0	2.84328e-123	0.790818
Cox5b	0.993	0.793	3.40697e-38	0.788348
Slc7a7	0.603	0.037	4.54007e-80	0.787808
Wdr1	0.868	0.42	1.25897e-29	0.786264
Rab32	0.543	0.053	1.88056e-58	0.786179
Lmo2	0.702	0.133	1.75285e-53	0.785836
Nubp1	0.728	0.179	1.22263e-43	0.783448
Gabarap	1	0.962	2.87143e-49	0.783125
Cd200r1	0.53	0.019	5.49095e-86	0.779188
Snx20	0.523	0.001	6.92676e-152	0.778492
Cyfip1	0.788	0.301	8.55874e-32	0.77683
H2-DMa	0.404	0.009	1.58756e-78	0.775627
Nrp2	0.629	0.079	3.79816e-58	0.774786
Atp6v1f	0.98	0.731	2.85377e-32	0.774051
Atpif1	0.974	0.721	1.20645e-31	0.773072
Shfm1	1	0.901	4.69505e-44	0.768681
Atp2b1	0.894	0.484	6.59065e-27	0.764777
H2-DMb1	0.404	0.007	5.06631e-78	0.761026
Nipsnap3b	0.768	0.238	2.83967e-37	0.760873
Vat1	0.881	0.554	1.3293e-22	0.759497
Hk3	0.55	0	8.61993e-171	0.756445
Cmtm7	0.848	0.433	2.60267e-25	0.755707
Sgpl1	0.682	0.142	2.5507e-44	0.755169
Pepd	0.709	0.208	1.04093e-34	0.752555
Prelid1	0.954	0.633	1.0653e-27	0.752041
Tmem189	0.662	0.136	5.35649e-43	0.750585
Hn1	0.974	0.658	8.50816e-27	0.750266
Dtnbp1	0.834	0.434	3.75998e-23	0.746365
Actg1	1	0.985	2.22451e-33	0.740446
Rcbtb2	0.669	0.214	1.69061e-29	0.740165
Ethe1	0.715	0.219	1.56709e-32	0.737935
Bin1	0.762	0.287	4.89863e-28	0.737879
Ncf1	0.503	0	4.28462e-151	0.736024
Reep5	0.954	0.775	6.20682e-29	0.73493
Cd180	0.49	0.001	3.30864e-138	0.733553
Eif4e	0.901	0.406	3.97731e-33	0.732825
Phf11b	0.331	0.025	2.18702e-45	0.731542
Ltb4r1	0.417	0.006	2.24677e-88	0.731198
Atp13a2	0.55	0.053	1.22338e-57	0.72994
Ap3s1	0.94	0.638	3.17102e-25	0.729805
Cmpk1	0.914	0.511	2.87105e-28	0.729704
Mtss1	0.543	0.017	2.55128e-92	0.726435
Atg3	0.828	0.371	1.22534e-26	0.724797
Rasgef1b	0.437	0.033	9.89303e-55	0.723761
Cln8	0.669	0.114	1.43562e-51	0.723106
Inpp5d	0.53	0.001	1.7067e-153	0.721038
Ddx39	0.669	0.195	5.0201e-30	0.720881
Psme2	0.914	0.606	9.43438e-23	0.719044
B4galt6	0.523	0.063	1.37956e-47	0.717688
Nxpe5	0.444	0	1.73036e-136	0.716308
Man2b1	0.636	0.178	1.7255e-30	0.71581
Lamtor5	0.934	0.659	3.7861e-27	0.71491
Naa50	0.828	0.377	1.15535e-26	0.714541
Msn	0.921	0.601	2.22894e-20	0.711808
Bcl2a1d	0.404	0.001	2.00809e-112	0.711101
Spg21	0.854	0.452	2.17809e-24	0.710885
Limd2	0.53	0.119	7.13236e-35	0.710829
Slc43a2	0.477	0.014	4.57264e-81	0.709948
F10	0.318	0	1.5659e-93	0.708321
Atp5f1	0.98	0.789	4.05374e-29	0.707813
Psmb5	0.947	0.681	2.90376e-24	0.706583
Ap2m1	0.967	0.726	2.4655e-24	0.705618
Tma7	0.98	0.749	4.13594e-28	0.704463
Rbx1	0.993	0.822	1.15258e-31	0.704351
Pomp	0.967	0.74	2.13265e-28	0.702113
Zbp1	0.45	0.074	1.83307e-30	0.701876
Casp1	0.503	0.013	7.56637e-89	0.701739
Pde4d	0.477	0.055	1.1791e-41	0.701375
Gpr65	0.437	0	9.0124e-136	0.701199
Cd72	0.325	0.002	6.47308e-78	0.700408
Rassf4	0.49	0.001	2.66599e-139	0.700155
Myo5a	0.57	0.103	1.73621e-39	0.697433
Rilpl2	0.589	0.24	2.38627e-28	0.697355
Asna1	0.762	0.256	1.9917e-32	0.697139
AI607873	0.636	0.144	1.45494e-40	0.696963
Rab11a	0.901	0.544	5.0548e-24	0.694999
Vdac2	0.921	0.639	1.63211e-22	0.691669
Vps26a	0.795	0.225	5.00044e-44	0.688945
Hpcal1	0.675	0.233	2.18698e-25	0.688336
Tmbim6	0.993	0.838	3.29469e-29	0.686643
Gnai2	0.98	0.877	3.0984e-32	0.685063
Stx7	0.874	0.359	1.56357e-33	0.685004
Osbpl8	0.576	0.079	1.63165e-48	0.683968
Baz1a	0.589	0.089	1.44988e-46	0.681432
Bst2	0.887	0.591	1.03507e-13	0.680569
Csf2rb	0.437	0.007	6.55885e-88	0.680293
Psen2	0.616	0.157	1.47165e-30	0.68029
Ccrl2	0.417	0.056	1.31857e-35	0.680217
Gpsm3	0.808	0.344	9.0326e-26	0.680152
Rab8b	0.662	0.148	1.33333e-40	0.676846
Ndufa12	0.921	0.592	4.89215e-22	0.676509
Cd38	0.417	0.019	2.94341e-58	0.675434
Ntpcr	0.603	0.141	9.8857e-34	0.675094
Arhgap25	0.483	0	1.1876e-146	0.674995
Coro1c	0.828	0.362	5.07223e-27	0.671374
Pira2	0.43	0	5.51145e-135	0.664508
Tomm20	0.934	0.688	6.88602e-20	0.664341
Lgals9	0.788	0.317	4.51469e-27	0.658738
Mthfsl	0.609	0.121	6.34123e-39	0.657761
Emilin2	0.636	0.159	1.6411e-37	0.657362
Psma6	0.887	0.533	1.29009e-19	0.656442
Taf10	0.894	0.458	4.64381e-25	0.656039
Gsto1	0.642	0.175	1.74892e-30	0.652587
Cyb5r4	0.656	0.212	7.24131e-27	0.652325
Dazap2	0.868	0.427	2.31806e-24	0.650647
Arhgap9	0.444	0	4.93814e-132	0.650352
Tlr13	0.457	0	8.16931e-137	0.650206
Ssu72	0.861	0.495	1.17025e-19	0.648356
Gm2a	0.788	0.39	5.2094e-20	0.647941
B430306N03Rik	0.457	0	1.76203e-141	0.647711
Gda	0.675	0.221	2.81389e-28	0.646341
Llph	0.861	0.431	1.1835e-24	0.644767
Fkbp2	0.921	0.614	2.14171e-18	0.643239
Txn1	0.993	0.869	3.64281e-21	0.641599
Tgm2	0.662	0.287	5.98757e-21	0.640832
Stxbp2	0.483	0.005	8.54759e-109	0.640637
Comtd1	0.603	0.123	2.79727e-37	0.639715
Bin2	0.444	0	3.59929e-132	0.637683
Hspa8	0.993	0.976	9.32675e-16	0.637423
Fam129b	0.616	0.21	1.21716e-22	0.637215
Vps35	0.841	0.415	7.18372e-22	0.635569
Capza1	0.795	0.32	6.1025e-27	0.634949
Fes	0.55	0.071	2.89106e-48	0.634245
Dcxr	0.563	0.093	1.18441e-41	0.632569
Sft2d1	0.695	0.192	4.75088e-35	0.631171
Slc7a8	0.47	0.003	3.52244e-114	0.630172
Pld3	0.781	0.4	4.26694e-19	0.629715
Cox6b1	0.987	0.863	1.13827e-26	0.629071
Epsti1	0.43	0.001	1.52471e-120	0.627935
Snx1	0.755	0.33	3.7794e-21	0.627371
Tuba4a	0.457	0.018	1.4164e-70	0.626294
Cd300ld	0.43	0	1.76256e-132	0.623391
Hsd17b12	0.742	0.277	8.23687e-26	0.621884
Mien1	0.894	0.49	1.38135e-21	0.619481
Il4ra	0.517	0.187	2.31681e-15	0.618097
Mrps18c	0.828	0.348	6.82188e-28	0.617305
Klf6	0.901	0.59	4.84585e-14	0.616361
Smpdl3a	0.874	0.486	2.86475e-18	0.615401
Gng5	0.993	0.904	2.17479e-23	0.615374
Atp1a1	0.808	0.373	8.95761e-22	0.615252
Cuedc2	0.834	0.401	2.00791e-22	0.614894
Cd300lb	0.404	0	9.90753e-124	0.614677
Commd4	0.808	0.314	2.2199e-29	0.614015
Atox1	0.987	0.798	1.30142e-19	0.6134
Tln1	0.781	0.491	6.49177e-14	0.612995
Ran	0.94	0.747	1.13403e-15	0.61161
Abcg1	0.464	0.016	2.40207e-73	0.611025
Mdm2	0.616	0.201	4.08655e-22	0.610788
Cdc42se2	0.662	0.201	2.62737e-28	0.609297
Ppp1ca	0.98	0.808	1.77597e-19	0.606711
Oas1a	0.384	0.024	2.13026e-47	0.602784
Psmb10	0.828	0.382	5.3186e-23	0.59979
Pstpip1	0.444	0.021	1.40314e-61	0.596685
P2rx4	0.775	0.346	1.08018e-20	0.594767
Nhp2	0.808	0.397	2.93794e-19	0.59432
Mrpl54	0.834	0.478	7.96689e-17	0.594309
Ptk2b	0.43	0.019	1.20323e-61	0.593622
Mdfic	0.788	0.304	9.72262e-29	0.59319
Kcnk13	0.464	0.003	7.21914e-121	0.592479
Ndufab1	0.874	0.592	1.23805e-14	0.59161
Psmb9	0.57	0.123	2.27134e-34	0.59138
Gch1	0.477	0.037	4.30062e-55	0.590783
Sub1	0.974	0.729	1.60693e-17	0.590394
Rtfdc1	0.715	0.287	1.61241e-21	0.588867
Frrs1	0.444	0.04	2.55904e-45	0.587774
Dock2	0.437	0	5.96609e-132	0.586985
Cox6a1	0.98	0.877	1.28854e-24	0.586449
Tmem120a	0.675	0.218	3.10091e-27	0.584226
Calm3	0.921	0.622	1.38573e-14	0.583537
Tnfrsf11a	0.404	0	8.03507e-122	0.58151
H2-K1	0.967	0.778	1.17975e-12	0.581249
Arhgdia	0.974	0.803	1.43653e-17	0.579414
Tnfrsf13b	0.404	0	1.86227e-123	0.578965
Gclm	0.57	0.272	1.70712e-20	0.57805
Snx8	0.497	0.078	9.39628e-36	0.577185
Alcam	0.457	0.033	1.56233e-55	0.575416
Bak1	0.616	0.224	3.19819e-19	0.575021
Galnt6	0.424	0	4.7509e-128	0.57476
Rgl1	0.57	0.151	2.97633e-27	0.574163
Sin3b	0.808	0.425	2.21081e-17	0.57374
Sdhb	0.967	0.628	1.97099e-20	0.573699
Cerk	0.53	0.098	1.38924e-36	0.571855
Btg1	0.887	0.59	7.75949e-13	0.571309
Casp8	0.583	0.112	1.36301e-38	0.570943
Ppp1r18	0.702	0.248	1.85869e-25	0.570931
Hnrnpa3	0.927	0.732	9.253e-13	0.57043
Pdlim4	0.43	0.023	1.19556e-58	0.570137
Gns	0.649	0.225	2.45325e-22	0.567366
Ndufs8	0.861	0.483	3.68199e-17	0.566878
Ap1b1	0.477	0.076	1.53761e-33	0.564881
Gdf15	0.252	0.014	8.39672e-29	0.563663
Psmb2	0.96	0.729	5.56262e-16	0.562212
Dnase1l1	0.57	0.133	1.37977e-31	0.56177
Faim	0.682	0.198	1.86128e-32	0.561515
Dusp1	0.914	0.704	1.20588e-07	0.560441
Neu1	0.642	0.166	7.6214e-35	0.560327
Chd7	0.411	0.026	1.37407e-50	0.558198
Fnip2	0.45	0.025	4.3335e-61	0.557845
Edem1	0.662	0.23	4.0769e-23	0.555783
Dera	0.596	0.111	1.48999e-41	0.555395
Cd63	0.954	0.981	7.75063e-12	0.555164
Gde1	0.728	0.374	1.24611e-13	0.554299
Gm6377	0.298	0.001	2.20537e-80	0.553389
Mrpl28	0.781	0.41	5.9847e-16	0.553177
Rala	0.821	0.463	2.55811e-15	0.552654
Cnih4	0.768	0.412	3.27108e-14	0.552417
Cd86	0.311	0	1.03815e-94	0.55039
Hmha1	0.344	0.011	2.14423e-53	0.54898
Tep1	0.404	0.055	1.11229e-30	0.547073
Etfb	0.894	0.536	1.41981e-17	0.545332
Hnrnpf	0.967	0.791	7.7171e-15	0.544076
Tubb6	0.894	0.535	1.45305e-15	0.543688
Gm5150	0.331	0	7.82964e-99	0.541745
Ly96	0.503	0.096	1.6916e-31	0.541653
Tmem160	0.894	0.548	1.75436e-15	0.541027
Trpv2	0.417	0.019	6.11536e-58	0.539587
Slc16a3	0.371	0.143	3.00646e-08	0.53864
Esyt1	0.583	0.192	6.33801e-20	0.538294
Mrps14	0.947	0.635	9.92603e-17	0.538208
Iqgap2	0.404	0.023	1.03285e-52	0.537653
Ell2	0.437	0.044	6.86676e-42	0.536886
Mpc1	0.894	0.665	5.42228e-11	0.5338
Ppt1	0.775	0.424	1.81155e-15	0.530071
Diaph1	0.589	0.201	1.32312e-19	0.529492
Snf8	0.854	0.434	8.0826e-21	0.529402
Plbd1	0.265	0.001	3.89365e-67	0.528001
Psmb3	0.96	0.725	4.84407e-14	0.527509
Taok3	0.656	0.262	5.66399e-19	0.526147
Ten1	0.728	0.262	8.00241e-28	0.523519
Csrnp1	0.397	0.07	6.55739e-24	0.523388
Furin	0.483	0.167	2.81038e-15	0.52055
Ndufb6	0.927	0.594	7.00003e-16	0.517382
Psme1	0.854	0.456	3.35706e-18	0.516776
Aurkaip1	0.887	0.55	2.46158e-16	0.514407
Was	0.417	0	4.49751e-127	0.513687
Cklf	0.503	0.077	1.13159e-39	0.513585
Gpi1	0.874	0.571	1.41832e-11	0.512555
Timm13	0.947	0.632	1.39213e-16	0.512035
Nipa2	0.589	0.166	2.46049e-26	0.510463
Dok3	0.391	0.003	5.71304e-92	0.510346
Rnf115	0.656	0.207	5.68505e-29	0.509831
Slc16a10	0.377	0.021	5.31635e-50	0.508047
Sdf2l1	0.629	0.248	2.08755e-17	0.507548
D1Ertd622e	0.444	0.043	1.90126e-44	0.506676
Pla2g15	0.497	0.091	1.10464e-32	0.506408
Bcl2l1	0.603	0.169	5.00521e-29	0.504652
Pnp	0.834	0.459	1.56825e-15	0.503612
Ezr	0.609	0.182	1.13123e-27	0.503554
Camk1	0.808	0.515	1.35812e-09	0.503541
Akirin1	0.662	0.264	3.30528e-19	0.503529
Ubash3b	0.417	0.064	1.24603e-28	0.503073
Rbm47	0.364	0.001	1.05089e-93	0.502662
Ubl4a	0.702	0.298	1.14595e-18	0.500418
Man1a	0.311	0.371	4.81292e-14	-0.501749
Prpf4b	0.298	0.406	4.51739e-11	-0.503911
Add1	0.311	0.435	5.96234e-14	-0.503996
Nudcd3	0.311	0.409	3.12839e-18	-0.50587
Tmbim1	0.318	0.446	1.56341e-07	-0.505917
Tubb2b	0.079	0.257	1.12814e-06	-0.506274
Smtn	0.026	0.261	1.03749e-10	-0.506561
Ssr3	0.695	0.654	9.2278e-26	-0.507515
Fads3	0.06	0.285	6.95989e-08	-0.507545
Abhd16a	0.305	0.417	1.13644e-12	-0.507745
Rps3a1	1	0.998	3.8156e-15	-0.509508
Esyt2	0.106	0.308	5e-09	-0.510032
Rps24	1	0.996	6.10124e-15	-0.510096
Nucb2	0.43	0.502	2.66341e-13	-0.511012
Bod1	0.126	0.324	1.01871e-15	-0.513472
Pla2g16	0.172	0.362	2.259e-06	-0.514475
Mettl9	0.444	0.526	1.50019e-16	-0.514773
Snai1	0.04	0.255	2.96891e-08	-0.515252
Zfp260	0.132	0.328	1.61946e-09	-0.516371
Fzd2	0.033	0.268	1.09686e-12	-0.518157
Rbbp7	0.437	0.514	7.18861e-16	-0.51841
P4hb	0.768	0.755	5.79812e-15	-0.518455
Afap1	0.026	0.271	2.08078e-10	-0.518835
Cd164	0.417	0.486	2.92503e-20	-0.519813
Nfat5	0.146	0.331	4.80872e-08	-0.520089
Tnrc6a	0.331	0.452	5.18536e-11	-0.520342
Mbtps1	0.152	0.352	3.96081e-08	-0.520458
Scrn1	0.04	0.29	6.52693e-10	-0.520695
Luzp1	0.325	0.444	1.17058e-10	-0.520912
Nmt2	0.119	0.326	2.01712e-07	-0.521257
Pcmtd1	0.272	0.413	9.97845e-11	-0.521737
Prrc2b	0.086	0.302	6.72104e-09	-0.522355
Ext2	0.232	0.396	1.59633e-11	-0.523667
Dnajb1	0.358	0.336	3.02448e-07	-0.523702
Kdelc2	0.086	0.32	6.70809e-08	-0.526722
Rsrp1	0.954	0.943	1e-09	-0.527118
Trps1	0.265	0.39	4.42112e-14	-0.527286
Arntl	0.033	0.266	1.22472e-11	-0.528074
Plekhf1	0.026	0.26	5.07269e-10	-0.528217
B230219D22Rik	0.358	0.476	1.63768e-11	-0.528635
Smim11	0.49	0.574	1.63296e-14	-0.5293
Arl2bp	0.258	0.431	3.31034e-09	-0.529626
Tfpi	0.113	0.322	1.87645e-10	-0.529641
Dcaf8	0.192	0.369	1.83138e-11	-0.530966
St6galnac6	0.126	0.319	6.80186e-13	-0.530992
Fam220a	0.384	0.491	2.10552e-12	-0.532256
Acadsb	0.132	0.321	5.00094e-12	-0.532521
Lman1	0.629	0.611	1.15394e-22	-0.532844
Hook3	0.212	0.388	3.27037e-11	-0.533413
Cldnd1	0.417	0.508	8.75e-17	-0.533622
Smo	0.02	0.27	9.50327e-14	-0.534501
Plscr3	0.199	0.376	2.51286e-15	-0.536235
Adam19	0.02	0.255	1.11508e-10	-0.536344
Chic2	0.649	0.667	2.06992e-18	-0.536377
Rps16	1	0.999	3.74935e-27	-0.536392
Foxo1	0.086	0.291	3.95482e-08	-0.536637
Impdh2	0.464	0.542	3.66135e-15	-0.536741
Creb3l1	0.146	0.332	2e-09	-0.537219
Ctsf	0.02	0.26	2.07848e-10	-0.537709
Ift27	0.278	0.451	3.82341e-10	-0.538219
Rplp2	1	0.995	3.39419e-19	-0.538362
Rpl35a	1	0.998	1.57444e-21	-0.53983
Ybx3	0.258	0.423	4.65781e-09	-0.540565
Tm7sf3	0.232	0.402	1.03477e-11	-0.54125
Nr2f6	0.099	0.342	7.44897e-09	-0.542436
Prdx4	0.576	0.631	1.01015e-10	-0.543304
Smco4	0.099	0.319	3.50518e-10	-0.543926
Glipr2	0.397	0.509	6.57508e-10	-0.544317
Tnrc6b	0.066	0.296	5e-09	-0.545029
Ext1	0.099	0.318	9.10927e-10	-0.546275
Hp1bp3	0.404	0.493	9.38257e-16	-0.546521
Selk	0.934	0.945	2.47605e-15	-0.546724
Lrp1	0.868	0.869	1.46261e-10	-0.54685
Syt11	0.06	0.292	2.77951e-09	-0.547185
Cys1	0.007	0.267	1.11664e-14	-0.547233
Ppp1r15a	0.417	0.437	1.09415e-08	-0.547648
Use1	0.702	0.74	6.89999e-14	-0.547675
Toporsos	0.132	0.335	2.80589e-10	-0.547965
P4ha2	0.066	0.283	8.7022e-09	-0.548292
Bace2	0.02	0.267	5.00565e-11	-0.548748
Pten	0.305	0.458	1.58267e-10	-0.549492
Cirbp	0.185	0.365	1.10332e-07	-0.549827
Bsg	0.907	0.929	1.13052e-14	-0.551181
Ralbp1	0.709	0.729	2.37861e-16	-0.551401
Jam2	0.02	0.265	9.31341e-13	-0.551953
Mrfap1	0.94	0.908	4.37391e-22	-0.55231
Mical2	0.033	0.271	1.67402e-10	-0.552408
Nedd9	0.033	0.275	1.28551e-13	-0.552493
Ash1l	0.258	0.429	2.27475e-09	-0.55343
Rpl4	0.993	0.995	2.36245e-19	-0.553679
Pdcd4	0.053	0.276	1.8263e-12	-0.553967
Kctd11	0.06	0.282	1.13474e-10	-0.554736
Armcx2	0.02	0.288	1.48882e-13	-0.554988
Snx7	0.152	0.353	1.21782e-13	-0.556037
mt-Co3	0.993	0.999	2.35106e-50	-0.556119
Cyb5r3	0.695	0.642	5.60065e-26	-0.556229
Ski	0.351	0.492	9.57456e-12	-0.556781
Klf3	0.424	0.491	8.12807e-13	-0.558546
Crtc3	0.212	0.394	5.92972e-08	-0.558689
Rbms2	0.258	0.443	6.73596e-11	-0.559
P4ha1	0.45	0.519	2.50208e-16	-0.559283
Tcaf1	0.02	0.288	1.03976e-14	-0.559328
Lrrk1	0.172	0.362	6.70376e-11	-0.559599
Phldb1	0.079	0.315	6.3054e-09	-0.559944
Fam102b	0.119	0.332	3.45232e-09	-0.560102
Gm8730	0.921	0.821	1.65353e-23	-0.560206
1110001J03Rik	0.278	0.448	1e-09	-0.560398
Il1r1	0	0.252	1.29059e-14	-0.562942
Fkbp14	0.02	0.299	7.48794e-14	-0.564038
Fkbp11	0.046	0.268	3.9317e-08	-0.56433
Dnajc10	0.285	0.421	3.86956e-18	-0.564877
Mesdc2	0.417	0.51	1.76049e-18	-0.564945
Vasn	0.007	0.277	9.23411e-15	-0.565122
Rnf10	0.523	0.573	5.387e-24	-0.565281
Zbtb4	0.073	0.302	1.07246e-11	-0.565351
Glg1	0.417	0.534	3.40175e-13	-0.566756
Tmem107	0.066	0.311	2.12558e-10	-0.568481
Ilk	0.623	0.667	2.95109e-18	-0.569453
Hivep2	0.033	0.274	1.79224e-11	-0.570267
Rplp0	1	0.999	1.56709e-18	-0.570899
Ergic3	0.728	0.729	1.7808e-22	-0.572509
Klc1	0.291	0.452	7.16868e-13	-0.57468
Rps5	1	0.999	5.81058e-31	-0.574729
Dtx3	0.099	0.32	2.87271e-10	-0.574776
Pgrmc1	0.424	0.537	3.95745e-16	-0.575181
Gnb2l1	0.993	0.965	1.71057e-17	-0.575318
Tmed1	0.252	0.432	1.93599e-13	-0.575708
Lpp	0.232	0.407	1.60412e-12	-0.576278
Lefty1	0.046	0.282	6.05562e-14	-0.576876
Cxx1a	0.179	0.365	4.10833e-18	-0.577661
Eri3	0.265	0.44	4.4925e-14	-0.577957
Smc6	0.55	0.619	2.74035e-14	-0.57851
Socs3	0.642	0.497	1.43257e-17	-0.578571
Sdf2	0.404	0.537	1.0407e-19	-0.581064
Rpl5	0.987	0.969	6.31098e-19	-0.581335
Golgb1	0.483	0.559	3.3185e-20	-0.581463
Unc5b	0.013	0.268	9.64414e-14	-0.581726
Rnd3	0.04	0.287	1.49371e-10	-0.583506
Tsc22d3	0.642	0.619	1.15677e-09	-0.583819
Sgcb	0.205	0.4	1.54526e-12	-0.583878
Nbeal1	0.212	0.406	8.17055e-11	-0.584899
Pja2	0.146	0.37	3.01021e-13	-0.585503
Nsg1	0.007	0.252	5.4603e-13	-0.587287
Arl3	0.371	0.527	4.41758e-13	-0.587956
Cnrip1	0.086	0.346	5.53332e-10	-0.58838
Aplp2	0.616	0.692	8.12885e-12	-0.590165
Krit1	0.311	0.462	2.83722e-15	-0.590494
Rgs3	0.113	0.323	2.21859e-09	-0.590827
Pcnp	0.424	0.568	1.7363e-12	-0.591045
Ank2	0.033	0.303	8.51133e-12	-0.592125
Kank2	0.013	0.29	2.32909e-16	-0.592206
Vezf1	0.152	0.347	5.09798e-13	-0.592562
Fus	0.821	0.831	7.80354e-18	-0.592896
Tpt1	1	0.999	4.10343e-25	-0.593059
Insig2	0.331	0.446	1.80965e-20	-0.593222
Clstn1	0.026	0.312	1.63729e-13	-0.594967
Gltscr2	0.755	0.746	6.74977e-22	-0.595996
Steap3	0.192	0.365	1.47836e-12	-0.596147
Fam195b	0.689	0.708	9.85874e-24	-0.597218
mt-Atp8	0.099	0.334	1.07753e-12	-0.597894
Imp3	0.331	0.496	4.65297e-12	-0.598961
Plekha6	0.013	0.257	1.38899e-13	-0.598987
Tns2	0	0.265	1.0395e-15	-0.600183
Myh10	0.033	0.307	1.51131e-12	-0.601348
Ccnd1	0.285	0.355	2.61284e-07	-0.601964
Synpo	0.04	0.284	1.32783e-11	-0.602015
Lrrc8a	0.106	0.313	5.70456e-10	-0.602828
Lima1	0.252	0.426	2.68227e-13	-0.602936
Qsox1	0.086	0.356	8.52244e-12	-0.603691
Arhgef12	0.053	0.319	1.441e-16	-0.605536
Xbp1	0.742	0.768	2.30242e-15	-0.605644
Wdr89	0.702	0.667	9.64981e-25	-0.606216
Ece1	0.106	0.324	8.74097e-11	-0.606346
Crtap	0.305	0.489	6.23379e-12	-0.608242
Hdgfrp3	0	0.295	2.20376e-18	-0.608247
Tgfbr3	0.007	0.262	9.27563e-14	-0.608826
Pcbp4	0.046	0.335	3.93968e-14	-0.610326
Trp53i13	0.166	0.399	4.1447e-14	-0.61103
Rpl28	1	0.989	1.3814e-22	-0.613347
Shisa4	0.013	0.288	4.99575e-17	-0.613426
Abhd8	0.066	0.32	1.9511e-16	-0.613845
Il17d	0.013	0.255	8.59906e-14	-0.614181
Rock2	0.192	0.397	4.65603e-13	-0.614367
Praf2	0.225	0.434	1.37862e-14	-0.615261
Serinc3	0.311	0.45	7.59505e-17	-0.615772
Csnk1a1	0.762	0.751	1.21138e-28	-0.617578
Rpl36	0.993	0.99	5.71601e-23	-0.61857
Arhgap5	0.086	0.341	6.71099e-15	-0.618576
Tmem9	0.119	0.373	5.08582e-13	-0.61905
Dnajc1	0.318	0.492	6.99577e-14	-0.62017
Pcdh9	0.007	0.273	2.6384e-14	-0.620613
P3h1	0.06	0.344	3.0193e-13	-0.620683
Zfp385a	0.199	0.316	2.34611e-13	-0.621489
Snrk	0.166	0.359	1.7e-08	-0.624053
Bmpr1a	0.02	0.328	4.00141e-16	-0.625031
Rpl22	0.987	0.969	2.12191e-23	-0.625082
Pnisr	0.47	0.59	2.77765e-14	-0.625422
Sulf2	0.305	0.428	1.04975e-10	-0.626166
1500009L16Rik	0.033	0.286	7.5476e-14	-0.626982
Arhgef25	0.033	0.329	3.06006e-16	-0.62778
Rgma	0.033	0.294	2.3978e-12	-0.628485
Fyn	0.172	0.38	1.22915e-15	-0.628922
Ube2e2	0.013	0.316	7.05483e-20	-0.629417
St3gal4	0.199	0.379	7.89518e-14	-0.631366
Skp1a	0.424	0.528	4.68069e-26	-0.631589
Stk25	0.086	0.355	7.5736e-13	-0.631742
Pros1	0.106	0.361	3.12437e-11	-0.631756
Polr2m	0.49	0.605	7.17139e-19	-0.632765
Pcdh19	0	0.282	2.9364e-17	-0.633563
Tcf21	0.013	0.282	4.12097e-14	-0.635082
Cuedc1	0.02	0.301	2.48842e-15	-0.636019
Trip10	0.126	0.35	5.66329e-12	-0.636682
Carhsp1	0.457	0.563	2.1686e-12	-0.637374
Mageh1	0.066	0.328	2.08777e-13	-0.637884
Tpm4	0.881	0.851	4.7639e-16	-0.638324
mt-Nd4l	0.219	0.43	1.77664e-12	-0.638886
Snx21	0.126	0.366	2.62262e-17	-0.639017
Laptm4b	0.066	0.334	5.17075e-14	-0.639307
Ost4	0.715	0.723	2.66594e-28	-0.640725
Eif3f	0.954	0.944	2.76004e-23	-0.641433
Foxp2	0.013	0.296	1.06185e-14	-0.641497
Ugp2	0.801	0.709	2.02007e-24	-0.64208
Ephx1	0.007	0.29	2.24638e-15	-0.642561
Grb10	0	0.3	7.2008e-19	-0.644501
Rpl12	0.974	0.974	3.28261e-17	-0.645544
Tns1	0.113	0.359	8.33103e-15	-0.645703
Gnb4	0.033	0.328	1.35412e-14	-0.645733
Sar1a	0.702	0.73	6.18196e-25	-0.645979
Tmem263	0.06	0.353	1.00012e-13	-0.647083
Rab18	0.623	0.711	7.88358e-21	-0.647852
Rpl37a	1	0.998	1.14902e-24	-0.647892
Rps28	0.993	0.995	2.54707e-23	-0.648394
Atxn7l3b	0.649	0.717	2.95038e-21	-0.650422
Trip6	0.026	0.33	5.75987e-19	-0.652778
Tnfaip6	0.06	0.282	1.45717e-10	-0.654305
Pmm1	0.132	0.38	6.95217e-18	-0.65546
Tgfbr2	0.344	0.496	2.44342e-15	-0.655981
Slc9a3r2	0.026	0.313	4.05729e-14	-0.656411
Wls	0.391	0.557	2.03428e-14	-0.656562
Gm10263	0.219	0.398	1.17243e-12	-0.658173
Adamts1	0.007	0.253	1.01958e-12	-0.65875
Nr3c1	0.351	0.505	1.25804e-17	-0.660113
Rps8	0.993	0.999	1.72644e-30	-0.66112
Yipf3	0.47	0.6	9.80244e-21	-0.661426
Casp12	0.007	0.313	6.93952e-18	-0.66149
Fat1	0.02	0.295	2.5279e-16	-0.66284
Rpl7a	1	0.985	2.23322e-32	-0.663377
Nckap1	0.007	0.333	5.86991e-20	-0.665045
Smim7	0.55	0.671	1.35275e-19	-0.6655
Ryk	0.026	0.34	6.06853e-18	-0.668671
Frmd6	0.033	0.321	1.51948e-15	-0.668946
Lbp	0.053	0.283	3.33149e-09	-0.670375
Hdlbp	0.556	0.638	2.11463e-22	-0.670579
Col4a4	0.02	0.273	4.4408e-12	-0.671192
Thbs3	0.02	0.334	4.11731e-17	-0.67208
Aldh2	0.881	0.834	6.15241e-16	-0.672182
Meis2	0.007	0.31	3.92405e-17	-0.673443
Tspan6	0.013	0.3	2.93437e-16	-0.673841
Actn1	0.212	0.35	5.36468e-12	-0.674711
Mmp14	0.523	0.597	2.11113e-12	-0.675249
Mbnl2	0.656	0.711	3.66374e-24	-0.676929
Sec31a	0.351	0.525	6.75329e-22	-0.677489
Klhdc2	0.212	0.452	2.44751e-16	-0.678189
Nrep	0.007	0.275	3.69741e-14	-0.67822
Acvrl1	0.291	0.486	4.16757e-13	-0.681346
Pxdn	0.02	0.323	8.0573e-19	-0.682724
Jam3	0.026	0.346	4.55999e-20	-0.682821
Plscr4	0.033	0.338	1.88616e-15	-0.683008
Rab23	0.026	0.328	1.19038e-18	-0.683098
Creb5	0.132	0.355	5.40293e-09	-0.683403
Auts2	0.026	0.321	1.44195e-17	-0.686108
Csf1	0.086	0.365	1.44963e-12	-0.686982
Adamts10	0.046	0.342	9.97226e-17	-0.687149
Lims2	0.007	0.26	3.64666e-13	-0.688221
Cdkn1c	0.06	0.295	1.52721e-08	-0.689152
Myadm	0.119	0.396	7.78266e-14	-0.689403
Sh3d19	0.046	0.353	1.19842e-16	-0.690614
Ccnd3	0.298	0.504	8.75244e-14	-0.693372
Fosb	0.563	0.55	6.86139e-13	-0.694637
Kcnq1ot1	0.298	0.488	1e-09	-0.694703
Glis2	0.013	0.327	9.57493e-21	-0.695042
Ift20	0.616	0.724	2.42187e-22	-0.696746
Dnpep	0.424	0.562	2.97126e-23	-0.696884
1110065P20Rik	0.166	0.432	3.53117e-18	-0.69751
Ckap4	0.483	0.575	3.57745e-21	-0.698475
Twsg1	0.086	0.378	1.45045e-14	-0.698553
Mpzl1	0.046	0.361	1.5028e-17	-0.698863
Ppp1r2	0.603	0.662	8.1908e-23	-0.701012
Tmem119	0.126	0.405	2.88434e-11	-0.701581
Tshz2	0.007	0.277	5.44332e-15	-0.701748
Pdzd2	0.007	0.275	1.15284e-14	-0.70259
Mn1	0	0.305	2.21435e-19	-0.703224
Klf7	0.305	0.508	1.51361e-13	-0.703829
Abhd14a	0.053	0.371	1.80021e-20	-0.704369
Sept8	0.232	0.462	4.03802e-14	-0.704485
Aes	0.709	0.774	1.36442e-16	-0.704875
Yipf5	0.397	0.557	2.73947e-23	-0.705478
Cyp27a1	0.04	0.279	8.5888e-14	-0.707028
Pttg1ip	0.503	0.612	8.56837e-27	-0.707598
Msc	0.026	0.266	9.40647e-12	-0.708294
Smtnl2	0.02	0.309	2.65556e-17	-0.708402
Atraid	0.675	0.74	2.27779e-26	-0.709481
Smarca2	0.132	0.414	9.61297e-16	-0.71054
Tceal8	0.503	0.66	1.51006e-19	-0.711958
Mat2a	0.662	0.699	3.3374e-18	-0.712279
Dnajb4	0.046	0.362	4.62486e-17	-0.71297
Rhbdf1	0.033	0.364	1.91576e-20	-0.713314
Yipf4	0.384	0.601	1.74821e-16	-0.713409
F3	0.02	0.256	6.83497e-11	-0.71371
Podn	0.02	0.27	1.21509e-11	-0.715284
Rpl23a-ps3	0.894	0.855	3.25778e-32	-0.715919
Igsf3	0.033	0.335	2.22792e-18	-0.716005
Pkd1	0.04	0.352	8.95549e-20	-0.718331
Palm	0.113	0.392	4.43258e-15	-0.720603
Vgll3	0.007	0.322	4.81679e-19	-0.721439
Tril	0.007	0.316	1.73369e-18	-0.722451
Slco3a1	0.013	0.316	2.45636e-17	-0.723404
Bet1l	0.278	0.503	5.06209e-20	-0.723519
Sept7	0.874	0.866	4.84257e-26	-0.724117
Nfe2l1	0.185	0.45	6.37702e-19	-0.724292
Ltbp1	0.007	0.315	1.45993e-17	-0.72618
Cnpy2	0.689	0.766	9.81048e-28	-0.726753
Cltb	0.464	0.6	3.32207e-22	-0.729802
Ckb	0.682	0.757	3.28157e-09	-0.730564
Rpl18a	1	1	9.29691e-50	-0.730928
Tmem159	0.265	0.489	3.90329e-18	-0.731404
Drap1	0.682	0.716	3.01445e-23	-0.732973
Sept2	0.51	0.651	1.80477e-22	-0.735289
Zfyve21	0.232	0.498	3.41099e-15	-0.735712
Ugdh	0.371	0.481	2.86131e-13	-0.736808
Cbx6	0.033	0.362	1.45122e-20	-0.7387
Ppfibp1	0.073	0.399	2.39447e-18	-0.740761
Scd2	0.093	0.399	5.80308e-14	-0.741994
Slc16a2	0.013	0.324	9.74415e-19	-0.742621
Rpl21	1	0.998	7.29971e-48	-0.742951
Rasl11b	0.026	0.313	6.71498e-14	-0.746345
Pnrc1	0.715	0.764	1.23137e-19	-0.747144
mt-Nd4	0.98	0.998	1.01544e-45	-0.747574
Wbp5	0.801	0.822	5.88815e-28	-0.749094
Smim14	0.735	0.829	8.2405e-21	-0.749792
Rbfox2	0.02	0.391	3.49341e-22	-0.750998
Ahnak	0.874	0.863	5.3505e-23	-0.752991
Ttc28	0.033	0.38	6.3942e-19	-0.753616
Cxxc5	0.04	0.374	2.20719e-18	-0.755092
Mecom	0	0.338	1.72205e-22	-0.755211
Wasl	0.146	0.444	2.56238e-16	-0.756265
Pdia4	0.139	0.403	5.12221e-15	-0.757568
Itgb1	0.748	0.786	1.32908e-30	-0.757667
Olfml2b	0.02	0.328	4.59552e-19	-0.757855
Ar	0.02	0.308	1.23523e-18	-0.757934
Ablim1	0.026	0.316	3.45521e-15	-0.758711
Ginm1	0.325	0.54	1.63885e-19	-0.760179
Loxl3	0.073	0.34	7.06028e-15	-0.760436
Mrc2	0.007	0.342	1.02317e-20	-0.762003
Kazald1	0.026	0.322	3.28384e-18	-0.7622
Scarf2	0.026	0.368	4.25767e-23	-0.764167
Son	0.874	0.868	1.6137e-34	-0.764522
Itpripl2	0.219	0.485	5.4537e-17	-0.765443
Fscn1	0.013	0.349	6.10439e-21	-0.76677
Bcl7c	0.344	0.583	2.42806e-18	-0.766986
Rpsa	1	0.991	6.36216e-31	-0.768322
Pdlim7	0.238	0.503	8.51758e-19	-0.769106
Fam92a	0.079	0.436	2.09817e-19	-0.769324
Wipi1	0.159	0.45	4.55222e-25	-0.769437
Pigp	0.344	0.549	1.94955e-22	-0.770227
Bmp4	0.02	0.283	7.41436e-16	-0.771891
Tgfb2	0.007	0.334	6.58508e-20	-0.771987
Plod2	0.04	0.366	1.1304e-16	-0.774465
Ctdsp2	0.192	0.498	2.2988e-16	-0.776112
Rdx	0.603	0.73	9.33321e-25	-0.77722
Kmt2e	0.464	0.646	2.89663e-20	-0.777605
Rem1	0.026	0.315	2.10477e-19	-0.779182
Parva	0.026	0.42	5.18891e-24	-0.779414
Cdkn2c	0.139	0.417	1.59545e-15	-0.779807
Luc7l2	0.57	0.712	4.34854e-24	-0.780229
1700025G04Rik	0.132	0.407	6.85904e-23	-0.78111
Sptan1	0.205	0.481	4.08725e-18	-0.781985
Rpl37	0.993	0.997	6.2637e-41	-0.782842
Lix1l	0.079	0.438	1.06231e-19	-0.783598
Gm9780	0.02	0.349	2.0598e-18	-0.784589
Antxr1	0.026	0.375	3.37868e-22	-0.785024
Fhl2	0.033	0.306	1.67356e-12	-0.785264
Rpl23a	1	0.997	2.64336e-54	-0.786745
Sspn	0.013	0.381	5.30556e-24	-0.787021
Trim47	0.384	0.546	6.33326e-25	-0.787917
Rpl31	1	0.991	5.46338e-37	-0.788464
Cped1	0.04	0.371	3.57647e-20	-0.788833
Osr1	0.013	0.271	1.61482e-12	-0.788972
Rpl7	0.993	0.996	2.87133e-46	-0.789048
Qpct	0.219	0.483	2e-09	-0.789421
Col16a1	0.02	0.323	1.77913e-18	-0.789451
S100a11	0.974	0.975	7.23779e-28	-0.789653
Jade1	0.106	0.389	2.05065e-17	-0.791428
Pofut2	0.291	0.542	7.48097e-22	-0.793538
Sept4	0.007	0.27	1.91431e-14	-0.796257
Sntb2	0.325	0.554	3.47075e-19	-0.796488
Col5a3	0.02	0.323	2.46699e-17	-0.79718
Cd200	0.026	0.257	1.81757e-11	-0.798756
Sfr1	0.709	0.829	5.82092e-27	-0.800624
Hist1h2bc	0.344	0.544	3.52936e-09	-0.801374
Il6st	0.179	0.475	1.52968e-19	-0.803342
Tmem204	0.007	0.327	3.3421e-19	-0.805206
Rhoq	0.113	0.435	4.37395e-19	-0.806863
Scd1	0.013	0.35	4.28254e-20	-0.808718
Mprip	0.106	0.44	2.33109e-24	-0.809101
Kdelr1	0.642	0.726	2.62634e-38	-0.809508
Pink1	0.192	0.458	3.86696e-22	-0.809666
Gabarapl1	0.212	0.484	4.00892e-19	-0.810491
Svep1	0.02	0.328	1.55927e-18	-0.811614
9530068E07Rik	0.47	0.655	3.04508e-29	-0.811914
Fkbp1a	0.934	0.931	4.23056e-35	-0.813925
Filip1l	0.139	0.461	7.0389e-15	-0.814681
Serpinb6a	0.636	0.855	2.70468e-15	-0.815652
Eef1a1	1	1	3.71783e-54	-0.817026
Tprgl	0.662	0.76	4.30614e-29	-0.81708
Junb	0.96	0.903	1.36879e-09	-0.817841
Raph1	0.212	0.473	1.25701e-18	-0.818199
Cbx3	0.285	0.53	1.33137e-15	-0.820166
Ptgfrn	0.053	0.416	2.63673e-22	-0.822563
Scn1b	0.073	0.432	3.55963e-20	-0.822818
Ogt	0.404	0.614	8.17903e-22	-0.825294
Pbx1	0.06	0.417	2.48396e-19	-0.825618
Fmo2	0.04	0.276	1.0844e-08	-0.826105
Timp2	0.881	0.968	7.64665e-25	-0.826722
Emp1	0.901	0.854	2.32932e-21	-0.826848
4930523C07Rik	0.146	0.464	1.46225e-16	-0.828048
Tspan3	0.596	0.779	1.39701e-23	-0.829997
Pkd2	0.113	0.454	2.45252e-20	-0.830662
Cbx5	0.139	0.489	4.48425e-18	-0.831181
Rps15	1	0.997	1.04942e-50	-0.833132
Paip2	0.583	0.741	1.34777e-29	-0.833763
Errfi1	0.093	0.357	6.48589e-11	-0.835169
Tax1bp3	0.437	0.656	4.16114e-25	-0.837917
Tusc3	0.272	0.535	1.37174e-26	-0.84264
Itgb5	0.57	0.681	9.95386e-22	-0.84338
Tsen34	0.371	0.656	1.24179e-20	-0.847333
Fam114a1	0.119	0.478	7.76432e-24	-0.848648
Bok	0.02	0.345	5.6047e-20	-0.848752
Psip1	0.113	0.466	1.73595e-19	-0.849857
Ltbp3	0.046	0.409	2.41284e-24	-0.851205
Cdc42ep5	0.033	0.422	1.31149e-24	-0.852627
B3gnt9	0.026	0.426	1.27314e-24	-0.852852
Rpl36a	0.98	0.986	7.14275e-47	-0.853377
S100a6	0.98	0.996	2.42412e-19	-0.853939
Smim10l1	0.325	0.59	4.81089e-23	-0.854521
Ak1	0.013	0.396	3.77301e-25	-0.855899
Pxdc1	0.026	0.394	5.41824e-25	-0.856033
Dlc1	0.026	0.405	2.8232e-23	-0.858036
Lamb2	0.04	0.429	2.65645e-22	-0.860289
Oaz2	0.318	0.594	5.23895e-25	-0.862648
Sox4	0.073	0.4	3.18068e-16	-0.863096
Krtcap2	0.868	0.92	1.07944e-43	-0.863177
Ebf2	0.013	0.373	1.70306e-23	-0.863325
Map1b	0.046	0.398	1.08763e-20	-0.868609
Lbh	0.205	0.408	4.78509e-20	-0.87011
Gata6	0.026	0.409	1.91717e-27	-0.870505
Eef1b2	0.887	0.896	9.65384e-35	-0.872989
Rpl30	0.993	0.984	1.29681e-49	-0.874354
Marcks	0.768	0.748	1.06501e-31	-0.87548
Ifi27	0.623	0.813	2.65474e-17	-0.876045
Tnfrsf12a	0.172	0.406	8.28465e-14	-0.877007
Nfic	0.583	0.769	1.73707e-22	-0.8778
Zfos1	0.358	0.573	1.30265e-20	-0.87815
Pea15a	0.464	0.664	5.85582e-28	-0.879226
Emp2	0.026	0.424	1.87664e-24	-0.880943
Ahnak2	0.444	0.662	1.38826e-17	-0.884511
Itm2c	0.788	0.851	1.87455e-36	-0.884729
Cfl2	0.172	0.516	1.06024e-25	-0.88588
Il33	0.02	0.284	5.99609e-13	-0.886441
Hic1	0.033	0.394	8.12929e-22	-0.888353
Rpl13a	1	0.999	3.3613e-70	-0.888731
Wwtr1	0.026	0.43	4.17955e-27	-0.889202
Gpr153	0.026	0.431	6.17732e-26	-0.890416
Ccser2	0.152	0.514	1.89456e-23	-0.89045
Add3	0.139	0.471	3.94065e-19	-0.891186
Csrp1	0.318	0.555	1.72619e-19	-0.891342
Morf4l2	0.709	0.811	7.58553e-38	-0.893511
Arl1	0.722	0.828	6.08107e-36	-0.895075
Rcn2	0.331	0.611	1.7123e-26	-0.898197
Ngf	0.033	0.349	6.15377e-17	-0.901496
6030408B16Rik	0.026	0.315	8.75559e-15	-0.904039
Tmem176b	0.093	0.339	1.21089e-08	-0.906987
Mgst1	0.543	0.722	5.15476e-13	-0.908486
Cttn	0.053	0.466	1.46859e-28	-0.911638
Serpina3n	0.053	0.3	3.29427e-10	-0.91543
Aldh1a2	0.02	0.294	3.89041e-13	-0.917297
Cyb5a	0.901	0.941	1.38495e-26	-0.918034
Serf1	0.113	0.43	1.18803e-25	-0.91846
Tmem64	0.02	0.408	3.0857e-25	-0.92088
mt-Cytb	0.993	0.999	2.39821e-94	-0.921903
Cdc42ep2	0.053	0.413	1.92518e-20	-0.922925
Ccni	0.272	0.595	4.17802e-24	-0.926667
Ddr2	0.026	0.447	9.20116e-27	-0.926959
Adamtsl2	0.04	0.312	1.84775e-13	-0.927168
Ptms	0.768	0.845	1.12663e-37	-0.928639
Arhgef40	0.033	0.455	6.14006e-27	-0.92885
Tpm1	0.477	0.654	5.03639e-28	-0.928971
Slc50a1	0.391	0.632	1.20645e-31	-0.931107
Ttc3	0.192	0.535	1.78571e-27	-0.931959
Hmgn3	0.073	0.476	8.24597e-25	-0.933755
Ifngr1	0.616	0.722	1.79528e-22	-0.933989
Pura	0.411	0.687	8.52284e-25	-0.93403
Naalad2	0.02	0.44	3.05556e-28	-0.936039
Crip1	0.96	0.986	4.63372e-23	-0.938571
Mt2	0.325	0.375	9.66262e-08	-0.938923
Gna11	0.086	0.507	4.60951e-28	-0.940151
Cd151	0.351	0.593	6.43294e-27	-0.940666
Oat	0.51	0.729	4.13382e-28	-0.941601
Tsc22d1	0.132	0.454	3.76445e-19	-0.948901
Gem	0.013	0.355	4.99435e-22	-0.949612
Ikbip	0.119	0.527	1.81114e-26	-0.950148
Spon1	0.026	0.351	4.54677e-22	-0.95151
Fndc3b	0.245	0.565	4.82557e-27	-0.953193
Ssbp2	0.053	0.476	1.01146e-27	-0.953931
Ptov1	0.411	0.67	5.90041e-33	-0.956964
Ifi205	0.073	0.356	3.9241e-11	-0.957117
Dst	0.053	0.469	1.56465e-26	-0.960871
Tmem59	0.861	0.911	3.40666e-42	-0.963583
Sept11	0.351	0.595	2.58793e-28	-0.963734
Gas6	0.543	0.687	4e-09	-0.96565
Phlda1	0.325	0.596	8.8788e-11	-0.967829
Dpm3	0.49	0.724	1.69093e-32	-0.977204
Rps29	1	0.998	5.72395e-37	-0.977929
Cpxm1	0.04	0.38	2.43693e-23	-0.981725
Mxd4	0.318	0.652	4.89175e-26	-0.982973
Pdlim1	0.185	0.543	2.7373e-22	-0.98313
Rabac1	0.881	0.94	1.54544e-45	-0.983179
Pgf	0.026	0.309	1.18889e-13	-0.983637
Eif4a2	0.669	0.808	8.34415e-38	-0.98385
Hmgb1	0.834	0.914	1.64025e-38	-0.985404
Mdk	0.02	0.303	7.83866e-19	-0.986453
Ehd2	0.046	0.473	5.93317e-27	-0.987151
Tpm2	0.066	0.382	9.23999e-18	-0.988101
Lysmd2	0.02	0.446	7.23348e-31	-0.988985
Srpx	0.026	0.369	2.25126e-19	-0.989806
Lzts2	0.02	0.481	9.50627e-36	-0.991369
Tgfb1i1	0.02	0.473	3.68609e-32	-0.991492
Colec12	0.073	0.461	3.76709e-25	-0.994689
Zfp36l1	0.543	0.729	1.20835e-22	-0.996285
C1ra	0.033	0.402	3.33051e-25	-0.996468
Ppp1r14a	0.007	0.362	1.5356e-22	-0.999864
Dstn	0.861	0.916	1.06069e-42	-1.00193
Ly6c1	0.053	0.253	2.91598e-07	-1.00452
Slc44a1	0.073	0.506	4.04932e-31	-1.00872
Fam198b	0.159	0.484	1.01714e-20	-1.00901
Jup	0.139	0.485	1.16609e-26	-1.01191
Cd248	0.007	0.334	8.93967e-20	-1.01298
Dag1	0.079	0.522	1.71008e-30	-1.01708
Rras	0.106	0.551	9.50181e-28	-1.0215
Kdelr2	0.51	0.684	1.53848e-29	-1.02218
Dbn1	0.066	0.48	1.4777e-28	-1.02406
Bmp1	0.02	0.486	1.57933e-33	-1.02574
Prrx1	0.02	0.482	1.07768e-35	-1.02896
Herpud1	0.238	0.58	1.13573e-23	-1.03088
Pde1a	0.033	0.479	2.11053e-31	-1.03316
Fkbp10	0.04	0.48	2.03678e-31	-1.03341
Ltbp2	0.007	0.282	4.26489e-15	-1.03404
Tmed3	0.768	0.884	7.95947e-48	-1.0376
Rps4x	1	0.999	2.34941e-109	-1.03912
P3h4	0.053	0.519	2.19143e-32	-1.04011
Pdgfrb	0.026	0.468	2.75153e-29	-1.04287
Golim4	0.152	0.578	1.46983e-28	-1.04426
Rps12-ps3	0.623	0.741	7.77181e-39	-1.04747
Dap	0.762	0.812	9.23441e-54	-1.04921
Gnas	0.98	0.992	8.23748e-83	-1.05389
Amotl1	0.026	0.481	1.85056e-34	-1.05456
Rps20	0.987	0.992	1.5238e-60	-1.05756
C1s1	0.013	0.383	5.21771e-23	-1.05904
Ghr	0.033	0.496	1.30039e-32	-1.06171
Heyl	0.02	0.414	1.62843e-27	-1.06279
Cox7a2l	0.768	0.898	2.59112e-46	-1.0628
Rps12	1	0.988	9.31199e-52	-1.06831
Ypel3	0.51	0.797	9.73391e-27	-1.07087
Rbms3	0.046	0.503	1.6186e-32	-1.07209
Slc1a5	0.179	0.564	5.39491e-24	-1.07591
Rhoc	0.543	0.813	4.86696e-32	-1.08253
Vamp5	0.086	0.484	2.03555e-24	-1.08533
Rnf11	0.245	0.623	4.58169e-34	-1.08576
Dkk3	0.02	0.302	1.03989e-14	-1.0871
H1f0	0.338	0.636	5.01707e-20	-1.09085
Scara5	0.026	0.339	2.39334e-17	-1.09124
Rpl22l1	0.861	0.965	8.11481e-47	-1.09245
Mast4	0.033	0.503	4.66491e-34	-1.09288
Pdgfra	0.026	0.462	2.63358e-30	-1.09383
Ifitm2	0.94	0.982	2.35861e-56	-1.09506
Sox9	0.033	0.44	2.61019e-25	-1.0952
Fam101b	0.007	0.266	1.41857e-13	-1.09616
Rpl39	0.993	0.994	7.2858e-45	-1.09783
Rora	0.106	0.544	9.31256e-29	-1.1008
Gstm2	0.046	0.513	4.07417e-31	-1.10424
H2afv	0.371	0.722	7.63226e-34	-1.10459
Rplp1	1	0.999	9.68441e-67	-1.10674
Sulf1	0.04	0.515	1.03008e-32	-1.10815
Cyth3	0.139	0.587	1.91019e-28	-1.10835
Dclk1	0.053	0.485	5.53129e-30	-1.1146
Ccnd2	0.053	0.426	1.75441e-20	-1.12127
Nav1	0.285	0.624	7.72945e-30	-1.1226
C1qtnf6	0.04	0.441	3.02265e-26	-1.12617
Scn7a	0.026	0.475	1.23878e-30	-1.12885
Enpp2	0	0.346	2.7287e-23	-1.13048
Clmp	0.093	0.542	3.10575e-30	-1.13062
Pls3	0.079	0.547	1.58582e-31	-1.14232
Gm10073	0.642	0.755	3.3249e-51	-1.14621
Tbrg1	0.404	0.734	1.42753e-41	-1.15029
Rab34	0.066	0.58	6.88123e-38	-1.15104
Ctgf	0.026	0.34	1.44168e-17	-1.15316
Cd302	0.536	0.779	2.75713e-33	-1.15355
Mfap2	0.02	0.439	2.82596e-27	-1.15518
Eng	0.093	0.563	6.34133e-36	-1.1575
Rps27rt	0.517	0.723	1.22103e-35	-1.16272
Cst3	1	0.997	2.44852e-29	-1.16429
Hspa1a	0.166	0.312	8.55752e-06	-1.16573
Slc25a4	0.841	0.953	4.14502e-65	-1.16581
F2r	0.02	0.505	6.4904e-35	-1.16796
Ndn	0.04	0.541	1.34185e-35	-1.16835
Btg2	0.57	0.643	1.7211e-12	-1.17184
Lama4	0.04	0.531	5.50639e-36	-1.17932
Creb3l2	0.033	0.515	8.94905e-35	-1.18022
Gstm5	0.093	0.542	8.45925e-33	-1.18447
Gm42418	0.457	0.708	2.00103e-22	-1.18574
Atp1a2	0.033	0.448	4.57949e-27	-1.18706
Acta2	0.159	0.255	2.05318e-07	-1.20755
Fndc1	0.033	0.488	2.45871e-31	-1.21353
Sec62	0.755	0.897	3.48763e-67	-1.21884
Tmem45a	0.053	0.553	1.40047e-35	-1.21909
Itih5	0.007	0.456	1.25093e-32	-1.22208
C1qtnf2	0.026	0.53	3.5664e-38	-1.22241
Zeb1	0.033	0.545	3.66051e-39	-1.22332
Prnp	0.146	0.587	1.43815e-40	-1.22393
Loxl2	0.053	0.509	5.2447e-31	-1.2309
Eef2	0.98	0.987	3.21928e-75	-1.23114
C1qtnf7	0.026	0.53	5.79683e-37	-1.23178
Tgfb3	0.013	0.464	1.33614e-32	-1.23537
Gstt1	0.026	0.51	3.37181e-35	-1.23561
Tpst1	0.185	0.632	1.03446e-34	-1.23588
Gfpt2	0.04	0.448	5.99614e-25	-1.24681
mt-Nd2	0.907	0.98	9.37874e-59	-1.24687
Klf4	0.636	0.727	1.56735e-14	-1.24925
Dpysl2	0.305	0.682	3.54985e-34	-1.2498
Cd55	0.033	0.462	6.8372e-29	-1.25038
Thra	0.053	0.581	4.66076e-43	-1.25761
Chpf	0.046	0.566	1.59125e-40	-1.25835
Thbs2	0.02	0.451	4.1462e-29	-1.25919
Cxcl12	0.026	0.403	6.24214e-23	-1.26172
Efemp2	0.119	0.616	7.66604e-39	-1.26368
Tbx20	0.02	0.5	2.36159e-37	-1.26818
mt-Nd3	0.57	0.802	6.70022e-45	-1.26966
Gxylt2	0.04	0.47	3.30947e-28	-1.27301
Sgce	0.04	0.6	2.53442e-44	-1.28647
Nnmt	0.079	0.613	1.60778e-39	-1.28732
Fn1	0.689	0.477	4.96746e-25	-1.29122
Arf4	0.735	0.905	7.88538e-68	-1.29633
Gng11	0.212	0.681	1.75431e-37	-1.30063
Klf2	0.781	0.807	6.35269e-22	-1.30076
Spry1	0.02	0.535	3.11581e-39	-1.30648
Txnip	0.252	0.621	1.07872e-27	-1.30799
Fermt2	0.046	0.607	1.19893e-44	-1.31567
Slc29a1	0.225	0.662	7.05868e-34	-1.31675
Maged1	0.073	0.623	9.08958e-42	-1.3188
Ecm2	0.013	0.537	5.93804e-43	-1.33352
Vcan	0.086	0.588	1.13738e-35	-1.33584
Mfge8	0.179	0.697	1.24488e-40	-1.34554
P3h3	0.066	0.644	5.84859e-48	-1.35269
Abi3bp	0.04	0.534	8.97498e-35	-1.35545
Akap12	0.02	0.552	3.20584e-43	-1.35596
Rps27	1	0.999	1.90565e-111	-1.35709
Pfn1	0.291	0.6	1.79335e-37	-1.35938
Pdgfrl	0.046	0.491	1.33138e-28	-1.36464
Vkorc1	0.338	0.773	3.38006e-52	-1.37609
Frzb	0.026	0.498	2.26956e-35	-1.38083
Gpc6	0.026	0.59	1.3206e-46	-1.38308
Ndrg2	0.033	0.596	1.63029e-44	-1.39127
Lmo4	0.272	0.655	2.78528e-40	-1.40008
Plat	0.06	0.58	4.04857e-39	-1.40032
Gpx7	0.066	0.645	5.33533e-46	-1.40724
Uap1	0.219	0.61	1.5136e-31	-1.40903
Laptm4a	0.887	0.974	1.1764e-94	-1.413
Serpine1	0.106	0.387	4.06819e-13	-1.4174
Fcgrt	0.219	0.786	3.97589e-53	-1.42693
Ptrf	0.06	0.651	4.43618e-50	-1.42728
Vcam1	0.053	0.537	1.64685e-33	-1.43183
Rps21	0.974	0.968	5.8307e-78	-1.43635
Map1lc3a	0.232	0.745	5.3661e-56	-1.4473
Rnase4	0.742	0.939	7.47069e-53	-1.45487
Calu	0.371	0.781	4.89025e-66	-1.45728
Ace	0.073	0.634	2.60922e-43	-1.45966
Hmgn1	0.536	0.878	1.66648e-63	-1.46029
Heg1	0.066	0.628	6.61003e-45	-1.46255
Malat1	1	1	8.93535e-85	-1.46432
Jun	0.954	0.897	6.58559e-29	-1.46459
Lpar1	0.033	0.643	1.32575e-52	-1.46927
Lama2	0.046	0.638	4.36433e-52	-1.47182
Itgbl1	0.02	0.502	1.01783e-35	-1.47281
Emilin1	0.272	0.72	1.51399e-52	-1.47387
Kdelr3	0.086	0.675	2.14123e-49	-1.47481
Pla1a	0.066	0.479	6.32319e-27	-1.48669
Copz2	0.119	0.717	1.92641e-56	-1.4886
Matn2	0.046	0.622	5.21673e-48	-1.49256
Maged2	0.073	0.619	1.5319e-42	-1.4954
Rcn1	0.099	0.693	1.05995e-53	-1.49675
Pmepa1	0.086	0.593	6.21062e-39	-1.49746
Spon2	0.007	0.412	1.27351e-27	-1.50289
Vwa1	0.06	0.559	7.92657e-36	-1.50467
Il11ra1	0.384	0.779	2.90703e-41	-1.50479
Fgfr1	0.04	0.703	2.03251e-62	-1.50921
Phlda3	0.212	0.731	4.71506e-44	-1.50971
Fkbp7	0.093	0.715	1.37794e-55	-1.51269
Selenbp1	0.132	0.571	9.27356e-29	-1.51795
Lamb1	0.033	0.605	2.5364e-49	-1.52074
Htra1	0.066	0.584	5.2392e-42	-1.52991
Txndc5	0.43	0.823	3.9692e-70	-1.53488
Lox	0.053	0.354	5.31472e-17	-1.5404
Mxra7	0.053	0.697	1.18965e-58	-1.54108
Dpysl3	0.06	0.669	1.68308e-52	-1.54424
Nenf	0.563	0.918	3.83276e-85	-1.56566
Angptl2	0.093	0.648	3.73695e-46	-1.56599
Atf5	0.106	0.567	5.57913e-35	-1.57339
Nfix	0.093	0.711	3.44761e-56	-1.5737
Klf9	0.212	0.718	6.09335e-45	-1.57647
Hes1	0.086	0.611	1.35342e-37	-1.57713
Gsta3	0.033	0.431	1.51699e-27	-1.58323
Timp1	0.457	0.515	2.53075e-16	-1.5839
Plpp1	0.053	0.691	5.89284e-56	-1.58843
Cnn3	0.053	0.693	3.15058e-59	-1.59865
Prss23	0.046	0.574	5.56446e-40	-1.60142
Srpx2	0.053	0.643	1.47805e-50	-1.60808
Tnxb	0.04	0.571	8.8543e-41	-1.62382
Fkbp9	0.079	0.746	3.10647e-66	-1.62607
Col6a3	0.073	0.632	1.04812e-44	-1.62974
Ndufa4l2	0.046	0.571	2.18607e-40	-1.63154
Col14a1	0.033	0.528	3.93763e-38	-1.63159
Fhl1	0.073	0.693	2.82244e-55	-1.6343
Olfml3	0.43	0.825	5.79109e-46	-1.6367
Ms4a4d	0.046	0.608	1.41622e-44	-1.64333
C3	0.113	0.48	9.76055e-20	-1.64609
Ramp2	0.066	0.639	1.06053e-47	-1.64679
Mtch1	0.728	0.926	1.91711e-103	-1.65168
Cryab	0.093	0.718	4.08864e-57	-1.65443
Col5a1	0.053	0.619	3.16663e-46	-1.66858
Itm2a	0.02	0.58	1.13569e-49	-1.6778
Col4a2	0.033	0.598	6.07042e-50	-1.68128
Gpx8	0.06	0.754	1.80933e-70	-1.68351
Nfia	0.073	0.719	8.3529e-61	-1.68501
Ly6a	0.371	0.646	2.28948e-16	-1.69132
Cp	0.046	0.654	7.29066e-51	-1.70874
Hspg2	0.073	0.73	6.29792e-63	-1.71609
Cpq	0.166	0.749	7.62449e-59	-1.72148
Nfib	0.066	0.771	2.77914e-72	-1.72193
Mmp23	0.053	0.702	2.32161e-67	-1.7241
Npdc1	0.066	0.75	9.20441e-70	-1.72549
Aldh1a1	0.033	0.619	8.20809e-50	-1.72734
Camk2n1	0.04	0.625	3.42308e-49	-1.72861
Socs2	0.06	0.735	9.20981e-65	-1.73049
Eva1b	0.132	0.75	4.80903e-66	-1.73581
Plxdc2	0.046	0.718	1.6705e-66	-1.74435
Pcsk6	0.02	0.599	1.23907e-51	-1.74594
Cilp	0.066	0.342	4.63205e-12	-1.75564
Sod3	0.073	0.736	9.54293e-62	-1.756
Medag	0.066	0.732	5.13646e-65	-1.77072
Tppp3	0.232	0.58	8.87559e-29	-1.77203
Bicc1	0.079	0.776	9.58619e-71	-1.77821
H2B-EGFP	0.06	0.713	5.75738e-61	-1.80137
Nbl1	0.04	0.623	2.04217e-47	-1.80897
Abca8a	0.06	0.688	2.87485e-54	-1.83688
Snhg18	0.04	0.717	3.71933e-67	-1.83766
Islr	0.046	0.704	4.47822e-62	-1.84762
Pdlim2	0.272	0.829	1.17063e-73	-1.85575
Jund	0.854	0.953	4.41195e-58	-1.86707
Lamc1	0.179	0.8	4.80895e-69	-1.87122
Col4a1	0.066	0.696	1.62019e-58	-1.88025
Adamts2	0.06	0.746	8.82541e-69	-1.88103
Selm	0.325	0.912	3.47554e-89	-1.93294
Fibin	0.073	0.676	5.4305e-50	-1.93706
Hspb1	0.093	0.713	9.46957e-57	-1.94173
Nupr1	0.358	0.811	1.31658e-66	-1.94261
Aebp1	0.066	0.722	5.43778e-67	-1.94825
Ier2	0.616	0.828	1.03367e-30	-1.95607
Ddah2	0.119	0.835	2.13745e-84	-1.95827
Pmp22	0.51	0.933	6.18534e-80	-1.96033
Tcf4	0.397	0.901	9.24619e-87	-1.96042
Meox1	0.06	0.585	2.36937e-39	-1.97311
Plpp3	0.192	0.765	2.83185e-57	-1.97645
Axl	0.192	0.82	1.97268e-69	-1.99091
Slc43a3	0.099	0.759	2.73461e-65	-2.01837
Ppic	0.046	0.723	1.18369e-70	-2.0393
Ebf1	0.06	0.794	3.52931e-80	-2.07961
Rhoj	0.046	0.817	1.12609e-93	-2.09055
Hsd11b1	0.04	0.478	2.48739e-30	-2.09321
Fbln5	0.06	0.709	8.81671e-62	-2.09475
Pcolce2	0.079	0.765	3.46842e-68	-2.10821
Csrp2	0.166	0.627	4.25032e-39	-2.12623
Oaf	0.152	0.822	3.19827e-77	-2.12987
Cxcl1	0.119	0.446	5.64484e-18	-2.13653
Col6a2	0.079	0.849	5.89971e-94	-2.14358
S100a16	0.073	0.843	7.69647e-98	-2.15472
Col15a1	0.066	0.748	3.48619e-68	-2.16193
Mxra8	0.099	0.876	7.68379e-105	-2.16376
Nedd4	0.046	0.851	1.69561e-105	-2.16646
Fxyd1	0.066	0.863	3.52534e-104	-2.16736
G0s2	0.079	0.641	4.7415e-44	-2.18936
Wisp2	0.06	0.396	4.71915e-19	-2.19506
Entpd2	0.066	0.786	9.78482e-80	-2.20471
Sptbn1	0.285	0.904	9.98055e-110	-2.20702
Adamts5	0.073	0.711	2.37501e-58	-2.22336
Ptgis	0.053	0.843	2.46918e-98	-2.23749
Tm4sf1	0.079	0.787	2.87065e-76	-2.26369
Gpm6b	0.079	0.863	7.93655e-100	-2.30141
Col5a2	0.073	0.704	1.57851e-57	-2.30645
Igfbp6	0.152	0.672	6.18716e-45	-2.31202
Fbn1	0.086	0.784	1.47413e-72	-2.31442
Sdc2	0.099	0.889	2.27551e-110	-2.32549
Pam	0.146	0.825	1.10301e-79	-2.33027
Sfrp1	0.06	0.662	4.031e-52	-2.33755
Ptn	0.02	0.34	2.6865e-19	-2.33981
Rcn3	0.152	0.913	1.06515e-117	-2.3638
Prelp	0.053	0.832	2.99542e-95	-2.37599
Cald1	0.086	0.872	1.23029e-104	-2.39389
Prkcdbp	0.106	0.905	5.29248e-119	-2.40836
Egr1	0.245	0.81	4.04906e-59	-2.42618
Cthrc1	0.04	0.278	1.01016e-11	-2.43548
Fxyd6	0.053	0.738	1.33324e-70	-2.45688
Cyr61	0.106	0.604	3.21206e-38	-2.49984
Nid1	0.066	0.869	1.19367e-112	-2.50236
Gstm1	0.517	0.819	1.21241e-67	-2.52387
Tuba1a	0.702	0.972	6.21703e-134	-2.52765
Ltbp4	0.113	0.903	1.63382e-118	-2.53085
Sfrp2	0.013	0.331	3.29184e-19	-2.53829
Serpine2	0.073	0.816	5.00747e-88	-2.58917
Col6a1	0.073	0.927	1.17081e-138	-2.63845
Crispld2	0.06	0.8	1.56275e-83	-2.65332
Rarres2	0.139	0.904	4.51338e-110	-2.67342
Crip2	0.139	0.927	2.30939e-127	-2.69552
Mmp2	0.06	0.899	2.80536e-125	-2.699
Timp3	0.02	0.751	3.19343e-78	-2.7134
Cfh	0.179	0.904	1.67242e-102	-2.758
Zbtb20	0.331	0.97	3.69857e-169	-2.76916
Dpep1	0.099	0.707	2.21014e-54	-2.77712
Loxl1	0.113	0.932	1.01189e-139	-2.77795
Cygb	0.093	0.94	1.53243e-144	-2.78971
Serpinf1	0.106	0.93	7.14473e-133	-2.79208
Aspn	0.066	0.741	1.21633e-65	-2.81737
Gas1	0.053	0.844	1.81692e-100	-2.83246
Fbln2	0.159	0.906	5.13489e-116	-2.84164
Id3	0.166	0.826	2.52467e-75	-2.85536
Sparcl1	0.086	0.82	1.30328e-88	-2.85629
Fbln1	0.06	0.829	1.2395e-94	-2.88126
Pi16	0.205	0.795	2.15823e-58	-2.88978
Col8a1	0.119	0.76	9.19077e-63	-2.89051
Cd81	0.278	0.995	9.46686e-262	-2.9048
Lhfp	0.119	0.969	2.50669e-185	-2.91057
Cd34	0.126	0.918	1.86769e-121	-2.91748
Mfap5	0.278	0.94	1.75081e-124	-2.92326
Rbp1	0.132	0.929	4.18657e-134	-2.94848
Dpt	0.113	0.954	2.18989e-154	-2.95875
Ogn	0.099	0.867	7.35155e-105	-2.9989
Mfap4	0.093	0.619	8.73595e-43	-3.02106
Meg3	0.086	0.829	7.45769e-88	-3.03626
Eln	0.033	0.647	1.74288e-55	-3.08747
Ccdc80	0.225	0.982	9.31709e-188	-3.14174
Pcolce	0.199	0.971	1.62909e-173	-3.1432
Postn	0.146	0.536	3.99431e-28	-3.14635
Gpx3	0.338	0.935	6.37282e-117	-3.22469
Serping1	0.146	0.969	1.52406e-171	-3.22777
Clec3b	0.066	0.704	3.0589e-59	-3.24229
Htra3	0.166	0.92	3.12941e-117	-3.28094
Igfbp4	0.185	0.95	5.67726e-150	-3.29559
Smoc2	0.093	0.846	5.47175e-96	-3.39424
Fstl1	0.093	0.948	3.47598e-156	-3.41959
Serpinh1	0.192	0.99	2.08141e-247	-3.5141
Lum	0.272	0.983	9.56782e-202	-3.61847
Bgn	0.351	0.995	5.08876773044699e-314	-3.93081
Col1a1	0.205	0.966	2.41405e-157	-4.07041
Sparc	0.377	0.997	3.52599e-298	-4.08968
Col3a1	0.358	0.982	5.02603e-168	-4.12437
Col1a2	0.245	0.988	4.40323e-203	-4.19801
Igfbp7	0.43	1	0	-4.25794
Gsn	0.974	0.991	3.0115e-116	-4.35601
Mgp	0.623	0.986	6.49015e-183	-4.64368
Dcn	0.623	0.999	0	-4.68681

## Sheet: EPI vs Rest
Gene	pct.1	pct.2	p_val_adj	Log2FoldChange
Clu	0.867	0.057	3.75576e-111	4.27599
Saa3	0.482	0.008	1.18738e-58	3.80553
Cd74	0.398	0.011	5.11616e-38	2.21238
Calca	0.47	0.001	2.49034e-83	2.19868
Plac8	0.795	0.079	1.05206e-53	2.17193
Aebp1	1	0.714	9.95989e-100	2.13721
Nkain4	0.614	0.008	1.33013e-103	2.13323
C3	0.988	0.475	1.13361e-44	2.1195
C1s1	1	0.376	3.15139e-70	1.94474
Maf	0.807	0.024	3.79282e-107	1.91781
S100a1	0.904	0.275	2.38818e-91	1.85003
C4b	0.819	0.116	1.88523e-50	1.82703
Cpxm1	0.867	0.374	1.30061e-50	1.74307
Tmem176b	0.916	0.334	7.19074e-38	1.72711
Flrt2	0.807	0.113	1.771e-69	1.6975
Wt1	0.855	0.003	2.20264e-147	1.66068
Mfap2	0.952	0.432	8.61103e-47	1.63775
H2-Ab1	0.41	0.011	1.26417e-37	1.58872
Rspo1	0.735	0.016	5.63532e-87	1.57396
Lgals7	0.41	0.006	4.0209e-68	1.57244
Dmkn	0.458	0.004	3.8352e-58	1.56866
Igf1	0.916	0.628	1.09892e-30	1.53107
Enpp2	0.602	0.342	6.77206e-23	1.45608
Trf	0.747	0.292	1.53803e-19	1.45035
Col6a5	0.578	0.003	8.93231e-92	1.43953
Upk3b	0.265	0	1.33946e-42	1.4113
Mpp6	0.843	0.142	1.90974e-54	1.39193
Cav1	0.578	0.113	2.16648e-34	1.38666
Tmem176a	0.783	0.229	8.8909e-25	1.38462
H2-Aa	0.349	0.006	3.84867e-36	1.37591
Scara3	0.735	0.164	1.08996e-38	1.36208
Cxadr	0.614	0.001	4.55532e-111	1.35206
Cxcl12	0.663	0.399	3.0852e-11	1.32985
Osr1	0.807	0.266	1.98484e-23	1.32282
Col3a1	1	0.976	9.93266e-27	1.32202
Mmp14	0.976	0.594	5.63127e-34	1.3219
H2-Eb1	0.349	0.022	9.04818e-27	1.31523
Csrp2	0.94	0.621	6.24214e-17	1.2876
Lgmn	0.867	0.362	1.30159e-24	1.27606
Meg3	1	0.821	4.32272e-19	1.2666
Slc9a3r1	0.614	0.039	3.86751e-52	1.26601
Wnt4	0.639	0.019	1.63067e-65	1.23251
Atp1b1	0.627	0.063	1.07865e-34	1.22791
Tshz2	0.795	0.272	4.94413e-28	1.2279
Fndc1	0.904	0.481	1.44468e-25	1.22485
Ptgs1	0.578	0.011	2.91325e-67	1.22097
Cdh11	0.759	0.119	8.57821e-40	1.19569
Meis2	0.892	0.304	4.3247e-36	1.18603
Slit3	0.759	0.125	1.31954e-36	1.15466
Hp	0.301	0.027	1.94597e-13	1.14761
Cyp1b1	0.735	0.186	3.29577e-26	1.1338
Ncam1	0.566	0.095	1.68907e-26	1.12495
Marcksl1	0.795	0.239	2.43973e-22	1.09992
Gata6	0.88	0.404	5.95801e-27	1.09362
Col1a1	1	0.959	3.19111e-11	1.08321
Zfp36l1	0.988	0.726	1.89915e-22	1.07407
Col1a2	1	0.981	4.45035e-13	1.06812
Npc2	0.988	0.903	2.81849e-36	1.06696
Mdk	0.771	0.298	9.34478e-15	1.06339
Ildr2	0.699	0.056	7.919e-47	1.04622
C2	0.578	0.017	1.5375e-55	1.04576
Hspb1	0.831	0.706	2.01853e-10	1.03345
Gm10263	0.916	0.394	3.54332e-23	1.02731
Zfp503	0.602	0.059	9.47615e-36	1.01136
Rps27rt	0.976	0.72	1.29506e-23	1.00977
Smpd3	0.277	0.017	7.03308e-29	1.00021
Ldhb	0.602	0.186	7.49909e-17	0.999587
Sox4	0.807	0.395	3.60701e-15	0.993981
Cpz	0.675	0.027	5.34569e-60	0.989959
Sdc4	0.651	0.329	2.48298e-16	0.986064
Celf4	0.566	0.021	4.24029e-50	0.981738
Lrrn4	0.361	0	7.20897e-61	0.97568
Btg1	0.892	0.591	6.70642e-13	0.964984
Gatm	0.337	0.004	1.99522e-42	0.959689
Gpm6a	0.41	0	7.71971e-73	0.945132
Gda	0.675	0.223	1.53177e-15	0.941645
Hoxa5	0.458	0.001	5.06348e-78	0.939548
Pvrl2	0.639	0.062	8.86843e-40	0.931952
Rps28	1	0.995	3.5977e-34	0.924414
Steap4	0.675	0.091	1.15051e-33	0.919929
Fn1	0.976	0.476	2.67035e-24	0.917414
Adamts15	0.566	0.066	3.15417e-28	0.915436
Arhgdib	0.723	0.317	2.36593e-12	0.910606
Angptl4	0.687	0.179	3.99568e-18	0.908835
Htra1	0.892	0.578	1.49577e-10	0.906267
Dfna5	0.59	0.087	2.52336e-28	0.89764
Aprt	0.855	0.436	1.00516e-15	0.884198
Smim1	0.59	0.215	4.70424e-16	0.878729
Arl4a	0.699	0.321	2.44056e-15	0.878133
Pabpc1	0.976	0.822	1.53139e-19	0.862202
Fabp4	0.518	0.036	2.76841e-36	0.858841
Gpc3	0.434	0.05	1.93161e-19	0.851993
Meis1	0.759	0.172	9.22249e-26	0.841673
Gm12840	0.747	0.2	9.77912e-22	0.839823
Tsc22d1	0.783	0.45	3.83387e-09	0.838189
Sfrp2	0.855	0.325	7.43937e-18	0.832545
Syne2	0.627	0.192	6.20913e-14	0.831757
Wdr89	0.928	0.666	1.9878e-15	0.8303
H2-K1	0.892	0.779	2.63874e-07	0.823021
Rpl41	1	0.999	2.0193e-32	0.82254
Hist1h2bc	0.855	0.541	3.9834e-08	0.821818
Eef1b2	1	0.895	1.02166e-17	0.817184
Slc39a1	0.735	0.375	4.61912e-08	0.806279
Il1r1	0.699	0.248	1.33931e-14	0.797918
Myrf	0.506	0.017	1.77747e-45	0.791242
Mylk	0.422	0.035	1.54764e-24	0.789541
Rpl38	1	0.977	1.3204e-20	0.786537
Rpl39	1	0.994	5.91826e-27	0.785604
Ctsl	1	0.968	2.1273e-09	0.779072
Adgrd1	0.711	0.18	2.19509e-20	0.772471
Cotl1	0.783	0.257	4.98108e-18	0.753837
Cald1	0.964	0.864	2.20709e-07	0.753013
Cstb	0.94	0.641	2.14517e-10	0.74929
Fzd1	0.675	0.225	4.90191e-13	0.74408
Rps26-ps1	0.855	0.446	2.96449e-11	0.735698
Pbx1	0.795	0.411	2.7085e-10	0.735329
Gm10073	0.952	0.753	1.16342e-10	0.73475
Rps12-ps3	0.964	0.739	6.79443e-11	0.729678
Mt1	0.94	0.672	8.42439e-06	0.72799
Pdpn	0.843	0.451	4.94298e-10	0.719386
Heg1	0.94	0.622	4.21595e-09	0.719143
Plscr1	0.566	0.112	6.12252e-18	0.717831
Snhg18	0.976	0.709	7.7205e-13	0.716786
Ptger3	0.386	0.001	1.02707e-61	0.714944
Rpl37a	1	0.998	2.71835e-23	0.714035
Rps21	1	0.968	2.00181e-18	0.710731
Rpl10a	1	0.99	2.63256e-19	0.706974
Adamtsl1	0.506	0.02	3.14676e-42	0.706684
Rhou	0.627	0.145	4.8392e-18	0.702445
Nkd1	0.482	0.054	1.96333e-22	0.701815
Nsa2	0.916	0.602	1.32948e-09	0.701102
Grb10	0.735	0.295	6.03106e-12	0.695603
Ppfibp1	0.723	0.394	2.88035e-08	0.69425
H2-Q7	0.337	0.027	3.71514e-18	0.693853
Ezr	0.398	0.185	6.73429e-11	0.675262
Tcea3	0.699	0.186	1.20438e-18	0.675107
Rps27	1	0.999	9.74007e-22	0.669536
Rpl12	1	0.974	2.09783e-19	0.66674
Col18a1	0.446	0.089	7.99982e-14	0.666708
Rpl23	1	0.997	9.51742e-21	0.666486
Ifi204	0.639	0.184	5.2122e-14	0.665964
Rps20	1	0.992	3.84453e-19	0.665879
Man2a1	0.735	0.333	8.67665e-09	0.665625
Sbsn	0.446	0.076	5.65407e-14	0.663848
Slit2	0.434	0.128	8.68074e-09	0.657579
Plscr2	0.53	0.113	2.26306e-14	0.65678
Pdlim4	0.458	0.024	3.36754e-32	0.65541
Rps10	1	0.982	1.03328e-18	0.652325
Plat	0.916	0.574	2.01322e-07	0.651432
Acp5	0.494	0.043	4.18701e-27	0.651344
Sesn3	0.663	0.199	8.42444e-14	0.648107
Npl	0.373	0.005	6.71533e-43	0.646816
B4galt1	0.747	0.401	3.61973e-06	0.641054
Mndal	0.687	0.253	1.46537e-10	0.639725
Rpsa	1	0.991	1.89351e-18	0.637429
Cmtm3	0.807	0.438	8.31047e-08	0.63528
Wisp1	0.554	0.178	3.67202e-09	0.634664
Mapkapk3	0.518	0.063	2.46099e-23	0.632963
Isyna1	0.494	0.107	1.57001e-12	0.630905
Efnb1	0.518	0.162	1.34132e-09	0.627242
Gm11808	0.916	0.573	2.8e-08	0.626699
Gm9493	0.94	0.632	3.76779e-09	0.62596
Bambi	0.53	0.172	2.28493e-08	0.625264
Adam12	0.361	0.068	2.63809e-16	0.622922
Frmd4b	0.41	0.066	4.284e-14	0.62183
Soat1	0.578	0.181	2.08793e-10	0.620963
Rps17	1	0.992	8.83567e-18	0.620155
Prrx2	0.59	0.179	6.44715e-11	0.616914
Rps26	1	0.974	1.47685e-09	0.607711
Capn6	0.434	0.046	1.14131e-19	0.606706
Plce1	0.614	0.17	2.75241e-14	0.602204
Col4a5	0.554	0.204	9.95215e-08	0.601822
Rpl32	1	0.997	7.33019e-21	0.601318
Gm2a	0.795	0.392	1.89396e-08	0.598397
Sparc	1	0.991	6.11163e-09	0.594259
Il33	0.699	0.28	7.88844e-10	0.593642
mt-Nd3	0.952	0.799	2.27014e-06	0.59209
Rps3a1	1	0.998	1.39984e-17	0.589854
Rps8	1	0.999	1.06442e-20	0.586288
Plxna4	0.337	0.051	1.23712e-11	0.584358
Rspo3	0.277	0.024	7.74877e-14	0.581838
Rps27a	1	0.999	4.63076e-17	0.579745
Aplp1	0.301	0.021	9.89329e-18	0.574843
Rpl28	1	0.989	9.13732e-14	0.569938
Cbx6	0.723	0.358	8.7508e-07	0.568346
Gm8730	0.988	0.821	7e-09	0.567297
Bmp1	0.904	0.479	8.36812e-11	0.564745
C1ra	0.759	0.397	6.25493e-06	0.56423
Adamts9	0.361	0.023	4.20542e-22	0.563203
Map3k1	0.349	0.034	6.96064e-17	0.562856
Tmem151a	0.289	0.013	7.46825e-22	0.562179
Rpl36a	1	0.986	1.73715e-11	0.558012
Pfn1	0.916	0.596	4.3459e-06	0.555708
Mbp	0.349	0.004	7.82552e-40	0.555673
Cldn10	0.289	0.011	1.28251e-20	0.555318
Rplp1	1	0.999	3.0789e-17	0.554099
Serpinb6b	0.349	0.022	2.45518e-20	0.549861
Trabd2b	0.41	0.075	1.03674e-11	0.547176
Pafah1b3	0.518	0.085	4.05883e-18	0.546908
Mmp19	0.482	0.111	4.10532e-11	0.54669
Phldb2	0.614	0.212	1.41185e-09	0.545833
Pdzrn3	0.554	0.152	3.01655e-11	0.537881
Col5a2	0.976	0.697	2.73113e-08	0.533186
Ptges	0.422	0.069	3.66651e-14	0.531566
Spsb1	0.47	0.116	1.24452e-09	0.530692
Rps29	1	0.998	2.05633e-15	0.522753
Nedd4	0.988	0.843	6.71232e-10	0.520607
Stmn1	0.47	0.098	4.09623e-15	0.520186
Rps18-ps3	0.831	0.481	6.717e-06	0.520168
Arhgap29	0.542	0.212	1.73355e-07	0.518856
Rpl22l1	1	0.964	1.76237e-08	0.517752
Fdxr	0.422	0.097	2.26301e-09	0.516246
Rps12	1	0.988	3.01492e-14	0.51603
Lgi2	0.301	0.038	1.45358e-11	0.515861
Ngfrap1	0.723	0.288	3.78351e-11	0.512429
Rpl17	1	0.998	4.54739e-13	0.511818
Tpt1	1	0.999	6.11405e-13	0.508736
Gm1673	0.53	0.125	1.21754e-13	0.508634
Palld	0.614	0.203	1.95041e-11	0.50321
Med28	0.639	0.67	3.94217e-06	-0.50717
Ywhaq	0.843	0.833	4.12717e-06	-0.511514
Capg	0.687	0.623	3.53683e-06	-0.512574
Dpt	0.675	0.948	1.24535e-14	-0.5399
Mpc1	0.602	0.667	1.11147e-06	-0.541882
Rabac1	0.952	0.939	1.26322e-06	-0.551183
Gnas	0.988	0.992	1.31627e-08	-0.551642
Fkbp1a	0.94	0.931	1.52422e-06	-0.553519
Ier3ip1	0.723	0.741	2.70497e-09	-0.556178
Bnip2	0.422	0.526	3.13438e-07	-0.556358
Emc3	0.41	0.503	7.20881e-10	-0.557463
Tmem109	0.349	0.479	3.03418e-06	-0.558484
Sptbn1	0.94	0.898	1.08375e-06	-0.560445
Tmed2	0.928	0.924	4.47172e-07	-0.566198
Rnf11	0.566	0.62	2.33879e-08	-0.578269
Fermt2	0.542	0.602	1.70664e-06	-0.582239
Mbnl2	0.711	0.711	1.57717e-10	-0.58803
Lmo4	0.687	0.651	4.46869e-07	-0.594626
Ginm1	0.434	0.539	2.73e-07	-0.594837
Cycs	0.446	0.546	4.91692e-07	-0.618865
Degs1	0.506	0.611	7.2547e-07	-0.621081
Sgcb	0.193	0.399	1.6892e-08	-0.624157
Crip1	0.928	0.986	1.90379e-11	-0.625655
Tpst1	0.578	0.628	7.67203e-07	-0.626883
Cnbp	0.867	0.896	1.50142e-07	-0.631364
Dnajb11	0.518	0.63	3.27328e-08	-0.631664
Ddah2	0.819	0.828	4.2237e-07	-0.633892
Itgb5	0.651	0.68	3.60024e-06	-0.633996
Aplp2	0.614	0.692	1.84459e-06	-0.636708
Zeb1	0.458	0.541	1.17369e-09	-0.651007
Pxdc1	0.181	0.392	5.29871e-06	-0.655882
Cthrc1	0.47	0.275	8.6059e-08	-0.657197
Gstm5	0.47	0.539	4.58802e-08	-0.657229
Ptp4a1	0.59	0.612	1.44247e-12	-0.664419
Maged2	0.578	0.614	3.93455e-07	-0.680215
Rap1a	0.651	0.723	1.46892e-07	-0.680504
Col4a4	0.024	0.272	4.87815e-07	-0.686537
Lamb1	0.639	0.6	1.7597e-14	-0.689789
Bcl7c	0.41	0.581	2.46392e-08	-0.694681
Tmem50a	0.855	0.875	1.52138e-12	-0.697277
Lhfp	0.952	0.962	4.71591e-09	-0.6973
Fxyd1	0.831	0.856	2.73628e-08	-0.714642
Ppp1r2	0.627	0.662	8.04373e-13	-0.723659
Ctsd	0.916	0.843	3.43679e-09	-0.72518
Lysmd2	0.157	0.444	8.11759e-06	-0.726574
Tm4sf1	0.627	0.782	4.42337e-09	-0.729917
Tmem45a	0.41	0.55	2.65894e-08	-0.732095
Msc	0	0.265	7.49064e-07	-0.741406
Rem1	0.048	0.313	3.35946e-07	-0.747165
Mtch1	0.928	0.924	9.09395e-16	-0.756492
Lum	0.819	0.977	6.30197e-14	-0.762363
Rpn2	0.627	0.785	9.6438e-07	-0.775134
Anxa5	0.916	0.967	5.09789e-07	-0.78107
Bmp4	0	0.282	1.16477e-07	-0.785028
Sept7	0.783	0.867	2.32593e-10	-0.785337
Cd302	0.651	0.777	1.09344e-07	-0.786545
Acvrl1	0.193	0.486	9.21228e-08	-0.792521
Plpp1	0.542	0.686	1.47379e-06	-0.795307
Tmem204	0	0.325	7.13797e-10	-0.809312
Axl	0.735	0.815	2.1221e-06	-0.810216
Sept11	0.361	0.594	4.27571e-07	-0.812695
Glul	0.386	0.5	5.31919e-06	-0.815968
Snx18	0.205	0.498	2.00255e-07	-0.817641
F2r	0.265	0.502	1.889e-06	-0.818942
Vim	1	0.995	2.53346e-08	-0.818967
Jup	0.229	0.483	6.29322e-07	-0.821429
Aldh2	0.795	0.834	2.08623e-07	-0.823628
Ndrg2	0.446	0.592	6.70524e-09	-0.830141
Ngf	0.096	0.348	5.99753e-07	-0.837078
Tprgl	0.602	0.76	1.73349e-11	-0.846105
Drap1	0.566	0.716	1.99694e-11	-0.859905
Cyth3	0.337	0.585	1.66441e-08	-0.861422
Lamp1	0.88	0.947	7.35355e-15	-0.870764
Klf13	0.361	0.616	2.60602e-08	-0.871382
Nid1	0.747	0.862	4.37807e-09	-0.871869
Fam198b	0.169	0.482	9.11316e-06	-0.880018
Phlda3	0.639	0.727	1.74778e-14	-0.927552
Rhob	0.325	0.59	2.66975e-06	-0.930774
Eng	0.205	0.561	4.83563e-10	-0.931526
Mfge8	0.506	0.693	9.78104e-12	-0.937337
Fbln5	0.59	0.704	1.95782e-06	-0.961966
C1qtnf2	0.205	0.527	3.12149e-11	-0.971816
Heyl	0.072	0.412	3.85469e-09	-0.986847
Mfap5	0.795	0.935	1.38877e-06	-0.987662
Ppp1r14a	0.012	0.36	1e-09	-0.9902
Slc29a1	0.337	0.66	1.37504e-08	-1.00127
Pgf	0.048	0.308	4.06634e-09	-1.00905
Selm	0.867	0.907	8.88731e-20	-1.02068
Col4a2	0.313	0.595	6.28561e-06	-1.02296
Slc43a3	0.627	0.754	1.1e-08	-1.03029
Ugp2	0.59	0.71	6.29189e-14	-1.0362
Jund	0.928	0.952	1.25431e-06	-1.04128
Lama2	0.241	0.635	1.34705e-10	-1.04764
Socs2	0.47	0.73	1.22146e-11	-1.05243
Medag	0.458	0.728	4.19539e-11	-1.05248
Qpct	0.108	0.482	2.17782e-10	-1.0679
Ccnd1	0.048	0.356	6.78149e-11	-1.06792
Col4a1	0.398	0.692	4.28439e-08	-1.09226
Ecm2	0.133	0.534	2.12231e-11	-1.10951
Gpc6	0.169	0.587	1.69442e-12	-1.11412
Gng11	0.349	0.678	7.94163e-15	-1.12151
Oaf	0.675	0.817	1.04953e-13	-1.12478
Pam	0.723	0.819	1.96172e-11	-1.12489
Spry1	0.096	0.533	3.44617e-12	-1.13181
Pdgfrl	0.229	0.488	2e-09	-1.13356
Ramp2	0.386	0.635	1.41725e-12	-1.14114
Lpar1	0.229	0.64	1.00315e-13	-1.14351
Entpd2	0.542	0.781	1.42225e-10	-1.14477
Sod3	0.386	0.731	1.12013e-12	-1.14937
Cfh	0.831	0.898	7.92558e-11	-1.16239
Islr	0.494	0.699	4.87973e-16	-1.16268
Tbx20	0.072	0.497	2.61945e-14	-1.17297
Igfbp7	1	0.994	1.97976e-23	-1.175
S100a6	0.976	0.996	2.93964e-53	-1.18326
Tcf4	0.699	0.897	6.23461e-19	-1.21014
Anxa3	0.398	0.629	5.33752e-13	-1.23265
Ace	0.205	0.631	1.01389e-14	-1.23807
Lamc1	0.554	0.795	5.72619e-19	-1.24134
Adamts5	0.59	0.706	1.94117e-10	-1.24177
Vwa1	0.157	0.556	7.80007e-11	-1.25372
Cd34	0.855	0.911	3.27523e-14	-1.25538
Selenbp1	0.325	0.568	5.53603e-12	-1.28679
Fhl1	0.313	0.689	8.48742e-18	-1.29653
Frzb	0.084	0.496	3.55802e-14	-1.2973
Lpl	0.554	0.777	4.3753e-06	-1.30219
Pcolce	0.904	0.964	2.58211e-24	-1.31933
Tppp3	0.253	0.578	7.56433e-06	-1.33131
Ndufa4l2	0.205	0.568	2.06937e-12	-1.34425
Camk2n1	0.301	0.621	6.07684e-15	-1.34571
Ifngr1	0.337	0.723	1.81888e-16	-1.35564
Ms4a4d	0.193	0.605	5.98533e-15	-1.40155
Gpx3	0.554	0.931	3.6793e-23	-1.41318
Abca8a	0.361	0.684	1.69419e-16	-1.43842
Tuba1a	0.916	0.97	4.94342e-29	-1.4395
Srpx2	0.157	0.64	9.10291e-20	-1.43993
Htra3	0.783	0.914	2.3003e-16	-1.44429
Ebf1	0.241	0.79	5.22679e-22	-1.4753
Crispld2	0.482	0.795	4.83399e-13	-1.49918
Gsta3	0.108	0.429	5.0945e-13	-1.50557
Pmp22	0.831	0.93	2.94569e-32	-1.50839
Tsc22d3	0.169	0.622	1.59151e-16	-1.50971
Ifi27l2a	0.759	0.878	4.17667e-07	-1.51067
Ogn	0.687	0.861	2.33887e-18	-1.52706
Cygb	0.602	0.934	4.32758e-28	-1.55758
Cd9	0.675	0.856	4.01806e-20	-1.55975
Pcsk6	0.12	0.596	1.10179e-19	-1.60287
Sdc2	0.59	0.883	4.99731e-35	-1.60646
Fxyd6	0.434	0.733	3.03466e-15	-1.60865
Pdlim2	0.361	0.827	4.17163e-30	-1.62567
Emp1	0.506	0.856	1.08769e-22	-1.6675
Prelp	0.434	0.827	2.42793e-24	-1.67217
Ltbp4	0.59	0.897	3.56597e-34	-1.68511
Ckb	0.349	0.758	3.61466e-24	-1.76389
Fibin	0.217	0.673	1.63369e-23	-1.89101
Wisp2	0.241	0.393	2.35919e-08	-1.89627
Gpm6b	0.41	0.858	6.73797e-38	-1.91454
Meox1	0.096	0.583	1.9782e-17	-1.92371
Cyr61	0.265	0.601	1.70203e-09	-1.92443
G0s2	0.193	0.638	1.39344e-17	-2.05244
Cst3	0.988	0.997	3.82498e-39	-2.08529
Hsd11b1	0.06	0.476	2.45524e-17	-2.09321
Sparcl1	0.229	0.816	2.247e-29	-2.16323
Pcolce2	0.06	0.762	1.21908e-38	-2.24547
Gstm1	0.542	0.818	3.45186e-28	-2.29721
Crip2	0.253	0.923	6.40748e-53	-2.30313
Postn	0.651	0.531	1.26142e-25	-2.33034
Dpep1	0.325	0.703	7.21861e-19	-2.34031
Aspn	0.265	0.737	5.71685e-24	-2.34405
Serpine2	0.169	0.812	1.27142e-37	-2.3666
Clec3b	0.434	0.7	4.29006e-22	-2.45608
Col8a1	0.229	0.757	2.78198e-30	-2.87911
Smoc2	0.277	0.842	5.63078e-36	-2.90332
Pi16	0.349	0.792	9.0431e-24	-2.94248
Gsn	0.952	0.991	5.70173e-61	-4.64459

[truncated: 1 more sheets: EC vs Rest]
