# Supplementary material for: Single-cell expression profiling reveals dynamic flux of cardiac stromal, vascular and immune cells in health and injury
Source: eLife journal article supplement (doi:10.7554/elife.43882), 2019-03-26
Supplement: supp [file elife-43882-supp-v1.zip › elife_poa_e43882_Supplementary_File_5.xlsx]

## Sheet: F-SL (sham) vs F-SH (sham)
Gene	pct.1	pct.2	p_val_adj	Log2FoldChange
Hsd11b1	0.852	0.517	0	1.67441
Mgp	0.997	0.96	0	1.08417
Hn1	0.505	0.886	0	-1.06452
Mfap5	0.876	0.995	0	-1.30434
Gfpt2	0.258	0.769	0	-1.49666
Efhd1	0.08	0.613	0	-1.51074
Ly6c1	0.067	0.507	0	-1.52112
Pi16	0.809	0.98	0	-1.68732
Tmem100	0.059	0.551	0	-1.70911
Cd248	0.102	0.702	0	-1.78058
Ly6a	0.469	0.952	0	-1.89364
Igfbp7	1	0.998	3.72192496719003e-318	0.663941
Axl	0.741	0.962	1.8984e-298	-0.974918
Sema3c	0.028	0.391	2.30715e-296	-1.09899
Timp2	0.932	0.997	1.20169e-291	-0.859288
Pcolce2	0.724	0.966	5.66805e-286	-0.983291
Nbl1	0.431	0.807	2.60975e-275	-1.19133
Cd55	0.382	0.762	1.11218e-273	-1.0618
Lrrn4cl	0.145	0.573	7.53038e-266	-1.07145
Ugdh	0.262	0.645	1.00985e-265	-1.07799
Tmsb4x	0.987	0.999	1.33732e-261	-0.732681
Uap1	0.495	0.811	2.88818e-253	-0.97129
Ppp1r14b	0.23	0.623	7.71164e-252	-1.04286
Sept4	0.505	0.127	4.29702e-250	1.17179
Uqcc2	0.518	0.842	5.59594e-250	-0.910425
Dcn	1	1	3.16792e-248	0.616352
Crip1	0.976	0.999	1.97398e-245	-0.988862
Limch1	0.021	0.327	1.05767e-234	-0.781078
Ackr3	0.11	0.501	5.40146e-234	-0.86384
Apoe	0.843	0.646	4.43098e-233	2.01419
Ifi27l2a	0.857	0.981	5.2807e-229	-1.1724
Fstl1	0.863	0.977	1.34108e-228	-0.850888
Adgrd1	0.071	0.426	1.5443e-228	-0.838257
Fn1	0.115	0.482	3.22807e-221	-1.03505
Cd34	0.942	0.996	2.63136e-211	-0.715632
Ecm1	0.655	0.92	9.1366e-211	-0.897822
Fbn1	0.615	0.856	1.54463e-208	-0.898697
Crispld2	0.966	0.871	2.26986e-204	0.793762
Klf4	0.687	0.944	1.61904e-198	-0.942596
Emilin2	0.107	0.451	1.71898e-195	-0.783485
1700019D03Rik	0.05	0.358	3.19498e-193	-0.674256
S100a10	0.926	0.99	2.84155e-190	-0.72734
Ndufa4l2	0.705	0.402	4.15056e-188	1.03511
Smoc2	0.982	0.97	4.57515e-187	0.789991
Zfp385a	0.312	0.675	3.62827e-184	-0.791914
Sparcl1	0.975	0.941	7.03357e-184	0.70147
Scara5	0.44	0.784	2.02858e-175	-0.800801
Tppp3	0.511	0.838	5.97762e-175	-0.973073
G0s2	0.91	0.777	2.05961e-173	1.01501
Gpm6b	0.916	0.837	1.12523e-169	0.732101
Lhfp	0.966	0.95	8.94719e-169	0.607943
Carhsp1	0.403	0.726	5.29577e-167	-0.713341
Ablim1	0.23	0.599	7.00474e-166	-0.677445
Gas7	0.133	0.46	1.91845e-164	-0.715033
Prkcdbp	0.801	0.944	4.44313e-163	-0.679784
Serpinb6a	0.778	0.94	2.25815e-162	-0.673302
Actg1	0.967	0.996	2.14665e-161	-0.801025
Cst3	0.998	0.996	5.8327e-160	0.707275
Lpl	0.948	0.887	9.38875e-160	0.883756
Ahnak	0.753	0.942	2.20913e-157	-0.676722
Anxa1	0.766	0.939	1.39249e-153	-0.710248
Sulf2	0.208	0.548	4.51493e-152	-0.706932
Gsta3	0.785	0.614	1.75319e-151	0.904239
Myoc	0.152	0.458	4.92418e-151	-1.13187
Thbd	0.234	0.547	2.31391e-148	-0.71682
Lims2	0.245	0.588	2.78702e-148	-0.664674
Dpt	0.947	0.994	4.79384e-147	-0.562819
Vim	0.985	0.998	3.05204e-146	-0.537329
Ifngr1	0.847	0.77	3.81068e-145	0.664535
Vcan	0.356	0.682	1.28548e-143	-0.683765
Col14a1	0.206	0.529	2.81894e-141	-0.693385
Aldh1a1	0.758	0.659	1.78878e-139	0.751925
Spon1	0.53	0.272	2.23289e-138	0.827957
Ebf1	0.776	0.919	4.25153e-137	-0.711061
Ugp2	0.624	0.829	2.02842e-133	-0.655332
Ahnak2	0.515	0.811	4.49734e-133	-0.62115
Pcsk6	0.699	0.907	1.84642e-132	-0.657714
Heyl	0.55	0.314	3.63373e-131	0.806736
Colec12	0.518	0.344	3.99331e-130	0.658189
Thy1	0.12	0.384	6.18274e-129	-0.749661
Gda	0.12	0.4	1.62603e-128	-0.551871
Ptrf	0.518	0.807	5.49454e-128	-0.588729
Dbn1	0.304	0.604	1.07834e-125	-0.636456
Mgll	0.088	0.351	3.89409e-125	-0.548096
Efemp1	0.142	0.43	4.67084e-125	-0.90325
Col6a3	0.659	0.471	6.61516e-123	0.748212
Klf2	0.7	0.916	2.30974e-121	-0.831088
Hspb8	0.071	0.312	1.39087e-119	-0.541371
Creb5	0.271	0.582	5.37917e-119	-0.589052
Nrp1	0.648	0.518	5.59039e-118	0.666681
Anxa3	0.488	0.742	2.75429e-117	-0.770927
Anxa2	0.874	0.966	4.68736e-117	-0.579253
Cd9	0.751	0.949	1.80271e-115	-0.58901
Angptl2	0.751	0.675	1.23365e-114	0.612941
Fbln2	0.868	0.979	2.7785e-112	-0.544044
Adm	0.432	0.191	1.93483e-111	1.10234
Igfbp6	0.797	0.912	3.09321e-111	-0.761444
Cpxm1	0.447	0.26	1.67405e-110	0.715481
Nmb	0.402	0.201	5.78201e-109	0.973715
Metrnl	0.171	0.43	1.52254e-108	-0.541936
Bmp4	0.477	0.316	1.79809e-108	0.668068
Tmem204	0.443	0.267	4.61978e-108	0.6346
Frzb	0.419	0.237	6.0323e-105	0.661996
Rbp1	0.925	0.855	7.67747e-103	0.549508
Qpct	0.436	0.714	5.1247e-101	-0.554637
Sfrp1	0.443	0.739	1.30142e-100	-0.502004
Sept11	0.592	0.482	3.33344e-100	0.545271
Fmo2	0.458	0.248	3.8126e-100	0.779445
Fhl1	0.591	0.833	1.02285e-99	-0.54103
Il11ra1	0.753	0.67	5.63795e-99	0.557563
Cyb5r3	0.37	0.653	2.20381e-98	-0.531865
Rhoc	0.685	0.874	2.52524e-98	-0.522506
Gstt1	0.648	0.554	3.40523e-97	0.538737
Lsp1	0.561	0.818	3.82719e-96	-0.540131
Zyx	0.382	0.65	9.18108e-96	-0.541412
Rgs17	0.327	0.132	4.28137e-94	0.670347
Ms4a4d	0.841	0.764	1.55348e-93	0.551145
Foxs1	0.287	0.105	5.03408e-93	0.638188
Col4a1	0.712	0.645	5.73425e-92	0.517343
Spry1	0.636	0.504	9.77294e-91	0.612855
Hs3st1	0.231	0.496	4.677e-89	-0.504796
Msc	0.367	0.206	2.14477e-86	0.681962
Gm12840	0.082	0.292	2.16153e-86	-0.787916
Vcam1	0.547	0.411	2.81382e-85	0.696367
Camk2n1	0.72	0.896	1.43333e-84	-0.516205
Ndrg2	0.65	0.534	3.97405e-84	0.543359
Rgs3	0.323	0.18	1.3238e-81	0.531077
Ppp1r14a	0.532	0.458	1.54315e-81	0.540559
Htra1	0.746	0.692	6.79072e-81	0.506372
Rem1	0.481	0.353	2.76214e-80	0.529226
Atp1a2	0.652	0.507	6.35631e-77	0.58424
Csrp2	0.257	0.49	1.34597e-74	-0.515345
Cd83	0.273	0.125	8.50254e-74	0.559841
Txnip	0.762	0.692	1.0321e-70	0.536663
Prss23	0.73	0.665	7.41393e-67	0.539743
Slco2b1	0.298	0.159	1.31845e-65	0.519241
C1s1	0.486	0.335	3.11537e-62	0.566518
Dpep1	0.942	0.914	1.7655e-58	0.543184
Cdkn1a	0.315	0.533	3.89798e-55	-0.56356
Nr4a1	0.206	0.408	5.91555e-54	-0.522341
Cxcl14	0.374	0.222	9.25494e-48	1.28976
Apod	0.27	0.207	3.47661e-45	0.541151
Penk	0.28	0.176	8.399e-45	0.570552
Inmt	0.272	0.154	1.733e-39	0.948546
Hspa1a	0.362	0.391	5.84908e-32	0.554433
Atf3	0.166	0.295	4.0037e-24	-0.505532
Wisp2	0.281	0.228	9.11673e-24	0.665848

## Sheet: F-Trans vs F-SL + F-SH
Gene	pct.1	pct.2	p_val_adj	Log2FoldChange
Fgl2	0.686	0.121	0	1.94883
Smoc2	0.748	0.973	0	-1.37988
Cpe	0.416	0.032	1.67106835261593e-317	1.20225
Pla1a	0.15	0.678	1.06872416915028e-316	-1.64276
Cfh	0.989	0.915	2.56635e-287	1.08687
Apoe	0.959	0.738	7.90573e-265	1.61797
Prss23	0.205	0.685	1.08713e-262	-1.46167
Timp3	0.89	0.753	3.89289e-241	1.26103
Pdlim3	0.444	0.078	6.09925e-237	1.11383
Adamts5	0.571	0.895	1.41463e-236	-1.18243
Dkk3	0.385	0.081	7.5801e-232	1.07312
Srpx	0.592	0.283	3.03277e-215	1.22259
Gstm5	0.664	0.478	3.38913e-206	0.927622
Fbln1	0.955	0.87	6.42652e-203	0.998943
Mgp	0.999	0.981	3.14907e-197	1.09794
Hsd11b1	0.343	0.707	1.91344e-194	-1.61642
Gas6	0.808	0.624	1.33349e-192	1.17671
Il11ra1	0.868	0.712	4.03187e-190	0.89316
Lamb1	0.307	0.715	5.62216e-190	-1.04663
Ccdc80	0.992	0.972	2.46698e-183	0.933726
S100a6	0.992	0.998	2.89349e-183	-0.612615
Cst3	0.999	0.996	3.47886e-183	0.904753
Pcsk6	0.437	0.779	1.20717e-180	-1.06614
Cdc42ep3	0.414	0.121	1.05883e-179	1.05193
Oaf	0.617	0.865	1.72712e-177	-0.960126
Timp1	0.506	0.224	1.94824e-175	1.28076
Olfml2b	0.492	0.179	4.98899e-175	0.909625
Igf1	0.677	0.513	1.45613e-174	1.01964
Gsta3	0.307	0.693	2.76082e-166	-1.15584
Prg4	0.32	0.072	3.31423e-158	1.77129
Clec3b	0.836	0.978	3.4556e-158	-0.679161
Lpl	0.693	0.917	1.03427e-150	-1.02033
Mfap2	0.544	0.265	3.28357e-147	0.850204
Col3a1	0.979	0.977	6.67002e-141	0.958353
Sparcl1	0.8	0.957	1.87139e-140	-0.747492
Mfap4	0.647	0.398	7.30994e-136	1.45928
Fxyd6	0.771	0.604	2.20659e-130	0.812484
Tmem45a	0.561	0.416	3.07402e-127	0.639864
Cxcl12	0.46	0.314	2.6149e-125	0.869096
Col14a1	0.624	0.355	3.42036e-124	0.841002
Vit	0.458	0.161	2.3709e-123	0.847656
Tmem176b	0.381	0.128	5.04626e-119	1.14618
Crispld2	0.764	0.915	5.49475e-117	-0.818493
Csrp2	0.576	0.376	2.00242e-116	0.885254
Vwa1	0.449	0.751	4.03068e-115	-0.771119
Scara5	0.228	0.566	5.56421e-113	-0.831915
Nid1	0.743	0.928	2.59e-112	-0.632139
Plxdc2	0.463	0.737	1.11531e-109	-0.773872
Tnfaip2	0.133	0.445	2.59848e-108	-0.800846
Lamc1	0.636	0.864	3.35998e-105	-0.657699
Marcks	0.464	0.737	2.32529e-103	-0.794235
Hspg2	0.479	0.742	2.73079e-103	-0.724175
Igfbp6	0.531	0.818	5.10856e-103	-0.690357
Sfrp1	0.713	0.579	5.58117e-100	0.82147
Rbp1	0.96	0.883	6.20992e-99	0.60389
Ces1d	0.125	0.396	7.10656e-99	-0.916983
Angptl2	0.433	0.715	4.21051e-98	-0.756343
Tbx20	0.493	0.397	4.4112e-94	0.620871
Fbln2	0.765	0.915	7.97734e-93	-0.661369
Tcf4	0.776	0.916	2.49317e-92	-0.608308
Mdk	0.309	0.114	2.18564e-91	0.715537
Il33	0.439	0.236	2.73078e-91	0.831252
Id3	0.839	0.725	4.10397e-91	0.861027
C4b	0.253	0.063	5.11478e-89	0.787901
Id2	0.605	0.392	3.98272e-84	0.84362
Serpina3n	0.346	0.19	2.13479e-83	0.812403
Sfrp2	0.326	0.178	8.8759e-83	1.20412
Jup	0.229	0.51	3.79501e-81	-0.64781
Spon2	0.278	0.567	6.51768e-81	-0.788591
Fibin	0.378	0.667	3.13487e-80	-0.655834
Fmo2	0.555	0.358	1.10493e-79	0.775645
Col4a1	0.45	0.692	6.11382e-79	-0.672309
Srpx2	0.329	0.603	4.48155e-78	-0.666939
Tmem176a	0.256	0.082	6.56685e-77	0.840936
Adamts2	0.713	0.627	1.85027e-76	0.521397
Loxl2	0.196	0.449	1.30922e-72	-0.664797
Tm4sf1	0.748	0.682	4.32074e-72	0.570403
Col5a3	0.156	0.401	7.37585e-72	-0.648197
Ms4a4d	0.587	0.799	4.20616e-71	-0.581363
Apod	0.258	0.25	2.38164e-68	0.980216
Pdgfrl	0.499	0.311	1.77511e-65	0.643442
Wisp2	0.417	0.266	3.59327e-65	1.26732
Pgf	0.21	0.456	1.84636e-64	-0.710219
Ecm1	0.862	0.761	1.41745e-63	0.576522
Ccnd1	0.173	0.413	2.27977e-63	-0.678481
Csrp1	0.562	0.455	3.75559e-63	0.508196
Slc16a2	0.47	0.277	5.28493e-63	0.564282
Ifi205	0.255	0.51	1.16503e-61	-0.550942
Lrrn4cl	0.103	0.314	1.70856e-61	-0.650078
Gadd45g	0.449	0.241	1.0768e-60	0.848468
Col1a1	0.95	0.947	6.29326e-60	0.504673
Pdzd2	0.136	0.36	1.49365e-59	-0.55877
Bambi	0.264	0.111	3.13406e-59	0.513773
G0s2	0.665	0.841	3.22791e-59	-0.665909
Atf5	0.455	0.67	1.93972e-58	-0.668677
Dhrs3	0.431	0.252	5.85665e-57	0.536951
Gsn	1	1	6.77381e-57	0.502283
Col4a2	0.317	0.527	1.02247e-56	-0.568029
Drap1	0.58	0.769	5.60997e-56	-0.512
Anxa3	0.415	0.596	2.62427e-55	-0.708015
Tmem119	0.43	0.258	2.20055e-51	0.50967
Tgfbi	0.54	0.34	1.99653e-50	0.629519
Fbn1	0.579	0.722	5.78693e-50	-0.579035
Ifngr1	0.644	0.796	1.1182e-49	-0.510622
Cd55	0.375	0.541	7.52567e-49	-0.586348
Pfn1	0.42	0.645	8.04644e-49	-0.536308
Axl	0.743	0.834	8.09779e-49	-0.508336
Sulf2	0.535	0.353	8.55119e-49	0.522458
Klf4	0.661	0.791	8.59021e-49	-0.726711
Fam46a	0.442	0.313	6.45363e-47	0.519196
Nmb	0.126	0.313	2.78131e-46	-0.703007
Pi16	0.721	0.866	7.07431e-45	-0.699345
Id1	0.279	0.141	9.58216e-45	0.531776
Hist1h2bc	0.531	0.387	1.08114e-43	0.517948
Trf	0.372	0.284	1.04651e-41	0.620903
Efhd1	0.124	0.291	6.81901e-41	-0.597008
Spry1	0.377	0.577	9.45318e-41	-0.507053
Ccnd2	0.491	0.318	1.62323e-37	0.517809
Osr1	0.414	0.298	4.93024e-37	0.55947
Cd248	0.265	0.342	4.51374e-36	-0.524316
Eln	0.658	0.657	1.25882e-34	0.541729
Hspa1a	0.232	0.369	5.08726e-34	-0.910465
Inmt	0.323	0.209	1.17847e-31	0.978237
Myoc	0.333	0.27	8.32643e-26	0.652983
Cxcl14	0.163	0.305	1.12227e-23	-1.0391
Aspn	0.551	0.67	1.59268e-23	-0.541993
Serpine1	0.184	0.289	3.69475e-16	-0.594825
Cxcl1	0.395	0.513	6.18903e-12	-0.535509

## Sheet: F-WntX vs F-SL + F-SH
Gene	pct.1	pct.2	p_val_adj	Log2FoldChange
Wif1	0.625	0.006	0	3.65802
Prg4	0.629	0.072	0	3.5924
Dkk3	0.936	0.081	0	3.32
1500015O10Rik	0.682	0.025	0	2.96945
Clu	0.474	0.01	0	2.59492
Apoe	0.998	0.738	0	2.47466
Cpe	0.764	0.032	0	2.1238
Csrp2	0.864	0.376	0	2.01495
Lmcd1	0.675	0.012	0	2.00378
Pdlim3	0.741	0.078	0	1.9826
Dbi	0.972	0.819	0	1.85517
Vim	1	0.991	0	1.8228
Ccdc80	1	0.972	0	1.77062
Fxyd6	0.896	0.604	0	1.76017
Tmem176b	0.765	0.128	0	1.75938
Atp1b1	0.515	0.012	0	1.51842
Paqr6	0.475	0.004	0	1.4815
Il11ra1	0.969	0.712	0	1.44968
Cadm1	0.588	0.004	0	1.44479
Rspo3	0.396	0.001	0	1.24388
Serping1	0.868	0.996	0	-1.32678
Lamc1	0.274	0.864	0	-1.83924
Fbln2	0.531	0.915	0	-1.84742
Pcsk6	0.136	0.779	0	-1.9487
Nid1	0.386	0.928	0	-1.97468
Sparcl1	0.492	0.957	0	-1.97997
Lpl	0.435	0.917	0	-2.14698
Igfbp6	0.156	0.818	0	-2.37202
Adamts5	0.231	0.895	0	-2.395
Gpx3	0.416	0.987	0	-2.61812
Clec3b	0.319	0.978	0	-2.78059
Dpep1	0.113	0.923	0	-3.28165
Smoc2	0.256	0.973	0	-3.39073
Ms4a4d	0.166	0.799	8.50725706786292e-318	-1.73402
Entpd2	0.408	0.9	1.10925468633748e-311	-1.53931
Pla1a	0.055	0.678	0	-1.99819
Abi3bp	0.761	0.522	1.45279e-302	1.35219
Fmod	0.391	0.015	4.09221e-302	2.4242
Smim3	0.629	0.109	5.44666e-299	1.31443
Comp	0.392	0.024	8.90897e-297	3.08197
Cpxm2	0.375	0.004	9.49207e-297	0.972864
Rnase4	0.798	0.972	5.25558e-294	-1.21493
Cox4i2	0.522	0.049	6.93484e-292	1.49596
Lamb1	0.127	0.715	2.17928e-283	-1.65739
Itih5	0.748	0.43	1.24807e-282	1.33639
Bambi	0.622	0.111	1.25195e-282	1.33047
Prelp	0.932	0.883	1.79066e-279	1.2171
Timp3	0.969	0.753	2.14205e-277	1.49096
Postn	0.801	0.231	2.35312e-272	2.03164
Prss23	0.087	0.685	3.95958e-272	-1.85205
S100b	0.346	0.004	2.05323e-270	1.05766
Scara3	0.581	0.104	3.03745e-268	1.20695
S100a6	0.993	0.998	5.24691e-268	-0.973423
Map1b	0.681	0.261	2.64157e-262	1.29045
Mdk	0.6	0.114	5.17198e-261	1.38249
Shisa2	0.305	0.001	6.38896e-256	0.780973
Gsta3	0.108	0.693	2.1697e-255	-1.86141
Fth1	1	0.999	8.54197e-254	0.806952
Tmsb10	0.911	0.982	4.86802e-253	-1.06708
Cdc42ep3	0.601	0.121	7.50702e-252	1.38239
Cd9	0.996	0.825	6.85114e-251	1.12693
Hsd11b1	0.188	0.707	5.07237e-248	-2.34117
Vwa1	0.215	0.751	2.51823e-247	-1.52912
Shisa4	0.625	0.154	1.55799e-246	1.14396
Phlda1	0.155	0.718	2.22598e-243	-1.74757
Ogn	0.481	0.913	1.19836e-242	-1.46138
Socs2	0.921	0.645	2.39289e-238	1.15295
Msx1	0.567	0.14	1.9413e-235	1.29978
Pi16	0.509	0.866	2.00208e-235	-2.48221
Serpine2	0.395	0.877	1.44271e-234	-1.37587
Klf4	0.319	0.791	2.50604e-232	-2.16816
Pdgfrl	0.776	0.311	4.3227e-232	1.30862
Tnxb	0.285	0.785	5.60133e-231	-1.45011
Pdgfa	0.414	0.032	3.86458e-230	0.971408
Scara5	0.041	0.566	4.01977e-229	-1.57688
Cytl1	0.302	0.022	3.79189e-228	3.49857
Cyp2e1	0.306	0.006	5.20099e-227	1.10386
Ccl19	0.46	0.052	5.28038e-227	1.30007
Stk17b	0.412	0.037	6.89667e-227	1.05553
Tspan7	0.431	0.042	2.82641e-226	0.977277
Hspg2	0.269	0.742	2.60176e-223	-1.39776
Fam19a5	0.356	0.016	4.24666e-223	0.904746
Htra3	0.881	0.994	1.14384e-222	-0.926313
Dpt	0.994	0.967	7.82261e-219	0.941333
Axl	0.546	0.834	3.1383e-215	-1.37264
Lgmn	0.584	0.222	2.89743e-214	1.14347
Tmem176a	0.54	0.082	2.0516e-213	1.29752
Cdh11	0.34	0.015	2.31892e-212	0.854886
Mfap2	0.701	0.265	1.22305e-210	1.16692
Tst	0.419	0.061	7.17666e-210	1.15395
Tbx20	0.768	0.397	5.15973e-209	1.17154
Acta2	0.469	0.053	3.11663e-208	1.40308
Tgfbi	0.773	0.34	7.12246e-205	1.40927
Spon2	0.056	0.567	1.42824e-204	-1.74434
Lmo4	0.798	0.55	6.49611e-200	1.06538
Oaf	0.566	0.865	1.14848e-199	-1.26198
Tceal3	0.267	0.003	7.37901e-199	0.631399
Ptn	0.638	0.159	1.75719e-194	1.57641
Ifi205	0.031	0.51	7.18206e-194	-1.49099
Anxa3	0.104	0.596	3.98278e-191	-1.66376
Scx	0.256	0.003	4.22726e-191	0.900411
Medag	0.349	0.765	8.48442e-190	-1.27517
Akap12	0.156	0.642	5.48747e-187	-1.30588
Mgp	1	0.981	8.03332e-184	1.64774
Fgl2	0.489	0.121	9.03945e-184	1.42444
Igf1	0.8	0.513	2.32063e-183	1.21132
2010111I01Rik	0.628	0.228	2.1098e-181	0.99803
Frzb	0.682	0.353	1.09391e-180	1.15576
Ptx3	0.387	0.043	2.53724e-180	1.08441
Col4a1	0.235	0.692	2.0305e-179	-1.32164
Serpinf1	0.978	0.912	7.47651e-178	0.996351
Camk2n1	0.405	0.762	2.7294e-174	-1.29115
Abca8a	0.436	0.826	8.31897e-172	-1.22467
Col15a1	0.356	0.776	1.35388e-170	-1.32544
Cd55	0.101	0.541	2.07695e-170	-1.39872
G0s2	0.506	0.841	1.36566e-168	-1.55527
Col8a1	0.228	0.688	1.2941e-163	-1.58091
Cygb	0.749	0.957	2.4799e-163	-0.87551
Ftl1	1	1	3.06536e-162	-0.641829
6330403K07Rik	0.308	0.022	1.07403e-161	0.808347
Ptgfr	0.371	0.048	1.84497e-161	0.872015
Mfap4	0.734	0.398	2.48078e-161	1.81163
Aldh3a1	0.342	0.042	4.87017e-161	0.991353
Tnfaip2	0.035	0.445	2.83709e-158	-1.1755
Gstm1	0.933	0.986	4.23062e-157	-0.908974
Slc43a3	0.572	0.856	6.88637e-154	-1.16005
Jun	0.804	0.907	2.79074e-153	-1.68514
Slc1a5	0.148	0.601	3.52843e-152	-1.1626
Tnfaip8	0.44	0.075	4.20227e-150	0.807044
Nkd1	0.265	0.012	4.57424e-150	0.590104
Ifi27l2a	0.572	0.91	1.42332e-149	-1.13918
Tcf12	0.634	0.276	2.0715e-149	0.90097
Trf	0.685	0.284	1.47955e-148	1.23869
Rasl11b	0.429	0.147	2.43463e-146	0.930387
Art3	0.356	0.045	2.13599e-144	0.813992
Fbn1	0.427	0.722	5.43608e-144	-1.26686
Igfbp4	0.873	0.98	1.5218e-143	-0.775919
Lama2	0.315	0.699	3.94923e-142	-1.06921
Npr1	0.395	0.069	1.43795e-141	0.80761
Olfml2b	0.556	0.179	2.48418e-141	0.927221
Cracr2b	0.258	0.014	3.24772e-141	0.607088
Pde4d	0.288	0.023	1.74226e-140	0.659496
Atf5	0.318	0.67	8.86333e-140	-1.33146
Hist1h2bc	0.76	0.387	4.92538e-139	0.983334
Nt5dc2	0.256	0.035	2.94157e-133	0.861681
6030408B16Rik	0.048	0.422	2.05559e-131	-1.12498
S100a11	0.932	0.972	3.35619e-131	-0.792231
3632451O06Rik	0.276	0.022	5.46446e-130	0.583997
P3h2	0.261	0.018	3.97208e-129	0.568822
Sdc2	0.754	0.916	5.47059e-129	-0.853605
Tagln	0.328	0.047	5.97616e-129	1.16572
Ebf2	0.042	0.418	8.31888e-127	-0.949337
Crispld2	0.702	0.915	1.26282e-126	-1.03619
Spry1	0.191	0.577	3.44538e-126	-1.12944
Zfp385a	0.078	0.442	5.59997e-126	-1.05427
Cp	0.364	0.738	7.65564e-125	-1.0937
Gpsm3	0.027	0.371	9.62826e-123	-0.859339
Ccnd2	0.647	0.318	3.03275e-122	1.05573
Gstm5	0.774	0.478	6.44157e-122	0.83041
Cd59a	0.274	0.031	8.18289e-122	0.619236
Cd34	0.904	0.961	1.03556e-121	-0.894297
Col4a2	0.144	0.527	1.0722e-121	-1.06037
Cald1	0.572	0.851	3.40781e-121	-0.905074
Nav1	0.271	0.639	4.79754e-121	-1.01725
St3gal4	0.641	0.318	4.04002e-120	0.827338
Lims2	0.029	0.376	6.1909e-120	-0.930574
C3	0.198	0.598	8.7143e-119	-1.4567
Cxcl1	0.146	0.513	9.3361e-118	-2.19087
Palld	0.268	0.028	4.29601e-117	0.599151
H2B-EGFP	0.538	0.81	6.92499e-117	-0.957247
Igfbp5	0.414	0.104	2.15093e-116	1.69899
Cd302	0.613	0.834	2.70581e-116	-0.871883
Ngf	0.072	0.448	3.41255e-116	-1.02931
Gnai1	0.286	0.034	1.05581e-114	0.569487
Serpinh1	0.961	0.989	1.38371e-114	-0.724298
Nudt4	0.496	0.171	1.99693e-114	0.764601
Ndufa4l2	0.184	0.581	7.4021e-114	-1.16635
Thbs1	0.485	0.214	4.8555e-112	1.23961
Tm4sf1	0.869	0.682	1.75463e-111	0.866652
Cnn3	0.807	0.564	1.43837e-110	0.741932
Jup	0.147	0.51	5.43244e-109	-0.946683
Id1	0.456	0.141	5.54059e-109	0.922997
Pcolce2	0.545	0.822	6.23802e-107	-1.01919
Acvrl1	0.173	0.528	7.84961e-106	-0.903699
Loxl1	0.796	0.922	1.42251e-105	-0.747065
Kank1	0.252	0.027	2.00371e-105	0.5302
Cdc42ep2	0.136	0.5	5.284e-105	-0.941819
Itm2b	1	0.999	9.10584e-105	0.520779
Ahsg	0.259	0.028	1.19407e-104	0.957312
Ifngr1	0.544	0.796	3.54637e-104	-0.918121
Id3	0.933	0.725	1.28119e-103	0.986024
Cd248	0.039	0.342	3.53589e-103	-1.20982
Tpst1	0.434	0.712	5.96457e-103	-0.864055
Timp1	0.535	0.224	4.90514e-102	1.04175
Col5a3	0.067	0.401	6.72438e-102	-0.928218
Ppp1r14a	0.126	0.475	1.64737e-101	-1.03113
Scn7a	0.175	0.552	1.49576e-100	-0.89888
Celf2	0.441	0.727	7.17486e-99	-0.843932
Pamr1	0.336	0.128	3.60617e-98	0.823497
S100a10	0.899	0.953	5.6718e-98	-0.780311
Ly6a	0.336	0.683	7.60364e-98	-1.49561
Podn	0.047	0.36	1.496e-97	-0.872179
Sdc3	0.525	0.225	3.55514e-96	0.742454
Ppp3ca	0.728	0.459	3.80526e-96	0.695197
Meox1	0.672	0.434	2.83773e-95	1.12213
Mnda	0.024	0.303	3.93076e-95	-0.750076
Gas6	0.789	0.624	7.78952e-95	1.01358
Pcolce	0.948	0.978	7.73969e-94	-0.624373
Heg1	0.254	0.586	2.94877e-93	-0.913142
Srpx2	0.298	0.603	3.67613e-93	-0.91334
Kcnk2	0.025	0.307	1.26215e-92	-0.87104
Lama4	0.241	0.562	7.74008e-92	-0.88355
Pdgfra	0.212	0.551	2.99799e-91	-0.885685
Dpysl3	0.769	0.524	1.03871e-90	0.698862
Wwtr1	0.612	0.314	3.65623e-90	0.689316
Ifi203	0.028	0.312	9.1846e-90	-0.801154
Pcdh19	0.014	0.273	2.09912e-89	-0.690082
Angptl7	0.287	0.09	4.95874e-89	1.75035
Col6a1	0.838	0.931	1.36445e-88	-0.69304
Lum	0.993	0.987	1.93173e-88	0.787978
Cxcl12	0.527	0.314	3.20799e-88	0.864119
C1s1	0.115	0.435	1.02207e-87	-0.963801
Cd200	0.34	0.085	2.90953e-87	0.680951
Fibin	0.567	0.667	3.47911e-87	0.610208
Uap1	0.424	0.629	4.11503e-87	-0.921255
Cxcl14	0.042	0.305	1.99357e-86	-2.69144
Man1a	0.147	0.463	2.40004e-86	-0.837749
Nnmt	0.245	0.584	2.99244e-86	-0.843365
Marcksl1	0.26	0.043	4.40864e-86	0.607618
Cyb5a	0.919	0.963	6.72356e-86	-0.617629
Fam3c	0.581	0.297	1.33329e-85	0.694596
Rbp1	0.969	0.883	3.10073e-85	0.706705
Cd47	0.719	0.858	2.4337e-83	-0.676282
Clec11a	0.301	0.065	5.37343e-83	0.7021
Olfml3	0.884	0.798	1.05665e-82	0.739245
Lrrn4cl	0.041	0.314	1.19605e-82	-0.882027
Gfpt2	0.239	0.466	1.26205e-82	-1.03864
Csrp1	0.753	0.455	4.00871e-82	0.691656
Vstm4	0.273	0.05	5.13925e-82	0.540343
Sept8	0.195	0.476	1.20371e-81	-0.760194
Selenbp1	0.512	0.734	3.06405e-81	-0.912757
Lsp1	0.512	0.673	2.09722e-80	-0.79626
Tek	0.035	0.303	2.65819e-79	-0.690076
Rbms1	0.5	0.744	5.02984e-79	-0.741263
Aldh1a1	0.886	0.694	1.16237e-78	0.738262
Tmsb4x	0.999	0.993	1.22263e-78	0.681467
Tgfb3	0.544	0.267	1.32274e-78	0.655853
AW112010	0.046	0.317	3.56395e-78	-0.779766
Etv1	0.488	0.186	4.06822e-78	0.648688
Pmp22	0.889	0.951	4.99471e-78	-0.607092
H2-D1	0.868	0.96	5.40401e-78	-0.62577
Islr	0.594	0.761	7.83941e-78	-0.77482
Rin2	0.46	0.206	9.41696e-78	0.656327
Drap1	0.593	0.769	1.95975e-77	-0.710442
Svep1	0.035	0.298	4.59239e-76	-0.746562
Rem1	0.126	0.41	6.57712e-76	-0.801274
Ace	0.446	0.696	1.32212e-75	-0.775842
Mfap5	0.789	0.925	1.81132e-74	-0.963779
Errfi1	0.105	0.366	3.61264e-74	-0.853178
Efhd1	0.04	0.291	4.29857e-74	-0.922844
Pgf	0.16	0.456	2.60357e-73	-0.970154
Unc5b	0.367	0.109	2.77125e-73	0.590345
Eln	0.361	0.657	3.32559e-73	-1.03248
Cfh	0.971	0.915	4.67601e-73	0.689082
Xpnpep1	0.395	0.241	7.58595e-73	0.527309
Bmyc	0.509	0.267	9.91017e-73	0.65747
Ptgis	0.876	0.796	1.11181e-72	0.610968
Hspa1a	0.234	0.369	1.25158e-72	-1.32171
Fam26e	0.288	0.069	1.64084e-72	0.546565
4930523C07Rik	0.668	0.405	6.54886e-72	0.629004
Cd44	0.285	0.067	1.09181e-71	0.521837
Ar	0.106	0.394	2.07629e-71	-0.754363
Thbd	0.081	0.364	3.04698e-71	-0.807745
Nmb	0.075	0.313	1.6894e-70	-1.00821
Sfrp2	0.305	0.178	1.8255e-70	1.34972
Dusp1	0.546	0.752	3.04873e-70	-1.19088
Pdzd2	0.086	0.36	5.82732e-70	-0.747254
Jund	0.947	0.97	2.11046e-69	-0.771031
Ddah2	0.715	0.843	2.70414e-69	-0.630164
Ly6e	0.608	0.846	6.80147e-69	-0.693926
Bok	0.452	0.282	1.83915e-68	0.65646
Prex2	0.069	0.321	3.1276e-68	-0.709032
Aldh1a2	0.042	0.286	5.07895e-68	-0.761433
Gata6	0.599	0.321	1.08753e-67	0.608249
Nfix	0.836	0.636	4.61815e-67	0.598652
Sh3bp5	0.142	0.42	7.70899e-67	-0.723171
Emp2	0.622	0.358	1.35112e-66	0.619
Wfdc1	0.34	0.096	1.18949e-65	0.534254
Mat2a	0.56	0.716	1.80656e-65	-0.719642
Ggt5	0.035	0.266	1.95675e-65	-0.711823
Maged2	0.736	0.521	3.19692e-65	0.694555
Myoc	0.488	0.27	3.88966e-65	1.16189
Vgll3	0.045	0.287	4.86164e-64	-0.647294
Marcks	0.551	0.737	1.33865e-63	-0.747767
Adm	0.059	0.3	1.34756e-63	-1.08733
Tcf4	0.844	0.916	2.41299e-63	-0.603151
C4b	0.262	0.063	2.21625e-62	0.742667
Ifit3	0.278	0.111	1.34764e-61	0.744558
Nrxn2	0.062	0.309	5.34012e-61	-0.672817
Cndp2	0.115	0.374	6.87735e-61	-0.638747
Epdr1	0.402	0.143	1.1652e-60	0.523151
Atf4	0.388	0.628	1.16983e-60	-0.715086
Hmgn2	0.539	0.276	1.2846e-60	0.601107
Klf6	0.361	0.599	2.00638e-60	-0.87154
H2-K1	0.596	0.794	3.42025e-60	-0.700035
Ebf1	0.648	0.826	4.08593e-60	-0.738701
Angptl2	0.519	0.715	5.83878e-60	-0.720343
Socs3	0.292	0.532	3.31234e-59	-1.06343
Tubb5	0.892	0.778	3.94022e-59	0.576302
Neat1	0.565	0.749	5.0644e-59	-0.798463
Ly6c1	0.056	0.268	5.50184e-58	-1.05764
P4ha1	0.271	0.48	1.05177e-57	-0.623759
Foxp2	0.475	0.207	1.27927e-57	0.571529
Limch1	0.401	0.146	2.77982e-57	0.549046
Ctsh	0.455	0.196	6.16991e-57	0.605943
Mpzl1	0.493	0.221	1.7167e-56	0.551603
Lmna	0.895	0.753	4.55273e-56	0.537342
Actn1	0.329	0.111	6.89163e-56	0.509756
Sptbn1	0.834	0.894	7.1188e-56	-0.52925
Col6a2	0.755	0.844	7.54742e-56	-0.575773
Prnp	0.748	0.564	8.92806e-56	0.560597
Bicc1	0.544	0.77	2.46184e-55	-0.629955
Emp1	0.669	0.785	3.70705e-55	-0.645886
Spats2l	0.395	0.163	4.34505e-55	0.53366
Tmem45a	0.576	0.416	8.36466e-55	0.502332
Rap1a	0.606	0.727	1.4845e-54	-0.550785
Fbln1	0.953	0.87	3.30965e-54	0.610742
Gnb4	0.498	0.249	4.72075e-54	0.564309
Rarres2	0.907	0.97	7.32088e-54	-0.532532
Ltbp4	0.862	0.916	7.92311e-54	-0.502087
Papss2	0.332	0.122	1.40136e-53	0.521155
Il33	0.427	0.236	2.79682e-53	0.7361
Cntfr	0.287	0.081	3.90089e-53	0.515621
Dbn1	0.225	0.428	4.64999e-53	-0.628683
Ifi27	0.939	0.801	5.91336e-53	0.511676
Tmem159	0.319	0.514	6.18303e-53	-0.589944
Itgb5	0.412	0.633	6.92748e-53	-0.642829
Cyp27a1	0.184	0.413	1.25339e-52	-0.655349
Crip1	0.971	0.983	1.66971e-52	-0.66237
Abca6	0.094	0.302	2.22872e-52	-0.601591
Glipr2	0.264	0.501	3.4443e-52	-0.631724
Rnpep	0.451	0.199	3.56093e-52	0.527903
Ackr3	0.062	0.277	5.29661e-52	-0.629481
Ugp2	0.601	0.705	8.78278e-52	-0.625486
Apbb1ip	0.104	0.351	1.13114e-51	-0.585269
Tubb6	0.299	0.532	2.00204e-51	-0.698818
Aprt	0.569	0.306	2.10547e-50	0.528292
Sept11	0.311	0.545	3.01866e-50	-0.645176
Pfn1	0.378	0.645	3.56562e-50	-0.697885
Comt	0.565	0.711	6.95262e-50	-0.542837
Sfxn1	0.221	0.457	1.17311e-49	-0.627522
Cyb5r3	0.714	0.487	2.12712e-49	0.543068
Antxr2	0.119	0.338	2.49818e-49	-0.572607
Meis2	0.504	0.271	3.17149e-49	0.544968
Klf2	0.669	0.795	3.48382e-49	-1.00678
Sulf1	0.238	0.453	3.51038e-49	-0.613483
Msc	0.078	0.295	2.0027e-48	-0.699735
Myh10	0.438	0.198	5.15748e-48	0.51282
Carhsp1	0.322	0.537	7.26267e-48	-0.643028
Mt1	0.422	0.658	8.90172e-48	-0.981466
Fam111a	0.059	0.265	1.00887e-47	-0.533969
Col6a3	0.44	0.592	1.0272e-47	-0.640784
C1ra	0.224	0.46	2.21062e-47	-0.675119
Ahnak	0.761	0.828	4.87694e-47	-0.538711
Ypel3	0.726	0.829	6.87104e-47	-0.536834
Colec12	0.672	0.449	3.00982e-46	0.546506
Fn1	0.087	0.307	6.0379e-46	-0.686211
Nbl1	0.347	0.581	1.22275e-45	-0.805279
Xdh	0.075	0.286	2.17887e-45	-0.558888
Fyn	0.2	0.417	3.21056e-45	-0.567482
Agap1	0.061	0.262	5.68154e-45	-0.508073
Tril	0.099	0.323	6.27174e-45	-0.549158
Pls3	0.629	0.416	6.90341e-45	0.512337
Pdlim2	0.691	0.804	1.48835e-44	-0.531105
Ces1d	0.181	0.396	6.04168e-44	-0.782426
Ak1	0.462	0.223	1.20168e-43	0.501548
Kdelr3	0.474	0.631	1.41355e-43	-0.555373
C1qtnf2	0.306	0.544	1.46901e-43	-0.608658
Ssh2	0.118	0.317	6.88599e-43	-0.575026
Fos	0.818	0.867	8.93313e-43	-0.875147
Cilp	0.264	0.141	5.00725e-42	1.25091
Junb	0.838	0.901	1.6798e-41	-0.841718
Hn1	0.525	0.656	1.77105e-41	-0.587614
Plpp1	0.786	0.638	2.31676e-41	0.509759
Ubl3	0.405	0.592	9.50975e-41	-0.532248
Tcf21	0.088	0.286	3.26958e-40	-0.51854
Arap1	0.135	0.337	6.9034e-40	-0.547834
Tgm2	0.139	0.334	3.85224e-39	-0.520202
1700025G04Rik	0.127	0.337	3.64695e-38	-0.513056
Heyl	0.239	0.441	4.48396e-38	-0.647879
Vit	0.366	0.161	8.56148e-38	0.537486
Txnip	0.555	0.717	2.94056e-37	-0.604813
Jade1	0.245	0.434	3.58723e-37	-0.541803
Fosb	0.339	0.522	5.20196e-36	-0.781115
Enpp2	0.334	0.535	6.35538e-36	-0.647847
Atp1a2	0.436	0.575	1.36349e-35	-0.540259
Serpine1	0.131	0.289	1.58583e-35	-0.996216
Ltbp1	0.174	0.375	1.77787e-35	-0.531931
Vcam1	0.609	0.49	1.84142e-35	0.63607
Pdlim1	0.268	0.485	5.56993e-35	-0.527321
Creb5	0.22	0.397	8.19773e-35	-0.56221
Gpc6	0.334	0.549	2.24796e-34	-0.552533
Col4a4	0.148	0.341	3.08289e-34	-0.515321
Hist1h1c	0.48	0.279	4.72317e-34	0.619366
F3	0.167	0.355	1.53997e-33	-0.579395
Col5a1	0.333	0.503	1.6191e-33	-0.513866
Il17d	0.145	0.33	3.32426e-33	-0.504187
Gstm2	0.293	0.516	5.23833e-33	-0.516359
Aspn	0.46	0.67	1.55563e-32	-0.576974
Egr1	0.716	0.802	1.99995e-31	-0.670461
Hic1	0.244	0.437	6.15771e-31	-0.529108
Cst3	1	0.996	3.34853e-30	0.541199
Btg2	0.554	0.66	2.94382e-29	-0.829533
Mafb	0.533	0.328	1.96204e-28	0.525062
Mmp14	0.371	0.524	1.10858e-27	-0.503149
Ccnd1	0.259	0.413	6.62923e-27	-0.576734
Dnajb1	0.229	0.304	5.73645e-26	-0.609904
Zfp36	0.364	0.511	1.96071e-25	-0.706259
Fmo2	0.168	0.358	4.24411e-25	-0.518376
Hspb1	0.656	0.714	6.35756e-25	-0.537827
Ier2	0.773	0.822	4.5041e-13	-0.546409

## Sheet: F-Act vs F-SL + F-SH
Gene	pct.1	pct.2	p_val_adj	Log2FoldChange
Postn	0.743	0.231	0	2.71342
Timp1	0.708	0.224	0	2.30903
Cilp	0.566	0.141	0	2.12481
Prg4	0.461	0.072	0	2.08595
Col8a1	0.921	0.688	0	1.74229
Meox1	0.785	0.434	0	1.4089
Csrp2	0.752	0.376	0	1.23061
Fstl1	0.994	0.915	0	1.05251
Emp1	0.958	0.785	0	0.96174
Mfap5	0.988	0.925	0	0.934478
Tagln2	0.96	0.824	0	0.917939
Sparc	1	0.997	0	0.896411
Lgals1	1	0.992	0	0.84869
Sh3bgrl3	0.867	0.64	0	0.812427
Bgn	1	0.991	0	0.681562
Arpc1b	0.993	0.948	0	0.645989
Malat1	1	1	0	-0.555716
Htra3	0.941	0.994	0	-0.674495
Gsn	1	1	0	-0.821149
Adamts5	0.731	0.895	0	-0.991378
Gstm1	0.883	0.986	0	-1.17816
Dpep1	0.735	0.923	0	-1.20188
Clec3b	0.682	0.978	0	-1.42831
Lpl	0.692	0.917	0	-1.51154
Ldha	0.934	0.791	7.59576523916332e-320	0.805635
Col3a1	0.991	0.977	7.31594521646986e-310	0.980824
Ctgf	0.455	0.128	3.76583e-293	0.954285
Crlf1	0.338	0.066	1.24939e-286	1.1551
Col1a1	0.987	0.947	5.45462e-284	0.745811
Slc25a5	0.828	0.589	3.98792e-278	0.767898
Fxyd6	0.809	0.604	4.16405e-274	0.88558
G0s2	0.574	0.841	1.25917e-273	-1.08241
Tnfrsf12a	0.575	0.246	1.77194e-273	0.883679
Rbp1	0.95	0.883	7.54406e-265	0.78185
Ogn	0.8	0.913	1.01832e-261	-0.858358
Igfbp7	1	0.999	4.44022e-258	0.509483
Fxyd5	0.781	0.51	2.09161e-257	0.78681
Mfap4	0.718	0.398	8.53887e-257	1.33028
Col5a2	0.808	0.548	2.20662e-256	0.764056
F2r	0.675	0.371	2.58686e-256	0.769591
Sepp1	0.914	0.971	1.35808e-249	-0.655933
Rps29	0.996	0.998	3.85118e-247	-0.612953
Crispld2	0.803	0.915	8.39218e-246	-0.855709
Cyb5r3	0.767	0.487	1.0387e-245	0.725427
Tpm4	0.936	0.796	1.08022e-245	0.680769
Myl12a	0.987	0.952	1.03923e-244	0.586391
Ltbp2	0.307	0.055	8.82287e-242	0.747105
Aldh2	0.84	0.92	1.18372e-238	-0.688457
Pcsk6	0.595	0.779	2.32562e-237	-0.839886
Anxa2	0.972	0.907	3.59648e-232	0.675814
Cst6	0.37	0.102	7.36378e-232	1.09399
Txnip	0.489	0.717	6.89987e-226	-0.866976
Ces1d	0.107	0.396	3.26254e-225	-0.999677
Col1a2	0.994	0.984	1.9694e-221	0.613992
Capg	0.803	0.584	4.63487e-221	0.686636
Serpina3n	0.453	0.19	3.77155e-218	0.959769
Fhl2	0.432	0.155	1.13468e-216	0.825466
Vim	0.998	0.991	1.71284e-216	0.56695
Actn1	0.378	0.111	2.55923e-216	0.621583
Ckb	0.873	0.74	4.99456e-215	0.766508
Fbln1	0.704	0.87	2.26919e-209	-0.808861
Smoc2	0.921	0.973	4.3083e-208	-0.753436
Gas1	0.751	0.914	3.27021e-207	-0.799839
Enpp2	0.235	0.535	2.29125e-206	-0.892063
Vcan	0.775	0.502	1.10552e-203	0.671844
Gsta3	0.416	0.693	6.38315e-202	-0.916391
Rps21	0.949	0.969	2.43843e-201	-0.555237
Rnase4	0.952	0.972	1.23783e-197	-0.504948
Tspo	0.97	0.91	6.72519e-197	0.55201
Tm4sf1	0.864	0.682	1.12658e-195	0.687484
Msn	0.741	0.489	4.69006e-195	0.609931
Acta2	0.275	0.053	2.34678e-194	1.00319
Nid1	0.858	0.928	7.45882e-194	-0.601832
Tagln	0.252	0.047	6.06682e-192	0.888651
Hsd11b1	0.477	0.707	3.72908e-190	-1.09748
Kctd11	0.423	0.167	1.48127e-188	0.595004
Vamp5	0.584	0.327	8.72568e-187	0.625648
Htra1	0.467	0.706	1.4153e-186	-0.767807
Sec61b	0.913	0.778	4.69192e-186	0.550007
Prss23	0.471	0.685	5.37533e-186	-0.840412
Rarres2	0.927	0.97	3.49038e-181	-0.559233
Ak1	0.518	0.223	9.58872e-181	0.585922
Maff	0.468	0.191	1.63108e-180	0.607421
Tubb5	0.898	0.778	4.18162e-179	0.609376
Mical2	0.383	0.127	1.06416e-177	0.5538
Adamts2	0.845	0.627	1.53337e-176	0.583967
Dpysl3	0.754	0.524	2.62141e-172	0.588646
Apoe	0.586	0.738	3.83107e-172	-1.64889
Atp1a2	0.351	0.575	3.1915e-170	-0.745132
Calm1	0.984	0.925	3.30107e-168	0.500553
Acaa2	0.34	0.5	1.27659e-165	-0.628198
Lox	0.351	0.119	2.18545e-164	0.628116
Lmna	0.905	0.753	2.69523e-163	0.540605
Glul	0.431	0.629	1.47412e-161	-0.732761
Nme1	0.753	0.56	1.72049e-161	0.530096
Tmsb4x	0.999	0.993	3.18992e-161	0.502939
Scara5	0.303	0.566	1.14252e-160	-0.779328
Ier3	0.53	0.266	1.5783e-159	0.768271
Tubb2b	0.423	0.164	2.64565e-159	0.559097
Igfbp4	0.938	0.98	3.29011e-157	-0.511631
Cyp27a1	0.195	0.413	9.30465e-157	-0.645894
Camk2n1	0.611	0.762	3.28748e-155	-0.658743
Aldh1a2	0.413	0.286	4.61758e-155	0.766366
Nmb	0.098	0.313	2.09422e-154	-0.904209
Ptp4a1	0.732	0.513	3.52144e-149	0.547497
Pfn1	0.366	0.645	3.52802e-145	-0.566847
Thbs1	0.453	0.214	4.14059e-145	0.79559
Pmepa1	0.678	0.421	2.21274e-144	0.551565
Dap	0.887	0.735	3.81012e-142	0.50256
Lbh	0.488	0.235	5.95974e-141	0.524741
Tpst1	0.616	0.712	9.49522e-135	-0.506607
Ramp2	0.622	0.745	2.69677e-127	-0.557821
Cd9	0.927	0.825	1.07944e-126	0.603042
Tnxb	0.645	0.785	2.07372e-126	-0.550405
Klf9	0.668	0.785	3.59091e-126	-0.577247
Ppic	0.808	0.602	5.03965e-126	0.502206
Timp3	0.542	0.753	1.97382e-121	-0.533148
Islr	0.618	0.761	2.56524e-121	-0.553143
Slc43a3	0.783	0.856	9.60086e-121	-0.543692
H2B-EGFP	0.708	0.81	1.88675e-120	-0.527002
Lamb1	0.55	0.715	6.33716e-120	-0.574301
Sept4	0.162	0.34	1.55296e-117	-0.659257
Fbn1	0.878	0.722	1.71313e-114	0.50181
Selenbp1	0.561	0.734	9.84478e-114	-0.61658
Pam	0.882	0.763	1.56887e-113	0.519626
Aspn	0.847	0.67	1.34805e-112	0.655814
Hist1h2bc	0.603	0.387	9.14564e-108	0.534521
Gstt1	0.442	0.584	1.26093e-107	-0.529316
Igf1	0.706	0.513	1.97397e-107	0.553951
Serpine1	0.524	0.289	6.73703e-103	0.648362
Ms4a4d	0.676	0.799	1.00275e-102	-0.51139
C3	0.409	0.598	4.0105e-100	-0.741541
Pid1	0.378	0.512	2.5391e-99	-0.51599
Fibin	0.782	0.667	2.26728e-98	0.572441
Ebf1	0.766	0.826	3.63969e-96	-0.503419
Tubb3	0.263	0.094	3.37825e-95	0.518541
Ppp1r14a	0.315	0.475	5.15642e-94	-0.57494
Cyr61	0.713	0.495	3.97144e-92	0.53215
Ggt5	0.104	0.266	3.17662e-90	-0.523175
Apod	0.417	0.25	5.17007e-89	0.773095
Adamtsl2	0.418	0.226	8.33402e-88	0.531762
Ly6a	0.847	0.683	3.85756e-85	0.606007
Aldh1a1	0.603	0.694	4.88384e-85	-0.519017
Pla1a	0.577	0.678	5.05186e-82	-0.507534
Mt2	0.476	0.302	9.88569e-81	0.786138
Hes1	0.523	0.652	1.35883e-80	-0.565778
Ifi205	0.359	0.51	3.81036e-67	-0.54104
Efhd1	0.19	0.291	2.03549e-63	-0.507586
Fmo2	0.23	0.358	3.1389e-60	-0.501668
Adm	0.182	0.3	4.39637e-50	-0.614665
Btg2	0.617	0.66	2.14075e-40	-0.527994
Cxcl14	0.224	0.305	8.11639e-40	-1.08993
Ccl7	0.274	0.189	7.65921e-31	0.838699
Cxcl1	0.465	0.513	2.62616e-29	-0.56946

## Sheet: F-Cyc vs F-SL + F-SH
Gene	pct.1	pct.2	p_val_adj	Log2FoldChange
Timp1	0.945	0.224	0	4.54027
Spp1	0.497	0.007	0	3.75666
Acta2	0.756	0.053	0	3.15605
Stmn1	0.782	0.03	0	2.75179
H2afz	0.989	0.712	0	2.50137
Cthrc1	0.655	0.047	0	2.39125
Cenpa	0.625	0.026	0	2.25165
Cks2	0.685	0.037	0	2.13798
Tpm2	0.876	0.229	0	1.89642
Csrp2	0.924	0.376	0	1.88966
Ran	0.99	0.698	0	1.87783
2700094K13Rik	0.885	0.244	0	1.7937
Hmgn2	0.889	0.276	0	1.78034
Slc25a5	0.983	0.589	0	1.77762
Ccnb2	0.619	0.01	0	1.70773
Ldha	0.986	0.791	0	1.62379
Birc5	0.569	0.005	0	1.61801
Hmgb2	0.655	0.218	0	1.59655
Lox	0.77	0.119	0	1.57812
Tagln2	0.991	0.824	0	1.5753
Ube2s	0.951	0.56	0	1.57489
Mif	0.917	0.582	0	1.57472
2810417H13Rik	0.593	0.002	0	1.54983
Hnrnpa1	0.974	0.426	0	1.54419
Eno1	0.918	0.492	0	1.51706
Rbm3	0.984	0.668	0	1.45411
Tpm4	0.987	0.796	0	1.43001
Actn1	0.825	0.111	0	1.41989
Tnc	0.556	0.01	0	1.4177
Pkm	0.976	0.805	0	1.40001
Lgals1	0.999	0.992	0	1.39845
Nme1	0.953	0.56	0	1.38825
Cdca8	0.497	0.007	0	1.33819
Lrrc59	0.917	0.365	0	1.33799
Cdca3	0.572	0.003	0	1.31587
Eif5a	0.993	0.902	0	1.31208
Npm1	0.986	0.828	0	1.3003
Ranbp1	0.981	0.645	0	1.29601
Erh	0.987	0.685	0	1.28778
Tpx2	0.45	0.004	0	1.18584
Hmmr	0.422	0	0	1.12198
Ppia	0.999	0.994	0	1.09798
Knstrn	0.509	0.006	0	1.09682
Spc24	0.602	0.006	0	1.09152
Wisp1	0.503	0.009	0	1.03951
Rps2	0.997	0.997	0	1.03922
Racgap1	0.458	0.004	0	1.03153
Mki67	0.425	0.001	0	0.958462
Cenpm	0.559	0.006	0	0.906701
Hmgb3	0.568	0.015	0	0.862534
Zbtb20	0.909	0.977	0	-1.34648
Dpt	0.864	0.967	0	-1.46475
Nid1	0.802	0.928	0	-1.49801
Itm2b	0.991	0.999	0	-1.49828
Rarres2	0.851	0.97	0	-1.51397
Ltbp4	0.664	0.916	0	-1.54811
Aldh2	0.802	0.92	0	-1.57498
Rnase4	0.856	0.972	0	-1.68241
Gpx3	0.94	0.987	0	-1.8293
Entpd2	0.45	0.9	0	-1.89339
Malat1	0.991	1	0	-1.93874
Smoc2	0.825	0.973	0	-1.94884
Cfh	0.677	0.915	0	-1.95624
Igfbp4	0.797	0.98	0	-1.95885
Sepp1	0.727	0.971	0	-2.03069
Sparcl1	0.621	0.957	0	-2.08767
Dcn	0.999	1	0	-2.2588
Serping1	0.848	0.996	0	-2.29324
Crispld2	0.489	0.915	0	-2.45021
Dpep1	0.598	0.923	0	-2.62743
Gstm1	0.599	0.986	0	-2.82856
Htra3	0.708	0.994	0	-2.86179
Clec3b	0.182	0.978	0	-3.69719
Gsn	0.963	1	0	-3.89709
Cks1b	0.807	0.226	2.0508566145741e-318	1.29556
Mmp2	0.668	0.921	4.32199042108393e-317	-1.71658
Cdc20	0.463	0.011	8.01429190384122e-316	1.7156
Pgam1	0.964	0.607	3.45949127817694e-315	1.22579
Kif20a	0.427	0.002	3.24089275035905e-314	0.881915
Anp32b	0.974	0.599	5.90074250150091e-312	1.23285
Fkbp11	0.736	0.138	0	1.36215
Ogn	0.685	0.913	0	-1.83457
Jund	0.908	0.97	1.08095e-307	-1.77546
Fbln1	0.478	0.87	1.5557e-307	-2.08293
Postn	0.879	0.231	6.75867e-307	2.47964
Ddx39	0.797	0.142	7.36969e-307	1.05924
Nt5dc2	0.566	0.035	2.34634e-304	0.723853
Tk1	0.411	0.002	1.55959e-302	0.90224
Ccna2	0.407	0.002	7.945e-301	1.08802
Fxyd1	0.675	0.877	6.56698e-299	-1.35366
Tacc3	0.499	0.019	5.88159e-295	0.933681
Tagln	0.582	0.047	2.68069e-291	1.78944
Cenpf	0.411	0.003	8.60865e-291	1.19155
Steap1	0.397	0.002	1.5171e-290	0.6022
Tnxb	0.227	0.785	1.74359e-286	-1.81989
Hspd1	0.908	0.468	2.84667e-285	1.18838
Cdkn3	0.425	0.007	2.09253e-282	0.780576
Cd34	0.805	0.961	3.39118e-282	-1.42979
Vmp1	0.92	0.371	5.40228e-282	1.18567
Eef1g	0.993	0.931	6.77572e-282	1.10465
Ccnb1	0.382	0.001	1.06177e-281	1.05759
Anapc15	0.527	0.042	8.47223e-281	0.53488
Gapdh	0.991	0.879	8.64988e-281	1.19567
Pabpc1	0.994	0.736	8.29312e-280	1.10773
Abca8a	0.372	0.826	2.29897e-279	-1.77778
Gsto1	0.622	0.07	2.55547e-278	0.824037
Nuf2	0.368	0.001	1.7435e-275	0.722195
Tyms	0.662	0.105	1.34181e-274	0.976151
Ckap4	0.94	0.459	1.29476e-273	1.22818
Tubb5	0.971	0.778	1.81064e-273	1.30685
Hn1l	0.524	0.039	7.0494e-273	0.550191
Sec61b	0.977	0.778	8.2115e-269	1.10054
Lum	0.948	0.987	1.54432e-268	-1.30902
Lpl	0.736	0.917	9.66307e-267	-1.94505
Adamts5	0.657	0.895	2.37973e-266	-1.68711
Lmnb1	0.536	0.041	5.14405e-266	0.787605
Ckap2	0.382	0.003	7.9163e-266	0.897272
Pmf1	0.522	0.037	9.27685e-266	0.645299
Gas1	0.635	0.914	1.03726e-263	-1.82971
Cd302	0.746	0.834	1.96769e-263	-1.18924
Ypel3	0.506	0.829	6.92619e-262	-1.49276
Pcsk6	0.302	0.779	2.49335e-260	-1.8181
Slc16a3	0.555	0.067	7.14218e-260	1.15976
Calm1	0.999	0.925	1.52879e-259	0.982847
Gpx7	0.93	0.531	1.89532e-257	1.17147
Cygb	0.853	0.957	2.6687e-256	-1.32421
mt-Nd2	0.968	0.98	5.78142e-254	-1.07553
Fn1	0.856	0.307	3.10076e-253	1.71134
Acot7	0.733	0.146	4.93826e-253	0.720161
Lamc1	0.757	0.864	7.36473e-253	-1.19438
Psap	0.927	0.939	1.37122e-251	-1.07225
Camk2n1	0.341	0.762	2.36013e-251	-1.7228
H2afx	0.629	0.122	3.17937e-251	0.949351
Lmna	0.987	0.753	2.77389e-250	1.11543
Islr	0.343	0.761	3.84393e-250	-1.67487
Ube2c	0.335	0.001	4.4146e-250	1.08968
Tuba1c	0.593	0.079	4.09456e-249	0.848366
Igfbp6	0.44	0.818	6.3789e-248	-2.06814
Cpq	0.491	0.807	2.59225e-247	-1.43568
Ckap2l	0.356	0.003	1.07388e-246	0.721479
Smc2	0.52	0.057	2.01767e-246	1.06595
Cald1	0.99	0.851	5.28712e-246	1.07129
Diaph3	0.362	0.004	1.47946e-245	0.569962
Ccl9	0.345	0.003	1.14622e-243	1.05698
Tubb6	0.918	0.532	3.34486e-243	1.29679
Cst3	0.993	0.996	6.68054e-243	-1.45348
Pi16	0.522	0.866	1.86439e-241	-2.7131
Cdk1	0.348	0.004	6.19155e-241	0.915254
Sdc1	0.651	0.119	1.49612e-240	1.07323
Ybx1	1	0.959	9.4094e-240	0.838639
Cenpe	0.332	0.001	1.26464e-239	0.828381
Mad2l1	0.454	0.026	2.94508e-239	0.634476
Prelp	0.562	0.883	3.48216e-239	-1.35197
Cenpw	0.427	0.019	7.51147e-239	0.601656
Bcat1	0.555	0.062	2.66141e-238	0.684755
Rplp0	0.999	0.999	7.21884e-238	0.814911
Plk1	0.319	0.001	1.62946e-237	0.651692
Fam64a	0.316	0	2.9605e-237	0.898008
Cycs	0.944	0.463	1.82659e-236	1.07411
Loxl3	0.716	0.196	2.03706e-236	1.06791
Marcksl1	0.509	0.043	3.72343e-236	0.868977
Cox5a	0.971	0.634	1.21097e-235	0.99801
Pbk	0.316	0.001	1.40554e-235	0.918768
Rpsa	0.997	0.989	1.69057e-232	0.80334
Tpi1	0.947	0.58	1.79116e-232	1.09276
Kif23	0.307	0	4.48628e-232	0.652762
Lockd	0.484	0.047	1.75494e-231	0.928401
Hmgn1	0.991	0.813	1.59317e-229	0.953594
G0s2	0.399	0.841	2.36351e-229	-2.07965
Haus7	0.55	0.069	2.64404e-228	0.601711
Smc4	0.743	0.263	3.8749e-228	1.0274
Anln	0.353	0.006	1.53903e-227	0.664564
Cfl1	0.996	0.882	3.728e-226	0.912512
Nucks1	0.909	0.476	5.00221e-226	0.988181
Ctps	0.576	0.087	8.9384e-225	0.610845
Pmp22	0.902	0.951	1.36611e-224	-1.01418
Ramp2	0.563	0.745	3.72198e-224	-1.26276
Tspan6	0.67	0.157	6.68447e-224	0.561816
Ncl	0.967	0.667	1.6021e-222	1.07419
Fscn1	0.81	0.252	9.20721e-222	1.06916
Tnfrsf12a	0.813	0.246	1.18714e-221	1.12626
Pabpc4	0.655	0.141	3.85518e-221	0.56495
Palld	0.45	0.028	4.84117e-220	0.66841
Rrm1	0.553	0.08	6.29212e-220	0.74021
Crlf1	0.527	0.066	1.24061e-218	1.41553
Selenbp1	0.32	0.734	1.41409e-218	-1.72099
Kif22	0.319	0.003	5.15983e-218	0.632427
Nudt5	0.703	0.189	1.5591e-217	0.507215
Serp1	0.96	0.578	1.02911e-215	1.04596
Rps6	0.999	0.994	9.51086e-215	0.807762
Plod2	0.728	0.191	2.53112e-214	0.686597
Dut	0.737	0.205	4.66918e-214	0.918379
Kpnb1	0.784	0.216	6.19295e-214	0.741095
Pbdc1	0.767	0.235	6.98892e-214	0.538502
Col1a1	0.976	0.947	1.44084e-213	1.30067
Kif2c	0.279	0	3.75789e-212	0.543571
Ssr2	0.971	0.675	1.1106e-211	0.993916
Fhl2	0.717	0.155	2.08505e-211	0.94983
Gsta3	0.152	0.693	1.12666e-210	-1.90661
Rrm2	0.386	0.018	5.57968e-210	0.838159
Tprgl	0.73	0.749	8.02099e-210	-0.855627
Klf9	0.647	0.785	1.00698e-209	-1.25463
Apex1	0.609	0.126	4.8264e-209	0.541411
Actg1	0.996	0.979	1.1578e-208	1.19299
Asf1b	0.32	0.005	1.13005e-207	0.562699
Txn1	0.99	0.846	1.45095e-207	0.910436
Hspe1	0.97	0.71	5.24816e-206	0.995561
Lrp1	0.809	0.848	5.26922e-206	-1.02139
Fam129b	0.58	0.117	2.56388e-205	0.502076
Ecscr	0.384	0.016	5.75571e-205	0.567909
Ak2	0.651	0.158	7.21881e-205	0.524182
Nudt21	0.845	0.272	1.36059e-204	0.76449
Ltbp2	0.497	0.055	2.36986e-204	0.671507
Myl12a	0.997	0.952	2.97227e-204	0.852877
Slc43a3	0.71	0.856	4.57829e-204	-1.32084
Snrpa1	0.782	0.224	1.67739e-203	0.70946
Ms4a4d	0.635	0.799	8.33571e-203	-1.23022
Eef1e1	0.591	0.12	9.08722e-203	0.586692
Ubl4a	0.761	0.224	1.34954e-202	0.595176
Rsrp1	0.947	0.949	1.55691e-201	-0.96005
Ass1	0.496	0.056	2.27683e-201	0.923076
Mxd3	0.28	0.001	4.45347e-201	0.598909
Klf4	0.529	0.791	1.20012e-200	-2.06989
Angptl4	0.583	0.131	9.75824e-200	1.15494
Hmgb1	0.993	0.9	6.80509e-199	0.989103
Runx1	0.395	0.023	2.283e-198	0.552332
Anp32e	0.759	0.23	1.13365e-197	0.675847
Serbp1	0.991	0.756	2.50336e-197	0.909822
Rps18	0.999	0.998	2.46528e-196	0.762601
Fcgrt	0.694	0.8	4.03644e-196	-1.01559
Fam162a	0.848	0.432	4.32773e-196	0.857196
Phldb2	0.513	0.078	2.38126e-195	0.530832
Hsp90aa1	0.986	0.781	8.66658e-193	1.06112
Snrpa	0.761	0.253	1.79583e-192	0.513778
Mrto4	0.592	0.138	1.21438e-190	0.502466
Prg4	0.509	0.072	2.73187e-190	1.87467
Nasp	0.591	0.125	1.06118e-189	0.56475
Prc1	0.287	0.004	1.20323e-189	0.81575
Itga5	0.661	0.179	4.24606e-189	0.833012
Rhoj	0.838	0.856	5.66713e-188	-0.976344
Mlec	0.832	0.29	6.2579e-188	0.795369
Lsm5	0.802	0.281	1.97842e-187	0.640109
Cd44	0.481	0.067	2.7841e-187	0.524676
Prdx1	0.997	0.967	3.85745e-187	0.807779
Sh3bgrl3	0.961	0.64	8.07436e-187	0.981063
Clic1	0.986	0.77	3.01959e-186	0.923734
Top2a	0.273	0.003	3.35505e-186	1.1194
Dctpp1	0.667	0.181	4.24099e-186	0.633594
Nop58	0.747	0.234	1.17288e-185	0.755141
Col5a2	0.937	0.548	1.24544e-185	1.04386
Rangap1	0.55	0.103	2.53742e-185	0.62148
Odc1	0.76	0.235	2.85501e-185	0.813773
Ecm1	0.77	0.761	1.59448e-184	-1.05152
Gng12	0.797	0.293	7.7281e-184	0.529066
Lama2	0.44	0.699	8.038e-184	-1.15372
Vwa1	0.345	0.751	3.94995e-183	-1.39531
Msn	0.944	0.489	6.60964e-183	0.91113
Psmd14	0.797	0.282	3.47657e-182	0.558611
Kctd11	0.648	0.167	1.56079e-181	0.683124
Ap1s1	0.81	0.281	3.68849e-181	0.653145
H2-D1	0.937	0.96	7.84497e-181	-1.00569
Eif2s1	0.843	0.318	3.08243e-180	0.824485
Nudcd2	0.843	0.316	4.03724e-179	0.818105
Scara5	0.078	0.566	1.59879e-178	-1.54455
Tcp1	0.925	0.451	2.03942e-178	0.862306
Sptbn1	0.888	0.894	4.4961e-178	-0.889719
Ppa1	0.833	0.305	1.18468e-177	0.891928
Apoe	0.501	0.738	2.01982e-177	-3.12865
Gcsh	0.747	0.256	2.11962e-177	0.503251
Naa50	0.809	0.285	5.25917e-177	0.650227
Ubl3	0.491	0.592	7.65309e-177	-0.824765
Prelid1	0.947	0.528	1.14926e-176	0.895464
Nudt4	0.618	0.171	2.13383e-176	0.556584
Lgmn	0.705	0.222	3.50736e-176	0.635268
Glul	0.402	0.629	5.45638e-176	-1.25025
Spc25	0.263	0.003	6.01594e-176	0.662953
Cav1	0.412	0.038	6.26183e-176	0.653919
Cxcl5	0.336	0.022	1.40368e-175	1.88293
Ddah2	0.802	0.843	5.45649e-175	-0.839048
Manf	0.976	0.735	9.89785e-175	1.04924
Nans	0.78	0.264	1.57455e-174	0.618129
Eef1b2	0.987	0.852	2.38329e-174	0.865849
Anxa2	0.993	0.907	2.32887e-173	0.932831
Timp2	0.935	0.958	2.73328e-173	-1.03827
C1qtnf6	0.766	0.261	2.81218e-173	0.59116
Plp2	0.876	0.356	3.38863e-172	0.763945
Hif1a	0.591	0.152	1.04596e-171	0.528331
Mical2	0.566	0.127	1.43572e-171	0.504513
Dtymk	0.797	0.288	1.70283e-171	0.63788
Fkbp10	0.853	0.349	5.158e-171	0.901071
Tpm1	0.927	0.553	5.50881e-171	0.929435
Hnrnpab	0.928	0.501	2.3896e-170	0.895219
Lamp2	0.797	0.768	4.13246e-170	-0.734564
Rnf26	0.649	0.205	6.76662e-170	0.512807
Btf3	0.994	0.924	7.98598e-170	0.742364
Sae1	0.819	0.325	1.15565e-169	0.561226
Lsm2	0.772	0.294	1.54574e-169	0.570922
Celf2	0.685	0.727	2.23009e-169	-0.837044
Slc44a1	0.575	0.519	2.88696e-169	-0.541394
Plxdc2	0.652	0.737	5.06271e-169	-0.989483
Syncrip	0.816	0.306	5.28274e-169	0.583926
Eny2	0.889	0.379	1.26732e-168	0.794019
Hsd11b1	0.362	0.707	1.79133e-168	-2.05117
Ginm1	0.588	0.547	1.80316e-168	-0.575784
Tmem176b	0.592	0.128	2.66473e-168	0.767383
Nav1	0.522	0.639	3.17711e-168	-0.939363
Nhp2	0.799	0.314	3.56842e-168	0.78091
Hdgf	0.954	0.544	5.32268e-168	0.809445
Pcolce2	0.835	0.822	1.01147e-167	-1.03111
Myh9	0.642	0.187	1.12636e-167	0.569262
Rps3	0.997	0.994	1.13366e-167	0.68135
Psma4	0.971	0.64	1.59881e-167	0.851248
Gspt1	0.83	0.316	2.67933e-167	0.668285
Set	0.953	0.563	5.83732e-167	0.872159
Snrpd1	0.886	0.417	7.33122e-167	0.825296
Hnrnpa2b1	0.989	0.764	1.05271e-166	0.839409
Tomm20	0.97	0.607	1.14071e-166	0.854372
Rpl32	0.999	0.996	4.39356e-166	0.669866
Ifngr1	0.754	0.796	5.34194e-165	-0.976091
Unc5b	0.522	0.109	5.9103e-165	0.512876
Tpst1	0.739	0.712	1.58652e-164	-0.732865
Etf1	0.776	0.284	3.38417e-164	0.615795
Mxra8	0.874	0.86	5.17155e-164	-0.801477
Tspan4	0.822	0.332	9.81657e-164	0.95853
P3h1	0.72	0.237	4.05599e-163	0.566405
Rps27l	0.996	0.843	1.81106e-162	0.881315
Spcs3	0.705	0.242	3.41213e-162	0.505862
Tuba1b	0.966	0.89	5.60092e-162	0.993144
Nap1l1	0.957	0.588	1.19048e-161	0.863952
Ddah1	0.346	0.022	1.29636e-161	0.873454
Atp1a2	0.159	0.575	1.53646e-161	-1.37438
Dok1	0.631	0.175	2.08273e-161	0.596618
Cdk4	0.907	0.49	3.73603e-161	0.882947
Rpl41	1	0.999	6.02134e-161	0.632258
Ostc	0.967	0.758	1.67481e-160	0.843159
Cp	0.506	0.738	3.60992e-160	-1.23117
Hnrnpc	0.947	0.49	4.25308e-160	0.819147
Rpl3	1	0.996	8.69649e-160	0.726133
Myl6	0.994	0.944	2.06803e-159	0.803021
mt-Nd3	0.832	0.799	2.79641e-159	-0.72337
Eif1a	0.795	0.319	4.30572e-159	0.510879
Sept8	0.542	0.476	4.71918e-159	-0.505476
Fubp1	0.866	0.373	7.90799e-159	0.616728
Ace	0.412	0.696	1.69439e-158	-1.17208
Dpm3	0.826	0.723	2.12171e-158	-0.538194
Tcf4	0.905	0.916	2.80824e-158	-0.883341
Cyb5a	0.95	0.963	4.91352e-158	-0.862357
Actr3	0.938	0.532	5.57784e-158	0.852644
Plpp3	0.672	0.811	7.69089e-158	-1.23359
Vdac1	0.928	0.456	1.51114e-157	0.743338
Khdrbs1	0.843	0.358	1.62247e-157	0.534333
Zfyve21	0.552	0.502	2.14695e-157	-0.512378
Cct7	0.943	0.526	7.21639e-157	0.81931
Dnajc9	0.526	0.133	3.21094e-156	0.540786
Ccl2	0.546	0.1	6.32423e-156	1.82847
Eif4e2	0.818	0.323	1.13123e-155	0.600173
Ak1	0.687	0.223	1.57816e-155	0.551742
Dazap1	0.842	0.348	3.81972e-155	0.660805
Tmem176a	0.476	0.082	3.99166e-155	0.658615
Gja1	0.398	0.046	6.04209e-155	0.538029
Atraid	0.807	0.725	6.53597e-155	-0.568458
Ccdc34	0.761	0.323	1.18397e-154	0.69352
Lman1	0.912	0.526	3.30311e-154	0.880768
Slc1a5	0.608	0.601	4.32707e-154	-0.727896
Tubb2b	0.609	0.164	1.17633e-153	0.554363
Map1lc3a	0.734	0.7	1.54122e-153	-0.601638
Vim	1	0.991	7.62492e-153	0.879598
Gstt1	0.282	0.584	1.46858e-152	-1.15376
Acaa2	0.509	0.5	1.5621e-152	-0.691144
Eif1ax	0.888	0.392	4.1367e-152	0.699666
Lyar	0.716	0.255	6.8879e-152	0.532922
Surf4	0.902	0.445	1.60387e-151	0.805167
Gabarapl1	0.455	0.501	1.94421e-151	-0.674533
Galk1	0.716	0.255	2.98786e-151	0.566303
Mtpn	0.822	0.34	1.83816e-150	0.58591
Cnn2	0.809	0.357	2.22379e-150	0.942553
Lamb1	0.713	0.715	3.28767e-150	-0.804433
Lsm6	0.859	0.367	4.47538e-150	0.623503
Bzw1	0.928	0.468	5.44721e-150	0.763181
Tmem97	0.674	0.214	5.7454e-150	0.595976
Ahnak2	0.53	0.639	8.55179e-150	-0.922398
H2afv	0.908	0.66	1.01719e-149	0.719772
Srsf7	0.911	0.459	1.11069e-149	0.784968
Sat1	0.728	0.809	2.78003e-149	-1.03047
Tmem159	0.494	0.514	3.22616e-149	-0.64322
P4hb	0.966	0.665	4.61348e-149	0.842631
Pnrc1	0.721	0.771	6.33374e-149	-0.88926
Serpinh1	0.994	0.989	6.8228e-149	0.859894
Txnip	0.418	0.717	1.59814e-148	-1.23454
Tmpo	0.647	0.264	1.71333e-148	0.649035
Hexa	0.7	0.621	2.11979e-148	-0.529325
Rps27a	0.999	0.998	4.49002e-148	0.638348
Hint1	0.99	0.863	4.67318e-148	0.708421
Cct8	0.924	0.515	1.04005e-147	0.795332
Tnfsf12	0.478	0.526	1.05249e-147	-0.669266
Klf3	0.483	0.49	1.27727e-147	-0.668195
Snx18	0.499	0.482	1.31845e-147	-0.580932
Tomm40	0.721	0.27	1.45168e-147	0.548085
Tsc22d3	0.447	0.696	1.52139e-147	-1.29119
Ptx3	0.351	0.043	1.53073e-147	1.26034
Wdr1	0.835	0.342	1.81987e-147	0.637615
Mt2	0.737	0.302	1.82939e-147	1.5541
Drap1	0.858	0.769	2.06379e-147	-0.626523
C1qtnf2	0.381	0.544	2.4638e-147	-0.896552
Amotl1	0.524	0.469	5.08524e-147	-0.504498
Klf13	0.516	0.591	2.15886e-146	-0.776659
March2	0.473	0.489	2.49123e-146	-0.563051
Smim14	0.859	0.794	2.52521e-146	-0.593782
Gstm2	0.542	0.516	2.82228e-146	-0.628381
Atp5b	0.993	0.887	5.15976e-146	0.795238
Ahnak	0.862	0.828	5.98164e-146	-0.770328
Aldh1a1	0.47	0.694	8.20599e-146	-1.25905
Ube2l3	0.894	0.403	1.06391e-145	0.697358
Cct3	0.897	0.459	1.25055e-145	0.757926
Mdh2	0.948	0.644	2.2167e-145	0.81475
Serpine2	0.728	0.877	3.11372e-145	-0.988127
C1qbp	0.83	0.383	4.06894e-145	0.676127
Tubb4b	0.875	0.546	9.01418e-145	0.919135
Naca	0.996	0.961	1.79786e-144	0.614275
Atp5g2	0.966	0.693	1.87076e-144	0.779914
Abracl	0.83	0.361	1.87362e-144	0.619036
Thra	0.47	0.583	1.92086e-144	-0.81487
Smpdl3a	0.17	0.502	2.37652e-144	-1.09271
Banf1	0.901	0.438	2.57474e-144	0.627421
Strap	0.897	0.423	2.69636e-144	0.620505
Col8a1	0.95	0.688	3.12543e-144	1.20095
Cmpk1	0.868	0.401	4.17567e-144	0.572509
Mgp	0.958	0.981	4.42581e-144	-1.11455
Trip10	0.368	0.398	4.74525e-144	-0.560027
Ece1	0.382	0.387	1.53738e-143	-0.532515
Ssr3	0.934	0.559	1.09605e-142	0.816505
Tmem45a	0.822	0.416	1.5215e-142	0.651315
Aplp2	0.783	0.675	2.53776e-142	-0.507597
Cacybp	0.82	0.359	2.6373e-142	0.579215
Sdc2	0.944	0.916	3.83037e-142	-0.747387
Rpl29	0.997	0.969	5.12747e-142	0.65517
Ogt	0.557	0.588	5.35433e-142	-0.681534
Creld2	0.751	0.299	5.626e-142	0.504998
Rpl4	1	0.993	6.40336e-142	0.639433
Pla1a	0.504	0.678	6.79814e-142	-1.17039
Idh2	0.744	0.294	8.77741e-142	0.5391
Aldh1a2	0.691	0.286	1.25322e-141	1.05558
Eif4e	0.818	0.358	2.41205e-141	0.585674
Bri3	0.846	0.772	2.91453e-141	-0.549662
Htra1	0.555	0.706	1.20228e-140	-1.04214
Esd	0.941	0.617	2.49699e-140	0.762515
Eif4a2	0.859	0.777	3.73733e-140	-0.567581
Tmem167	0.968	0.641	3.81129e-140	0.777311
Kdelr2	0.95	0.609	4.30631e-140	0.900417
Smg6	0.519	0.143	5.16212e-140	0.572094
Ssrp1	0.843	0.389	1.13631e-139	0.632098
Cct2	0.905	0.45	1.15987e-139	0.690808
Enpp2	0.108	0.535	1.51855e-139	-1.36269
Scn7a	0.257	0.552	1.6505e-139	-1.05698
Man1a	0.293	0.463	4.0748e-139	-0.841365
Hnrnpu	0.901	0.445	4.08046e-139	0.625618
Nr3c1	0.499	0.513	4.74564e-139	-0.590637
Siva1	0.72	0.3	7.59188e-139	0.509722
Npm3	0.841	0.37	8.5089e-139	0.648774
Tmed2	0.993	0.899	1.2908e-138	0.681403
Zeb1	0.51	0.563	5.82662e-138	-0.736481
Swi5	0.987	0.831	1.07432e-137	0.707346
Prdx4	0.931	0.546	1.94018e-137	0.783323
Col6a1	0.855	0.931	5.17914e-137	-0.801238
Loxl2	0.874	0.449	4.91266e-136	0.821593
Itm2a	0.417	0.589	9.30047e-136	-1.06121
Timp3	0.45	0.753	1.10151e-135	-1.30942
Mettl9	0.878	0.421	4.89099e-135	0.554006
Tm4sf1	0.94	0.682	9.27974e-135	0.958813
C1ra	0.246	0.46	9.77484e-135	-0.95965
Eif6	0.878	0.441	1.45879e-134	0.708897
Atp5g1	0.963	0.732	1.48121e-134	0.772449
Gars	0.759	0.307	1.82909e-134	0.571202
Tceb1	0.931	0.506	4.45984e-134	0.68898
Vasp	0.774	0.328	1.25513e-133	0.559142
Prmt1	0.839	0.388	1.52278e-133	0.703818
Cdc42ep2	0.477	0.5	2.38433e-133	-0.651123
Pdia6	0.983	0.834	6.22094e-133	0.868345
C3	0.279	0.598	7.72604e-133	-1.72518
Mcm6	0.399	0.068	1.41959e-132	0.522646
Rora	0.513	0.576	1.67405e-132	-0.725539
Myl9	0.437	0.095	2.80405e-132	0.741293
Fbl	0.799	0.354	3.63139e-132	0.533577
Rps3a1	1	0.996	6.53447e-132	0.57031
Pid1	0.233	0.512	1.95471e-131	-1.06538
Pa2g4	0.792	0.346	2.23086e-131	0.571913
Tmed9	0.986	0.866	2.32212e-131	0.721192
Nop56	0.731	0.294	2.35067e-131	0.679577
Egr1	0.807	0.802	3.03884e-131	-1.20489
Dynll1	0.996	0.973	4.62156e-131	0.756202
Dcun1d5	0.865	0.405	1.14048e-130	0.594308
Hspg2	0.763	0.742	2.55426e-130	-0.694042
S100a13	0.848	0.745	4.4216e-130	-0.500935
Morf4l2	0.967	0.757	7.95876e-130	0.744171
Nfib	0.774	0.723	1.02063e-129	-0.596546
Mgst1	0.723	0.832	1.21996e-129	-0.959862
Pdpn	0.767	0.384	1.64448e-129	0.649154
Pink1	0.302	0.48	4.09803e-129	-0.799858
Psmd2	0.856	0.405	1.31761e-128	0.630716
Ctsl	0.974	0.972	1.46976e-128	-0.725339
Crtc3	0.33	0.425	2.13379e-128	-0.671449
Inhba	0.404	0.131	2.41311e-128	0.681548
Gpc6	0.612	0.549	3.27181e-128	-0.531952
Lsm4	0.95	0.54	1.64566e-127	0.668011
Serpine1	0.744	0.289	1.759e-127	1.25955
Pdap1	0.953	0.574	3.60577e-127	0.735113
Mast4	0.477	0.455	6.60512e-127	-0.52808
Rabac1	0.943	0.941	8.0844e-127	-0.707099
Snrpe	0.944	0.581	9.26798e-127	0.731384
Ecm2	0.257	0.543	1.69393e-126	-1.07613
Jun	0.882	0.907	2.45675e-126	-1.58546
Ndrg2	0.601	0.586	3.64566e-126	-0.653566
Nono	0.889	0.448	7.95124e-126	0.503567
Fabp5	0.516	0.151	1.29462e-125	0.705198
Psmb7	0.904	0.46	2.45947e-125	0.587063
Mrpl18	0.864	0.419	3.79111e-125	0.593405
Cyb5r3	0.915	0.487	6.68252e-125	0.654134
Ube2n	0.914	0.49	9.63617e-125	0.704887
Jade1	0.443	0.434	1.19545e-124	-0.541851
Eln	0.326	0.657	1.68802e-124	-1.46791
Sfpq	0.901	0.476	2.1427e-124	0.610502
Fstl1	0.997	0.915	2.3075e-124	0.792706
Ptma	0.999	0.996	2.49712e-124	0.663063
Itm2c	0.897	0.82	4.29991e-124	-0.563861
Col1a2	0.981	0.984	5.05665e-124	0.878766
Rps7	0.997	0.994	5.83197e-124	0.601849
Ces1d	0.029	0.396	7.92651e-124	-1.28473
Prnp	0.534	0.564	2.00244e-123	-0.619434
Lig1	0.329	0.047	4.24683e-123	0.507518
Atp5o	0.984	0.695	4.65679e-123	0.68428
Itgb5	0.68	0.633	5.89173e-123	-0.539161
Slc29a1	0.703	0.678	9.8582e-123	-0.673102
Eif4ebp1	0.878	0.474	1.11399e-122	0.751369
Sparc	1	0.997	3.1226e-122	0.801169
Vamp5	0.733	0.327	4.22295e-122	0.579305
Ddb1	0.852	0.409	7.41095e-122	0.575225
Eif3c	0.928	0.507	1.44774e-121	0.554178
C1qtnf7	0.366	0.575	3.31254e-121	-0.931798
Aes	0.841	0.799	4.84021e-121	-0.562151
Acp1	0.898	0.463	2.34654e-120	0.535581
Ifi205	0.313	0.51	3.17899e-120	-1.13943
Atf5	0.7	0.67	3.18304e-120	-0.812478
Txnl1	0.898	0.471	4.74997e-120	0.597051
Pdgfra	0.484	0.551	5.55633e-120	-0.716168
Nfia	0.671	0.691	7.36829e-120	-0.718405
Mrpl42	0.911	0.488	9.77496e-120	0.600627
Hist1h2bc	0.733	0.387	1.00414e-119	0.904207
Pdlim2	0.849	0.804	1.45024e-119	-0.649146
Lama4	0.599	0.562	1.65987e-119	-0.555068
App	0.885	0.812	2.03143e-119	-0.549746
Prdx5	0.954	0.684	2.58458e-119	0.743799
Col6a2	0.799	0.844	3.1158e-119	-0.718527
Eps15	0.289	0.393	6.76945e-119	-0.617511
Matn2	0.566	0.622	9.97663e-119	-0.706998
Cd248	0.455	0.342	3.14787e-118	-0.595014
Ctgf	0.494	0.128	5.46702e-118	0.544714
Tpm3	0.968	0.638	5.9211e-118	0.703074
Tubb3	0.457	0.094	1.02185e-117	0.716532
Cd81	0.99	0.996	1.38908e-117	-0.615541
Eif3a	0.922	0.514	1.4082e-117	0.617054
Sh3bp5	0.398	0.42	1.86788e-117	-0.554976
Reep5	0.966	0.711	2.0635e-117	0.714122
Gm8730	0.98	0.732	2.21874e-117	0.686187
Herpud1	0.687	0.613	3.37994e-117	-0.532953
Aprt	0.724	0.306	3.56611e-117	0.628869
Psmb4	0.95	0.602	3.75483e-117	0.702566
Eif4g2	0.968	0.646	9.28521e-117	0.687914
Il11ra1	0.784	0.712	3.4025e-116	-0.594615
G3bp1	0.927	0.548	6.14599e-116	0.667133
Rpl10a	0.996	0.987	6.28666e-116	0.614673
Psmd7	0.941	0.599	6.70282e-116	0.714273
Cd55	0.3	0.541	3.51116e-115	-1.15135
Junb	0.935	0.901	5.36405e-115	-1.37738
Fhl1	0.688	0.688	5.78385e-115	-0.648185
S100a4	0.641	0.23	6.83628e-115	0.746235
Dek	0.8	0.502	9.80461e-115	0.553212
Srm	0.769	0.369	1.28859e-114	0.742111
Hnrnpdl	0.891	0.478	2.10075e-114	0.596173
Ddx39b	0.865	0.447	2.40782e-114	0.525337
Atp5f1	0.978	0.748	3.1458e-114	0.660216
Higd1a	0.892	0.553	3.51271e-114	0.583319
Ndufa4	0.984	0.804	3.71077e-114	0.663769
C1s1	0.184	0.435	4.01143e-114	-1.04049
Arf4	0.987	0.876	9.42901e-114	0.645512
Snrpf	0.94	0.557	1.10863e-113	0.608195
Spry1	0.585	0.577	1.19068e-113	-0.69374
Cyp27a1	0.08	0.413	3.99366e-113	-0.983842
Ier3	0.677	0.266	4.5563e-113	0.652732
Medag	0.82	0.765	7.57687e-113	-0.575715
Zfp36l1	0.736	0.659	1.1704e-112	-0.576397
Add3	0.49	0.482	1.54019e-112	-0.502926
Mrpl20	0.908	0.488	2.60604e-112	0.55017
Ywhae	0.991	0.855	4.71902e-112	0.626423
Ccdc80	0.976	0.972	1.17689e-111	-0.798045
Tapbp	0.675	0.657	1.22892e-111	-0.561684
Dusp1	0.598	0.752	1.56309e-111	-1.5553
Angptl2	0.739	0.715	2.67811e-111	-0.702662
Rpl36al	0.989	0.866	5.14885e-111	0.661492
B2m	0.994	0.992	5.17424e-111	-0.568234
Hspa9	0.807	0.411	5.65634e-111	0.573113
Serpinb1a	0.359	0.074	1.56913e-110	0.536828
Psma6	0.897	0.483	1.67734e-110	0.552623
Ppic	0.96	0.602	2.26699e-110	0.683924
Col3a1	0.98	0.977	1.07563e-109	0.952211
Gfpt2	0.591	0.466	1.31393e-109	-0.617833
Sash1	0.315	0.425	3.06898e-109	-0.648647
Akap12	0.578	0.642	3.18836e-109	-0.718338
Ebf1	0.83	0.826	3.58926e-109	-0.831454
Snrk	0.31	0.405	4.1615e-109	-0.702943
Srsf6	0.898	0.483	1.10796e-108	0.599714
Qpct	0.366	0.545	1.14951e-108	-0.873544
Klf2	0.659	0.795	1.65857e-108	-1.57435
Naalad2	0.388	0.432	2.31782e-108	-0.552303
Grina	0.328	0.418	8.66958e-108	-0.584768
Mcfd2	0.846	0.439	8.87045e-108	0.563786
Srp9	0.95	0.657	2.12327e-107	0.678966
Srsf3	0.974	0.751	1.53605e-106	0.707596
Zfp385a	0.21	0.442	2.96736e-106	-0.93433
Impdh2	0.878	0.49	1.47305e-105	0.512796
Hsp90b1	0.984	0.897	2.20792e-105	0.810343
1110008F13Rik	0.902	0.5	3.64751e-105	0.558776
Btg2	0.632	0.66	4.38804e-105	-1.37194
Rpl15	0.978	0.858	8.95355e-105	0.662432
Ube2i	0.911	0.51	1.00928e-104	0.588757
Psma7	0.976	0.797	1.28956e-104	0.65045
4930523C07Rik	0.332	0.405	1.40632e-104	-0.561188
Podn	0.119	0.36	1.62323e-104	-0.856595
Hnrnpf	0.977	0.762	2.31375e-104	0.671605
Maged1	0.878	0.512	2.9965e-104	0.717123
Ebf2	0.378	0.418	4.13092e-104	-0.554538
Ar	0.195	0.394	5.8598e-104	-0.787224
Ssr1	0.891	0.489	6.05713e-104	0.592288
Spon1	0.152	0.421	9.27003e-104	-1.01077
Snrpd3	0.875	0.474	1.43577e-103	0.551705
Rem1	0.375	0.41	8.50479e-103	-0.581816
Cirbp	0.307	0.366	2.65283e-102	-0.549469
Rps27	0.997	0.999	1.24061e-101	-0.583665
Fosb	0.591	0.522	2.78139e-101	-0.745828
Rhob	0.626	0.59	9.10099e-101	-0.604839
Phb2	0.911	0.54	1.16687e-100	0.569081
Cnn3	0.927	0.564	1.19633e-100	0.633634
Gas6	0.407	0.624	1.40159e-100	-1.14437
Ppp1ca	0.98	0.767	1.43475e-100	0.59667
Antxr2	0.257	0.338	2.54638e-100	-0.531582
Psma3	0.976	0.757	5.31868e-100	0.633734
Cxcl12	0.536	0.314	5.60884e-100	0.735967
Fos	0.874	0.867	6.89955e-100	-1.40805
Nbl1	0.565	0.581	1.71518e-99	-0.869265
Eif4a1	0.986	0.891	2.94403e-99	0.67752
Cstb	0.871	0.54	3.89009e-99	0.642291
Ssr4	0.976	0.794	4.3694e-99	0.631425
Spcs1	0.967	0.781	7.86943e-99	0.630451
Creb5	0.353	0.397	8.28279e-99	-0.601184
Mrpl17	0.875	0.473	9.54632e-99	0.518421
Cct5	0.943	0.634	2.97344e-98	0.649575
Ssh2	0.205	0.317	5.1804e-98	-0.613049
Hnrnpk	0.99	0.873	2.12338e-97	0.574189
H2B-EGFP	0.833	0.81	2.18628e-97	-0.635683
Prdx2	0.973	0.752	2.24398e-97	0.623964
Arpc2	0.986	0.795	3.11608e-97	0.628746
Ywhah	0.948	0.632	3.82411e-97	0.657577
Ppp1r14a	0.368	0.475	3.88659e-97	-0.819461
Psmb2	0.963	0.687	6.11535e-97	0.620977
Sec13	0.908	0.521	9.15004e-97	0.539221
Tmed10	0.99	0.827	1.03795e-96	0.599009
Rps29	1	0.998	1.1704e-96	-0.716092
Lims2	0.126	0.376	1.28095e-96	-0.850261
Csrp1	0.823	0.455	1.39249e-96	0.512628
Efemp2	0.895	0.512	1.98565e-96	0.553626
Mlf2	0.938	0.611	2.53576e-96	0.61322
Rpn1	0.904	0.528	4.9493e-96	0.527831
Ier2	0.859	0.822	7.11673e-96	-1.25229
Hdlbp	0.898	0.527	1.63361e-95	0.648683
Abi3bp	0.243	0.522	1.7968e-95	-0.895822
Rpl5	0.994	0.959	2.44966e-95	0.569059
Dpysl3	0.895	0.524	3.59501e-95	0.603016
Sec61g	0.996	0.916	3.66141e-95	0.565351
Cd47	0.908	0.858	4.99907e-95	-0.515793
Tceal8	0.908	0.571	1.1698e-94	0.621131
Tppp3	0.466	0.64	3.03167e-94	-1.20652
Lamp1	0.974	0.944	3.13511e-94	-0.554324
Ltbp1	0.269	0.375	6.18045e-94	-0.61512
Fbln5	0.491	0.694	1.19379e-92	-0.93007
Tmem64	0.407	0.417	2.20364e-92	-0.501279
Fmo2	0.068	0.358	4.55139e-92	-1.06455
Pfn1	0.356	0.645	1.77562e-91	-0.520496
Hnrnpa3	0.961	0.685	3.88097e-91	0.625538
Rpl12	0.999	0.969	1.0966e-90	0.548445
Cct4	0.922	0.588	1.8099e-90	0.58197
Thbs1	0.566	0.214	3.93216e-90	0.620655
Actb	0.997	0.994	4.55627e-90	0.80237
Vdac2	0.921	0.585	5.22869e-90	0.570529
Mrpl33	0.958	0.62	1.04993e-89	0.512623
Rcn1	0.912	0.611	1.14662e-89	0.641286
Hspa5	0.986	0.911	1.62241e-89	0.857101
Tgfbr3	0.19	0.319	2.02199e-89	-0.560783
mt-Nd4	0.994	0.998	2.67709e-89	-0.506218
Sulf2	0.332	0.353	2.7178e-89	-0.519528
Erp29	0.922	0.578	2.92388e-89	0.570028
Timm13	0.922	0.569	1.10592e-88	0.538051
Ubc	0.974	0.98	1.62704e-88	-0.730487
Zfp36	0.432	0.511	1.68807e-88	-1.09605
Ablim1	0.151	0.373	2.15951e-88	-0.791054
Uqcrq	0.966	0.689	2.48573e-88	0.581815
Tma7	0.957	0.655	4.72698e-88	0.577724
Tmem140	0.203	0.345	2.55529e-87	-0.631766
Cped1	0.287	0.354	2.67492e-87	-0.510741
Mydgf	0.934	0.601	4.22167e-87	0.571699
Ppp1r15a	0.499	0.429	5.35225e-87	-0.562347
Sept4	0.254	0.34	2.03486e-86	-0.716636
Snrpd2	0.954	0.642	3.15165e-86	0.554995
Nmb	0.099	0.313	3.47379e-86	-1.08799
Isg15	0.443	0.149	4.91476e-86	0.711111
Axl	0.927	0.834	5.17495e-86	-0.540085
Ccl7	0.539	0.189	8.17532e-86	1.45605
Bst2	0.853	0.512	8.37453e-86	0.579357
Rtn4	0.989	0.83	1.99383e-85	0.60912
Socs3	0.555	0.532	2.62405e-85	-0.891549
Gpm6b	0.871	0.876	3.12342e-85	-0.723048
Vcp	0.963	0.693	3.9873e-85	0.583517
Canx	0.937	0.599	6.73038e-85	0.524575
Tcn2	0.197	0.296	7.94687e-85	-0.503802
Rogdi	0.152	0.32	1.18357e-84	-0.633753
Dad1	0.976	0.836	8.00424e-84	0.595737
Sub1	0.945	0.632	9.88667e-84	0.563218
Cox7a2	0.989	0.814	1.85451e-83	0.539276
Psmb3	0.938	0.682	2.39577e-83	0.604645
Mmp14	0.865	0.524	2.88829e-83	0.561856
Gpx8	0.945	0.667	6.77742e-83	0.595893
Dap	0.966	0.735	4.69866e-82	0.618443
Spon2	0.289	0.567	6.12319e-82	-1.21154
Gm9780	0.316	0.373	7.46361e-82	-0.528815
Prex2	0.141	0.321	2.87478e-81	-0.699136
Eif5	0.945	0.639	3.44261e-81	0.542995
Gnb2l1	0.993	0.961	4.039e-81	0.530064
Sar1a	0.963	0.676	4.97424e-81	0.543866
Srsf2	0.971	0.749	2.38379e-80	0.608926
Hes1	0.589	0.652	2.66858e-80	-0.784009
Heyl	0.355	0.441	3.69851e-80	-0.696685
Psmb5	0.94	0.636	6.11645e-80	0.545466
Tmem204	0.221	0.363	3.75658e-79	-0.677175
Mtch1	0.938	0.913	1.36165e-78	-0.513938
Rac1	0.98	0.741	2.12062e-78	0.520419
Gm12840	0.51	0.171	2.29297e-78	0.798941
Hspb1	0.763	0.714	4.20249e-78	-0.708788
Il17d	0.089	0.33	5.89274e-78	-0.731826
Spcs2	0.935	0.677	2.31467e-76	0.576287
Ngf	0.355	0.448	2.95323e-76	-0.685414
Ptn	0.453	0.159	3.14667e-76	0.582631
Cpxm1	0.353	0.362	4.81962e-76	-0.519535
Ap2m1	0.954	0.662	1.75013e-75	0.506054
Bmp4	0.161	0.363	5.10497e-75	-0.815637
Gm2a	0.221	0.4	2.30377e-74	-0.643806
Meg3	0.743	0.826	2.4087e-74	-0.960108
Pgf	0.18	0.456	9.04475e-74	-0.999145
Smtnl2	0.171	0.35	1.19107e-73	-0.649849
Xdh	0.194	0.286	5.57327e-73	-0.504593
Meox1	0.747	0.434	7.59598e-73	0.845426
Emilin1	0.934	0.635	4.18394e-72	0.505766
Rexo2	0.931	0.64	6.82384e-72	0.530552
Nupr1	0.826	0.81	9.07099e-72	-0.53828
Slc25a4	0.989	0.935	1.09937e-71	0.505126
Wbp5	0.967	0.761	1.90943e-71	0.5738
Nrxn2	0.119	0.309	6.04192e-71	-0.68546
Abca6	0.114	0.302	7.02705e-71	-0.662494
S100a11	0.994	0.972	1.21609e-70	0.519189
Hsp90ab1	0.994	0.981	1.67371e-70	0.540649
Cdkn1c	0.129	0.362	2.00696e-70	-0.851721
Prkar1a	0.951	0.677	8.1724e-70	0.506008
Prss23	0.691	0.685	1.68548e-69	-0.647396
Capg	0.892	0.584	3.01737e-69	0.518161
Emp1	0.934	0.785	4.63511e-69	0.557169
Tek	0.154	0.303	9.64414e-69	-0.576729
Hs3st1	0.079	0.333	1.96374e-68	-0.844547
Lbp	0.188	0.318	2.26212e-67	-0.62791
F3	0.193	0.355	3.57798e-67	-0.721872
Kazald1	0.247	0.335	4.23771e-66	-0.527523
Tshz2	0.174	0.333	6.24509e-66	-0.625753
Neat1	0.792	0.749	1.1442e-65	-0.560218
Hmgcs2	0.037	0.277	6.30798e-65	-0.699158
Lrrn4cl	0.122	0.314	6.89298e-65	-0.809461
Agap1	0.126	0.262	7.30616e-65	-0.501105
Id3	0.941	0.725	1.81361e-64	0.810226
Osr1	0.217	0.298	2.63693e-64	-0.658731
Calm2	0.986	0.95	3.3615e-64	0.574133
Ggt5	0.053	0.266	5.38971e-64	-0.733389
Gdi2	0.963	0.756	1.13278e-63	0.503294
Gem	0.276	0.351	1.67048e-63	-0.636919
Phlda1	0.69	0.718	1.00913e-62	-0.5798
AW112010	0.155	0.317	2.61615e-62	-0.668968
Fibin	0.69	0.667	2.12507e-60	-0.551653
Pdzd2	0.162	0.36	2.74665e-58	-0.699505
Thbd	0.204	0.364	6.71136e-57	-0.714781
Plekha6	0.149	0.296	7.66239e-57	-0.537264
Ctsf	0.075	0.281	1.74693e-56	-0.603256
Ackr3	0.093	0.277	1.73244e-55	-0.648229
Klf6	0.644	0.599	3.39009e-55	-0.526742
Hspa8	0.994	0.97	3.43108e-55	0.56875
Abca8b	0.136	0.318	2.95456e-54	-0.606677
Itih5	0.297	0.43	3.38542e-53	-0.543887
Myoc	0.043	0.27	6.5002e-53	-1.05479
Efhd1	0.072	0.291	1.49506e-52	-0.881083
Mafb	0.145	0.328	6.44205e-52	-0.809854
6030408B16Rik	0.355	0.422	3.79779e-51	-0.549889
Itgbl1	0.335	0.388	1.03515e-50	-0.542477
Col4a4	0.141	0.341	1.01526e-49	-0.618181
Kcnk2	0.237	0.307	2.72387e-49	-0.530869
Ly6a	0.761	0.683	6.40337e-47	-0.673056
Hspa1a	0.296	0.369	9.18129e-47	-1.18749
Calr	0.978	0.919	3.53785e-46	0.552595
Tgfbi	0.306	0.34	9.71332e-46	-0.548933
Tmem100	0.103	0.266	6.23318e-45	-1.00252
Trf	0.182	0.284	8.88434e-45	-0.649704
Adm	0.296	0.3	3.74944e-43	-0.663914
Ifi27l2a	0.864	0.91	7.03216e-41	-0.590377
Crip1	0.978	0.983	2.25205e-40	-0.58461
Cxcl14	0.349	0.305	5.44726e-39	-1.25423
Cilp	0.348	0.141	2.48524e-36	0.500625
Ly6c1	0.276	0.268	5.06049e-36	-0.597211
Ackr4	0.103	0.254	1.35599e-33	-0.568966
Mt1	0.849	0.658	2.51906e-30	0.529716

## Sheet: MYO vs F-SL + F-SH
Gene	pct.1	pct.2	p_val_adj	Log2FoldChange
Cthrc1	0.943	0.047	0	4.3444
Postn	0.995	0.231	0	4.17108
Fn1	0.993	0.307	0	4.01388
Sfrp2	0.817	0.178	0	3.66064
Ptn	0.879	0.159	0	3.43029
Ddah1	0.884	0.022	0	3.03858
Col1a1	1	0.947	0	2.98143
Lox	0.956	0.119	0	2.88541
Col1a2	1	0.984	0	2.76769
Col3a1	1	0.977	0	2.74189
1500015O10Rik	0.777	0.025	0	2.63774
Mfap4	0.986	0.398	0	2.53758
Eln	0.859	0.657	0	2.52702
Csrp2	0.983	0.376	0	2.47065
Col5a2	0.995	0.548	0	2.4657
Comp	0.671	0.024	0	2.39567
Timp1	0.904	0.224	0	2.36318
Tagln	0.671	0.047	0	2.33677
Fam101b	0.805	0.101	0	2.33281
Acta2	0.606	0.053	0	2.20122
Ltbp2	0.863	0.055	0	2.18438
Cilp	0.68	0.141	0	2.15882
Wisp2	0.76	0.266	0	2.01187
Ctgf	0.809	0.128	0	1.95053
Col8a1	0.981	0.688	0	1.93677
Thbs4	0.298	0.016	0	1.87619
Sfrp1	0.932	0.579	0	1.81839
Col14a1	0.951	0.355	0	1.80068
C1qtnf3	0.309	0.01	0	1.70958
Fxyd6	0.967	0.604	0	1.7084
Mdk	0.8	0.114	0	1.70813
Cd200	0.734	0.085	0	1.68355
Fmod	0.561	0.015	0	1.67947
Thbs1	0.646	0.214	0	1.67542
Actn1	0.838	0.111	0	1.65074
Wisp1	0.685	0.009	0	1.63529
Tgfb3	0.91	0.267	0	1.63209
Sparc	1	0.997	0	1.62885
H19	0.291	0.006	0	1.61928
Gxylt2	0.901	0.336	0	1.54791
Col5a1	0.96	0.503	0	1.53591
Gucy1a3	0.626	0.085	0	1.49293
C1qtnf6	0.906	0.261	0	1.48995
Crlf1	0.53	0.066	0	1.46324
Lbh	0.852	0.235	0	1.43957
Aspn	0.978	0.67	0	1.43549
Fstl1	1	0.915	0	1.4175
Col16a1	0.832	0.151	0	1.39776
Pdgfrl	0.856	0.311	0	1.39655
Marcksl1	0.736	0.043	0	1.39353
Ppic	0.974	0.602	0	1.37639
Pmepa1	0.928	0.421	0	1.32856
Runx1	0.628	0.023	0	1.30523
Id3	0.98	0.725	0	1.29497
Emp1	0.987	0.785	0	1.27376
Mfap2	0.785	0.265	0	1.25073
Palld	0.651	0.028	0	1.23696
Col12a1	0.542	0.022	0	1.18959
Col4a2	0.906	0.527	0	1.18665
Dkk3	0.678	0.081	0	1.18094
Gm26771	0.461	0.018	0	1.1615
Myl9	0.565	0.095	0	1.15708
Tmsb4x	0.999	0.993	0	1.15701
Cpe	0.566	0.032	0	1.15311
Serf1	0.868	0.297	0	1.14146
Itgbl1	0.872	0.388	0	1.13802
Col8a2	0.583	0.017	0	1.12227
Bgn	1	0.991	0	1.12149
Cst3	1	0.996	0	1.12075
Fbn1	0.989	0.722	0	1.10445
Vamp5	0.811	0.327	0	1.10286
Synpo	0.707	0.094	0	1.09854
Frzb	0.801	0.353	0	1.07297
Tm4sf1	0.923	0.682	0	1.07263
Tmem176b	0.7	0.128	0	1.07083
Thbs2	0.798	0.395	0	1.06946
Rasl11b	0.691	0.147	0	1.06882
Col11a1	0.335	0.003	0	1.048
Tspan6	0.639	0.157	0	1.04649
Loxl3	0.699	0.196	0	1.03535
Plod2	0.745	0.191	0	1.0334
Rbp1	0.991	0.883	0	1.03041
Tpm2	0.716	0.229	0	1.02691
Pam	0.972	0.763	0	1.02166
Fat1	0.705	0.164	0	1.02009
Pdlim3	0.539	0.078	0	1.0178
Gadd45b	0.78	0.276	0	1.00706
Scx	0.311	0.003	0	0.993998
Tns3	0.669	0.108	0	0.991066
Gm10073	0.975	0.685	0	0.963115
Adamts2	0.951	0.627	0	0.960882
Nrep	0.659	0.162	0	0.959313
Foxp1	0.794	0.255	0	0.950952
Tnc	0.368	0.01	0	0.94644
Plac8	0.26	0.012	0	0.940678
Picalm	0.769	0.278	0	0.937355
Lsp1	0.927	0.673	0	0.937185
Enpp1	0.601	0.114	0	0.934551
P4ha3	0.528	0.01	0	0.926168
Eef1b2	0.99	0.852	0	0.924595
1810058I24Rik	0.922	0.53	0	0.918264
Matn4	0.351	0.022	0	0.915329
Aebp1	0.94	0.638	0	0.906036
Fam198b	0.834	0.404	0	0.904786
Fhl2	0.589	0.155	0	0.901343
Fndc1	0.815	0.409	0	0.89655
Wdr89	0.953	0.572	0	0.892952
Rpl39	1	0.993	0	0.88411
Kcnj15	0.4	0.003	0	0.879745
Rps12-ps3	0.969	0.693	0	0.874554
Rps27rt	0.974	0.687	0	0.873167
Snhg18	0.964	0.652	0	0.866087
4931406P16Rik	0.648	0.134	0	0.86299
Slc39a1	0.648	0.263	0	0.861717
Tnfrsf12a	0.661	0.246	0	0.857188
Clec11a	0.488	0.065	0	0.852238
Kif26b	0.445	0.003	0	0.84191
P4hb	0.958	0.665	0	0.840174
Unc5b	0.62	0.109	0	0.836396
Rpl10-ps3	0.968	0.672	0	0.834335
Pabpc1	0.976	0.736	0	0.826027
Phldb2	0.556	0.078	0	0.818273
Igfbp7	1	0.999	0	0.815347
Cdh2	0.475	0.011	0	0.813849
Serf2	0.999	0.985	0	0.813699
Myh9	0.657	0.187	0	0.812352
Rgs4	0.383	0.015	0	0.812144
Lmcd1	0.365	0.012	0	0.812095
Gm10263	0.817	0.312	0	0.806368
Npm1	0.979	0.828	0	0.795212
Itgb5	0.927	0.633	0	0.792721
Ttll5	0.507	0.059	0	0.791687
Tcea3	0.539	0.07	0	0.791559
Adarb1	0.566	0.103	0	0.788197
Lhfpl2	0.529	0.086	0	0.785378
Sox4	0.711	0.26	0	0.78373
Gm8730	0.975	0.732	0	0.78272
Ctsd	0.959	0.793	0	0.781656
Lmo4	0.876	0.55	0	0.781655
Nkd2	0.511	0.094	0	0.776004
Rpl41	1	0.999	0	0.774657
Sh3bgrl3	0.941	0.64	0	0.771335
Loxl1	0.994	0.922	0	0.768935
Nsa2	0.901	0.504	0	0.758218
Rab31	0.589	0.123	0	0.749412
Hif1a	0.594	0.152	0	0.72828
Sdc1	0.583	0.119	0	0.72364
Ctsk	0.73	0.316	0	0.718254
Luzp1	0.762	0.308	0	0.715694
2310022B05Rik	0.684	0.228	0	0.712832
Creb3l2	0.82	0.408	0	0.711863
Rpl27-ps3	0.788	0.325	0	0.702813
Gucy1b3	0.53	0.111	0	0.697917
Nedd9	0.598	0.162	0	0.689795
Ltbp3	0.753	0.291	0	0.688429
Ext1	0.657	0.21	0	0.678644
Sertad4	0.566	0.129	0	0.67718
Fbn2	0.375	0.029	0	0.676551
Vcl	0.566	0.151	0	0.665278
Pxdn	0.66	0.222	0	0.659129
Tpt1	1	0.998	0	0.656428
Ckap4	0.845	0.459	0	0.654394
Dok1	0.604	0.175	0	0.646714
Gm15867	0.45	0.059	0	0.644723
Ptprb	0.363	0.019	0	0.644075
Rps12	0.999	0.984	0	0.643185
Vmp1	0.739	0.371	0	0.642091
Rplp1	1	0.998	0	0.639147
Tmem176a	0.451	0.082	0	0.637048
Neo1	0.483	0.06	0	0.635906
Cdh11	0.396	0.015	0	0.630995
Nox4	0.423	0.05	0	0.624068
Nedd4	0.983	0.804	0	0.620088
Bdnf	0.274	0.011	0	0.615385
Mical2	0.506	0.127	0	0.605146
Dst	0.782	0.352	0	0.604565
Col27a1	0.515	0.135	0	0.59463
Pdgfa	0.397	0.032	0	0.593885
Sdc3	0.639	0.225	0	0.58766
Skil	0.599	0.199	0	0.587178
Ncam1	0.3	0.018	0	0.582748
Rps20	1	0.99	0	0.580292
Gnb2l1	0.997	0.961	0	0.578566
Tmem119	0.679	0.258	0	0.5771
Mrc2	0.694	0.286	0	0.569064
Plscr2	0.346	0.027	0	0.56869
Rps26-ps1	0.766	0.344	0	0.567034
Gm11808	0.853	0.449	0	0.563431
Olfml2b	0.563	0.179	0	0.559449
Rpsa	1	0.989	0	0.558742
Pdzrn3	0.418	0.048	0	0.557986
Rps8	1	0.999	0	0.555668
Gng8	0.421	0.067	0	0.553063
Rpl38	0.999	0.975	0	0.550441
Ap2a2	0.829	0.433	0	0.547272
Dact3	0.493	0.108	0	0.545407
Rpl12	0.998	0.969	0	0.54061
Rps3a1	1	0.996	0	0.53578
Rpl7a-ps5	0.722	0.281	0	0.534471
Nuak1	0.343	0.033	0	0.534094
Shisa4	0.536	0.154	0	0.525997
Snhg6	0.594	0.204	0	0.524237
Usp9x	0.627	0.221	0	0.520234
Ak1	0.612	0.223	0	0.518631
Ptprs	0.548	0.158	0	0.514942
Rplp0	0.999	0.999	0	0.508518
Cdkn2b	0.315	0.025	0	0.504804
Nbea	0.407	0.075	0	0.504187
Chsy1	0.413	0.065	0	0.504115
Piezo2	0.278	0.006	0	0.503519
Ndufa5	0.676	0.668	0	-0.510314
Cyba	0.72	0.75	0	-0.604759
Xbp1	0.764	0.768	0	-0.608295
Plin3	0.414	0.527	0	-0.629079
Ubl3	0.492	0.592	0	-0.639588
Nfe2l2	0.487	0.583	0	-0.654813
Cd63	0.96	0.989	0	-0.669633
Ifi27	0.782	0.801	0	-0.672482
Ifitm2	0.977	0.985	0	-0.679847
Cd151	0.465	0.577	0	-0.681334
Pon2	0.346	0.5	0	-0.682488
Arl6ip5	0.599	0.678	0	-0.687707
Cnbp	0.862	0.888	0	-0.696292
Ftl1	0.999	1	0	-0.699994
Medag	0.718	0.765	0	-0.700441
Rap1a	0.659	0.727	0	-0.707004
Zbtb20	0.962	0.977	0	-0.708973
Atp6ap1	0.457	0.58	0	-0.716032
Ppp1r2	0.573	0.679	0	-0.729305
Lamc1	0.832	0.864	0	-0.750769
Herpud1	0.495	0.613	0	-0.751163
Lamb1	0.633	0.715	0	-0.755144
Aldoa	0.861	0.905	0	-0.766528
Rsrp1	0.937	0.949	0	-0.773795
Fxyd1	0.844	0.877	0	-0.805745
Anxa5	0.951	0.971	0	-0.811333
Tubb6	0.378	0.532	0	-0.816244
Mat2a	0.661	0.716	0	-0.821588
Serpinb6a	0.824	0.844	0	-0.823411
Acaa2	0.313	0.5	0	-0.842385
Cd302	0.726	0.834	0	-0.861241
Hn1	0.595	0.656	0	-0.863487
Pdgfra	0.33	0.551	0	-0.863633
Cdc42ep2	0.265	0.5	0	-0.864337
Lims2	0.09	0.376	0	-0.865742
Sdc2	0.855	0.916	0	-0.875358
S100a10	0.897	0.953	0	-0.882749
H2-D1	0.853	0.96	0	-0.895256
Cyp27a1	0.099	0.413	0	-0.90639
S100a6	0.994	0.998	0	-0.911132
Selm	0.867	0.914	0	-0.92699
Crip2	0.867	0.937	0	-0.932715
Sepp1	0.888	0.971	0	-0.93938
Gstt1	0.365	0.584	0	-0.942297
Cd47	0.76	0.858	0	-0.952778
Ppp1r14a	0.236	0.475	0	-0.959975
Tpst1	0.528	0.712	0	-0.979501
Zfp385a	0.151	0.442	0	-0.980514
Cpq	0.66	0.807	0	-0.986582
Pmp22	0.89	0.951	0	-0.99338
Plpp3	0.633	0.811	0	-0.994973
Qpct	0.256	0.545	0	-0.995282
Drap1	0.637	0.769	0	-0.999958
Gfpt2	0.376	0.466	0	-1.0013
Ubc	0.956	0.98	0	-1.02128
Axl	0.776	0.834	0	-1.03508
Aes	0.641	0.799	0	-1.047
Atp1a2	0.292	0.575	0	-1.04961
6030408B16Rik	0.079	0.422	0	-1.05227
Gas1	0.802	0.914	0	-1.07043
Uap1	0.494	0.629	0	-1.07908
Tuba1b	0.738	0.89	0	-1.08327
Htra1	0.435	0.706	0	-1.08511
Klf9	0.612	0.785	0	-1.10779
Cp	0.484	0.738	0	-1.11942
Rnase4	0.914	0.972	0	-1.19616
Tuba1a	0.93	0.984	0	-1.21251
Itm2b	0.989	0.999	0	-1.22146
Ifngr1	0.579	0.796	0	-1.22649
Aldh1a1	0.415	0.694	0	-1.23781
Tsc22d3	0.432	0.696	0	-1.24569
Phlda1	0.41	0.718	0	-1.26616
Pgf	0.077	0.456	0	-1.26977
Cyb5a	0.881	0.963	0	-1.27877
Atf5	0.41	0.67	0	-1.28811
Entpd2	0.642	0.9	0	-1.3021
Serping1	0.947	0.996	0	-1.30561
Ces1d	0.008	0.396	0	-1.30771
Pcolce2	0.635	0.822	0	-1.3128
Fth1	0.995	0.999	0	-1.35908
Ifi205	0.108	0.51	0	-1.40681
Ramp2	0.379	0.745	0	-1.40809
Slc43a3	0.56	0.856	0	-1.41681
H2B-EGFP	0.497	0.81	0	-1.43106
Glul	0.204	0.629	0	-1.44359
Camk2n1	0.453	0.762	0	-1.44523
Pcsk6	0.456	0.779	0	-1.44746
Abca8a	0.433	0.826	0	-1.44855
Gpx3	0.943	0.987	0	-1.47336
Enpp2	0.049	0.535	0	-1.48257
Igfbp6	0.501	0.818	0	-1.53533
Scara5	0.033	0.566	0	-1.60163
Jund	0.908	0.97	0	-1.6389
Mgst1	0.382	0.832	0	-1.64002
Crispld2	0.656	0.915	0	-1.66001
Pla1a	0.18	0.678	0	-1.67169
Cd34	0.794	0.961	0	-1.72188
Vwa1	0.18	0.751	0	-1.74635
Selenbp1	0.258	0.734	0	-1.7926
Lpl	0.663	0.917	0	-1.79777
Aldh2	0.618	0.92	0	-1.81758
Ms4a4d	0.224	0.799	0	-1.84427
Tnxb	0.142	0.785	0	-1.86533
Ly6a	0.375	0.683	0	-1.88999
Htra3	0.769	0.994	0	-1.89672
Sparcl1	0.564	0.957	0	-1.90302
Rarres2	0.743	0.97	0	-1.91896
Dcn	0.998	1	0	-1.91903
Adamts5	0.475	0.895	0	-2.04644
Gsta3	0.046	0.693	0	-2.1548
Pi16	0.69	0.866	0	-2.22905
G0s2	0.333	0.841	0	-2.35802
Smoc2	0.702	0.973	0	-2.43879
Hsd11b1	0.114	0.707	0	-2.64851
Dpep1	0.333	0.923	0	-2.79661
Gstm1	0.348	0.986	0	-3.37412
Clec3b	0.264	0.978	0	-3.49909
Gsn	0.967	1	0	-4.40976
Hcfc1r1	0.907	0.597	1.51915304783266e-319	0.681493
Tubb4b	0.382	0.546	3.79788261958166e-319	-0.793738
Gm9843	0.946	0.644	6.83618871524699e-319	0.627424
Emp3	0.886	0.916	4.36756501251891e-317	-0.719703
Slc1a5	0.547	0.601	7.07925320290022e-317	-0.645966
Fermt2	0.571	0.6	1.53639543492557e-315	-0.568037
Tmem45a	0.771	0.416	1.54080097876428e-315	0.634204
Man1a	0.278	0.463	4.66129325431736e-315	-0.744111
Dpysl3	0.875	0.524	1.95699346478418e-313	0.641017
Txnip	0.589	0.717	5.08488933271587e-313	-0.891485
Golga7	0.83	0.457	5.90861513238304e-313	0.615318
Ndufb8	0.637	0.674	2.28584786718523e-312	-0.53953
Odc1	0.615	0.235	3.07167588747167e-311	0.544155
Rhob	0.52	0.59	4.42278321028883e-311	-0.731567
Myh10	0.566	0.198	4.6788568055561e-311	0.519919
Dap	0.962	0.735	0	0.655939
Crtap	0.775	0.387	0	0.504945
Fbln5	0.909	0.694	1.14534e-307	0.901204
Iqgap1	0.787	0.43	3.29924e-306	0.579222
Stx4a	0.463	0.505	7.54717e-306	-0.507818
Dhrs7	0.408	0.54	8.41213e-306	-0.652972
Ifitm3	0.99	0.996	7.87815e-305	-0.700142
Tnfsf12	0.411	0.526	9.23898e-305	-0.625544
Mmp14	0.85	0.524	6.37813e-304	0.729698
Ccnd1	0.113	0.413	1.51618e-303	-1.05323
Ace	0.56	0.696	5.91527e-303	-0.771884
Ywhaq	0.825	0.818	8.43722e-303	-0.541238
Spon2	0.228	0.567	3.51899e-302	-1.22719
Ddah2	0.854	0.843	1.23471e-301	-0.577392
Ndufs7	0.617	0.647	3.3561e-301	-0.520171
S100a13	0.764	0.745	3.51937e-301	-0.52776
Fkbp11	0.48	0.138	2.97656e-300	0.506873
Hs3st1	0.047	0.333	3.91204e-300	-0.901164
Cnn2	0.728	0.357	5.77702e-300	0.716647
Pls3	0.775	0.416	1.12732e-298	0.633961
Myl12a	0.99	0.952	2.85582e-298	0.652547
Etfa	0.478	0.538	2.65921e-297	-0.541725
Sdha	0.499	0.542	2.58557e-296	-0.508142
Pink1	0.405	0.48	7.87899e-295	-0.549511
Ginm1	0.508	0.547	3.77083e-294	-0.509908
Akap12	0.487	0.642	1.1159e-289	-0.766194
Dtnbp1	0.367	0.454	1.63724e-289	-0.543369
Cyr61	0.86	0.495	8.93755e-289	0.594052
Bmp4	0.129	0.363	3.11969e-288	-0.843703
Rem1	0.164	0.41	4.73351e-288	-0.820235
Ehd2	0.379	0.466	3.77485e-287	-0.572046
Capns1	0.909	0.903	1.71733e-286	-0.568668
Gm9493	0.884	0.535	4.1217e-286	0.563341
Tcf4	0.925	0.916	5.47779e-286	-0.635877
Ap3s1	0.867	0.532	2.05188e-284	0.567671
Lpar1	0.584	0.648	2.62106e-284	-0.598315
Surf4	0.807	0.445	2.82858e-284	0.501515
Sfxn1	0.328	0.457	1.3981e-283	-0.630052
Trip10	0.224	0.398	1.14871e-282	-0.641554
Ugp2	0.648	0.705	7.10089e-282	-0.737766
Eva1b	0.939	0.683	6.5099e-281	0.624814
Rhoj	0.802	0.856	1.34173e-279	-0.691111
Ndn	0.475	0.547	1.95672e-279	-0.591588
Hdlbp	0.873	0.527	2.00143e-278	0.538602
Hist1h2bc	0.748	0.387	4.20825e-278	0.665759
Ecm1	0.81	0.761	1.22811e-277	-0.621475
Cyb5r3	0.842	0.487	4.07322e-277	0.565897
Pdgfrb	0.739	0.376	5.4549e-277	0.526789
Slc29a1	0.611	0.678	1.45675e-276	-0.682319
Eef1d	0.877	0.863	1.06025e-274	-0.522427
Klf4	0.688	0.791	6.3783e-274	-1.17017
Carhsp1	0.517	0.537	8.89968e-274	-0.530612
Cnn3	0.878	0.564	1.27134e-273	0.588357
Atp5b	0.874	0.887	1.31489e-273	-0.598149
Gstp1	0.152	0.324	1.84011e-273	-0.591714
Zeb1	0.531	0.563	8.54645e-273	-0.548865
Apoe	0.649	0.738	2.42416e-272	-1.90065
Tpm1	0.848	0.553	2.55805e-272	0.585898
Prelp	0.784	0.883	1.60263e-271	-0.671449
Marcks	0.965	0.737	1.72697e-271	0.652975
Cdk2ap2	0.569	0.605	5.36224e-271	-0.542096
Celf2	0.703	0.727	7.55628e-271	-0.563526
Ifi27l2a	0.812	0.91	6.04559e-268	-1.18358
Cd9	0.81	0.825	1.37622e-266	-0.752494
Sec61b	0.963	0.778	1.59992e-266	0.600587
Scn7a	0.345	0.552	3.90349e-266	-0.766527
Sgce	0.563	0.6	5.9873e-266	-0.531682
Lrrn4cl	0.061	0.314	8.09086e-266	-0.881072
Rogdi	0.079	0.32	9.39305e-266	-0.691624
Junb	0.883	0.901	6.64767e-265	-1.21168
Dhrs3	0.597	0.252	5.44135e-264	0.515262
Sqrdl	0.203	0.356	3.81179e-263	-0.554435
Angptl2	0.593	0.715	7.00447e-263	-0.771909
Gpm6b	0.85	0.876	2.37335e-262	-0.70802
Ier2	0.789	0.822	3.52304e-262	-1.24256
Ost4	0.929	0.64	7.52332e-261	0.527498
C3	0.332	0.598	2.21846e-260	-1.23632
Tmem50a	0.869	0.865	6.81387e-260	-0.510315
Rora	0.502	0.576	3.50807e-259	-0.586161
Nmb	0.053	0.313	3.61702e-258	-1.08376
AW112010	0.056	0.317	3.32194e-256	-0.790407
Ngf	0.207	0.448	3.32648e-256	-0.863711
Snrk	0.363	0.405	6.04484e-256	-0.518907
Cd248	0.356	0.342	3.34983e-255	-0.631499
C1qtnf7	0.491	0.575	1.55513e-254	-0.616043
Efhd1	0.04	0.291	2.74906e-254	-0.94599
Col4a1	0.895	0.692	4.33152e-253	0.717237
Fmo2	0.091	0.358	6.22668e-253	-0.955529
Ebf1	0.818	0.826	7.4817e-253	-0.68916
Abca6	0.047	0.302	4.17691e-252	-0.720213
Sepw1	0.944	0.932	2.94808e-251	-0.539223
Dnaja1	0.834	0.807	1.11055e-250	-0.576433
Ndrg2	0.542	0.586	2.11212e-249	-0.586506
Sat1	0.768	0.809	3.94498e-248	-0.71276
Por	0.245	0.367	3.51756e-247	-0.576295
Gpx7	0.855	0.531	2.38303e-246	0.533748
Adm	0.061	0.3	2.12914e-243	-1.16444
Eif4a1	0.896	0.891	5.01119e-243	-0.548293
Lama2	0.656	0.699	8.70698e-243	-0.562688
Jade1	0.287	0.434	9.59079e-243	-0.638288
Oaf	0.822	0.865	1.88173e-241	-0.566488
F3	0.101	0.355	1.61035e-240	-0.813922
Hic1	0.304	0.437	1.26391e-239	-0.632704
Tppp3	0.384	0.64	2.37244e-239	-1.10542
Gas6	0.893	0.624	4.06831e-239	0.739479
Dclk1	0.681	0.363	1.49201e-238	0.541092
Spry1	0.545	0.577	4.99966e-238	-0.600049
Btg1	0.849	0.533	9.74028e-238	0.590885
Add3	0.361	0.482	6.87687e-237	-0.586423
Pcolce	0.96	0.978	1.85777e-235	-0.581864
Fhl1	0.667	0.688	2.21835e-235	-0.54467
Podn	0.121	0.36	1.12384e-234	-0.764733
Atp5g2	0.94	0.693	6.21602e-234	0.514227
Ggt5	0.036	0.266	3.23748e-233	-0.739298
Ece1	0.229	0.387	2.04787e-230	-0.598617
Cd55	0.4	0.541	1.06868e-229	-0.810782
C1ra	0.343	0.46	8.01649e-229	-0.642214
Ar	0.214	0.394	1.30136e-228	-0.663623
Srsf2	0.743	0.749	1.53732e-227	-0.510816
Xdh	0.062	0.286	6.00051e-226	-0.650824
Efemp2	0.825	0.512	1.15957e-224	0.503233
Cygb	0.946	0.957	3.47923e-224	-0.5961
Pfkp	0.21	0.333	3.74396e-224	-0.512559
Cxcl12	0.531	0.314	1.41012e-223	0.793342
Meox1	0.762	0.434	1.52179e-223	0.721703
Kdelr2	0.884	0.609	1.49283e-221	0.521224
Prex2	0.108	0.321	1.3005e-220	-0.688429
Socs3	0.424	0.532	5.67998e-220	-1.00423
Sash1	0.334	0.425	5.89574e-220	-0.509493
Nid1	0.944	0.928	1.99402e-219	-0.543018
Antxr2	0.186	0.338	2.38231e-219	-0.549506
Tgm2	0.127	0.334	5.16318e-218	-0.634921
Myoc	0.04	0.27	1.57355e-217	-1.08828
Cald1	0.968	0.851	2.42092e-217	0.592729
Sox9	0.658	0.335	2.97916e-216	0.551511
Slco3a1	0.192	0.342	8.50982e-216	-0.571052
Ackr3	0.052	0.277	4.97016e-211	-0.684517
Il17d	0.171	0.33	6.62145e-210	-0.575737
Abca8b	0.098	0.318	1.30613e-209	-0.647268
Tspo	0.911	0.91	6.47919e-209	-0.505043
Ablim1	0.176	0.373	7.91737e-209	-0.673762
Srsf3	0.718	0.751	1.17788e-206	-0.5149
Hspb1	0.746	0.714	1.83503e-206	-0.659446
Wbp5	0.953	0.761	1.41663e-205	0.524033
Tgfbr3	0.137	0.319	5.04903e-204	-0.562326
Mnda	0.16	0.303	4.76245e-203	-0.546885
Ssr2	0.914	0.675	1.2276e-201	0.50508
Nsg1	0.101	0.29	2.26105e-201	-0.567277
Sipa1	0.165	0.31	4.64354e-201	-0.531336
Srpx2	0.874	0.603	2.40438e-200	0.538003
Jun	0.877	0.907	6.66785e-199	-1.07532
Mfap5	0.994	0.925	4.47485e-197	0.574766
Hspa1a	0.172	0.369	5.62954e-196	-1.44477
Pid1	0.38	0.512	1.8972e-194	-0.640095
Fgl2	0.377	0.121	1.47197e-193	0.503357
Dusp1	0.67	0.752	6.19171e-192	-1.03528
Anxa1	0.835	0.835	3.14018e-191	-0.546167
Timp3	0.893	0.753	5.34496e-190	0.792174
Ltbp1	0.245	0.375	5.00621e-189	-0.546136
Col5a3	0.256	0.401	8.68767e-189	-0.627154
Tmem100	0.062	0.266	7.55926e-187	-1.05725
Adamtsl2	0.488	0.226	1.90982e-184	0.719788
Ier3	0.558	0.266	2.21539e-183	0.510177
Thbd	0.23	0.364	3.39966e-182	-0.645752
Gm42418	0.888	0.644	1.0024e-180	0.543437
Cystm1	0.094	0.274	3.21112e-179	-0.552723
Mgp	1	0.981	4.62503e-179	0.964442
Prss23	0.677	0.685	1.6789e-174	-0.58444
Spon1	0.243	0.421	2.35865e-174	-0.703802
Itm2a	0.755	0.589	1.32185e-173	0.614865
Cxcl14	0.132	0.305	1.89005e-172	-2.23549
Creb5	0.281	0.397	8.34785e-172	-0.566184
Cfh	0.884	0.915	1.89991e-170	-0.609074
Tshz2	0.157	0.333	1.0794e-165	-0.58372
Sept4	0.202	0.34	6.76023e-161	-0.663602
Tgfbi	0.224	0.34	1.40365e-159	-0.688754
Col4a4	0.122	0.341	9.8631e-157	-0.598186
Cxcl1	0.358	0.513	2.0727e-144	-1.30627
Nrxn2	0.153	0.309	6.42521e-144	-0.54835
Lbp	0.163	0.318	1.58782e-143	-0.571356
Kcnk2	0.111	0.307	1.70423e-143	-0.650607
Cdkn1c	0.206	0.362	2.11773e-141	-0.624753
Pdzd2	0.221	0.36	3.0561e-141	-0.546407
Figf	0.281	0.088	1.4248e-139	0.614634
Gadd45a	0.143	0.268	2.25057e-137	-0.516371
Serpina3n	0.397	0.19	2.18254e-133	0.539888
Ly6c1	0.107	0.268	1.41864e-130	-0.918856
Ogn	0.972	0.913	5.25345e-114	0.520675
Btg2	0.674	0.66	1.7219e-102	-0.698102
Fos	0.925	0.867	1.22504e-91	-0.601613
Zfp36	0.481	0.511	3.12906e-84	-0.545657
Mt1	0.713	0.658	2.09858e-82	-0.541526
