# Supplementary material for: Single-cell expression profiling reveals dynamic flux of cardiac stromal, vascular and immune cells in health and injury
Source: eLife journal article supplement (doi:10.7554/elife.43882), 2019-03-26
Supplement: supp [file elife-43882-supp-v1.zip › elife_poa_e43882_Supplementary_File_6.xlsx]

## Sheet: F-SH (Sham) vs F-SL (Sham)
Analysis Type:	PANTHER Overrepresentation Test (Released 20171205)
Annotation Version and Release Date:	GO Ontology database Released 2018-02-02
Analyzed List:	upload_1 (Mus musculus)
Reference List:	GFP_expressed_genes.txt (Mus musculus)	There are duplicate IDs in the file. The unique set of IDs will be used.
Test Type:	FISHER
GO biological process complete	GFP_expressed_genes.txt - REFLIST (13773)	upload_1 (86)	upload_1 (expected)	upload_1 (over/under)	upload_1 (fold Enrichment)	upload_1 (raw P-value)	upload_1 (FDR)
biological adhesion (GO:0022610)	589	15	3.68	0	4.08	4.03e-06	0.0117
cell adhesion (GO:0007155)	580	15	3.62	0	4.14	3.35e-06	0.0122
regulation of anatomical structure morphogenesis (GO:0022603)	812	18	5.07	0	3.55	2.62e-06	0.0127
regulation of cell differentiation (GO:0045595)	1349	24	8.42	0	2.85	1.91e-06	0.0139
developmental process (GO:0032502)	3938	45	24.59	0	1.83	5.91e-06	0.0144
negative regulation of multicellular organismal process (GO:0051241)	892	18	5.57	0	3.23	9.44e-06	0.0153
multicellular organism development (GO:0007275)	3452	41	21.55	0	1.9	7.78e-06	0.0162
negative regulation of response to stimulus (GO:0048585)	1190	21	7.43	0	2.83	1.13e-05	0.0165
regulation of developmental process (GO:0050793)	1937	30	12.09	0	2.48	1.15e-06	0.0167
supramolecular fiber organization (GO:0097435)	335	11	2.09	0	5.26	9.2e-06	0.0168
anatomical structure development (GO:0048856)	3667	42	22.9	0	1.83	1.27e-05	0.0169
regulation of locomotion (GO:0040012)	749	16	4.68	0	3.42	1.62e-05	0.0182
regulation of cellular component movement (GO:0051270)	757	16	4.73	0	3.38	1.85e-05	0.0192
regulation of cell development (GO:0060284)	748	16	4.67	0	3.43	1.6e-05	0.0194
regulation of multicellular organismal development (GO:2000026)	1481	23	9.25	0	2.49	3.03e-05	0.0232
positive regulation of cell differentiation (GO:0045597)	788	16	4.92	0	3.25	2.99e-05	0.0242
regulation of response to external stimulus (GO:0032101)	533	13	3.33	0	3.91	2.97e-05	0.0255
regulation of response to wounding (GO:1903034)	134	7	0.84	0	8.37	2.67e-05	0.026
regulation of cell motility (GO:2000145)	698	15	4.36	0	3.44	2.9e-05	0.0264
regulation of multicellular organismal process (GO:0051239)	2177	29	13.59	0	2.13	4.13e-05	0.0301
negative regulation of blood coagulation (GO:0030195)	29	4	0.18	0	22.09	4.93e-05	0.0312
cellular developmental process (GO:0048869)	2647	33	16.53	0	2	4.57e-05	0.0317
negative regulation of hemostasis (GO:1900047)	29	4	0.18	0	22.09	4.93e-05	0.0327
negative regulation of coagulation (GO:0050819)	30	4	0.19	0	21.35	5.56e-05	0.0338
regulation of cell migration (GO:0030334)	669	14	4.18	0	3.35	7.33e-05	0.0369
regulation of blood coagulation (GO:0030193)	65	5	0.41	0	12.32	7.21e-05	0.0376
regulation of hemostasis (GO:1900046)	65	5	0.41	0	12.32	7.21e-05	0.0389
regulation of wound healing (GO:0061041)	107	6	0.67	0	8.98	7.11e-05	0.0399
positive regulation of cell-substrate adhesion (GO:0010811)	107	6	0.67	0	8.98	7.11e-05	0.0415
regulation of coagulation (GO:0050818)	68	5	0.42	0	11.78	8.82e-05	0.0429

## Sheet: F-SL (Sham) vs F-SH (Sham)
Analysis Type:	PANTHER Overrepresentation Test (Released 20171205)
Annotation Version and Release Date:	GO Ontology database Released 2018-02-02
Analyzed List:	upload_1 (Mus musculus)
Reference List:	GFP_expressed_genes.txt (Mus musculus)	There are duplicate IDs in the file. The unique set of IDs will be used.
Test Type:	FISHER
GO biological process complete	GFP_expressed_genes.txt - REFLIST (13773)	upload_1 (86)	upload_1 (expected)	upload_1 (over/under)	upload_1 (fold Enrichment)	upload_1 (raw P-value)	upload_1 (FDR)
biological adhesion (GO:0022610)	589	15	3.68	0	4.08	4.03e-06	0.0117
cell adhesion (GO:0007155)	580	15	3.62	0	4.14	3.35e-06	0.0122
regulation of anatomical structure morphogenesis (GO:0022603)	812	18	5.07	0	3.55	2.62e-06	0.0127
regulation of cell differentiation (GO:0045595)	1349	24	8.42	0	2.85	1.91e-06	0.0139
developmental process (GO:0032502)	3938	45	24.59	0	1.83	5.91e-06	0.0144
negative regulation of multicellular organismal process (GO:0051241)	892	18	5.57	0	3.23	9.44e-06	0.0153
multicellular organism development (GO:0007275)	3452	41	21.55	0	1.9	7.78e-06	0.0162
negative regulation of response to stimulus (GO:0048585)	1190	21	7.43	0	2.83	1.13e-05	0.0165
regulation of developmental process (GO:0050793)	1937	30	12.09	0	2.48	1.15e-06	0.0167
supramolecular fiber organization (GO:0097435)	335	11	2.09	0	5.26	9.2e-06	0.0168
anatomical structure development (GO:0048856)	3667	42	22.9	0	1.83	1.27e-05	0.0169
regulation of locomotion (GO:0040012)	749	16	4.68	0	3.42	1.62e-05	0.0182
regulation of cellular component movement (GO:0051270)	757	16	4.73	0	3.38	1.85e-05	0.0192
regulation of cell development (GO:0060284)	748	16	4.67	0	3.43	1.6e-05	0.0194
regulation of multicellular organismal development (GO:2000026)	1481	23	9.25	0	2.49	3.03e-05	0.0232
positive regulation of cell differentiation (GO:0045597)	788	16	4.92	0	3.25	2.99e-05	0.0242
regulation of response to external stimulus (GO:0032101)	533	13	3.33	0	3.91	2.97e-05	0.0255
regulation of response to wounding (GO:1903034)	134	7	0.84	0	8.37	2.67e-05	0.026
regulation of cell motility (GO:2000145)	698	15	4.36	0	3.44	2.9e-05	0.0264
regulation of multicellular organismal process (GO:0051239)	2177	29	13.59	0	2.13	4.13e-05	0.0301
negative regulation of blood coagulation (GO:0030195)	29	4	0.18	0	22.09	4.93e-05	0.0312
cellular developmental process (GO:0048869)	2647	33	16.53	0	2	4.57e-05	0.0317
negative regulation of hemostasis (GO:1900047)	29	4	0.18	0	22.09	4.93e-05	0.0327
negative regulation of coagulation (GO:0050819)	30	4	0.19	0	21.35	5.56e-05	0.0338
regulation of cell migration (GO:0030334)	669	14	4.18	0	3.35	7.33e-05	0.0369
regulation of blood coagulation (GO:0030193)	65	5	0.41	0	12.32	7.21e-05	0.0376
regulation of hemostasis (GO:1900046)	65	5	0.41	0	12.32	7.21e-05	0.0389
regulation of wound healing (GO:0061041)	107	6	0.67	0	8.98	7.11e-05	0.0399
positive regulation of cell-substrate adhesion (GO:0010811)	107	6	0.67	0	8.98	7.11e-05	0.0415
regulation of coagulation (GO:0050818)	68	5	0.42	0	11.78	8.82e-05	0.0429

## Sheet: F-Trans vs F-SL + F-SH
Analysis Type:	PANTHER Overrepresentation Test (Released 20171205)
Annotation Version and Release Date:	GO Ontology database Released 2017-12-27
Analyzed List:	upload_1 (Mus musculus)
Reference List:	GFP_expressed_genes.txt (Mus musculus)	There are duplicate IDs in the file. The unique set of IDs will be used.
Test Type:	FISHER
GO biological process complete	GFP_expressed_genes.txt - REFLIST (13760)	upload_1 (71)	upload_1 (expected)	upload_1 (over/under)	upload_1 (fold Enrichment)	upload_1 (raw P-value)	upload_1 (FDR)
extracellular structure organization (GO:0043062)	160	13	0.83	0	15.75	3.61e-12	2.63e-08
extracellular matrix organization (GO:0030198)	159	13	0.82	0	15.85	3.35e-12	4.89e-08
regulation of ossification (GO:0030278)	178	11	0.92	0	11.98	2.91e-09	1.06e-05
regulation of cell proliferation (GO:0042127)	1284	25	6.63	0	3.77	2.77e-09	1.35e-05
regulation of multicellular organismal process (GO:0051239)	2202	32	11.36	0	2.82	8.75e-09	2.55e-05
positive regulation of cell proliferation (GO:0008284)	716	18	3.69	0	4.87	1.98e-08	4.82e-05
negative regulation of multicellular organismal process (GO:0051241)	899	19	4.64	0	4.1	1.1e-07	0.00023
regulation of developmental process (GO:0050793)	1938	28	10	0	2.8	1.44e-07	0.000262
regulation of multicellular organismal development (GO:2000026)	1508	24	7.78	0	3.08	2.93e-07	0.000475
response to stimulus (GO:0050896)	4809	46	24.81	0	1.85	5.07e-07	0.000739
negative regulation of developmental process (GO:0051093)	743	16	3.83	0	4.17	1.08e-06	0.00113
circulatory system development (GO:0072359)	732	16	3.78	0	4.24	8.92e-07	0.00118
regulation of cell differentiation (GO:0045595)	1379	22	7.12	0	3.09	1.06e-06	0.00119
negative regulation of peptidase activity (GO:0010466)	143	8	0.74	0	10.84	9.97e-07	0.00121
regulation of osteoblast differentiation (GO:0045667)	109	7	0.56	0	12.45	2.08e-06	0.00168
regulation of epithelial cell proliferation (GO:0050678)	278	10	1.43	0	6.97	1.97e-06	0.00169
negative regulation of cellular process (GO:0048523)	3504	37	18.08	0	2.05	1.77e-06	0.00172
negative regulation of cell motility (GO:2000146)	214	9	1.1	0	8.15	1.96e-06	0.00179
negative regulation of cellular component movement (GO:0051271)	226	9	1.17	0	7.72	3.02e-06	0.0022
collagen fibril organization (GO:0030199)	39	5	0.2	0	24.85	2.87e-06	0.00221
animal organ development (GO:0048513)	2118	27	10.93	0	2.47	3.22e-06	0.00224
regulation of response to stimulus (GO:0048583)	2690	31	13.88	0	2.23	3.59e-06	0.00238
negative regulation of locomotion (GO:0040013)	241	9	1.24	0	7.24	5e-06	0.00317
negative regulation of response to stimulus (GO:0048585)	1191	19	6.15	0	3.09	7.21e-06	0.00421
negative regulation of biological process (GO:0048519)	3844	38	19.83	0	1.92	7.07e-06	0.0043
regulation of cell migration (GO:0030334)	669	14	3.45	0	4.06	7.88e-06	0.00443
negative regulation of molecular function (GO:0044092)	776	15	4	0	3.75	9.07e-06	0.0049
supramolecular fiber organization (GO:0097435)	335	10	1.73	0	5.79	9.78e-06	0.0051
negative regulation of cell migration (GO:0030336)	202	8	1.04	0	7.68	1.16e-05	0.00563
regulation of immune system process (GO:0002682)	896	16	4.62	0	3.46	1.15e-05	0.0058
negative regulation of endopeptidase activity (GO:0010951)	95	6	0.49	0	12.24	1.27e-05	0.00581
regulation of peptidase activity (GO:0052547)	273	9	1.41	0	6.39	1.32e-05	0.00584
regulation of cell motility (GO:2000145)	698	14	3.6	0	3.89	1.26e-05	0.00595
positive regulation of epithelial cell proliferation (GO:0050679)	152	7	0.78	0	8.93	1.67e-05	0.00716
negative regulation of signal transduction (GO:0009968)	932	16	4.81	0	3.33	1.87e-05	0.00778
regulation of proteolysis (GO:0030162)	535	12	2.76	0	4.35	1.97e-05	0.00799
cellular response to X-ray (GO:0071481)	8	3	0.04	0	72.68	2.08e-05	0.00819
tissue development (GO:0009888)	1170	18	6.04	0	2.98	2.18e-05	0.00836
heart development (GO:0007507)	453	11	2.34	0	4.71	2.24e-05	0.00837
negative regulation of cell differentiation (GO:0045596)	548	12	2.83	0	4.24	2.49e-05	0.00907
regulation of canonical Wnt signaling pathway (GO:0060828)	167	7	0.86	0	8.12	2.99e-05	0.00968
regulation of locomotion (GO:0040012)	749	14	3.86	0	3.62	2.74e-05	0.00975
regulation of cellular component movement (GO:0051270)	757	14	3.91	0	3.58	3.08e-05	0.00976
regulation of biomineral tissue development (GO:0070167)	65	5	0.34	0	14.91	2.89e-05	0.0098
connective tissue development (GO:0061448)	167	7	0.86	0	8.12	2.99e-05	0.0099
negative regulation of proteolysis (GO:0045861)	230	8	1.19	0	6.74	2.86e-05	0.00993
regulation of signal transduction (GO:0009966)	2087	25	10.77	0	2.32	3.4e-05	0.0105
negative regulation of ossification (GO:0030279)	68	5	0.35	0	14.25	3.54e-05	0.0108
positive regulation of response to stimulus (GO:0048584)	1486	20	7.67	0	2.61	4.61e-05	0.0132
regulation of epithelial to mesenchymal transition (GO:0010717)	72	5	0.37	0	13.46	4.58e-05	0.0134
positive regulation of catenin import into nucleus (GO:0035413)	11	3	0.06	0	52.86	4.53e-05	0.0135
negative regulation of signaling (GO:0023057)	1018	16	5.25	0	3.05	5.39e-05	0.014
regulation of programmed cell death (GO:0043067)	1253	18	6.47	0	2.78	5.36e-05	0.0142
negative regulation of cell communication (GO:0010648)	1015	16	5.24	0	3.06	5.2e-05	0.0143
regulation of cell death (GO:0010941)	1375	19	7.09	0	2.68	5.31e-05	0.0144
negative regulation of immune system process (GO:0002683)	326	9	1.68	0	5.35	5.12e-05	0.0144
positive regulation of canonical Wnt signaling pathway (GO:0090263)	77	5	0.4	0	12.58	6.21e-05	0.0159
tube development (GO:0035295)	513	11	2.65	0	4.16	6.77e-05	0.017
response to wounding (GO:0009611)	264	8	1.36	0	5.87	7.35e-05	0.0182
negative regulation of hydrolase activity (GO:0051346)	266	8	1.37	0	5.83	7.74e-05	0.0188
regulation of cell communication (GO:0010646)	2310	26	11.92	0	2.18	7.98e-05	0.0191
regulation of signaling (GO:0023051)	2331	26	12.03	0	2.16	8.5e-05	0.0197
negative regulation of MAPK cascade (GO:0043409)	135	6	0.7	0	8.61	8.38e-05	0.0197
negative regulation of catalytic activity (GO:0043086)	529	11	2.73	0	4.03	8.87e-05	0.0199
negative regulation of osteoblast differentiation (GO:0045668)	42	4	0.22	0	18.46	8.84e-05	0.0202
negative regulation of protein metabolic process (GO:0051248)	845	14	4.36	0	3.21	9.94e-05	0.022
negative regulation of cell-substrate adhesion (GO:0010812)	45	4	0.23	0	17.23	0.000113	0.0247
skeletal system development (GO:0001501)	367	9	1.89	0	4.75	0.000124	0.0266
biomineral tissue development (GO:0031214)	47	4	0.24	0	16.49	0.000133	0.0281
cardiovascular system development (GO:0072358)	474	10	2.45	0	4.09	0.000171	0.0289
positive regulation of signaling (GO:0023056)	1249	17	6.44	0	2.64	0.000175	0.029
positive regulation of signal transduction (GO:0009967)	1123	16	5.79	0	2.76	0.000169	0.029
bone development (GO:0060348)	152	6	0.78	0	7.65	0.000157	0.029
digestive system development (GO:0055123)	95	5	0.49	0	10.2	0.000159	0.0291
regulation of apoptotic process (GO:0042981)	1237	17	6.38	0	2.66	0.000156	0.0291
regulation of leukocyte differentiation (GO:1902105)	221	7	1.14	0	6.14	0.000164	0.0291
morphogenesis of a branching epithelium (GO:0061138)	155	6	0.8	0	7.5	0.000174	0.0292
regulation of protein import into nucleus (GO:0042306)	154	6	0.79	0	7.55	0.000168	0.0292
positive regulation of fat cell differentiation (GO:0045600)	50	4	0.26	0	15.5	0.000166	0.0292
regulation of Wnt signaling pathway (GO:0030111)	219	7	1.13	0	6.19	0.000155	0.0294
positive regulation of cell communication (GO:0010647)	1242	17	6.41	0	2.65	0.000163	0.0294
vasculature development (GO:0001944)	463	10	2.39	0	4.19	0.000141	0.0295
regulation of oligodendrocyte apoptotic process (GO:1900141)	2	2	0.01	0	> 100	0.000155	0.0297
negative regulation of oligodendrocyte apoptotic process (GO:1900142)	2	2	0.01	0	> 100	0.000155	0.0301
regulation of endopeptidase activity (GO:0052548)	217	7	1.12	0	6.25	0.000147	0.0302
regulation of protein import (GO:1904589)	157	6	0.81	0	7.41	0.000186	0.0305
regulation of planar cell polarity pathway involved in axis elongation (GO:2000040)	2	2	0.01	0	> 100	0.000155	0.0305
negative regulation of planar cell polarity pathway involved in axis elongation (GO:2000041)	2	2	0.01	0	> 100	0.000155	0.031
system development (GO:0048731)	3051	30	15.74	0	1.91	0.000155	0.0314
morphogenesis of a branching structure (GO:0001763)	159	6	0.82	0	7.31	0.000199	0.0322
response to chemical (GO:0042221)	2351	25	12.13	0	2.06	0.000215	0.0344
positive regulation of Wnt signaling pathway (GO:0030177)	103	5	0.53	0	9.41	0.000229	0.0363
regulation of membrane protein ectodomain proteolysis (GO:0051043)	21	3	0.11	0	27.69	0.000243	0.0381
positive regulation of nucleocytoplasmic transport (GO:0046824)	105	5	0.54	0	9.23	0.000249	0.0387
Wnt signaling pathway involved in somitogenesis (GO:0090244)	3	2	0.02	0	> 100	0.000257	0.0387
negative regulation of B cell differentiation (GO:0045578)	3	2	0.02	0	> 100	0.000257	0.0391
regulation of anatomical structure morphogenesis (GO:0022603)	812	13	4.19	0	3.1	0.000255	0.0391
regulation of cell-substrate adhesion (GO:0010810)	168	6	0.87	0	6.92	0.000265	0.0394
multicellular organismal process (GO:0032501)	4285	37	22.11	0	1.67	0.00027	0.0398
animal organ morphogenesis (GO:0009887)	710	12	3.66	0	3.28	0.00028	0.04
response to X-ray (GO:0010165)	22	3	0.11	0	26.43	0.000275	0.0401
tube morphogenesis (GO:0035239)	323	8	1.67	0	4.8	0.000283	0.0401
positive regulation of biological process (GO:0048518)	4297	37	22.17	0	1.67	0.000278	0.0402
regulation of catenin import into nucleus (GO:0035412)	23	3	0.12	0	25.28	0.00031	0.0422
negative regulation of cell death (GO:0060548)	828	13	4.27	0	3.04	0.000307	0.0423
regulation of bone mineralization (GO:0030500)	59	4	0.3	0	13.14	0.000302	0.0424
multicellular organism development (GO:0007275)	3474	32	17.93	0	1.79	0.000305	0.0424
cardiac chamber morphogenesis (GO:0003206)	114	5	0.59	0	8.5	0.000359	0.0485

## Sheet: F-WntX vs F-SL + F-SH
Analysis Type:	PANTHER Overrepresentation Test (Released 20171205)
Annotation Version and Release Date:	GO Ontology database Released 2017-12-27
Analyzed List:	upload_1 (Mus musculus)
Reference List:	GFP_expressed_genes.txt (Mus musculus)	There are duplicate IDs in the file. The unique set of IDs will be used.
Test Type:	FISHER
GO biological process complete	GFP_expressed_genes.txt - REFLIST (13760)	upload_1 (183)	upload_1 (expected)	upload_1 (over/under)	upload_1 (fold Enrichment)	upload_1 (raw P-value)	upload_1 (FDR)
regulation of cell proliferation (GO:0042127)	1284	51	17.08	0	2.99	1.11e-12	1.61e-08
positive regulation of cell proliferation (GO:0008284)	716	33	9.52	0	3.47	6.99e-10	3.4e-06
negative regulation of multicellular organismal process (GO:0051241)	899	37	11.96	0	3.09	1.13e-09	4.11e-06
negative regulation of developmental process (GO:0051093)	743	33	9.88	0	3.34	1.72e-09	4.17e-06
regulation of developmental process (GO:0050793)	1938	58	25.77	0	2.25	1.61e-09	4.71e-06
negative regulation of cellular process (GO:0048523)	3504	86	46.6	0	1.85	6.56e-10	4.78e-06
regulation of multicellular organismal process (GO:0051239)	2202	61	29.29	0	2.08	1.2e-08	2.5e-05
multicellular organismal process (GO:0032501)	4285	94	56.99	0	1.65	1.95e-08	3.56e-05
negative regulation of biological process (GO:0048519)	3844	87	51.12	0	1.7	2.89e-08	4.68e-05
positive regulation of cellular process (GO:0048522)	3900	86	51.87	0	1.66	1.4e-07	0.000186
positive regulation of biological process (GO:0048518)	4297	92	57.15	0	1.61	1.29e-07	0.000189
negative regulation of response to stimulus (GO:0048585)	1191	39	15.84	0	2.46	2.03e-07	0.000247
regulation of multicellular organismal development (GO:2000026)	1508	45	20.06	0	2.24	3.03e-07	0.000341
regulation of cell differentiation (GO:0045595)	1379	42	18.34	0	2.29	3.91e-07	0.000407
extracellular matrix organization (GO:0030198)	159	13	2.11	0	6.15	4.23e-07	0.000412
extracellular structure organization (GO:0043062)	160	13	2.13	0	6.11	4.53e-07	0.000413
regulation of anatomical structure morphogenesis (GO:0022603)	812	30	10.8	0	2.78	5.15e-07	0.000442
negative regulation of cell communication (GO:0010648)	1015	34	13.5	0	2.52	7.22e-07	0.000585
negative regulation of signaling (GO:0023057)	1018	34	13.54	0	2.51	7.71e-07	0.000592
tissue development (GO:0009888)	1170	37	15.56	0	2.38	8.88e-07	0.000617
animal organ development (GO:0048513)	2118	55	28.17	0	1.95	8.65e-07	0.000631
negative regulation of signal transduction (GO:0009968)	932	32	12.4	0	2.58	9.69e-07	0.000643
regulation of cell migration (GO:0030334)	669	26	8.9	0	2.92	1.33e-06	0.000806
regulation of cellular component movement (GO:0051270)	757	28	10.07	0	2.78	1.27e-06	0.000808
multicellular organism development (GO:0007275)	3474	76	46.2	0	1.64	1.98e-06	0.00115
developmental process (GO:0032502)	3947	83	52.49	0	1.58	2.25e-06	0.00126
regulation of cell motility (GO:2000145)	698	26	9.28	0	2.8	2.82e-06	0.00152
regulation of programmed cell death (GO:0043067)	1253	37	16.66	0	2.22	4.37e-06	0.00228
anatomical structure development (GO:0048856)	3677	78	48.9	0	1.6	4.65e-06	0.00234
negative regulation of apoptotic process (GO:0043066)	727	26	9.67	0	2.69	5.74e-06	0.0027
negative regulation of cell differentiation (GO:0045596)	548	22	7.29	0	3.02	5.69e-06	0.00277
system development (GO:0048731)	3051	68	40.58	0	1.68	6.14e-06	0.0028
negative regulation of cell death (GO:0060548)	828	28	11.01	0	2.54	6.73e-06	0.00298
response to stimulus (GO:0050896)	4809	94	63.96	0	1.47	7.4e-06	0.00309
positive regulation of apoptotic process (GO:0043065)	514	21	6.84	0	3.07	7.3e-06	0.00313
cellular macromolecule metabolic process (GO:0044260)	4654	34	61.9	0	0.55	8.49e-06	0.00326
negative regulation of programmed cell death (GO:0043069)	742	26	9.87	0	2.63	8.16e-06	0.00331
positive regulation of programmed cell death (GO:0043068)	519	21	6.9	0	3.04	8.41e-06	0.00332
regulation of locomotion (GO:0040012)	749	26	9.96	0	2.61	9.58e-06	0.00359
bone development (GO:0060348)	152	11	2.02	0	5.44	1e-05	0.00365
regulation of apoptotic process (GO:0042981)	1237	36	16.45	0	2.19	1.19e-05	0.00423
system process (GO:0003008)	888	29	11.81	0	2.46	1.22e-05	0.00425
cell adhesion (GO:0007155)	580	22	7.71	0	2.85	1.35e-05	0.00456
negative regulation of cell proliferation (GO:0008285)	537	21	7.14	0	2.94	1.38e-05	0.00458
negative regulation of cellular component movement (GO:0051271)	226	13	3.01	0	4.33	1.62e-05	0.00526
biological adhesion (GO:0022610)	589	22	7.83	0	2.81	1.69e-05	0.00537
regulation of cell death (GO:0010941)	1375	38	18.29	0	2.08	1.79e-05	0.00556
epithelium development (GO:0060429)	738	25	9.81	0	2.55	2.16e-05	0.00656
positive regulation of developmental process (GO:0051094)	1095	32	14.56	0	2.2	2.81e-05	0.00804
positive regulation of cell death (GO:0010942)	563	21	7.49	0	2.8	2.72e-05	0.0081
regulation of signal transduction (GO:0009966)	2087	50	27.76	0	1.8	2.81e-05	0.00819
regulation of response to stimulus (GO:0048583)	2690	60	35.78	0	1.68	3.13e-05	0.0088
negative regulation of peptidase activity (GO:0010466)	143	10	1.9	0	5.26	3.37e-05	0.00927
biological regulation (GO:0065007)	8013	134	106.57	0	1.26	4.01e-05	0.0108
negative regulation of cell motility (GO:2000146)	214	12	2.85	0	4.22	4.38e-05	0.0114
sclerotome development (GO:0061056)	3	3	0.04	0	75.19	4.32e-05	0.0115
anatomical structure morphogenesis (GO:0009653)	1615	41	21.48	0	1.91	4.65e-05	0.0119
regulation of cell communication (GO:0010646)	2310	53	30.72	0	1.73	5.9e-05	0.0146
cognition (GO:0050890)	221	12	2.94	0	4.08	5.88e-05	0.0148
negative regulation of endopeptidase activity (GO:0010951)	95	8	1.26	0	6.33	6.21e-05	0.0151
regulation of signaling (GO:0023051)	2331	53	31	0	1.71	6.36e-05	0.0152
lung alveolus development (GO:0048286)	47	6	0.63	0	9.6	6.48e-05	0.0152
regulation of localization (GO:0032879)	2108	49	28.04	0	1.75	7.62e-05	0.0176
regulation of biological process (GO:0050789)	7648	128	101.71	0	1.26	8.99e-05	0.0205
learning or memory (GO:0007611)	199	11	2.65	0	4.16	0.000103	0.0232
regulation of cell-substrate adhesion (GO:0010810)	168	10	2.23	0	4.48	0.00012	0.0259
negative regulation of cell migration (GO:0030336)	202	11	2.69	0	4.09	0.000117	0.0259
positive regulation of nucleocytoplasmic transport (GO:0046824)	105	8	1.4	0	5.73	0.00012	0.026
regulation of cell morphogenesis (GO:0022604)	401	16	5.33	0	3	0.000123	0.0261
behavior (GO:0007610)	445	17	5.92	0	2.87	0.000125	0.0261
negative regulation of locomotion (GO:0040013)	241	12	3.21	0	3.74	0.000129	0.0265
positive regulation of cell-substrate adhesion (GO:0010811)	107	8	1.42	0	5.62	0.000135	0.027
positive regulation of protein kinase B signaling (GO:0051897)	79	7	1.05	0	6.66	0.000134	0.0272
RNA processing (GO:0006396)	679	0	9.03	0	< 0.01	0.000184	0.0358
positive regulation of multicellular organismal process (GO:0051240)	1297	34	17.25	0	1.97	0.000182	0.0359
negative regulation of Wnt signaling pathway (GO:0030178)	113	8	1.5	0	5.32	0.000192	0.0369
macromolecule metabolic process (GO:0043170)	5025	43	66.83	0	0.64	0.000195	0.037
supramolecular fiber organization (GO:0097435)	335	14	4.46	0	3.14	0.000209	0.0391
regulation of Wnt signaling pathway (GO:0030111)	219	11	2.91	0	3.78	0.000229	0.0424
positive regulation of protein import into nucleus (GO:0042307)	88	7	1.17	0	5.98	0.00025	0.0456

## Sheet: F-Act vs F-SL + F-SH
Analysis Type:	PANTHER Overrepresentation Test (Released 20171205)
Annotation Version and Release Date:	GO Ontology database Released 2017-12-27
Analyzed List:	upload_1 (Mus musculus)
Reference List:	GFP_expressed_genes.txt (Mus musculus)	There are duplicate IDs in the file. The unique set of IDs will be used.
Test Type:	FISHER
GO biological process complete	GFP_expressed_genes.txt - REFLIST (13760)	upload_1 (92)	upload_1 (expected)	upload_1 (over/under)	upload_1 (fold Enrichment)	upload_1 (raw P-value)	upload_1 (FDR)
supramolecular fiber organization (GO:0097435)	335	17	2.24	0	7.59	1.3e-10	1.9e-06
extracellular structure organization (GO:0043062)	160	12	1.07	0	11.22	1.4e-09	6.82e-06
extracellular matrix organization (GO:0030198)	159	12	1.06	0	11.29	1.31e-09	9.57e-06
collagen fibril organization (GO:0030199)	39	7	0.26	0	26.85	1.96e-08	7.15e-05
regulation of cellular component movement (GO:0051270)	757	20	5.06	0	3.95	1.35e-07	0.000246
negative regulation of multicellular organismal process (GO:0051241)	899	22	6.01	0	3.66	1.04e-07	0.000253
animal organ development (GO:0048513)	2118	35	14.16	0	2.47	1.23e-07	0.000257
negative regulation of developmental process (GO:0051093)	743	20	4.97	0	4.03	1e-07	0.000292
system development (GO:0048731)	3051	43	20.4	0	2.11	2.17e-07	0.000351
anatomical structure development (GO:0048856)	3677	48	24.58	0	1.95	3.29e-07	0.00048
regulation of cell migration (GO:0030334)	669	18	4.47	0	4.02	4.92e-07	0.000652
regulation of locomotion (GO:0040012)	749	19	5.01	0	3.79	5.39e-07	0.000655
regulation of wound healing (GO:0061041)	107	8	0.72	0	11.18	9.2e-07	0.000959
negative regulation of cell-substrate adhesion (GO:0010812)	45	6	0.3	0	19.94	1.03e-06	0.001
regulation of cell motility (GO:2000145)	698	18	4.67	0	3.86	8.96e-07	0.00101
developmental process (GO:0032502)	3947	49	26.39	0	1.86	1.19e-06	0.00108
multicellular organism development (GO:0007275)	3474	45	23.23	0	1.94	1.46e-06	0.00125
tissue development (GO:0009888)	1170	23	7.82	0	2.94	2.23e-06	0.00171
multicellular organismal process (GO:0032501)	4285	51	28.65	0	1.78	2.21e-06	0.00179
regulation of peptidase activity (GO:0052547)	273	11	1.83	0	6.03	2.73e-06	0.002
regulation of response to wounding (GO:1903034)	134	8	0.9	0	8.93	4.51e-06	0.00313
response to chemical (GO:0042221)	2351	34	15.72	0	2.16	5.11e-06	0.00339
negative regulation of cellular process (GO:0048523)	3504	44	23.43	0	1.88	5.55e-06	0.00352
regulation of developmental process (GO:0050793)	1938	30	12.96	0	2.32	6.42e-06	0.00391
regulation of blood coagulation (GO:0030193)	65	6	0.43	0	13.81	7.37e-06	0.00414
regulation of hemostasis (GO:1900046)	65	6	0.43	0	13.81	7.37e-06	0.0043
cell adhesion (GO:0007155)	580	15	3.88	0	3.87	7.99e-06	0.00432
biological adhesion (GO:0022610)	589	15	3.94	0	3.81	9.56e-06	0.00481
regulation of coagulation (GO:0050818)	68	6	0.45	0	13.2	9.38e-06	0.00489
regulation of multicellular organismal process (GO:0051239)	2202	32	14.72	0	2.17	1.08e-05	0.00527
regulation of collagen metabolic process (GO:0010712)	41	5	0.27	0	18.24	1.28e-05	0.00603
regulation of multicellular organismal metabolic process (GO:0044246)	42	5	0.28	0	17.81	1.43e-05	0.0065
regulation of endopeptidase activity (GO:0052548)	217	9	1.45	0	6.2	1.88e-05	0.00829
regulation of cell-substrate adhesion (GO:0010810)	168	8	1.12	0	7.12	2.17e-05	0.00933
negative regulation of mitochondrion organization (GO:0010823)	47	5	0.31	0	15.91	2.35e-05	0.00981
nitrogen compound metabolic process (GO:0006807)	5570	18	37.24	0	0.48	2.57e-05	0.0104
circulatory system development (GO:0072359)	732	16	4.89	0	3.27	2.98e-05	0.0117
cellular macromolecule metabolic process (GO:0044260)	4654	13	31.12	0	0.42	3.19e-05	0.0123
regulation of cell proliferation (GO:0042127)	1284	22	8.58	0	2.56	3.32e-05	0.0124
positive regulation of cellular component movement (GO:0051272)	437	12	2.92	0	4.11	4.02e-05	0.0143
positive regulation of collagen metabolic process (GO:0010714)	26	4	0.17	0	23.01	4.38e-05	0.0145
skeletal system development (GO:0001501)	367	11	2.45	0	4.48	4.01e-05	0.0146
positive regulation of multicellular organismal metabolic process (GO:0044253)	26	4	0.17	0	23.01	4.38e-05	0.0148
positive regulation of collagen biosynthetic process (GO:0032967)	26	4	0.17	0	23.01	4.38e-05	0.0152
positive regulation of locomotion (GO:0040017)	450	12	3.01	0	3.99	5.3e-05	0.0172
negative regulation of cell-matrix adhesion (GO:0001953)	28	4	0.19	0	21.37	5.68e-05	0.018
negative regulation of biological process (GO:0048519)	3844	44	25.7	0	1.71	5.88e-05	0.0182
negative regulation of peptidase activity (GO:0010466)	143	7	0.96	0	7.32	6.16e-05	0.0187
regulation of multicellular organismal development (GO:2000026)	1508	24	10.08	0	2.38	6.37e-05	0.019
vasculature development (GO:0001944)	463	12	3.1	0	3.88	6.91e-05	0.0202
macromolecule metabolic process (GO:0043170)	5025	16	33.6	0	0.48	7.74e-05	0.0217
negative regulation of cell development (GO:0010721)	262	9	1.75	0	5.14	7.74e-05	0.0221
negative regulation of cell differentiation (GO:0045596)	548	13	3.66	0	3.55	8.13e-05	0.0224
positive regulation of cell proliferation (GO:0008284)	716	15	4.79	0	3.13	8.72e-05	0.0231
cardiovascular system development (GO:0072358)	474	12	3.17	0	3.79	8.6e-05	0.0232
regulation of signal transduction (GO:0009966)	2087	29	13.95	0	2.08	0.000102	0.0266
response to organic substance (GO:0010033)	1763	26	11.79	0	2.21	0.000111	0.0285
lung development (GO:0030324)	161	7	1.08	0	6.5	0.000126	0.0311
positive regulation of cell migration (GO:0030335)	418	11	2.79	0	3.94	0.000124	0.0313
respiratory tube development (GO:0030323)	164	7	1.1	0	6.38	0.00014	0.0341
positive regulation of cell motility (GO:2000147)	427	11	2.85	0	3.85	0.000149	0.0352
regulation of collagen biosynthetic process (GO:0032965)	37	4	0.25	0	16.17	0.000153	0.0354
regulation of cell differentiation (GO:0045595)	1379	22	9.22	0	2.39	0.000149	0.0356
positive regulation of glial cell proliferation (GO:0060252)	14	3	0.09	0	32.05	0.00018	0.0405
blood vessel development (GO:0001568)	436	11	2.92	0	3.77	0.000178	0.0407

## Sheet: F-Cyc vs F-SL + F-SH
Analysis Type:	PANTHER Overrepresentation Test (Released 20171205)
Annotation Version and Release Date:	GO Ontology database Released 2017-12-27
Analyzed List:	upload_1 (Mus musculus)
Reference List:	GFP_expressed_genes.txt (Mus musculus)	There are duplicate IDs in the file. The unique set of IDs will be used.
Test Type:	FISHER
GO biological process complete	GFP_expressed_genes.txt - REFLIST (13760)	upload_1 (504)	upload_1 (expected)	upload_1 (over/under)	upload_1 (fold Enrichment)	upload_1 (raw P-value)	upload_1 (FDR)
cellular process (GO:0009987)	9945	439	364.26	0	1.21	4.67e-15	6.81e-11
translation (GO:0006412)	294	43	10.77	0	3.99	2.23e-13	1.63e-09
peptide biosynthetic process (GO:0043043)	307	43	11.24	0	3.82	8.29e-13	4.03e-09
cellular component organization or biogenesis (GO:0071840)	4024	222	147.39	0	1.51	5.25e-12	1.92e-08
amide biosynthetic process (GO:0043604)	359	45	13.15	0	3.42	7.48e-12	2.18e-08
peptide metabolic process (GO:0006518)	408	48	14.94	0	3.21	1.11e-11	2.71e-08
mitotic cell cycle (GO:0000278)	429	49	15.71	0	3.12	1.75e-11	3.66e-08
cell division (GO:0051301)	433	49	15.86	0	3.09	2.37e-11	4.32e-08
macromolecular complex subunit organization (GO:0043933)	1218	93	44.61	0	2.08	5.18e-11	8.41e-08
cellular component organization (GO:0016043)	3856	211	141.24	0	1.49	6.76e-11	9.87e-08
mitotic cell cycle process (GO:1903047)	379	44	13.88	0	3.17	1.25e-10	1.66e-07
protein folding (GO:0006457)	141	26	5.16	0	5.03	1.8e-10	2.19e-07
cellular amide metabolic process (GO:0043603)	512	51	18.75	0	2.72	5.87e-10	6.12e-07
organonitrogen compound biosynthetic process (GO:1901566)	915	74	33.51	0	2.21	5.64e-10	6.33e-07
cell cycle process (GO:0022402)	628	57	23	0	2.48	1.63e-09	1.49e-06
cell cycle (GO:0007049)	971	76	35.57	0	2.14	1.56e-09	1.52e-06
posttranscriptional regulation of gene expression (GO:0010608)	349	39	12.78	0	3.05	3.95e-09	3.39e-06
regulation of apoptotic process (GO:0042981)	1237	87	45.31	0	1.92	1.13e-08	9.18e-06
ribonucleoprotein complex biogenesis (GO:0022613)	365	39	13.37	0	2.92	1.22e-08	9.39e-06
RNA localization (GO:0006403)	153	24	5.6	0	4.28	1.53e-08	1.12e-05
translational initiation (GO:0006413)	56	15	2.05	0	7.31	2.01e-08	1.39e-05
regulation of programmed cell death (GO:0043067)	1253	87	45.89	0	1.9	2.19e-08	1.45e-05
regulation of cell death (GO:0010941)	1375	92	50.36	0	1.83	3.52e-08	2.23e-05
organelle organization (GO:0006996)	2454	141	89.88	0	1.57	3.77e-08	2.29e-05
supramolecular fiber organization (GO:0097435)	335	36	12.27	0	2.93	3.98e-08	2.32e-05
cellular component biogenesis (GO:0044085)	1898	116	69.52	0	1.67	4.94e-08	2.77e-05
chromosome segregation (GO:0007059)	219	28	8.02	0	3.49	5.27e-08	2.85e-05
ribonucleoprotein complex assembly (GO:0022618)	181	25	6.63	0	3.77	7.26e-08	3.79e-05
macromolecular complex assembly (GO:0065003)	1071	76	39.23	0	1.94	9.74e-08	4.9e-05
chaperone-mediated protein folding (GO:0061077)	55	14	2.01	0	6.95	1.02e-07	4.98e-05
negative regulation of biological process (GO:0048519)	3844	197	140.8	0	1.4	1.13e-07	5.3e-05
nucleoside triphosphate metabolic process (GO:0009141)	186	25	6.81	0	3.67	1.16e-07	5.31e-05
nucleotide metabolic process (GO:0009117)	352	36	12.89	0	2.79	1.23e-07	5.46e-05
nucleoside monophosphate metabolic process (GO:0009123)	174	24	6.37	0	3.77	1.36e-07	5.83e-05
ribonucleoprotein complex subunit organization (GO:0071826)	189	25	6.92	0	3.61	1.54e-07	6.22e-05
negative regulation of cell death (GO:0060548)	828	63	30.33	0	2.08	1.52e-07	6.35e-05
regulation of translation (GO:0006417)	293	32	10.73	0	2.98	1.65e-07	6.5e-05
regulation of cellular amide metabolic process (GO:0034248)	327	34	11.98	0	2.84	1.96e-07	6.8e-05
regulation of protein localization to Cajal body (GO:1904869)	7	7	0.26	0	27.3	1.83e-07	6.83e-05
nucleoside phosphate metabolic process (GO:0006753)	359	36	13.15	0	2.74	1.92e-07	6.85e-05
RNA splicing (GO:0008380)	295	32	10.81	0	2.96	1.9e-07	6.92e-05
positive regulation of protein localization to Cajal body (GO:1904871)	7	7	0.26	0	27.3	1.83e-07	7.01e-05
cellular nitrogen compound metabolic process (GO:0034641)	3530	183	129.3	0	1.42	2.12e-07	7.21e-05
negative regulation of apoptotic process (GO:0043066)	727	57	26.63	0	2.14	2.22e-07	7.35e-05
positive regulation of telomerase RNA localization to Cajal body (GO:1904874)	14	8	0.51	0	15.6	4.75e-07	0.000154
negative regulation of programmed cell death (GO:0043069)	742	57	27.18	0	2.1	5.05e-07	0.00016
cellular component assembly (GO:0022607)	1704	103	62.41	0	1.65	5.44e-07	0.000165
cell cycle phase transition (GO:0044770)	122	19	4.47	0	4.25	5.39e-07	0.000167
mitotic cell cycle phase transition (GO:0044772)	113	18	4.14	0	4.35	8e-07	0.00022
purine nucleoside monophosphate metabolic process (GO:0009126)	165	22	6.04	0	3.64	7.59e-07	0.000221
positive regulation of cellular component organization (GO:0051130)	1055	72	38.64	0	1.86	7.91e-07	0.000222
nucleobase-containing small molecule metabolic process (GO:0055086)	415	38	15.2	0	2.5	7.81e-07	0.000223
mitotic nuclear division (GO:0140014)	126	19	4.62	0	4.12	8.34e-07	0.000225
purine ribonucleoside monophosphate metabolic process (GO:0009167)	165	22	6.04	0	3.64	7.59e-07	0.000226
negative regulation of cellular process (GO:0048523)	3504	179	128.34	0	1.39	9.98e-07	0.00026
nucleotide biosynthetic process (GO:0009165)	141	20	5.16	0	3.87	1.02e-06	0.000261
ribonucleoside monophosphate metabolic process (GO:0009161)	168	22	6.15	0	3.58	9.97e-07	0.000264
positive regulation of translation (GO:0045727)	104	17	3.81	0	4.46	1.18e-06	0.000296
positive regulation of biological process (GO:0048518)	4297	210	157.39	0	1.33	1.27e-06	0.000314
nucleoside phosphate biosynthetic process (GO:1901293)	144	20	5.27	0	3.79	1.37e-06	0.000333
regulation of telomerase RNA localization to Cajal body (GO:1904872)	17	8	0.62	0	12.85	1.46e-06	0.00035
cytoskeleton organization (GO:0007010)	784	57	28.72	0	1.98	1.83e-06	0.00043
sperm-egg recognition (GO:0035036)	18	8	0.66	0	12.13	2.05e-06	0.000467
chromosome organization (GO:0051276)	765	56	28.02	0	2	2.08e-06	0.000467
binding of sperm to zona pellucida (GO:0007339)	18	8	0.66	0	12.13	2.05e-06	0.000474
mRNA processing (GO:0006397)	364	34	13.33	0	2.55	2.35e-06	0.000491
sister chromatid segregation (GO:0000819)	110	17	4.03	0	4.22	2.34e-06	0.000494
de novo' protein folding (GO:0006458)	34	10	1.25	0	8.03	2.33e-06	0.000501
positive regulation of cellular process (GO:0048522)	3900	193	142.85	0	1.35	2.27e-06	0.000503
regulation of DNA biosynthetic process (GO:2000278)	98	16	3.59	0	4.46	2.46e-06	0.000505
cytoplasmic translation (GO:0002181)	43	11	1.58	0	6.98	2.32e-06	0.000505
cellular macromolecular complex assembly (GO:0034622)	597	47	21.87	0	2.15	2.8e-06	0.000568
spindle organization (GO:0007051)	112	17	4.1	0	4.14	2.91e-06	0.000573
purine ribonucleoside triphosphate metabolic process (GO:0009205)	166	21	6.08	0	3.45	2.88e-06	0.000576
cell-cell recognition (GO:0009988)	27	9	0.99	0	9.1	3.21e-06	0.000624
nucleoside diphosphate metabolic process (GO:0009132)	55	12	2.01	0	5.96	3.39e-06	0.000651
ribonucleoside triphosphate metabolic process (GO:0009199)	169	21	6.19	0	3.39	3.72e-06	0.000704
nucleobase-containing compound transport (GO:0015931)	155	20	5.68	0	3.52	3.78e-06	0.000708
mitotic sister chromatid segregation (GO:0000070)	90	15	3.3	0	4.55	4.04e-06	0.000747
ATP metabolic process (GO:0046034)	142	19	5.2	0	3.65	4.1e-06	0.000748
RNA splicing	via transesterification reactions with bulged adenosine as nucleophile (GO:0000377)	157	20	5.75	0	3.48	4.51e-06	0.000792
mRNA splicing	via spliceosome (GO:0000398)	157	20	5.75	0	3.48	4.51e-06	0.000802
positive regulation of establishment of protein localization to telomere (GO:1904851)	8	6	0.29	0	20.48	4.45e-06	0.000803
regulation of mRNA splicing	via spliceosome (GO:0048024)	68	13	2.49	0	5.22	4.78e-06	0.00083
RNA splicing	via transesterification reactions (GO:0000375)	158	20	5.79	0	3.46	4.91e-06	0.000844
ribonucleotide metabolic process (GO:0009259)	249	26	9.12	0	2.85	5.09e-06	0.000864
positive regulation of organelle organization (GO:0010638)	541	43	19.82	0	2.17	5.24e-06	0.000879
purine nucleoside triphosphate metabolic process (GO:0009144)	174	21	6.37	0	3.3	5.61e-06	0.000931
nucleic acid transport (GO:0050657)	133	18	4.87	0	3.69	6.36e-06	0.00103
RNA transport (GO:0050658)	133	18	4.87	0	3.69	6.36e-06	0.00104
regulation of mRNA metabolic process (GO:1903311)	176	21	6.45	0	3.26	6.59e-06	0.00106
cellular response to interleukin-4 (GO:0071353)	22	8	0.81	0	9.93	6.77e-06	0.00107
nucleoside monophosphate biosynthetic process (GO:0009124)	60	12	2.2	0	5.46	7.4e-06	0.00113
positive regulation of cellular amide metabolic process (GO:0034250)	121	17	4.43	0	3.84	7.36e-06	0.00113
regulation of establishment of protein localization to telomere (GO:0070203)	9	6	0.33	0	18.2	7.2e-06	0.00113
mRNA metabolic process (GO:0016071)	475	39	17.4	0	2.24	7.35e-06	0.00114
establishment of RNA localization (GO:0051236)	135	18	4.94	0	3.64	7.66e-06	0.00115
nuclear chromosome segregation (GO:0098813)	164	20	6.01	0	3.33	8.14e-06	0.00121
purine ribonucleotide metabolic process (GO:0009150)	242	25	8.86	0	2.82	9.15e-06	0.00135
positive regulation of molecular function (GO:0044093)	1152	73	42.2	0	1.73	1.02e-05	0.00149
ribose phosphate metabolic process (GO:0019693)	260	26	9.52	0	2.73	1.03e-05	0.00149
regulation of establishment of protein localization to chromosome (GO:0070202)	10	6	0.37	0	16.38	1.12e-05	0.0016
regulation of cellular component organization (GO:0051128)	2051	113	75.12	0	1.5	1.16e-05	0.0016
positive regulation of DNA biosynthetic process (GO:2000573)	63	12	2.31	0	5.2	1.14e-05	0.0016
positive regulation of cell cycle (GO:0045787)	295	28	10.81	0	2.59	1.16e-05	0.00161
response to interleukin-4 (GO:0070670)	24	8	0.88	0	9.1	1.14e-05	0.00162
cytokinesis (GO:0000910)	75	13	2.75	0	4.73	1.22e-05	0.00166
ribonucleoside diphosphate metabolic process (GO:0009185)	43	10	1.58	0	6.35	1.38e-05	0.00186
protein complex subunit organization (GO:0071822)	880	59	32.23	0	1.83	1.42e-05	0.0019
ribosome biogenesis (GO:0042254)	249	25	9.12	0	2.74	1.43e-05	0.0019
regulation of organelle organization (GO:0033043)	1066	68	39.05	0	1.74	1.58e-05	0.00208
positive regulation of protein localization to chromosome	telomeric region (GO:1904816)	11	6	0.4	0	14.89	1.68e-05	0.00218
RNA processing (GO:0006396)	679	49	24.87	0	1.97	1.78e-05	0.00224
regulation of protein metabolic process (GO:0051246)	2074	113	75.97	0	1.49	1.74e-05	0.00225
nucleoside triphosphate biosynthetic process (GO:0009142)	55	11	2.01	0	5.46	1.78e-05	0.00225
cell redox homeostasis (GO:0045454)	55	11	2.01	0	5.46	1.78e-05	0.00227
purine nucleotide metabolic process (GO:0006163)	255	25	9.34	0	2.68	2.07e-05	0.00258
regulation of apoptotic signaling pathway (GO:2001233)	356	31	13.04	0	2.38	3.08e-05	0.00381
cellular nitrogen compound biosynthetic process (GO:0044271)	2171	116	79.52	0	1.46	3.22e-05	0.00394
deoxyribonucleotide biosynthetic process (GO:0009263)	13	6	0.48	0	12.6	3.46e-05	0.00414
regulation of protein localization to chromosome	telomeric region (GO:1904814)	13	6	0.48	0	12.6	3.46e-05	0.00417
regulation of macromolecule metabolic process (GO:0060255)	4364	205	159.84	0	1.28	3.45e-05	0.00419
deoxyribonucleotide metabolic process (GO:0009262)	29	8	1.06	0	7.53	3.59e-05	0.00419
regulation of cell-substrate adhesion (GO:0010810)	168	19	6.15	0	3.09	3.54e-05	0.0042
spliceosomal snRNP assembly (GO:0000387)	29	8	1.06	0	7.53	3.59e-05	0.00423
microtubule-based process (GO:0007017)	495	38	18.13	0	2.1	3.69e-05	0.00428
response to stress (GO:0006950)	2220	118	81.31	0	1.45	3.73e-05	0.00429
positive regulation of macromolecule metabolic process (GO:0010604)	2393	125	87.65	0	1.43	3.83e-05	0.00436
collagen fibril organization (GO:0030199)	39	9	1.43	0	6.3	3.92e-05	0.00443
ribosome assembly (GO:0042255)	61	11	2.23	0	4.92	4.13e-05	0.00463
regulation of chromosome segregation (GO:0051983)	86	13	3.15	0	4.13	4.41e-05	0.00492
DNA packaging (GO:0006323)	113	15	4.14	0	3.62	4.56e-05	0.00504
regulation of mRNA processing (GO:0050684)	100	14	3.66	0	3.82	4.83e-05	0.0053
cytoskeleton-dependent cytokinesis (GO:0061640)	51	10	1.87	0	5.35	4.95e-05	0.00539
protein stabilization (GO:0050821)	143	17	5.24	0	3.25	5.15e-05	0.00556
positive regulation of mitotic cell cycle (GO:0045931)	129	16	4.72	0	3.39	5.38e-05	0.00574
purine-containing compound metabolic process (GO:0072521)	284	26	10.4	0	2.5	5.45e-05	0.00576
positive regulation of telomere maintenance via telomere lengthening (GO:1904358)	31	8	1.14	0	7.05	5.38e-05	0.00577
regulation of multi-organism process (GO:0043900)	305	27	11.17	0	2.42	5.67e-05	0.00595
regulation of telomere maintenance (GO:0032204)	76	12	2.78	0	4.31	5.93e-05	0.00618
DNA conformation change (GO:0071103)	145	17	5.31	0	3.2	6.03e-05	0.00624
purine nucleoside monophosphate biosynthetic process (GO:0009127)	53	10	1.94	0	5.15	6.58e-05	0.00672
purine ribonucleoside monophosphate biosynthetic process (GO:0009168)	53	10	1.94	0	5.15	6.58e-05	0.00677
nuclear division (GO:0000280)	226	22	8.28	0	2.66	7.09e-05	0.00713
regulation of RNA splicing (GO:0043484)	104	14	3.81	0	3.68	7.09e-05	0.00718
mitotic cytokinesis (GO:0000281)	43	9	1.58	0	5.71	7.59e-05	0.00753
regulation of telomere maintenance via telomere lengthening (GO:1904356)	54	10	1.98	0	5.06	7.56e-05	0.00756
negative regulation of translation (GO:0017148)	119	15	4.36	0	3.44	7.77e-05	0.00766
wound healing (GO:0042060)	213	21	7.8	0	2.69	8.73e-05	0.0085
regulation of ubiquitin protein ligase activity (GO:1904666)	16	6	0.59	0	10.24	8.69e-05	0.00851
regulation of ubiquitin-protein transferase activity (GO:0051438)	44	9	1.61	0	5.58	8.86e-05	0.00856
ADP metabolic process (GO:0046031)	34	8	1.25	0	6.42	9.4e-05	0.00902
ribonucleoside monophosphate biosynthetic process (GO:0009156)	56	10	2.05	0	4.88	9.88e-05	0.00943
detoxification (GO:0098754)	25	7	0.92	0	7.64	0.000103	0.00975
negative regulation of mRNA metabolic process (GO:1903312)	69	11	2.53	0	4.35	0.000111	0.0104
regulation of telomere maintenance via telomerase (GO:0032210)	46	9	1.68	0	5.34	0.000119	0.0111
response to wounding (GO:0009611)	264	24	9.67	0	2.48	0.000119	0.0111
regulation of symbiosis	encompassing mutualism through parasitism (GO:0043903)	170	18	6.23	0	2.89	0.000122	0.0113
regulation of DNA metabolic process (GO:0051052)	358	29	13.11	0	2.21	0.000129	0.0118
regulation of biological quality (GO:0065008)	2603	131	95.34	0	1.37	0.000136	0.0124
negative regulation of developmental process (GO:0051093)	743	49	27.21	0	1.8	0.000141	0.0128
nucleocytoplasmic transport (GO:0006913)	189	19	6.92	0	2.74	0.000149	0.0134
nitrogen compound metabolic process (GO:0006807)	5570	247	204.02	0	1.21	0.000151	0.0134
drug metabolic process (GO:0017144)	342	28	12.53	0	2.24	0.000151	0.0135
pyrimidine deoxyribonucleotide metabolic process (GO:0009219)	11	5	0.4	0	12.41	0.000171	0.0148
negative regulation of gene expression (GO:0010629)	1262	73	46.22	0	1.58	0.000169	0.0148
extracellular matrix organization (GO:0030198)	159	17	5.82	0	2.92	0.000168	0.0149
microtubule cytoskeleton organization involved in mitosis (GO:1902850)	86	12	3.15	0	3.81	0.00017	0.0149
ribonucleotide biosynthetic process (GO:0009260)	100	13	3.66	0	3.55	0.000175	0.0151
regulation of cell cycle process (GO:0010564)	470	35	17.22	0	2.03	0.000178	0.0153
microtubule cytoskeleton organization (GO:0000226)	347	28	12.71	0	2.2	0.00018	0.0153
toxin transport (GO:1901998)	38	8	1.39	0	5.75	0.000184	0.0153
positive regulation of viral life cycle (GO:1903902)	49	9	1.79	0	5.01	0.000182	0.0154
extracellular structure organization (GO:0043062)	160	17	5.86	0	2.9	0.00018	0.0154
regulation of lamellipodium organization (GO:1902743)	38	8	1.39	0	5.75	0.000184	0.0154
positive regulation of lamellipodium assembly (GO:0010592)	19	6	0.7	0	8.62	0.000189	0.0155
positive regulation of telomere maintenance via telomerase (GO:0032212)	28	7	1.03	0	6.83	0.000188	0.0156
negative regulation of cellular amide metabolic process (GO:0034249)	131	15	4.8	0	3.13	0.000205	0.0167
positive regulation of metabolic process (GO:0009893)	2577	129	94.39	0	1.37	0.000204	0.0168
ribonucleoprotein complex export from nucleus (GO:0071426)	62	10	2.27	0	4.4	0.000208	0.0169
purine nucleoside diphosphate metabolic process (GO:0009135)	39	8	1.43	0	5.6	0.000214	0.0171
purine ribonucleoside diphosphate metabolic process (GO:0009179)	39	8	1.43	0	5.6	0.000214	0.0172
nucleoside diphosphate phosphorylation (GO:0006165)	39	8	1.43	0	5.6	0.000214	0.0173
positive regulation of protein metabolic process (GO:0051247)	1257	72	46.04	0	1.56	0.000228	0.018
ribose phosphate biosynthetic process (GO:0046390)	103	13	3.77	0	3.45	0.000228	0.018
ribonucleoprotein complex localization (GO:0071166)	63	10	2.31	0	4.33	0.000233	0.0183
regulation of attachment of spindle microtubules to kinetochore (GO:0051988)	12	5	0.44	0	11.38	0.000235	0.0183
signaling (GO:0023052)	2839	71	103.99	0	0.68	0.000244	0.019
regulation of cellular protein metabolic process (GO:0032268)	1923	101	70.44	0	1.43	0.000258	0.0198
interspecies interaction between organisms (GO:0044419)	198	19	7.25	0	2.62	0.000257	0.0199
positive regulation of viral genome replication (GO:0045070)	30	7	1.1	0	6.37	0.00027	0.0206
positive regulation of catalytic activity (GO:0043085)	867	54	31.76	0	1.7	0.000282	0.0214
nucleotide phosphorylation (GO:0046939)	41	8	1.5	0	5.33	0.000289	0.0219
mitotic spindle organization (GO:0007052)	65	10	2.38	0	4.2	0.000292	0.022
actin cytoskeleton organization (GO:0030036)	375	29	13.74	0	2.11	0.000296	0.0222
cellular metabolic process (GO:0044237)	6001	261	219.8	0	1.19	0.000302	0.0225
regulation of wound healing (GO:0061041)	107	13	3.92	0	3.32	0.000319	0.0235
regulation of viral life cycle (GO:1903900)	107	13	3.92	0	3.32	0.000319	0.0236
organonitrogen compound metabolic process (GO:1901564)	3479	164	127.43	0	1.29	0.000327	0.0239
regulation of viral genome replication (GO:0045069)	66	10	2.42	0	4.14	0.000326	0.0239
cellular protein complex disassembly (GO:0043624)	42	8	1.54	0	5.2	0.000334	0.0242
regulation of developmental process (GO:0050793)	1938	101	70.98	0	1.42	0.000347	0.025
purine-containing compound biosynthetic process (GO:0072522)	108	13	3.96	0	3.29	0.000346	0.025
symbiosis	encompassing mutualism through parasitism (GO:0044403)	187	18	6.85	0	2.63	0.000359	0.0255
purine ribonucleotide biosynthetic process (GO:0009152)	94	12	3.44	0	3.49	0.000358	0.0256
cellular response to chemical stimulus (GO:0070887)	1638	88	60	0	1.47	0.000368	0.026
actin filament-based process (GO:0030029)	418	31	15.31	0	2.02	0.000371	0.0261
organelle fission (GO:0048285)	254	22	9.3	0	2.36	0.000374	0.0262
gene expression (GO:0010467)	2549	126	93.36	0	1.35	0.000385	0.0269
nuclear transport (GO:0051169)	68	10	2.49	0	4.01	0.000404	0.0281
regulation of cell cycle (GO:0051726)	822	51	30.11	0	1.69	0.000414	0.0286
nucleoside diphosphate biosynthetic process (GO:0009133)	7	4	0.26	0	15.6	0.000417	0.0287
regulation of molecular function (GO:0065009)	1925	100	70.51	0	1.42	0.000428	0.0293
negative regulation of mRNA splicing	via spliceosome (GO:0048025)	23	6	0.84	0	7.12	0.000449	0.0303
positive regulation of nitrogen compound metabolic process (GO:0051173)	2314	116	84.76	0	1.37	0.000452	0.0304
positive regulation of cell cycle phase transition (GO:1901989)	69	10	2.53	0	3.96	0.000448	0.0304
positive regulation of transferase activity (GO:0051347)	462	33	16.92	0	1.95	0.000447	0.0305
regulation of nitrogen compound metabolic process (GO:0051171)	4219	192	154.53	0	1.24	0.000487	0.0326
nucleobase-containing compound metabolic process (GO:0006139)	3053	146	111.82	0	1.31	0.000489	0.0326
purine ribonucleoside triphosphate biosynthetic process (GO:0009206)	45	8	1.65	0	4.85	0.000502	0.0333
positive regulation of cellular protein metabolic process (GO:0032270)	1177	67	43.11	0	1.55	0.000507	0.0335
regulation of mitotic cell cycle (GO:0007346)	444	32	16.26	0	1.97	0.000532	0.035
cotranslational protein targeting to membrane (GO:0006613)	15	5	0.55	0	9.1	0.000539	0.0353
deoxyribose phosphate metabolic process (GO:0019692)	24	6	0.88	0	6.83	0.000544	0.0353
2'-deoxyribonucleotide metabolic process (GO:0009394)	24	6	0.88	0	6.83	0.000544	0.0354
interaction with symbiont (GO:0051702)	58	9	2.12	0	4.24	0.000552	0.0355
positive regulation of mitotic cell cycle phase transition (GO:1901992)	58	9	2.12	0	4.24	0.000552	0.0356
purine nucleoside triphosphate biosynthetic process (GO:0009145)	46	8	1.68	0	4.75	0.000572	0.0364
positive regulation of telomere maintenance (GO:0032206)	46	8	1.68	0	4.75	0.000572	0.0366
positive regulation of cell cycle process (GO:0090068)	196	18	7.18	0	2.51	0.0006	0.0377
primary metabolic process (GO:0044238)	5950	257	217.94	0	1.18	0.000598	0.0378
response to cytokine (GO:0034097)	562	38	20.58	0	1.85	0.000597	0.0379
pyrimidine deoxyribonucleotide biosynthetic process (GO:0009221)	8	4	0.29	0	13.65	0.000608	0.0381
ribonucleoside triphosphate biosynthetic process (GO:0009201)	47	8	1.72	0	4.65	0.000649	0.0401
regulation of cell proliferation (GO:0042127)	1284	71	47.03	0	1.51	0.000644	0.0401
positive regulation of ubiquitin-protein transferase activity (GO:0051443)	25	6	0.92	0	6.55	0.000655	0.0401
biological regulation (GO:0065007)	8013	332	293.5	0	1.13	0.000647	0.0402
positive regulation of lamellipodium organization (GO:1902745)	25	6	0.92	0	6.55	0.000655	0.0403
regulation of generation of precursor metabolites and energy (GO:0043467)	87	11	3.19	0	3.45	0.000671	0.041
establishment of chromosome localization (GO:0051303)	60	9	2.2	0	4.1	0.000687	0.0418
regulation of cell differentiation (GO:0045595)	1379	75	50.51	0	1.48	0.000717	0.0433
DNA metabolic process (GO:0006259)	575	38	21.06	0	1.8	0.000717	0.0434
positive regulation of viral process (GO:0048524)	74	10	2.71	0	3.69	0.000734	0.0441
regulation of chromosome organization (GO:0033044)	283	23	10.37	0	2.22	0.000742	0.0444
purine nucleotide biosynthetic process (GO:0006164)	103	12	3.77	0	3.18	0.000753	0.0448
chromosome localization (GO:0050000)	61	9	2.23	0	4.03	0.000764	0.0452
regulation of response to wounding (GO:1903034)	134	14	4.91	0	2.85	0.000762	0.0452
establishment of protein localization (GO:0045184)	1084	62	39.7	0	1.56	0.000785	0.046
actin filament organization (GO:0007015)	167	16	6.12	0	2.62	0.000785	0.0462
regulation of barbed-end actin filament capping (GO:2000812)	3	3	0.11	0	27.3	0.00081	0.0473
intracellular protein transport (GO:0006886)	514	35	18.83	0	1.86	0.000823	0.0476
regulation of metabolic process (GO:0019222)	4699	209	172.11	0	1.21	0.000821	0.0477
spindle assembly (GO:0051225)	62	9	2.27	0	3.96	0.000848	0.0489

## Sheet: MYO vs F-SL + F-SH
Analysis Type:	PANTHER Overrepresentation Test (Released 20171205)
Annotation Version and Release Date:	GO Ontology database Released 2017-12-27
Analyzed List:	upload_1 (Mus musculus)
Reference List:	GFP_expressed_genes.txt (Mus musculus)	There are duplicate IDs in the file. The unique set of IDs will be used.
Test Type:	FISHER
GO biological process complete	GFP_expressed_genes.txt - REFLIST (13760)	upload_1 (256)	upload_1 (expected)	upload_1 (over/under)	upload_1 (fold Enrichment)	upload_1 (raw P-value)	upload_1 (FDR)
anatomical structure morphogenesis (GO:0009653)	1615	81	30.05	0	2.7	6.35e-17	1.85e-13
biological adhesion (GO:0022610)	589	48	10.96	0	4.38	2.71e-17	1.98e-13
cell adhesion (GO:0007155)	580	48	10.79	0	4.45	1.53e-17	2.23e-13
extracellular structure organization (GO:0043062)	160	27	2.98	0	9.07	6.22e-17	2.27e-13
extracellular matrix organization (GO:0030198)	159	27	2.96	0	9.13	5.41e-17	2.63e-13
animal organ development (GO:0048513)	2118	94	39.4	0	2.39	2.14e-16	5.2e-13
supramolecular fiber organization (GO:0097435)	335	34	6.23	0	5.46	5.77e-15	1.2e-11
tissue development (GO:0009888)	1170	64	21.77	0	2.94	7.29e-15	1.33e-11
system development (GO:0048731)	3051	111	56.76	0	1.96	1.12e-13	1.81e-10
skeletal system development (GO:0001501)	367	33	6.83	0	4.83	3.48e-13	5.08e-10
animal organ morphogenesis (GO:0009887)	710	44	13.21	0	3.33	5.6e-12	7.43e-09
multicellular organism development (GO:0007275)	3474	116	64.63	0	1.79	7.44e-12	9.05e-09
anatomical structure development (GO:0048856)	3677	118	68.41	0	1.72	5.34e-11	5.2e-08
multicellular organismal process (GO:0032501)	4285	131	79.72	0	1.64	5.75e-11	5.25e-08
circulatory system development (GO:0072359)	732	43	13.62	0	3.16	5.2e-11	5.42e-08
developmental process (GO:0032502)	3947	124	73.43	0	1.69	5.17e-11	5.8e-08
collagen fibril organization (GO:0030199)	39	11	0.73	0	15.16	1.21e-09	1.04e-06
regulation of developmental process (GO:0050793)	1938	74	36.06	0	2.05	1.29e-09	1.04e-06
regulation of multicellular organismal development (GO:2000026)	1508	62	28.06	0	2.21	2.76e-09	2.12e-06
negative regulation of developmental process (GO:0051093)	743	40	13.82	0	2.89	3.01e-09	2.19e-06
regulation of multicellular organismal process (GO:0051239)	2202	79	40.97	0	1.93	5.39e-09	3.75e-06
anatomical structure formation involved in morphogenesis (GO:0048646)	707	38	13.15	0	2.89	8.22e-09	5e-06
blood vessel development (GO:0001568)	436	29	8.11	0	3.58	7.58e-09	5.03e-06
skeletal system morphogenesis (GO:0048705)	188	19	3.5	0	5.43	7.95e-09	5.04e-06
cardiovascular system development (GO:0072358)	474	30	8.82	0	3.4	1.2e-08	6.98e-06
vasculature development (GO:0001944)	463	29	8.61	0	3.37	2.65e-08	1.49e-05
connective tissue development (GO:0061448)	167	17	3.11	0	5.47	4.52e-08	2.36e-05
cartilage development (GO:0051216)	126	15	2.34	0	6.4	4.39e-08	2.37e-05
blood vessel morphogenesis (GO:0048514)	348	24	6.47	0	3.71	8.59e-08	4.32e-05
lung development (GO:0030324)	161	16	3	0	5.34	1.54e-07	7.49e-05
negative regulation of multicellular organismal process (GO:0051241)	899	41	16.73	0	2.45	1.75e-07	8.23e-05
regulation of cell migration (GO:0030334)	669	34	12.45	0	2.73	1.96e-07	8.4e-05
epithelium development (GO:0060429)	738	36	13.73	0	2.62	2.15e-07	8.47e-05
respiratory system development (GO:0060541)	187	17	3.48	0	4.89	2.04e-07	8.5e-05
ossification (GO:0001503)	209	18	3.89	0	4.63	1.88e-07	8.56e-05
tube development (GO:0035295)	513	29	9.54	0	3.04	2.12e-07	8.57e-05
respiratory tube development (GO:0030323)	164	16	3.05	0	5.24	1.94e-07	8.59e-05
response to wounding (GO:0009611)	264	20	4.91	0	4.07	2.68e-07	0.000103
regulation of cellular response to growth factor stimulus (GO:0090287)	217	18	4.04	0	4.46	3.15e-07	0.000115
positive regulation of cell proliferation (GO:0008284)	716	35	13.32	0	2.63	3.08e-07	0.000115
regulation of cell motility (GO:2000145)	698	34	12.99	0	2.62	5.01e-07	0.000178
regulation of cell differentiation (GO:0045595)	1379	53	25.66	0	2.07	5.7e-07	0.000198
angiogenesis (GO:0001525)	255	19	4.74	0	4	6.81e-07	0.000231
heart development (GO:0007507)	453	26	8.43	0	3.08	7.16e-07	0.000232
bone morphogenesis (GO:0060349)	79	11	1.47	0	7.48	7.09e-07	0.000235
regulation of cell proliferation (GO:0042127)	1284	50	23.89	0	2.09	7.84e-07	0.000249
actin cytoskeleton organization (GO:0030036)	375	23	6.98	0	3.3	1.12e-06	0.00034
actin filament bundle organization (GO:0061572)	50	9	0.93	0	9.68	1.11e-06	0.000346
actin filament organization (GO:0007015)	167	15	3.11	0	4.83	1.24e-06	0.000369
regulation of transforming growth factor beta receptor signaling pathway (GO:0017015)	85	11	1.58	0	6.96	1.36e-06	0.00039
regulation of cellular component movement (GO:0051270)	757	35	14.08	0	2.49	1.36e-06	0.000398
regulation of cellular response to transforming growth factor beta stimulus (GO:1903844)	86	11	1.6	0	6.88	1.51e-06	0.000417
negative regulation of biomineral tissue development (GO:0070168)	15	6	0.28	0	21.5	1.51e-06	0.000424
bone development (GO:0060348)	152	14	2.83	0	4.95	2.15e-06	0.000581
negative regulation of cellular response to growth factor stimulus (GO:0090288)	110	12	2.05	0	5.86	2.33e-06	0.000598
negative regulation of cell differentiation (GO:0045596)	548	28	10.2	0	2.75	2.33e-06	0.000606
negative regulation of cellular process (GO:0048523)	3504	100	65.19	0	1.53	2.29e-06	0.000608
regulation of transmembrane receptor protein serine/threonine kinase signaling pathway (GO:0090092)	177	15	3.29	0	4.56	2.43e-06	0.000611
regulation of ossification (GO:0030278)	178	15	3.31	0	4.53	2.59e-06	0.000641
regulation of locomotion (GO:0040012)	749	34	13.93	0	2.44	2.64e-06	0.000642
negative regulation of biological process (GO:0048519)	3844	106	71.52	0	1.48	4.55e-06	0.00109
wound healing (GO:0042060)	213	16	3.96	0	4.04	4.79e-06	0.00113
cellular response to transforming growth factor beta stimulus (GO:0071560)	99	11	1.84	0	5.97	5.27e-06	0.00122
actin filament-based process (GO:0030029)	418	23	7.78	0	2.96	6.28e-06	0.00143
actin filament bundle assembly (GO:0051017)	47	8	0.87	0	9.15	6.44e-06	0.00144
response to transforming growth factor beta (GO:0071559)	102	11	1.9	0	5.8	6.84e-06	0.00151
regulation of biomineral tissue development (GO:0070167)	65	9	1.21	0	7.44	7.71e-06	0.00168
cell morphogenesis (GO:0000902)	523	26	9.73	0	2.67	8.7e-06	0.00187
cell morphogenesis involved in differentiation (GO:0000904)	399	22	7.42	0	2.96	9.75e-06	0.00206
developmental growth involved in morphogenesis (GO:0060560)	107	11	1.99	0	5.53	1.04e-05	0.00217
negative regulation of transmembrane receptor protein serine/threonine kinase signaling pathway (GO:0090101)	87	10	1.62	0	6.18	1.08e-05	0.00222
collagen metabolic process (GO:0032963)	36	7	0.67	0	10.45	1.15e-05	0.00233
cell differentiation (GO:0030154)	2615	78	48.65	0	1.6	1.31e-05	0.00255
axon development (GO:0061564)	259	17	4.82	0	3.53	1.29e-05	0.00255
tissue morphogenesis (GO:0048729)	470	24	8.74	0	2.74	1.29e-05	0.00258
multicellular organismal macromolecule metabolic process (GO:0044259)	37	7	0.69	0	10.17	1.34e-05	0.00258
regulation of anatomical structure morphogenesis (GO:0022603)	812	34	15.11	0	2.25	1.39e-05	0.00264
negative regulation of transforming growth factor beta receptor signaling pathway (GO:0030512)	53	8	0.99	0	8.11	1.42e-05	0.00265
regulation of signal transduction (GO:0009966)	2087	66	38.83	0	1.7	1.47e-05	0.00271
cellular developmental process (GO:0048869)	2678	79	49.82	0	1.59	1.6e-05	0.00285
neuron differentiation (GO:0030182)	714	31	13.28	0	2.33	1.63e-05	0.00286
cellular component organization or biogenesis (GO:0071840)	4024	108	74.87	0	1.44	1.58e-05	0.00287
negative regulation of cellular response to transforming growth factor beta stimulus (GO:1903845)	54	8	1	0	7.96	1.6e-05	0.00288
cell-cell adhesion (GO:0098609)	265	17	4.93	0	3.45	1.71e-05	0.00297
cellular component organization (GO:0016043)	3856	104	71.74	0	1.45	1.75e-05	0.003
chondrocyte differentiation (GO:0002062)	58	8	1.08	0	7.41	2.55e-05	0.00433
cell development (GO:0048468)	1187	43	22.08	0	1.95	2.96e-05	0.00497
organic cyclic compound metabolic process (GO:1901360)	3296	34	61.32	0	0.55	3.04e-05	0.00504
cellular aromatic compound metabolic process (GO:0006725)	3168	32	58.94	0	0.54	3.19e-05	0.00523
heterocycle metabolic process (GO:0046483)	3145	32	58.51	0	0.55	4.23e-05	0.00686
cellular component morphogenesis (GO:0032989)	605	27	11.26	0	2.4	4.3e-05	0.00689
cardiac chamber development (GO:0003205)	151	12	2.81	0	4.27	4.51e-05	0.00715
elastic fiber assembly (GO:0048251)	8	4	0.15	0	26.88	4.79e-05	0.00737
endochondral bone morphogenesis (GO:0060350)	46	7	0.86	0	8.18	4.7e-05	0.00738
negative regulation of signal transduction (GO:0009968)	932	36	17.34	0	2.08	4.79e-05	0.00744
cell growth (GO:0016049)	107	10	1.99	0	5.02	5.57e-05	0.00847
growth (GO:0040007)	354	19	6.59	0	2.88	5.66e-05	0.00851
negative regulation of canonical Wnt signaling pathway (GO:0090090)	86	9	1.6	0	5.62	5.88e-05	0.00875
sensory organ development (GO:0007423)	390	20	7.26	0	2.76	6.59e-05	0.00971
generation of neurons (GO:0048699)	1185	42	22.05	0	1.91	7.27e-05	0.0103
negative regulation of ossification (GO:0030279)	68	8	1.27	0	6.32	7.16e-05	0.0104
primary metabolic process (GO:0044238)	5950	79	110.7	0	0.71	7.24e-05	0.0104
axonogenesis (GO:0007409)	240	15	4.47	0	3.36	7.1e-05	0.0104
negative regulation of response to stimulus (GO:0048585)	1191	42	22.16	0	1.9	7.69e-05	0.0108
organic substance metabolic process (GO:0071704)	6223	84	115.78	0	0.73	7.86e-05	0.0109
mesenchyme development (GO:0060485)	161	12	3	0	4.01	8.03e-05	0.0111
multicellular organism metabolic process (GO:0044236)	51	7	0.95	0	7.38	8.49e-05	0.0116
regulation of cell growth (GO:0001558)	335	18	6.23	0	2.89	8.77e-05	0.0119
locomotion (GO:0040011)	816	32	15.18	0	2.11	9.11e-05	0.0122
regulation of cartilage development (GO:0061035)	52	7	0.97	0	7.24	9.48e-05	0.0126
regulation of cell communication (GO:0010646)	2310	68	42.98	0	1.58	9.84e-05	0.0129
negative regulation of cell communication (GO:0010648)	1015	37	18.88	0	1.96	0.000105	0.0136
negative regulation of signaling (GO:0023057)	1018	37	18.94	0	1.95	0.000109	0.014
neuron projection morphogenesis (GO:0048812)	341	18	6.34	0	2.84	0.000109	0.014
chondrocyte development (GO:0002063)	22	5	0.41	0	12.22	0.000114	0.014
positive regulation of developmental process (GO:0051094)	1095	39	20.37	0	1.91	0.000111	0.0141
cellular response to growth factor stimulus (GO:0071363)	311	17	5.79	0	2.94	0.000113	0.0141
sclerotome development (GO:0061056)	3	3	0.06	0	53.75	0.000116	0.0142
cytoskeleton organization (GO:0007010)	784	31	14.59	0	2.13	0.000113	0.0142
actin crosslink formation (GO:0051764)	11	4	0.2	0	19.55	0.000127	0.0153
nucleobase-containing compound metabolic process (GO:0006139)	3053	32	56.8	0	0.56	0.000128	0.0153
cellular metabolic process (GO:0044237)	6001	81	111.65	0	0.73	0.000126	0.0153
plasma membrane bounded cell projection morphogenesis (GO:0120039)	346	18	6.44	0	2.8	0.000129	0.0153
trabecula formation (GO:0060343)	23	5	0.43	0	11.68	0.000136	0.016
regulation of cell death (GO:0010941)	1375	46	25.58	0	1.8	0.000139	0.0162
regulation of signaling (GO:0023051)	2331	68	43.37	0	1.57	0.000146	0.0169
cell projection morphogenesis (GO:0048858)	350	18	6.51	0	2.76	0.000148	0.017
cartilage development involved in endochondral bone morphogenesis (GO:0060351)	24	5	0.45	0	11.2	0.000162	0.0182
muscle structure development (GO:0061061)	385	19	7.16	0	2.65	0.000161	0.0183
positive regulation of cell migration (GO:0030335)	418	20	7.78	0	2.57	0.000161	0.0184
response to growth factor (GO:0070848)	322	17	5.99	0	2.84	0.000168	0.0187
morphogenesis of an epithelium (GO:0002009)	390	19	7.26	0	2.62	0.000189	0.0209
embryo development (GO:0009790)	843	32	15.68	0	2.04	0.000195	0.0212
regulation of bone mineralization (GO:0030500)	59	7	1.1	0	6.38	0.000194	0.0213
negative regulation of gastrulation (GO:2000542)	4	3	0.07	0	40.31	0.0002	0.0216
nucleic acid metabolic process (GO:0090304)	2661	27	49.51	0	0.55	0.000211	0.0224
positive regulation of cell motility (GO:2000147)	427	20	7.94	0	2.52	0.000211	0.0225
negative regulation of bone mineralization (GO:0030502)	13	4	0.24	0	16.54	0.000215	0.0225
positive regulation of cell death (GO:0010942)	563	24	10.47	0	2.29	0.000211	0.0226
positive regulation of cell division (GO:0051781)	61	7	1.13	0	6.17	0.000234	0.0244
metabolic process (GO:0008152)	6598	93	122.75	0	0.76	0.000237	0.0246
regulation of response to stimulus (GO:0048583)	2690	75	50.05	0	1.5	0.000243	0.025
chordate embryonic development (GO:0043009)	572	24	10.64	0	2.26	0.000258	0.0263
cellular response to acid chemical (GO:0071229)	131	10	2.44	0	4.1	0.000263	0.0267
heart morphogenesis (GO:0003007)	214	13	3.98	0	3.27	0.000279	0.0281
positive regulation of cellular component movement (GO:0051272)	437	20	8.13	0	2.46	0.000282	0.0282
negative regulation of cell death (GO:0060548)	828	31	15.4	0	2.01	0.000297	0.0292
nitrogen compound metabolic process (GO:0006807)	5570	75	103.63	0	0.72	0.0003	0.0294
actomyosin structure organization (GO:0031032)	85	8	1.58	0	5.06	0.000296	0.0294
cellular response to mechanical stimulus (GO:0071260)	28	5	0.52	0	9.6	0.000305	0.0295
response to chemical (GO:0042221)	2351	67	43.74	0	1.53	0.000304	0.0295
neurogenesis (GO:0022008)	1271	42	23.65	0	1.78	0.000308	0.0296
cell part morphogenesis (GO:0032990)	373	18	6.94	0	2.59	0.000311	0.0297
tendon development (GO:0035989)	5	3	0.09	0	32.25	0.000315	0.0299
regulation of angiogenesis (GO:0045765)	217	13	4.04	0	3.22	0.000317	0.0299
regulation of gastrulation (GO:0010470)	29	5	0.54	0	9.27	0.000353	0.033
neuron projection development (GO:0031175)	511	22	9.51	0	2.31	0.000362	0.0337
cardiac ventricle development (GO:0003231)	112	9	2.08	0	4.32	0.000375	0.0346
positive regulation of apoptotic process (GO:0043065)	514	22	9.56	0	2.3	0.000385	0.0353
negative regulation of Wnt signaling pathway (GO:0030178)	113	9	2.1	0	4.28	0.000398	0.0359
transforming growth factor beta receptor signaling pathway (GO:0007179)	67	7	1.25	0	5.62	0.000396	0.0359
tissue remodeling (GO:0048771)	89	8	1.66	0	4.83	0.000395	0.036
extracellular matrix assembly (GO:0085029)	16	4	0.3	0	13.44	0.000418	0.0372
cardiac chamber morphogenesis (GO:0003206)	114	9	2.12	0	4.24	0.000423	0.0374
collagen catabolic process (GO:0030574)	16	4	0.3	0	13.44	0.000418	0.0374
positive regulation of programmed cell death (GO:0043068)	519	22	9.66	0	2.28	0.000428	0.0376
regulation of canonical Wnt signaling pathway (GO:0060828)	167	11	3.11	0	3.54	0.000432	0.0377
embryo development ending in birth or egg hatching (GO:0009792)	580	24	10.79	0	2.22	0.000442	0.0384
regulation of cell-substrate adhesion (GO:0010810)	168	11	3.13	0	3.52	0.000453	0.0391
negative regulation of cellular component movement (GO:0051271)	226	13	4.2	0	3.09	0.000458	0.0393
sensory organ morphogenesis (GO:0090596)	197	12	3.67	0	3.27	0.000466	0.0396
negative regulation of metallopeptidase activity (GO:1905049)	6	3	0.11	0	26.88	0.000466	0.0398
movement of cell or subcellular component (GO:0006928)	961	34	17.88	0	1.9	0.000476	0.0402
protein heterotrimerization (GO:0070208)	17	4	0.32	0	12.65	0.000509	0.0425
positive regulation of extrinsic apoptotic signaling pathway via death domain receptors (GO:1902043)	17	4	0.32	0	12.65	0.000509	0.0427
developmental growth (GO:0048589)	324	16	6.03	0	2.65	0.000527	0.0437
positive regulation of locomotion (GO:0040017)	450	20	8.37	0	2.39	0.000553	0.0454
enzyme linked receptor protein signaling pathway (GO:0007167)	450	20	8.37	0	2.39	0.000553	0.0456
cell migration (GO:0016477)	600	24	11.16	0	2.15	0.000578	0.0468
negative regulation of cell migration (GO:0030336)	202	12	3.76	0	3.19	0.000576	0.047
cell motility (GO:0048870)	664	26	12.35	0	2.1	0.000605	0.048
bone remodeling (GO:0046849)	33	5	0.61	0	8.14	0.000599	0.0481
neuron development (GO:0048666)	602	24	11.2	0	2.14	0.000597	0.0481
multicellular organismal catabolic process (GO:0044243)	18	4	0.33	0	11.94	0.000614	0.0481
localization of cell (GO:0051674)	664	26	12.35	0	2.1	0.000605	0.0483
peptide cross-linking (GO:0018149)	18	4	0.33	0	11.94	0.000614	0.0484
