# Supplementary material for: Single-cell expression profiling reveals dynamic flux of cardiac stromal, vascular and immune cells in health and injury
Source: eLife journal article supplement (doi:10.7554/elife.43882), 2019-03-26
Supplement: supp [file elife-43882-supp-v1.zip › elife_poa_e43882_Supplementary_File_7.xlsx]

## Sheet: F-Act vs F-SL + F-SH
Gene	pct.1	pct.2	p_val_adj	Log2FoldChange
Postn	0.797	0.233	0	2.86625
Cilp	0.608	0.161	1.75181e-218	2.37497
Col8a1	0.981	0.659	0	2.09583
Ccl2	0.341	0.116	2.16966e-65	2.00072
Timp1	0.785	0.317	6.91096e-226	1.95384
Meox1	0.868	0.341	0	1.79028
Mfap4	0.723	0.357	4.65066e-110	1.24824
Ctgf	0.574	0.114	5.81808e-210	1.22765
Cst6	0.399	0.068	1.05417e-154	1.22739
Prg4	0.615	0.247	1.88304e-105	1.19956
Crlf1	0.385	0.1	1.06859e-105	1.17136
Ckb	0.936	0.675	1.5748e-205	1.16041
Tagln2	0.982	0.794	1.53153e-271	1.14141
Lgals1	1	0.994	0	1.13015
Csrp2	0.792	0.393	3.6151e-156	1.08119
Thbs1	0.547	0.195	2.74138e-114	1.06825
Serpine1	0.635	0.282	1.83806e-96	1.04799
Rbp1	0.975	0.882	4.91292e-191	1.01934
F2r	0.819	0.391	5.38689e-189	0.996178
Fhl2	0.529	0.131	3.35833e-154	0.991887
Acta2	0.345	0.059	8.87703e-109	0.985401
Emp1	0.982	0.812	3.12492e-222	0.973169
Tnfrsf12a	0.643	0.213	6.10818e-164	0.961084
Fxyd5	0.844	0.503	2.31052e-159	0.933681
Spp1	0.292	0.083	1.47074e-62	0.917168
Fstl1	0.999	0.936	2.62355e-248	0.90281
Sh3bgrl3	0.93	0.659	2.8042e-179	0.899924
Tm4sf1	0.92	0.647	7.03282e-154	0.897397
Fibin	0.88	0.581	2.9883e-111	0.891297
Tubb5	0.937	0.74	2.93881e-160	0.889643
Tpm4	0.983	0.79	4.20176e-189	0.859537
Slc25a5	0.915	0.654	4.98302e-154	0.848563
Bgn	1	0.986	3.40623e-300	0.834175
Ier3	0.603	0.269	2.21896e-91	0.822687
Aspn	0.9	0.655	4.19479e-84	0.815589
Fxyd6	0.835	0.595	2.37932e-100	0.814561
Tagln	0.262	0.03	2.8713e-99	0.804143
Mfap5	0.995	0.931	7.0316e-153	0.798531
Ass1	0.379	0.089	6.59423e-102	0.791577
Actn1	0.505	0.115	2.06354e-149	0.78601
Ddah1	0.254	0.01	2.34987e-127	0.781554
Capg	0.887	0.627	7.1934e-129	0.780628
Cyb5r3	0.837	0.529	4.68614e-127	0.779876
Msn	0.83	0.507	2.39851e-130	0.757797
Sparc	1	0.998	9.88883e-184	0.7531
Ltbp2	0.337	0.037	8.6873e-131	0.751193
Vamp5	0.677	0.356	1.29153e-106	0.711928
Cyr61	0.801	0.483	1.45601e-83	0.707614
Mical2	0.5	0.122	4.06992e-136	0.701646
Pmepa1	0.787	0.442	7.00453e-108	0.697645
Cd9	0.959	0.818	4.53689e-76	0.691451
Ldha	0.97	0.839	9.94985e-113	0.68931
Anxa2	0.991	0.923	4.41e-119	0.678291
Myl6	0.997	0.962	6.49874e-146	0.677184
Nme1	0.862	0.586	9.11993e-119	0.676841
Kctd11	0.517	0.196	1.1071e-100	0.663752
Myl12a	1	0.97	9.80293e-161	0.662578
Vcan	0.819	0.494	2.05473e-98	0.652159
Maff	0.548	0.211	5.31051e-98	0.648598
Lmna	0.95	0.775	1.58921e-104	0.643873
Ak1	0.591	0.236	3.51455e-102	0.642674
Frzb	0.655	0.332	1.14166e-80	0.625887
Dap	0.923	0.702	4.27335e-99	0.613013
Tubb2b	0.484	0.174	2.36817e-89	0.611053
Lbh	0.567	0.25	1.37432e-82	0.609563
Loxl2	0.736	0.443	2.88586e-76	0.608558
Adamtsl2	0.452	0.236	4.93123e-47	0.588231
Vim	0.999	0.99	1.73701e-123	0.584846
Wisp2	0.382	0.274	3.49766e-09	0.582916
S100a16	0.959	0.825	2.54531e-85	0.573667
Atp5g1	0.935	0.768	9.63015e-91	0.569736
Eif5a	0.984	0.922	1.41943e-100	0.566548
Sec61b	0.954	0.823	1.51182e-89	0.565939
Dpysl3	0.829	0.577	3.75806e-75	0.5631
Rasl11b	0.429	0.143	1.9368e-83	0.548841
Serpinh1	0.997	0.989	2.75871e-94	0.54492
Col5a2	0.884	0.657	3.56848e-69	0.537956
Tspo	0.991	0.926	2.80582e-92	0.52977
Cfl1	0.979	0.879	7.45536e-84	0.526946
Lox	0.44	0.201	3.90671e-53	0.526122
Dclk1	0.679	0.367	2.6659e-75	0.52053
Pdia6	0.952	0.836	1.18035e-59	0.517403
Tubb6	0.842	0.592	1.12219e-67	0.517313
Hnrnpa1	0.692	0.392	5.42521e-72	0.515444
Txndc5	0.952	0.788	2.58139e-81	0.515203
Apod	0.526	0.34	4.62571e-25	0.512783
Mif	0.845	0.619	8.83844e-61	0.509874
Ptp4a1	0.82	0.565	9.63431e-69	0.50739
Npdc1	0.883	0.647	1.66447e-73	0.506398
Pdgfrl	0.566	0.302	9.23952e-56	0.506095
Crip1	0.999	0.984	4.40692e-54	0.503498
Igfbp7	1	0.999	2.26885e-117	0.502817
Tmem119	0.525	0.253	1.97985e-61	0.502463
Fkbp1a	0.988	0.918	1.3621e-93	0.502324
Fkbp10	0.701	0.414	1.6409e-68	0.501496
Efhd1	0.146	0.253	2.32206e-33	-0.500063
Podn	0.336	0.471	4.82901e-39	-0.50059
Jund	0.993	0.996	3.22378e-40	-0.501844
Malat1	1	1	1.34784e-138	-0.503902
Ar	0.283	0.405	1.84836e-55	-0.504363
Cd302	0.864	0.884	1.4446e-68	-0.507402
Pi16	0.957	0.874	2.004e-31	-0.508807
Rhoj	0.8	0.855	8.49291e-58	-0.510208
Tmem100	0.271	0.336	3.56035e-16	-0.511033
Spon1	0.37	0.472	1.91598e-45	-0.512199
Ms4a4d	0.77	0.833	3.29483e-51	-0.51308
Mmp2	0.894	0.947	8.68947e-57	-0.516308
Ebf1	0.823	0.844	7.63929e-49	-0.516591
Neat1	0.763	0.806	1.21704e-45	-0.519013
Itm2a	0.569	0.63	4.45588e-46	-0.520259
Islr	0.652	0.744	2.39529e-40	-0.520996
Lims2	0.28	0.433	1.72891e-53	-0.525648
Lamc1	0.903	0.924	2.6163e-79	-0.527841
Hes1	0.566	0.645	6.05877e-33	-0.528541
Myoc	0.187	0.301	2.10161e-14	-0.532305
Dpt	0.973	0.973	1.83146e-81	-0.532598
Thbd	0.292	0.418	8.05016e-35	-0.533048
Rpl23a-ps3	0.972	0.973	3.21052e-85	-0.53425
Ackr3	0.269	0.398	5.13805e-38	-0.535831
Rpl10-ps3	0.966	0.973	6.06723e-81	-0.539261
Cpxm1	0.271	0.41	1.66469e-41	-0.544649
Pcolce2	0.816	0.826	1.99842e-56	-0.548498
Smoc2	0.948	0.972	8.72704e-41	-0.549078
Mt1	0.768	0.773	1.59376e-22	-0.558137
Gfra1	0.097	0.272	1.81244e-61	-0.559063
Zfp385a	0.306	0.448	5.21943e-52	-0.562317
Tpst1	0.647	0.725	3.15671e-89	-0.564745
Sept4	0.202	0.318	4.59742e-50	-0.566657
Gm9843	0.916	0.941	2.69412e-89	-0.566834
Aldh2	0.905	0.922	3.06145e-79	-0.568877
Man1a	0.381	0.53	1.945e-75	-0.572605
Dcn	1	1	1.09524e-106	-0.574752
Plpp3	0.786	0.848	2.56537e-54	-0.584378
Rnase4	0.961	0.972	1.20649e-108	-0.596768
Sat1	0.775	0.811	6.76964e-64	-0.599341
Gstt1	0.508	0.643	4.07099e-75	-0.605807
Gfpt2	0.605	0.603	6.18113e-62	-0.606262
Xdh	0.265	0.483	1.04879e-71	-0.609416
Thbs2	0.35	0.478	2.31172e-71	-0.609508
Prss23	0.532	0.612	1.08572e-52	-0.609837
Bmper	0.159	0.362	4.69457e-69	-0.618696
Gm9780	0.575	0.67	5.407e-78	-0.622631
Igfbp4	0.948	0.976	3.80863e-90	-0.624849
Rarres2	0.954	0.976	6.90398e-92	-0.627347
Acaa2	0.374	0.518	4.74774e-88	-0.636444
Slco2b1	0.068	0.277	5.4272e-70	-0.640242
Cdkn1c	0.227	0.414	6.23816e-47	-0.64065
Cxcl1	0.476	0.547	4.06462e-21	-0.661095
Phlda1	0.685	0.754	5.19184e-58	-0.669291
Timp3	0.529	0.745	4.35319e-58	-0.674886
Ypel3	0.785	0.894	3.53801e-101	-0.681612
Fmo2	0.256	0.408	2.12773e-51	-0.684295
C1s1	0.326	0.513	1.95266e-63	-0.687581
Adm	0.292	0.379	1.25619e-25	-0.696166
Serping1	0.99	0.998	1.37468e-181	-0.706342
Crispld2	0.856	0.901	1.04726e-69	-0.709288
Cyp27a1	0.211	0.441	4.23143e-93	-0.71759
Ggt5	0.09	0.338	7.05523e-86	-0.719859
C1ra	0.434	0.597	1.7792e-97	-0.724216
Ramp2	0.668	0.773	2.15439e-110	-0.729166
Mgst1	0.786	0.892	2.45789e-103	-0.731468
Ogn	0.817	0.902	4.7743e-83	-0.731481
Klf9	0.727	0.825	2.5586e-102	-0.744683
Tnxb	0.719	0.863	2.11154e-105	-0.744707
Slc43a3	0.842	0.91	2.87565e-106	-0.766423
Gm12840	0.291	0.33	1.92261e-25	-0.774459
Pgf	0.306	0.542	1.34272e-60	-0.77544
Htra1	0.528	0.72	1.69645e-91	-0.799488
Txnip	0.523	0.674	1.04151e-95	-0.812049
Fbln1	0.7	0.858	2.89598e-98	-0.822453
Nid1	0.874	0.946	3.21621e-147	-0.824398
Penk	0.048	0.26	1.00057e-76	-0.847557
Atp1a2	0.4	0.628	3.59788e-113	-0.866467
Sepp1	0.932	0.978	2.30947e-172	-0.875668
Gas1	0.778	0.924	2.43518e-106	-0.904357
Efemp1	0.081	0.301	8.85623e-91	-0.945838
Pcsk6	0.621	0.799	1.69823e-129	-0.946008
Gsn	0.999	1	2.13548e-188	-0.95196
Selenbp1	0.638	0.818	1.5263e-124	-0.963747
Htra3	0.964	0.998	5.34116e-269	-0.977574
Ces1d	0.109	0.375	5.59774e-98	-0.995887
Gsta3	0.493	0.692	1.90125e-98	-1.02908
Hsd11b1	0.588	0.717	8.77678e-74	-1.02912
G0s2	0.634	0.811	3.74539e-87	-1.04376
Adamts5	0.77	0.907	1.20422e-158	-1.09076
Nmb	0.094	0.336	4.07978e-105	-1.10494
Glul	0.501	0.775	5.02322e-176	-1.10928
Enpp2	0.26	0.597	1.70257e-143	-1.1154
Gstm1	0.931	0.989	4.25357e-229	-1.14412
Scara5	0.283	0.653	7.31125e-164	-1.19003
Ifi205	0.466	0.748	7.18947e-169	-1.27785
Dpep1	0.826	0.952	2.66726e-224	-1.37684
Lpl	0.706	0.868	7.25717e-178	-1.3807
C3	0.446	0.73	2.35799e-160	-1.47243
Apoe	0.65	0.71	7.19989e-82	-1.60565
Cxcl14	0.247	0.339	3.25627e-59	-1.84239
Clec3b	0.726	0.992	0	-1.85064

## Sheet: F-CI vs F-Act
Gene	pct.1	pct.2	p_val_adj	Log2FoldChange
Spp1	0.702	0.292	3.77087e-113	3.11005
Timp1	0.974	0.785	1.38628e-178	2.53364
Cxcl5	0.52	0.053	5.09953e-103	2.3502
Acta2	0.786	0.345	1.39827e-105	2.24251
Cthrc1	0.755	0.148	1.40045e-117	1.90916
Mt2	0.929	0.593	2.23031e-75	1.60665
Mif	0.967	0.845	1.21749e-137	1.48262
Fn1	0.875	0.411	5.50856e-100	1.46461
Gm12840	0.776	0.291	6.03982e-72	1.45013
Ptx3	0.538	0.139	1.1576e-62	1.44331
Tpm2	0.857	0.456	6.23813e-106	1.42113
Angptl4	0.755	0.189	2.51239e-109	1.391
Mt1	0.969	0.768	3.90189e-49	1.29238
Eno1	0.974	0.856	1.40416e-109	1.24714
Pkm	0.992	0.942	8.35338e-117	1.22371
H2afz	0.967	0.861	7.20452e-97	1.14995
Sdc1	0.842	0.27	1.1495e-113	1.13737
Lox	0.834	0.44	8.96293e-68	1.10723
Fkbp11	0.878	0.43	1.56559e-90	1.10565
Npm1	0.995	0.942	3.48649e-123	1.1023
Slc16a3	0.691	0.252	2.16197e-81	1.09571
Gapdh	0.997	0.971	2.05765e-107	1.05954
Tagln	0.594	0.262	2.61524e-34	1.05767
Ran	0.977	0.903	4.81697e-101	1.02737
2700094K13Rik	0.753	0.313	1.08331e-91	0.997174
Tpi1	0.944	0.715	5.33205e-84	0.994137
Pgam1	0.964	0.808	1.11417e-93	0.971625
Hnrnpa1	0.949	0.692	3.69575e-89	0.948731
Hspd1	0.952	0.691	7.89738e-84	0.948131
Stmn1	0.556	0.076	6.15643e-84	0.945142
Tnc	0.694	0.24	1.31697e-54	0.882506
Rps10	1	0.988	9.1923e-130	0.882495
Rpl12	0.997	0.987	5.64229e-120	0.879855
Ckap4	0.936	0.697	1.44331e-75	0.878066
Rps2	1	1	2.05401e-145	0.874031
Eef1b2	0.987	0.932	1.55702e-114	0.86993
Eef1g	0.997	0.983	1.25048e-111	0.860311
Wisp1	0.607	0.099	2.82269e-88	0.857384
Lrrc59	0.921	0.65	9.8766e-74	0.857003
Fscn1	0.872	0.48	3.83231e-69	0.856729
Rpsa	1	0.995	5.70615e-122	0.852996
Ldha	0.987	0.97	4.64701e-55	0.851379
Ncl	0.967	0.808	4.94999e-60	0.849356
Actn1	0.895	0.505	2.56651e-63	0.842225
Hmgn2	0.844	0.532	7.67048e-54	0.829803
Eif5a	0.992	0.984	2.39218e-84	0.829741
Rpl29	0.995	0.993	1.77486e-119	0.826714
Cxcl14	0.467	0.247	6.16691e-12	0.825754
Slc25a5	0.977	0.915	2.01759e-68	0.815338
Loxl3	0.798	0.419	3.01531e-64	0.814814
Gnb2l1	0.995	0.972	3.91185e-109	0.808574
Rpl41	1	1	1.63563e-154	0.803579
Esd	0.972	0.801	4.63955e-66	0.800797
Fam162a	0.931	0.652	5.3789e-70	0.797837
Cxcl12	0.686	0.429	3.84257e-43	0.795123
Nme1	0.967	0.862	1.49957e-70	0.795092
Aprt	0.901	0.469	1.58148e-78	0.794653
Manf	0.967	0.87	2.64891e-44	0.793806
Rps18	1	1	5.37523e-126	0.793408
Rbm3	0.959	0.877	1.64795e-67	0.792157
Pabpc1	0.99	0.916	5.9091e-91	0.791477
Hspe1	0.985	0.895	5.08404e-75	0.789354
Ssr2	0.98	0.876	5.49287e-73	0.786476
Rps12	1	0.992	3.2409e-99	0.786167
Rps27l	0.997	0.965	3.10182e-57	0.783071
Rps17	1	0.998	1.4161e-117	0.782277
Rpl32	1	0.999	3.40505e-131	0.750915
Rps26	0.995	0.991	1.41357e-103	0.750215
Serbp1	0.987	0.914	9.58021e-75	0.746163
Rpl5	1	0.975	3.54153e-105	0.743561
Vmp1	0.952	0.692	8.08966e-64	0.742671
Rps27a	1	0.999	1.15897e-125	0.740054
Rpl23	1	0.998	2.13701e-119	0.739212
Ccl9	0.388	0.063	1.50146e-47	0.733018
Rplp2	1	0.999	3.06124e-118	0.725328
Rps3	1	0.999	4.46727e-113	0.724834
Rpl27a	0.997	0.998	1.11693e-117	0.723194
Cnn2	0.849	0.562	1.35568e-40	0.714441
Txn1	0.992	0.949	2.37151e-64	0.71359
Actg1	0.997	0.996	2.54749e-34	0.711103
Gm10076	0.982	0.811	3.6976e-71	0.705012
Serpine1	0.862	0.635	6.89948e-19	0.700388
Steap1	0.561	0.025	1.76374e-130	0.699355
Rpl10a	0.997	0.997	3.09356e-90	0.69817
Rpl28	1	0.994	5.58401e-96	0.692507
Gsto1	0.77	0.234	2.02343e-93	0.690856
Bcat1	0.727	0.177	4.70242e-90	0.690443
Rpl19	1	0.999	6.9595e-110	0.689472
Creb3l1	0.768	0.309	1.20053e-61	0.687774
Cald1	0.987	0.949	6.67886e-57	0.685707
Rpl38	1	0.991	6.41789e-91	0.683923
Hmox1	0.64	0.252	1.12374e-54	0.68339
Rps20	0.997	0.997	1.72619e-86	0.682644
Marcksl1	0.615	0.178	2.91605e-57	0.682333
Rplp1	1	0.999	2.06102e-106	0.676212
Inhba	0.518	0.224	3.65917e-38	0.675685
Cycs	0.982	0.79	2.3825e-51	0.673901
Tomm20	0.959	0.772	1.42204e-52	0.672167
Rpl36al	0.995	0.951	2.10657e-73	0.667952
Fabp5	0.528	0.18	4.77247e-43	0.662643
Ccl7	0.681	0.366	9.19213e-23	0.661222
Tcp1	0.929	0.656	6.68305e-54	0.659767
Hsp90aa1	0.985	0.912	9.62347e-38	0.655692
Rpl18	1	0.996	2.31916e-90	0.654652
Rpl11	1	0.999	1.98617e-108	0.654286
Sec61b	0.99	0.954	3.44075e-58	0.652579
Rpl22	1	0.981	1.01423e-93	0.649533
Erh	0.98	0.913	6.68569e-63	0.649503
Rpl39	1	0.997	6.59327e-89	0.645663
Itga5	0.821	0.451	1.08987e-42	0.644337
Rps21	0.997	0.979	2.31558e-81	0.644294
Anp32b	0.98	0.812	1.27569e-50	0.641232
Ddx39	0.801	0.336	2.89482e-63	0.634634
Cct2	0.923	0.606	6.0942e-51	0.633811
Cstb	0.959	0.763	5.37525e-40	0.633063
Hnrnpc	0.959	0.689	1.20083e-49	0.631342
Srm	0.872	0.622	8.9443e-36	0.630845
Hspa9	0.911	0.586	2.83544e-47	0.62747
Cct3	0.923	0.645	4.00566e-42	0.622274
Rpl7	1	0.998	2.69819e-98	0.621067
Eif4ebp1	0.941	0.709	1.19521e-40	0.620127
Igfbp3	0.283	0.028	8.06942e-45	0.619655
Nap1l1	0.952	0.761	4.16126e-43	0.619035
Cdk4	0.911	0.716	1.88816e-48	0.618399
Rps15a	1	0.999	1.96212e-100	0.617861
Rpl6	1	1	5.53806e-98	0.616517
Asns	0.528	0.085	7.74204e-76	0.61396
Rps8	1	0.999	2.49472e-103	0.613684
Btf3	0.992	0.985	8.09044e-88	0.612946
Set	0.949	0.741	3.41863e-41	0.612126
Rpl27	0.997	0.958	5.13937e-79	0.612063
Ranbp1	0.98	0.886	1.64237e-37	0.604758
Kdelr2	0.957	0.781	1.02246e-29	0.603081
Rps7	1	1	1.367e-93	0.601293
Id3	0.957	0.873	2.32409e-13	0.599428
Rps13	1	0.997	2.54072e-79	0.59857
Prdx5	0.985	0.864	1.95288e-45	0.594822
Eif4a1	0.985	0.944	2.51946e-37	0.592104
Surf4	0.944	0.656	1.08076e-42	0.589904
Ppia	1	1	2.27843e-71	0.589702
Rps25	0.997	0.998	1.92133e-85	0.589497
Smg6	0.696	0.286	9.33763e-48	0.58942
Rps3a1	1	0.999	1.95756e-97	0.588004
Rps11	1	0.999	1.47313e-89	0.587238
Ube2s	0.944	0.78	1.29794e-37	0.587072
Pgk1	0.74	0.228	4.23157e-80	0.586395
Cfl1	0.995	0.979	8.26237e-63	0.585131
2810417H13Rik	0.355	0.024	8.75136e-65	0.584366
Nt5dc2	0.643	0.124	9.67591e-86	0.58364
Rpl17	1	0.999	6.87992e-79	0.582893
Ssr3	0.957	0.759	1.75935e-40	0.577931
Csrp2	0.929	0.792	1.78245e-17	0.575085
Ndufa4l2	0.727	0.618	4.02293e-18	0.57484
Cenpa	0.327	0.034	3.78078e-49	0.573236
Snrpf	0.954	0.758	3.19834e-39	0.572322
C1qbp	0.913	0.586	1.58363e-44	0.570289
Galk1	0.87	0.452	1.14821e-56	0.567534
Serp1	0.964	0.827	7.49819e-32	0.567142
Tspan4	0.916	0.616	4.45625e-33	0.565264
Cxcl1	0.648	0.476	3.1145e-06	0.563875
Rps15	1	0.999	4.13985e-82	0.563731
Rpl4	1	0.999	5.90689e-87	0.561878
Sec61g	0.997	0.982	2.27833e-55	0.560701
Rpl36	1	0.999	9.86072e-73	0.560279
Rps6	0.997	1	1.32158e-93	0.559421
Csrp1	0.895	0.616	3.71333e-33	0.557587
Tpm1	0.939	0.785	1.1473e-28	0.556303
Rpl14	1	0.999	1.76233e-76	0.556138
Nop58	0.765	0.397	1.68521e-44	0.55393
Rpl26	1	0.999	1.24953e-73	0.552732
Rpl13a	1	1	4.35524e-91	0.552113
Rpl15	0.997	0.995	1.34879e-74	0.552081
Hspa5	0.992	0.972	1.48846e-15	0.550906
Prelid1	0.954	0.759	3.40521e-37	0.549289
Rpl30	0.997	0.991	5.52195e-62	0.544726
Prmt1	0.918	0.66	2.8972e-35	0.543627
Dut	0.773	0.357	3.06009e-52	0.542636
Tnfaip6	0.666	0.387	1.17054e-28	0.539422
Rps12-ps3	0.967	0.815	8.03171e-40	0.535782
Hsp90ab1	0.997	0.997	1.05593e-37	0.535724
Tpm4	0.98	0.983	5.65229e-37	0.53518
Snrpd1	0.911	0.609	4.50011e-41	0.534472
Il33	0.505	0.285	1.62424e-19	0.533798
Tuba1c	0.671	0.247	1.07397e-53	0.532768
Lman1	0.949	0.795	4.53374e-30	0.530884
Mlec	0.875	0.547	7.48275e-39	0.528174
Gnl3	0.786	0.355	2.09959e-50	0.528105
Ccng1	0.663	0.284	6.83718e-57	0.527865
Ppa1	0.895	0.571	7.18329e-35	0.527004
Isg15	0.548	0.286	7.71499e-21	0.526981
Cct7	0.944	0.768	8.83968e-31	0.526408
Maged1	0.906	0.743	1.16969e-26	0.524535
Odc1	0.806	0.421	4.90208e-47	0.524258
Aldoa	0.99	0.97	1.88796e-21	0.522979
Nop56	0.819	0.445	4.21387e-43	0.521288
Ccnb2	0.337	0.026	6.77659e-56	0.521282
Atp5b	0.995	0.953	8.19407e-33	0.519705
Myl9	0.459	0.154	2.14266e-31	0.517563
Cct8	0.959	0.738	6.01827e-33	0.517031
Gars	0.844	0.515	2.12922e-35	0.515528
Foxp1	0.834	0.427	1.51545e-49	0.513402
Vdac1	0.941	0.641	1.26259e-39	0.51283
Rpl36a	0.995	0.996	2.15132e-68	0.512325
Rpl37	1	0.999	6.84356e-70	0.510645
Rps16	1	1	2.44827e-75	0.508664
Cdkn1a	0.459	0.315	6.697e-07	0.508538
Aebp1	0.941	0.804	2.4268e-20	0.508026
Cox5a	0.974	0.869	1.74732e-38	0.505178
Tomm40	0.842	0.453	1.82599e-46	0.504398
Phb2	0.957	0.741	7.77348e-36	0.50248
Eif2s1	0.89	0.58	5.82181e-35	0.50133
Rps24	1	0.998	4.12553e-60	0.500478
Plekha6	0.153	0.365	1.99484e-26	-0.500332
Adcy7	0.321	0.436	2.33724e-43	-0.501027
St3gal4	0.462	0.508	3.62644e-48	-0.501942
Rbp1	0.974	0.975	1.03794e-17	-0.502285
Btg2	0.773	0.659	2.84381e-20	-0.502591
Cys1	0.105	0.333	1.10083e-31	-0.503242
Sgce	0.694	0.7	6.95058e-45	-0.503317
Akap13	0.727	0.667	7.19073e-52	-0.503915
Maff	0.546	0.548	1.1385e-33	-0.504169
Uap1	0.875	0.804	4.47671e-22	-0.504226
Pkd2	0.541	0.579	1.29792e-47	-0.504256
Lamp2	0.883	0.851	4.01627e-42	-0.50485
Arap1	0.462	0.527	8.64198e-37	-0.504967
Medag	0.862	0.856	6.77787e-28	-0.507211
Tgfb3	0.503	0.552	1.43739e-38	-0.508134
Pkd1	0.316	0.421	4.25009e-46	-0.512094
Fstl1	1	0.999	1.81281e-32	-0.513831
Fam20c	0.342	0.446	2.06263e-45	-0.514144
S100a13	0.916	0.905	3.90092e-37	-0.51451
Abca8b	0.125	0.356	2.181e-26	-0.515719
Sntb2	0.709	0.693	2.85289e-52	-0.516278
Frzb	0.673	0.655	1.76828e-30	-0.518081
mt-Nd4	1	1	9.48364e-45	-0.520537
Sod3	0.87	0.896	1.34655e-19	-0.521139
Mfge8	0.849	0.819	9.10242e-40	-0.521546
Fosb	0.712	0.664	2.70036e-22	-0.525529
Tmsb4x	0.995	1	2.23608e-33	-0.530135
Ctsb	0.992	0.986	3.63876e-32	-0.532686
Heyl	0.393	0.502	4.31693e-25	-0.532946
Wisp2	0.513	0.382	4.84237e-12	-0.533406
mt-Co1	1	1	6.54826e-63	-0.533431
Col15a1	0.87	0.912	9.7215e-19	-0.538238
Tril	0.306	0.468	1.35467e-37	-0.544341
Aplp2	0.87	0.819	6.8435e-57	-0.548034
Pqlc3	0.393	0.486	6.76821e-49	-0.554625
Scara5	0.071	0.283	2.83022e-21	-0.556081
Map1lc3a	0.844	0.848	9.58647e-42	-0.558063
Pxdc1	0.513	0.539	2.38425e-55	-0.559286
Gxylt2	0.388	0.446	7.25945e-35	-0.563757
Lamp1	0.99	0.987	7.79546e-44	-0.565658
Rsrp1	0.964	0.963	4.34618e-37	-0.568524
Lamb2	0.426	0.529	5.05205e-46	-0.56953
Klf9	0.768	0.727	2.32925e-45	-0.569681
Gpm6b	0.895	0.918	2.80703e-27	-0.570743
Lrrn4cl	0.14	0.274	6.17856e-37	-0.571008
Tbx20	0.49	0.542	4.4448e-36	-0.57296
Sfrp1	0.612	0.652	1.53562e-14	-0.574776
Zfp36l1	0.778	0.77	2.63924e-35	-0.57512
Nfib	0.824	0.814	3.55903e-52	-0.576045
Podn	0.166	0.336	1.43262e-35	-0.580291
Bhlhe40	0.719	0.704	1.13161e-33	-0.581366
Gas6	0.439	0.61	2.94329e-17	-0.582093
Naalad2	0.436	0.538	7.12395e-53	-0.582955
Smtnl2	0.181	0.405	5.36025e-45	-0.590002
Il11ra1	0.849	0.827	1.07763e-45	-0.590399
C3	0.37	0.446	2.28662e-15	-0.591144
Rasl11b	0.278	0.429	5.43696e-32	-0.592901
Angptl2	0.753	0.718	9.14073e-38	-0.593501
Spon1	0.179	0.37	1.8396e-31	-0.593797
Lpl	0.747	0.706	6.0713e-33	-0.594858
Gstt1	0.339	0.508	9.41568e-36	-0.595548
Plpp3	0.77	0.786	2.63905e-20	-0.597731
Myl12b	0.862	0.849	1.97284e-57	-0.599733
Pink1	0.398	0.559	2.45407e-41	-0.600067
Mxra7	0.88	0.874	8.01593e-50	-0.600148
Lysmd2	0.587	0.617	1.03692e-63	-0.60617
Lbp	0.227	0.389	7.12775e-34	-0.608838
Arhgef40	0.663	0.684	3.62357e-66	-0.610468
Meg3	0.816	0.832	3.72704e-12	-0.612424
C1qtnf2	0.416	0.511	2.98588e-46	-0.612517
Atf3	0.301	0.277	8.55299e-15	-0.612716
Lhfp	0.987	0.988	6.65617e-42	-0.613332
Socs3	0.699	0.601	1.73506e-28	-0.6138
Atp1a2	0.151	0.4	3.59366e-29	-0.615919
Smim14	0.903	0.908	6.06949e-52	-0.620547
Ramp2	0.64	0.668	1.38816e-53	-0.629813
Nfia	0.732	0.757	1.43423e-39	-0.633328
Ccnd1	0.582	0.623	2.46645e-27	-0.639153
Col4a4	0.061	0.362	7.86309e-40	-0.647257
Lsp1	0.88	0.888	1.14699e-31	-0.647645
Cyb5a	0.985	0.981	3.11762e-59	-0.651519
Tmem204	0.242	0.463	1.89121e-41	-0.651565
Gm9780	0.449	0.575	7.04279e-46	-0.652985
Scml4	0.117	0.404	1.33175e-45	-0.658124
Smpdl3a	0.207	0.429	3.49766e-37	-0.660924
Slc29a1	0.704	0.73	1.055e-44	-0.665748
Nav1	0.63	0.673	6.63321e-62	-0.68369
Timp3	0.51	0.529	2.55197e-12	-0.68731
Rora	0.546	0.659	6.28537e-57	-0.692648
Nupr1	0.895	0.865	3.87196e-25	-0.695496
Zfp36	0.538	0.535	3.10209e-24	-0.698614
Dbp	0.316	0.402	1.25946e-25	-0.698999
Vcan	0.837	0.819	1.01404e-60	-0.699438
Rhob	0.786	0.827	2.55353e-37	-0.706502
Plpp1	0.842	0.851	1.83994e-51	-0.711299
Nfic	0.862	0.874	1.42034e-57	-0.715361
Pdlim2	0.857	0.898	1.8015e-50	-0.718054
Aes	0.916	0.929	9.15898e-60	-0.72455
Klf13	0.605	0.711	5.73325e-56	-0.726991
Lpar1	0.781	0.829	1.07232e-65	-0.728104
Tapbp	0.763	0.817	9.90307e-58	-0.72864
Egr1	0.885	0.845	2.33191e-30	-0.728923
Ms4a4d	0.735	0.77	1.20302e-50	-0.7311
Ecm2	0.263	0.504	2.79777e-44	-0.732493
Tmem100	0.122	0.271	8.14022e-19	-0.74023
Mxra8	0.898	0.916	5.80944e-59	-0.744191
Crip2	0.952	0.98	5.41803e-48	-0.752301
Abi3bp	0.263	0.524	3.03223e-39	-0.75314
Spry1	0.648	0.691	1.99131e-56	-0.7535
Adamts2	0.918	0.915	5.34224e-61	-0.753686
Itih5	0.255	0.463	4.79058e-36	-0.756938
B2m	0.997	0.998	1.99773e-75	-0.759478
Fhl1	0.681	0.758	4.59887e-49	-0.764929
Hspg2	0.827	0.827	8.54517e-65	-0.76759
Adamts5	0.668	0.77	3.30549e-30	-0.767693
Axl	0.939	0.955	3.94333e-54	-0.767952
Lrp1	0.908	0.893	1.44318e-67	-0.779015
Kcnk2	0.296	0.439	8.31796e-36	-0.779122
Fcgrt	0.745	0.846	2.26932e-63	-0.782748
Scn7a	0.344	0.575	1.53959e-54	-0.789061
Cd55	0.342	0.564	4.45647e-46	-0.789092
Itm2a	0.434	0.569	5.92337e-51	-0.789279
Cd302	0.883	0.864	1.93964e-80	-0.794227
Cmklr1	0.253	0.534	3.21119e-63	-0.804781
Ahnak	0.916	0.913	1.23877e-63	-0.805735
Cd81	0.992	0.999	1.34926e-99	-0.81193
Tprgl	0.781	0.858	4.23048e-75	-0.813152
Matn2	0.64	0.693	6.1374e-62	-0.814426
Mtch1	0.941	0.983	5.18155e-73	-0.814457
Hspa1a	0.408	0.468	9.55819e-16	-0.815356
Dpysl2	0.763	0.831	5.29835e-61	-0.817944
Ecm1	0.86	0.864	1.97126e-53	-0.821277
Ypel3	0.684	0.785	1.4148e-57	-0.826253
Qpct	0.357	0.602	2.91361e-51	-0.831823
Sdc2	0.954	0.972	3.81187e-70	-0.837859
Ogn	0.758	0.817	5.51035e-39	-0.840654
Sptbn1	0.923	0.959	3.4043e-65	-0.845893
C1qtnf7	0.352	0.557	1.86721e-54	-0.84716
F2r	0.75	0.819	5.1542e-61	-0.852346
Ugp2	0.88	0.881	1.77306e-53	-0.854556
Pdgfrl	0.406	0.566	9.69791e-52	-0.856946
Bgn	1	1	7.24244e-121	-0.858004
Aldh2	0.885	0.905	2.03411e-72	-0.859077
Pla1a	0.526	0.651	5.54685e-51	-0.865502
Plxdc2	0.694	0.793	1.01745e-71	-0.877086
Fbln5	0.446	0.622	1.31623e-35	-0.878389
Timp2	0.939	0.982	1.17709e-85	-0.879476
Nid1	0.855	0.874	6.33303e-73	-0.880825
Bmp4	0.184	0.516	1.52391e-45	-0.883614
Malat1	1	1	1.6922e-161	-0.885034
Serpinf1	0.916	0.967	2.49169e-47	-0.900406
S100a10	0.972	0.987	1.70771e-70	-0.920754
Rarres2	0.895	0.954	5.58418e-57	-0.928863
Jup	0.52	0.75	3.48289e-74	-0.945296
Aldh1a1	0.492	0.689	3.40827e-57	-0.946294
Meox1	0.735	0.868	4.79841e-34	-0.949882
Ddah2	0.791	0.878	2.34073e-84	-0.95211
Gsta3	0.179	0.493	8.30078e-36	-0.953352
Igf1	0.574	0.758	1.23528e-39	-0.953661
H2-D1	0.974	0.974	2.52265e-86	-0.958571
Postn	0.865	0.797	9.80873e-27	-0.972714
Ly6c1	0.321	0.482	9.41912e-34	-0.976993
Selenbp1	0.441	0.638	6.58166e-49	-0.979054
Psap	0.969	0.964	3.53353e-99	-0.984138
Ackr4	0.056	0.404	1.55456e-49	-0.994926
Emp1	0.929	0.982	3.92238e-105	-0.997588
Ier2	0.921	0.928	2.06322e-31	-0.997862
Col6a2	0.834	0.945	4.14568e-86	-0.998383
Fos	0.921	0.915	2.45481e-29	-1.00238
Slc43a3	0.73	0.842	5.84272e-69	-1.00401
Igfbp7	1	1	1.69358e-155	-1.01751
Pcolce	0.982	0.998	2.03927e-87	-1.02289
Col8a1	0.944	0.981	1.85763e-61	-1.02467
Tcf4	0.903	0.95	1.32304e-88	-1.02623
Junb	0.98	0.964	1.11691e-33	-1.03668
Camk2n1	0.436	0.704	1.34406e-66	-1.04498
Col6a1	0.86	0.974	4.34145e-101	-1.0458
G0s2	0.418	0.634	1.00579e-30	-1.04674
Lama2	0.469	0.729	1.60553e-104	-1.05853
Pcsk6	0.293	0.621	1.94343e-71	-1.06143
Dusp1	0.681	0.774	5.64904e-29	-1.07322
Jun	0.941	0.94	3.54404e-33	-1.07932
Lamc1	0.821	0.903	2.11756e-107	-1.08123
Ly6a	0.875	0.898	6.56086e-48	-1.08618
Itgbl1	0.291	0.593	2.38511e-55	-1.10684
Zbtb20	0.941	0.976	4.59238e-114	-1.10743
Fbln1	0.538	0.7	4.0321e-64	-1.12224
Jund	0.974	0.993	8.96468e-78	-1.12702
Cd9	0.916	0.959	1.15305e-80	-1.13431
Ifngr1	0.819	0.896	7.60312e-96	-1.13439
Rnase4	0.913	0.961	4.66962e-121	-1.13663
Hsd11b1	0.426	0.588	1.95931e-38	-1.14054
Cp	0.615	0.819	3.27405e-67	-1.15298
Adamtsl2	0.094	0.452	4.19652e-53	-1.15337
Itm2b	0.997	1	5.79687e-149	-1.15411
Mfap5	0.949	0.995	7.78386e-125	-1.16103
Cst6	0.143	0.399	4.78543e-31	-1.16502
Ccdc80	0.98	0.994	4.72704e-67	-1.16922
Serpine2	0.77	0.922	2.7539e-64	-1.17834
Fxyd1	0.773	0.926	1.63491e-122	-1.18499
Islr	0.365	0.652	2.61202e-71	-1.18571
Cpq	0.503	0.805	2.42854e-104	-1.25781
Crip1	0.977	0.999	1.40101e-95	-1.26464
Dpt	0.885	0.973	5.80183e-123	-1.27552
Tsc22d3	0.523	0.758	3.95739e-86	-1.2894
Cygb	0.908	0.983	3.05944e-101	-1.29543
Dpep1	0.74	0.826	1.57317e-77	-1.30032
Sepp1	0.798	0.932	4.69905e-109	-1.30465
Gpx3	0.954	0.977	8.87982e-87	-1.30732
Mmp2	0.763	0.894	6.75626e-92	-1.32306
Gas1	0.645	0.778	1.01055e-61	-1.3252
Fibin	0.696	0.88	8.02946e-67	-1.33212
Ckb	0.809	0.936	7.24968e-96	-1.33691
Igfbp4	0.816	0.948	7.47844e-109	-1.33994
Tnxb	0.232	0.719	6.06632e-100	-1.37872
Pam	0.814	0.932	2.8499e-115	-1.37991
Mgp	0.987	0.989	7.47159e-55	-1.38172
Tppp3	0.431	0.674	1.12131e-56	-1.40381
Nbl1	0.556	0.8	9.21533e-83	-1.42009
Ace	0.408	0.824	3.92982e-122	-1.43958
Klf2	0.737	0.86	7.47243e-52	-1.46047
Abca8a	0.39	0.832	4.53261e-114	-1.47597
Vwa1	0.342	0.781	8.56376e-113	-1.49396
Klf4	0.579	0.802	1.18575e-63	-1.50786
Pmp22	0.878	0.982	7.21135e-157	-1.51866
Gstm1	0.689	0.931	2.63774e-107	-1.56379
Aspn	0.719	0.9	7.43757e-80	-1.58414
Prelp	0.569	0.901	9.46119e-140	-1.58713
Entpd2	0.441	0.863	5.80444e-133	-1.58733
Eln	0.301	0.516	3.71824e-49	-1.60004
Mfap4	0.656	0.723	2.69008e-55	-1.65441
Cst3	0.997	1	2.43619e-112	-1.65664
Crispld2	0.571	0.856	6.05533e-119	-1.66326
Smoc2	0.837	0.948	3.28904e-108	-1.66853
Cfh	0.844	0.954	4.41354e-104	-1.67014
Fxyd6	0.543	0.835	1.26324e-113	-1.69536
Ifi27l2a	0.89	0.979	6.68416e-128	-1.75667
Ltbp4	0.699	0.968	8.58109e-188	-1.80512
Apod	0.173	0.526	2.32329e-63	-1.84096
Igfbp6	0.5	0.786	2.33286e-94	-1.84127
Serping1	0.901	0.99	5.43045e-176	-1.90952
Lum	0.974	0.999	1.37432e-193	-1.94323
Sparcl1	0.64	0.945	1.76858e-152	-1.96011
Cd34	0.852	0.991	4.49613e-236	-1.99655
Dcn	1	1	2.49929e-274	-2.01891
Cilp	0.357	0.608	1.38366e-50	-2.08742
Clec3b	0.202	0.726	4.14036e-97	-2.10328
Htra3	0.768	0.964	5.11589e-160	-2.17234
Gsn	0.987	0.999	2.62031667797072e-318	-3.16063
Pi16	0.592	0.957	2.05334e-214	-3.16522

## Sheet: F-Cyc vs F-CI
Gene	pct.1	pct.2	p_val_adj	Log2FoldChange
Cdc20	0.837	0.199	3.51969e-89	2.15492
Cks2	0.947	0.536	1.42493e-118	2.07344
Cenpa	0.889	0.327	5.15018e-80	2.01614
Stmn1	0.99	0.556	1.45628e-80	1.97747
Hmgb2	0.928	0.564	8.99501e-91	1.88246
Birc5	0.942	0.268	6.48065e-103	1.81782
Cdca8	0.928	0.163	7.67887e-103	1.6169
Hmmr	0.865	0.069	7.3791e-94	1.49607
Tpx2	0.889	0.135	5.97475e-106	1.48978
H2afz	1	0.967	5.40889e-109	1.46361
2810417H13Rik	0.913	0.355	1.36358e-54	1.44378
Ccna2	0.832	0.105	4.857e-93	1.4373
Ccnb1	0.788	0.11	7.32993e-79	1.43595
Ccnb2	0.889	0.337	1.55043e-54	1.41308
Ube2s	0.986	0.944	5.17431e-73	1.37385
Cdca3	0.899	0.286	6.54632e-73	1.28842
Ube2c	0.649	0.117	7.32553e-53	1.28528
Racgap1	0.875	0.128	5.13023e-85	1.27596
Knstrn	0.899	0.199	4.86827e-82	1.24147
Cks1b	0.966	0.742	6.89812e-63	1.19113
Cenpf	0.716	0.102	3.78655e-68	1.17286
Kif20a	0.817	0.143	7.77272e-73	1.16366
Smc2	0.841	0.321	4.8395e-53	1.16186
H2afx	0.865	0.569	8.61541e-80	1.15279
Cenpe	0.702	0.036	2.00656e-74	1.14656
Smc4	0.947	0.64	2.70159e-57	1.14588
Pbk	0.663	0.061	1.14364e-59	1.14548
Rrm2	0.755	0.224	2.63145e-39	1.09674
Cdkn3	0.808	0.209	1.72448e-63	1.09026
Tk1	0.774	0.209	3.29187e-52	1.08706
Hmgn2	1	0.844	4.02845e-38	1.07729
Cdk1	0.606	0.204	1.35272e-36	1.06806
Tacc3	0.841	0.224	9.62087e-60	1.06544
Tmpo	0.923	0.487	2.43614e-55	1.05589
Mki67	0.779	0.092	6.036e-72	1.05388
Fam64a	0.678	0.043	8.43682e-65	1.03941
Tubb4b	0.938	0.875	2.32149e-38	1.02571
Dek	0.938	0.742	5.46691e-42	1.02296
Spc24	0.885	0.429	3.47697e-58	1.02279
Nucks1	0.981	0.862	5.99834e-55	1.01061
Top2a	0.438	0.115	1.99684e-27	1.00387
Plk1	0.692	0.074	2.18913e-65	0.98699
2700094K13Rik	0.995	0.753	4.73777e-50	0.986767
Ckap2	0.74	0.122	3.27593e-67	0.979638
H2afv	0.976	0.872	1.40842e-34	0.97009
Lockd	0.803	0.255	1.89336e-46	0.955607
Kif23	0.654	0.041	3.22788e-62	0.95383
Anln	0.76	0.102	4.88331e-68	0.926497
Ckap2l	0.702	0.077	1.1434e-66	0.915948
Calm2	1	0.98	3.37668e-38	0.904638
Ccdc34	0.952	0.638	5.01425e-45	0.903791
Prc1	0.572	0.059	6.08193e-51	0.902798
Rad21	0.851	0.485	8.50235e-55	0.89513
Tubb6	0.976	0.929	1.39004e-27	0.891462
Rrm1	0.851	0.406	2.31725e-41	0.888706
Rangap1	0.865	0.423	1.1179e-45	0.872797
Lmnb1	0.827	0.449	2.83137e-46	0.864658
Tuba1b	0.99	0.972	1.73961e-24	0.86459
Kif22	0.659	0.069	2.16925e-64	0.861492
Kif2c	0.611	0.041	8.49854e-55	0.842387
Nuf2	0.697	0.133	7.03985e-47	0.802996
Hmgb1	1	0.987	2.99008e-44	0.775604
Arl6ip1	0.856	0.77	9.23206e-28	0.769217
Spc25	0.534	0.087	8.29474e-39	0.756661
Cenpm	0.846	0.372	9.39014e-42	0.756265
Tyms	0.856	0.61	9.63455e-26	0.755848
Diaph3	0.736	0.133	2.12849e-60	0.754104
Asf1b	0.673	0.133	2.37559e-46	0.74601
Mad2l1	0.798	0.265	1.09504e-52	0.735774
Mxd3	0.587	0.077	3.72102e-48	0.712437
Hn1	0.962	0.906	3.91527e-25	0.676458
Rnf26	0.856	0.622	1.28761e-33	0.67112
Reep4	0.635	0.263	1.02835e-37	0.668513
Hmgb3	0.793	0.429	1.64876e-27	0.658799
Lsm2	0.904	0.763	1.75477e-26	0.636254
Ywhah	1	0.946	8.58941e-24	0.633141
Depdc1a	0.529	0.015	1.43703e-52	0.629663
Aurka	0.476	0.051	1.34331e-34	0.627566
Anp32e	0.913	0.696	2.34765e-27	0.625122
Cenpq	0.654	0.128	7.33818e-36	0.621343
Ran	1	0.977	1.5872e-22	0.618077
Cenpw	0.736	0.296	5.09858e-27	0.612676
Ugp2	0.952	0.88	1.54945e-11	0.60761
Hp1bp3	0.889	0.719	1.10426e-20	0.607471
Fxyd6	0.702	0.543	1.15741e-08	0.606441
Kif20b	0.466	0.046	6.42322e-34	0.595889
Tubb5	0.995	0.964	1.88149e-08	0.59374
Psip1	0.909	0.778	2.32477e-23	0.585407
Ubald2	0.875	0.625	4.92137e-19	0.583726
Rfc5	0.726	0.327	3.10602e-27	0.583688
C330027C09Rik	0.611	0.102	6.07446e-43	0.580082
Lig1	0.582	0.278	4.25838e-17	0.579828
Pmf1	0.812	0.393	6.07659e-29	0.578825
Sae1	0.952	0.793	1.36753e-24	0.569287
Dlgap5	0.562	0.046	1.52802e-49	0.565065
Casc5	0.514	0.043	1.28941e-39	0.552932
Ect2	0.476	0.02	4.83479e-41	0.551344
1500009L16Rik	0.663	0.395	1.77956e-16	0.547951
Shcbp1	0.577	0.087	2.08013e-40	0.545814
Dbf4	0.596	0.145	1.47525e-32	0.545478
Dnajc9	0.812	0.439	2.53421e-17	0.543325
Dynll1	0.995	0.997	3.24693e-16	0.542796
Gpx7	0.976	0.906	4.06784e-07	0.540559
Lsm3	0.899	0.691	2.71921e-20	0.535522
Nek2	0.442	0.018	4.2829e-38	0.535221
Cdkn2d	0.529	0.306	1.46687e-20	0.533246
Pmp22	0.966	0.878	2.97653e-06	0.525732
Bub1b	0.572	0.059	1.6052e-46	0.521139
Slc43a3	0.885	0.73	8e-09	0.520715
Anp32b	0.981	0.98	1.13411e-15	0.516428
Cmc2	0.803	0.513	2.55597e-25	0.514196
Nup37	0.678	0.344	1.19748e-23	0.512779
Dut	0.841	0.773	2.44615e-10	0.510102
Lsm5	0.952	0.798	1.73671e-18	0.509637
Lmna	0.995	0.98	5.9552e-12	0.506368
Usp1	0.764	0.513	3.10505e-12	0.503173
Ccnd2	0.606	0.719	3.51794e-09	-0.576515
Fth1	0.995	1	3.1e-08	-0.577382
Aldoa	0.966	0.99	9.45193e-16	-0.708563
Malat1	0.99	1	1.02991e-11	-0.839236
Mt2	0.856	0.929	3.55551e-06	-0.901631
Mt1	0.928	0.969	1.00477e-06	-1.04689
Ndufa4l2	0.649	0.727	3.17787e-13	-1.06914
