# Supplementary material for: Single-cell expression profiling reveals dynamic flux of cardiac stromal, vascular and immune cells in health and injury
Source: eLife journal article supplement (doi:10.7554/elife.43882), 2019-03-26
Supplement: supp [file elife-43882-supp-v1.zip › elife_poa_e43882_Supplementary_File_8.xlsx]

## Sheet: F-Act vs F-SL + F-SH
Analysis Type:	PANTHER Overrepresentation Test (Released 20171205)
Annotation Version and Release Date:	GO Ontology database Released 2017-12-27
Analyzed List:	upload_1 (Mus musculus)
Reference List:	MIvsSham_expressed_genes.txt (Mus musculus)	There are duplicate IDs in the file. The unique set of IDs will be used.
Test Type:	FISHER
GO biological process complete	MIvsSham_expressed_genes.txt - REFLIST (13100)	upload_1 (101)	upload_1 (expected)	upload_1 (over/under)	upload_1 (fold Enrichment)	upload_1 (raw P-value)	upload_1 (FDR)
regulation of response to wounding (GO:1903034)	126	10	0.97	0	10.29	8.37e-08	0.000402
regulation of wound healing (GO:0061041)	100	9	0.77	0	11.67	1.42e-07	0.000409
supramolecular fiber organization (GO:0097435)	315	15	2.43	0	6.18	2.89e-08	0.000416
system development (GO:0048731)	2892	46	22.3	0	2.06	2.02e-07	0.000417
tissue development (GO:0009888)	1105	27	8.52	0	3.17	6.12e-08	0.000441
negative regulation of developmental process (GO:0051093)	713	21	5.5	0	3.82	1.26e-07	0.000455
animal organ development (GO:0048513)	2009	37	15.49	0	2.39	1.94e-07	0.000466
extracellular matrix organization (GO:0030198)	149	10	1.15	0	8.7	3.63e-07	0.000523
extracellular structure organization (GO:0043062)	149	10	1.15	0	8.7	3.63e-07	0.000581
anatomical structure development (GO:0048856)	3474	51	26.78	0	1.9	3.55e-07	0.000639
regulation of cell proliferation (GO:0042127)	1232	27	9.5	0	2.84	5.29e-07	0.000693
multicellular organismal process (GO:0032501)	4009	55	30.91	0	1.78	1.12e-06	0.00115
negative regulation of cellular process (GO:0048523)	3367	49	25.96	0	1.89	9.82e-07	0.00118
multicellular organism development (GO:0007275)	3287	48	25.34	0	1.89	1.39e-06	0.00118
developmental process (GO:0032502)	3734	52	28.79	0	1.81	1.33e-06	0.0012
regulation of multicellular organismal metabolic process (GO:0044246)	40	6	0.31	0	19.46	1.26e-06	0.00121
regulation of collagen metabolic process (GO:0010712)	39	6	0.3	0	19.95	1.1e-06	0.00122
regulation of multicellular organismal process (GO:0051239)	2088	36	16.1	0	2.24	1.64e-06	0.00131
positive regulation of collagen metabolic process (GO:0010714)	24	5	0.19	0	27.02	2.44e-06	0.00153
positive regulation of multicellular organismal metabolic process (GO:0044253)	24	5	0.19	0	27.02	2.44e-06	0.0016
positive regulation of collagen biosynthetic process (GO:0032967)	24	5	0.19	0	27.02	2.44e-06	0.00167
negative regulation of multicellular organismal process (GO:0051241)	853	21	6.58	0	3.19	2.21e-06	0.00168
regulation of developmental process (GO:0050793)	1855	33	14.3	0	2.31	2.34e-06	0.00168
regulation of cellular component movement (GO:0051270)	727	19	5.61	0	3.39	3.15e-06	0.00189
negative regulation of biological process (GO:0048519)	3689	51	28.44	0	1.79	3.43e-06	0.00198
regulation of cell-substrate adhesion (GO:0010810)	160	9	1.23	0	7.3	5.69e-06	0.00315
regulation of locomotion (GO:0040012)	722	18	5.57	0	3.23	1.12e-05	0.00557
regulation of blood coagulation (GO:0030193)	60	6	0.46	0	12.97	1.08e-05	0.00557
regulation of hemostasis (GO:1900046)	60	6	0.46	0	12.97	1.08e-05	0.00578
regulation of collagen biosynthetic process (GO:0032965)	35	5	0.27	0	18.53	1.26e-05	0.00607
collagen fibril organization (GO:0030199)	36	5	0.28	0	18.01	1.43e-05	0.00644
regulation of coagulation (GO:0050818)	63	6	0.49	0	12.35	1.4e-05	0.00652
regulation of cell motility (GO:2000145)	672	17	5.18	0	3.28	1.69e-05	0.00718
regulation of multicellular organismal development (GO:2000026)	1441	27	11.11	0	2.43	1.65e-05	0.00721
positive regulation of multicellular organismal process (GO:0051240)	1230	24	9.48	0	2.53	1.87e-05	0.0075
cell adhesion (GO:0007155)	537	15	4.14	0	3.62	1.85e-05	0.0076
biological adhesion (GO:0022610)	545	15	4.2	0	3.57	2.19e-05	0.00851
positive regulation of cell proliferation (GO:0008284)	691	17	5.33	0	3.19	2.4e-05	0.00911
negative regulation of cell-substrate adhesion (GO:0010812)	43	5	0.33	0	15.08	3.13e-05	0.0116
regulation of cell migration (GO:0030334)	644	16	4.97	0	3.22	3.83e-05	0.0138
positive regulation of response to wounding (GO:1903036)	50	5	0.39	0	12.97	6.1e-05	0.0214
macromolecule metabolic process (GO:0043170)	4885	19	37.66	0	0.5	7.39e-05	0.0253
negative regulation of cell-matrix adhesion (GO:0001953)	27	4	0.21	0	19.22	8.67e-05	0.029
positive regulation of cellular component movement (GO:0051272)	423	12	3.26	0	3.68	0.000118	0.0387
cellular macromolecule metabolic process (GO:0044260)	4536	17	34.97	0	0.49	0.000128	0.0409
positive regulation of developmental process (GO:0051094)	1046	20	8.06	0	2.48	0.000141	0.0442
regulation of systemic arterial blood pressure (GO:0003073)	62	5	0.48	0	10.46	0.000157	0.0473
positive regulation of locomotion (GO:0040017)	436	12	3.36	0	3.57	0.000156	0.0477

## Sheet: F-CI vs F-Act
Analysis Type:	PANTHER Overrepresentation Test (Released 20171205)
Annotation Version and Release Date:	GO Ontology database Released 2017-12-27
Analyzed List:	upload_1 (Mus musculus)
Reference List:	MIvsSham_expressed_genes.txt (Mus musculus)	There are duplicate IDs in the file. The unique set of IDs will be used.
Test Type:	FISHER
GO biological process complete	MIvsSham_expressed_genes.txt - REFLIST (13100)	upload_1 (213)	upload_1 (expected)	upload_1 (over/under)	upload_1 (fold Enrichment)	upload_1 (raw P-value)	upload_1 (FDR)
translation (GO:0006412)	292	54	4.75	0	11.37	1.59e-38	2.3e-34
peptide biosynthetic process (GO:0043043)	304	54	4.94	0	10.92	1.01e-37	7.31e-34
amide biosynthetic process (GO:0043604)	352	56	5.72	0	9.78	6.91e-37	3.32e-33
peptide metabolic process (GO:0006518)	400	56	6.5	0	8.61	3.04e-34	1.1e-30
cellular amide metabolic process (GO:0043603)	500	58	8.13	0	7.13	1.64e-31	4.71e-28
organonitrogen compound biosynthetic process (GO:1901566)	889	68	14.45	0	4.7	4.38e-27	1.05e-23
cytoplasmic translation (GO:0002181)	43	18	0.7	0	25.75	1.64e-18	3.37e-15
ribosome biogenesis (GO:0042254)	246	31	4	0	7.75	8.95e-18	1.61e-14
ribonucleoprotein complex biogenesis (GO:0022613)	362	35	5.89	0	5.95	1.16e-16	1.86e-13
cellular nitrogen compound biosynthetic process (GO:0044271)	2115	77	34.39	0	2.24	2.21e-12	3.18e-09
ribosomal small subunit biogenesis (GO:0042274)	69	15	1.12	0	13.37	3.94e-12	5.16e-09
ribosome assembly (GO:0042255)	59	14	0.96	0	14.59	7.56e-12	9.08e-09
rRNA processing (GO:0006364)	167	19	2.72	0	7	1.35e-10	1.5e-07
biosynthetic process (GO:0009058)	2906	89	47.25	0	1.88	2.46e-10	2.54e-07
organic substance biosynthetic process (GO:1901576)	2850	88	46.34	0	1.9	3.03e-10	2.91e-07
cellular biosynthetic process (GO:0044249)	2782	86	45.23	0	1.9	3.91e-10	3.52e-07
cellular nitrogen compound metabolic process (GO:0034641)	3449	99	56.08	0	1.77	5.41e-10	4.59e-07
rRNA metabolic process (GO:0016072)	186	19	3.02	0	6.28	7.21e-10	5.77e-07
organonitrogen compound metabolic process (GO:1901564)	3364	96	54.7	0	1.76	1.85e-09	1.4e-06
cellular process (GO:0009987)	9525	191	154.87	0	1.23	2e-09	1.44e-06
ribonucleoprotein complex assembly (GO:0022618)	179	18	2.91	0	6.18	2.59e-09	1.78e-06
ribonucleoprotein complex subunit organization (GO:0071826)	187	18	3.04	0	5.92	4.9e-09	3.21e-06
ribosomal small subunit assembly (GO:0000028)	19	8	0.31	0	25.9	6.44e-09	4.03e-06
cellular component biogenesis (GO:0044085)	1833	62	29.8	0	2.08	1.48e-08	8.91e-06
gene expression (GO:0010467)	2498	76	40.62	0	1.87	1.98e-08	1.14e-05
cellular macromolecule biosynthetic process (GO:0034645)	2229	69	36.24	0	1.9	6.61e-08	3.66e-05
regulation of cell death (GO:0010941)	1332	49	21.66	0	2.26	7.78e-08	4.15e-05
macromolecule biosynthetic process (GO:0009059)	2259	69	36.73	0	1.88	1.32e-07	6.79e-05
regulation of apoptotic process (GO:0042981)	1201	45	19.53	0	2.3	1.54e-07	7.64e-05
protein stabilization (GO:0050821)	141	14	2.29	0	6.11	1.87e-07	8.97e-05
cellular protein metabolic process (GO:0044267)	2343	70	38.1	0	1.84	2.04e-07	9.18e-05
regulation of programmed cell death (GO:0043067)	1215	45	19.76	0	2.28	2.03e-07	9.43e-05
ADP metabolic process (GO:0046031)	33	8	0.54	0	14.91	2.29e-07	9.98e-05
ribosomal large subunit biogenesis (GO:0042273)	67	10	1.09	0	9.18	3.84e-07	0.000163
posttranscriptional regulation of gene expression (GO:0010608)	345	21	5.61	0	3.74	4.24e-07	0.000175
purine nucleoside diphosphate metabolic process (GO:0009135)	38	8	0.62	0	12.95	5.83e-07	0.000215
regulation of cellular amide metabolic process (GO:0034248)	322	20	5.24	0	3.82	6.01e-07	0.000217
purine ribonucleoside diphosphate metabolic process (GO:0009179)	38	8	0.62	0	12.95	5.83e-07	0.000221
nucleoside diphosphate phosphorylation (GO:0006165)	38	8	0.62	0	12.95	5.83e-07	0.000227
nucleoside diphosphate metabolic process (GO:0009132)	54	9	0.88	0	10.25	6.5e-07	0.000228
glycolytic process (GO:0006096)	26	7	0.42	0	16.56	7.3e-07	0.000229
regulation of translation (GO:0006417)	291	19	4.73	0	4.02	5.73e-07	0.00023
ATP generation from ADP (GO:0006757)	26	7	0.42	0	16.56	7.3e-07	0.000234
regulation of protein localization to Cajal body (GO:1904869)	7	5	0.11	0	43.93	7.23e-07	0.000237
ncRNA processing (GO:0034470)	295	19	4.8	0	3.96	6.96e-07	0.000239
positive regulation of protein localization to Cajal body (GO:1904871)	7	5	0.11	0	43.93	7.23e-07	0.000242
nucleotide phosphorylation (GO:0046939)	40	8	0.65	0	12.3	8.2e-07	0.000251
ribonucleoside diphosphate metabolic process (GO:0009185)	42	8	0.68	0	11.71	1.13e-06	0.000341
sperm-egg recognition (GO:0035036)	18	6	0.29	0	20.5	1.65e-06	0.000477
binding of sperm to zona pellucida (GO:0007339)	18	6	0.29	0	20.5	1.65e-06	0.000487
RNA localization (GO:0006403)	149	13	2.42	0	5.37	1.99e-06	0.000563
pyruvate metabolic process (GO:0006090)	46	8	0.75	0	10.7	2.08e-06	0.000577
protein metabolic process (GO:0019538)	2705	74	43.98	0	1.68	2.3e-06	0.000613
positive regulation of translation (GO:0045727)	104	11	1.69	0	6.51	2.26e-06	0.000613
de novo' protein folding (GO:0006458)	34	7	0.55	0	12.66	3.44e-06	0.000903
positive regulation of protein localization to chromosome telomeric region (GO:1904816)	11	5	0.18	0	27.96	3.78e-06	0.000974
cellular macromolecular complex assembly (GO:0034622)	581	26	9.45	0	2.75	4.52e-06	0.00114
monosaccharide metabolic process (GO:0005996)	115	11	1.87	0	5.88	5.52e-06	0.00135
protein folding (GO:0006457)	139	12	2.26	0	5.31	5.5e-06	0.00137
ncRNA metabolic process (GO:0034660)	378	20	6.15	0	3.25	6.15e-06	0.00145
chaperone-mediated protein folding (GO:0061077)	54	8	0.88	0	9.11	6.06e-06	0.00146
carbohydrate catabolic process (GO:0016052)	55	8	0.89	0	8.95	6.85e-06	0.00159
regulation of protein localization to chromosome telomeric region (GO:1904814)	13	5	0.21	0	23.65	7.23e-06	0.00165
positive regulation of cellular process (GO:0048522)	3748	92	60.94	0	1.51	8.18e-06	0.00179
regulation of DNA biosynthetic process (GO:2000278)	97	10	1.58	0	6.34	8.1e-06	0.0018
positive regulation of cellular amide metabolic process (GO:0034250)	120	11	1.95	0	5.64	8.04e-06	0.00181
nucleoside monophosphate metabolic process (GO:0009123)	172	13	2.8	0	4.65	8.63e-06	0.00186
positive regulation of telomerase RNA localization to Cajal body (GO:1904874)	14	5	0.23	0	21.97	9.69e-06	0.00205
hexose metabolic process (GO:0019318)	100	10	1.63	0	6.15	1.04e-05	0.00213
negative regulation of cell death (GO:0060548)	803	31	13.06	0	2.37	1.03e-05	0.00216
nicotinamide nucleotide metabolic process (GO:0046496)	80	9	1.3	0	6.92	1.22e-05	0.00244
cell-cell recognition (GO:0009988)	27	6	0.44	0	13.67	1.21e-05	0.00245
pyridine nucleotide metabolic process (GO:0019362)	81	9	1.32	0	6.83	1.33e-05	0.00264
regulation of biological quality (GO:0065008)	2480	67	40.32	0	1.66	1.41e-05	0.00275
response to stress (GO:0006950)	2142	60	34.83	0	1.72	1.6e-05	0.00308
regulation of ubiquitin protein ligase activity (GO:1904666)	16	5	0.26	0	19.22	1.65e-05	0.00313
nucleoside triphosphate metabolic process (GO:0009141)	184	13	2.99	0	4.35	1.7e-05	0.00313
positive regulation of DNA biosynthetic process (GO:2000573)	63	8	1.02	0	7.81	1.69e-05	0.00316
pyridine-containing compound metabolic process (GO:0072524)	84	9	1.37	0	6.59	1.74e-05	0.00318
cellular component organization or biogenesis (GO:0071840)	3878	93	63.05	0	1.47	2.04e-05	0.00367
regulation of telomerase RNA localization to Cajal body (GO:1904872)	17	5	0.28	0	18.09	2.11e-05	0.00375
negative regulation of apoptotic process (GO:0043066)	705	28	11.46	0	2.44	2.15e-05	0.00378
purine nucleoside monophosphate metabolic process (GO:0009126)	163	12	2.65	0	4.53	2.46e-05	0.00422
purine ribonucleoside monophosphate metabolic process (GO:0009167)	163	12	2.65	0	4.53	2.46e-05	0.00427
purine ribonucleoside triphosphate metabolic process (GO:0009205)	164	12	2.67	0	4.5	2.6e-05	0.00441
negative regulation of programmed cell death (GO:0043069)	718	28	11.67	0	2.4	2.66e-05	0.00445
negative regulation of ubiquitin protein ligase activity (GO:1904667)	8	4	0.13	0	30.75	2.85e-05	0.00462
RNA processing (GO:0006396)	674	27	10.96	0	2.46	2.92e-05	0.00462
ribonucleoside monophosphate metabolic process (GO:0009161)	166	12	2.7	0	4.45	2.91e-05	0.00466
positive regulation of establishment of protein localization to telomere (GO:1904851)	8	4	0.13	0	30.75	2.85e-05	0.00467
cellular response to cytokine stimulus (GO:0071345)	458	21	7.45	0	2.82	2.83e-05	0.00468
ATP metabolic process (GO:0046034)	140	11	2.28	0	4.83	3.08e-05	0.00477
macromolecular complex subunit organization (GO:0043933)	1178	39	19.15	0	2.04	3.21e-05	0.00482
ribonucleoside triphosphate metabolic process (GO:0009199)	167	12	2.72	0	4.42	3.08e-05	0.00482
response to cytokine (GO:0034097)	536	23	8.72	0	2.64	3.15e-05	0.00483
regulation of protein stability (GO:0031647)	226	14	3.67	0	3.81	3.2e-05	0.00486
glucose metabolic process (GO:0006006)	70	8	1.14	0	7.03	3.38e-05	0.00502
cellular metabolic process (GO:0044237)	5827	125	94.74	0	1.32	3.87e-05	0.0057
positive regulation of biological process (GO:0048518)	4114	96	66.89	0	1.44	3.92e-05	0.0057
regulation of establishment of protein localization to telomere (GO:0070203)	9	4	0.15	0	27.33	4.07e-05	0.0058
purine nucleoside triphosphate metabolic process (GO:0009144)	172	12	2.8	0	4.29	4.03e-05	0.00581
oxidoreduction coenzyme metabolic process (GO:0006733)	95	9	1.54	0	5.83	4.28e-05	0.00605
positive regulation of programmed cell death (GO:0043068)	510	22	8.29	0	2.65	4.38e-05	0.00608
nitrogen compound metabolic process (GO:0006807)	5406	118	87.9	0	1.34	4.35e-05	0.00609
positive regulation of cell death (GO:0010942)	553	23	8.99	0	2.56	5.01e-05	0.00688
regulation of establishment of protein localization to chromosome (GO:0070202)	10	4	0.16	0	24.6	5.62e-05	0.00765
regulation of telomere maintenance (GO:0032204)	76	8	1.24	0	6.47	5.78e-05	0.00779
macromolecular complex assembly (GO:0065003)	1040	35	16.91	0	2.07	5.89e-05	0.00787
toxin transport (GO:1901998)	38	6	0.62	0	9.71	6.64e-05	0.00878
nucleic acid transport (GO:0050657)	129	10	2.1	0	4.77	7.87e-05	0.0102
RNA transport (GO:0050658)	129	10	2.1	0	4.77	7.87e-05	0.0103
ribonucleoprotein complex export from nucleus (GO:0071426)	59	7	0.96	0	7.3	8.51e-05	0.0109
monosaccharide biosynthetic process (GO:0046364)	24	5	0.39	0	12.81	8.69e-05	0.0111
establishment of RNA localization (GO:0051236)	131	10	2.13	0	4.69	8.88e-05	0.0112
ribonucleoprotein complex localization (GO:0071166)	60	7	0.98	0	7.18	9.37e-05	0.0116
regulation of signal transduction by p53 class mediator (GO:1901796)	60	7	0.98	0	7.18	9.37e-05	0.0117
cofactor metabolic process (GO:0051186)	319	16	5.19	0	3.08	9.81e-05	0.0121
osteoblast differentiation (GO:0001649)	107	9	1.74	0	5.17	0.000101	0.0123
detoxification (GO:0098754)	25	5	0.41	0	12.3	0.000103	0.0125
positive regulation of apoptotic process (GO:0043065)	505	21	8.21	0	2.56	0.000108	0.013
positive regulation of cell cycle (GO:0045787)	291	15	4.73	0	3.17	0.000122	0.0144
translational elongation (GO:0006414)	26	5	0.42	0	11.83	0.000121	0.0144
nuclear transport (GO:0051169)	65	7	1.06	0	6.62	0.000148	0.0174
positive regulation of telomere maintenance via telomerase (GO:0032212)	28	5	0.46	0	10.98	0.000165	0.0192
positive regulation of molecular function (GO:0044093)	1105	35	17.97	0	1.95	0.000169	0.0195
positive regulation of telomere maintenance (GO:0032206)	46	6	0.75	0	8.02	0.000172	0.0196
regulation of telomere maintenance via telomerase (GO:0032210)	46	6	0.75	0	8.02	0.000172	0.0197
cellular response to chemical stimulus (GO:0070887)	1567	45	25.48	0	1.77	0.000176	0.0199
purine ribonucleotide metabolic process (GO:0009150)	235	13	3.82	0	3.4	0.00018	0.0201
G1/S transition of mitotic cell cycle (GO:0000082)	68	7	1.11	0	6.33	0.000192	0.0211
ribosomal large subunit assembly (GO:0000027)	29	5	0.47	0	10.6	0.000191	0.0211
rRNA-containing ribonucleoprotein complex export from nucleus (GO:0071428)	15	4	0.24	0	16.4	0.000204	0.0223
cell cycle G1/S phase transition (GO:0044843)	69	7	1.12	0	6.24	0.000209	0.0226
nucleotide metabolic process (GO:0009117)	343	16	5.58	0	2.87	0.000217	0.0234
regulation of protein modification by small protein conjugation or removal (GO:1903320)	210	12	3.41	0	3.51	0.000241	0.0251
ribonucleotide metabolic process (GO:0009259)	242	13	3.93	0	3.3	0.000237	0.0253
cellular component assembly (GO:0022607)	1640	46	26.67	0	1.73	0.000241	0.0253
purine-containing compound metabolic process (GO:0072521)	276	14	4.49	0	3.12	0.00024	0.0255
negative regulation of ubiquitin-protein transferase activity (GO:0051444)	16	4	0.26	0	15.38	0.000252	0.0258
negative regulation of protein ubiquitination involved in ubiquitin-dependent protein catabolic process (GO:2000059)	16	4	0.26	0	15.38	0.000252	0.026
positive regulation of telomere maintenance via telomere lengthening (GO:1904358)	31	5	0.5	0	9.92	0.000252	0.0261
nucleobase-containing compound transport (GO:0015931)	151	10	2.46	0	4.07	0.000264	0.0268
negative regulation of cellular process (GO:0048523)	3367	79	54.75	0	1.44	0.000271	0.0272
nucleoside phosphate metabolic process (GO:0006753)	350	16	5.69	0	2.81	0.00027	0.0272
regulation of cell cycle arrest (GO:0071156)	51	6	0.83	0	7.24	0.000287	0.0286
positive regulation of cell proliferation (GO:0008284)	691	25	11.24	0	2.23	0.000292	0.0288
purine nucleotide metabolic process (GO:0006163)	248	13	4.03	0	3.22	0.000297	0.0291
regulation of protein ubiquitination (GO:0031396)	184	11	2.99	0	3.68	0.000303	0.0293
nucleocytoplasmic transport (GO:0006913)	184	11	2.99	0	3.68	0.000303	0.0295
gluconeogenesis (GO:0006094)	17	4	0.28	0	14.47	0.000308	0.0296
ribosomal small subunit export from nucleus (GO:0000056)	6	3	0.1	0	30.75	0.000316	0.0302
positive regulation of cellular protein metabolic process (GO:0032270)	1139	35	18.52	0	1.89	0.000333	0.0316
regulation of cellular protein metabolic process (GO:0032268)	1861	50	30.26	0	1.65	0.000346	0.0326
ribose phosphate metabolic process (GO:0019693)	253	13	4.11	0	3.16	0.000356	0.0333
regulation of protein metabolic process (GO:0051246)	2007	53	32.63	0	1.62	0.000362	0.0335
positive regulation of homeostatic process (GO:0032846)	188	11	3.06	0	3.6	0.000361	0.0335
antimicrobial humoral immune response mediated by antimicrobial peptide (GO:0061844)	18	4	0.29	0	13.67	0.000372	0.0337
negative regulation of cell cycle arrest (GO:0071157)	18	4	0.29	0	13.67	0.000372	0.0339
chemokine-mediated signaling pathway (GO:0070098)	34	5	0.55	0	9.04	0.00037	0.034
primary metabolic process (GO:0044238)	5772	120	93.85	0	1.28	0.000378	0.034
regulation of telomere maintenance via telomere lengthening (GO:1904356)	54	6	0.88	0	6.83	0.000381	0.0341
macromolecule modification (GO:0043412)	2076	16	33.75	0	0.47	0.000418	0.0369
maturation of SSU-rRNA from tricistronic rRNA transcript (SSU-rRNA 5.8S rRNA LSU-rRNA) (GO:0000462)	35	5	0.57	0	8.79	0.000417	0.0371
positive regulation of intrinsic apoptotic signaling pathway by p53 class mediator (GO:1902255)	7	3	0.11	0	26.36	0.000446	0.0392
nucleobase-containing small molecule metabolic process (GO:0055086)	405	17	6.59	0	2.58	0.00045	0.0393
response to unfolded protein (GO:0006986)	80	7	1.3	0	5.38	0.000481	0.0418
positive regulation of multi-organism process (GO:0043902)	134	9	2.18	0	4.13	0.000486	0.0419
drug metabolic process (GO:0017144)	334	15	5.43	0	2.76	0.0005	0.0429
hexose biosynthetic process (GO:0019319)	20	4	0.33	0	12.3	0.000526	0.0449

## Sheet: F-Cyc vs F-CI
Analysis Type:	PANTHER Overrepresentation Test (Released 20171205)
Annotation Version and Release Date:	GO Ontology database Released 2017-12-27
Analyzed List:	upload_1 (Mus musculus)
Reference List:	MIvsSham_expressed_genes.txt (Mus musculus)	There are duplicate IDs in the file. The unique set of IDs will be used.
Test Type:	FISHER
GO biological process complete	MIvsSham_expressed_genes.txt - REFLIST (13100)	upload_1 (114)	upload_1 (expected)	upload_1 (over/under)	upload_1 (fold Enrichment)	upload_1 (raw P-value)	upload_1 (FDR)
cell division (GO:0051301)	429	47	3.73	0	12.59	4.57e-38	6.59e-34
cell cycle (GO:0007049)	954	60	8.3	0	7.23	5.87e-37	4.23e-33
mitotic cell cycle (GO:0000278)	424	42	3.69	0	11.38	4.57e-32	2.19e-28
cell cycle process (GO:0022402)	613	46	5.33	0	8.62	2.13e-30	7.66e-27
mitotic cell cycle process (GO:1903047)	375	38	3.26	0	11.64	3.54e-29	1.02e-25
chromosome segregation (GO:0007059)	213	26	1.85	0	14.03	1.05e-21	2.52e-18
nuclear chromosome segregation (GO:0098813)	158	21	1.37	0	15.27	2.59e-18	5.33e-15
mitotic nuclear division (GO:0140014)	125	19	1.09	0	17.47	1.28e-17	2.31e-14
nuclear division (GO:0000280)	217	22	1.89	0	11.65	7.27e-17	1.16e-13
sister chromatid segregation (GO:0000819)	106	17	0.92	0	18.43	3.32e-16	4.79e-13
organelle fission (GO:0048285)	244	22	2.12	0	10.36	7.08e-16	9.28e-13
microtubule-based process (GO:0007017)	473	27	4.12	0	6.56	1.04e-14	1.25e-11
regulation of cell cycle process (GO:0010564)	462	26	4.02	0	6.47	4.87e-14	5.39e-11
regulation of chromosome segregation (GO:0051983)	85	14	0.74	0	18.93	1.15e-13	1.19e-10
mitotic sister chromatid segregation (GO:0000070)	89	14	0.77	0	18.08	2.03e-13	1.95e-10
chromosome organization (GO:0051276)	749	31	6.52	0	4.76	3.23e-13	2.91e-10
regulation of cell cycle (GO:0051726)	812	32	7.07	0	4.53	4.38e-13	3.72e-10
microtubule cytoskeleton organization involved in mitosis (GO:1902850)	85	13	0.74	0	17.57	2.12e-12	1.7e-09
microtubule cytoskeleton organization (GO:0000226)	332	21	2.89	0	7.27	2.27e-12	1.72e-09
spindle organization (GO:0007051)	113	14	0.98	0	14.24	3.85e-12	2.77e-09
organelle organization (GO:0006996)	2375	53	20.67	0	2.56	5.1e-12	3.5e-09
regulation of mitotic cell cycle (GO:0007346)	437	23	3.8	0	6.05	6.48e-12	4.24e-09
mitotic spindle organization (GO:0007052)	65	11	0.57	0	19.45	4.32e-11	2.71e-08
mitotic cell cycle phase transition (GO:0044772)	112	13	0.97	0	13.34	4.99e-11	2.99e-08
regulation of nuclear division (GO:0051783)	148	14	1.29	0	10.87	1.07e-10	6.15e-08
cell cycle phase transition (GO:0044770)	121	13	1.05	0	12.35	1.21e-10	6.69e-08
positive regulation of cell cycle (GO:0045787)	291	18	2.53	0	7.11	1.41e-10	7.52e-08
cytokinesis (GO:0000910)	76	11	0.66	0	16.63	1.95e-10	1e-07
regulation of mitotic nuclear division (GO:0007088)	127	13	1.11	0	11.76	2.1e-10	1.04e-07
mitotic cytokinesis (GO:0000281)	44	9	0.38	0	23.5	6.2e-10	2.98e-07
cellular component organization (GO:0016043)	3711	63	32.29	0	1.95	2.11e-09	9.81e-07
cytoskeleton-dependent cytokinesis (GO:0061640)	52	9	0.45	0	19.89	2.29e-09	1.03e-06
DNA packaging (GO:0006323)	108	11	0.94	0	11.7	5.84e-09	2.55e-06
regulation of attachment of spindle microtubules to kinetochore (GO:0051988)	12	6	0.1	0	57.46	6.16e-09	2.61e-06
regulation of mitotic sister chromatid separation (GO:0010965)	46	8	0.4	0	19.98	1.79e-08	7.37e-06
cellular component organization or biogenesis (GO:0071840)	3878	63	33.75	0	1.87	2.15e-08	8.62e-06
positive regulation of cell cycle process (GO:0090068)	192	13	1.67	0	7.78	2.26e-08	8.8e-06
regulation of chromosome separation (GO:1905818)	49	8	0.43	0	18.76	2.78e-08	1.06e-05
regulation of cell cycle phase transition (GO:1901987)	236	14	2.05	0	6.82	3.04e-08	1.12e-05
cytoskeleton organization (GO:0007010)	747	24	6.5	0	3.69	3.13e-08	1.13e-05
regulation of mitotic cell cycle phase transition (GO:1901990)	213	13	1.85	0	7.01	7.16e-08	2.4e-05
regulation of mitotic sister chromatid segregation (GO:0033047)	56	8	0.49	0	16.42	7.09e-08	2.43e-05
DNA conformation change (GO:0071103)	140	11	1.22	0	9.03	7.06e-08	2.48e-05
establishment of chromosome localization (GO:0051303)	60	8	0.52	0	15.32	1.15e-07	3.77e-05
chromosome localization (GO:0050000)	61	8	0.53	0	15.07	1.29e-07	4.14e-05
spindle assembly (GO:0051225)	62	8	0.54	0	14.83	1.45e-07	4.54e-05
regulation of mitotic metaphase/anaphase transition (GO:0030071)	42	7	0.37	0	19.15	1.88e-07	5.65e-05
regulation of metaphase/anaphase transition of cell cycle (GO:1902099)	42	7	0.37	0	19.15	1.88e-07	5.77e-05
regulation of sister chromatid segregation (GO:0033045)	66	8	0.57	0	13.93	2.25e-07	6.61e-05
positive regulation of mitotic cell cycle (GO:0045931)	127	10	1.11	0	9.05	2.81e-07	8.1e-05
metaphase plate congression (GO:0051310)	46	7	0.4	0	17.49	3.28e-07	9.28e-05
mitotic spindle assembly (GO:0090307)	36	6	0.31	0	19.15	1.47e-06	0.000408
meiotic cell cycle (GO:0051321)	160	10	1.39	0	7.18	2.05e-06	0.000558
DNA metabolic process (GO:0006259)	564	18	4.91	0	3.67	2.31e-06	0.000618
negative regulation of mitotic metaphase/anaphase transition (GO:0045841)	22	5	0.19	0	26.12	3.04e-06	0.000768
chromosome condensation (GO:0030261)	22	5	0.19	0	26.12	3.04e-06	0.000781
negative regulation of metaphase/anaphase transition of cell cycle (GO:1902100)	22	5	0.19	0	26.12	3.04e-06	0.000796
negative regulation of chromosome separation (GO:1905819)	23	5	0.2	0	24.98	3.67e-06	0.000897
negative regulation of mitotic sister chromatid separation (GO:2000816)	23	5	0.2	0	24.98	3.67e-06	0.000912
spindle checkpoint (GO:0031577)	24	5	0.21	0	23.94	4.4e-06	0.00106
establishment of organelle localization (GO:0051656)	266	12	2.31	0	5.18	4.86e-06	0.00115
negative regulation of mitotic sister chromatid segregation (GO:0033048)	26	5	0.23	0	22.1	6.22e-06	0.00145
regulation of chromosome organization (GO:0033044)	281	12	2.45	0	4.91	8.3e-06	0.0019
negative regulation of sister chromatid segregation (GO:0033046)	28	5	0.24	0	20.52	8.56e-06	0.00193
regulation of cytokinesis (GO:0032465)	51	6	0.44	0	13.52	9.16e-06	0.00203
negative regulation of chromosome segregation (GO:0051985)	29	5	0.25	0	19.81	9.97e-06	0.00218
deoxyribonucleotide biosynthetic process (GO:0009263)	13	4	0.11	0	35.36	1.15e-05	0.0024
protein localization to chromosome (GO:0034502)	53	6	0.46	0	13.01	1.12e-05	0.00241
kinetochore organization (GO:0051383)	13	4	0.11	0	35.36	1.15e-05	0.00243
positive regulation of mitotic cell cycle phase transition (GO:1901992)	57	6	0.5	0	12.1	1.64e-05	0.00339
organelle localization (GO:0051640)	360	13	3.13	0	4.15	1.93e-05	0.00392
regulation of ubiquitin protein ligase activity (GO:1904666)	16	4	0.14	0	28.73	2.29e-05	0.00452
negative regulation of mitotic nuclear division (GO:0045839)	35	5	0.3	0	16.42	2.26e-05	0.00453
cellular component assembly (GO:0022607)	1640	31	14.27	0	2.17	2.52e-05	0.0049
mitotic metaphase plate congression (GO:0007080)	37	5	0.32	0	15.53	2.89e-05	0.00555
regulation of cyclin-dependent protein serine/threonine kinase activity (GO:0000079)	65	6	0.57	0	10.61	3.28e-05	0.00622
attachment of spindle microtubules to kinetochore (GO:0008608)	18	4	0.16	0	25.54	3.41e-05	0.0063
protein localization to chromosome centromeric region (GO:0071459)	18	4	0.16	0	25.54	3.41e-05	0.00638
spindle assembly checkpoint (GO:0071173)	19	4	0.17	0	24.19	4.1e-05	0.00739
positive regulation of cell cycle phase transition (GO:1901989)	68	6	0.59	0	10.14	4.15e-05	0.00739
mitotic spindle assembly checkpoint (GO:0007094)	19	4	0.17	0	24.19	4.1e-05	0.00748
negative regulation of nuclear division (GO:0051784)	41	5	0.36	0	14.01	4.52e-05	0.00776
regulation of cyclin-dependent protein kinase activity (GO:1904029)	69	6	0.6	0	9.99	4.48e-05	0.00778
negative regulation of cell cycle (GO:0045786)	335	12	2.92	0	4.12	4.44e-05	0.0078
mitotic spindle checkpoint (GO:0071174)	21	4	0.18	0	21.89	5.78e-05	0.0098
meiotic nuclear division (GO:0140013)	108	7	0.94	0	7.45	6.01e-05	0.0101
positive regulation of cytokinesis (GO:0032467)	24	4	0.21	0	19.15	9.17e-05	0.015
chromatin assembly (GO:0031497)	79	6	0.69	0	8.73	9.08e-05	0.015
meiotic cell cycle process (GO:1903046)	117	7	1.02	0	6.88	9.69e-05	0.0157
positive regulation of ubiquitin protein ligase activity (GO:1904668)	8	3	0.07	0	43.09	9.81e-05	0.0157
cellular component biogenesis (GO:0044085)	1833	32	15.95	0	2.01	0.000108	0.017
negative regulation of cell cycle phase transition (GO:1901988)	119	7	1.04	0	6.76	0.000107	0.017
regulation of cell cycle G2/M phase transition (GO:1902749)	82	6	0.71	0	8.41	0.00011	0.0171
DNA repair (GO:0006281)	373	12	3.25	0	3.7	0.00012	0.0184
anaphase-promoting complex-dependent catabolic process (GO:0031145)	9	3	0.08	0	38.3	0.00013	0.0197
cellular response to DNA damage stimulus (GO:0006974)	575	15	5	0	3	0.000162	0.0244
deoxyribonucleotide metabolic process (GO:0009262)	29	4	0.25	0	15.85	0.000177	0.0263
negative regulation of cell cycle process (GO:0010948)	175	8	1.52	0	5.25	0.000183	0.0269
chromatin organization (GO:0006325)	517	14	4.5	0	3.11	0.000187	0.0273
cell cycle checkpoint (GO:0000075)	132	7	1.15	0	6.09	0.000198	0.0285
macromolecular complex subunit organization (GO:0043933)	1178	23	10.25	0	2.24	0.000223	0.0318
chromatin assembly or disassembly (GO:0006333)	95	6	0.83	0	7.26	0.000235	0.0332
cell communication (GO:0007154)	2756	9	23.98	0	0.38	0.00028	0.038
sister chromatid cohesion (GO:0007062)	33	4	0.29	0	13.93	0.000279	0.0382
meiotic chromosome segregation (GO:0045132)	62	5	0.54	0	9.27	0.000276	0.0383
mitotic cell cycle checkpoint (GO:0007093)	98	6	0.85	0	7.04	0.000276	0.0386
negative regulation of organelle organization (GO:0010639)	294	10	2.56	0	3.91	0.000295	0.0398
nucleosome assembly (GO:0006334)	64	5	0.56	0	8.98	0.000317	0.0423
negative regulation of chromosome organization (GO:2001251)	101	6	0.88	0	6.83	0.000322	0.0425
regulation of organelle organization (GO:0033043)	1048	21	9.12	0	2.3	0.000351	0.046
regulation of G2/M transition of mitotic cell cycle (GO:0010389)	66	5	0.57	0	8.71	0.000362	0.047
