# Supplementary material for: Single-cell expression profiling reveals dynamic flux of cardiac stromal, vascular and immune cells in health and injury
Source: eLife journal article supplement (doi:10.7554/elife.43882), 2019-03-26
Supplement: supp [file elife-43882-supp-v1.zip › elife_poa_e43882_Supplementary_File_9.xlsx]

## Sheet: MYO-1 vs MYO-2 + MYO-3
Gene	pct.1	pct.2	p_val_adj	Log2FoldChange
Sfrp2	0.967	0.67	2.03168e-221	1.80238
Wisp2	0.945	0.581	2.63305e-204	1.46843
Eln	0.951	0.765	3.99019e-81	1.16295
Figf	0.487	0.085	1.3061e-139	1.15997
Cxcl12	0.691	0.366	1.60382e-85	1.07186
Apoe	0.737	0.553	1.20832e-45	1.07079
Fbln1	0.947	0.734	5.75901e-101	1.01077
C3	0.452	0.209	1.47093e-55	0.878701
Gucy1a3	0.827	0.429	1.58965e-116	0.862547
Sfrp1	0.987	0.871	1.18536e-111	0.848684
Thbs2	0.914	0.687	5.20308e-92	0.806455
Adamtsl2	0.638	0.331	8.59697e-64	0.789402
Igfbp4	0.974	0.915	5.9155e-64	0.784685
Id2	0.775	0.441	4.43765e-82	0.766942
Mfap4	0.998	0.973	1.41123e-124	0.719867
Matn4	0.497	0.209	1.43574e-57	0.684168
Htra3	0.879	0.65	1.33445e-54	0.668521
Gm26771	0.67	0.264	7.115e-106	0.665794
Pdlim3	0.673	0.392	1.31458e-59	0.650219
Il11ra1	0.945	0.801	7.43803e-78	0.649012
Sod3	0.9	0.627	5.2563e-87	0.646268
Sepp1	0.953	0.819	5.68503e-55	0.623315
Serping1	0.988	0.901	6.97846e-64	0.620961
Mmp23	0.946	0.786	1.66095e-80	0.589146
Plac8	0.365	0.156	4.44755e-33	0.557725
Dpt	0.975	0.883	9.7367e-53	0.555285
Clec3b	0.38	0.14	4.54746e-45	0.554896
Cxcl1	0.43	0.285	3.85694e-12	0.552048
Gpx3	0.978	0.905	5.85513e-49	0.547178
Myl9	0.699	0.437	1.45935e-44	0.542044
1500015O10Rik	0.853	0.701	5.23581e-27	0.541761
Ly6a	0.445	0.289	6.12092e-16	0.532807
Ptn	0.935	0.827	3.81759e-25	0.518676
Fgl2	0.494	0.253	1.84817e-38	0.516672
Htra1	0.586	0.285	7.2939e-57	0.506333
Igfbp7	1	1	1.22692e-61	-0.511461
Sox4	0.648	0.755	6.93165e-49	-0.517477
Creb3l2	0.792	0.84	4.97584e-73	-0.526845
Ckb	0.766	0.787	4.07008e-42	-0.529374
Mafb	0.163	0.308	7.26135e-43	-0.530857
Lmo4	0.868	0.87	3.67236e-55	-0.535222
Ttc9	0.062	0.289	1.26277e-82	-0.549187
Spon2	0.162	0.28	1.03883e-19	-0.549883
Cst6	0.206	0.324	1.66997e-40	-0.551178
Sulf1	0.574	0.705	1.97724e-63	-0.56432
Ecm2	0.556	0.658	2.40238e-71	-0.566117
Rnf149	0.344	0.517	1.02111e-98	-0.598629
Enpp1	0.519	0.666	1.00898e-77	-0.614933
Col12a1	0.509	0.563	4.09473e-77	-0.617336
Slc39a1	0.629	0.659	9.07173e-50	-0.621103
Bhlhe41	0.207	0.414	8.01632e-70	-0.625018
Col6a3	0.756	0.796	5.31811e-49	-0.644244
Scx	0.239	0.381	2.3524e-35	-0.711935
Fam101b	0.765	0.831	4.42583e-51	-0.750438
Fibin	0.739	0.786	1.85651e-56	-0.76502
Actb	0.995	0.997	2.15207e-47	-0.792362
Ccnd2	0.463	0.621	3.55957e-86	-0.80572
Tgfb1	0.277	0.53	5.92845e-149	-0.814722
Cdkn1a	0.249	0.405	1.68139e-27	-0.834013
Col4a2	0.869	0.936	4.91205e-128	-0.852589
Mgp	1	0.999	6.38241e-45	-0.854004
Mfap5	0.994	0.995	1.48485e-118	-0.867582
Timp1	0.928	0.875	3.73381e-78	-0.873898
Pam	0.966	0.975	1.21167e-86	-0.888163
Igfbp6	0.414	0.566	2.27666e-65	-0.925046
Col4a1	0.859	0.922	3.04994e-144	-0.963968
Sparcl1	0.449	0.659	3.87587e-81	-0.995664
Meox1	0.686	0.823	4.15591e-120	-1.05855
Oaf	0.782	0.846	2.60024e-196	-1.0887
Serpine2	0.724	0.834	9.99175e-109	-1.23395
Crlf1	0.386	0.654	4.34376e-119	-1.24024
Col15a1	0.523	0.86	1.99983e-247	-1.59778
Cilp	0.543	0.785	3.20792e-168	-1.79915
Thbs4	0.131	0.451	3.6736e-122	-2.22306

## Sheet: MYO2 vs MYO-1 + MYO-3
Gene	pct.1	pct.2	p_val_adj	Log2FoldChange
Thbs4	0.541	0.131	2.13969e-163	2.4203
Cilp	0.871	0.531	5.91503e-208	1.89934
Col15a1	0.945	0.53	4.7271e-270	1.5432
Serpine2	0.903	0.698	1.97003e-133	1.3465
Crlf1	0.734	0.382	2.38445e-138	1.31143
Oaf	0.929	0.737	4.91666e-199	1.18547
Sparcl1	0.761	0.42	1.19561e-123	1.17972
Igfbp6	0.652	0.384	1.22985e-89	1.10146
Timp1	0.92	0.887	4.25826e-87	1.06744
Mest	0.261	0.11	3.76715e-48	1.04212
Meox1	0.881	0.673	5.16091e-107	1.00667
Mgp	1	0.999	3.81429e-65	0.96056
Mfap5	0.998	0.992	4.14257e-158	0.944732
Cdkn1a	0.449	0.248	2.43835e-33	0.874433
Tgfb1	0.622	0.263	4.52519e-128	0.872954
Col4a1	0.96	0.846	2.32508e-115	0.846068
Col4a2	0.975	0.855	1.58849e-117	0.792364
Fibin	0.822	0.723	3.71417e-52	0.774271
Ccnd2	0.683	0.451	1.48088e-65	0.765152
Gsn	0.982	0.955	1.39275e-30	0.748052
Spon2	0.341	0.144	7.94608e-39	0.718211
Col6a3	0.863	0.718	5.32671e-53	0.704401
Ckb	0.878	0.709	4.28231e-63	0.698296
Igfbp7	1	1	9.48514e-155	0.687815
Cd9	0.895	0.748	1.57666e-53	0.67453
Ecm2	0.749	0.514	4.4794e-76	0.664097
Pla1a	0.304	0.084	3.51874e-64	0.641641
Scx	0.409	0.248	4.69251e-25	0.639296
Mafb	0.366	0.152	2.85834e-54	0.629981
Capg	0.676	0.477	9.62678e-73	0.629964
Rnf149	0.591	0.327	2.10477e-75	0.62752
Anxa1	0.899	0.787	6.82175e-61	0.617166
Col12a1	0.607	0.489	6.09292e-51	0.60796
Cst6	0.368	0.199	6.82938e-40	0.600426
Fam101b	0.847	0.767	3.44057e-28	0.599249
Col6a2	0.957	0.885	2.17331e-67	0.588629
Col6a1	0.981	0.957	1.85287e-70	0.588386
Pi16	0.767	0.622	9.32192e-24	0.573897
Abca8a	0.541	0.343	1.80902e-36	0.572751
Enpp1	0.733	0.501	3.63043e-54	0.568463
Tnc	0.429	0.321	1.50192e-24	0.552353
Ttc9	0.343	0.069	2.68079e-76	0.550637
Slc20a1	0.312	0.107	3.00174e-55	0.539276
Anxa5	0.984	0.925	3.64505e-56	0.530998
Pdlim1	0.79	0.647	1.20478e-49	0.530489
Plpp3	0.714	0.564	1.20671e-27	0.525371
Mmp2	0.965	0.933	9.43749e-39	0.510325
Sox4	0.82	0.624	1.71476e-43	0.503011
Htra3	0.675	0.818	1.50154e-24	-0.503279
Sepp1	0.847	0.909	8.0665e-28	-0.507732
Mmp23	0.836	0.881	4.76338e-60	-0.51122
H19	0.211	0.341	1.93051e-10	-0.512419
Myl9	0.446	0.643	1.66032e-30	-0.514279
Timp3	0.823	0.935	4.44303e-37	-0.516041
Col11a1	0.228	0.402	2.1553e-19	-0.516514
Cxcl1	0.285	0.402	7.72441e-08	-0.528722
Heg1	0.711	0.843	7.12984e-43	-0.53571
Col14a1	0.913	0.966	4.02494e-69	-0.554463
Mfap4	0.978	0.99	5.87125e-59	-0.565666
Il11ra1	0.849	0.884	7.38783e-63	-0.586056
Pdlim3	0.413	0.606	1.3356e-41	-0.599334
Plac8	0.15	0.329	9.07038e-25	-0.613295
1500015O10Rik	0.689	0.832	2.09174e-31	-0.660468
Sod3	0.634	0.843	4.18274e-72	-0.668598
Igfbp4	0.932	0.951	4.23131e-49	-0.717778
C3	0.221	0.398	4.06918e-33	-0.745327
Adamtsl2	0.331	0.579	8.31928e-48	-0.77112
Apoe	0.602	0.669	2.78229e-17	-0.780884
Matn4	0.188	0.457	4.61073e-61	-0.805053
Id2	0.434	0.716	2.16945e-67	-0.806073
Fbln1	0.748	0.897	6.02359e-59	-0.841214
Thbs2	0.692	0.867	3.42407e-109	-0.96072
Gucy1a3	0.408	0.765	4.71221e-109	-1.04606
Sfrp1	0.861	0.972	3.12791e-131	-1.05289
Figf	0.07	0.42	8.26221e-126	-1.15318
Gm26771	0.201	0.635	3.07087e-151	-1.16631
Cxcl12	0.356	0.636	3.68337e-101	-1.27556
Eln	0.738	0.934	9.68377e-116	-1.61916
Wisp2	0.53	0.91	2.92987e-226	-1.79785
Sfrp2	0.623	0.942	1.5774e-250	-2.25076

## Sheet: MYO-3 vs MYO-1 + MYO-2
Gene	pct.1	pct.2	p_val_adj	Log2FoldChange
Pam	0.988	0.968	2.5955e-195	1.71774
Slc39a1	0.914	0.61	6.04304e-185	1.69424
Actb	1	0.995	1.57456e-125	1.55033
Ubb	0.953	1	5.29999e-121	-0.67746
Nfia	0.881	0.826	1.12897e-116	1.10898
Notch2	0.561	0.291	1.70704e-109	1.0695
Abhd2	0.525	0.288	2.26807e-93	1.01073
Kdelr2	0.905	0.878	5.32758e-87	0.973935
Alkbh5	0.442	0.427	2.28103e-86	0.609615
Klhl9	0.454	0.434	3.47097e-86	0.566502
Cbx3	0.801	0.801	5.67695e-82	0.777967
Skil	0.605	0.591	3.15966e-78	0.679321
Itm2b	0.908	0.999	3.47726e-70	-0.817419
Rpgrip1	0.32	0.151	7.96497e-69	0.669999
Cd63	0.748	0.985	6.65131e-64	-0.753638
Pcolce	0.766	0.983	1.923e-61	-0.909676
Fcgrt	0.442	0.861	4.27193e-61	-0.536152
Serpinf1	0.757	0.982	5.33107e-57	-0.802366
Anxa5	0.733	0.977	1.05774e-56	-0.73234
Plpp1	0.288	0.734	9.82297e-56	-0.605849
Myh9	0.632	0.655	1.55321e-54	0.569217
Gsn	0.807	0.986	1.45696e-53	-1.24087
Rcn3	0.718	0.975	2.21803e-53	-0.605076
Lrrc8a	0.463	0.387	7.376e-53	0.614546
Maged2	0.353	0.774	3.35558e-52	-0.578166
Pdia6	0.626	0.948	3.99427e-52	-0.569793
Prdx4	0.329	0.753	7.99692e-52	-0.582971
Atp5b	0.555	0.91	2.08067e-50	-0.512398
Spry2	0.309	0.181	2.61106e-48	0.71238
B4galt1	0.543	0.561	2.64097e-47	0.521131
Anxa2	0.718	0.969	2.09565e-46	-0.643274
Ctsl	0.789	0.983	1.08843e-44	-0.623478
Picalm	0.721	0.77	1.25776e-43	0.542901
Ctsk	0.377	0.765	3.25976e-43	-0.501575
Igfbp7	1	1	1.15532e-38	-0.50721
Olfml3	0.487	0.828	7.83316e-38	-0.544433
H2-D1	0.564	0.883	1.21612e-37	-0.535854
Dcn	0.991	0.999	2.90648e-35	-0.819713
Sox9	0.596	0.659	1.44898e-32	0.506933
Tagln2	0.777	0.968	4.66166e-31	-0.534932
Tuba1a	0.73	0.953	1.01355e-30	-0.508652
Serping1	0.789	0.963	1.85281e-29	-0.642196
Apoe	0.38	0.675	4.23548e-29	-1.1291
Bhlhe41	0.404	0.303	1.69049e-28	0.592812
Gm26771	0.49	0.456	5.67234e-28	0.691687
Sparcl1	0.297	0.591	6.98516e-28	-0.643046
Tmem176a	0.184	0.482	6.81462e-27	-0.507408
Pmepa1	0.902	0.926	1.26838e-26	0.562597
Neat1	0.813	0.878	1.20029e-25	0.568631
Lpl	0.412	0.688	2.73119e-25	-0.501694
Timp1	0.715	0.924	1.07385e-23	-0.639899
Cd9	0.57	0.838	1.96052e-23	-0.529056
Ctgf	0.816	0.805	1.06757e-22	0.669256
Htra3	0.561	0.786	3.34942e-19	-0.567287
Lum	0.932	0.988	3.74333e-19	-0.59898
Igfbp6	0.258	0.523	6.15928e-19	-0.596116
Mfap4	0.955	0.989	1.10152e-18	-0.550466
Fbln1	0.685	0.856	1.9113e-18	-0.700451
Dpep1	0.134	0.345	2.45131e-18	-0.556387
Cilp	0.481	0.692	1.10855e-12	-0.723142
Timp3	0.899	0.889	1.82679e-12	0.541986
Thbs4	0.131	0.319	7.55383e-12	-1.29662
C3	0.166	0.346	3.06634e-11	-0.546103
Acta2	0.448	0.624	9.49001e-10	-0.674406
