# Supplementary material for: Single-cell expression profiling reveals dynamic flux of cardiac stromal, vascular and immune cells in health and injury
Source: eLife journal article supplement (doi:10.7554/elife.43882), 2019-03-26
Supplement: supp [file elife-43882-supp-v1.zip › elife_poa_e43882_Supplementary_File_10.xlsx]

## Sheet: MYO-1 vs MYO-2+MYO-3
Analysis Type:	PANTHER Overrepresentation Test (Released 20171205)
Annotation Version and Release Date:	GO Ontology database Released 2017-12-27
Analyzed List:	upload_1 (Mus musculus)
Reference List:	Day7_MIvsSham_expressed_genes.txt (Mus musculus)	There are duplicate IDs in the file. The unique set of IDs will be used.
Test Type:	FISHER
GO biological process complete	Day7_MIvsSham_expressed_genes.txt - REFLIST (13217)	upload_1 (33)	upload_1 (expected)	upload_1 (over/under)	upload_1 (fold Enrichment)	upload_1 (raw P-value)	upload_1 (FDR)
negative regulation of planar cell polarity pathway involved in axis elongation (GO:2000041)	2	2	0	0	> 100	3.6e-05	0.0259
regulation of planar cell polarity pathway involved in axis elongation (GO:2000040)	2	2	0	0	> 100	3.6e-05	0.0247
negative regulation of B cell differentiation (GO:0045578)	3	2	0.01	0	> 100	5.99e-05	0.0375
Wnt signaling pathway involved in somitogenesis (GO:0090244)	3	2	0.01	0	> 100	5.99e-05	0.0359
regulation of midbrain dopaminergic neuron differentiation (GO:1904956)	3	2	0.01	0	> 100	5.99e-05	0.0345
dopaminergic neuron differentiation (GO:0071542)	19	3	0.05	0	63.24	2.1e-05	0.0216
negative regulation of BMP signaling pathway (GO:0030514)	38	4	0.09	0	42.16	3.34e-06	0.00601
protein activation cascade (GO:0072376)	30	3	0.07	0	40.05	7.3e-05	0.0376
negative regulation of transmembrane receptor protein serine/threonine kinase signaling pathway (GO:0090101)	86	5	0.21	0	23.29	2.79e-06	0.00574
regulation of BMP signaling pathway (GO:0030510)	71	4	0.18	0	22.56	3.42e-05	0.0259
negative regulation of cellular response to growth factor stimulus (GO:0090288)	108	5	0.27	0	18.54	8.1e-06	0.0117
coagulation (GO:0050817)	93	4	0.23	0	17.23	9.38e-05	0.0466
blood coagulation (GO:0007596)	93	4	0.23	0	17.23	9.38e-05	0.0451
hemostasis (GO:0007599)	95	4	0.24	0	16.86	0.000102	0.0457
extracellular structure organization (GO:0043062)	152	6	0.38	0	15.81	2.22e-06	0.00639
extracellular matrix organization (GO:0030198)	152	6	0.38	0	15.81	2.22e-06	0.00533
positive regulation of epithelial cell proliferation (GO:0050679)	142	5	0.35	0	14.1	2.9e-05	0.0246
negative regulation of cell motility (GO:2000146)	202	6	0.5	0	11.9	1.08e-05	0.0142
regulation of transmembrane receptor protein serine/threonine kinase signaling pathway (GO:0090092)	172	5	0.43	0	11.64	7.04e-05	0.0376
regulation of cellular response to growth factor stimulus (GO:0090287)	211	6	0.53	0	11.39	1.38e-05	0.0165
negative regulation of cellular component movement (GO:0051271)	214	6	0.53	0	11.23	1.49e-05	0.0165
regulation of epithelial cell proliferation (GO:0050678)	264	7	0.66	0	10.62	3.75e-06	0.00601
negative regulation of locomotion (GO:0040013)	229	6	0.57	0	10.49	2.17e-05	0.0208
regulation of cell growth (GO:0001558)	330	8	0.82	0	9.71	1.31e-06	0.00473
regulation of developmental growth (GO:0048638)	284	6	0.71	0	8.46	7.03e-05	0.0389
regulation of growth (GO:0040008)	549	10	1.37	0	7.3	6.34e-07	0.00304
positive regulation of cell proliferation (GO:0008284)	674	11	1.68	0	6.54	4.43e-07	0.00638
negative regulation of cell proliferation (GO:0008285)	508	8	1.27	0	6.31	2.94e-05	0.0235
negative regulation of multicellular organismal process (GO:0051241)	845	10	2.11	0	4.74	2.81e-05	0.0253
regulation of cell proliferation (GO:0042127)	1212	14	3.03	0	4.63	4.75e-07	0.00342
regulation of anatomical structure morphogenesis (GO:0022603)	783	9	1.95	0	4.6	9.77e-05	0.0454
regulation of multicellular organismal process (GO:0051239)	2083	15	5.2	0	2.88	5.64e-05	0.0369

## Sheet: MYO-2 vs MYO-1 + MYO-3
Analysis Type:	PANTHER Overrepresentation Test (Released 20171205)
Annotation Version and Release Date:	GO Ontology database Released 2017-12-27
Analyzed List:	upload_1 (Mus musculus)
Reference List:	Day7_MIvsSham_expressed_genes.txt (Mus musculus)	There are duplicate IDs in the file. The unique set of IDs will be used.
Test Type:	FISHER
GO biological process complete	Day7_MIvsSham_expressed_genes.txt - REFLIST (13217)	upload_1 (52)	upload_1 (expected)	upload_1 (over/under)	upload_1 (fold Enrichment)	upload_1 (raw P-value)	upload_1 (FDR)
heart valve morphogenesis (GO:0003179)	38	4	0.15	0	26.76	2.1e-05	0.0433
cell adhesion (GO:0007155)	535	12	2.1	0	5.7	9.74e-07	0.014
biological adhesion (GO:0022610)	544	12	2.14	0	5.61	1.16e-06	0.00834
epithelium development (GO:0060429)	711	12	2.8	0	4.29	1.72e-05	0.0495
response to endogenous stimulus (GO:0009719)	791	13	3.11	0	4.18	9.42e-06	0.0452
tissue development (GO:0009888)	1126	15	4.43	0	3.39	2.02e-05	0.0485
response to organic substance (GO:0010033)	1679	19	6.61	0	2.88	1.13e-05	0.0405

## Sheet: MYO-3 vs MYO-1 + MYO-2
Annotation Version and Release Date:	GO Ontology database Released 2017-12-27
Analyzed List:	upload_1 (Mus musculus)
Reference List:	Day7_MIvsSham_expressed_genes.txt (Mus musculus)	There are duplicate IDs in the file. The unique set of IDs will be used.
Test Type:	FISHER
GO biological process complete	Day7_MIvsSham_expressed_genes.txt - REFLIST (13217)	upload_1 (23)	upload_1 (expected)	upload_1 (over/under)	upload_1 (fold Enrichment)	upload_1 (raw P-value)	upload_1 (FDR)
anatomical structure morphogenesis (GO:0009653)	1560	12	2.71	0	4.42	2.89e-06	0.0417
