# Supplementary material for: Single-cell expression profiling reveals dynamic flux of cardiac stromal, vascular and immune cells in health and injury
Source: eLife journal article supplement (doi:10.7554/elife.43882), 2019-03-26
Supplement: supp [file elife-43882-supp-v1.zip › elife_poa_e43882_Supplementary_File_11.xlsx]

## Sheet: Tgfb_treatment_vs_basal_DEGs_cl
Cluster1	Cluster2	Rho	PValue	Padj
F-Act	F-SH	0.585459	0	0
MYO-2	F-Trans	0.569869	0	0
MYO-2	F-SL	0.560944	0	0
MYO-2	F-SH	0.546259	0	0
MYO-3	F-Trans	0.512674	0	0
MYO-3	F-SL	0.497304	0	0
MYO-3	F-SH	0.488198	0	0
MYO-2	F-IFNS	0.481024	0	0
F-Act	F-Trans	0.478884	0	0
F-Act	F-SL	0.478239	0	0
MYO-1	F-Trans	0.470862	0	0
F-IFNS	F-SL	0.460688	0	0
F-IFNS	F-Trans	0.448547	0	0
F-IFNS	F-SH	0.4452	0	0
MYO-1	F-SL	0.444879	0	0
MYO-2	EPI	0.435289	0	0
MYO-1	F-SH	0.427935	0	0
F-Cyc	F-SH	0.42483	0	0
F-Cyc	F-SL	0.418673	0	0
MYO-3	EPI	0.417732	0	0
MYO-2	F-Act	0.392819	0	0
MYO-2	F-WntX	0.38926	0	0
F-Cyc	F-Trans	0.38455	0	0
MYO-1	EPI	0.363644	0	0
MYO-3	F-WntX	0.359749	0	0
MYO-3	F-IFNS	0.35473	0	0
MYO-3	F-Act	0.319225	2.84295e-18	3.12724e-16
MYO-1	F-WntX	0.271763	1.47488e-15	1.62237e-13
F-Cyc	EPI	0.268171	5.31121e-17	5.84233e-15
MYO-2	MYO-1	0.263285	1.75823e-14	1.93405e-12
MYO-1	F-IFNS	0.255067	1.23345e-13	1.3568e-11
MYO-3	MYO-1	0.247684	1.59422e-12	1.75364e-10
F-WntX	F-Trans	0.222601	3.15351e-09	3.46886e-07
MYO-2	F-Cyc	0.219572	6.34299e-11	7e-09
MYO-1	F-Act	0.209909	8.85782e-10	9.74361e-08
F-IFNS	EPI	0.206457	4.32261e-10	4.75487e-08
F-Cyc	F-WntX	0.197005	3.81901e-09	4.20092e-07
MYO-3	F-Cyc	0.192659	1.84471e-08	2.02918e-06
F-WntX	F-SL	0.19024	3.35876e-07	3.69464e-05
F-Cyc	F-Act	0.187054	3.67489e-08	4.04238e-06
F-Act	EPI	0.18114	5.73679e-08	6.31047e-06
F-WntX	F-SH	0.169268	2.673e-06	0.000294031
F-IFNS	F-WntX	0.141229	4.09598e-05	0.00450558
F-Cyc	F-IFNS	0.128038	0.000101366	0.0111503
F-Act	F-WntX	0.125216	0.000360672	0.0396739
F-IFNS	F-Act	0.0980915	0.00365871	0.402458
MYO-1	F-Cyc	0.0776251	0.0109512	1
EPI	F-SL	0.0769296	0.0134855	1
F-WntX	EPI	0.0730818	0.0168932	1
EPI	F-SH	0.071809	0.018565	1
EPI	F-Trans	0.056585	0.0515435	1
F-Trans	F-SL	0.0463149	0.125876	1
F-Trans	F-SH	0.0270329	0.244508	1
F-SH	F-SL	0.0150206	0.351985	1
MYO-3	MYO-2	0.0119033	0.373632	1
MYO-2	MYO-3	-0.0119033	0.626368	1
F-SL	F-SH	-0.0150206	0.648016	1
F-SH	F-Trans	-0.0270329	0.755492	1
F-SL	F-Trans	-0.0463149	0.874124	1
F-Trans	EPI	-0.056585	0.948457	1
F-SH	EPI	-0.071809	0.981435	1
EPI	F-WntX	-0.0730818	0.983107	1
F-SL	EPI	-0.0769296	0.986515	1
F-Cyc	MYO-1	-0.0776251	0.989049	1
F-Act	F-IFNS	-0.0980915	0.996341	1
F-WntX	F-Act	-0.125216	0.999639	1
F-IFNS	F-Cyc	-0.128038	0.999899	1
F-WntX	F-IFNS	-0.141229	0.999959	1
F-SH	F-WntX	-0.169268	0.999997	1
EPI	F-Act	-0.18114	1	1
F-Act	F-Cyc	-0.187054	1	1
F-SL	F-WntX	-0.19024	1	1
F-Cyc	MYO-3	-0.192659	1	1
F-WntX	F-Cyc	-0.197005	1	1
EPI	F-IFNS	-0.206457	1	1
F-Act	MYO-1	-0.209909	1	1
F-Cyc	MYO-2	-0.219572	1	1
F-Trans	F-WntX	-0.222601	1	1
MYO-1	MYO-3	-0.247684	1	1
F-IFNS	MYO-1	-0.255067	1	1
MYO-1	MYO-2	-0.263285	1	1
EPI	F-Cyc	-0.268171	1	1
F-WntX	MYO-1	-0.271763	1	1
F-Act	MYO-3	-0.319225	1	1
F-IFNS	MYO-3	-0.35473	1	1
F-WntX	MYO-3	-0.359749	1	1
EPI	MYO-1	-0.363644	1	1
F-Trans	F-Cyc	-0.38455	1	1
F-WntX	MYO-2	-0.38926	1	1
F-Act	MYO-2	-0.392819	1	1
EPI	MYO-3	-0.417732	1	1
F-SL	F-Cyc	-0.418673	1	1
F-SH	F-Cyc	-0.42483	1	1
F-SH	MYO-1	-0.427935	1	1
EPI	MYO-2	-0.435289	1	1
F-SL	MYO-1	-0.444879	1	1
F-SH	F-IFNS	-0.4452	1	1
F-Trans	F-IFNS	-0.448547	1	1
F-SL	F-IFNS	-0.460688	1	1
F-Trans	MYO-1	-0.470862	1	1
F-SL	F-Act	-0.478239	1	1
F-Trans	F-Act	-0.478884	1	1
F-IFNS	MYO-2	-0.481024	1	1
F-SH	MYO-3	-0.488198	1	1
F-SL	MYO-3	-0.497304	1	1
F-Trans	MYO-3	-0.512674	1	1
F-SH	MYO-2	-0.546259	1	1
F-SL	MYO-2	-0.560944	1	1
F-Trans	MYO-2	-0.569869	1	1
F-SH	F-Act	-0.585459	1	1
