# Supplementary figures and images for: Single-cell expression profiling reveals dynamic flux of cardiac stromal, vascular and immune cells in health and injury
Source: eLife journal article supplement (doi:10.7554/elife.43882), 2019-03-26

Figure 4 - figure supplement 1

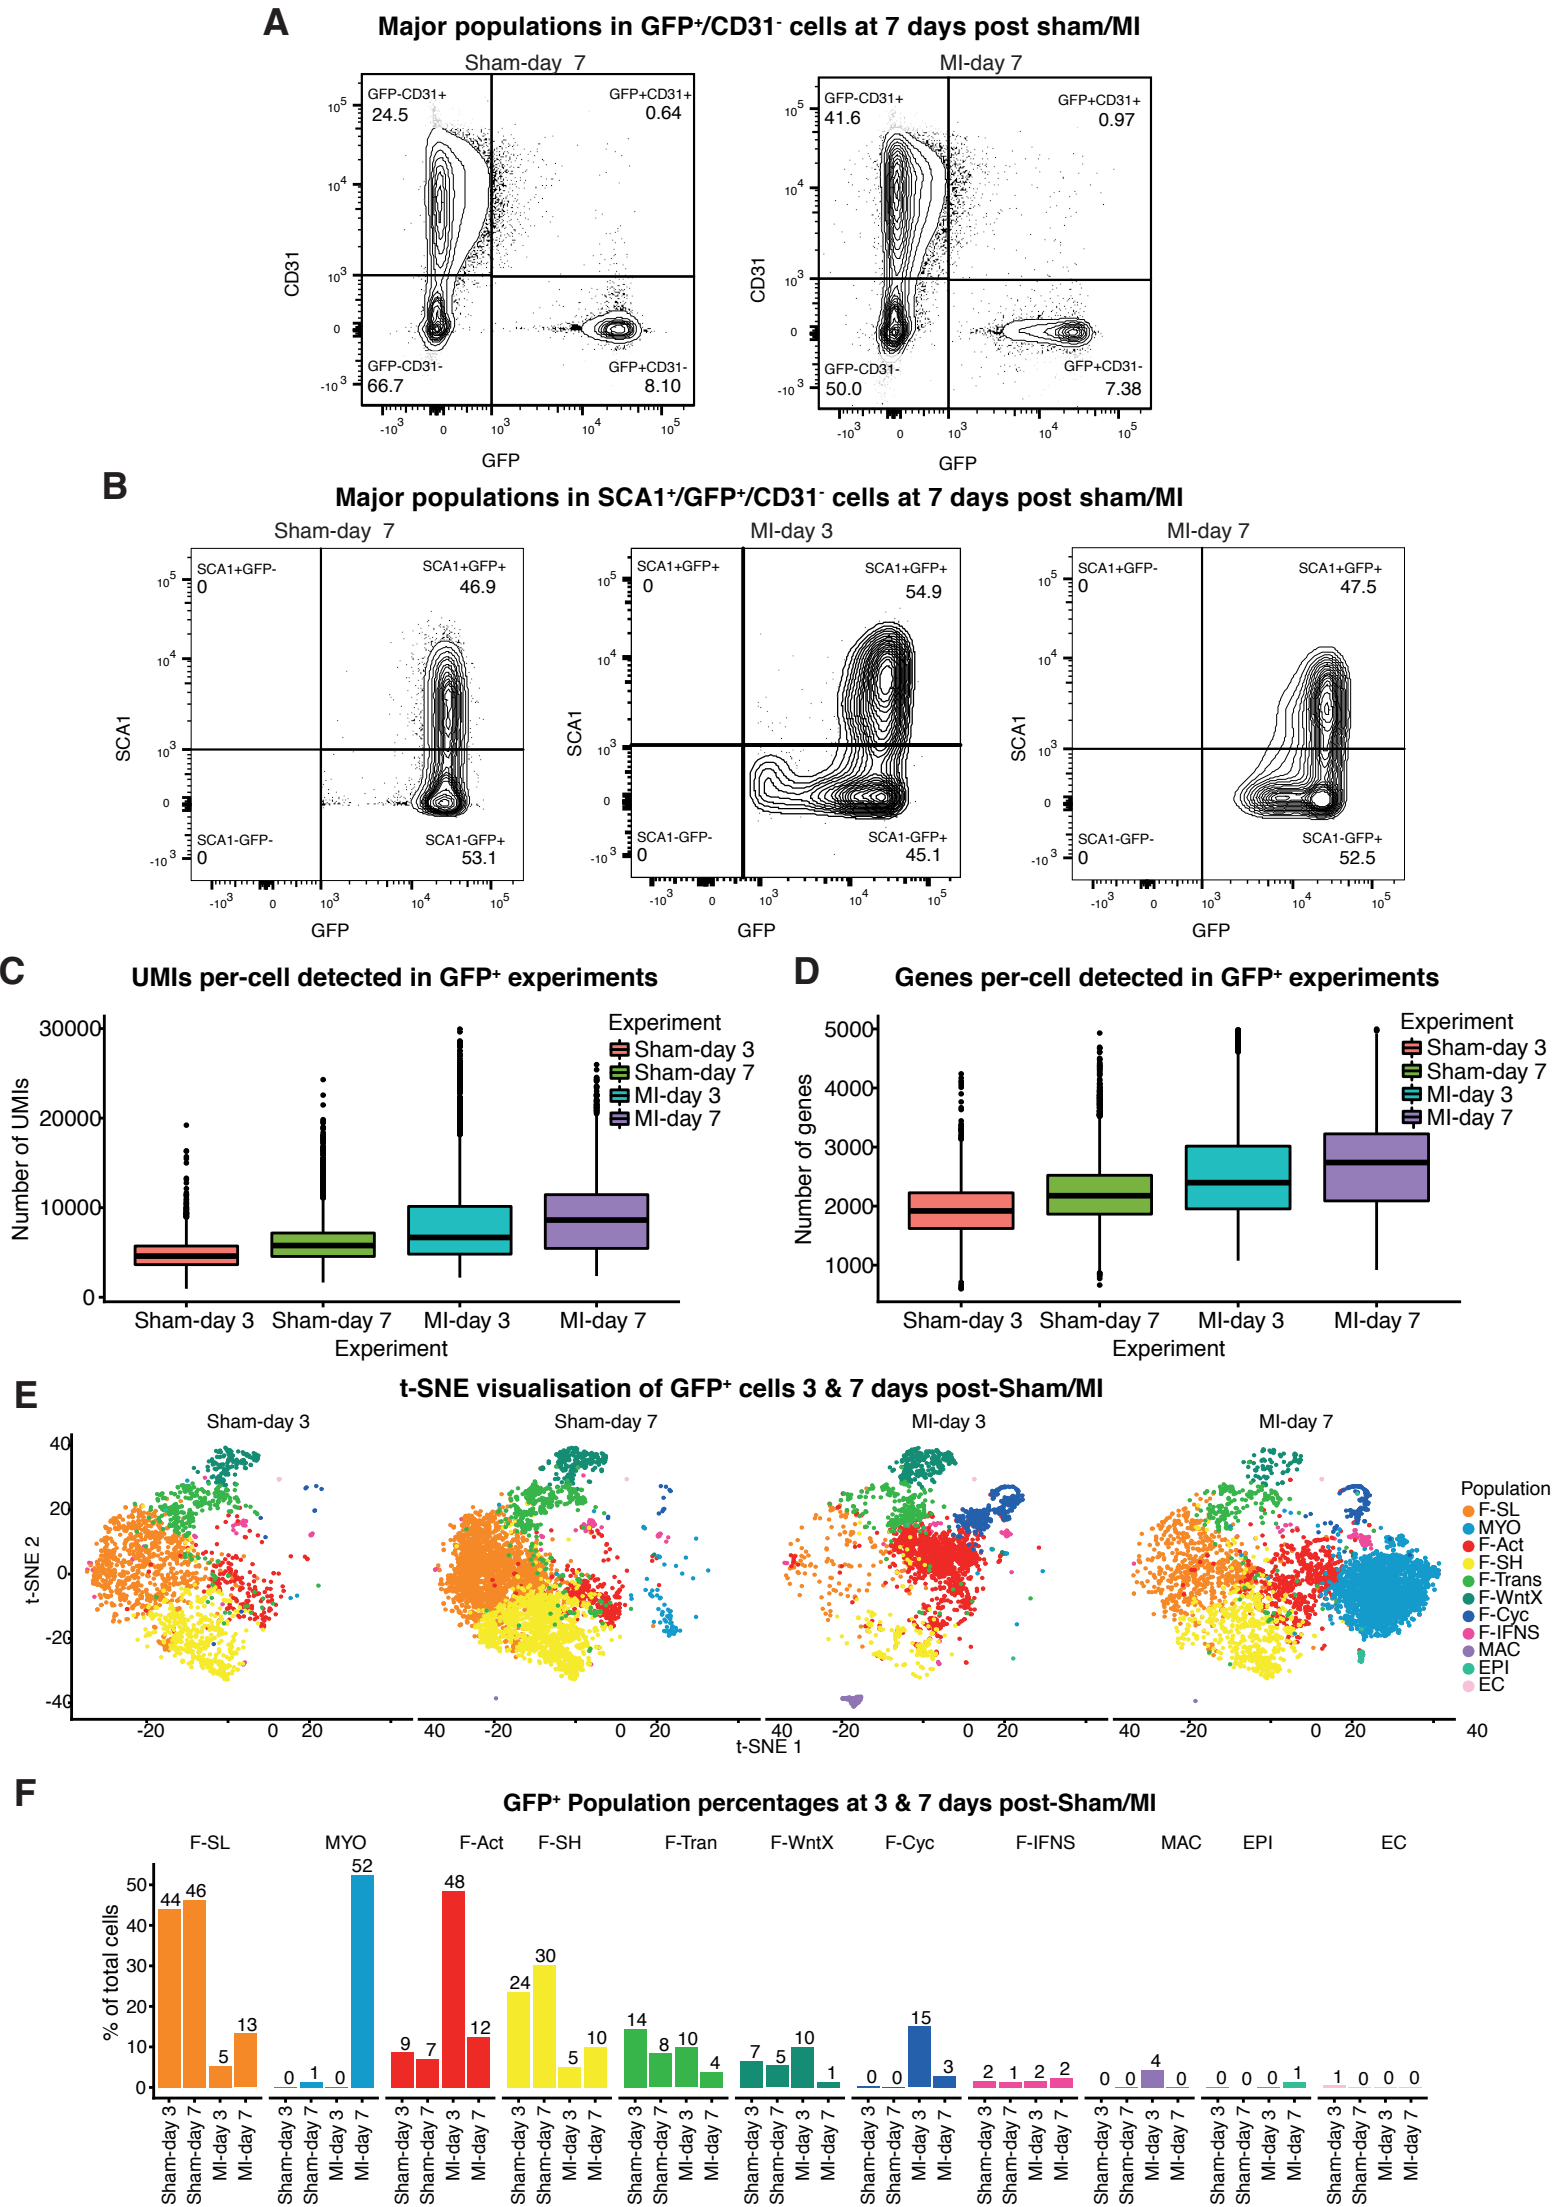

Supplement: supp [file elife-43882-supp-v1.zip]

Figure 4 - figure supplement 2

**A**

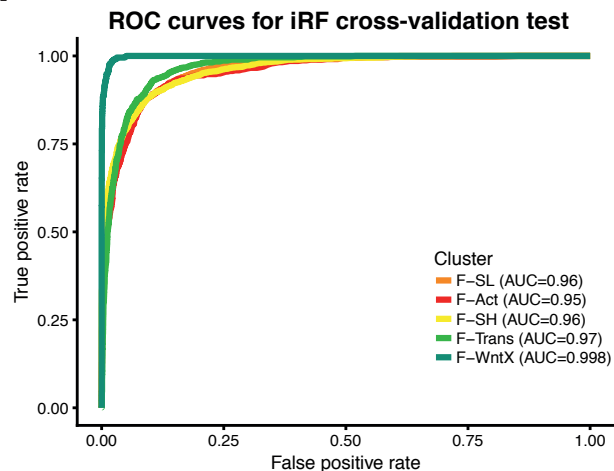

**B**

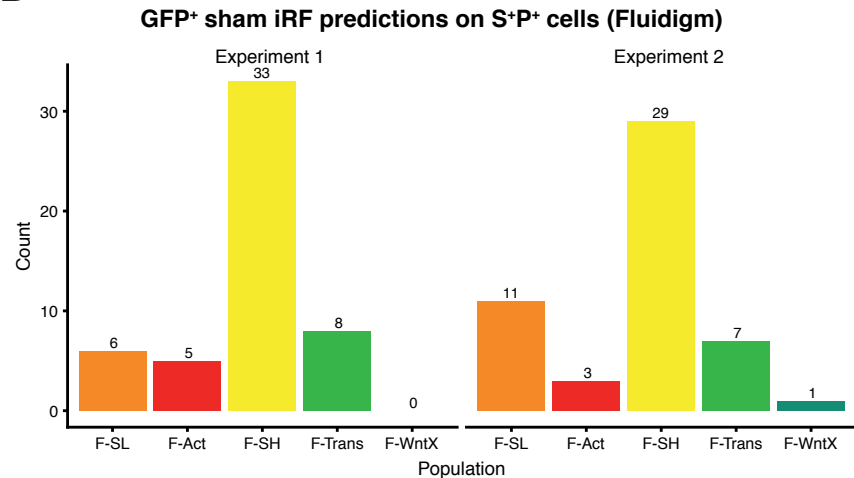

**C**

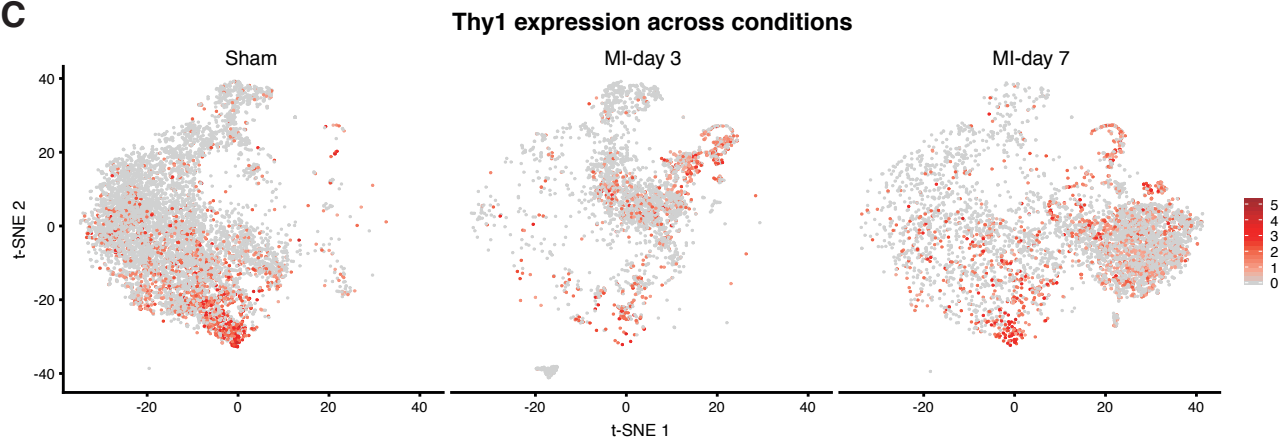

**D**

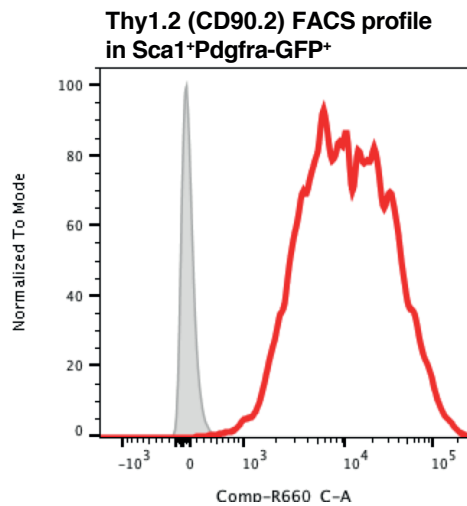

**E**

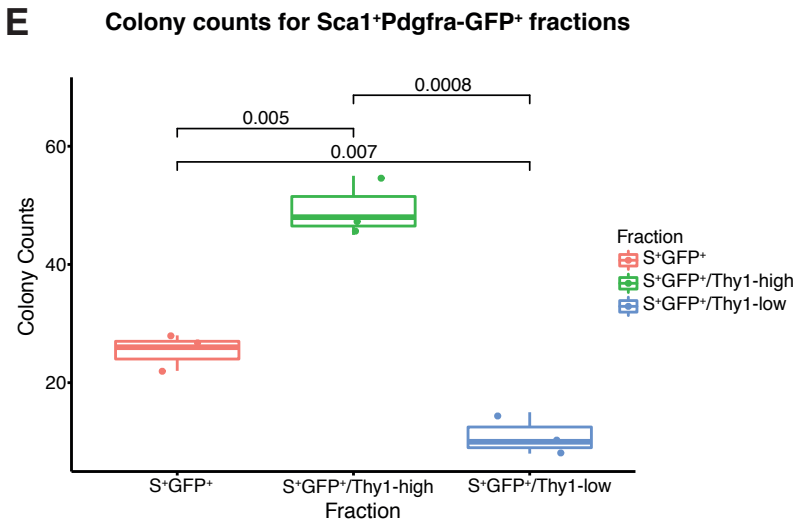

Supplement: supp [file elife-43882-supp-v1.zip]

Figure 2 - figure supplement 1

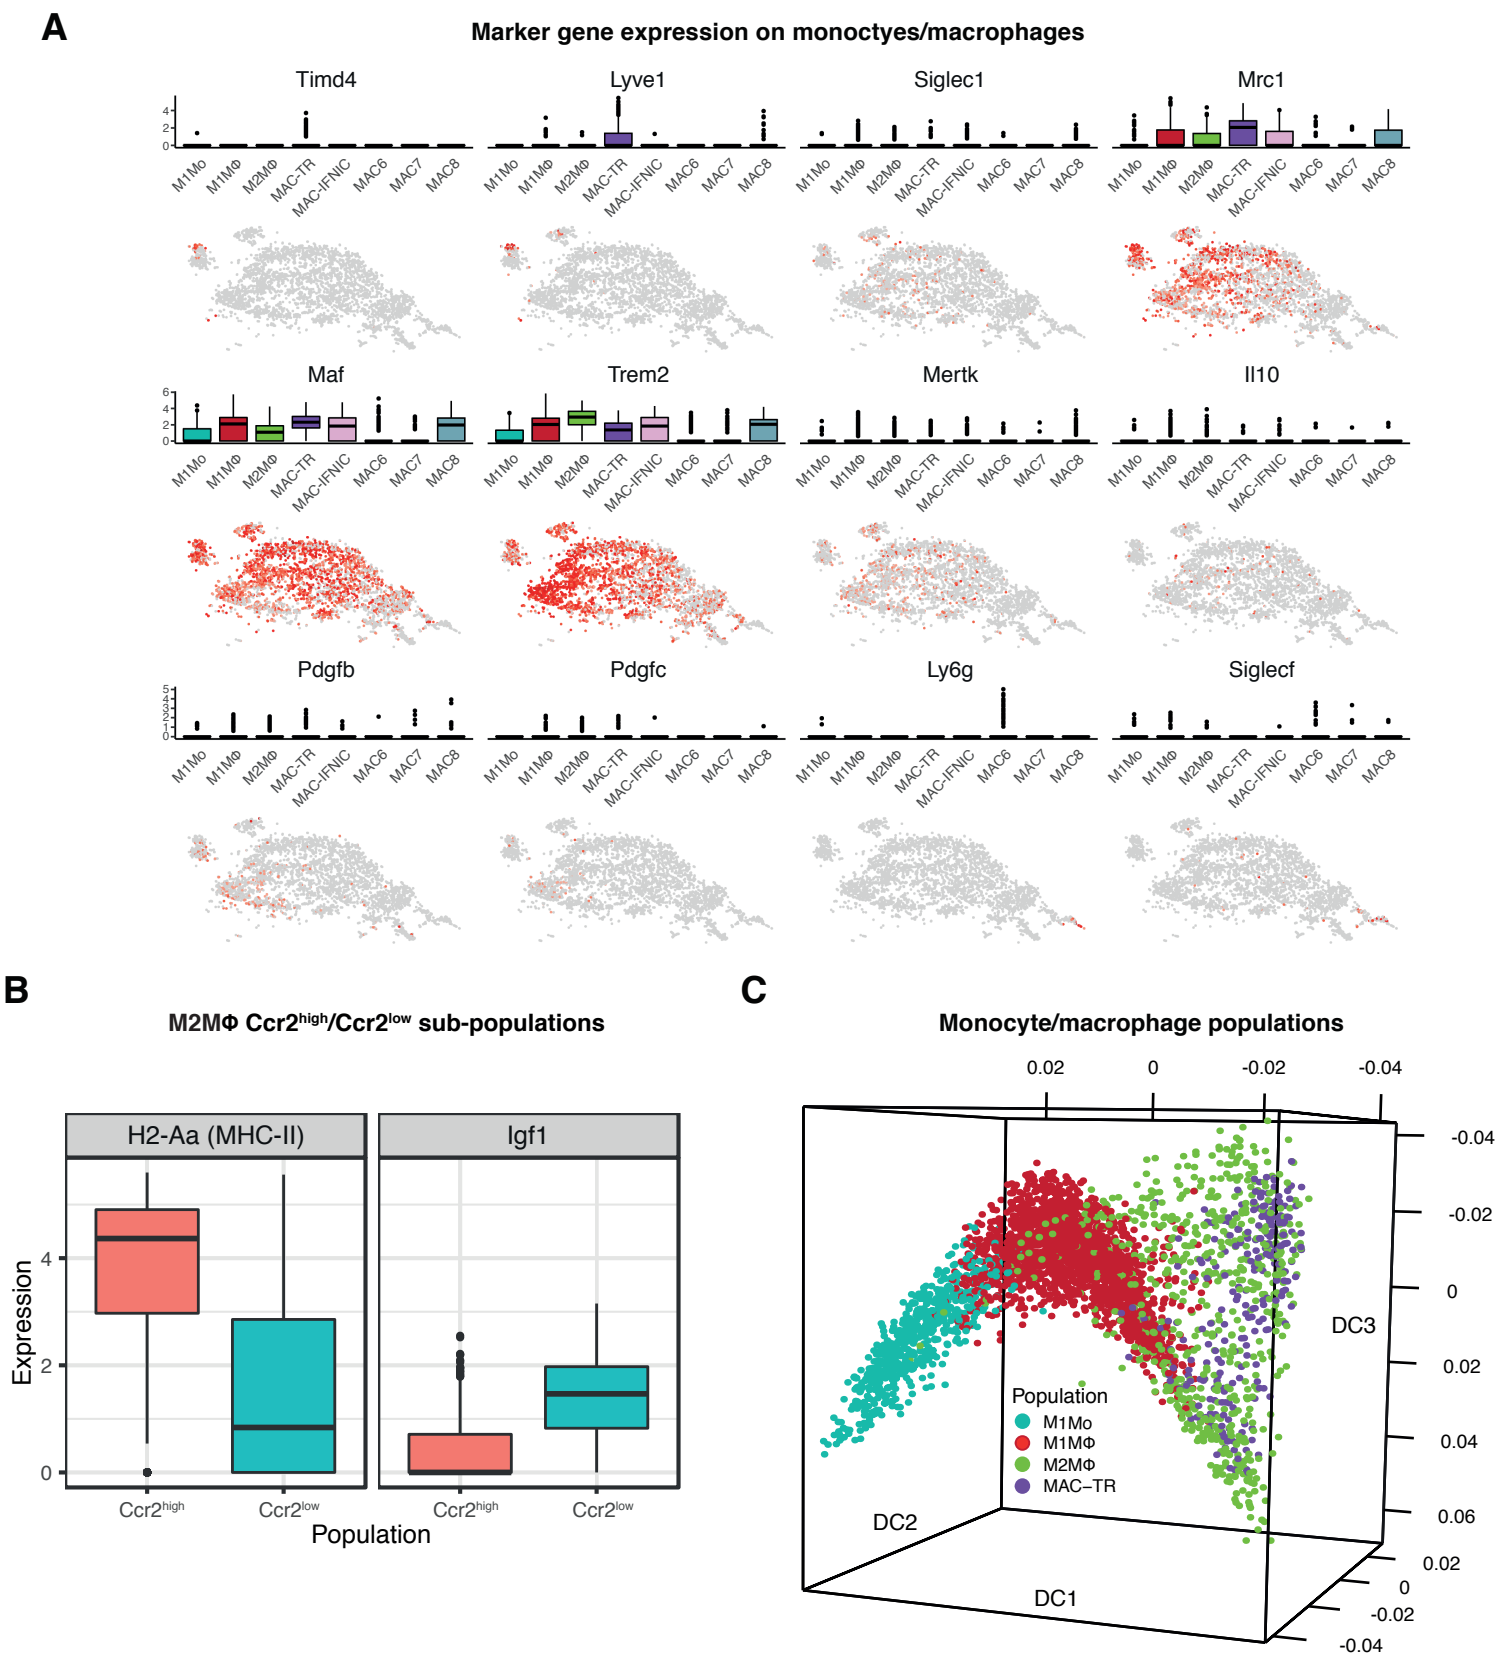

Supplement: supp [file elife-43882-supp-v1.zip]

Figure 4 - figure supplement 4

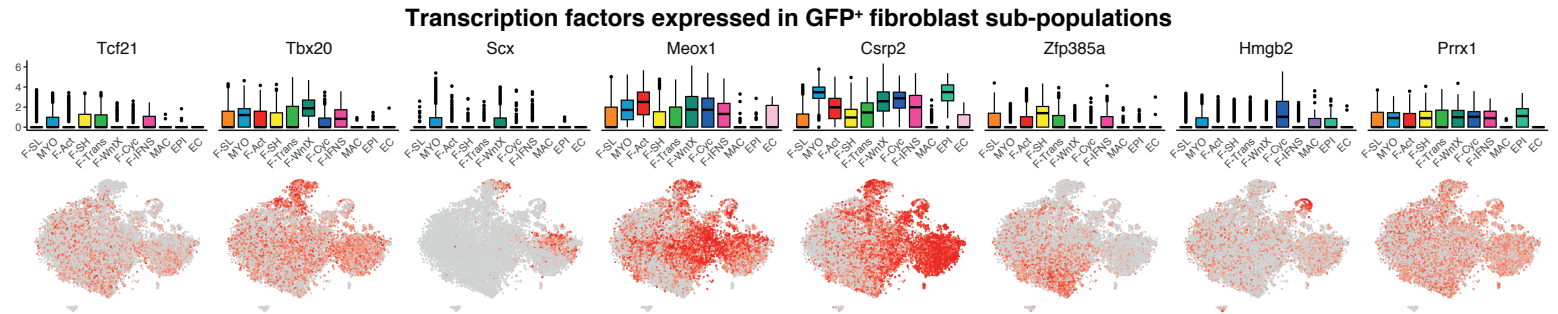

Supplement: supp [file elife-43882-supp-v1.zip]

Figure 3 – figure supplement 1

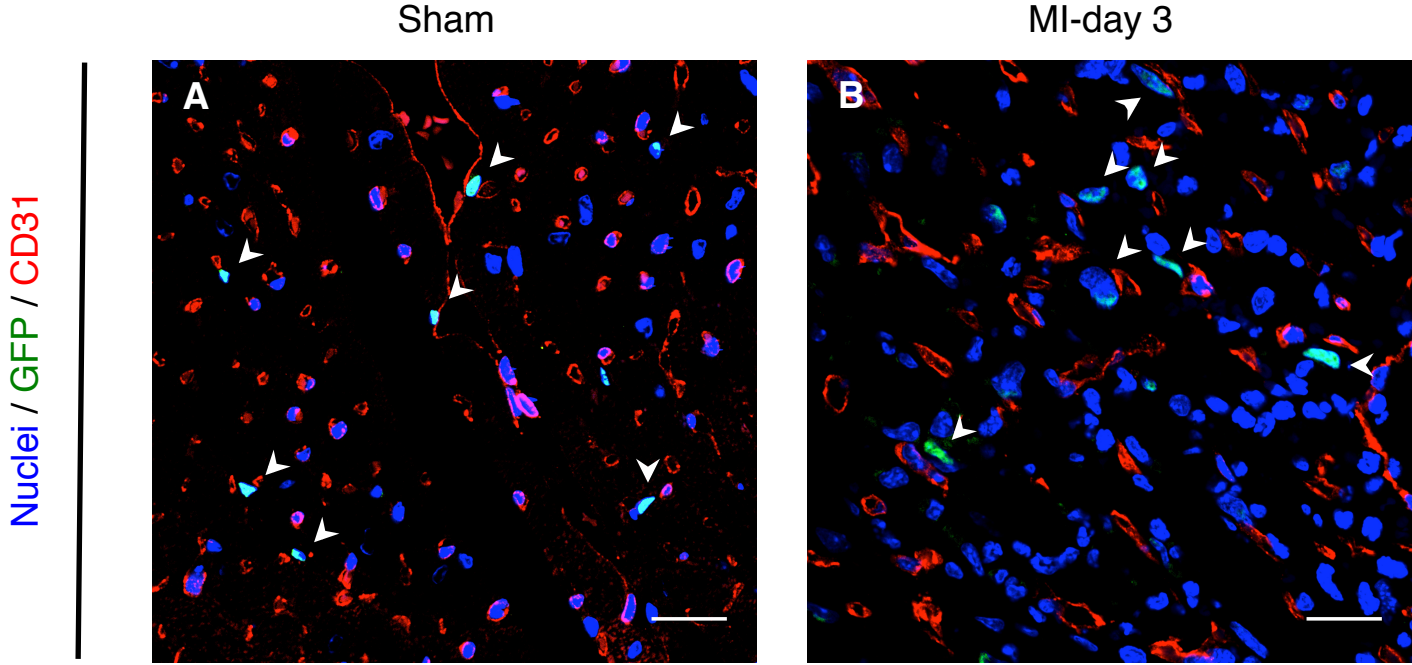

Supplement: supp [file elife-43882-supp-v1.zip]

Figure 1 - figure supplement 4

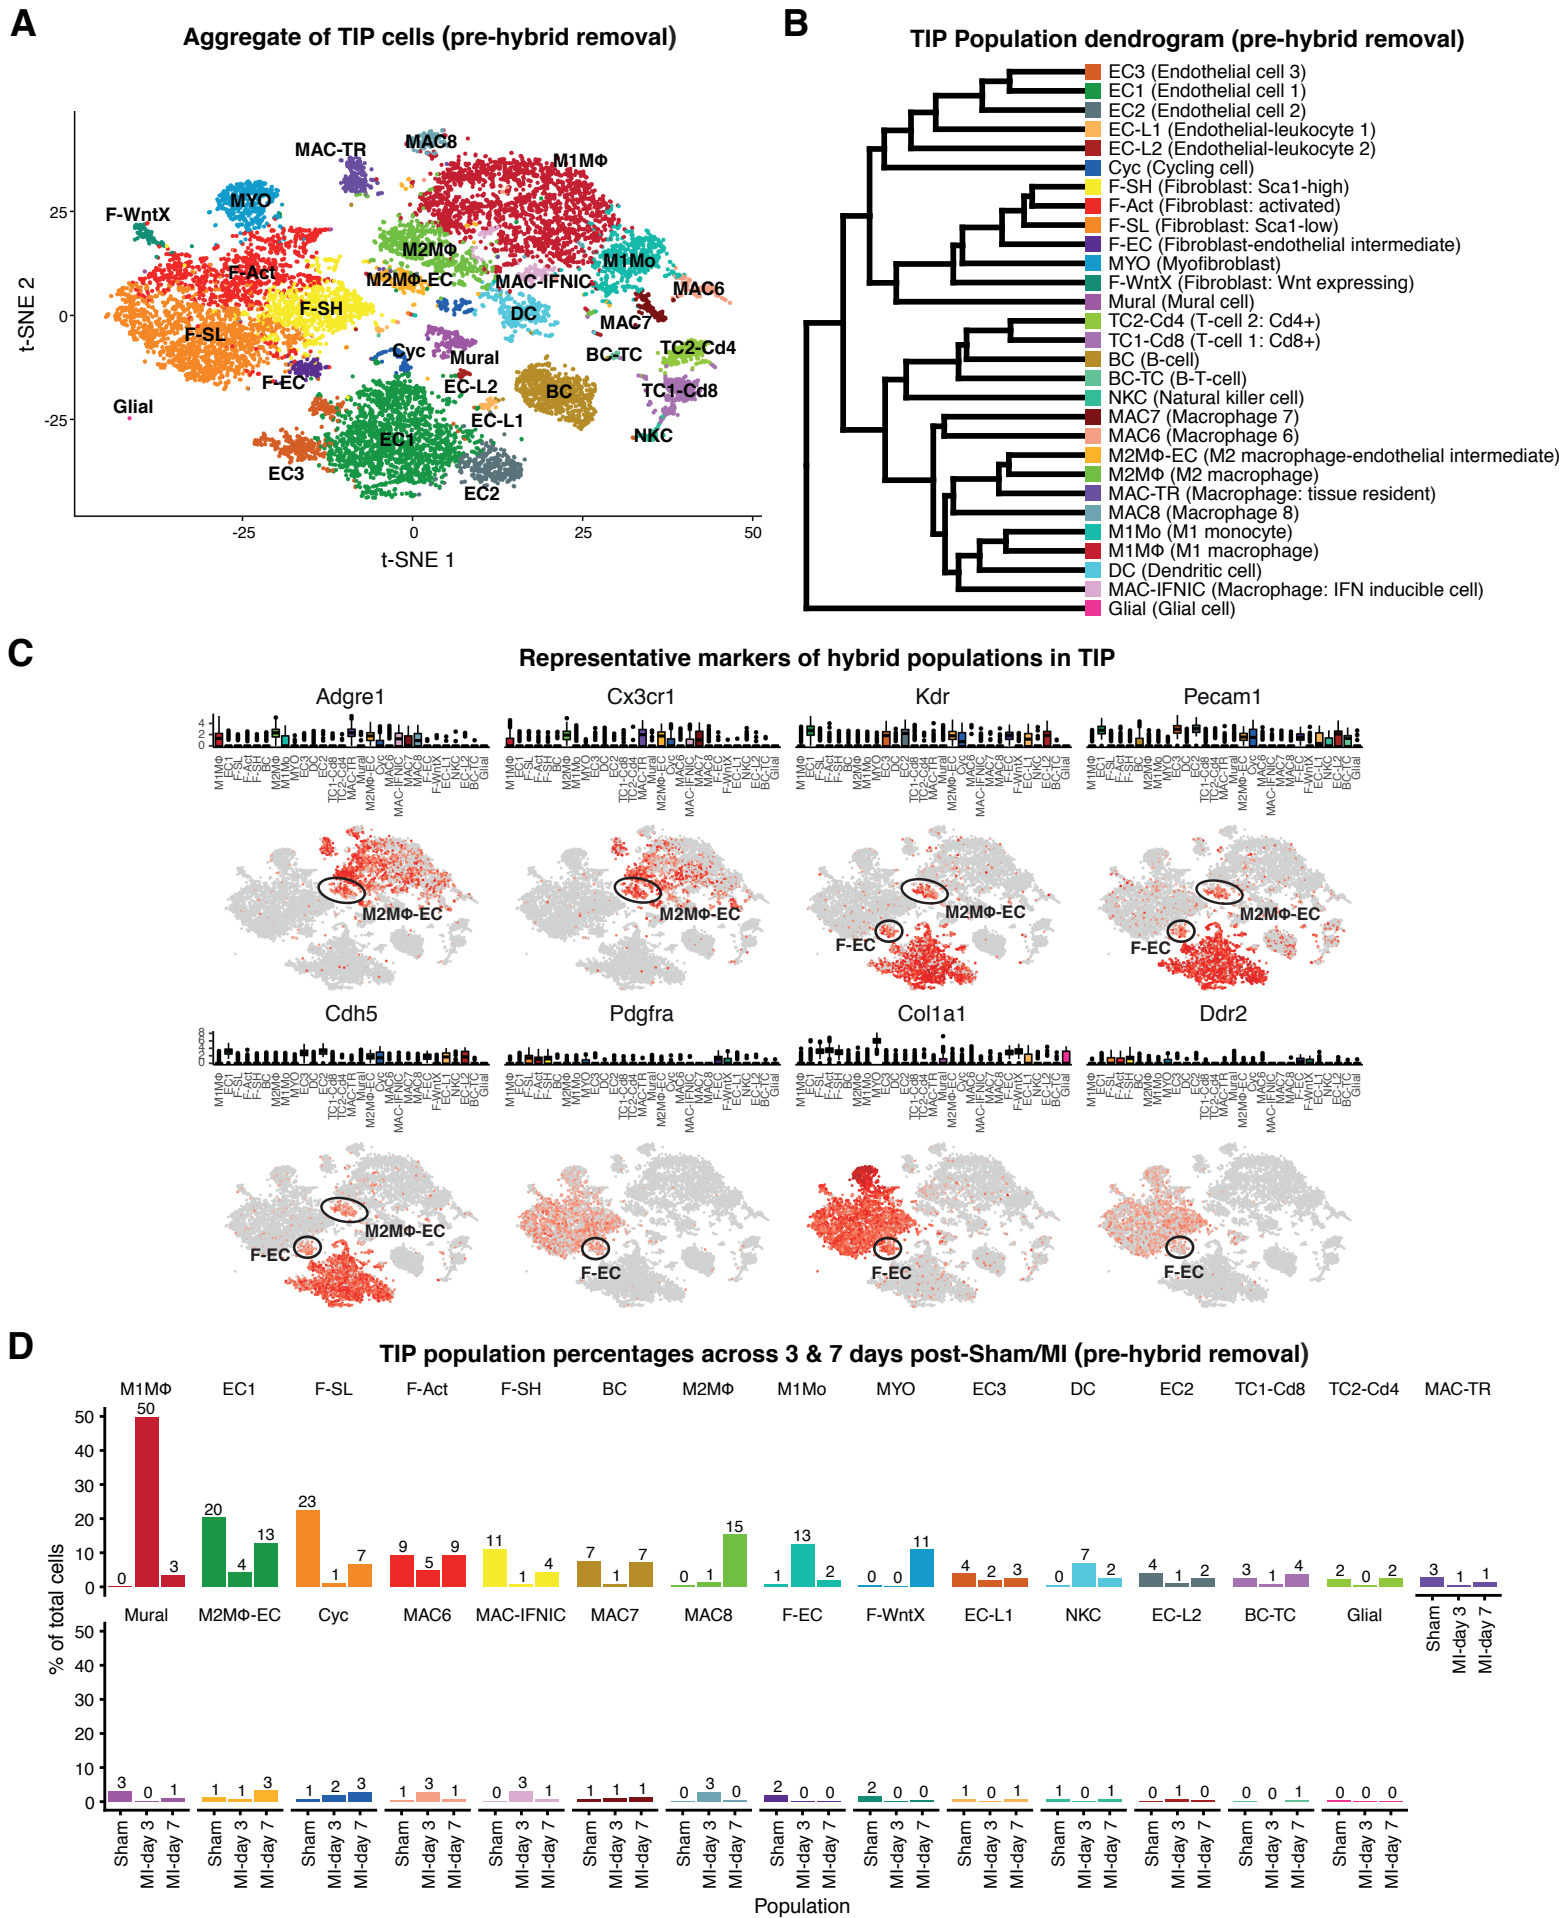

Supplement: supp [file elife-43882-supp-v1.zip]

Figure 1 - figure supplement 6

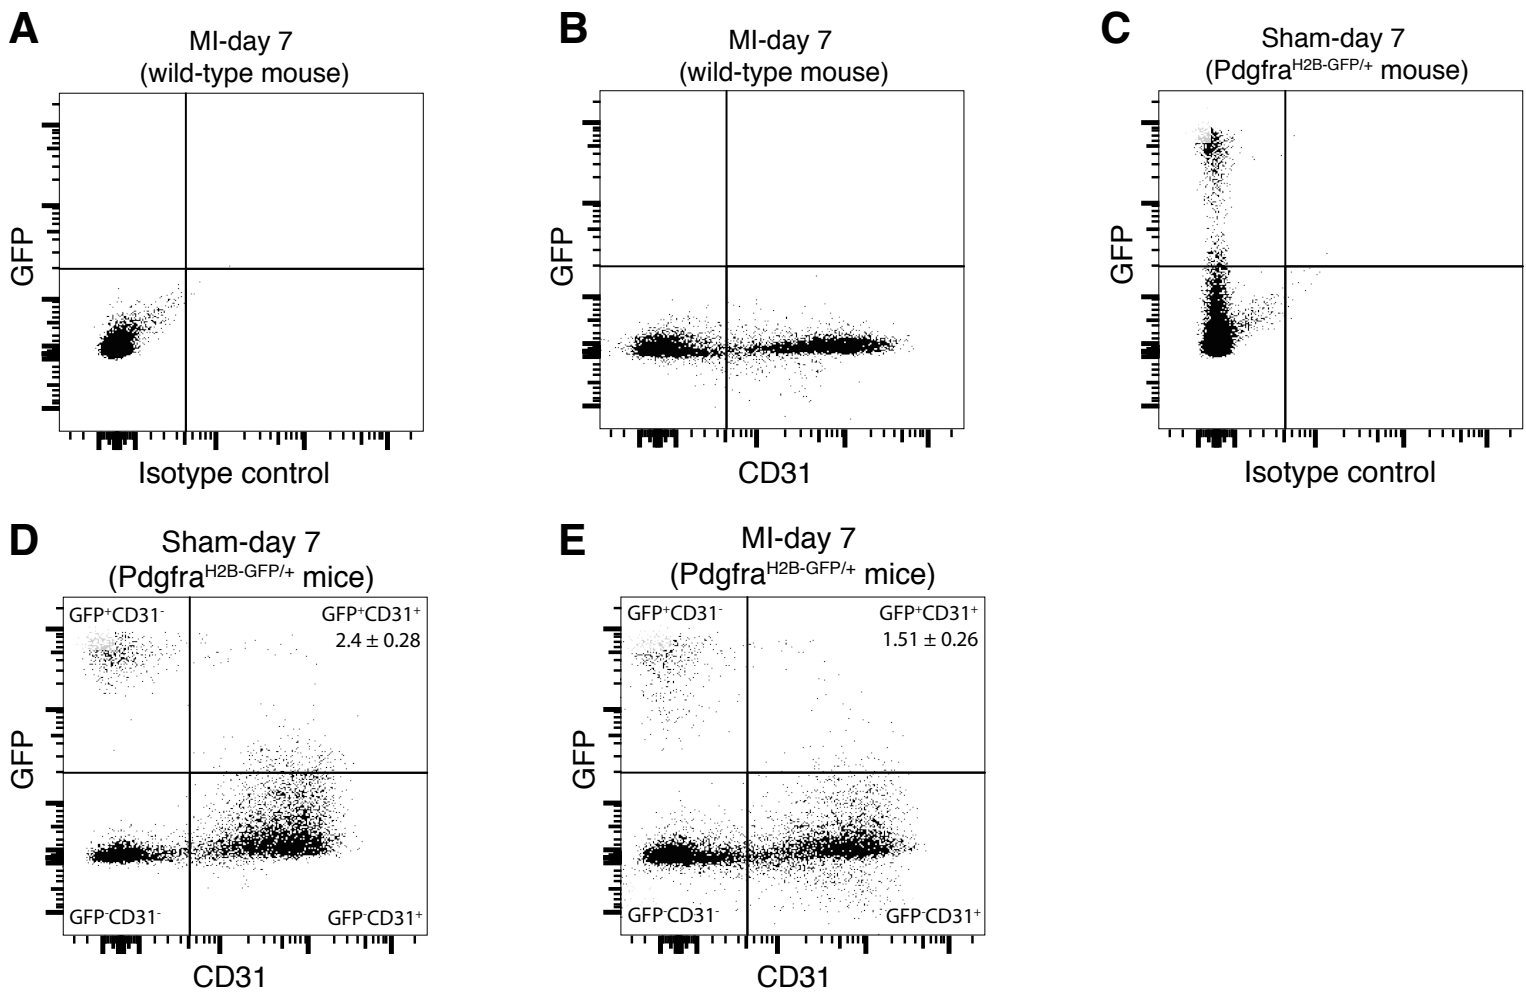

Supplement: supp [file elife-43882-supp-v1.zip]

Figure 6 – figure supplement 1

E14.5

Snout

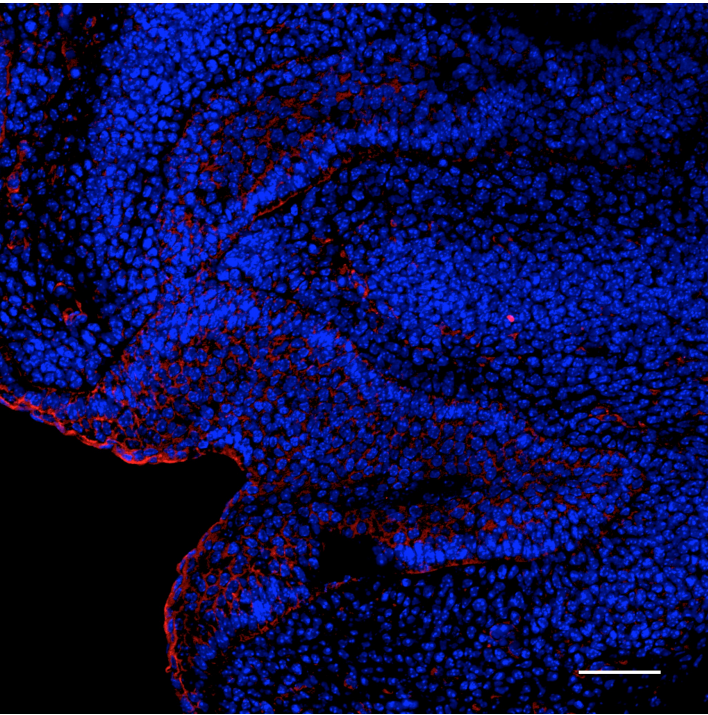

Vibrissae

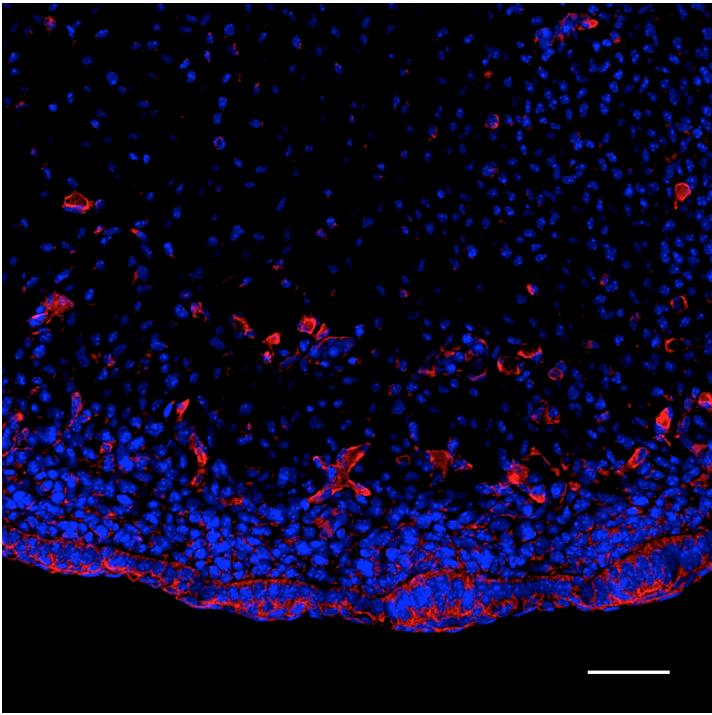

Hind limb - Digit

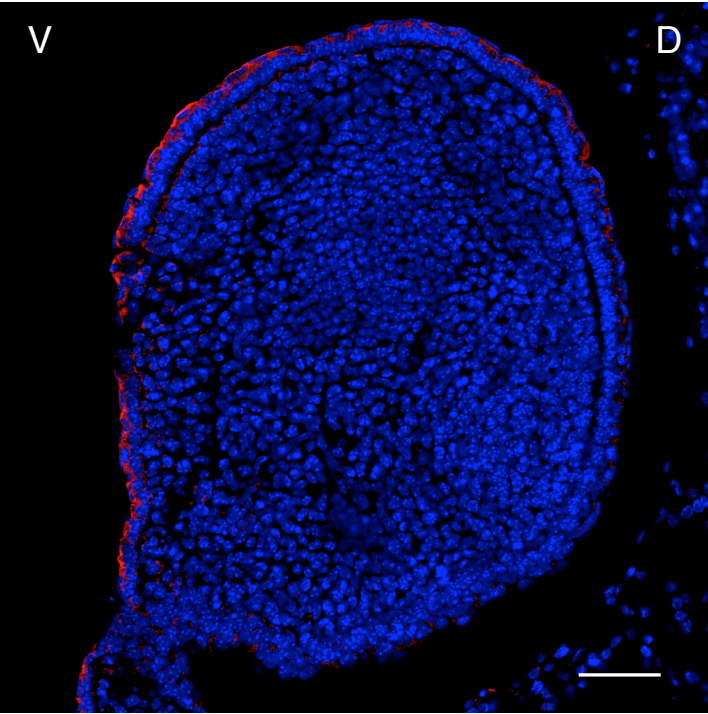

Ribs

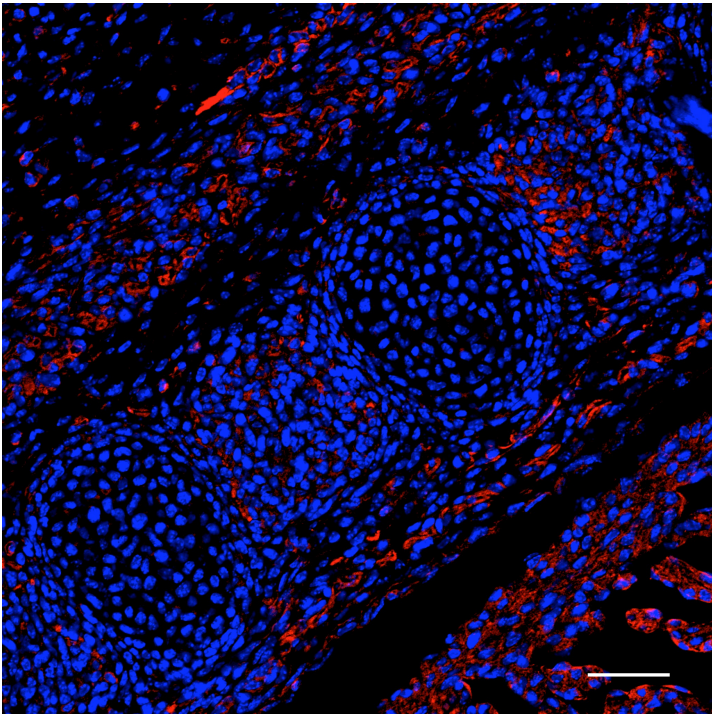

Supplement: supp [file elife-43882-supp-v1.zip]

Figure 1 - figure supplement 3

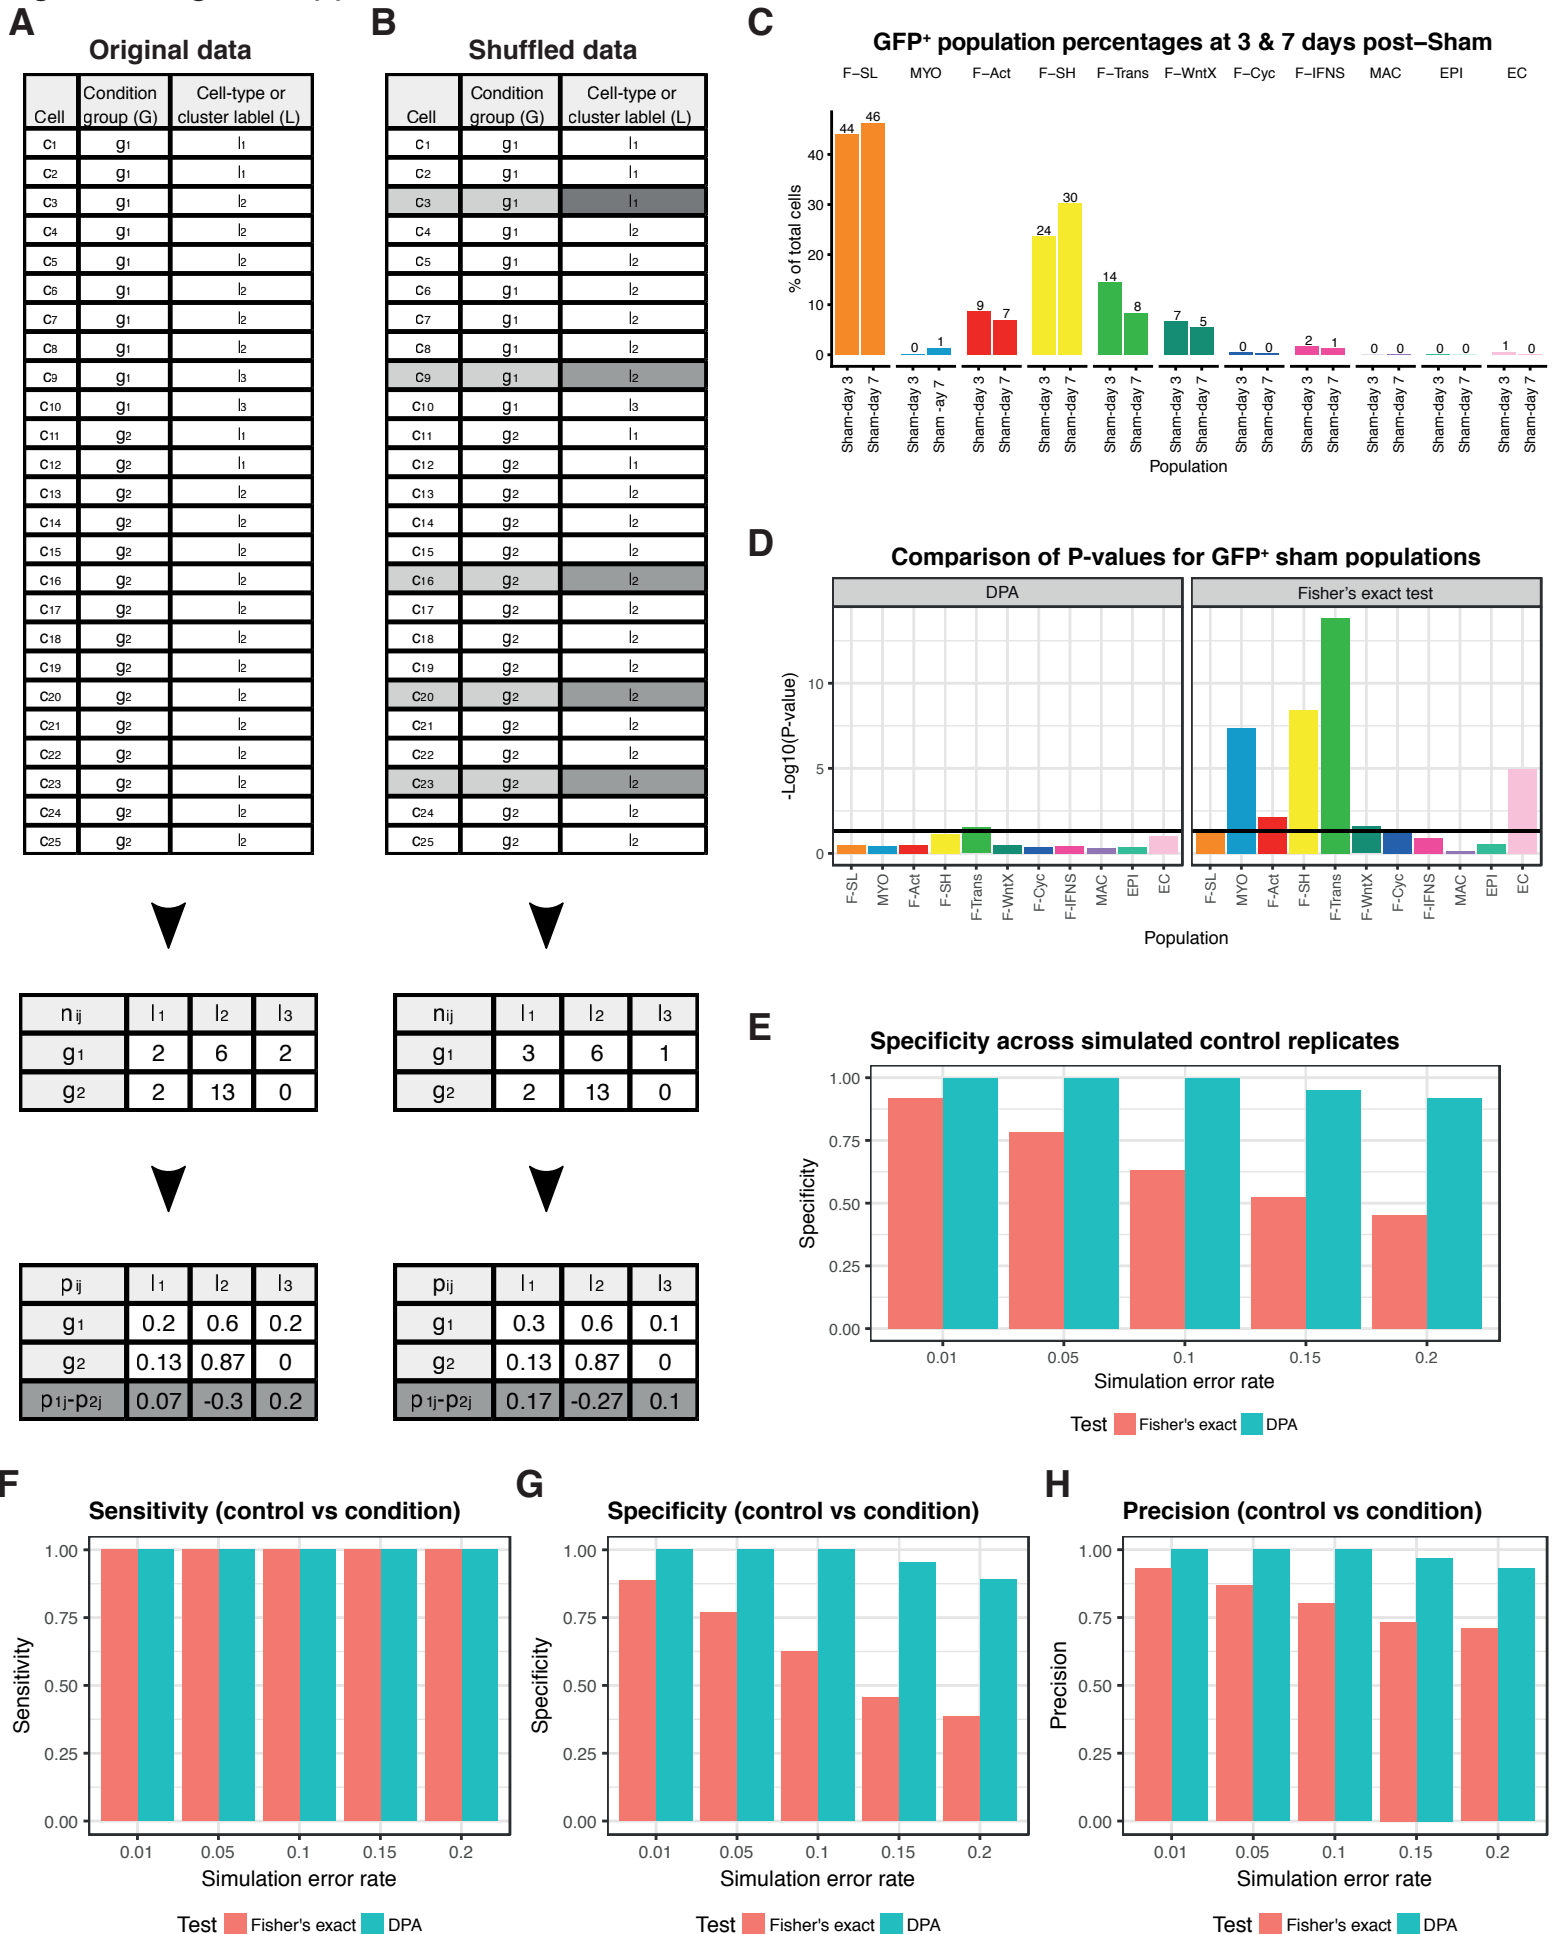

Supplement: supp [file elife-43882-supp-v1.zip]

Figure 6 – figure supplement 2

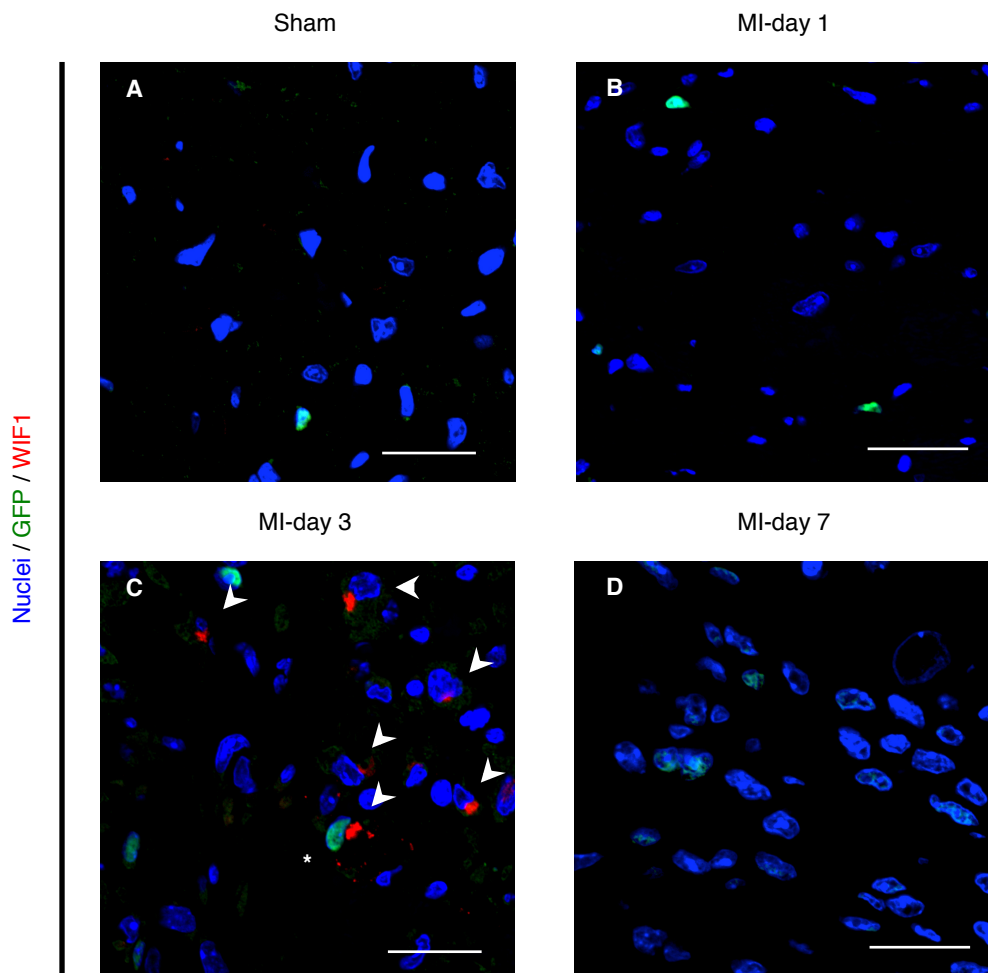

Supplement: supp [file elife-43882-supp-v1.zip]

Figure 8 - figure supplement 1

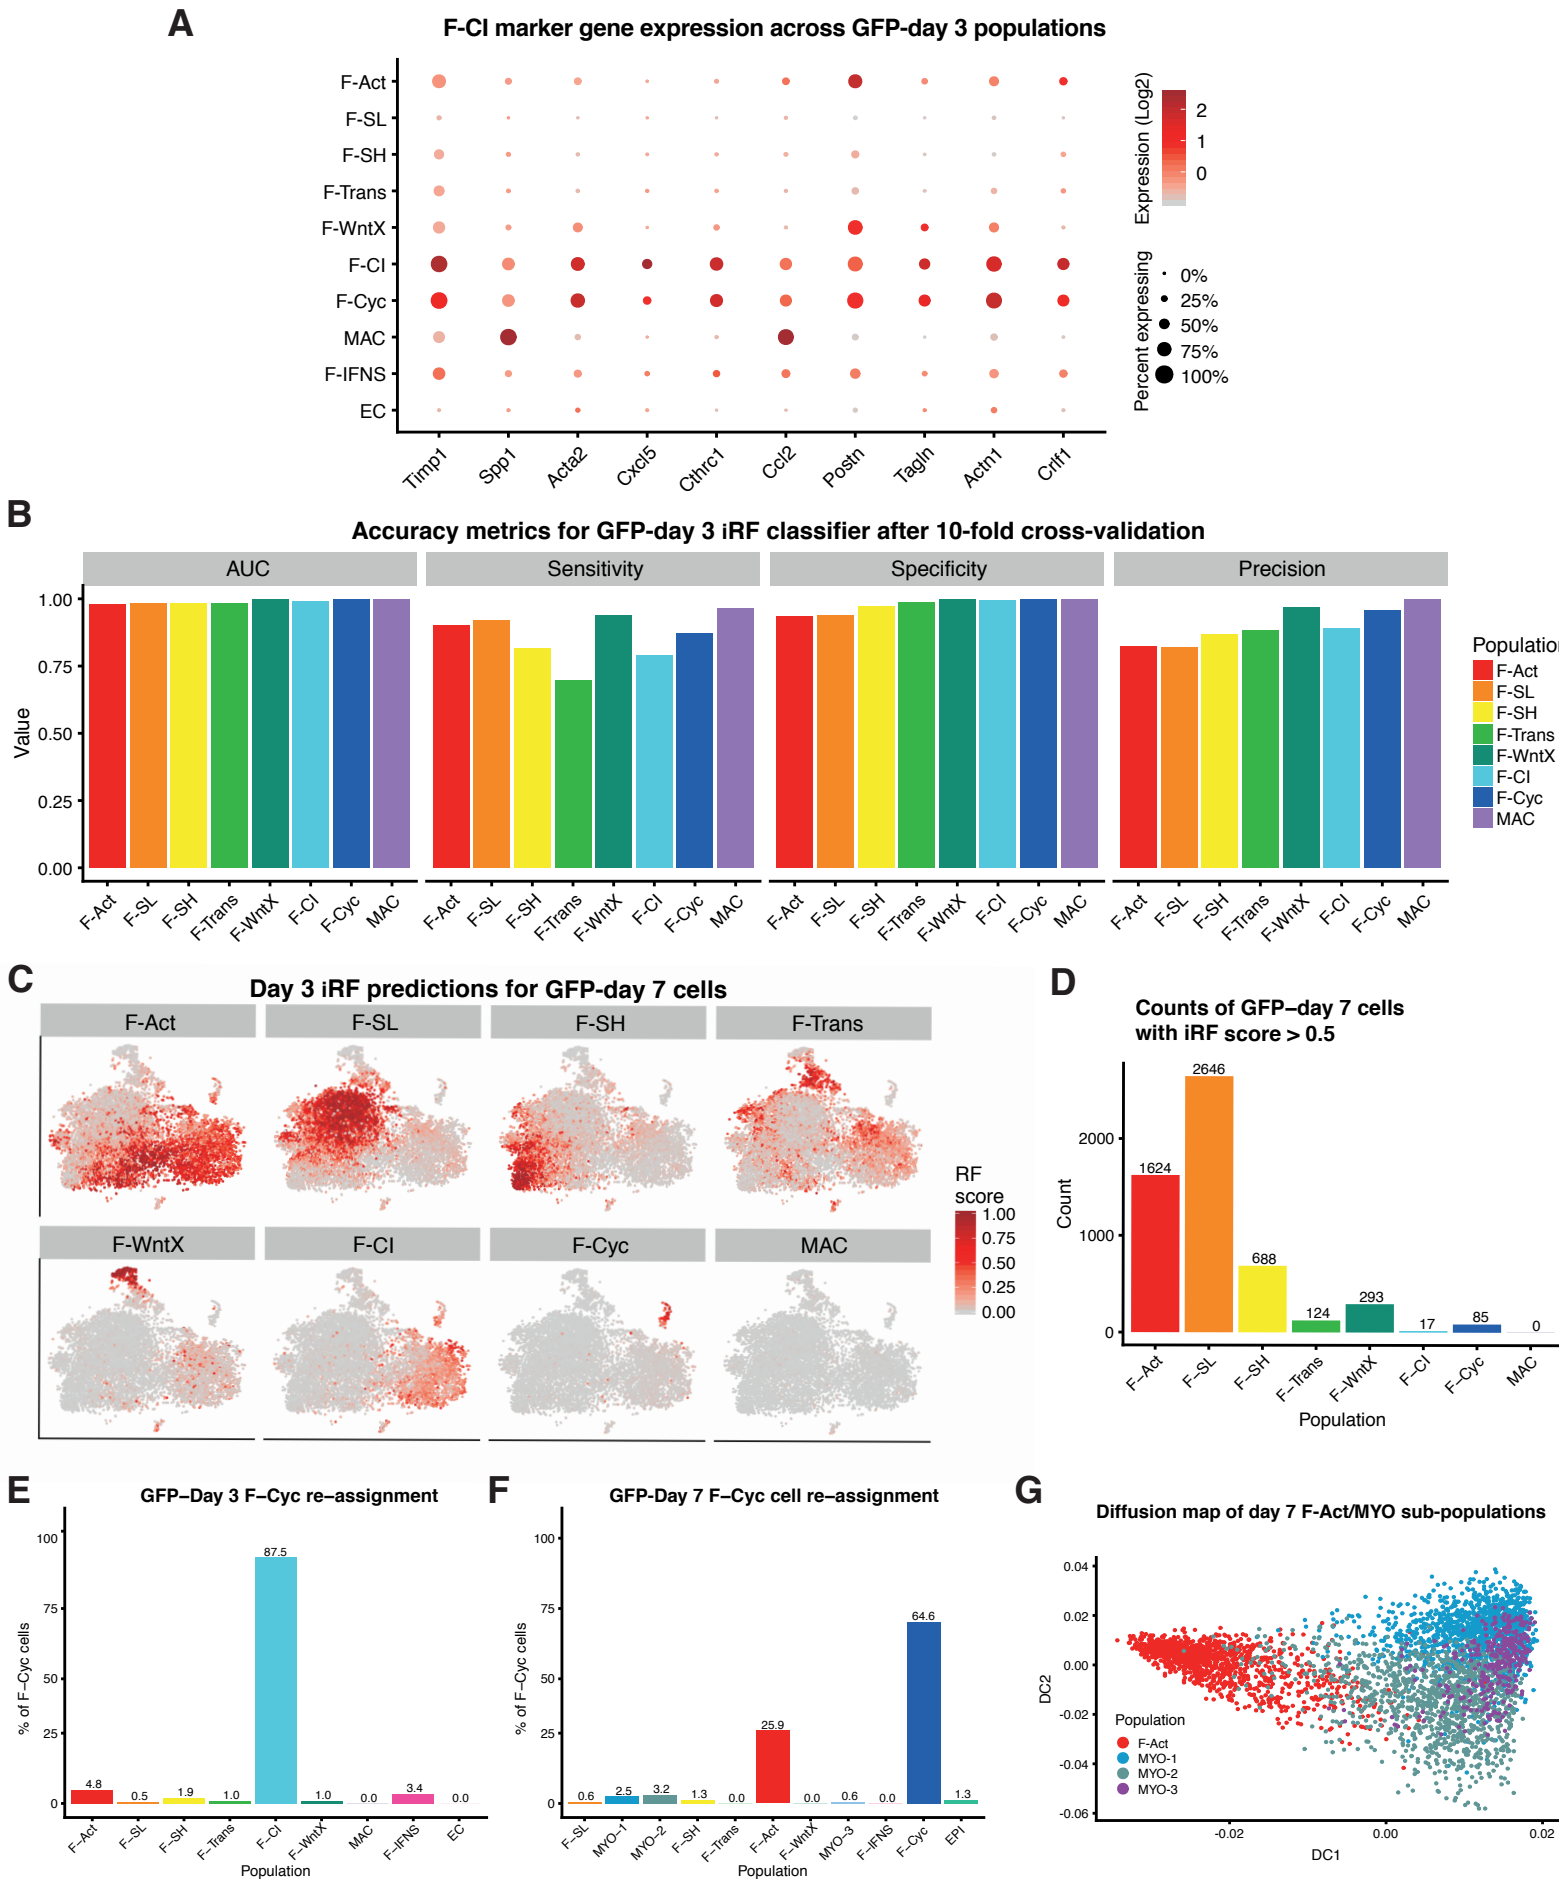

Supplement: supp [file elife-43882-supp-v1.zip]

Figure 5 - figure supplement 1

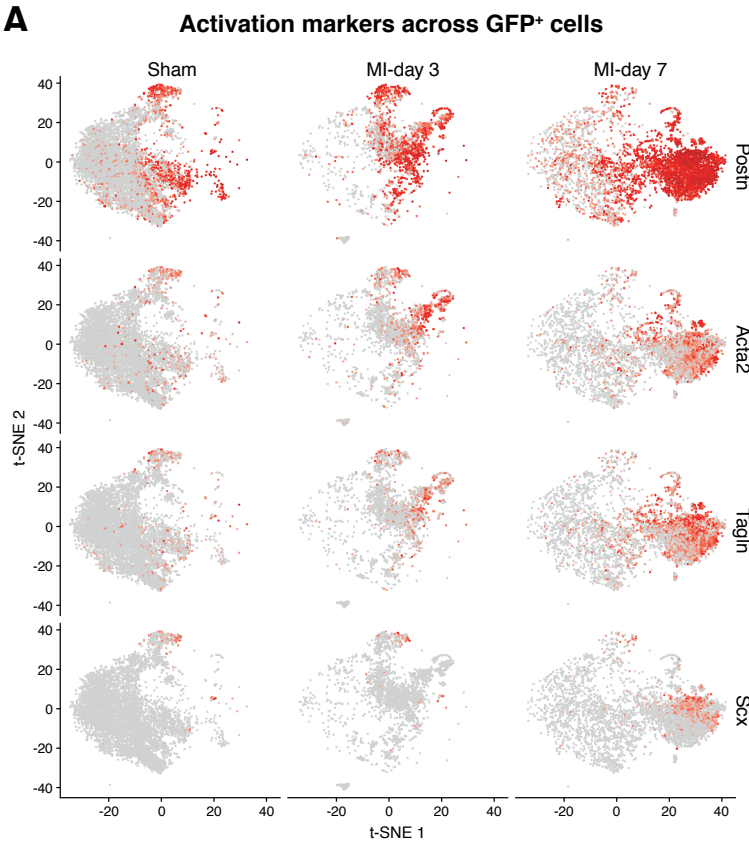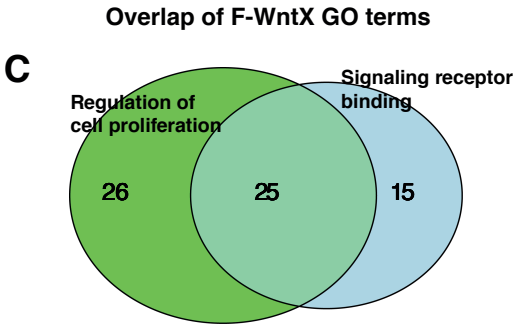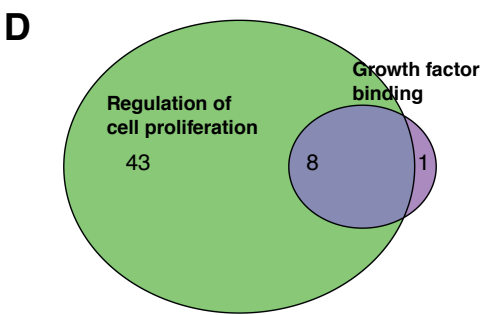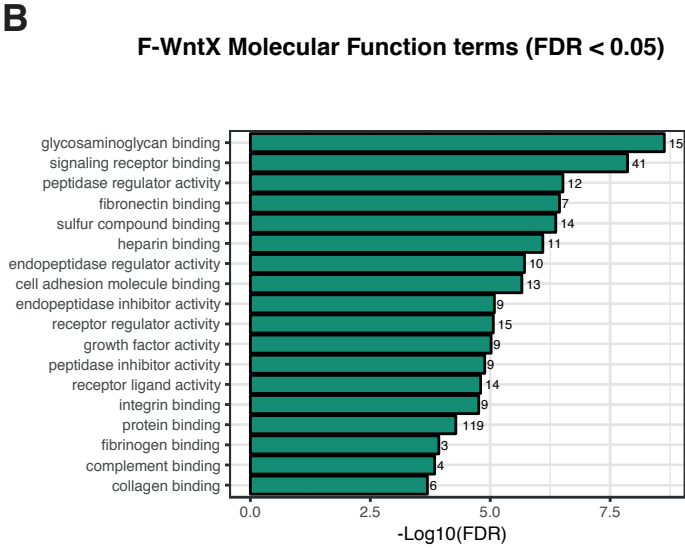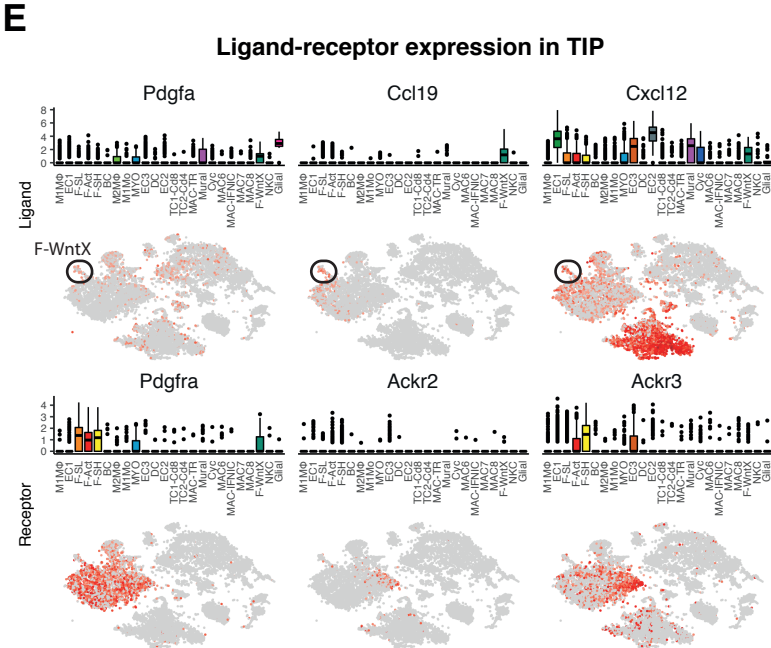

Supplement: supp [file elife-43882-supp-v1.zip]

Figure. 1 - figure supplement 5

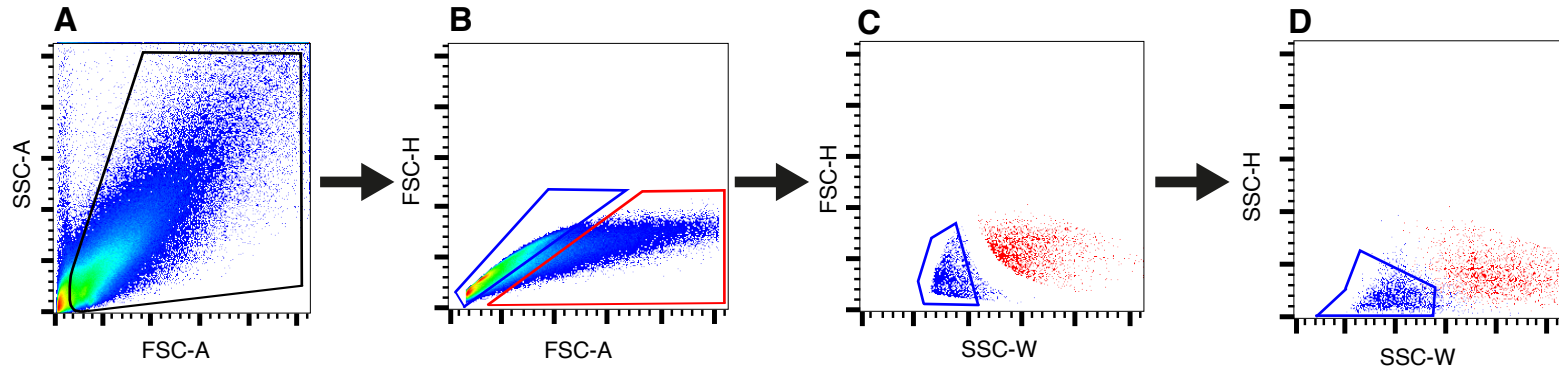

Supplement: supp [file elife-43882-supp-v1.zip]

Figure 1 - figure supplement 7

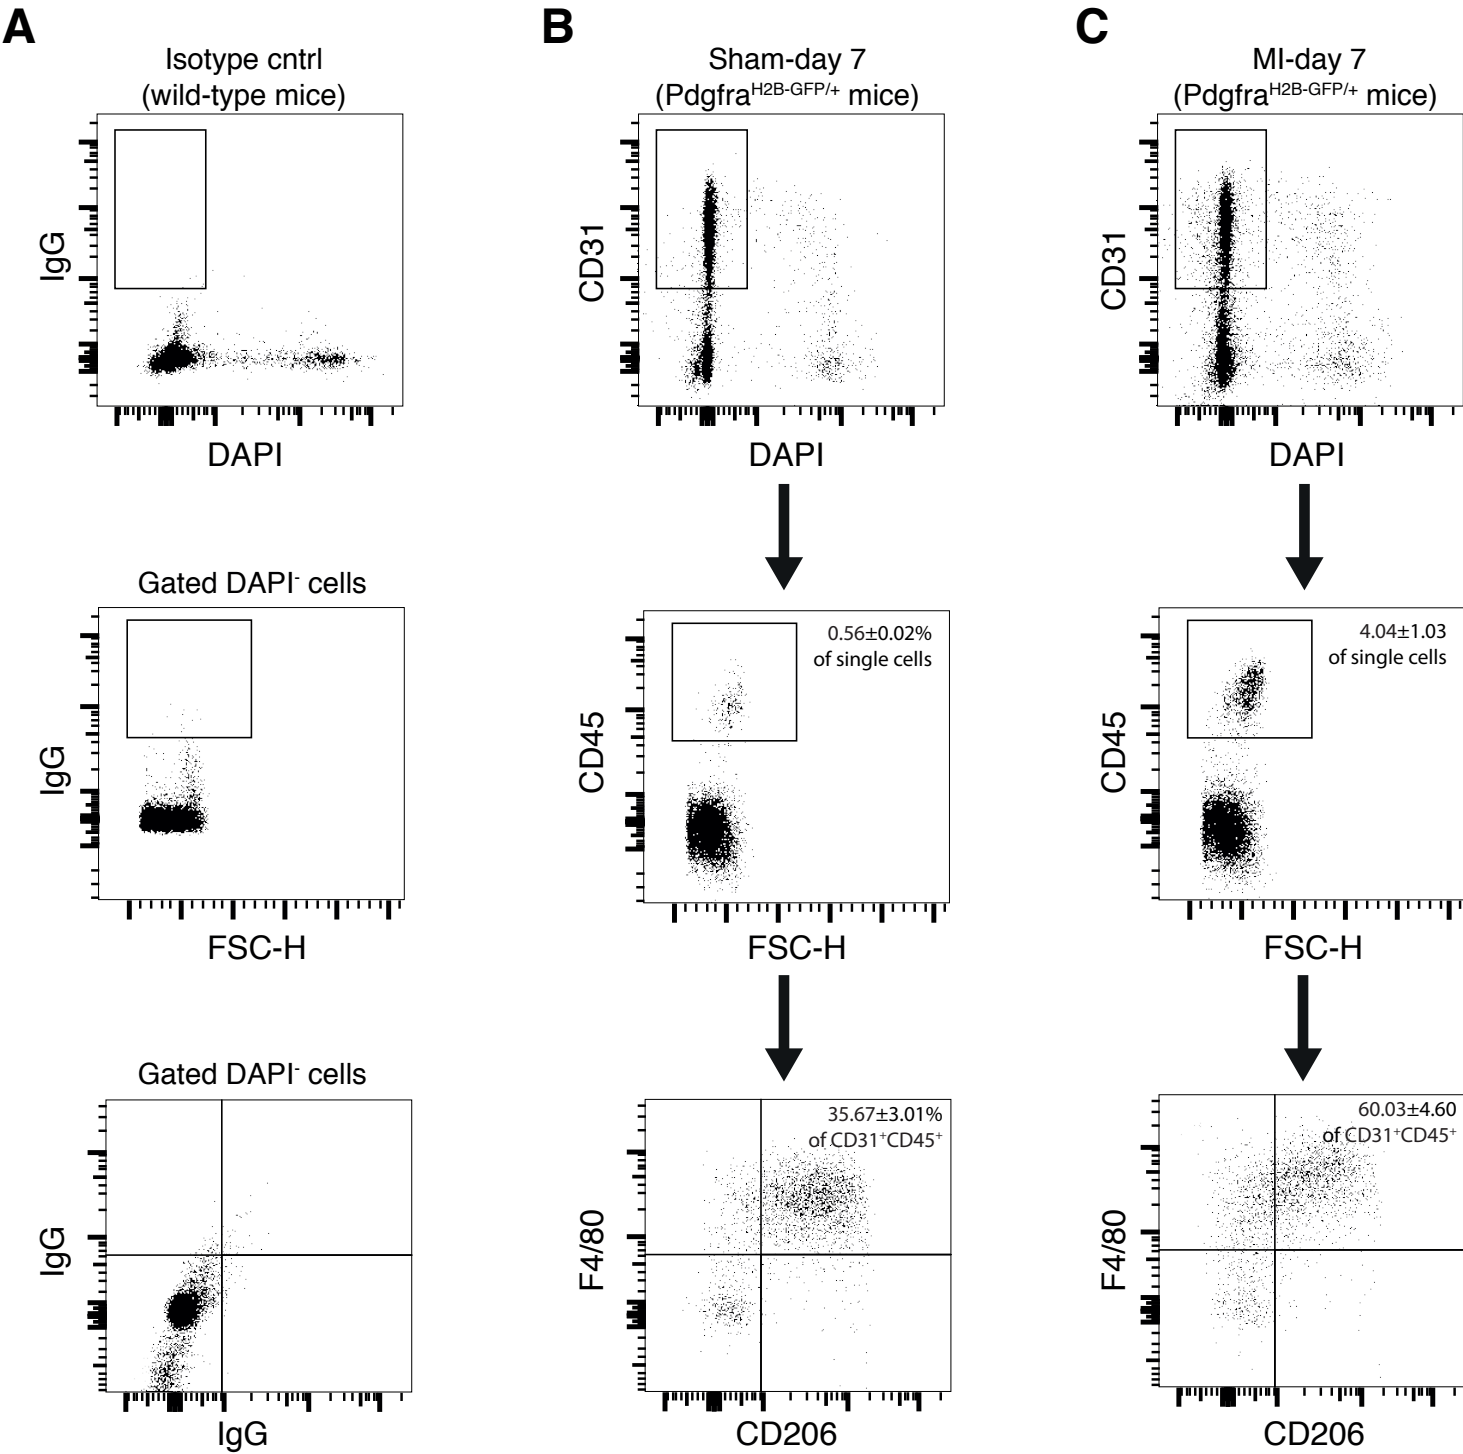

Supplement: supp [file elife-43882-supp-v1.zip]

Figure 4 - figure supplement 5

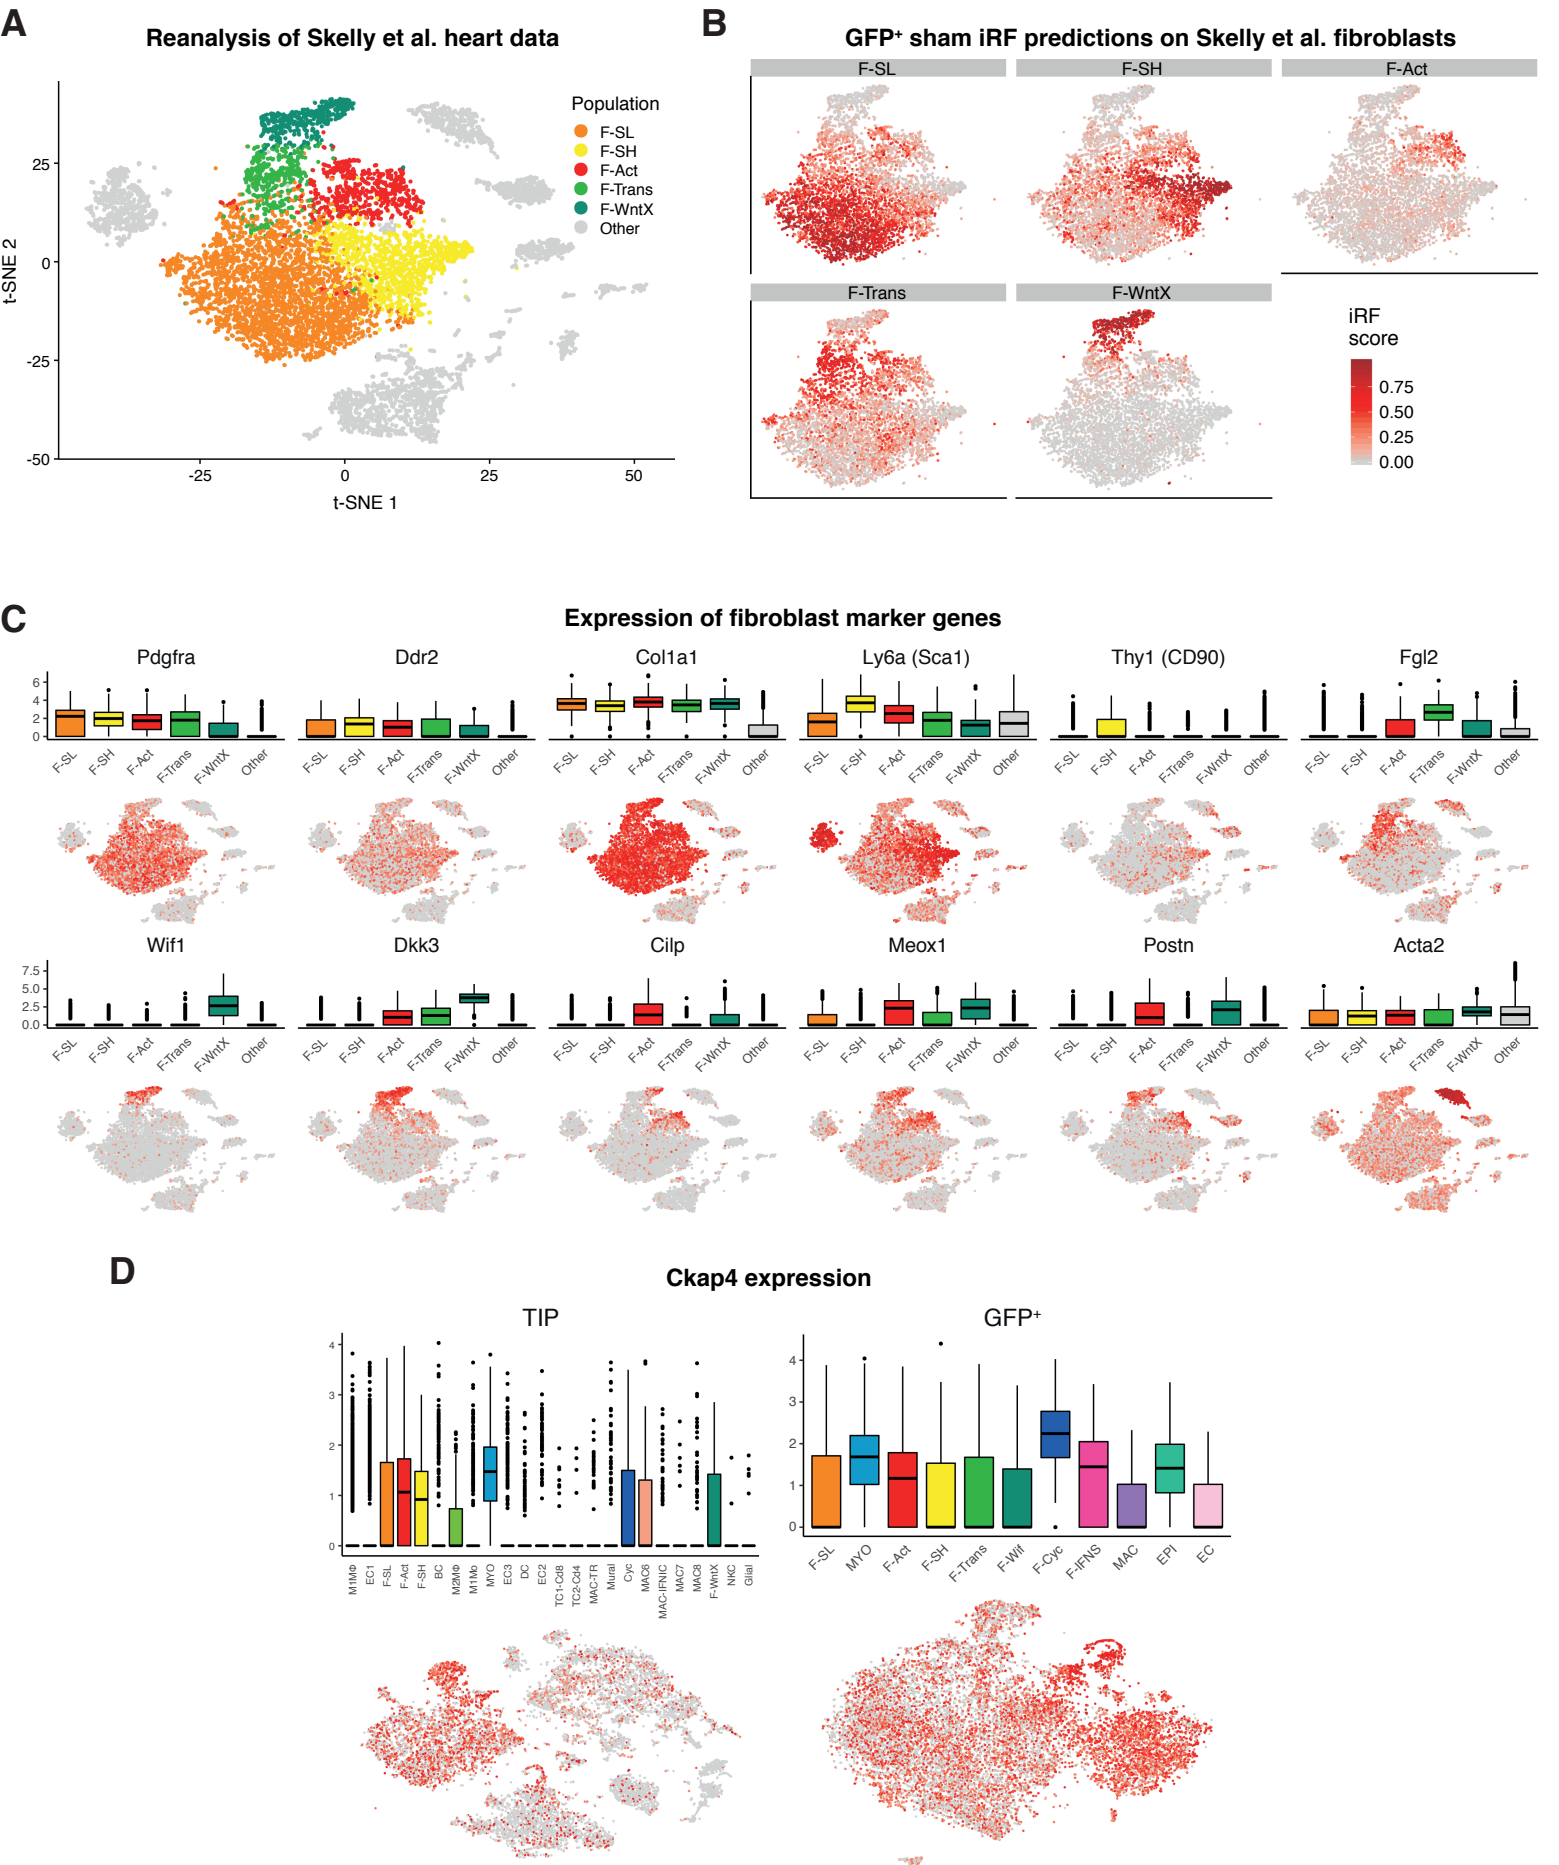

Supplement: supp [file elife-43882-supp-v1.zip › elife_poa_e43882_Figure_4_figure_supplement_5.pdf]
